# Supplementary material
Source: PubMed Central journal article supplement (PMC4336783)
Supplement: NIHMS664701-supplement-Supp_Table_4.pdf [file NIHMS664701-supplement-Supp_Table_4.pdf]

|      |          |          |          |   |                                                                                                        |
|------|----------|----------|----------|---|--------------------------------------------------------------------------------------------------------|
| chr1 | 11167491 | 11167530 | MTOR_1   | - | AGATGTGCCCATCACGTTTTTCTGAGGCTTTTGTACTTTAGATCGGAAGAGCGGTTACAGCAGGAATGCCGAGACCGATCTCGTATGCCGTTCTTGCTTG   |
| chr1 | 11168187 | 11168226 | MTOR_2   | - | CTCTCAAAGTGACTTTGTAAATAAGCAATCAGGTCCCAAGATCGGAAGAGCGGTTACAGCAGGAATGCCGAGACCGATCTCGTATGCCGTTCTTGCTTG    |
| chr1 | 11169296 | 11169335 | MTOR_3   | - | CATGTGTTTACTTAAAGGGACATAAAATCTGAGCACACTAGATCGGAAGAGCGGTTACAGCAGGAATGCCGAGACCGATCTCGTATGCCGTTCTTGCTTG   |
| chr1 | 11169655 | 11169694 | MTOR_4   | - | CCTCTGAGGAACCGCACCAGTGACTAGCTCATTAAAGAAAAGATCGGAAGAGCGGTTACAGCAGGAATGCCGAGACCGATCTCGTATGCCGTTCTTGCTTG  |
| chr1 | 11172858 | 11172897 | MTOR_5   | - | CCACGGGAGGTGCGAAAGGCTCTCCCTTGTGCAGAGTGAGATCGGAAGAGCGGTTACAGCAGGAATGCCGAGACCGATCTCGTATGCCGTTCTTGCTTG    |
| chr1 | 11174324 | 11174363 | MTOR_6   | - | TCAAGTGCTGGGAGCTGAGCTCAGTGGCTCACACCTTAAGATCGGAAGAGCGGTTACAGCAGGAATGCCGAGACCGATCTCGTATGCCGTTCTTGCTTG    |
| chr1 | 11174819 | 11174858 | MTOR_7   | - | ATCGGGAACGAGTCTTCCAAATGGGATCAGGACAGTTAAGATCGGAAGAGCGGTTACAGCAGGAATGCCGAGACCGATCTCGTATGCCGTTCTTGCTTG    |
| chr1 | 11175402 | 11175441 | MTOR_8   | - | GTTCTAGAACCCCAACCTCACTTCCCGGGTGATCACTTTAGATCGGAAGAGCGGTTACAGCAGGAATGCCGAGACCGATCTCGTATGCCGTTCTTGCTTG   |
| chr1 | 11177010 | 11177049 | MTOR_9   | - | TAATTTGGTTTTTTAGTCTTCTTCCATTGTAGTTTGTAGATCGGAAGAGCGGTTACAGCAGGAATGCCGAGACCGATCTCGTATGCCGTTCTTGCTTG     |
| chr1 | 11181252 | 11181291 | MTOR_10  | - | GGGCCCTGCAGACCTGCGCTCTCTCGAACCCTCACTCGCAGATCGGAAGAGCGGTTACAGCAGGAATGCCGAGACCGATCTCGTATGCCGTTCTTGCTTG   |
| chr1 | 11181985 | 11182024 | MTOR_11  | - | CGGCCACGAGAGCTAGTCCCTTCCGTGGCAGGGAATCTAGATCGGAAGAGCGGTTACAGCAGGAATGCCGAGACCGATCTCGTATGCCGTTCTTGCTTG    |
| chr1 | 11184504 | 11184543 | MTOR_12  | - | ACCCTGAAATGGCAACAATTTGAGAAGTCTTCTGGTTTTAGATCGGAAGAGCGGTTACAGCAGGAATGCCGAGACCGATCTCGTATGCCGTTCTTGCTTG   |
| chr1 | 11186628 | 11186667 | MTOR_13  | - | TTGTGCACCTTCTGTACCCACTTCTCCCTCTACACTGGCAGATCGGAAGAGCGGTTACAGCAGGAATGCCGAGACCGATCTCGTATGCCGTTCTTGCTTG   |
| chr1 | 11187016 | 11187055 | MTOR_14  | - | CAGGCTCCTGGCAGGGTTAACTGTCAATTATAGTCTTTCTAGATCGGAAGAGCGGTTACAGCAGGAATGCCGAGACCGATCTCGTATGCCGTTCTTGCTTG  |
| chr1 | 11187630 | 11187669 | MTOR_15  | - | AAAAACACGAAAGACATAACCTGTAGAAATATTCTGCCAGATCGGAAGAGCGGTTACAGCAGGAATGCCGAGACCGATCTCGTATGCCGTTCTTGCTTG    |
| chr1 | 11188010 | 11188049 | MTOR_16  | - | GCCACTGTGGGGCTTCATAGACCCTGGTCCCTTAGCTGGTAGATCGGAAGAGCGGTTACAGCAGGAATGCCGAGACCGATCTCGTATGCCGTTCTTGCTTG  |
| chr1 | 11188460 | 11188499 | MTOR_17  | - | ACTCTGGCAGTTCATCATTAACCTGGTTGGTGGTCAGATCGGAAGAGCGGTTACAGCAGGAATGCCGAGACCGATCTCGTATGCCGTTCTTGCTTG       |
| chr1 | 11188861 | 11188900 | MTOR_18  | - | TTGGTTACAGGTGAAGTCCAGCTCAAGTCTCTTCTGTAGATCGGAAGAGCGGTTACAGCAGGAATGCCGAGACCGATCTCGTATGCCGTTCTTGCTTG     |
| chr1 | 11189744 | 11189783 | MTOR_19  | - | AGGGAAGGATGCAACTCTGGTAGGCCATGTAATGGCAAGATCGGAAGAGCGGTTACAGCAGGAATGCCGAGACCGATCTCGTATGCCGTTCTTGCTTG     |
| chr1 | 11190535 | 11190574 | MTOR_20  | - | CTTCTTCTTATTAACAACCAACCAAGGTGCCAGGCTCTCAGATCGGAAGAGCGGTTACAGCAGGAATGCCGAGACCGATCTCGTATGCCGTTCTTGCTTG   |
| chr1 | 11193086 | 11193125 | MTOR_21  | - | GCAGGCCACCTGTGAGACCCAGCACCTTGGCTGGCTCGTGTAGATCGGAAGAGCGGTTACAGCAGGAATGCCGAGACCGATCTCGTATGCCGTTCTTGCTTG |
| chr1 | 11194357 | 11194396 | MTOR_22  | - | CACTGACCTGGGGCAAGTCATATCCAGCCCTGTATCCAGATCGGAAGAGCGGTTACAGCAGGAATGCCGAGACCGATCTCGTATGCCGTTCTTGCTTG     |
| chr1 | 11199310 | 11199349 | MTOR_23  | - | CAATGCATCCAGAACAGACACCTTCTCCAGAATGCTCGCAGATCGGAAGAGCGGTTACAGCAGGAATGCCGAGACCGATCTCGTATGCCGTTCTTGCTTG   |
| chr1 | 11199539 | 11199578 | MTOR_24  | - | ACCACCCACCATGAGGACGGTAGGCTCCAGCTGGTGTCCAGATCGGAAGAGCGGTTACAGCAGGAATGCCGAGACCGATCTCGTATGCCGTTCTTGCTTG   |
| chr1 | 11204654 | 11204693 | MTOR_25  | - | TAGAAAGCCCCAGTTCACCCACCTACCCCTACCCCTCCAAGATCGGAAGAGCGGTTACAGCAGGAATGCCGAGACCGATCTCGTATGCCGTTCTTGCTTG   |
| chr1 | 11204974 | 11205013 | MTOR_26  | - | ACTATTCTGCACATTGTCAATTTTGGGCTTATTTCCATAAGATCGGAAGAGCGGTTACAGCAGGAATGCCGAGACCGATCTCGTATGCCGTTCTTGCTTG   |
| chr1 | 11206682 | 11206721 | MTOR_27  | - | ACATGCACCCAGATCTCTCAGTGAGGAAAGATTGTAGTGAGATCGGAAGAGCGGTTACAGCAGGAATGCCGAGACCGATCTCGTATGCCGTTCTTGCTTG   |
| chr1 | 11210132 | 11210171 | MTOR_28  | - | CCTCACAGGCCACCTGTGAAGGATGGGTTGAGTGGGCTAAGATCGGAAGAGCGGTTACAGCAGGAATGCCGAGACCGATCTCGTATGCCGTTCTTGCTTG   |
| chr1 | 11217158 | 11217197 | MTOR_29  | - | TAGAATGATGGCATGTGGCTGCAAGAGACTTCGTCTAGATCGGAAGAGCGGTTACAGCAGGAATGCCGAGACCGATCTCGTATGCCGTTCTTGCTTG      |
| chr1 | 11227448 | 11227487 | MTOR_30  | - | CATTTCTTTTGGAAAAGCAGGAGGTAGAGACTTGGCTAGAGATCGGAAGAGCGGTTACAGCAGGAATGCCGAGACCGATCTCGTATGCCGTTCTTGCTTG   |
| chr1 | 11259264 | 11259303 | MTOR_31  | - | AACCCTTTTAATTGCTGCCCTCATGCAAAATGACCTCTCAGATCGGAAGAGCGGTTACAGCAGGAATGCCGAGACCGATCTCGTATGCCGTTCTTGCTTG   |
| chr1 | 11259547 | 11259586 | MTOR_32  | - | TCCCATTTGTCCAGATGGAGGCTGACAGGGAACCAAGCTGGAGATCGGAAGAGCGGTTACAGCAGGAATGCCGAGACCGATCTCGTATGCCGTTCTTGCTTG |
| chr1 | 11264567 | 11264606 | MTOR_33  | - | TCAGGGCGGGTGGAGAAGATCAGCACATAGAAAACGATATAGATCGGAAGAGCGGTTACAGCAGGAATGCCGAGACCGATCTCGTATGCCGTTCTTGCTTG  |
| chr1 | 11269318 | 11269357 | MTOR_34  | - | TGTTTCAGTGACTGGGAAAGCAGAGCTCTGCTCTTCAAGATCGGAAGAGCGGTTACAGCAGGAATGCCGAGACCGATCTCGTATGCCGTTCTTGCTTG     |
| chr1 | 11270820 | 11270859 | MTOR_35  | - | CTTCTTTTCTGTGAAGTCCCTGTTGTCTTTACTAGATCGGAAGAGCGGTTACAGCAGGAATGCCGAGACCGATCTCGTATGCCGTTCTTGCTTG         |
| chr1 | 11272318 | 11272357 | MTOR_36  | - | AGTCTGGACAGACAGGTGCTCTTCTGCCTTATTTGAAAGAGATCGGAAGAGCGGTTACAGCAGGAATGCCGAGACCGATCTCGTATGCCGTTCTTGCTTG   |
| chr1 | 11272802 | 11272841 | MTOR_37  | - | CCTCTTTGGGACTAGCAATCTTAAAGCTTAAATGTTTTGTAGATCGGAAGAGCGGTTACAGCAGGAATGCCGAGACCGATCTCGTATGCCGTTCTTGCTTG  |
| chr1 | 11273405 | 11273444 | MTOR_38  | - | TAGTCTATCCTCCAGAGAGATTTTCTGATTTCTCTGAGTAGATCGGAAGAGCGGTTACAGCAGGAATGCCGAGACCGATCTCGTATGCCGTTCTTGCTTG   |
| chr1 | 11276154 | 11276193 | MTOR_39  | - | GTTAATGCTTTGGCCTCTTCCATGTTTGGGTCAAGGAAGGAGATCGGAAGAGCGGTTACAGCAGGAATGCCGAGACCGATCTCGTATGCCGTTCTTGCTTG  |
| chr1 | 11288674 | 11288713 | MTOR_40  | - | CAAACCCCAATCTTCTTCTCTCTGACCCACACATGAGATCGGAAGAGCGGTTACAGCAGGAATGCCGAGACCGATCTCGTATGCCGTTCTTGCTTG       |
| chr1 | 11290931 | 11290970 | MTOR_41  | - | GGTAGCCATGAAAAGACTTGCCTTCTCACTCACAGACAGATCGGAAGAGCGGTTACAGCAGGAATGCCGAGACCGATCTCGTATGCCGTTCTTGCTTG     |
| chr1 | 11291306 | 11291345 | MTOR_42  | - | TGGCAAACCTGGTCTTTAAAGACTTTGCTGGGACGATGGCAGATCGGAAGAGCGGTTACAGCAGGAATGCCGAGACCGATCTCGTATGCCGTTCTTGCTTG  |
| chr1 | 11292442 | 11292481 | MTOR_43  | - | CTGCTTCTGATTGAGCAAGACAGACCCATGAGTCCAGGAGATCGGAAGAGCGGTTACAGCAGGAATGCCGAGACCGATCTCGTATGCCGTTCTTGCTTG    |
| chr1 | 11293404 | 11293443 | MTOR_44  | - | AGTACTTTTTCCATAGCGGAGATAGGGTGGAAAAGAAACAGATCGGAAGAGCGGTTACAGCAGGAATGCCGAGACCGATCTCGTATGCCGTTCTTGCTTG   |
| chr1 | 11294149 | 11294188 | MTOR_45  | - | CCGAGAGGCTGGTCTTCTGTGCGTTGTCATCAGCTCAGATCGGAAGAGCGGTTACAGCAGGAATGCCGAGACCGATCTCGTATGCCGTTCTTGCTTG      |
| chr1 | 11297849 | 11297888 | MTOR_46  | - | TGATGCCACAGCCACAGGACTCGGGAAGACAGACTCTCGCAGATCGGAAGAGCGGTTACAGCAGGAATGCCGAGACCGATCTCGTATGCCGTTCTTGCTTG  |
| chr1 | 11298408 | 11298447 | MTOR_47  | - | CCAGACAGAAGGAATCTAGGGGAGTTAAGGAGCTTAGGACAGATCGGAAGAGCGGTTACAGCAGGAATGCCGAGACCGATCTCGTATGCCGTTCTTGCTTG  |
| chr1 | 11300309 | 11300348 | MTOR_48  | - | ACAACGGCTCTTGCCAAGATAGTGAGAGATGCTGGAACCTAGATCGGAAGAGCGGTTACAGCAGGAATGCCGAGACCGATCTCGTATGCCGTTCTTGCTTG  |
| chr1 | 11301559 | 11301598 | MTOR_49  | - | GAAACCTGAGCTTGCCCTGTATCAGCGTAGGCTTGGCCAGATCGGAAGAGCGGTTACAGCAGGAATGCCGAGACCGATCTCGTATGCCGTTCTTGCTTG    |
| chr1 | 11303120 | 11303159 | MTOR_50  | - | CTGTTATGATTTACCTTCCACTCCATTTGGTTGGAGAGGAGATCGGAAGAGCGGTTACAGCAGGAATGCCGAGACCGATCTCGTATGCCGTTCTTGCTTG   |
| chr1 | 11307631 | 11307670 | MTOR_51  | - | CCATGGAAGACATCATTACCTACTCAGGTTAAACAGGGAAGATCGGAAGAGCGGTTACAGCAGGAATGCCGAGACCGATCTCGTATGCCGTTCTTGCTTG   |
| chr1 | 11307825 | 11307864 | MTOR_52  | - | AGAGGCCCTTCCCTCTTTTCTAAGCTCCACCTCACTAGATCGGAAGAGCGGTTACAGCAGGAATGCCGAGACCGATCTCGTATGCCGTTCTTGCTTG      |
| chr1 | 11313845 | 11313884 | MTOR_53  | - | ACGGCAGAGGGGAGTCCAGGCTCCCGTGTACCATTCTGTAGATCGGAAGAGCGGTTACAGCAGGAATGCCGAGACCGATCTCGTATGCCGTTCTTGCTTG   |
| chr1 | 11315998 | 11316037 | MTOR_54  | - | GGCTCCATTCCCACCACTAGCAAAGCACATCTCGTAGAGATCGGAAGAGCGGTTACAGCAGGAATGCCGAGACCGATCTCGTATGCCGTTCTTGCTTG     |
| chr1 | 11316939 | 11316978 | MTOR_55  | - | ACAGGGAGGACACAGCCAGGCTTGGGGAACGATGGTGTAGATCGGAAGAGCGGTTACAGCAGGAATGCCGAGACCGATCTCGTATGCCGTTCTTGCTTG    |
| chr1 | 11318491 | 11318530 | MTOR_56  | - | AGTCTCTGGTCACAAAACAACACTACCTTTGTGCCAGATCGGAAGAGCGGTTACAGCAGGAATGCCGAGACCGATCTCGTATGCCGTTCTTGCTTG       |
| chr1 | 11319254 | 11319293 | MTOR_57  | - | GATCTGGGCCAGTACTGTGGATGTGTGGCTAAATGTAGATCGGAAGAGCGGTTACAGCAGGAATGCCGAGACCGATCTCGTATGCCGTTCTTGCTTG      |
| chr3 | 30648325 | 30648364 | TGFB2_58 | - | GCTCCTCGTATAGACAGGCCCCAGCGCAGCGGATCGGAAGAGCGGTTACAGCAGGAATGCCGAGACCGATCTCGTATGCCGTTCTTGCTTG            |

|       |           |           |           |   |                                                                                                         |
|-------|-----------|-----------|-----------|---|---------------------------------------------------------------------------------------------------------|
| chr3  | 30664640  | 30664679  | TGFBR2_59 | - | GGATAATTATATCCATCTCAGAGAGCTGTTTTAAAAATTAAAGATCGGAAGAGCGGTTACAGCAGGAATGCCGAGACCGATCTCGTATGCCGTCTTCTGCTTG |
| chr3  | 30686188  | 30686227  | TGFBR2_60 | - | AGAAGATATATATAAATGATTCCAACCTGCCAGGCAGCCAGATCGGAAGAGCGGTTACAGCAGGAATGCCGAGACCGATCTCGTATGCCGTCTTCTGCTTG   |
| chr3  | 30691711  | 30691750  | TGFBR2_61 | - | GAGATTCATTGGAAGCGAGGGGAGAGGGAGAGAGAGAAAAGAGATCGGAAGAGCGGTTACAGCAGGAATGCCGAGACCGATCTCGTATGCCGTCTTCTGCTTG |
| chr3  | 30713079  | 30713118  | TGFBR2_62 | - | AACAAAACAAGGAGAGAAGGAGTTGGATGTGGTAGGTAAGAGATCGGAAGAGCGGTTACAGCAGGAATGCCGAGACCGATCTCGTATGCCGTCTTCTGCTTG  |
| chr3  | 30715546  | 30715585  | TGFBR2_63 | - | AACAGACAGTGAGGCCCATCATTTAATTCAGCTGCCTTTAGATCGGAAGAGCGGTTACAGCAGGAATGCCGAGACCGATCTCGTATGCCGTCTTCTGCTTG   |
| chr3  | 30729825  | 30729864  | TGFBR2_64 | - | AGCCAGCAACAACAGGGTCACTGAGAATGGCATGTGCAGCAGATCGGAAGAGCGGTTACAGCAGGAATGCCGAGACCGATCTCGTATGCCGTCTTCTGCTTG  |
| chr3  | 30732861  | 30732900  | TGFBR2_65 | - | AAAGAGATCCAAAGGGCACCATGATGGTGGTGCCTCCGAGATCGGAAGAGCGGTTACAGCAGGAATGCCGAGACCGATCTCGTATGCCGTCTTCTGCTTG    |
| chr5  | 112090537 | 112090576 | APC_66    | - | CCTTGGACCTATAAGGTTAAAAAGGATTTTGAATTCCTAGATCGGAAGAGCGGTTACAGCAGGAATGCCGAGACCGATCTCGTATGCCGTCTTCTGCTTG    |
| chr5  | 112101972 | 112102011 | APC_67    | - | GAACACAATATATAACATGAAATTCATAAATCTCAAGAGATCGGAAGAGCGGTTACAGCAGGAATGCCGAGACCGATCTCGTATGCCGTCTTCTGCTTG     |
| chr5  | 112102835 | 112102874 | APC_68    | - | TAGAAAACAAGTTTTATACAACAATTGCTTTAAGCAGTCTAGATCGGAAGAGCGGTTACAGCAGGAATGCCGAGACCGATCTCGTATGCCGTCTTCTGCTTG  |
| chr5  | 112111275 | 112111314 | APC_69    | - | TTTTTTAAAAAAGGTACGTTTAAACAATGCTAATAAAGAAGATCGGAAGAGCGGTTACAGCAGGAATGCCGAGACCGATCTCGTATGCCGTCTTCTGCTTG   |
| chr5  | 112116436 | 112116475 | APC_70    | - | AAATAATAAAAAAGTATCAATATCTTGATTTACGTTAATAGATCGGAAGAGCGGTTACAGCAGGAATGCCGAGACCGATCTCGTATGCCGTCTTCTGCTTG   |
| chr5  | 112128092 | 112128131 | APC_71    | - | ACAAGAACTCAATTAGTTATGTTTTTAAATAATTAAGATCGGAAGAGCGGTTACAGCAGGAATGCCGAGACCGATCTCGTATGCCGTCTTCTGCTTG       |
| chr5  | 112136925 | 112136964 | APC_72    | - | GGAGTTAACATCAGTACATGCAAAAATGGTGTAGGCTTTAGATCGGAAGAGCGGTTACAGCAGGAATGCCGAGACCGATCTCGTATGCCGTCTTCTGCTTG   |
| chr5  | 112151141 | 112151180 | APC_73    | - | AGCACATTATAGATGGTATAATTTAGACTATAGGTAATAAGATCGGAAGAGCGGTTACAGCAGGAATGCCGAGACCGATCTCGTATGCCGTCTTCTGCTTG   |
| chr5  | 112154612 | 112154651 | APC_74    | - | AATGAGTTTAGAAAACAAAATTCAGACTTTAATATCCAAAAGATCGGAAGAGCGGTTACAGCAGGAATGCCGAGACCGATCTCGTATGCCGTCTTCTGCTTG  |
| chr5  | 112157542 | 112157581 | APC_75    | - | AAATCAACATAAACCAATAGCTTTGTTATTTGAAGCAAGATCGGAAGAGCGGTTACAGCAGGAATGCCGAGACCGATCTCGTATGCCGTCTTCTGCTTG     |
| chr5  | 112162754 | 112162793 | APC_76    | - | AAGGGCAAGAGAAAAGACAATCATCTAAAATAAAAAGATCGGAAGAGCGGTTACAGCAGGAATGCCGAGACCGATCTCGTATGCCGTCTTCTGCTTG       |
| chr5  | 112163575 | 112163614 | APC_77    | - | AATACAGAATAGAGGATCATTAAACAGCAACTTTGAAGCCAGATCGGAAGAGCGGTTACAGCAGGAATGCCGAGACCGATCTCGTATGCCGTCTTCTGCTTG  |
| chr5  | 112164502 | 112164541 | APC_78    | - | ATCAATTTTAGATTAATTTATACATAAAATCATACTAGTTAGATCGGAAGAGCGGTTACAGCAGGAATGCCGAGACCGATCTCGTATGCCGTCTTCTGCTTG  |
| chr5  | 112170597 | 112170636 | APC_79    | - | ACAGAATATGGGTCACTAATTAGAGTTGGAATTTGTCTCAGATCGGAAGAGCGGTTACAGCAGGAATGCCGAGACCGATCTCGTATGCCGTCTTCTGCTTG   |
| chr5  | 112173199 | 112173238 | APC_80    | - | ATCAAGAGATCACAAAATTAAAGTCACAATGTGTATGCAGAGATCGGAAGAGCGGTTACAGCAGGAATGCCGAGACCGATCTCGTATGCCGTCTTCTGCTTG  |
| chr7  | 55086920  | 55086959  | EGFR_81   | - | CGAAGAGCTCGCTCCGGCTCTCCGATCAACTCGGACGGAGATCGGAAGAGCGGTTACAGCAGGAATGCCGAGACCGATCTCGTATGCCGTCTTCTGCTTG    |
| chr7  | 55209928  | 55209967  | EGFR_82   | - | AAGACAGATACACATGAAATACTGAAATCGAATAAGATCGGAAGAGCGGTTACAGCAGGAATGCCGAGACCGATCTCGTATGCCGTCTTCTGCTTG        |
| chr7  | 55210947  | 55210986  | EGFR_83   | - | AAAACATAAATGCGTGATTTCTCTTTTGAAGAACTCAAGAAGATCGGAAGAGCGGTTACAGCAGGAATGCCGAGACCGATCTCGTATGCCGTCTTCTGCTTG  |
| chr7  | 55214248  | 55214287  | EGFR_84   | - | ATGGAAGTCCGGTGAGCACTCTTCCAGCTCCTTAAATAGATCGGAAGAGCGGTTACAGCAGGAATGCCGAGACCGATCTCGTATGCCGTCTTCTGCTTG     |
| chr7  | 55218936  | 55218975  | EGFR_85   | - | AAAGTAATAGATGCATATCTCAGTGAAATGATGAGAACTAGATCGGAAGAGCGGTTACAGCAGGAATGCCGAGACCGATCTCGTATGCCGTCTTCTGCTTG   |
| chr7  | 55220188  | 55220227  | EGFR_86   | - | GCAAAGGTTCCCTGTGAGCTGAAGAGTGAAGGTAGGATCAAGATCGGAAGAGCGGTTACAGCAGGAATGCCGAGACCGATCTCGTATGCCGTCTTCTGCTTG  |
| chr7  | 55221653  | 55221692  | EGFR_87   | - | GAGAGGACCGTGGGCAAGTGAAGTCACTCAGCAGATCGGAAGAGCGGTTACAGCAGGAATGCCGAGACCGATCTCGTATGCCGTCTTCTGCTTG          |
| chr7  | 55223472  | 55223511  | EGFR_88   | - | GAGCATGAAAGGAAGGTGATGACGGTGGCACCAGGTGCTCAGATCGGAAGAGCGGTTACAGCAGGAATGCCGAGACCGATCTCGTATGCCGTCTTCTGCTTG  |
| chr7  | 55224175  | 55224214  | EGFR_89   | - | AAGAGAGACGTGATTCCGTTACATTTGTTGGATTAAGAAGATCGGAAGAGCGGTTACAGCAGGAATGCCGAGACCGATCTCGTATGCCGTCTTCTGCTTG    |
| chr7  | 55224401  | 55224440  | EGFR_90   | - | CAACAGGGTGATTATTGATCACAATCTCTACCAGTTAAAGATCGGAAGAGCGGTTACAGCAGGAATGCCGAGACCGATCTCGTATGCCGTCTTCTGCTTG    |
| chr7  | 55224401  | 55224440  | EGFR_91   | - | CAACAGGGTGATTATTGATCACAATCTCTACCAGTTAAAGATCGGAAGAGCGGTTACAGCAGGAATGCCGAGACCGATCTCGTATGCCGTCTTCTGCTTG    |
| chr7  | 55225305  | 55225344  | EGFR_92   | - | GATGAAAGACTTCAGACACACCAGTAGGATTTCTTTAGATCGGAAGAGCGGTTACAGCAGGAATGCCGAGACCGATCTCGTATGCCGTCTTCTGCTTG      |
| chr7  | 55227781  | 55227820  | EGFR_93   | - | GAGAGAAAATCATGTGGTGAATAATATAAAAACATGAGATCGGAAGAGCGGTTACAGCAGGAATGCCGAGACCGATCTCGTATGCCGTCTTCTGCTTG      |
| chr7  | 55229141  | 55229180  | EGFR_94   | - | AGAGTGGTACAGCAGTCACTGACAGAGCAGGGACCCGAAGATCGGAAGAGCGGTTACAGCAGGAATGCCGAGACCGATCTCGTATGCCGTCTTCTGCTTG    |
| chr7  | 55231375  | 55231414  | EGFR_95   | - | GAAGAGAAAACCCGTAGCCACCCCTGAGACATTATTGCAGATCGGAAGAGCGGTTACAGCAGGAATGCCGAGACCGATCTCGTATGCCGTCTTCTGCTTG    |
| chr7  | 55232922  | 55232961  | EGFR_96   | - | GTGGAGAAAATGTTTCATGTCATCTCTTTCTTTCTTTAGATCGGAAGAGCGGTTACAGCAGGAATGCCGAGACCGATCTCGTATGCCGTCTTCTGCTTG     |
| chr7  | 55236165  | 55236204  | EGFR_97   | - | ATAGAAAGACATTAGAAAATGACCACTAACATTTTAAATAGATCGGAAGAGCGGTTACAGCAGGAATGCCGAGACCGATCTCGTATGCCGTCTTCTGCTTG   |
| chr7  | 55237949  | 55237988  | EGFR_98   | - | ATGGACAAGTACATTCAATATTGTGAGAGCCTGGGAGCAGATCGGAAGAGCGGTTACAGCAGGAATGCCGAGACCGATCTCGTATGCCGTCTTCTGCTTG    |
| chr7  | 55238817  | 55238856  | EGFR_99   | - | TGAAAGAGAAATATACATTTTTCTCATTCTTTGGAGATCGGAAGAGCGGTTACAGCAGGAATGCCGAGACCGATCTCGTATGCCGTCTTCTGCTTG        |
| chr7  | 55240625  | 55240664  | EGFR_100  | - | GTGGAGGAACAAGGAAGGGTGAAGTGGTCTGACAGATCCAAGATCGGAAGAGCGGTTACAGCAGGAATGCCGAGACCGATCTCGTATGCCGTCTTCTGCTTG  |
| chr7  | 55241563  | 55241602  | EGFR_101  | - | CAAGAACAACAGAGACAAGGGTCACTCAGCCCTACCATGAGATCGGAAGAGCGGTTACAGCAGGAATGCCGAGACCGATCTCGTATGCCGTCTTCTGCTTG   |
| chr7  | 55242364  | 55242403  | EGFR_102  | - | GAGAGAAGGAAGACGTTAATCGGCAATTGTGAGATGGTGCAGATCGGAAGAGCGGTTACAGCAGGAATGCCGAGACCGATCTCGTATGCCGTCTTCTGCTTG  |
| chr7  | 55248935  | 55248974  | EGFR_103  | - | GGAGAGGACAGTCACTGTGGCTTCGCATGGTGGCCAGAAGAGATCGGAAGAGCGGTTACAGCAGGAATGCCGAGACCGATCTCGTATGCCGTCTTCTGCTTG  |
| chr7  | 55259361  | 55259400  | EGFR_104  | - | GAAGACCTGCTGTGAGGACAGATCATCATGGAAGAAGAGATCGGAAGAGCGGTTACAGCAGGAATGCCGAGACCGATCTCGTATGCCGTCTTCTGCTTG     |
| chr7  | 55260408  | 55260447  | EGFR_105  | - | TGAGAGATGAGGCAGTGAGACAATATTAGTTTCCCTCTGAGATCGGAAGAGCGGTTACAGCAGGAATGCCGAGACCGATCTCGTATGCCGTCTTCTGCTTG   |
| chr7  | 55266359  | 55266398  | EGFR_106  | - | GAAGCAAGAAAAGAGGCAGTGGGATCATGAATGAACAATAGATCGGAAGAGCGGTTACAGCAGGAATGCCGAGACCGATCTCGTATGCCGTCTTCTGCTTG   |
| chr7  | 55267958  | 55267997  | EGFR_107  | - | AATGAGAAAACAGTGCAATTAGAACACTGGAAGAAATGAGATCGGAAGAGCGGTTACAGCAGGAATGCCGAGACCGATCTCGTATGCCGTCTTCTGCTTG    |
| chr7  | 55268830  | 55268869  | EGFR_108  | - | GATTTTGAAGCTATTAGAATGGCCCTGAGAGATGCTATTCAGATCGGAAGAGCGGTTACAGCAGGAATGCCGAGACCGATCTCGTATGCCGTCTTCTGCTTG  |
| chr7  | 55269377  | 55269416  | EGFR_109  | - | AACAGAGAAGTTGCCATGGAATGCTTTACCACATCTCAAGATCGGAAGAGCGGTTACAGCAGGAATGCCGAGACCGATCTCGTATGCCGTCTTCTGCTTG    |
| chr7  | 55270159  | 55270198  | EGFR_110  | - | AAATGAGGAAGTTACTCCGGTACGGCTGCCCAACTTAGATCGGAAGAGCGGTTACAGCAGGAATGCCGAGACCGATCTCGTATGCCGTCTTCTGCTTG      |
| chr7  | 55272898  | 55272937  | EGFR_111  | - | AAAGAAATCAGAGGTGAAGTAATCAGCAAAAGCACCATCCAGATCGGAAGAGCGGTTACAGCAGGAATGCCGAGACCGATCTCGTATGCCGTCTTCTGCTTG  |
| chr12 | 25362678  | 25362717  | KRAS_112  | - | TACTTTTTCTTAAGGCATACTAGTACAAGTGGTAATTTAGATCGGAAGAGCGGTTACAGCAGGAATGCCGAGACCGATCTCGTATGCCGTCTTCTGCTTG    |
| chr12 | 25368324  | 25368363  | KRAS_113  | - | TTAAGTTCAGCACATTAATTTTGCAGAAAAGCAGATGTCTAGATCGGAAGAGCGGTTACAGCAGGAATGCCGAGACCGATCTCGTATGCCGTCTTCTGCTTG  |
| chr12 | 25378497  | 25378536  | KRAS_114  | - | CTGAAATAAATACAGATCTGTTTTCTGCAAAATCATAACTAGATCGGAAGAGCGGTTACAGCAGGAATGCCGAGACCGATCTCGTATGCCGTCTTCTGCTTG  |
| chr12 | 25380117  | 25380156  | KRAS_115  | - | ATTGAAATATAACTGACATTAAGGAGTAATTTAGATCGGAAGAGCGGTTACAGCAGGAATGCCGAGACCGATCTCGTATGCCGTCTTCTGCTTG          |
| chr12 | 25398157  | 25398196  | KRAS_116  | - | TTTTAATATGCATATTACTGGTGCAGGACACTTTTGTAGATCGGAAGAGCGGTTACAGCAGGAATGCCGAGACCGATCTCGTATGCCGTCTTCTGCTTG     |

|       |           |           |           |   |                                                                                                          |
|-------|-----------|-----------|-----------|---|----------------------------------------------------------------------------------------------------------|
| chr14 | 103852316 | 103852355 | MARK3_117 | - | TTTAATCTGCACAATGCGAGGGTCAAACAAAACAGCACAGATCGGAAGAGCGGTTACAGCAGGAATGCCGAGACCGATCTCGTATGCCGTCTTCTGCTTG     |
| chr14 | 103871362 | 103871401 | MARK3_118 | - | GCATACACAAAGATAAGGAAATGAGAGAACACAGAGTACTAGATCGGAAGAGCGGTTACAGCAGGAATGCCGAGACCGATCTCGTATGCCGTCTTCTGCTTG   |
| chr14 | 103894673 | 103894712 | MARK3_119 | - | TAATAAATATTTATGGATTTAAGAATTTAGTAATTATGGAGATCGGAAGAGCGGTTACAGCAGGAATGCCGAGACCGATCTCGTATGCCGTCTTCTGCTTG    |
| chr14 | 103915205 | 103915244 | MARK3_120 | - | AAACAAAACAAAACACATAATCCCCAACACAAGTTATTAAGATCGGAAGAGCGGTTACAGCAGGAATGCCGAGACCGATCTCGTATGCCGTCTTCTGCTTG    |
| chr14 | 103918204 | 103918243 | MARK3_121 | - | GGAGAGGACACGGAAGAAAAAGAGACAATGTCTGTATGCAGATCGGAAGAGCGGTTACAGCAGGAATGCCGAGACCGATCTCGTATGCCGTCTTCTGCTTG    |
| chr14 | 103923428 | 103923467 | MARK3_122 | - | GAGAAATAAAGTAAAGTAGAAATCTACTTCTGAGTATTAAGATCGGAAGAGCGGTTACAGCAGGAATGCCGAGACCGATCTCGTATGCCGTCTTCTGCTTG    |
| chr14 | 103928691 | 103928730 | MARK3_123 | - | GAGACGCAGATGCAGTCACTCACTGTCAGATTCGAATTAGATCGGAAGAGCGGTTACAGCAGGAATGCCGAGACCGATCTCGTATGCCGTCTTCTGCTTG     |
| chr14 | 103931843 | 103931882 | MARK3_124 | - | AACATCAAGACAAAAATGAAATTTAGCCAAAATAGAAATTAAGATCGGAAGAGCGGTTACAGCAGGAATGCCGAGACCGATCTCGTATGCCGTCTTCTGCTTG  |
| chr14 | 103932258 | 103932297 | MARK3_125 | - | GTACAGAGGAAAGAAAACGAGTAAGTCAACCTTTAGGTTTATAGATCGGAAGAGCGGTTACAGCAGGAATGCCGAGACCGATCTCGTATGCCGTCTTCTGCTTG |
| chr14 | 103932629 | 103932668 | MARK3_126 | - | TAAACTGTTCATTAGCAGAGTAAATGAAATATTCTGATAAGATCGGAAGAGCGGTTACAGCAGGAATGCCGAGACCGATCTCGTATGCCGTCTTCTGCTTG    |
| chr14 | 103933365 | 103933404 | MARK3_127 | - | GGCATAATACAGTTTATGTGTTTTGTTGGTAAAGAAATCAGATCGGAAGAGCGGTTACAGCAGGAATGCCGAGACCGATCTCGTATGCCGTCTTCTGCTTG    |
| chr14 | 103934319 | 103934358 | MARK3_128 | - | ATGAGAAAACAGAGCAAAACCAACACAGAAACCAATGGAGATCGGAAGAGCGGTTACAGCAGGAATGCCGAGACCGATCTCGTATGCCGTCTTCTGCTTG     |
| chr14 | 103941279 | 103941318 | MARK3_129 | - | GAGTTCATTTTTAATAGCTGAATATAGTTTTCAAGTTTTAGATCGGAAGAGCGGTTACAGCAGGAATGCCGAGACCGATCTCGTATGCCGTCTTCTGCTTG    |
| chr14 | 103946673 | 103946712 | MARK3_130 | - | GGGCATTTTTGTCTTAAATTTATTTGGTAAATACAGTACAAGATCGGAAGAGCGGTTACAGCAGGAATGCCGAGACCGATCTCGTATGCCGTCTTCTGCTTG   |
| chr14 | 103958063 | 103958102 | MARK3_131 | - | AGAAAGTAAAGAGCTCTCAGAACATGATATACAAAATTTAGATCGGAAGAGCGGTTACAGCAGGAATGCCGAGACCGATCTCGTATGCCGTCTTCTGCTTG    |
| chr14 | 103964788 | 103964827 | MARK3_132 | - | TTAAGTAAAAAATAAATAAATAAACAATAAATCTCGAAGATCGGAAGAGCGGTTACAGCAGGAATGCCGAGACCGATCTCGTATGCCGTCTTCTGCTTG      |
| chr14 | 103966442 | 103966481 | MARK3_133 | - | AGAATGTAGAAGCAGAGAGAGGAAAGGAAAGAAAAGATAAGATCGGAAGAGCGGTTACAGCAGGAATGCCGAGACCGATCTCGTATGCCGTCTTCTGCTTG    |
| chr14 | 103969168 | 103969207 | MARK3_134 | - | TAGAGGCGAGTTTATTTAATCGTACAGGAAATCAACCAATCGGAAGAGCGGTTACAGCAGGAATGCCGAGACCGATCTCGTATGCCGTCTTCTGCTTG       |
| chr14 | 105236627 | 105236666 | AKT1_135  | - | GACTGCGCTGGACGATAGCTTGGAGGGATGGAGAGCGGCAGATCGGAAGAGCGGTTACAGCAGGAATGCCGAGACCGATCTCGTATGCCGTCTTCTGCTTG    |
| chr14 | 105237031 | 105237070 | AKT1_136  | - | ACTGCCTGCCCCCGCCACTCCCTTTCTCTCCACTCAAGATCGGAAGAGCGGTTACAGCAGGAATGCCGAGACCGATCTCGTATGCCGTCTTCTGCTTG       |
| chr14 | 105238651 | 105238690 | AKT1_137  | - | TCCCGCATATTCACGCGCACGCATGCTCCCCACATATCCAGATCGGAAGAGCGGTTACAGCAGGAATGCCGAGACCGATCTCGTATGCCGTCTTCTGCTTG    |
| chr14 | 105239164 | 105239203 | AKT1_138  | - | CCCATCCCAGCTACAGGCTACACCTCCATCCCCTCATCCCAGATCGGAAGAGCGGTTACAGCAGGAATGCCGAGACCGATCTCGTATGCCGTCTTCTGCTTG   |
| chr14 | 105239537 | 105239576 | AKT1_139  | - | CACCTGCGTGCATACGCTTGTGCTGCTCCCACGCTCTGAAGATCGGAAGAGCGGTTACAGCAGGAATGCCGAGACCGATCTCGTATGCCGTCTTCTGCTTG    |
| chr14 | 105239741 | 105239780 | AKT1_140  | - | GGGAGGCAGGGGGGCGAGGCTGGGGCCGCTGGCGGCACAGATCGGAAGAGCGGTTACAGCAGGAATGCCGAGACCGATCTCGTATGCCGTCTTCTGCTTG     |
| chr14 | 105240198 | 105240237 | AKT1_141  | - | GGGCTGCGGGGGATGGACTTCGCGGCCTGTGGGCCGCCAAGATCGGAAGAGCGGTTACAGCAGGAATGCCGAGACCGATCTCGTATGCCGTCTTCTGCTTG    |
| chr14 | 105241224 | 105241263 | AKT1_142  | - | GCCCAGATGGGCTGAAGGGCTGGGGCCAGTAGCGACTCAGATCGGAAGAGCGGTTACAGCAGGAATGCCGAGACCGATCTCGTATGCCGTCTTCTGCTTG     |
| chr14 | 105241362 | 105241401 | AKT1_143  | - | GGCGGTGGGGCAGGGTGGAGATGAGGGTGCGGGTGGCAGAGATCGGAAGAGCGGTTACAGCAGGAATGCCGAGACCGATCTCGTATGCCGTCTTCTGCTTG    |
| chr14 | 105241938 | 105241977 | AKT1_144  | - | TCCCCACTTGCCTGTGCTGGGGCTGCCTTGGACTGTGAGATCGGAAGAGCGGTTACAGCAGGAATGCCGAGACCGATCTCGTATGCCGTCTTCTGCTTG      |
| chr14 | 105242945 | 105242984 | AKT1_145  | - | TGTGGCGCCAGGCCAGGCACTTGGCCAGCCCGCCGCTTAGATCGGAAGAGCGGTTACAGCAGGAATGCCGAGACCGATCTCGTATGCCGTCTTCTGCTTG     |
| chr14 | 105246374 | 105246413 | AKT1_146  | - | CCTTGGCCTCTCGGATTCAGATTTGGGGGCTTGGCTGGAAGATCGGAAGAGCGGTTACAGCAGGAATGCCGAGACCGATCTCGTATGCCGTCTTCTGCTTG    |
| chr14 | 105258884 | 105258923 | AKT1_147  | - | GCTGCCAGGGCTGGGCCTGGGGAGGAGAGATGGGGGTAGAGATCGGAAGAGCGGTTACAGCAGGAATGCCGAGACCGATCTCGTATGCCGTCTTCTGCTTG    |
| chr17 | 7572876   | 7572915   | TP53_148  | - | TTCTTGTCCCCACTGACAGCCTCCACCCCATCTCTCCAGATCGGAAGAGCGGTTACAGCAGGAATGCCGAGACCGATCTCGTATGCCGTCTTCTGCTTG      |
| chr17 | 7573876   | 7573915   | TP53_149  | - | TCAGCCCCCTTCTGGCCCTACTCCCTGCCTTCTTAGTTAGATCGGAAGAGCGGTTACAGCAGGAATGCCGAGACCGATCTCGTATGCCGTCTTCTGCTTG     |
| chr17 | 7576486   | 7576525   | TP53_150  | - | TTGTAAGTTGAAAGAGGATTAATACACCTAATCTAAGGAATCGGAAGAGCGGTTACAGCAGGAATGCCGAGACCGATCTCGTATGCCGTCTTCTGCTTG      |
| chr17 | 7576574   | 7576613   | TP53_151  | - | AAAATGGTTCTATGACTTTGCTGATACAGATGCTACTTTGAGATCGGAAGAGCGGTTACAGCAGGAATGCCGAGACCGATCTCGTATGCCGTCTTCTGCTTG   |
| chr17 | 7576802   | 7576841   | TP53_152  | - | TTGGGACCTCTTATCAAGTGGAAAGTTTCCAGTCTAACACAGATCGGAAGAGCGGTTACAGCAGGAATGCCGAGACCGATCTCGTATGCCGTCTTCTGCTTG   |
| chr17 | 7576968   | 7577007   | TP53_153  | - | AGGACAAGAAGCGGTGGAGGAGACCAAGGTTGACGTTATGAGATCGGAAGAGCGGTTACAGCAGGAATGCCGAGACCGATCTCGTATGCCGTCTTCTGCTTG   |
| chr17 | 7577448   | 7577487   | TP53_154  | - | ACTTGCCACCTGCACACTGGCCTGCTGTGCCAGCCTCAGATCGGAAGAGCGGTTACAGCAGGAATGCCGAGACCGATCTCGTATGCCGTCTTCTGCTTG      |
| chr17 | 7578126   | 7578165   | TP53_155  | - | CAACTGGGGTCTCTGGGAGGAGGGGTTAAGGGTGGTGTGATCGGAAGAGCGGTTACAGCAGGAATGCCGAGACCGATCTCGTATGCCGTCTTCTGCTTG      |
| chr17 | 7578320   | 7578359   | TP53_156  | - | GGGGCTGGAGAGACGACAGGGCTGGTGGCCAGGCTCCCAGATCGGAAGAGCGGTTACAGCAGGAATGCCGAGACCGATCTCGTATGCCGTCTTCTGCTTG     |
| chr17 | 7579261   | 7579300   | TP53_157  | - | CTGAGGGCTGGCCTTCAATGACTTCAATGCCTGGCCGTAGATCGGAAGAGCGGTTACAGCAGGAATGCCGAGACCGATCTCGTATGCCGTCTTCTGCTTG     |
| chr17 | 7579649   | 7579688   | TP53_158  | - | GGGTTGGGCTGGGACCTGGAGGGCTGGGGACCTGGAGGGAGATCGGAAGAGCGGTTACAGCAGGAATGCCGAGACCGATCTCGTATGCCGTCTTCTGCTTG    |
| chr17 | 7579788   | 7579827   | TP53_159  | - | CCATTGGAAGGGCAGGCCACCACCCCAACCCCAAGATCGGAAGAGCGGTTACAGCAGGAATGCCGAGACCGATCTCGTATGCCGTCTTCTGCTTG          |
| chr18 | 48573366  | 48573405  | SMAD4_160 | - | TTTTCTTTAAATCAAATATGTCTCCAATTTCTGAAGCAAGATCGGAAGAGCGGTTACAGCAGGAATGCCGAGACCGATCTCGTATGCCGTCTTCTGCTTG     |
| chr18 | 48575005  | 48575044  | SMAD4_161 | - | AAACGACATTTATCATGTACATATTCGAAGACATAGATCGGAAGAGCGGTTACAGCAGGAATGCCGAGACCGATCTCGTATGCCGTCTTCTGCTTG         |
| chr18 | 48575614  | 48575653  | SMAD4_162 | - | TAAGGGGAAAACAAATGAACATTAATCAATGAAAGATCGGAAGAGCGGTTACAGCAGGAATGCCGAGACCGATCTCGTATGCCGTCTTCTGCTTG          |
| chr18 | 48581100  | 48581139  | SMAD4_163 | - | AATTAACATATTTAAATTTTTATAAGCTTCTATTCCCAAGATCGGAAGAGCGGTTACAGCAGGAATGCCGAGACCGATCTCGTATGCCGTCTTCTGCTTG     |
| chr18 | 48584444  | 48584483  | SMAD4_164 | - | AAGAAGACATTAACATGGTACATTCATAGATGTCATCTTAAGATCGGAAGAGCGGTTACAGCAGGAATGCCGAGACCGATCTCGTATGCCGTCTTCTGCTTG   |
| chr18 | 48584659  | 48584698  | SMAD4_165 | - | AGGCCACATGGGTTAATTTGCTTTTTATAAAGGCTGCCTAAGATCGGAAGAGCGGTTACAGCAGGAATGCCGAGACCGATCTCGTATGCCGTCTTCTGCTTG   |
| chr18 | 48586185  | 48586224  | SMAD4_166 | - | GACAAACAAAATTCATTTTTATTACTAAAGTTGTCTAAGATCGGAAGAGCGGTTACAGCAGGAATGCCGAGACCGATCTCGTATGCCGTCTTCTGCTTG      |
| chr18 | 48591742  | 48591781  | SMAD4_167 | - | TAAATGGGAAAGAACATCTCCCATGAGAAGATATAAGGAGATCGGAAGAGCGGTTACAGCAGGAATGCCGAGACCGATCTCGTATGCCGTCTTCTGCTTG     |
| chr18 | 48593338  | 48593377  | SMAD4_168 | - | AAAAGGAAATTCATTTTATCTTTGATAAGTATTTAAATGATCGGAAGAGCGGTTACAGCAGGAATGCCGAGACCGATCTCGTATGCCGTCTTCTGCTTG      |
| chr18 | 48602957  | 48602996  | SMAD4_169 | - | AAAACATTTACTACTAGATTCATAAAGAAAATTCATAGATCGGAAGAGCGGTTACAGCAGGAATGCCGAGACCGATCTCGTATGCCGTCTTCTGCTTG       |
| chr18 | 48604575  | 48604614  | SMAD4_170 | - | AGATTTGGAAGACATCAGAGGGACAGGGTATCTTCCCAGATCGGAAGAGCGGTTACAGCAGGAATGCCGAGACCGATCTCGTATGCCGTCTTCTGCTTG      |
| chr19 | 40739728  | 40739767  | AKT2_171  | - | CACCCAGAGGACGCACCTCGCTGCCATCACCCTGGGTGAGATCGGAAGAGCGGTTACAGCAGGAATGCCGAGACCGATCTCGTATGCCGTCTTCTGCTTG     |
| chr19 | 40740901  | 40740940  | AKT2_172  | - | GGGGCCCCCGCCTGGTGTGCCTGCCACAGGGGTGGAGGAGATCGGAAGAGCGGTTACAGCAGGAATGCCGAGACCGATCTCGTATGCCGTCTTCTGCTTG     |
| chr19 | 40741119  | 40741158  | AKT2_173  | - | CTGCTTGGCCACAGCAGGACCTCAGGACCTGGCCACTCAGATCGGAAGAGCGGTTACAGCAGGAATGCCGAGACCGATCTCGTATGCCGTCTTCTGCTTG     |
| chr19 | 40741746  | 40741785  | AKT2_174  | - | GCGTGGCCCCACAGCCAGCCGCTGCTGCCACTGAGATCGGAAGAGCGGTTACAGCAGGAATGCCGAGACCGATCTCGTATGCCGTCTTCTGCTTG          |

|       |          |          |          |   |                                                                                                         |
|-------|----------|----------|----------|---|---------------------------------------------------------------------------------------------------------|
| chr19 | 40742113 | 40742152 | AKT2_175 | - | TTGGTGGGGGTAGGAACGTGTGAGGCCAAGGGTAGGGGGAAGATCGGAAGAGCGGTTACAGCAGGAATGCCGAGACCGATCTCGTATGCCGCTTCTGCTTG   |
| chr19 | 40743825 | 40743864 | AKT2_176 | - | GGGTGTGCGCCAGGCTGACCTGTGGCATGCACACCACATGAGATCGGAAGAGCGGTTACAGCAGGAATGCCGAGACCGATCTCGTATGCCGCTTCTGCTTG   |
| chr19 | 40744761 | 40744800 | AKT2_177 | - | GCTGCCTTGACTTTGCCCTCTGGGGCCCTCTTCTTTAGGGAGATCGGAAGAGCGGTTACAGCAGGAATGCCGAGACCGATCTCGTATGCCGCTTCTGCTTG   |
| chr19 | 40745901 | 40745940 | AKT2_178 | - | CTCCCCTCCCAGACAGTGTGAGGCCAGCCTTTGGACAGAAGATCGGAAGAGCGGTTACAGCAGGAATGCCGAGACCGATCTCGTATGCCGCTTCTGCTTG    |
| chr19 | 40747794 | 40747833 | AKT2_179 | - | CGGGAATTGCGCTCCCGAGCCTCTGTGGGGGCTGCGGTCTAGATCGGAAGAGCGGTTACAGCAGGAATGCCGAGACCGATCTCGTATGCCGCTTCTGCTTG   |
| chr19 | 40748390 | 40748429 | AKT2_180 | - | GGAGCAGGGGTGGGGCTGCCAGCCTGCGGTGCCCCACAGATCGGAAGAGCGGTTACAGCAGGAATGCCGAGACCGATCTCGTATGCCGCTTCTGCTTG      |
| chr19 | 40761014 | 40761053 | AKT2_181 | - | GCCTCTGTGTGGCTGCCCTTGAGAGGGAGCAAGCCTGGTGAGATCGGAAGAGCGGTTACAGCAGGAATGCCGAGACCGATCTCGTATGCCGCTTCTGCTTG   |
| chr19 | 40762782 | 40762821 | AKT2_182 | - | GGATGAGTGGGTCAAGTGTCTGGTGTCTCACAGGATGGCTGAGATCGGAAGAGCGGTTACAGCAGGAATGCCGAGACCGATCTCGTATGCCGCTTCTGCTTG  |
| chr19 | 40771078 | 40771117 | AKT2_183 | - | GCTTTTGCCCGCCAGATCTTTCTCCCAGCTGGCTCCTCAGATCGGAAGAGCGGTTACAGCAGGAATGCCGAGACCGATCTCGTATGCCGCTTCTGCTTG     |
| chr1  | 11167567 | 11167606 | MTOR_184 | + | AGAAAGAAAAGGAATATTTAATAATTTGAGCTTCTTCAAAGATCGGAAGAGCGGTTACAGCAGGAATGCCGAGACCGATCTCGTATGCCGCTTCTGCTTG    |
| chr1  | 11168353 | 11168392 | MTOR_185 | + | AGGAACA AAAACATTTCACTCTCTTCCCTGGCAATCGATGCAGATCGGAAGAGCGGTTACAGCAGGAATGCCGAGACCGATCTCGTATGCCGCTTCTGCTTG |
| chr1  | 11169437 | 11169476 | MTOR_186 | + | CAAAAAGTAGAAATACTGTAAGAATGGGAGCAATAACAACAAGATCGGAAGAGCGGTTACAGCAGGAATGCCGAGACCGATCTCGTATGCCGCTTCTGCTTG  |
| chr1  | 11169796 | 11169835 | MTOR_187 | + | AGAAATCAATTACAGAAAATTCAAACGCCAAAAGCCACAGATCGGAAGAGCGGTTACAGCAGGAATGCCGAGACCGATCTCGTATGCCGCTTCTGCTTG     |
| chr1  | 11172984 | 11173023 | MTOR_188 | + | AAATAAAGAGTATTGAAACATGCTTCAAATTTGACTTGAAGATCGGAAGAGCGGTTACAGCAGGAATGCCGAGACCGATCTCGTATGCCGCTTCTGCTTG    |
| chr1  | 11174520 | 11174559 | MTOR_189 | + | GACAGAGCCACTCACACAGGATTTACTAATCTCCACCCAGATCGGAAGAGCGGTTACAGCAGGAATGCCGAGACCGATCTCGTATGCCGCTTCTGCTTG     |
| chr1  | 11174954 | 11174993 | MTOR_190 | + | ATAAATGGGAAAAGCCAAATCAATGTTATTTTCTTTACAGATCGGAAGAGCGGTTACAGCAGGAATGCCGAGACCGATCTCGTATGCCGCTTCTGCTTG     |
| chr1  | 11175535 | 11175574 | MTOR_191 | + | CAGAAGACAGATCAGGGAGGGATCAACAGAGATAACGGATAGATCGGAAGAGCGGTTACAGCAGGAATGCCGAGACCGATCTCGTATGCCGCTTCTGCTTG   |
| chr1  | 11177153 | 11177192 | MTOR_192 | + | GGAGTGCATGTGAAGTACGTTCTGGAAACTTAAATTTCAAAGATCGGAAGAGCGGTTACAGCAGGAATGCCGAGACCGATCTCGTATGCCGCTTCTGCTTG   |
| chr1  | 11181435 | 11181474 | MTOR_193 | + | ACACAACGTTCAGTAAGAGAGCAGCCTAAGACATGTAGTAGATCGGAAGAGCGGTTACAGCAGGAATGCCGAGACCGATCTCGTATGCCGCTTCTGCTTG    |
| chr1  | 11182193 | 11182232 | MTOR_194 | + | CAGAAAAGCAGGGTTAGTGTACCGTAAAGAGAGTATACCCAGATCGGAAGAGCGGTTACAGCAGGAATGCCGAGACCGATCTCGTATGCCGCTTCTGCTTG   |
| chr1  | 11184700 | 11184739 | MTOR_195 | + | CAGTGGGAGCGGTGAGTGTACATCAGAGGTCCTCAGCTCTAGATCGGAAGAGCGGTTACAGCAGGAATGCCGAGACCGATCTCGTATGCCGCTTCTGCTTG   |
| chr1  | 11186863 | 11186902 | MTOR_196 | + | TTACCAAAGGATTTAGTGTCTGCCTCCAGGGAAAGAATTTAGATCGGAAGAGCGGTTACAGCAGGAATGCCGAGACCGATCTCGTATGCCGCTTCTGCTTG   |
| chr1  | 11187211 | 11187250 | MTOR_197 | + | AAGCAGGCAGGTTTTCAAGTTATCAAAGTCTCAACCACAGATCGGAAGAGCGGTTACAGCAGGAATGCCGAGACCGATCTCGTATGCCGCTTCTGCTTG     |
| chr1  | 11187873 | 11187912 | MTOR_198 | + | GAGAAGAAGGAGAGAAGCATCAAGAATCAGCTCAACCTCAGAGATCGGAAGAGCGGTTACAGCAGGAATGCCGAGACCGATCTCGTATGCCGCTTCTGCTTG  |
| chr1  | 11188193 | 11188232 | MTOR_199 | + | AACAGAAGAAACATCTATAAAGGAAATGTGGGTTGGGAAAGATCGGAAGAGCGGTTACAGCAGGAATGCCGAGACCGATCTCGTATGCCGCTTCTGCTTG    |
| chr1  | 11188619 | 11188658 | MTOR_200 | + | AAAAGACACAGTATGTAGCATATGAGACTTGAACAACCTAAGATCGGAAGAGCGGTTACAGCAGGAATGCCGAGACCGATCTCGTATGCCGCTTCTGCTTG   |
| chr1  | 11189018 | 11189057 | MTOR_201 | + | AATGAGAAAAGTCACAGAAAATTTAGTTTCCAGTTTTTGCAGATCGGAAGAGCGGTTACAGCAGGAATGCCGAGACCGATCTCGTATGCCGCTTCTGCTTG   |
| chr1  | 11189905 | 11189944 | MTOR_202 | + | ACACACGTGTAGCGACACTCTTGCTCTGCTTCTCATCAGATCGGAAGAGCGGTTACAGCAGGAATGCCGAGACCGATCTCGTATGCCGCTTCTGCTTG      |
| chr1  | 11190844 | 11190883 | MTOR_203 | + | AGAAAGGCAAAGCAGACACTGGAGCTGTGACCAACAGCAAGATCGGAAGAGCGGTTACAGCAGGAATGCCGAGACCGATCTCGTATGCCGCTTCTGCTTG    |
| chr1  | 11193264 | 11193303 | MTOR_204 | + | AGAAAACAAGCCCCATGACATTCCTCCCTCAAACAGCCAGATCGGAAGAGCGGTTACAGCAGGAATGCCGAGACCGATCTCGTATGCCGCTTCTGCTTG     |
| chr1  | 11194533 | 11194572 | MTOR_205 | + | ACAAAAGGCACAGAGACCCACTTGGCTTGTGGCCAGCTTTCAGATCGGAAGAGCGGTTACAGCAGGAATGCCGAGACCGATCTCGTATGCCGCTTCTGCTTG  |
| chr1  | 11195502 | 11195541 | MTOR_206 | + | AGAGAAACTGGGTTATAGACAGAAGTGGACAGCCAGGGAAGATCGGAAGAGCGGTTACAGCAGGAATGCCGAGACCGATCTCGTATGCCGCTTCTGCTTG    |
| chr1  | 11199725 | 11199764 | MTOR_207 | + | CAGAAGTGAAGATTAGATATGCTTCTGATACATTTTGTAGATCGGAAGAGCGGTTACAGCAGGAATGCCGAGACCGATCTCGTATGCCGCTTCTGCTTG     |
| chr1  | 11204822 | 11204861 | MTOR_208 | + | CAAATCGCATTCCAACTAATTCACGCAACATCAAAGATCGGAAGAGCGGTTACAGCAGGAATGCCGAGACCGATCTCGTATGCCGCTTCTGCTTG         |
| chr1  | 11205112 | 11205151 | MTOR_209 | + | AACAACCTTGGGACTGAGCTCTGCACTTGGAGCTTAGGAGATCGGAAGAGCGGTTACAGCAGGAATGCCGAGACCGATCTCGTATGCCGCTTCTGCTTG     |
| chr1  | 11206858 | 11206897 | MTOR_210 | + | ACACATAGACAGAAAGCATCAAGGGGTTGGCTGTTGGGAGATCGGAAGAGCGGTTACAGCAGGAATGCCGAGACCGATCTCGTATGCCGCTTCTGCTTG     |
| chr1  | 11210293 | 11210332 | MTOR_211 | + | TGAATTATATAGTCAGATTAATCCAATCTCCTTAACTAAGATCGGAAGAGCGGTTACAGCAGGAATGCCGAGACCGATCTCGTATGCCGCTTCTGCTTG     |
| chr1  | 11217358 | 11217397 | MTOR_212 | + | GGAAAAGAAAGACTGCTGTGAGGTACACAGAAGAAGGATCAGATCGGAAGAGCGGTTACAGCAGGAATGCCGAGACCGATCTCGTATGCCGCTTCTGCTTG   |
| chr1  | 11227584 | 11227623 | MTOR_213 | + | AAAGGGAAAAGGTAGTTACACTCAACAGCTCTGAGGGTAGAGATCGGAAGAGCGGTTACAGCAGGAATGCCGAGACCGATCTCGTATGCCGCTTCTGCTTG   |
| chr1  | 11259470 | 11259509 | MTOR_214 | + | GCAAAACCTCACAGCAGGAAAATGCCAGATGGGCGACAAGATCGGAAGAGCGGTTACAGCAGGAATGCCGAGACCGATCTCGTATGCCGCTTCTGCTTG     |
| chr1  | 11259770 | 11259809 | MTOR_215 | + | AGAAGGTGGAAAATGGAGAGACTCCCGTGCCTCTGCCTCAGATCGGAAGAGCGGTTACAGCAGGAATGCCGAGACCGATCTCGTATGCCGCTTCTGCTTG    |
| chr1  | 11264770 | 11264809 | MTOR_216 | + | ACAGGTGACAATGGAAAACAATCAGTTTCAAGGGCCAATTAGATCGGAAGAGCGGTTACAGCAGGAATGCCGAGACCGATCTCGTATGCCGCTTCTGCTTG   |
| chr1  | 11269525 | 11269564 | MTOR_217 | + | AGATTTATAGGAAACACCTATAACTCTACTAGATGCTTCTAGATCGGAAGAGCGGTTACAGCAGGAATGCCGAGACCGATCTCGTATGCCGCTTCTGCTTG   |
| chr1  | 11270973 | 11271012 | MTOR_218 | + | AGGGGGAAAGAGATGAGAAAATATCATTTTGGAGAGTGGAGAGATCGGAAGAGCGGTTACAGCAGGAATGCCGAGACCGATCTCGTATGCCGCTTCTGCTTG  |
| chr1  | 11272541 | 11272580 | MTOR_219 | + | CACTAACATACAGTAATCTGTAACATACAATCTCCAAGGAAGATCGGAAGAGCGGTTACAGCAGGAATGCCGAGACCGATCTCGTATGCCGCTTCTGCTTG   |
| chr1  | 11272975 | 11273014 | MTOR_220 | + | GAGCAAAAAGCATGGTGATGACAGTGCAGTCCCAAGTATCAGATCGGAAGAGCGGTTACAGCAGGAATGCCGAGACCGATCTCGTATGCCGCTTCTGCTTG   |
| chr1  | 11273633 | 11273672 | MTOR_221 | + | AGAAAAGTCAGAGGAGCTGAGTCAAGTCCCTTCTGATGAAGATCGGAAGAGCGGTTACAGCAGGAATGCCGAGACCGATCTCGTATGCCGCTTCTGCTTG    |
| chr1  | 11276301 | 11276340 | MTOR_222 | + | CAAGAGGTCAACCAGCTGGTATCATGAAGGACATTGAACCAGATCGGAAGAGCGGTTACAGCAGGAATGCCGAGACCGATCTCGTATGCCGCTTCTGCTTG   |
| chr1  | 11288985 | 11289024 | MTOR_223 | + | ACAACAGAGAGTGTAGAGCTACACATGGCATGACGTGACAGATCGGAAGAGCGGTTACAGCAGGAATGCCGAGACCGATCTCGTATGCCGCTTCTGCTTG    |
| chr1  | 11291121 | 11291160 | MTOR_224 | + | AAGGGGAGGGGAAAAAGAAAACATTCATCACAACATGATTAGATCGGAAGAGCGGTTACAGCAGGAATGCCGAGACCGATCTCGTATGCCGCTTCTGCTTG   |
| chr1  | 11291501 | 11291540 | MTOR_225 | + | ACAAGAACCGATTCAATGAGCCAGTAGCAGAGAAAAGATCGGAAGAGCGGTTACAGCAGGAATGCCGAGACCGATCTCGTATGCCGCTTCTGCTTG        |
| chr1  | 11292595 | 11292634 | MTOR_226 | + | AAAAGAGGCTGGCAGAAAGGCTAGCAATTTCTGCATTTGGAGATCGGAAGAGCGGTTACAGCAGGAATGCCGAGACCGATCTCGTATGCCGCTTCTGCTTG   |
| chr1  | 11293554 | 11293593 | MTOR_227 | + | AAGTTATGAGAAAATGAATGCAGATTAGACTCTACTAGAAAAGATCGGAAGAGCGGTTACAGCAGGAATGCCGAGACCGATCTCGTATGCCGCTTCTGCTTG  |
| chr1  | 11294332 | 11294371 | MTOR_228 | + | GAAAGGCTCATATGTTCTCTATGGCAGAAGACATCTAGAAGATCGGAAGAGCGGTTACAGCAGGAATGCCGAGACCGATCTCGTATGCCGCTTCTGCTTG    |
| chr1  | 11298115 | 11298154 | MTOR_229 | + | AATGGAGCCTTTGAACATTTCTCATGATCCCATCACTCCAGATCGGAAGAGCGGTTACAGCAGGAATGCCGAGACCGATCTCGTATGCCGCTTCTGCTTG    |
| chr1  | 11298684 | 11298723 | MTOR_230 | + | AGGCAGAGAGAAAACAAGAATAAACACTGCTGTAGACAAGATCGGAAGAGCGGTTACAGCAGGAATGCCGAGACCGATCTCGTATGCCGCTTCTGCTTG     |
| chr1  | 11300614 | 11300653 | MTOR_231 | + | GGAAAACAGTCAACATAAGGGCTGGGCACATGACACTCAGTAGATCGGAAGAGCGGTTACAGCAGGAATGCCGAGACCGATCTCGTATGCCGCTTCTGCTTG  |
| chr1  | 11301748 | 11301787 | MTOR_232 | + | ATGGAGAGTGGCTAGTTGAGACATAATGACATTTCTTAATAGATCGGAAGAGCGGTTACAGCAGGAATGCCGAGACCGATCTCGTATGCCGCTTCTGCTTG   |

|      |           |           |            |   |                                                                                                          |
|------|-----------|-----------|------------|---|----------------------------------------------------------------------------------------------------------|
| chr1 | 11303367  | 11303406  | MTOR_233   | + | AAAAGACAAAGTAGATAGCTCCAGGTACGGGTTAGGGTCTAGATCGGAAGAGCGGTTACAGCAGGAATGCCGAGACCGATCTCGTATGCCGTCTTCTGCTTG   |
| chr1 | 11307800  | 11307839  | MTOR_234   | + | AAGGATAAAGGGTTGGCAGGGGAAAAGTGAGTGTGGAGCAGATCGGAAGAGCGGTTACAGCAGGAATGCCGAGACCGATCTCGTATGCCGTCTTCTGCTTG    |
| chr1 | 11308161  | 11308200  | MTOR_235   | + | GAGGAGGAAAAAATCATCTTTACTTATGACTGGCATTCAAGATCGGAAGAGCGGTTACAGCAGGAATGCCGAGACCGATCTCGTATGCCGTCTTCTGCTTG    |
| chr1 | 11314040  | 11314079  | MTOR_236   | + | AGACAGGGTGCCTTCATTAGAGACAGAGTACAAACCCAGAAGATCGGAAGAGCGGTTACAGCAGGAATGCCGAGACCGATCTCGTATGCCGTCTTCTGCTTG   |
| chr1 | 11316259  | 11316298  | MTOR_237   | + | AAGCAAACCGAGAACTCTCATTGTACCAGATTTTTGTTCAGATCGGAAGAGCGGTTACAGCAGGAATGCCGAGACCGATCTCGTATGCCGTCTTCTGCTTG    |
| chr1 | 11317232  | 11317271  | MTOR_238   | + | GAGGAAGGCAAAAGGTGATGAGGGCGTATGCTGCCAGAGATCGGAAGAGCGGTTACAGCAGGAATGCCGAGACCGATCTCGTATGCCGTCTTCTGCTTG      |
| chr1 | 11318660  | 11318699  | MTOR_239   | + | AGATATACTCAGAACAAATTTCTAATAATCTCTAACTGTGAGATCGGAAGAGCGGTTACAGCAGGAATGCCGAGACCGATCTCGTATGCCGTCTTCTGCTTG   |
| chr1 | 11319476  | 11319515  | MTOR_240   | + | GGTCTTTTAGAGAGAAGTTCCCTTTAATATTCTGGATAAGAGATCGGAAGAGCGGTTACAGCAGGAATGCCGAGACCGATCTCGTATGCCGTCTTCTGCTTG   |
| chr3 | 30648479  | 30648518  | TGFBR2_241 | + | CCCAGCCCGGGCTCGGCGGGGCGCCGGGGTCTTCTGGGAGATCGGAAGAGCGGTTACAGCAGGAATGCCGAGACCGATCTCGTATGCCGTCTTCTGCTTG     |
| chr3 | 30664775  | 30664814  | TGFBR2_242 | + | ATTAATTAATCTTTTTCATCTTTTCTAATTTTAGTCATGAGATCGGAAGAGCGGTTACAGCAGGAATGCCGAGACCGATCTCGTATGCCGTCTTCTGCTTG    |
| chr3 | 30686417  | 30686456  | TGFBR2_243 | + | CTTTAAGAAGTTATCTTTTCCCTTTTATCAAAAGATCGGAAGAGCGGTTACAGCAGGAATGCCGAGACCGATCTCGTATGCCGTCTTCTGCTTG           |
| chr3 | 30691962  | 30692001  | TGFBR2_244 | + | TTCTCTTAAGGGTGGGACCTGAGATGTGCCAATTTAGATCGGAAGAGCGGTTACAGCAGGAATGCCGAGACCGATCTCGTATGCCGTCTTCTGCTTG        |
| chr3 | 30713939  | 30713978  | TGFBR2_245 | + | GCTAGTCTAGATCCCTTTACCTTGGCCTGCCCTACCAGATCGGAAGAGCGGTTACAGCAGGAATGCCGAGACCGATCTCGTATGCCGTCTTCTGCTTG       |
| chr3 | 30715748  | 30715787  | TGFBR2_246 | + | ACCAGCATCATTGTGTAGTGGTAAACTTGTCTTCAAATAAGATCGGAAGAGCGGTTACAGCAGGAATGCCGAGACCGATCTCGTATGCCGTCTTCTGCTTG    |
| chr3 | 30730013  | 30730052  | TGFBR2_247 | + | AGTGTTCACAAAGGTCAGTAAGATCAACCAAGTTGCCCTCAGATCGGAAGAGCGGTTACAGCAGGAATGCCGAGACCGATCTCGTATGCCGTCTTCTGCTTG   |
| chr3 | 30733101  | 30733140  | TGFBR2_248 | + | GCAGGCTGGGCCATGTCCAAAGAGGCTGCCCTCTCACCAGATCGGAAGAGCGGTTACAGCAGGAATGCCGAGACCGATCTCGTATGCCGTCTTCTGCTTG     |
| chr5 | 112090732 | 112090771 | APC_249    | + | TGTGACTTTAATGTAGTTTATCCATTTTATTTCAGTATAGATCGGAAGAGCGGTTACAGCAGGAATGCCGAGACCGATCTCGTATGCCGTCTTCTGCTTG     |
| chr5 | 112102117 | 112102156 | APC_250    | + | AAAAGGTGTTTTAAATAAATTTTTAAGCTCAAATTTCAAGATCGGAAGAGCGGTTACAGCAGGAATGCCGAGACCGATCTCGTATGCCGTCTTCTGCTTG     |
| chr5 | 112103097 | 112103136 | APC_251    | + | TTCATATAGTAAACATTGCCTTGTACTCCAGTTTATTGAGATCGGAAGAGCGGTTACAGCAGGAATGCCGAGACCGATCTCGTATGCCGTCTTCTGCTTG     |
| chr5 | 112111444 | 112111483 | APC_252    | + | TGGCAGTACAACCTATTTGAACTTTAATAACTTGATATTAGATCGGAAGAGCGGTTACAGCAGGAATGCCGAGACCGATCTCGTATGCCGTCTTCTGCTTG    |
| chr5 | 112116610 | 112116649 | APC_253    | + | TGTTTTCAAGTGATAAAACAGCGAAGAGCTATTAGGAATAAGATCGGAAGAGCGGTTACAGCAGGAATGCCGAGACCGATCTCGTATGCCGTCTTCTGCTTG   |
| chr5 | 112128236 | 112128275 | APC_254    | + | TGCCCTTCTTGTGGTATAAAAATAGGTAGTTATTCAGATCGGAAGAGCGGTTACAGCAGGAATGCCGAGACCGATCTCGTATGCCGTCTTCTGCTTG        |
| chr5 | 112137090 | 112137129 | APC_255    | + | TATTTATCATATTTTTAAATATTTAATATCAGAAAAGATCGGAAGAGCGGTTACAGCAGGAATGCCGAGACCGATCTCGTATGCCGTCTTCTGCTTG        |
| chr5 | 112151300 | 112151339 | APC_256    | + | ATTACAAACCCTGGTCACTAATGCCATGACTACTTGAAGTTCAGATCGGAAGAGCGGTTACAGCAGGAATGCCGAGACCGATCTCGTATGCCGTCTTCTGCTTG |
| chr5 | 112155051 | 112155090 | APC_257    | + | TATAGTGACATCGTAGTGCATGTTCAAAGCAAATGTGAAGATCGGAAGAGCGGTTACAGCAGGAATGCCGAGACCGATCTCGTATGCCGTCTTCTGCTTG     |
| chr5 | 112157698 | 112157737 | APC_258    | + | AATGTTTTAATGACATAGACAATACTGGTGGATTTTAGATCGGAAGAGCGGTTACAGCAGGAATGCCGAGACCGATCTCGTATGCCGTCTTCTGCTTG       |
| chr5 | 112162954 | 112162993 | APC_259    | + | ATAACATGATTTCTAAGATAGCTCAGGTATGAGTTAATAGATCGGAAGAGCGGTTACAGCAGGAATGCCGAGACCGATCTCGTATGCCGTCTTCTGCTTG     |
| chr5 | 112163713 | 112163752 | APC_260    | + | GAATTTACCTGTTTTCTTTTTCTTTTTCTTTGAGGAGATCGGAAGAGCGGTTACAGCAGGAATGCCGAGACCGATCTCGTATGCCGTCTTCTGCTTG        |
| chr5 | 112164679 | 112164718 | APC_261    | + | AAACATTTAGTACTATAATGAATTTTCATGTTGGCTTTAGATCGGAAGAGCGGTTACAGCAGGAATGCCGAGACCGATCTCGTATGCCGTCTTCTGCTTG     |
| chr5 | 112170872 | 112170911 | APC_262    | + | AGTTTTATATTACTTTTTAAAGTACAGAATTTACTACTCTCAAGATCGGAAGAGCGGTTACAGCAGGAATGCCGAGACCGATCTCGTATGCCGTCTTCTGCTTG |
| chr5 | 112179833 | 112179872 | APC_263    | + | GAATGAACTAAGAAAATTCATGTTAATTACAACGTCTAAGATCGGAAGAGCGGTTACAGCAGGAATGCCGAGACCGATCTCGTATGCCGTCTTCTGCTTG     |
| chr7 | 55087068  | 55087107  | EGFR_264   | + | GTCTCGCCGGCTCCCGCGCCGCCCGGATCGCGCCCGGATCGGAAGAGCGGTTACAGCAGGAATGCCGAGACCGATCTCGTATGCCGTCTTCTGCTTG        |
| chr7 | 55210140  | 55210179  | EGFR_265   | + | TTGATTTTCTACACAAAATAAATGGAGAAAATCTAAGTAGATCGGAAGAGCGGTTACAGCAGGAATGCCGAGACCGATCTCGTATGCCGTCTTCTGCTTG     |
| chr7 | 55211191  | 55211230  | EGFR_266   | + | GGGATGCCAAGGCTGGGGTTCATAAATGCAGACAGCAGATCGGAAGAGCGGTTACAGCAGGAATGCCGAGACCGATCTCGTATGCCGTCTTCTGCTTG       |
| chr7 | 55214443  | 55214482  | EGFR_267   | + | CATACACACTCTCTGCCCTCAGCTCCTATGGGGGACAGATCGGAAGAGCGGTTACAGCAGGAATGCCGAGACCGATCTCGTATGCCGTCTTCTGCTTG       |
| chr7 | 55219065  | 55219104  | EGFR_268   | + | GAACAGCCTCAGACCCATGTGTGACCGCCCTCTCTTCTAGATCGGAAGAGCGGTTACAGCAGGAATGCCGAGACCGATCTCGTATGCCGTCTTCTGCTTG     |
| chr7 | 55220367  | 55220406  | EGFR_269   | + | CCTCCAGCAGCTCCCTGGAGCAGGCTGGGGCTGCACCCGAGATCGGAAGAGCGGTTACAGCAGGAATGCCGAGACCGATCTCGTATGCCGTCTTCTGCTTG    |
| chr7 | 55221855  | 55221894  | EGFR_270   | + | CTCTGTGGGCCCTCTAAGTGTGTCAGGCATCCTTGTCCCGCAGATCGGAAGAGCGGTTACAGCAGGAATGCCGAGACCGATCTCGTATGCCGTCTTCTGCTTG  |
| chr7 | 55223649  | 55223688  | EGFR_271   | + | CGCCGGTGTGCGGACGAGGCTTGTCTCGGCTGCTGAGGCAGATCGGAAGAGCGGTTACAGCAGGAATGCCGAGACCGATCTCGTATGCCGTCTTCTGCTTG    |
| chr7 | 55224362  | 55224401  | EGFR_272   | + | GGTTCAGTTGCTGTATAAAGAAAAAATAAGTCTGCCCTTTAGATCGGAAGAGCGGTTACAGCAGGAATGCCGAGACCGATCTCGTATGCCGTCTTCTGCTTG   |
| chr7 | 55224535  | 55224574  | EGFR_273   | + | AATTACACTGAATATAAATGGGAAATCAGTGTTTTAGAAGATCGGAAGAGCGGTTACAGCAGGAATGCCGAGACCGATCTCGTATGCCGTCTTCTGCTTG     |
| chr7 | 55224546  | 55224585  | EGFR_274   | + | GAATATAAATGGGAAATCAGTGTTTAGAGAGAGAATTTAGATCGGAAGAGCGGTTACAGCAGGAATGCCGAGACCGATCTCGTATGCCGTCTTCTGCTTG     |
| chr7 | 55225456  | 55225495  | EGFR_275   | + | CACAGCCAAGCCTGGTAGATTACATTTGCCTTTTAGTTAGATCGGAAGAGCGGTTACAGCAGGAATGCCGAGACCGATCTCGTATGCCGTCTTCTGCTTG     |
| chr7 | 55228041  | 55228080  | EGFR_276   | + | GCTTTCTGTTTATGAGTTGGTCTAATGGGTCCTAGATCGGAAGAGCGGTTACAGCAGGAATGCCGAGACCGATCTCGTATGCCGTCTTCTGCTTG          |
| chr7 | 55229334  | 55229373  | EGFR_277   | + | ATTTCTTAAATCCCTTGCCTGATCAAAAATAAGGCTCCAGATCGGAAGAGCGGTTACAGCAGGAATGCCGAGACCGATCTCGTATGCCGTCTTCTGCTTG     |
| chr7 | 55231526  | 55231565  | EGFR_278   | + | CTTGCTGCTATCCACGCTCACTTTCATGGGAAGGGCCCTCAAGATCGGAAGAGCGGTTACAGCAGGAATGCCGAGACCGATCTCGTATGCCGTCTTCTGCTTG  |
| chr7 | 55233140  | 55233179  | EGFR_279   | + | AGTGAAGGAGAACAGAACATTTCTCTCTTGCAAATTCAGAGATCGGAAGAGCGGTTACAGCAGGAATGCCGAGACCGATCTCGTATGCCGTCTTCTGCTTG    |
| chr7 | 55236232  | 55236271  | EGFR_280   | + | CTGTCTGACTTTAGTCTCCACTAAAAGTGCATTTCTTTAGATCGGAAGAGCGGTTACAGCAGGAATGCCGAGACCGATCTCGTATGCCGTCTTCTGCTTG     |
| chr7 | 55238247  | 55238286  | EGFR_281   | + | TTACAGTGTCTGTTCCCGCCGCTTTTCTTTCTGCCACCCAGATCGGAAGAGCGGTTACAGCAGGAATGCCGAGACCGATCTCGTATGCCGTCTTCTGCTTG    |
| chr7 | 55238916  | 55238955  | EGFR_282   | + | ACAGCTGTGTGCACATGGACCTCGTCAAGAATGACCACAAGATCGGAAGAGCGGTTACAGCAGGAATGCCGAGACCGATCTCGTATGCCGTCTTCTGCTTG    |
| chr7 | 55240827  | 55240866  | EGFR_283   | + | GCTCTGGTGGCTCAGGACCCCTGCACCCCGACGAAAGATCGGAAGAGCGGTTACAGCAGGAATGCCGAGACCGATCTCGTATGCCGTCTTCTGCTTG        |
| chr7 | 55241746  | 55241785  | EGFR_284   | + | TGGCACAGGCTCTGGGCTGGCCCGCAGGCCCTCATGGAGATCGGAAGAGCGGTTACAGCAGGAATGCCGAGACCGATCTCGTATGCCGTCTTCTGCTTG      |
| chr7 | 55242523  | 55242562  | EGFR_285   | + | GCTTTGCTGTGTGGGGTCCATGGCTCTGAACCTCAGGCCAGATCGGAAGAGCGGTTACAGCAGGAATGCCGAGACCGATCTCGTATGCCGTCTTCTGCTTG    |
| chr7 | 55249181  | 55249220  | EGFR_286   | + | AAGGGAGATACGGGGAGGGGAGATAAGGAGCCAGGATCTAGATCGGAAGAGCGGTTACAGCAGGAATGCCGAGACCGATCTCGTATGCCGTCTTCTGCTTG    |
| chr7 | 55259577  | 55259616  | EGFR_287   | + | GGCTTTAGGTGAGCCAGCATTTTCTGACACCAAGGACCAAGATCGGAAGAGCGGTTACAGCAGGAATGCCGAGACCGATCTCGTATGCCGTCTTCTGCTTG    |
| chr7 | 55260544  | 55260583  | EGFR_288   | + | ATCCTGATGCTAATGAGTTTGTACTGAGGCCAAGCTGGCTAGATCGGAAGAGCGGTTACAGCAGGAATGCCGAGACCGATCTCGTATGCCGTCTTCTGCTTG   |
| chr7 | 55266566  | 55266605  | EGFR_289   | + | GGTGGTCTGTCCACTGCTAGCTGAGCCTTGGTGGTGCATCGGAAGAGCGGTTACAGCAGGAATGCCGAGACCGATCTCGTATGCCGTCTTCTGCTTG        |
| chr7 | 55268116  | 55268155  | EGFR_290   | + | CAGTCTGTCTTCCACTGGGAAGAGTCCCTCTAATGAGCAAGATCGGAAGAGCGGTTACAGCAGGAATGCCGAGACCGATCTCGTATGCCGTCTTCTGCTTG    |

|       |           |           |           |   |                                                                                                          |
|-------|-----------|-----------|-----------|---|----------------------------------------------------------------------------------------------------------|
| chr7  | 55269058  | 55269097  | EGFR_291  | + | TCTGTCTCTCTCTCTCTCAAGCTGTGCTACTCATTTGAGATCGGAAGAGCGGTTACAGCAGGAATGCCGAGACCGATCTCGTATGCCGTCTTCTGCTTG      |
| chr7  | 55269485  | 55269524  | EGFR_292  | + | ACACCTTATAAGCCAGAAATTTACAGCTCTCCACTATGGCTAGATCGGAAGAGCGGTTACAGCAGGAATGCCGAGACCGATCTCGTATGCCGTCTTCTGCTTG  |
| chr7  | 55270328  | 55270367  | EGFR_293  | + | TGTCTGGAAACAGTCTCTGCTCCTCAACCTCCTCGACCCACAGATCGGAAGAGCGGTTACAGCAGGAATGCCGAGACCGATCTCGTATGCCGTCTTCTGCTTG  |
| chr7  | 55273320  | 55273359  | EGFR_294  | + | TAGTATGAGCCCTAAAAATCCAGACTCTTTGATACCCAGAGATCGGAAGAGCGGTTACAGCAGGAATGCCGAGACCGATCTCGTATGCCGTCTTCTGCTTG    |
| chr12 | 25362855  | 25362894  | KRAS_295  | + | TAAAAAGTATTAATAATGTAATATACGATGGCTTCATGAGATCGGAAGAGCGGTTACAGCAGGAATGCCGAGACCGATCTCGTATGCCGTCTTCTGCTTG     |
| chr12 | 25368504  | 25368543  | KRAS_296  | + | AAACACAACCTCTTAAAGTCTGTGTCATTGGTAAGAGTAGATCGGAAGAGCGGTTACAGCAGGAATGCCGAGACCGATCTCGTATGCCGTCTTCTGCTTG     |
| chr12 | 25378717  | 25378756  | KRAS_297  | + | AAAAAAGTTATAGCACAGTCACTAGTAACACAATAATAGTAGATCGGAAGAGCGGTTACAGCAGGAATGCCGAGACCGATCTCGTATGCCGTCTTCTGCTTG   |
| chr12 | 25380356  | 25380395  | KRAS_298  | + | AGAAACACAGTCTGGATTATTAAGTGCACCTTTTACTTCAGATCGGAAGAGCGGTTACAGCAGGAATGCCGAGACCGATCTCGTATGCCGTCTTCTGCTTG    |
| chr12 | 25398328  | 25398367  | KRAS_299  | + | CCTTATAATAAAAAATAATGAAATGTGACTATATTAGAACAGATCGGAAGAGCGGTTACAGCAGGAATGCCGAGACCGATCTCGTATGCCGTCTTCTGCTTG   |
| chr14 | 103852427 | 103852466 | MARK3_300 | + | TGGGCGTGTAGTTGGCGGACCTTCGGGGTGGCATTCTGTAGATCGGAAGAGCGGTTACAGCAGGAATGCCGAGACCGATCTCGTATGCCGTCTTCTGCTTG    |
| chr14 | 103871614 | 103871653 | MARK3_301 | + | GTTATGCTTATTTCTGTTATGACAGTTGCTCTGTTTATTAGATCGGAAGAGCGGTTACAGCAGGAATGCCGAGACCGATCTCGTATGCCGTCTTCTGCTTG    |
| chr14 | 103894787 | 103894826 | MARK3_302 | + | TTCAATGCTAGTACTTTTTAAAAAATTATCGGTGCTAATAGATCGGAAGAGCGGTTACAGCAGGAATGCCGAGACCGATCTCGTATGCCGTCTTCTGCTTG    |
| chr14 | 103915314 | 103915353 | MARK3_303 | + | CTTTTTAAATATTTTTGGGTCTAAATACGTAAGTACTGTAATAGATCGGAAGAGCGGTTACAGCAGGAATGCCGAGACCGATCTCGTATGCCGTCTTCTGCTTG |
| chr14 | 103918330 | 103918369 | MARK3_304 | + | TTTTATATATATGGGTTTTTTTTCTTCTCCCTTTTAAAGATCGGAAGAGCGGTTACAGCAGGAATGCCGAGACCGATCTCGTATGCCGTCTTCTGCTTG      |
| chr14 | 103923559 | 103923598 | MARK3_305 | + | ATGTGCTTTACTATGTCAATTTGATAATTTATCTCACTTAGATCGGAAGAGCGGTTACAGCAGGAATGCCGAGACCGATCTCGTATGCCGTCTTCTGCTTG    |
| chr14 | 103928808 | 103928847 | MARK3_306 | + | GTGCCCTACTCAGTGTATGCTCTGTCTGTTTGTGTGAGTAGATCGGAAGAGCGGTTACAGCAGGAATGCCGAGACCGATCTCGTATGCCGTCTTCTGCTTG    |
| chr14 | 103932140 | 103932179 | MARK3_307 | + | CTGCACCCATGTACTTCACTAACTAAAAGAAAGTTTCTAAGATCGGAAGAGCGGTTACAGCAGGAATGCCGAGACCGATCTCGTATGCCGTCTTCTGCTTG    |
| chr14 | 103932438 | 103932477 | MARK3_308 | + | AGGTGGAAACAGGCACTAAGTCTGGAGAGTCTTTAGAGTGTAGATCGGAAGAGCGGTTACAGCAGGAATGCCGAGACCGATCTCGTATGCCGTCTTCTGCTTG  |
| chr14 | 103932789 | 103932828 | MARK3_309 | + | CATGCCTGCATGTTTCATGTGTTTTGTCTAAGTAACATATAGATCGGAAGAGCGGTTACAGCAGGAATGCCGAGACCGATCTCGTATGCCGTCTTCTGCTTG   |
| chr14 | 103933538 | 103933577 | MARK3_310 | + | TCAGAAAGAGCTGAAATACCCTGTATGTAATTATTAGTTTAGATCGGAAGAGCGGTTACAGCAGGAATGCCGAGACCGATCTCGTATGCCGTCTTCTGCTTG   |
| chr14 | 103934533 | 103934572 | MARK3_311 | + | GAGTATCCAGTGCCCTTCTTAGAGTCCAGGCAGAGGTAGATCGGAAGAGCGGTTACAGCAGGAATGCCGAGACCGATCTCGTATGCCGTCTTCTGCTTG      |
| chr14 | 103941557 | 103941596 | MARK3_312 | + | TTGAACATAGAGTGGTCTTAGGGTGGTAGGGTTGGAACCAGATCGGAAGAGCGGTTACAGCAGGAATGCCGAGACCGATCTCGTATGCCGTCTTCTGCTTG    |
| chr14 | 103946837 | 103946876 | MARK3_313 | + | CTACCTGTGGTAAGAAAGTTGTTTTTCCCAAGAGAAATAGATCGGAAGAGCGGTTACAGCAGGAATGCCGAGACCGATCTCGTATGCCGTCTTCTGCTTG     |
| chr14 | 103958381 | 103958420 | MARK3_314 | + | GGTGTGTTGTTTTGAAAGTGAACACATAGAGCAAAGAGATCGGAAGAGCGGTTACAGCAGGAATGCCGAGACCGATCTCGTATGCCGTCTTCTGCTTG       |
| chr14 | 103964875 | 103964914 | MARK3_315 | + | TATATACACATTTATTTTCACTCCTCACTCCCAAATGGCAGATCGGAAGAGCGGTTACAGCAGGAATGCCGAGACCGATCTCGTATGCCGTCTTCTGCTTG    |
| chr14 | 103966547 | 103966586 | MARK3_316 | + | TGATTTTTACTTAAAAATTTTTTCCAGTGTACTTTCATTAGATCGGAAGAGCGGTTACAGCAGGAATGCCGAGACCGATCTCGTATGCCGTCTTCTGCTTG    |
| chr14 | 103969574 | 103969613 | MARK3_317 | + | ATGATGTAATAAGTAGCAATAAAGTGTTCCTGAACAGATCGGAAGAGCGGTTACAGCAGGAATGCCGAGACCGATCTCGTATGCCGTCTTCTGCTTG        |
| chr14 | 105236767 | 105236806 | AKT1_318  | + | AGACAGCTCAGACCCCGGTGCCCCACCTCCCTGCCACCTCAGATCGGAAGAGCGGTTACAGCAGGAATGCCGAGACCGATCTCGTATGCCGTCTTCTGCTTG   |
| chr14 | 105237194 | 105237233 | AKT1_319  | + | GGGCAGACGGGACAGTACGCTTCCCTCCCTCCCAAGATCGGAAGAGCGGTTACAGCAGGAATGCCGAGACCGATCTCGTATGCCGTCTTCTGCTTG         |
| chr14 | 105238799 | 105238838 | AKT1_320  | + | GAAACAAGGCCACAGTGTGCGTACCGCCACCTGCCAGGCAGATCGGAAGAGCGGTTACAGCAGGAATGCCGAGACCGATCTCGTATGCCGTCTTCTGCTTG    |
| chr14 | 105239439 | 105239478 | AKT1_321  | + | GGCAGATGGGACAGGACTCGGCATCAAGGGGTGTCGGGACAGATCGGAAGAGCGGTTACAGCAGGAATGCCGAGACCGATCTCGTATGCCGTCTTCTGCTTG   |
| chr14 | 105239726 | 105239765 | AKT1_322  | + | GGTGGCTCAGGTCAAGTCCCGCCAGGCCCCAGGGCCCTGAGATCGGAAGAGCGGTTACAGCAGGAATGCCGAGACCGATCTCGTATGCCGTCTTCTGCTTG    |
| chr14 | 105239927 | 105239966 | AKT1_323  | + | CGCAACCTGAGGCACAGCCGTGGCTCGGGCCTCTGCCCCAGATCGGAAGAGCGGTTACAGCAGGAATGCCGAGACCGATCTCGTATGCCGTCTTCTGCTTG    |
| chr14 | 105240327 | 105240366 | AKT1_324  | + | GGGGAGCTGGAATCGCGCCCAAGCCAGCAGCAGCAGATCGGAAGAGCGGTTACAGCAGGAATGCCGAGACCGATCTCGTATGCCGTCTTCTGCTTG         |
| chr14 | 105241350 | 105241389 | AKT1_325  | + | GGGCTGGGTGAGCTGCCACCCCGCACCCTCCTCCACCAGATCGGAAGAGCGGTTACAGCAGGAATGCCGAGACCGATCTCGTATGCCGTCTTCTGCTTG      |
| chr14 | 105241554 | 105241593 | AKT1_326  | + | GCACCAGGGTCAGCAAGCGGCGCTGCCAACAGTCCACAGCAGATCGGAAGAGCGGTTACAGCAGGAATGCCGAGACCGATCTCGTATGCCGTCTTCTGCTTG   |
| chr14 | 105242146 | 105242185 | AKT1_327  | + | TCAGGTGAGGCTGCAGGCCTGTACCAGATCAGGAGCTCCAAGATCGGAAGAGCGGTTACAGCAGGAATGCCGAGACCGATCTCGTATGCCGTCTTCTGCTTG   |
| chr14 | 105243117 | 105243156 | AKT1_328  | + | GCAGAGCCTCTGCTGCGTGCATCCCCCTGCCCTCCAGAGATCGGAAGAGCGGTTACAGCAGGAATGCCGAGACCGATCTCGTATGCCGTCTTCTGCTTG      |
| chr14 | 105246563 | 105246602 | AKT1_329  | + | GCGGGTGGTGAGAGCCACGCACACTTACCCGTGAGCCAGATCGGAAGAGCGGTTACAGCAGGAATGCCGAGACCGATCTCGTATGCCGTCTTCTGCTTG      |
| chr14 | 105258990 | 105259029 | AKT1_330  | + | GCTCCCGCAGCCTCAGCGCTCCTCTCAGCTGGCGTCAGATCGGAAGAGCGGTTACAGCAGGAATGCCGAGACCGATCTCGTATGCCGTCTTCTGCTTG       |
| chr17 | 7573018   | 7573057   | TP53_331  | + | CAGAAGCAGGGAGGAGATGACATCACATGAGTAGAGGATCGGAAGAGCGGTTACAGCAGGAATGCCGAGACCGATCTCGTATGCCGTCTTCTGCTTG        |
| chr17 | 7574043   | 7574082   | TP53_332  | + | AGAGGAGGGGGAGAAGTAAATATACACAGTACCTGAGTAGATCGGAAGAGCGGTTACAGCAGGAATGCCGAGACCGATCTCGTATGCCGTCTTCTGCTTG     |
| chr17 | 7576594   | 7576633   | TP53_333  | + | CAAAGTCATAGAACCATTTTCATGCTCTCTTTAAACAATTTAGATCGGAAGAGCGGTTACAGCAGGAATGCCGAGACCGATCTCGTATGCCGTCTTCTGCTTG  |
| chr17 | 7576667   | 7576706   | TP53_334  | + | TATATTATGGTATAAGTTGGTGTCTGAAGTTAGTTAGTGTAGATCGGAAGAGCGGTTACAGCAGGAATGCCGAGACCGATCTCGTATGCCGTCTTCTGCTTG   |
| chr17 | 7576936   | 7576975   | TP53_335  | + | GGCAAGGAAAGGTGATAAAGTGAATCTGAGGCATACTGAGATCGGAAGAGCGGTTACAGCAGGAATGCCGAGACCGATCTCGTATGCCGTCTTCTGCTTG     |
| chr17 | 7577165   | 7577204   | TP53_336  | + | TAGGAAAAGAGGCAAGGAGGCAAGTAAAGAAATCAGTCCAGATCGGAAGAGCGGTTACAGCAGGAATGCCGAGACCGATCTCGTATGCCGTCTTCTGCTTG    |
| chr17 | 7577618   | 7577657   | TP53_337  | + | ACACAGGCCCAAGATGAGGCCAGTGCCTTGGGGAGACCAGATCGGAAGAGCGGTTACAGCAGGAATGCCGAGACCGATCTCGTATGCCGTCTTCTGCTTG     |
| chr17 | 7578299   | 7578338   | TP53_338  | + | TCAGTGAGGAATCAGAGGCCTGGGGACCTGGGCAACCAGAGATCGGAAGAGCGGTTACAGCAGGAATGCCGAGACCGATCTCGTATGCCGTCTTCTGCTTG    |
| chr17 | 7578564   | 7578603   | TP53_339  | + | AGGAAGGAGACAGAGTTGAAAGTCAGGGCACAAAGTGAACAAGATCGGAAGAGCGGTTACAGCAGGAATGCCGAGACCGATCTCGTATGCCGTCTTCTGCTTG  |
| chr17 | 7579600   | 7579639   | TP53_340  | + | GTGAAAAGAGCAGTCAGAGGCCAGGTCCTCAGCCCCCAAGATCGGAAGAGCGGTTACAGCAGGAATGCCGAGACCGATCTCGTATGCCGTCTTCTGCTTG     |
| chr17 | 7579731   | 7579770   | TP53_341  | + | AGAGCAGAAATCAGTCCCATGGAATTTTCCTCCCAAGATCGGAAGAGCGGTTACAGCAGGAATGCCGAGACCGATCTCGTATGCCGTCTTCTGCTTG        |
| chr17 | 7579922   | 7579961   | TP53_342  | + | CGGAAGCAGTCTGGCTGCTGCAAGAGGAAAAGTGGGGATCGGAAGAGCGGTTACAGCAGGAATGCCGAGACCGATCTCGTATGCCGTCTTCTGCTTG        |
| chr18 | 48573675  | 48573714  | SMAD4_343 | + | TAAGAGTTTTCTATACCTCTATGGTGGCAGATTTAAAAAGATCGGAAGAGCGGTTACAGCAGGAATGCCGAGACCGATCTCGTATGCCGTCTTCTGCTTG     |
| chr18 | 48575240  | 48575279  | SMAD4_344 | + | TTTGCTTTCATCTAAGAAACATAAAGGGAAAAGGATCTCAGATCGGAAGAGCGGTTACAGCAGGAATGCCGAGACCGATCTCGTATGCCGTCTTCTGCTTG    |
| chr18 | 48575704  | 48575743  | SMAD4_345 | + | TGTTTCTACTACTTTCTCTTTGTTTTGTCCTATCCTCTCAGATCGGAAGAGCGGTTACAGCAGGAATGCCGAGACCGATCTCGTATGCCGTCTTCTGCTTG    |
| chr18 | 48581373  | 48581412  | SMAD4_346 | + | GAATCAGATGTAGTCAGCAAGTTGAGTTTTTCTAATCATTAGATCGGAAGAGCGGTTACAGCAGGAATGCCGAGACCGATCTCGTATGCCGTCTTCTGCTTG   |
| chr18 | 48584624  | 48584663  | SMAD4_347 | + | ACTTTAAAAAATCTTTAAATAGTTGAGAAAAAAGTAGGCAGATCGGAAGAGCGGTTACAGCAGGAATGCCGAGACCGATCTCGTATGCCGTCTTCTGCTTG    |
| chr18 | 48584836  | 48584875  | SMAD4_348 | + | GTTTTTGTGAAGGGCTATTTTTTTTTTTTTTTTTTTTGGTAGAGATCGGAAGAGCGGTTACAGCAGGAATGCCGAGACCGATCTCGTATGCCGTCTTCTGCTTG |

|       |          |          |           |   |                                                                                                          |
|-------|----------|----------|-----------|---|----------------------------------------------------------------------------------------------------------|
| chr18 | 48586296 | 48586335 | SMAD4_349 | + | TTCAAATGATTTCTGTATTTAGATTGATTTAGTGGTGAGATCGGAAGAGCGGTTCAGCAGGAATGCCGAGACCGATCTCGTATGCCGTCTTCTGCTTG       |
| chr18 | 48591986 | 48592025 | SMAD4_350 | + | TATAGTCAGATAGTTACTTTAAAAAATTGAGCATAGTACAAGATCGGAAGAGCGGTTCAGCAGGAATGCCGAGACCGATCTCGTATGCCGTCTTCTGCTTG    |
| chr18 | 48593567 | 48593606 | SMAD4_351 | + | ATTTTATTTGAATATTTTAGACTTAAAGCTCTATTTGTTGAGATCGGAAGAGCGGTTCAGCAGGAATGCCGAGACCGATCTCGTATGCCGTCTTCTGCTTG    |
| chr18 | 48603156 | 48603195 | SMAD4_352 | + | TTTTTATTCTTTTTAAAGGTATAATAGTTGATATTTTAAAGATCGGAAGAGCGGTTTACAGCAGGAATGCCGAGACCGATCTCGTATGCCGTCTTCTGCTTG   |
| chr18 | 48604847 | 48604886 | SMAD4_353 | + | CGTTGGGGCCCTTAACCTTATCAGGATGGTGGACTACAAAAGATCGGAAGAGCGGTTTACAGCAGGAATGCCGAGACCGATCTCGTATGCCGTCTTCTGCTTG  |
| chr19 | 40739868 | 40739907 | AKT2_354  | + | CAGAGGTGGATGGGGAGGACCAGTCAGGAGAGGGCCTGGGAGATCGGAAGAGCGGTTTACAGCAGGAATGCCGAGACCGATCTCGTATGCCGTCTTCTGCTTG  |
| chr19 | 40741064 | 40741103 | AKT2_355  | + | GAGGAGCTCAGGCTCAGGGACCCCTGAGGCCAGGAGGCCTCAGATCGGAAGAGCGGTTTACAGCAGGAATGCCGAGACCGATCTCGTATGCCGTCTTCTGCTTG |
| chr19 | 40741267 | 40741306 | AKT2_356  | + | ACGGCCGTCAGCACCTGCCTCCCGGAGCAGCTGGGTTCCGAGATCGGAAGAGCGGTTTACAGCAGGAATGCCGAGACCGATCTCGTATGCCGTCTTCTGCTTG  |
| chr19 | 40742021 | 40742060 | AKT2_357  | + | AGGAGAAATGAGGGCTGGGCCCTGGCCCTGAGGCTGGCAAGATCGGAAGAGCGGTTTACAGCAGGAATGCCGAGACCGATCTCGTATGCCGTCTTCTGCTTG   |
| chr19 | 40742302 | 40742341 | AKT2_358  | + | AGTCAACGGATCTCAGGTGCATGCTCCCAAGGCTTCTCTGCAGATCGGAAGAGCGGTTTACAGCAGGAATGCCGAGACCGATCTCGTATGCCGTCTTCTGCTTG |
| chr19 | 40744008 | 40744047 | AKT2_359  | + | AAGGGTGGGGAGAGGAGGTCAGGCCCCAGCCCACCACAGATCGGAAGAGCGGTTTACAGCAGGAATGCCGAGACCGATCTCGTATGCCGTCTTCTGCTTG     |
| chr19 | 40744890 | 40744929 | AKT2_360  | + | AAGGCAGCAGGGTGGGAGGTGGGAGGGAGGAGGGCTCTGCAGATCGGAAGAGCGGTTTACAGCAGGAATGCCGAGACCGATCTCGTATGCCGTCTTCTGCTTG  |
| chr19 | 40746027 | 40746066 | AKT2_361  | + | ACTGCGGGTGAGGGCTGGTGGGCAACACCACACCTGCCAGATCGGAAGAGCGGTTTACAGCAGGAATGCCGAGACCGATCTCGTATGCCGTCTTCTGCTTG    |
| chr19 | 40747986 | 40748025 | AKT2_362  | + | CAGGGAGAGTGGGGCAGTCAGCGCCTGGCTCATGGCCGAGATCGGAAGAGCGGTTTACAGCAGGAATGCCGAGACCGATCTCGTATGCCGTCTTCTGCTTG    |
| chr19 | 40748604 | 40748643 | AKT2_363  | + | ACACACGTGAGTCCCAGCAGCCAGGAGTCCTGGCCCTCAGAGATCGGAAGAGCGGTTTACAGCAGGAATGCCGAGACCGATCTCGTATGCCGTCTTCTGCTTG  |
| chr19 | 40761186 | 40761225 | AKT2_364  | + | AGGGAACAGACAGCAGGGGGCTGAGGGGATAGCCCTGCTAAGATCGGAAGAGCGGTTTACAGCAGGAATGCCGAGACCGATCTCGTATGCCGTCTTCTGCTTG  |
| chr19 | 40762971 | 40763010 | AKT2_365  | + | GCAGGAAGGGAGGGAGAGAGGTTAGGACAAGGTTGAGTGAAGATCGGAAGAGCGGTTTACAGCAGGAATGCCGAGACCGATCTCGTATGCCGTCTTCTGCTTG  |
| chr19 | 40771184 | 40771223 | AKT2_366  | + | TGGTACGCTGTCACCTAGCTCGGGACAGCTCAGGGCAGCAAGATCGGAAGAGCGGTTTACAGCAGGAATGCCGAGACCGATCTCGTATGCCGTCTTCTGCTTG  |
