# Supplementary material
Source: PubMed Central journal article supplement (PMC4336783)
Supplement: NIHMS664701-supplement-Supp_Table_5.pdf [file NIHMS664701-supplement-Supp_Table_5.pdf]

|       |           |           |           |   |                                                                                           |
|-------|-----------|-----------|-----------|---|-------------------------------------------------------------------------------------------|
| chr9  | 21968178  | 21968217  | CDKN2A_1  | - | GTGACCTATGCACCAGACGTGAGGCTCTGAGAAACCTCGGGAAACTTAGATCATCAGTCAAGATCGGAAGAGCGGTTTCAG         |
| chr9  | 21970851  | 21970890  | CDKN2A_2  | - | GTGACCTATGCACCAGACGTGATCTGAGAAATTTGTACCCTGAGAGCTTCCAAAGCTCAAGATCGGAAGAGCGGTTTCAG          |
| chr9  | 21970952  | 21970991  | CDKN2A_3  | - | GTGACCTATGCACCAGACGTGCATCGCGATGTCGCACGGTACCTGCGCGCGGCTGCGGGGGAGATCGGAAGAGCGGTTTCAG        |
| chr9  | 21974426  | 21974465  | CDKN2A_4  | - | GTGACCTATGCACCAGACGTGCGTACAGATCTCTCGAATGCTGAGAAGATCTGAAGGGGGAGATCGGAAGAGCGGTTTCAG         |
| chr9  | 21974627  | 21974666  | CDKN2A_5  | - | GTGACCTATGCACCAGACGTGGTCTGCAGCGGGAGCAGGGGATGGCGGGCGACTCTGGAGAGATCGGAAGAGCGGTTTCAG         |
| chr9  | 21994088  | 21994127  | CDKN2A_6  | - | GTGACCTATGCACCAGACGTCCCTCGAAAAGTCCGGGGCGCATTCCGCACTTGTGTTTTGTTAGATCGGAAGAGCGGTTTCAG       |
| chr7  | 55086921  | 55086960  | EGFR_7    | - | GTGACCTATGCACCAGACGTGAAAGAGCTGCTCCGGCTCTCCCGATCAATACTGGACCGGATCGGAAGAGCGGTTTCAG           |
| chr7  | 55209929  | 55209968  | EGFR_8    | - | GTGACCTATGCACCAGACGTAAAGACAGATATCACATGAAATACTGAGAAATGCAGAAAAAAGATCGGAAGAGCGGTTTCAG        |
| chr7  | 55210948  | 55210987  | EGFR_9    | - | GTGACCTATGCACCAGACGTAAAAACATAAATGCGTGATTTCTCTTTTGAGGAAGTCAAGAAGATCGGAAGAGCGGTTTCAG        |
| chr7  | 55214249  | 55214288  | EGFR_10   | - | GTGACCTATGCACCAGACGTATGGAAGTGCAGGAGCAGTCTTTCCAGCTCCTTTAAATAGATCGGAAGAGCGGTTTCAG           |
| chr7  | 55218937  | 55218976  | EGFR_11   | - | GTGACCTATGCACCAGACGTAAAGTAATAGATGCATATCTCAGTGAATGATGAGAACTAGATCGGAAGAGCGGTTTCAG           |
| chr7  | 55220189  | 55220228  | EGFR_12   | - | GTGACCTATGCACCAGACGTGCAAAGGTTCCCTGTGAGCTGAAGAGTGAGGGTAGGATCAAGATCGGAAGAGCGGTTTCAG         |
| chr7  | 55221654  | 55221693  | EGFR_13   | - | GTGACCTATGCACCAGACGTGAGAGGACACCTGGCAAGTGAGGTAAAGTACACTACGCCAGATCGGAAGAGCGGTTTCAG          |
| chr7  | 55223473  | 55223512  | EGFR_14   | - | GTGACCTATGCACCAGACGTGAGCATGAAAGGAAGGTGATGACGGTGGCACCAGGTGCTCAGATCGGAAGAGCGGTTTCAG         |
| chr7  | 55224176  | 55224215  | EGFR_15   | - | GTGACCTATGCACCAGACGTAAAGAGAGACGTGATTCCGTTCCACATTTGTTGGATTAAGAAGATCGGAAGAGCGGTTTCAG        |
| chr7  | 55224402  | 55224441  | EGFR_16   | - | GTGACCTATGCACCAGACGTCAACAGGGTGATTATGATCACCATCTCTACCAGTTAAAGATCGGAAGAGCGGTTTCAG            |
| chr7  | 55225306  | 55225345  | EGFR_17   | - | GTGACCTATGCACCAGACGTGATGAAAGACTTCAGACACACCACGTTAGGAGTTTCTTTAGATCGGAAGAGCGGTTTCAG          |
| chr7  | 55227782  | 55227821  | EGFR_18   | - | GTGACCTATGCACCAGACGTGAGAAAGAAATCATGTGGTGAATAATAAAAAAATGAGATCGGAAGAGCGGTTTCAG              |
| chr7  | 55229142  | 55229181  | EGFR_19   | - | GTGACCTATGCACCAGACGTAGAGTGGGTACAGCAGTCAAGTACAGAGCAGGGACCCGAAGATCGGAAGAGCGGTTTCAG          |
| chr7  | 55231376  | 55231415  | EGFR_20   | - | GTGACCTATGCACCAGACGTGAAGAGGAAACCCGTCAGCCCACCCCTGAGACATTATGAGATCGGAAGAGCGGTTTCAG           |
| chr7  | 55232923  | 55232962  | EGFR_21   | - | GTGACCTATGCACCAGACGTGTTGAGAAAAATGTTTCATGCATGCTCTTTCTTTCTCTTAGATCGGAAGAGCGGTTTCAG          |
| chr7  | 55236166  | 55236205  | EGFR_22   | - | GTGACCTATGCACCAGACGTATAGAAAAGACATTAGAAAAATGACCATAACATTTTAAATAGATCGGAAGAGCGGTTTCAG         |
| chr7  | 55237950  | 55237989  | EGFR_23   | - | GTGACCTATGCACCAGACGTATGGACAAGTACATTTCAATATGTAGAGGCCCTGGGGAGCAGATCGGAAGAGCGGTTTCAG         |
| chr7  | 55238818  | 55238857  | EGFR_24   | - | GTGACCTATGCACCAGACGTGAAAGAAATATACATTTTCTCATTCTACTTCTTTGAGATCGGAAGAGCGGTTTCAG              |
| chr7  | 55240626  | 55240665  | EGFR_25   | - | GTGACCTATGCACCAGACGTGTTGAGGAACAAGGAAGGGTGAAGTTGCTGACAGATCCAAGATCGGAAGAGCGGTTTCAG          |
| chr7  | 55241564  | 55241603  | EGFR_26   | - | GTGACCTATGCACCAGACGTCAAGAACACAGAGACAAGGGTCACTCAGCCCTCACCATGAGATCGGAAGAGCGGTTTCAG          |
| chr7  | 55242365  | 55242404  | EGFR_27   | - | GTGACCTATGCACCAGACGTGAGAGAAGGAAGACGTTAACTGGCAATTGTGAGATGGTGCAGATCGGAAGAGCGGTTTCAG         |
| chr7  | 55248936  | 55248975  | EGFR_28   | - | GTGACCTATGCACCAGACGTGGAGAGGCCAGTCAAGTGGCTTCGCATGGTGGCCAGAAGAGATCGGAAGAGCGGTTTCAG          |
| chr7  | 55259362  | 55259401  | EGFR_29   | - | GTGACCTATGCACCAGACGTGAAGACCCTGCTGTGAGGGACAGATCATGGGAAGAAGAGATCGGAAGAGCGGTTTCAG            |
| chr7  | 55260409  | 55260448  | EGFR_30   | - | GTGACCTATGCACCAGACGTGAGAGATGAGGCAATGAGGCAACTATTAGTTTCCCTCTGAGATCGGAAGAGCGGTTTCAG          |
| chr7  | 55266360  | 55266399  | EGFR_31   | - | GTGACCTATGCACCAGACGTGAAGCAAGAAAAGAAGGCAGTGGGATCATGAATGAACAATAGATCGGAAGAGCGGTTTCAG         |
| chr7  | 55267959  | 55267998  | EGFR_32   | - | GTGACCTATGCACCAGACGTAAAGAAAAACAGTGCATTAAGAACAAGTGAAGAATGAGATCGGAAGAGCGGTTTCAG             |
| chr7  | 55268831  | 55268870  | EGFR_33   | - | GTGACCTATGCACCAGACGTGATTTTGAAGGCTATTAGAATGGCCCTGAGAGATGCTATTCAAGATCGGAAGAGCGGTTTCAG       |
| chr7  | 55269378  | 55269417  | EGFR_34   | - | GTGACCTATGCACCAGACGTAAAGAAAGTGGCCATGGAATGCTTTGACCATCTCAAGATCGGAAGAGCGGTTTCAG              |
| chr17 | 7572877   | 7572916   | TP53_35   | - | GTGACCTATGCACCAGACGTCTTCTGTTCCCTACTGACAGCCTCCCAACCCCATCTCCAGATCGGAAGAGCGGTTTCAG           |
| chr17 | 7573877   | 7573916   | TP53_36   | - | GTGACCTATGCACCAGACGTTCAGCCCTTCTGCCCCTACTCCCTGCCTTCTAGGTTAGATCGGAAGAGCGGTTTCAG             |
| chr17 | 7576803   | 7576842   | TP53_37   | - | GTGACCTATGCACCAGACGTGGGACCTCTTATCAAGTGGAAAGTTTCCAGTCTAACACAGATCGGAAGAGCGGTTTCAG           |
| chr17 | 7576969   | 7577008   | TP53_38   | - | GTGACCTATGCACCAGACGTAGGACAAGAAGCGGTTGGAGGAGACCAAGGGTGCAGTTATGAGATCGGAAGAGCGGTTTCAG        |
| chr17 | 7577449   | 7577488   | TP53_39   | - | GTGACCTATGCACCAGACGTACTTGCCACCCTGCACACTGGCCTGCTGTGCCCCAGCCTCAGATCGGAAGAGCGGTTTCAG         |
| chr17 | 7578127   | 7578166   | TP53_40   | - | GTGACCTATGCACCAGACGTCAACTGGGCTCTGAGGAGGAGGGTTAAGGGTGGTTGTCAGATCGGAAGAGCGGTTTCAG           |
| chr17 | 7578321   | 7578360   | TP53_41   | - | GTGACCTATGCACCAGACGTGGGGCTGGAGAGACGACAGGCGTGGTTGCCAGGGTCCCCAGGGTCCCCAGATCGGAAGAGCGGTTTCAG |
| chr17 | 7579262   | 7579301   | TP53_42   | - | GTGACCTATGCACCAGACGTCTGAGGGGCTGGCTTCCATGAGACTTCAATGCCTGGCCGTAGATCGGAAGAGCGGTTTCAG         |
| chr17 | 7579789   | 7579828   | TP53_43   | - | GTGACCTATGCACCAGACGTCCATTGGAAGGGCAGGCCACCACCCCAACCCCAAGATCGGAAGAGCGGTTTCAG                |
| chr3  | 178916564 | 178916603 | PIK3CA_44 | - | GTGACCTATGCACCAGACGTCTTTGCAAGTTTACATATAAACTACTTTAAGGAATTAGATCGGAAGAGCGGTTTCAG             |
| chr3  | 178917428 | 178917467 | PIK3CA_45 | - | GTGACCTATGCACCAGACGTATTACATAAAGAATATAAATCTTATTACATACACAGATAGATCGGAAGAGCGGTTTCAG           |
| chr3  | 178919028 | 178919067 | PIK3CA_46 | - | GTGACCTATGCACCAGACGTAAAAACATTAGATGCAATCACCATCTCTCTTTTCAATTTTCCAGATCGGAAGAGCGGTTTCAG       |
| chr3  | 178921282 | 178921321 | PIK3CA_47 | - | GTGACCTATGCACCAGACGTAAAGGGGGCGAGCCATTTCTGTAAGGTTTTTCAATTTTAAAGATCGGAAGAGCGGTTTCAG         |
| chr3  | 178922241 | 178922280 | PIK3CA_48 | - | GTGACCTATGCACCAGACGTAAAGTAGGTATATACTAATGTATACACTCAACATACACATAGATCGGAAGAGCGGTTTCAG         |
| chr3  | 178927924 | 178927963 | PIK3CA_49 | - | GTGACCTATGCACCAGACGTAAAGAAAAATATCTACTAGTCTAAATATAAAAAACATTTAGATCGGAAGAGCGGTTTCAG          |
| chr3  | 178928169 | 178928208 | PIK3CA_50 | - | GTGACCTATGCACCAGACGTGAAGAAAAGCTATTATATATACATAAGAGAGAAGGTTTGAAGATCGGAAGAGCGGTTTCAG         |
| chr3  | 178935948 | 178935987 | PIK3CA_51 | - | GTGACCTATGCACCAGACGTAAATAATATCTTATATAGCTTTCTTTGTCATATTTTCCAGATCGGAAGAGCGGTTTCAG           |
| chr3  | 178936934 | 178936973 | PIK3CA_52 | - | GTGACCTATGCACCAGACGTGAAAGAAAAATAAACATAAACATTTGCTGTTCCAAAAGATCGGAAGAGCGGTTTCAG             |
| chr3  | 178937309 | 178937348 | PIK3CA_53 | - | GTGACCTATGCACCAGACGTGAAAGACAATAAATCATATTTAAAGGGGAAAGATGTTGTAGATCGGAAGAGCGGTTTCAG          |
| chr3  | 178937687 | 178937726 | PIK3CA_54 | - | GTGACCTATGCACCAGACGTCCAAAAAAACAATCAGGGTCAGTTTCTGCATGGCCGATCAGATCGGAAGAGCGGTTTCAG          |
| chr3  | 178941819 | 178941858 | PIK3CA_55 | - | GTGACCTATGCACCAGACGTAAAAAGGATAGTACAGTAAGAAACTGACTTAATAAAAAGAAAGATCGGAAGAGCGGTTTCAG        |
| chr3  | 178942438 | 178942477 | PIK3CA_56 | - | GTGACCTATGCACCAGACGTGTTAAAAACTTTACTAGGTAACCTTTGCTTTATTATTATTAGATCGGAAGAGCGGTTTCAG         |
| chr3  | 178943700 | 178943739 | PIK3CA_57 | - | GTGACCTATGCACCAGACGTAAATAATATGATCACCATTTAATGCCAGATGCAAATTTAGATCGGAAGAGCGGTTTCAG           |
| chr3  | 178947010 | 178947049 | PIK3CA_58 | - | GTGACCTATGCACCAGACGTAGTAAACAGCTTTACAATTTAATGATGGAATTTTAAATAGATCGGAAGAGCGGTTTCAG           |

|       |           |           |           |   |                                                                                      |
|-------|-----------|-----------|-----------|---|--------------------------------------------------------------------------------------|
| chr3  | 178947742 | 178947781 | PIK3CA_59 | - | GTGACCTATGCACCAGACGTTAAACACCTCATGAGTAGTATGAAATATAGTGATTACAGGAGATCGGAAGAGCGGTTTCAG    |
| chr3  | 178947963 | 178948002 | PIK3CA_60 | - | GTGACCTATGCACCAGACGTTAAGAAATTATGTTATAGTTTGTATATCGCAGATACAAAAAGATCGGAAGAGCGGTTTCAG    |
| chr3  | 178951832 | 178951871 | PIK3CA_61 | - | GTGACCTATGCACCAGACGTTAAGAACAGTTTGGTCAGTTTGGAGCAAATGATGTTAATAAGATCGGAAGAGCGGTTTCAG    |
| chr13 | 48877999  | 48878038  | RB1_62    | - | GTGACCTATGCACCAGACGTCGCGGGGGGAGCCAGCGAGCTGTGGAGGAGCGCGGGGAGAGATCGGAAGAGCGGTTTCAG     |
| chr13 | 48881366  | 48881405  | RB1_63    | - | GTGACCTATGCACCAGACGTTAAATAATCATATAATTGGCATATACTTATAAATCAAATTAGATCGGAAGAGCGGTTTCAG    |
| chr13 | 48916685  | 48916724  | RB1_64    | - | GTGACCTATGCACCAGACGTTAAATAAAGATCAAATTTTCATTAATAATCACACACTAGATCGGAAGAGCGGTTTCAG       |
| chr13 | 48919166  | 48919205  | RB1_65    | - | GTGACCTATGCACCAGACGTTAAGAATAGAAAAAGTAAATCAGTAACCTTAAAAATTTGTAGATCGGAAGAGCGGTTTCAG    |
| chr13 | 48921911  | 48921950  | RB1_66    | - | GTGACCTATGCACCAGACGTTAAACATTATGACTTTTTTAACATTTTTTTCGTAATTTAGAAGAGATCGGAAGAGCGGTTTCAG |
| chr13 | 48923042  | 48923081  | RB1_67    | - | GTGACCTATGCACCAGACGTTAATGAAAGCAGAAAAAACAGGAAAAATGTATCACTGAAGATCGGAAGAGCGGTTTCAG      |
| chr13 | 48934103  | 48934142  | RB1_68    | - | GTGACCTATGCACCAGACGTTAATGTACATTTTTAAAGAAAGTTAGAGATTCAGATCTTTGAGATCGGAAGAGCGGTTTCAG   |
| chr13 | 48936901  | 48936940  | RB1_69    | - | GTGACCTATGCACCAGACGTTGTAATTTAGATAAGAACAATTTGATACATCCATCATATAAAAGATCGGAAGAGCGGTTTCAG  |
| chr13 | 48938980  | 48939019  | RB1_70    | - | GTGACCTATGCACCAGACGTTGAAGTTACAACATGATCATTAAAAATTTAAACAAAAATCTAGATCGGAAGAGCGGTTTCAG   |
| chr13 | 48941580  | 48941619  | RB1_71    | - | GTGACCTATGCACCAGACGTTAAAGTCAACTGACAATTTACTCTTTACATGTCTATTACATCTAGATCGGAAGAGCGGTTTCAG |
| chr13 | 48942613  | 48942652  | RB1_72    | - | GTGACCTATGCACCAGACGTATAAGTGAAGTCATTCACATACTGAAAAATTTACAATTTGTAGATCGGAAGAGCGGTTTCAG   |
| chr13 | 48947491  | 48947530  | RB1_73    | - | GTGACCTATGCACCAGACGTTAAAAATAGGAAAAATGTGTTAAGCAATGAAGGGAGAAAAAGATCGGAAGAGCGGTTTCAG    |
| chr13 | 48951004  | 48951043  | RB1_74    | - | GTGACCTATGCACCAGACGTTAAAAACAGAAATCAATGTCGAGGATACTGTGTAATCAGAAGATCGGAAGAGCGGTTTCAG    |
| chr13 | 48953719  | 48953758  | RB1_75    | - | GTGACCTATGCACCAGACGTACAAAAAATAAAGAGCCTGCTATTTTAGAAAAATCACAGATCGGAAGAGCGGTTTCAG       |
| chr13 | 48954139  | 48954178  | RB1_76    | - | GTGACCTATGCACCAGACGTTAATTTAAAAAATAAAGAAAGTTGTTTAAATTTGAAACCTAGATCGGAAGAGCGGTTTCAG    |
| chr13 | 48955333  | 48955372  | RB1_77    | - | GTGACCTATGCACCAGACGTTAAAAAAGTAACATTTTATGAAATTTAACCTTTGAGCAGATCGGAAGAGCGGTTTCAG       |
| chr13 | 49027079  | 49027118  | RB1_78    | - | GTGACCTATGCACCAGACGTCATGATGAAATTTAAACCACATTAGTAAGCATAATTTCCAGATCGGAAGAGCGGTTTCAG     |
| chr13 | 49030290  | 49030329  | RB1_79    | - | GTGACCTATGCACCAGACGTTTAAAGGAAAAGCTTTCATTTCAAGTTGGCTAAGAATCACAGATCGGAAGAGCGGTTTCAG    |
| chr13 | 49033774  | 49033813  | RB1_80    | - | GTGACCTATGCACCAGACGTTAAGAAAAATTAGTCATTTTTACTGTTTCATTTTGAATTTACAAGATCGGAAGAGCGGTTTCAG |
| chr13 | 49037817  | 49037856  | RB1_81    | - | GTGACCTATGCACCAGACGTTAATTTGATGTAAGTAGTCAGAATTTTATTACATGGTTTATAGATCGGAAGAGCGGTTTCAG   |
| chr13 | 49039291  | 49039330  | RB1_82    | - | GTGACCTATGCACCAGACGTTAACAAAAAGTAGATTTATTTAATGTTTTGGTGGACAGATCGGAAGAGCGGTTTCAG        |
| chr13 | 49047446  | 49047485  | RB1_83    | - | GTGACCTATGCACCAGACGTTAAGATGAAATACCAATTAGTAATAAAAAACCATATACAATAGATCGGAAGAGCGGTTTCAG   |
| chr13 | 49050787  | 49050826  | RB1_84    | - | GTGACCTATGCACCAGACGTCAGAATCTTTACTTTAAATCATTAAATGCCAGTGTTCAGATCGGAAGAGCGGTTTCAG       |
| chr13 | 49051441  | 49051480  | RB1_85    | - | GTGACCTATGCACCAGACGTTAAAAATGCAAAACATTTTCATGTGTTATATAAATGAAAGATCGGAAGAGCGGTTTCAG      |
| chr13 | 49054084  | 49054123  | RB1_86    | - | GTGACCTATGCACCAGACGTTGATGAAGAATGTTAACAGCATTGATGGTACTGGGTAAGTAGATCGGAAGAGCGGTTTCAG    |
| chr17 | 29482951  | 29482990  | NF1_87    | - | GTGACCTATGCACCAGACGTTAAGAAAAAACACGTTAACAGCTTATCTTAAAAACAGATCGGAAGAGCGGTTTCAG         |
| chr17 | 29485978  | 29486017  | NF1_88    | - | GTGACCTATGCACCAGACGTTAGATTTAGAACATTAAGATTTAGTTTACTTTCTGCTACAGATCGGAAGAGCGGTTTCAG     |
| chr17 | 29508390  | 29508429  | NF1_89    | - | GTGACCTATGCACCAGACGTCACAATTTTTAAAAATTAACCTCTAGAATAAGTTAACACAAGATCGGAAGAGCGGTTTCAG    |
| chr17 | 29508678  | 29508717  | NF1_90    | - | GTGACCTATGCACCAGACGTAGAACCACATGTCTTTACAGTGATTTTTTGTAAATACAGTAAGATCGGAAGAGCGGTTTCAG   |
| chr17 | 29509476  | 29509515  | NF1_91    | - | GTGACCTATGCACCAGACGTTAATATATAAATGACATTATTAGATAGGAACAAAATCCCTAGATCGGAAGAGCGGTTTCAG    |
| chr17 | 29527390  | 29527429  | NF1_92    | - | GTGACCTATGCACCAGACGTTCAATATAGCGATAAGATAATATAGAAATTTCTTCTATTAGATCGGAAGAGCGGTTTCAG     |
| chr17 | 29528005  | 29528044  | NF1_93    | - | GTGACCTATGCACCAGACGTTCCAAACAGAAACAAAAGCTTTAAATACCCATGCAGTATAGATCGGAAGAGCGGTTTCAG     |
| chr17 | 29528379  | 29528418  | NF1_94    | - | GTGACCTATGCACCAGACGTAGAAAAAAGCAGATTATTTCTATGAGAAAAATACTCAGATCGGAAGAGCGGTTTCAG        |
| chr17 | 29533208  | 29533247  | NF1_95    | - | GTGACCTATGCACCAGACGTACAAAGACCAATAGGAAGAAAAAGTACAAAATTACGTGAGAGATCGGAAGAGCGGTTTCAG    |
| chr17 | 29541419  | 29541458  | NF1_96    | - | GTGACCTATGCACCAGACGTTAACAAAAACATGGTATCAGACATAAGACTCAGGATAATAGAGATCGGAAGAGCGGTTTCAG   |
| chr17 | 29548818  | 29548857  | NF1_97    | - | GTGACCTATGCACCAGACGTTAAAAAGAGAAAGACAAAAGAGACTCACTCAAACATTAGATCGGAAGAGCGGTTTCAG       |
| chr17 | 29550412  | 29550451  | NF1_98    | - | GTGACCTATGCACCAGACGTATAAAGTTTCATTGTTACTAGCATCATCAATACCTAATGCAGATCGGAAGAGCGGTTTCAG    |
| chr17 | 29552063  | 29552102  | NF1_99    | - | GTGACCTATGCACCAGACGTATAAATAAATGAAAGCTTTTAAAGCACTGACAACCAAGAGATCGGAAGAGCGGTTTCAG      |
| chr17 | 29553403  | 29553442  | NF1_100   | - | GTGACCTATGCACCAGACGTAGGGTGAAGACATATATTTGCAACTTTGGGTAATTTTATGAGATCGGAAGAGCGGTTTCAG    |
| chr17 | 29554186  | 29554225  | NF1_101   | - | GTGACCTATGCACCAGACGTACAAACAGCAAAATCAAGTTACTGCACCTTAGAGCCCTGCCTGAGATCGGAAGAGCGGTTTCAG |
| chr17 | 29554491  | 29554530  | NF1_102   | - | GTGACCTATGCACCAGACGTTGGCAATTTACTTTGAAAGCAACTTAGTCTAGAGCTAAACAGATCGGAAGAGCGGTTTCAG    |
| chr17 | 29555993  | 29556032  | NF1_103   | - | GTGACCTATGCACCAGACGTTAATTTGTGCAAAAGCATGAATTTAAACCTTAAATAGTTGAAGATCGGAAGAGCGGTTTCAG   |
| chr17 | 29556803  | 29556842  | NF1_104   | - | GTGACCTATGCACCAGACGTAAACAAATGATTAATGATTTGCCATCAATGCCAGAAGACAGATCGGAAGAGCGGTTTCAG     |
| chr17 | 29557228  | 29557267  | NF1_105   | - | GTGACCTATGCACCAGACGTATAGAAACAATAAAAAATTTATCAGATATAGACAAAAGAGATCGGAAGAGCGGTTTCAG      |
| chr17 | 29557810  | 29557849  | NF1_106   | - | GTGACCTATGCACCAGACGTTGGAGAAAAAGAGAAACAGCAAAATGTTTTTGAAGCCAAGATCGGAAGAGCGGTTTCAG      |
| chr17 | 29559668  | 29559707  | NF1_107   | - | GTGACCTATGCACCAGACGTTAAAGACTGACCTTTACATAGTGAAGGCCGTATCAACTAGAGATCGGAAGAGCGGTTTCAG    |
| chr17 | 29559970  | 29560009  | NF1_108   | - | GTGACCTATGCACCAGACGTTCAACAGATGCAAAATTTACTAACATGGCCTTGCTGAAGTAAGATCGGAAGAGCGGTTTCAG   |
| chr17 | 29562579  | 29562618  | NF1_109   | - | GTGACCTATGCACCAGACGTTAAACAAATCAGTTAGTGCAAAACATCCCATTTTATTTTATGATCGGAAGAGCGGTTTCAG    |
| chr17 | 29562886  | 29562925  | NF1_110   | - | GTGACCTATGCACCAGACGTTGACGCAATAGGAGTTTATATACCTGCTCCATATATTTTAAAGATCGGAAGAGCGGTTTCAG   |
| chr17 | 29575952  | 29575991  | NF1_111   | - | GTGACCTATGCACCAGACGTATAAAAAATAAATCCTAACACTTTTTGTTTAAAAACAATAAAGATCGGAAGAGCGGTTTCAG   |
| chr17 | 29579906  | 29579945  | NF1_112   | - | GTGACCTATGCACCAGACGTGAGATGAGCACAACAAGTCACAGCACCGACTACATACAGATCGGAAGAGCGGTTTCAG       |
| chr17 | 29585312  | 29585351  | NF1_113   | - | GTGACCTATGCACCAGACGTTGGAGTTGAGAATTGAGTATAAGGTTTTGAATTAATAAAGAGATCGGAAGAGCGGTTTCAG    |
| chr17 | 29586000  | 29586039  | NF1_114   | - | GTGACCTATGCACCAGACGTTAAACAGGGTTATAAATAATCAGATTATTTATTGTATGAAGAGATCGGAAGAGCGGTTTCAG   |
| chr17 | 29587337  | 29587376  | NF1_115   | - | GTGACCTATGCACCAGACGTTCAAAAGCTAGAAATTTCAACACAGATACCCAGACAGATCGGAAGAGCGGTTTCAG         |
| chr17 | 29588679  | 29588718  | NF1_116   | - | GTGACCTATGCACCAGACGTTCAAACTACTTTAGAAAAAATTTAGCAGTTTCACATTTAGCAAGATCGGAAGAGCGGTTTCAG  |

|       |           |           |          |   |                                                                                      |
|-------|-----------|-----------|----------|---|--------------------------------------------------------------------------------------|
| chr17 | 29592197  | 29592236  | NF1_117  | - | GTGACCTATGCACCAGACGTAATAACAGAGTAATTATGAGGCTTTATGTTGTCTACTGAGAGATCGGAAGAGCGGTTTCAG    |
| chr17 | 29652788  | 29652827  | NF1_118  | - | GTGACCTATGCACCAGACGTTGACAAAAAAGACAAGGATTTATAGCAGTGTTTAAAATAAAGATCGGAAGAGCGGTTTCAG    |
| chr17 | 29654467  | 29654506  | NF1_119  | - | GTGACCTATGCACCAGACGTGTGGTGACGGGGTGAAGTGGAGAAGAATAAACTCTTTTAAAGATCGGAAGAGCGGTTTCAG    |
| chr17 | 29657264  | 29657303  | NF1_120  | - | GTGACCTATGCACCAGACGTACACAAATGAAGTTGTTTTAAAACGTATTTTTCTTATAGAGATCGGAAGAGCGGTTTCAG     |
| chr17 | 29661806  | 29661845  | NF1_121  | - | GTGACCTATGCACCAGACGTATACACTATTAGCATGTGATGGTCAATGAAAATCACATCAAGATCGGAAGAGCGGTTTCAG    |
| chr17 | 29664336  | 29664375  | NF1_122  | - | GTGACCTATGCACCAGACGTATAAAGGAACAAGTAAAGACAGAAAATATTACTTTTTTAATAGATCGGAAGAGCGGTTTCAG   |
| chr17 | 29664787  | 29664826  | NF1_123  | - | GTGACCTATGCACCAGACGTGGATACTGTAATACATTTGTACATAAATGTTTTAGAAAAGATCGGAAGAGCGGTTTCAG      |
| chr17 | 29665672  | 29665711  | NF1_124  | - | GTGACCTATGCACCAGACGTAACAGAATTTTTTATTTTACTTTTCATTGAAATAAAACATTAGATCGGAAGAGCGGTTTCAG   |
| chr17 | 29667473  | 29667512  | NF1_125  | - | GTGACCTATGCACCAGACGTAGATATGTTTGGGCTAGTAAGATGAATCATGACATAGTCAGATCGGAAGAGCGGTTTCAG     |
| chr17 | 29669977  | 29670016  | NF1_126  | - | GTGACCTATGCACCAGACGTTAATCATGAGATGGTTGATGAGGTTACACAGTAGCTTTTCAGATCGGAAGAGCGGTTTCAG    |
| chr17 | 29677151  | 29677190  | NF1_127  | - | GTGACCTATGCACCAGACGTAACGGTGGCAGGTTAAAAAATTTAACAAATCACAAGTGTGAGATCGGAAGAGCGGTTTCAG    |
| chr17 | 29679225  | 29679264  | NF1_128  | - | GTGACCTATGCACCAGACGTAAAAATAAGAGAAAAATCAATTAATATGTGTGACAAATACAGATCGGAAGAGCGGTTTCAG    |
| chr17 | 29683428  | 29683467  | NF1_129  | - | GTGACCTATGCACCAGACGTAAGTTAAGAATTCGCAAGTTCACTTAACACTACAGTGCTATAAGATCGGAAGAGCGGTTTCAG  |
| chr17 | 29683928  | 29683967  | NF1_130  | - | GTGACCTATGCACCAGACGTATAGGGAATTAACGTGATCAAAACCTGGATAATCACTTCAGATCGGAAGAGCGGTTTCAG     |
| chr17 | 29684237  | 29684276  | NF1_131  | - | GTGACCTATGCACCAGACGTGCAAAAAAGTAAACACACAACATTTTACTTTTGTGGCTGAAGATCGGAAGAGCGGTTTCAG    |
| chr17 | 29685448  | 29685487  | NF1_132  | - | GTGACCTATGCACCAGACGTAAAAAAGTCAACACAGGAAACATTTTAGAGGAAAAATTAATAGATCGGAAGAGCGGTTTCAG   |
| chr17 | 29685937  | 29685976  | NF1_133  | - | GTGACCTATGCACCAGACGTTCAAATTTTACTCTTATAACAAGCAAGGTATCTTTAATTAGATCGGAAGAGCGGTTTCAG     |
| chr17 | 29687455  | 29687494  | NF1_134  | - | GTGACCTATGCACCAGACGTAAGTAAAGGAAATTTTACTTCTTTTTTAAAGTAAATCAGATCGGAAGAGCGGTTTCAG       |
| chr17 | 29700981  | 29701020  | NF1_135  | - | GTGACCTATGCACCAGACGTTAGAGAAGCCAGTTACTTCTTCTTTTCTTCCAGGACTGAGATCGGAAGAGCGGTTTCAG      |
| chr7  | 116339089 | 116339128 | MET_136  | - | GTGACCTATGCACCAGACGTTTATCTGCCAAAACAGGTTCAAGGCGAGAGCAGTTTCAGTTAGATCGGAAGAGCGGTTTCAG   |
| chr7  | 116371672 | 116371711 | MET_137  | - | GTGACCTATGCACCAGACGTATATGGTCATAGAGTTAATGTGAATCCAGACATGAACAAGAGATCGGAAGAGCGGTTTCAG    |
| chr7  | 116379954 | 116379993 | MET_138  | - | GTGACCTATGCACCAGACGTTAAAAAGTTATAACATCCTTATTCCAACAAGCTCAGTTTAAAGATCGGAAGAGCGGTTTCAG   |
| chr7  | 116380856 | 116380895 | MET_139  | - | GTGACCTATGCACCAGACGTAAGGGGTGGAAGAGCTCCAGAGGGGTATCTAGTTTGTAGATCGGAAGAGCGGTTTCAG       |
| chr7  | 116395359 | 116395398 | MET_140  | - | GTGACCTATGCACCAGACGTAAACATAGAACTTTTAAAAAACCCAAATATATAATTTAGATCGGAAGAGCGGTTTCAG       |
| chr7  | 116397441 | 116397480 | MET_141  | - | GTGACCTATGCACCAGACGTAACCCAAAGTTTAAATACATGACAAATCCAAGGAATTTTCTAGATCGGAAGAGCGGTTTCAG   |
| chr7  | 116397642 | 116397681 | MET_142  | - | GTGACCTATGCACCAGACGTGATAAAAAACAAAACAAAGTAACTTGTTCATCTTATAATTTAGATCGGAAGAGCGGTTTCAG   |
| chr7  | 116398463 | 116398502 | MET_143  | - | GTGACCTATGCACCAGACGTAAAAATTAAGGAAGTGAATTTTAGCTATTAGAGATACACATTAGATCGGAAGAGCGGTTTCAG  |
| chr7  | 116399341 | 116399380 | MET_144  | - | GTGACCTATGCACCAGACGTGGGATTCAAATTTAATCACCTGCACTGATTACAGGTCAGAGAGATCGGAAGAGCGGTTTCAG   |
| chr7  | 116399395 | 116399434 | MET_145  | - | GTGACCTATGCACCAGACGTAAGATGAAACTGACATGTTGAGAGGTTCTTCCACCAAGATCGGAAGAGCGGTTTCAG        |
| chr7  | 116403054 | 116403093 | MET_146  | - | GTGACCTATGCACCAGACGTACACAATTTCCACTGTAAACACAGAATACAGCTTGGCAACAAGATCGGAAGAGCGGTTTCAG   |
| chr7  | 116409649 | 116409688 | MET_147  | - | GTGACCTATGCACCAGACGTAAAAAAAAAAAGGTTGTTAACACTTCACAGTTCTGCAGAGATCGGAAGAGCGGTTTCAG      |
| chr7  | 116411502 | 116411541 | MET_148  | - | GTGACCTATGCACCAGACGTCAAATAAAGAAAAGTCAAGCATTAGCCATGATAGATTTAGATCGGAAGAGCGGTTTCAG      |
| chr7  | 116411853 | 116411892 | MET_149  | - | GTGACCTATGCACCAGACGTAGAGAAAAGAAAGGCTTGTAAAGACGGCTATCATGGCCAGATCGGAAGAGCGGTTTCAG      |
| chr7  | 116414885 | 116414924 | MET_150  | - | GTGACCTATGCACCAGACGTAAGGAAATTTAAAGAACACACAGTAAACCTCATTTAAAGATCGGAAGAGCGGTTTCAG       |
| chr7  | 116417393 | 116417432 | MET_151  | - | GTGACCTATGCACCAGACGTGAAAAGAACTTGGTTGACTCGCTGAACATTTAATTGAAAAGATCGGAAGAGCGGTTTCAG     |
| chr7  | 116418780 | 116418819 | MET_152  | - | GTGACCTATGCACCAGACGTCAAGTGGTGGAGACATTAACCTCATTATGGAACAGTGAATAAGATCGGAAGAGCGGTTTCAG   |
| chr7  | 116421992 | 116422031 | MET_153  | - | GTGACCTATGCACCAGACGTAGAGAGTTAGAAAAGCATAAACTAAGCATCTACTGTTCTAAGATCGGAAGAGCGGTTTCAG    |
| chr7  | 116423308 | 116423347 | MET_154  | - | GTGACCTATGCACCAGACGTGACAAAAATTTACCCGTTGGCTGAAATAGAATAATTTACAGATCGGAAGAGCGGTTTCAG     |
| chr7  | 116435659 | 116435698 | MET_155  | - | GTGACCTATGCACCAGACGTAAGAAACAGGACAGATGAGGTGAGAGATGTACCATACATAGATCGGAAGAGCGGTTTCAG     |
| chr7  | 116435891 | 116435930 | MET_156  | - | GTGACCTATGCACCAGACGTAAGAAAGACATGCTGTAAGAGACCTTTGAAGGCAGGCATAGATCGGAAGAGCGGTTTCAG     |
| chr7  | 116339489 | 116339528 | MET_157  | - | GTGACCTATGCACCAGACGTGAAGTTGATCATAGTAGTGTGTCGACAACATAGAGCCATGATCGGAAGAGCGGTTTCAG      |
| chr7  | 116339889 | 116339928 | MET_158  | - | GTGACCTATGCACCAGACGTCCGTCAAGAAGTAAATAAAATTTGTTGCTTCAAAGGCATGAGATCGGAAGAGCGGTTTCAG    |
| chr12 | 58142258  | 58142297  | CDK4_159 | - | GTGACCTATGCACCAGACGTGGCTGCCATGGAAGGAAAGAAAGCTGCCATTTCCCTTCTGAGATCGGAAGAGCGGTTTCAG    |
| chr12 | 58142915  | 58142954  | CDK4_160 | - | GTGACCTATGCACCAGACGTTGGCTGTGGGCGACAGGGAAAAGAAATAGAGACTGGGGAAAAGAGATCGGAAGAGCGGTTTCAG |
| chr12 | 58143187  | 58143226  | CDK4_161 | - | GTGACCTATGCACCAGACGTAACATGGGAGAAAAGATTTTCTATTCTGAGTCCCTCTTTCAGATCGGAAGAGCGGTTTCAG    |
| chr12 | 58144389  | 58144428  | CDK4_162 | - | GTGACCTATGCACCAGACGTACATACCTGGACTACCTTGAATCCCAAATCGCTTTGATAGATCGGAAGAGCGGTTTCAG      |
| chr12 | 58144656  | 58144695  | CDK4_163 | - | GTGACCTATGCACCAGACGTAGATGGTACCAAATGGGTTCTGGTTGGGAGTAGGAGATAGATCGGAAGAGCGGTTTCAG      |
| chr12 | 58144940  | 58144979  | CDK4_164 | - | GTGACCTATGCACCAGACGTTTGGTAGGCATTGAGAGGTGGATTGGGACCTTTGTAGTAGATCGGAAGAGCGGTTTCAG      |
| chr12 | 58145233  | 58145272  | CDK4_165 | - | GTGACCTATGCACCAGACGTGGTGAGGGTTGGGCGTGGGGAGTAAAGGAAAAGACAGCAGATCGGAAGAGCGGTTTCAG      |
| chr11 | 108098453 | 108098492 | ATM_166  | - | GTGACCTATGCACCAGACGTAAGGAAATAATAATGGGTTACTAATCACACTTATTTCAAAGATCGGAAGAGCGGTTTCAG     |
| chr11 | 108099855 | 108099894 | ATM_167  | - | GTGACCTATGCACCAGACGTACAAAATGCAATTTCCAGAACTCGTTGAATACTTAAATTAAGATCGGAAGAGCGGTTTCAG    |
| chr11 | 108106347 | 108106386 | ATM_168  | - | GTGACCTATGCACCAGACGTAAACAAATTAAGAAAACATAAAATTTGAACAAAAATAAAGATCGGAAGAGCGGTTTCAG      |
| chr11 | 108115465 | 108115504 | ATM_169  | - | GTGACCTATGCACCAGACGTACAAACAAGCTCAACTGGGTATAACAGGGGAAACAAACTGAGATCGGAAGAGCGGTTTCAG    |
| chr11 | 108117641 | 108117680 | ATM_170  | - | GTGACCTATGCACCAGACGTA AAAAT TAAATGTAATTTTATGTATGACTCTGTTTACAGATCGGAAGAGCGGTTTCAG     |
| chr11 | 108121378 | 108121417 | ATM_171  | - | GTGACCTATGCACCAGACGTAAAAAAGGATAATTTGAAAACATTTCCATCACATTAACAAGATCGGAAGAGCGGTTTCAG     |
| chr11 | 108122514 | 108122553 | ATM_172  | - | GTGACCTATGCACCAGACGTACAAAGGACAATTTGTAAAAGCAAGCTATTGGAGGGGCAAAGATCGGAAGAGCGGTTTCAG    |
| chr11 | 108123494 | 108123533 | ATM_173  | - | GTGACCTATGCACCAGACGTAACAAAAGCTTCACTTGAAGAACCAAGCCATGTA AAAAGATCGGAAGAGCGGTTTCAG      |
| chr11 | 108124491 | 108124530 | ATM_174  | - | GTGACCTATGCACCAGACGTTAAGATCTTTAATATATAAACCAAGTCACTAATGCTTTGAGATCGGAAGAGCGGTTTCAG     |

|       |           |           |            |   |                                                                                     |
|-------|-----------|-----------|------------|---|-------------------------------------------------------------------------------------|
| chr11 | 108128158 | 108128197 | ATM_175    | - | GTGACCTATGCACCAGACGTTAGAAGGAAAAATGCAAAATCCAGTTAAAATTATAGTTTAAAGATCGGAAGAGCGGTTTCAG  |
| chr11 | 108129663 | 108129702 | ATM_176    | - | GTGACCTATGCACCAGACGTGACAACCAAGAACCAAGCAACAAGAAATAAAAAACAATTAGATCGGAAGAGCGGTTTCAG    |
| chr11 | 108137848 | 108137887 | ATM_177    | - | GTGACCTATGCACCAGACGTGAGAAAACAAAGATGTTCAAGATGGCTTCTGCAGGAGCATAGATCGGAAGAGCGGTTTCAG   |
| chr11 | 108139087 | 108139126 | ATM_178    | - | GTGACCTATGCACCAGACGTAAAGCACTCATTAACTAAGAGAAGGGCACAAACAGCCATAGATCGGAAGAGCGGTTTCAG    |
| chr11 | 108141741 | 108141780 | ATM_179    | - | GTGACCTATGCACCAGACGTAGGAGGGAAAAAATCAGGTTTATCCACAAATCATTACTAGATCGGAAGAGCGGTTTCAG     |
| chr11 | 108141928 | 108141967 | ATM_180    | - | GTGACCTATGCACCAGACGTAAAAAAGTTCAACTTTATAAGCTTAACAGAACACAGATCGGAAGAGCGGTTTCAG         |
| chr11 | 108143209 | 108143248 | ATM_181    | - | GTGACCTATGCACCAGACGTAAAGTTTTCCAAAGTTAAATAATCATTCTGATAAAAGCAAGATCGGAAGAGCGGTTTCAG    |
| chr11 | 108143399 | 108143438 | ATM_182    | - | GTGACCTATGCACCAGACGTAGAAGTGTGGTTAAATGAAATAGAGAAAAATTACTIONATAGATCGGAAGAGCGGTTTCAG   |
| chr11 | 108151672 | 108151711 | ATM_183    | - | GTGACCTATGCACCAGACGTAAATAAAAAAGTAAATGTAATGTAATGTAATGTTTAAACAGATCGGAAGAGCGGTTTCAG    |
| chr11 | 108153387 | 108153426 | ATM_184    | - | GTGACCTATGCACCAGACGTCAAAAAGTCAATGTGTTAAGAAAAATGAAAAAATAAATCAGATCGGAAGAGCGGTTTCAG    |
| chr11 | 108154904 | 108154943 | ATM_185    | - | GTGACCTATGCACCAGACGTAAAAATTTAAATACAGGTTATATATAACTTTTCCAAGTAAGATCGGAAGAGCGGTTTCAG    |
| chr11 | 108158328 | 108158367 | ATM_186    | - | GTGACCTATGCACCAGACGTACCAACTCTCTGGTAATTAATAAGTATCAATAAGTATCAAGATCGGAAGAGCGGTTTCAG    |
| chr11 | 108159654 | 108159693 | ATM_187    | - | GTGACCTATGCACCAGACGTAAAGGAAAAAATCAGTCATCGTTTTAAAAAGTTTTGTAGATCGGAAGAGCGGTTTCAG      |
| chr11 | 108160279 | 108160318 | ATM_188    | - | GTGACCTATGCACCAGACGTAAACAGATTTAGTAAAAACTGTTTAAATAGATACTCGGCTAGATCGGAAGAGCGGTTTCAG   |
| chr11 | 108163296 | 108163335 | ATM_189    | - | GTGACCTATGCACCAGACGTGAGAAAAAACAACAACAACAGTAAGTTCTGGAAAAATAGATCGGAAGAGCGGTTTCAG      |
| chr11 | 108165604 | 108165643 | ATM_190    | - | GTGACCTATGCACCAGACGTAAATGTAACCTTGCTTTTAAACACGTATTGGTTAAGCCTGTGAGATCGGAAGAGCGGTTTCAG |
| chr11 | 108167964 | 108168003 | ATM_191    | - | GTGACCTATGCACCAGACGTTTTTTAAAAATAGTTTAACTAGCATGAAGACAACACTAGATCGGAAGAGCGGTTTCAG      |
| chr11 | 108170391 | 108170430 | ATM_192    | - | GTGACCTATGCACCAGACGTAAATCTTATTTAGTAGATCATAGGTAAAGAGATCATACAAGATCGGAAGAGCGGTTTCAG    |
| chr11 | 108172325 | 108172364 | ATM_193    | - | GTGACCTATGCACCAGACGTCAATTCAAATGCCTATCAAGTACACCAGTTATTAATCTTGAGATCGGAAGAGCGGTTTCAG   |
| chr11 | 108173530 | 108173569 | ATM_194    | - | GTGACCTATGCACCAGACGTAGGGATTAGAAAATGTAATAAGAGAAGTGGAAATCATTGAGATCGGAAGAGCGGTTTCAG    |
| chr11 | 108175352 | 108175391 | ATM_195    | - | GTGACCTATGCACCAGACGTCAACAATCCACCATAAGTGTGAGTAAAAATGAGTAAAGATCGGAAGAGCGGTTTCAG       |
| chr11 | 108178574 | 108178613 | ATM_196    | - | GTGACCTATGCACCAGACGTAAAAATCTCCCTCAGTCCAGGCATTCTTGCTTACACAAGATCGGAAGAGCGGTTTCAG      |
| chr11 | 108180837 | 108180876 | ATM_197    | - | GTGACCTATGCACCAGACGTATGAGATATAATGTCATTCATTTTTTAACTTCAATATCAGATCGGAAGAGCGGTTTCAG     |
| chr11 | 108183088 | 108183127 | ATM_198    | - | GTGACCTATGCACCAGACGTAAAGAACCTCTTTTTAATGAGAACATACTATTTGGAAGCAGATCGGAAGAGCGGTTTCAG    |
| chr11 | 108186500 | 108186539 | ATM_199    | - | GTGACCTATGCACCAGACGTGAAACAACAATAAATTGAAGAAGGAAAAAATCGGCTAAGATCGGAAGAGCGGTTTCAG      |
| chr11 | 108186688 | 108186727 | ATM_200    | - | GTGACCTATGCACCAGACGTAGATTGTAAAAATGCTTTGGGTTTTACACACACATACTAGATCGGAAGAGCGGTTTCAG     |
| chr11 | 108188050 | 108188089 | ATM_201    | - | GTGACCTATGCACCAGACGTGTTATTTGTTTTAAGTTAAGTAATCAAGATATCAACAAGATCGGAAGAGCGGTTTCAG      |
| chr11 | 108190631 | 108190670 | ATM_202    | - | GTGACCTATGCACCAGACGTAGTCAAAGAAAAAATATACTTAAAAACAGAACCTAAGAAGATCGGAAGAGCGGTTTCAG     |
| chr11 | 108191978 | 108192017 | ATM_203    | - | GTGACCTATGCACCAGACGTAAAGAAAAAGCACTCTGAAATAAAGAAGGTTTTTCAGAGATCGGAAGAGCGGTTTCAG      |
| chr11 | 108195987 | 108196026 | ATM_204    | - | GTGACCTATGCACCAGACGTGCATAGAGTTCAATGTAAGCAAGAGAATGAAAAAATAAAGATCGGAAGAGCGGTTTCAG     |
| chr11 | 108196735 | 108196774 | ATM_205    | - | GTGACCTATGCACCAGACGTAAATGACATATGGGAATAAATACTTTTACTACTGATACTACAGATCGGAAGAGCGGTTTCAG  |
| chr11 | 108198322 | 108198361 | ATM_206    | - | GTGACCTATGCACCAGACGTAAAGGCAAAATCTTAAATATAATGCATTACCATGACTGTAAGATCGGAAGAGCGGTTTCAG   |
| chr11 | 108199698 | 108199737 | ATM_207    | - | GTGACCTATGCACCAGACGTACACAACCAATTTAAATTTATTTTACAAATACTAAATACAAGATCGGAAGAGCGGTTTCAG   |
| chr11 | 108200891 | 108200930 | ATM_208    | - | GTGACCTATGCACCAGACGTATAATTAAGTAAAAACAAAAAGCCATGAACTTTAAACAGAAGATCGGAAGAGCGGTTTCAG   |
| chr11 | 108202121 | 108202160 | ATM_209    | - | GTGACCTATGCACCAGACGTAAAAAAGACACAATAAATAAGAAACAAAGTATTTTCAAATATAGATCGGAAGAGCGGTTTCAG |
| chr11 | 108202556 | 108202595 | ATM_210    | - | GTGACCTATGCACCAGACGTAGAAGTATTAGATTTATGCAAATAAACAAAAAATAAATAGATCGGAAGAGCGGTTTCAG     |
| chr11 | 108203439 | 108203478 | ATM_211    | - | GTGACCTATGCACCAGACGTAAAAAACAACATTACATAAGGAACCTACCAACATTTAAAGATCGGAAGAGCGGTTTCAG     |
| chr11 | 108204563 | 108204602 | ATM_212    | - | GTGACCTATGCACCAGACGTAAATGAAGAGATTTTGTAGTACAAACTGAGGAACAGCATTGAGATCGGAAGAGCGGTTTCAG  |
| chr11 | 108205646 | 108205685 | ATM_213    | - | GTGACCTATGCACCAGACGTTATAACATGATTGATAATAGGTCAGATACACTATTTGCAAGATCGGAAGAGCGGTTTCAG    |
| chr11 | 108206522 | 108206561 | ATM_214    | - | GTGACCTATGCACCAGACGTAAAGCATGAATAAACAGTACAGTTATTTTATTATAAGATCGGAAGAGCGGTTTCAG        |
| chr11 | 108213899 | 108213938 | ATM_215    | - | GTGACCTATGCACCAGACGTAGATTAATAACCTTTTAAATTTTAAAGGCCATTAAAGAGCAGATCGGAAGAGCGGTTTCAG   |
| chr11 | 108216420 | 108216459 | ATM_216    | - | GTGACCTATGCACCAGACGTAGAATATATAATTTTTCATATTTGTTTCAATTAAGATCGGAAGAGCGGTTTCAG          |
| chr11 | 108217956 | 108217995 | ATM_217    | - | GTGACCTATGCACCAGACGTAAAGAAACAACAATCTGAAATCACTGATTCCATCTCTTTCAGATCGGAAGAGCGGTTTCAG   |
| chr11 | 108224443 | 108224482 | ATM_218    | - | GTGACCTATGCACCAGACGTGAATACAGTGAAGTTAGGAGGTTTTGACAGCTAATTTACTTAGATCGGAAGAGCGGTTTCAG  |
| chr11 | 108225488 | 108225527 | ATM_219    | - | GTGACCTATGCACCAGACGTACACATATAAATACGGATTTGTTTACACCAATGTTGTAGATCGGAAGAGCGGTTTCAG      |
| chr11 | 108235759 | 108235798 | ATM_220    | - | GTGACCTATGCACCAGACGTAGAACATATGTTAAAGAACAATGATACATTTTAAATCAGATCGGAAGAGCGGTTTCAG      |
| chr11 | 108236002 | 108236041 | ATM_221    | - | GTGACCTATGCACCAGACGTAAACACAAGGTTTTCAGTGAGGTGAACAGTTTAAAGGCCATAGATCGGAAGAGCGGTTTCAG  |
| chr4  | 55124886  | 55124925  | PDGFRA_222 | - | GTGACCTATGCACCAGACGTAACTAGAAAAGTCAAAAGTCAACAGAAACAGCATTAGCAAAGATCGGAAGAGCGGTTTCAG   |
| chr4  | 55127212  | 55127251  | PDGFRA_223 | - | GTGACCTATGCACCAGACGTAAAGCACGCTCTGAATAGGATGCAGTCAGAAAGGACAGTCTAGATCGGAAGAGCGGTTTCAG  |
| chr4  | 55129784  | 55129823  | PDGFRA_224 | - | GTGACCTATGCACCAGACGTAAAAAGAATGAAGACTCTATTAGACATTAATTTACCTTTAGATCGGAAGAGCGGTTTCAG    |
| chr4  | 55131036  | 55131075  | PDGFRA_225 | - | GTGACCTATGCACCAGACGTGAACAAATCAAGGGCCTAAAAATCCACAGGATGCCAGGATCGGAAGAGCGGTTTCAG       |
| chr4  | 55133669  | 55133708  | PDGFRA_226 | - | GTGACCTATGCACCAGACGTAAAGTTTTCCATTAAATAATGATTACCACATATGGATCCGAGATCGGAAGAGCGGTTTCAG   |
| chr4  | 55136750  | 55136789  | PDGFRA_227 | - | GTGACCTATGCACCAGACGTAAAGTTTTGTTTCAACAAGCAGTAGCTAAGTAAGTTCCAAGATCGGAAGAGCGGTTTCAG    |
| chr4  | 55138511  | 55138550  | PDGFRA_228 | - | GTGACCTATGCACCAGACGTGAGAAAGAAGTCAGAAATGGAATAGCTCGTGTCCAGAACAAGATCGGAAGAGCGGTTTCAG   |
| chr4  | 55139654  | 55139693  | PDGFRA_229 | - | GTGACCTATGCACCAGACGTAAAGGGCCTAAGTATAGGGCAATTCCTGAGAGTCATGGCAGATCGGAAGAGCGGTTTCAG    |
| chr4  | 55140648  | 55140687  | PDGFRA_230 | - | GTGACCTATGCACCAGACGTAGAGAGAGGGCAATGAAAAGTTTCTGGCAGACATGCAGATCGGAAGAGCGGTTTCAG       |
| chr4  | 55140958  | 55140997  | PDGFRA_231 | - | GTGACCTATGCACCAGACGTCCAGACAGTAACTGGTGAATACCAAGTCCAGATCGGAAGAGCGGTTTCAG              |
| chr4  | 55143505  | 55143544  | PDGFRA_232 | - | GTGACCTATGCACCAGACGTGCAAGATCATTAAACACCAAAATCCAGACGCTCCTCAAGATCGGAAGAGCGGTTTCAG      |

|       |           |           |            |   |                                                                                      |
|-------|-----------|-----------|------------|---|--------------------------------------------------------------------------------------|
| chr4  | 55144013  | 55144052  | PDGFRA_233 | - | GTGACCTATGCACCAGACGTAATAAATCACATATCAGTCCAGCTGAGCTACCAACTTCCTAGATCGGAAGAGCGGTTTCAG    |
| chr4  | 55144479  | 55144518  | PDGFRA_234 | - | GTGACCTATGCACCAGACGTA AAAAGCCGTTAGGAGATGGGTATGAAAATGAAGAACAGAAAGATCGGAAGAGCGGTTTCAG  |
| chr4  | 55146433  | 55146472  | PDGFRA_235 | - | GTGACCTATGCACCAGACGTAGAAAGAGAAATCTTACCCAGGGTGCCCTTCTGAAGTGGTAGATCGGAAGAGCGGTTTCAG    |
| chr4  | 55151488  | 55151527  | PDGFRA_236 | - | GTGACCTATGCACCAGACGTGAAATTAATGTATTGGTGTGGCAGGCAGCAGGAAATCAAGATCGGAAGAGCGGTTTCAG      |
| chr4  | 55151958  | 55151997  | PDGFRA_237 | - | GTGACCTATGCACCAGACGTAAAGGAAGAAATGACTCAGGATCAAGCCATCTGTAGCTGAAAGATCGGAAGAGCGGTTTCAG   |
| chr4  | 55153547  | 55153586  | PDGFRA_238 | - | GTGACCTATGCACCAGACGTGGAGGGGACAGTTAAACCCATGTCTACTCACTGATGATCAGATCGGAAGAGCGGTTTCAG     |
| chr4  | 55154956  | 55154955  | PDGFRA_239 | - | GTGACCTATGCACCAGACGTAAACAAATAAACACACAGGACTAAACAAACGCTCAGTGCATTGAGATCGGAAGAGCGGTTTCAG |
| chr4  | 55155126  | 55155165  | PDGFRA_240 | - | GTGACCTATGCACCAGACGTAGAACTCAAGAGTGGGCACAGGGGGAAGTCTCAGGGCCCCAGATCGGAAGAGCGGTTTCAG    |
| chr4  | 55156430  | 55156469  | PDGFRA_241 | - | GTGACCTATGCACCAGACGTTCAATGAACATATTTAATCAAGTGTAAACAACCAACCTCAGATCGGAAGAGCGGTTTCAG     |
| chr4  | 55161242  | 55161281  | PDGFRA_242 | - | GTGACCTATGCACCAGACGTGAGAGAAGAGCAAATATTACAACCTCCTGCACAGAAC TAGAAGATCGGAAGAGCGGTTTCAG  |
| chr12 | 69202208  | 69202247  | MDM2_243   | - | GTGACCTATGCACCAGACGTGCGCGCTTGGAGTGGGGGTCCCTCAAGACTCCCCAGTTTCAGATCGGAAGAGCGGTTTCAG    |
| chr12 | 69202938  | 69202977  | MDM2_244   | - | GTGACCTATGCACCAGACGTAAAAAAGACACGATGAAAATCGGAAATCATGAAACATCTGAGATCGGAAGAGCGGTTTCAG    |
| chr12 | 69202942  | 69202981  | MDM2_245   | - | GTGACCTATGCACCAGACGTGGA AAAAAGACACGATGAAAATCTGAAAATCATGAAACAAGATCGGAAGAGCGGTTTCAG    |
| chr12 | 69207284  | 69207323  | MDM2_246   | - | GTGACCTATGCACCAGACGTAAAAGAAGTCTATTATACTTCCAAAATTATCCAGAACTAGATCGGAAGAGCGGTTTCAG      |
| chr12 | 69210542  | 69210581  | MDM2_247   | - | GTGACCTATGCACCAGACGTAATATGATTTCTGAGCATTAAGAAAAC TAAATGTTAGTTAGATCGGAAGAGCGGTTTCAG    |
| chr12 | 69214055  | 69214094  | MDM2_248   | - | GTGACCTATGCACCAGACGTGAAAAAATAAACAAGAGATGTACATTTTAGAATAAAGATCGGAAGAGCGGTTTCAG         |
| chr12 | 69218285  | 69218324  | MDM2_249   | - | GTGACCTATGCACCAGACGTAGGAAAAAATAAACAACAACCTTAAACATAACCAGTAAGATCGGAAGAGCGGTTTCAG       |
| chr12 | 69222501  | 69222540  | MDM2_250   | - | GTGACCTATGCACCAGACGTAAAGGAAAAAATAAATGCTGTACTGTGATTTAGAAAATAGATCGGAAGAGCGGTTTCAG      |
| chr12 | 69229559  | 69229598  | MDM2_251   | - | GTGACCTATGCACCAGACGTAAAAAATATATAACTTAATAAACATCACCTCTTGACCTCAGATCGGAAGAGCGGTTTCAG     |
| chr12 | 69230402  | 69230441  | MDM2_252   | - | GTGACCTATGCACCAGACGTACATTCATTAGCATCAATTCATCGCCCTATTTCCTTCAATAGATCGGAAGAGCGGTTTCAG    |
| chr12 | 69233004  | 69233043  | MDM2_253   | - | GTGACCTATGCACCAGACGTATAAGACACACAGTCAGTTTCTGTAACCCTTTAACTGCTCAGATCGGAAGAGCGGTTTCAG    |
| chr12 | 69233292  | 69233331  | MDM2_254   | - | GTGACCTATGCACCAGACGTTCTTCACTTTCTTGTGATTGTGAAGCTTGTGTAATTTTATAGATCGGAAGAGCGGTTTCAG    |
| chr5  | 112090538 | 112090577 | APC_255    | - | GTGACCTATGCACCAGACGTCTTGGACCTATAAGGTTAAAAAGGATTTTGAATTCAGTACTAGATCGGAAGAGCGGTTTCAG   |
| chr5  | 112101973 | 112102012 | APC_256    | - | GTGACCTATGCACCAGACGTGAACAATATTAACATTAAGTGAANTCTAAATAACTTCAAGAGATCGGAAGAGCGGTTTCAG    |
| chr5  | 112102836 | 112102875 | APC_257    | - | GTGACCTATGCACCAGACGTTAGAAAACAAGTTTTTATACAACAATTGCTTTAAGCAGTCTAGATCGGAAGAGCGGTTTCAG   |
| chr5  | 112116437 | 112116476 | APC_258    | - | GTGACCTATGCACCAGACGTAATAATAAAAAAGTATCAATATCTGTATTTACGTTAATAGATCGGAAGAGCGGTTTCAG      |
| chr5  | 112136926 | 112136965 | APC_259    | - | GTGACCTATGCACCAGACGTGGAGTTAACATCAGTACATGCAAAAATGGTGTAGGCTTTCAGATCGGAAGAGCGGTTTCAG    |
| chr5  | 112151142 | 112151181 | APC_260    | - | GTGACCTATGCACCAGACGTAGCACATTTATAGATGGTATAATTTAGACTATAGGTAAATAAGATCGGAAGAGCGGTTTCAG   |
| chr5  | 112154613 | 112154652 | APC_261    | - | GTGACCTATGCACCAGACGTAATGATTTAGAAAACAAAATACGACTTTAATATCCAAAAGATCGGAAGAGCGGTTTCAG      |
| chr5  | 112157543 | 112157582 | APC_262    | - | GTGACCTATGCACCAGACGTA AATCAACATAAACCAATGCTTTGTTATTTGAAGAGCAAGATCGGAAGAGCGGTTTCAG     |
| chr5  | 112162755 | 112162794 | APC_263    | - | GTGACCTATGCACCAGACGTAAGGGCAAGAGGAAAAAGACAATCATCTAAAATAAAAACAAGATCGGAAGAGCGGTTTCAG    |
| chr5  | 112163576 | 112163615 | APC_264    | - | GTGACCTATGCACCAGACGTAATACAGAATAGAGGATCATTAAAAAGACAACCTTGAAGCCAGATCGGAAGAGCGGTTTCAG   |
| chr5  | 112164503 | 112164542 | APC_265    | - | GTGACCTATGCACCAGACGTATCAATTTTATAGTTAATTTATACATAAATCATACTAGTTAGATCGGAAGAGCGGTTTCAG    |
| chr5  | 112170598 | 112170637 | APC_266    | - | GTGACCTATGCACCAGACGTACAGAATAGGTCATCTAATAGATTTGGAATTTGCTCAGATCGGAAGAGCGGTTTCAG        |
| chr5  | 112173200 | 112173239 | APC_267    | - | GTGACCTATGCACCAGACGTAACTGATACAGATACAAAATTAAGGTCAATGTGTATCGAGATCGGAAGAGCGGTTTCAG      |
| chr5  | 112173670 | 112173709 | APC_268    | - | GTGACCTATGCACCAGACGTATGTCGATTGGTGTCAAAAACATAATCACCATAGAGACTTAGATCGGAAGAGCGGTTTCAG    |
| chr5  | 112174140 | 112174179 | APC_269    | - | GTGACCTATGCACCAGACGTCTATCATTGAAGATCTCTTGTATTCTAATTTGGCATAAGAGATCGGAAGAGCGGTTTCAG     |
| chr5  | 112174610 | 112174649 | APC_270    | - | GTGACCTATGCACCAGACGTCATGATTAGAACCCTCGATTTGTTTCTGAACCATTTGGCAGATCGGAAGAGCGGTTTCAG     |
| chr5  | 112175080 | 112175119 | APC_271    | - | GTGACCTATGCACCAGACGTTGAACATCATCTTGA AAAACATATTGGAGTATCTTCTACAAGATCGGAAGAGCGGTTTCAG   |
| chr5  | 112175550 | 112175589 | APC_272    | - | GTGACCTATGCACCAGACGTGGTGGCATGTTTGTCCAGGCTATCGGAAGATCACTGGAGATCGGAAGAGCGGTTTCAG       |
| chr5  | 112176020 | 112176059 | APC_273    | - | GTGACCTATGCACCAGACGTTAAGTATGACTTTTGTGGCAGTGGCAAAAATAATACATTCAGATCGGAAGAGCGGTTTCAG    |
| chr5  | 112176490 | 112176529 | APC_274    | - | GTGACCTATGCACCAGACGTTATCTTTTTACACGGAAAGGCTTGTGACTTTTCCCTTTGAGATCGGAAGAGCGGTTTCAG     |
| chr5  | 112176960 | 112176999 | APC_275    | - | GTGACCTATGCACCAGACGTTTGGAGGTTAGTTCTGTGTGGCTGGTAACTTTAGCCCTGAGATCGGAAGAGCGGTTTCAG     |
| chr5  | 112177430 | 112177469 | APC_276    | - | GTGACCTATGCACCAGACGTTATCACCCCTTGAGTCTTGAAGGCTTTTTCTTTTTTGGCATAAGATCGGAAGAGCGGTTTCAG  |
| chr5  | 112177900 | 112177939 | APC_277    | - | GTGACCTATGCACCAGACGTGGGCTGTTCTACTTGGCCTGAAATTTCTGAATTAGATCGAAGATCGGAAGAGCGGTTTCAG    |
| chr5  | 112178370 | 112178409 | APC_278    | - | GTGACCTATGCACCAGACGTACTGTCTGTCTGAGATGTATGACATTTTTCCGAACAGATCGGAAGAGCGGTTTCAG         |
| chr5  | 112178840 | 112178879 | APC_279    | - | GTGACCTATGCACCAGACGTGTGCAATATCATGGCGCTTGTGCTTCCATCATTATAAGATCGGAAGAGCGGTTTCAG        |
| chr5  | 112179310 | 112179349 | APC_280    | - | GTGACCTATGCACCAGACGTAACACTGTCAATCACCGGGGGAGTATTACCTGTGGGAGATAGATCGGAAGAGCGGTTTCAG    |
| chr22 | 41488959  | 41488998  | EP300_281  | - | GTGACCTATGCACCAGACGTTTCGGAGATACAAGCGAGGAAAACCAAGAATCCTCAGGAAAAGATCGGAAGAGCGGTTTCAG   |
| chr22 | 41513141  | 41513180  | EP300_282  | - | GTGACCTATGCACCAGACGTAGGGAAAAGACAAAAGTCAAAAGTATGACAAAACCAAAAATAAGATCGGAAGAGCGGTTTCAG  |
| chr22 | 41521818  | 41521857  | EP300_283  | - | GTGACCTATGCACCAGACGTGAAAACAAAAGAAAACAAAATAAGCAATAAAATTAAGCAAGATCGGAAGAGCGGTTTCAG     |
| chr22 | 41523441  | 41523480  | EP300_284  | - | GTGACCTATGCACCAGACGTTAAACAATATTTAATGGATGAGTCAATAATGTGCTATTTAGATCGGAAGAGCGGTTTCAG     |
| chr22 | 41525844  | 41525883  | EP300_285  | - | GTGACCTATGCACCAGACGTGAAAACATATTTTTCAAGAGCAGGTTAATGTTTTACATAGATCGGAAGAGCGGTTTCAG      |
| chr22 | 41527342  | 41527381  | EP300_286  | - | GTGACCTATGCACCAGACGTCAAAAAGATATAGTATTACAAATTAATGCTGGTGAGAAAAAAGATCGGAAGAGCGGTTTCAG   |
| chr22 | 41531767  | 41531806  | EP300_287  | - | GTGACCTATGCACCAGACGTATGAAAATAACAGGAGACAAAATAAATACAACAGCCCAAGATCGGAAGAGCGGTTTCAG      |
| chr22 | 41533607  | 41533646  | EP300_288  | - | GTGACCTATGCACCAGACGTGGGTCAACAAATAGTTTTAGTGAAGAAAGTAGGAGAAGAGATCGGAAGAGCGGTTTCAG      |
| chr22 | 41536094  | 41536133  | EP300_289  | - | GTGACCTATGCACCAGACGTA AACTCAACTGTAAATCATGTACAGATTTAATTAAGATCGGAAGAGCGGTTTCAG         |
| chr22 | 41537002  | 41537041  | EP300_290  | - | GTGACCTATGCACCAGACGTTGTAAGTAAAATAAGGAGATGAGGAAAAAGAACTACAGATCGGAAGAGCGGTTTCAG        |

|       |           |           |            |   |                                                                                      |
|-------|-----------|-----------|------------|---|--------------------------------------------------------------------------------------|
| chr22 | 41542693  | 41542732  | EP300_291  | - | GTGACCTATGCACCAGACGTAAAGAGAAATAAGTATCTTTGCACCATCTTCCCTTAACCAAGATCGGAAGAGCGGTTTCAG    |
| chr22 | 41543791  | 41543830  | EP300_292  | - | GTGACCTATGCACCAGACGTGAGCAAAAATGTTAGATCTGAATGCCTTTGTGAAATTGAATAGATCGGAAGAGCGGTTTCAG   |
| chr22 | 41544992  | 41545031  | EP300_293  | - | GTGACCTATGCACCAGACGTAAAAAACACAAATCACCAAATGCTTCATTATAGTTATTAGATCGGAAGAGCGGTTTCAG      |
| chr22 | 41545715  | 41545754  | EP300_294  | - | GTGACCTATGCACCAGACGTAAAAACATAACAAGACAGCAATTCAGAACAGAATTAAGGAGATCGGAAGAGCGGTTTCAG     |
| chr22 | 41547787  | 41547826  | EP300_295  | - | GTGACCTATGCACCAGACGTAAAAAGGGGAAGTAGGTGAGACACACGCAGAGTCTGCCAAAGATCGGAAGAGCGGTTTCAG    |
| chr22 | 41548160  | 41548199  | EP300_296  | - | GTGACCTATGCACCAGACGTACGTAAGAATTTTTAGTATTCCAAGATATCTAGTTGGGAAGATCGGAAGAGCGGTTTCAG     |
| chr22 | 41550949  | 41550988  | EP300_297  | - | GTGACCTATGCACCAGACGTAAAAAGTGCAATTTGAAATTAGTTACCAATTAAAGCAGAAGAAAGATCGGAAGAGCGGTTTCAG |
| chr22 | 41553123  | 41553162  | EP300_298  | - | GTGACCTATGCACCAGACGTAAGTGACATCAAACTACTCAAGTCTCACTATTTTTACGAGATCGGAAGAGCGGTTTCAG      |
| chr22 | 41554366  | 41554405  | EP300_299  | - | GTGACCTATGCACCAGACGTAACCATTTGTTAAAAAGCACAGAGGCCTTAAGGACAAGCTAGATCGGAAGAGCGGTTTCAG    |
| chr22 | 41556596  | 41556635  | EP300_300  | - | GTGACCTATGCACCAGACGTGAAGGCCATACTGGGGTGAACGTGCCGTTCACACAACACAGATCGGAAGAGCGGTTTCAG     |
| chr22 | 41558677  | 41558716  | EP300_301  | - | GTGACCTATGCACCAGACGTAAAAAGGGACACAATGAGAAAAAGTGATAGAGATGAGCAATAGATCGGAAGAGCGGTTTCAG   |
| chr22 | 41560007  | 41560046  | EP300_302  | - | GTGACCTATGCACCAGACGTAGAGCCAATTCAAAATTAACCCAAACCTTAACCAAATGAGATCGGAAGAGCGGTTTCAG      |
| chr22 | 41562553  | 41562592  | EP300_303  | - | GTGACCTATGCACCAGACGTACCAAAAATTTGCTTACACAACCTTAGATAAACCCGTTGAATAGATCGGAAGAGCGGTTTCAG  |
| chr22 | 41564403  | 41564442  | EP300_304  | - | GTGACCTATGCACCAGACGTAAAAAGTTAAAAGTTACTGAGGTGCAAAATTTACTGTTGTTAAGATCGGAAGAGCGGTTTCAG  |
| chr22 | 41564675  | 41564714  | EP300_305  | - | GTGACCTATGCACCAGACGTGAGATGGTGGGGGAACCAACAATAACTCATTAGACTGGAGATCGGAAGAGCGGTTTCAG      |
| chr22 | 41565457  | 41565496  | EP300_306  | - | GTGACCTATGCACCAGACGTTGAAGAGAAATGAAGAGGAAAAAAAAGTCAGGTCACATAAGATCGGAAGAGCGGTTTCAG     |
| chr22 | 41566360  | 41566399  | EP300_307  | - | GTGACCTATGCACCAGACGTAAAGAGAAAGAACATTAAGGAAAAAGAGATAATCTATTCTAAGATCGGAAGAGCGGTTTCAG   |
| chr22 | 41568453  | 41568492  | EP300_308  | - | GTGACCTATGCACCAGACGTGCATGTACATATAGAAATTTCTATGTTCTTTTAAAGCAAGATCGGAAGAGCGGTTTCAG      |
| chr22 | 41569577  | 41569616  | EP300_309  | - | GTGACCTATGCACCAGACGTGCACAAAAGGAGACAAGAAAAAAGGTTTTTGTTAAGTAATAGATCGGAAGAGCGGTTTCAG    |
| chr22 | 41572727  | 41572766  | EP300_310  | - | GTGACCTATGCACCAGACGTAACAGGAGGTGCACGTAAACTCTCCAAGATTTAAGTCATTAGATCGGAAGAGCGGTTTCAG    |
| chr22 | 41513458  | 41513497  | EP300_311  | - | GTGACCTATGCACCAGACGTGGAGAGTCAAGCCTGCCTGTGTCATTGGGCTTTTGACCAAGATCGGAAGAGCGGTTTCAG     |
| chr22 | 41573164  | 41573203  | EP300_312  | - | GTGACCTATGCACCAGACGTTGCGAAGCATTTGGGCCTGCTGTAGTCCGGTCTGCAGCTGAGATCGGAAGAGCGGTTTCAG    |
| chr22 | 41573601  | 41573640  | EP300_313  | - | GTGACCTATGCACCAGACGTACTCTGGTCATGGGAGTGGGTTTCATACCCATGGGGCCAGATCGGAAGAGCGGTTTCAG      |
| chr22 | 41574038  | 41574077  | EP300_314  | - | GTGACCTATGCACCAGACGTTGACCTGGCATGGTAGGTGCTGTAGCCCTGGCTGCCCTCGAAGAGCGGTTTCAG           |
| chr22 | 41574475  | 41574514  | EP300_315  | - | GTGACCTATGCACCAGACGTGCTGAAGGAGTCTGCTGCTGATAGGCCCTGTAGACTGGCACCAGATCGGAAGAGCGGTTTCAG  |
| chr19 | 45854837  | 45854876  | ERCC2_316  | - | GTGACCTATGCACCAGACGTTGGGGCCATAAACGGTTCTCTGGTACTCCTGAGTCTTGCCAGATCGGAAGAGCGGTTTCAG    |
| chr19 | 45855417  | 45855456  | ERCC2_317  | - | GTGACCTATGCACCAGACGTGCTCCCCCTCCCGGCACCCTCCAGGCTGAGCTTCTCCTCAGATCGGAAGAGCGGTTTCAG     |
| chr19 | 45855714  | 45855753  | ERCC2_318  | - | GTGACCTATGCACCAGACGTAGGGGTGCCCTTGCTCCTCCATCCAGGCTCCAAGAACAAGATCGGAAGAGCGGTTTCAG      |
| chr19 | 45855954  | 45855993  | ERCC2_319  | - | GTGACCTATGCACCAGACGTCTGTCTCCAGGGAGTCCCACAGTGTAGGATCAAGGCAGATCGGAAGAGCGGTTTCAG        |
| chr19 | 45856291  | 45856330  | ERCC2_320  | - | GTGACCTATGCACCAGACGTTGGGCTTCTCTCCAGGTTCTTCCACAGACTCTCTGGAGATCGGAAGAGCGGTTTCAG        |
| chr19 | 45856450  | 45856489  | ERCC2_321  | - | GTGACCTATGCACCAGACGTGAGGCCAGCGTGGAGAGGGGTGGGAGGTTGGCTCTGAGGAGATCGGAAGAGCGGTTTCAG     |
| chr19 | 45857938  | 45857977  | ERCC2_322  | - | GTGACCTATGCACCAGACGTCCACCCCTCCCTGCACCTGCTCTCCTCAGTCCCTGGCACAGATCGGAAGAGCGGTTTCAG     |
| chr19 | 45860478  | 45860517  | ERCC2_323  | - | GTGACCTATGCACCAGACGTGAGGCTAGGGCTGGGGCCGGGAGGGGAGATGGGGGCAAGGAGATCGGAAGAGCGGTTTCAG    |
| chr19 | 45860682  | 45860721  | ERCC2_324  | - | GTGACCTATGCACCAGACGTTTTCCCGTCCCTCTAGTCCCTGACTCCCTCCATCCGATCGGAAGAGCGGTTTCAG          |
| chr19 | 45860838  | 45860877  | ERCC2_325  | - | GTGACCTATGCACCAGACGTGCCCGTGGCCGCTGTGAATGCTGTGGTGGTGGGGCCAAAGATCGGAAGAGCGGTTTCAG      |
| chr19 | 45864732  | 45864771  | ERCC2_326  | - | GTGACCTATGCACCAGACGTCTTTTTCTCTCTGCTGCTGGCCTCCTAGCAGCTGGAATCAAGATCGGAAGAGCGGTTTCAG    |
| chr19 | 45866951  | 45866990  | ERCC2_327  | - | GTGACCTATGCACCAGACGTAGACAGCGCGGGTGGGGGCCCGGCAGGTCCTGGTTATAGATCGGAAGAGCGGTTTCAG       |
| chr19 | 45867194  | 45867233  | ERCC2_328  | - | GTGACCTATGCACCAGACGTACCCCCCGCTGCCCCCGAGTCCCTTTCCCGCTCCCGTCCAGATCGGAAGAGCGGTTTCAG     |
| chr19 | 45867443  | 45867482  | ERCC2_329  | - | GTGACCTATGCACCAGACGTGGACGCTGGCGGTGGTGGCCCGCTGCCCTGGGACCCTAGATCGGAAGAGCGGTTTCAG       |
| chr19 | 45867632  | 45867671  | ERCC2_330  | - | GTGACCTATGCACCAGACGTGCCAGGGGCCAAGGGATGCCAGCCCTCTGATGAGGCAGATCGGAAGAGCGGTTTCAG        |
| chr19 | 45868250  | 45868289  | ERCC2_331  | - | GTGACCTATGCACCAGACGTGGCAGGGCTGAGGGAGGGAGGACAGGATGCTAGCTGGGGAGATCGGAAGAGCGGTTTCAG     |
| chr19 | 45871838  | 45871877  | ERCC2_332  | - | GTGACCTATGCACCAGACGTGTTCTTCTCTCTGCTGCTGGCCTCCTAGCAGCTGGAATCAAGATCGGAAGAGCGGTTTCAG    |
| chr19 | 45872138  | 45872177  | ERCC2_333  | - | GTGACCTATGCACCAGACGTACTCATCTGGTGTCCAGCCCACTGTTCCCTAGGCCCTAGATCGGAAGAGCGGTTTCAG       |
| chr19 | 45872278  | 45872317  | ERCC2_334  | - | GTGACCTATGCACCAGACGTGCTGAACCCGTAAGGCAGACAAAGGAAGGGGCGGGACAAGATCGGAAGAGCGGTTTCAG      |
| chr19 | 45873341  | 45873380  | ERCC2_335  | - | GTGACCTATGCACCAGACGTGGTGGGGCCAGCCGCCCACTGACCCGTTGGGGTGGCCACAGATCGGAAGAGCGGTTTCAG     |
| chr19 | 45873744  | 45873783  | ERCC2_336  | - | GTGACCTATGCACCAGACGTGGTGGGGTCCGCTGCTAGCGGGCGCGGGGGTCTTGATCGGAAGAGCGGTTTCAG           |
| chr12 | 25362679  | 25362718  | KRAS_337   | - | GTGACCTATGCACCAGACGTTACTTTTTCTTAAGGCATACTAGTACAAGTGGTAATTTTATAGATCGGAAGAGCGGTTTCAG   |
| chr12 | 25368325  | 25368364  | KRAS_338   | - | GTGACCTATGCACCAGACGTTTAAGTTCAGCACATTAATTTTGGCAGAAAGCAGATGTCTAGATCGGAAGAGCGGTTTCAG    |
| chr12 | 25378498  | 25378537  | KRAS_339   | - | GTGACCTATGCACCAGACGTCTGAAATAAATACAGATCTGTTTTCTGCAAAATCATAACTAGATCGGAAGAGCGGTTTCAG    |
| chr12 | 25380118  | 25380157  | KRAS_340   | - | GTGACCTATGCACCAGACGTATTGAATATAAAGCTGACATTAAGGAGTAATTTATAGTTAGATCGGAAGAGCGGTTTCAG     |
| chr12 | 25398158  | 25398197  | KRAS_341   | - | GTGACCTATGCACCAGACGTTTTAATATGCATTAAGTGGTCAGGACCATCTTTGATAGATCGGAAGAGCGGTTTCAG        |
| chr7  | 106507957 | 106507996 | PIK3CG_342 | - | GTGACCTATGCACCAGACGTACCTGGAGCGGAGGACAGGATTTGTCAAGAAGAGATCGGAAGAGCGGTTTCAG            |
| chr7  | 106512932 | 106512971 | PIK3CG_343 | - | GTGACCTATGCACCAGACGTAACACATTGGCATTTGAGGACTGTACTCTATGCTGTTGAAGATCGGAAGAGCGGTTTCAG     |
| chr7  | 106513108 | 106513147 | PIK3CG_344 | - | GTGACCTATGCACCAGACGTGTACAAGAAAGTTGAAATTATTGACTAATGCTTTAGGTAGATCGGAAGAGCGGTTTCAG      |
| chr7  | 106515095 | 106515134 | PIK3CG_345 | - | GTGACCTATGCACCAGACGTCAAAGTACACAAGAGTTATGTGAGTTCCAGAAATCATCAAGATCGGAAGAGCGGTTTCAG     |
| chr7  | 106519914 | 106519953 | PIK3CG_346 | - | GTGACCTATGCACCAGACGTGCAGTCACATATCCCCACACACAATGAATAACGAATATAAGATCGGAAGAGCGGTTTCAG     |
| chr7  | 106523428 | 106523467 | PIK3CG_347 | - | GTGACCTATGCACCAGACGTGCACAGAGTCTGATGGAGATTTGGGGCCAGACTCGGAGATCGGAAGAGCGGTTTCAG        |
| chr7  | 106524550 | 106524589 | PIK3CG_348 | - | GTGACCTATGCACCAGACGTGCATTTGAAATATTAGTTGCTTCTTAACACAAAAAGCATAGATCGGAAGAGCGGTTTCAG     |

|       |           |           |            |   |                                                                                          |
|-------|-----------|-----------|------------|---|------------------------------------------------------------------------------------------|
| chr7  | 106526530 | 106526569 | PIK3CG_349 | - | GTGACCTATGCACCAGACGTGAAAGTATCTGACATCATTACAGTGGCACAGCACTTTGTTAGATCGGAAGAGCGGTTTCAG        |
| chr7  | 106545504 | 106545543 | PIK3CG_350 | - | GTGACCTATGCACCAGACGTAAAGAAGAAAATGCTGTTACTGTTGTTATGGTAACTAACAAAGATCGGAAGAGCGGTTTCAG       |
| chr7  | 106508456 | 106508495 | PIK3CG_351 | - | GTGACCTATGCACCAGACGTAGTGACGTCATAGCCAATCAGCGCCGTGAGCTGCCGCTGGAGATCGGAAGAGCGGTTTCAG        |
| chr7  | 106508955 | 106508994 | PIK3CG_352 | - | GTGACCTATGCACCAGACGTTGCAGTCATCCACCAGTGGCCACTCTTCCTTCCCTCACCTCAGATCGGAAGAGCGGTTTCAG       |
| chr7  | 106509454 | 106509493 | PIK3CG_353 | - | GTGACCTATGCACCAGACGCTTCCCTTGGTCTTCTCCCTTCCAGATATCTGCCACATGTAGATCGGAAGAGCGGTTTCAG         |
| chr17 | 41197645  | 41197684  | BRCA1_354  | - | GTGACCTATGCACCAGACGTCCACAGGTACAGGCCACAGGACCCCAAGAATGAGCTTACAGATCGGAAGAGCGGTTTCAG         |
| chr17 | 41201088  | 41201127  | BRCA1_355  | - | GTGACCTATGCACCAGACGTGGTGCCTGTGCAGAGGCGAGGACACAATATTCTCTCCTGAGATCGGAAGAGCGGTTTCAG         |
| chr17 | 41203030  | 41203069  | BRCA1_356  | - | GTGACCTATGCACCAGACGTGGGAGAACCCAGAGTTCAGACCAGCCTTTGTCTTACAAGATCGGAAGAGCGGTTTCAG           |
| chr17 | 41209019  | 41209058  | BRCA1_357  | - | GTGACCTATGCACCAGACGTCTCCCTCAAGTTGACAAAAATCTACCCACCACCTCTGTAAGATCGGAAGAGCGGTTTCAG         |
| chr17 | 41215300  | 41215339  | BRCA1_358  | - | GTGACCTATGCACCAGACGTGATGTTACAAACTAACCCAGAGATATTCATTAGTATATAAGATCGGAAGAGCGGTTTCAG         |
| chr17 | 41215841  | 41215880  | BRCA1_359  | - | GTGACCTATGCACCAGACGTACTATTTCTCCCCTCTCCCTTTAACACCTCAGAATTCAGATCGGAAGAGCGGTTTCAG           |
| chr17 | 41219575  | 41219614  | BRCA1_360  | - | GTGACCTATGCACCAGACGTAACTTTACGAATACTTGCATCTGCTGCATAAAACCCAGATCGGAAGAGCGGTTTCAG            |
| chr17 | 41222895  | 41222934  | BRCA1_361  | - | GTGACCTATGCACCAGACGTCCATATGTATCTCCCTAATGACTAAGACTTAAACAACATTCAGATCGGAAGAGCGGTTTCAG       |
| chr17 | 41226298  | 41226337  | BRCA1_362  | - | GTGACCTATGCACCAGACGTATCTGCTGTATTGGAACAAACACTTTGATTTTACTCTGAAAGATCGGAAGAGCGGTTTCAG        |
| chr17 | 41228455  | 41228494  | BRCA1_363  | - | GTGACCTATGCACCAGACGTTCAATGTAAGATGCTGTGGTATCTGACATCTTTATTTATAGATCGGAAGAGCGGTTTCAG         |
| chr17 | 41234371  | 41234410  | BRCA1_364  | - | GTGACCTATGCACCAGACGTTTGGCCAAACACTGATATCTTAAGCAAAATTTCTTCCCTTCCAGATCGGAAGAGCGGTTTCAG      |
| chr17 | 41242911  | 41242950  | BRCA1_365  | - | GTGACCTATGCACCAGACGTTGTGTGTGTGCACATCGCGTGTGTGTGTGTCCTTTGCAAGATCGGAAGAGCGGTTTCAG          |
| chr17 | 41243402  | 41243441  | BRCA1_366  | - | GTGACCTATGCACCAGACGTGAGGTTTTTGTGTTTGGCCAGCTATTATAGAAGTAGAGATCGGAAGAGCGGTTTCAG            |
| chr17 | 41247813  | 41247852  | BRCA1_367  | - | GTGACCTATGCACCAGACGTAGTTTGCCAACTTAACAGGCACTGAAAAGAGAGTGGGTAGAGATCGGAAGAGCGGTTTCAG        |
| chr17 | 41249211  | 41249250  | BRCA1_368  | - | GTGACCTATGCACCAGACGTGAGAACCTTTGCTATGAAGCTGGTATTTTCTATTTAGTAGATCGGAAGAGCGGTTTCAG          |
| chr17 | 41251742  | 41251781  | BRCA1_369  | - | GTGACCTATGCACCAGACGTGAGTTTTTAAAGTATTTAATAAATTGCTGGATTCCCTTAGATCGGAAGAGCGGTTTCAG          |
| chr17 | 41256835  | 41256874  | BRCA1_370  | - | GTGACCTATGCACCAGACGTAATATCCCAAGAATGACACTCAAGTGTCTGCCATGAAAACAGATCGGAAGAGCGGTTTCAG        |
| chr17 | 41258423  | 41258462  | BRCA1_371  | - | GTGACCTATGCACCAGACGTTGTAATGATGCTAGTGTGAAGCAACACAGTAGGAAGAAAGATCGGAAGAGCGGTTTCAG          |
| chr17 | 41267693  | 41267732  | BRCA1_372  | - | GTGACCTATGCACCAGACGTAGTGTGCTGTGCTGCTTATTAGCTTTTGTGTTTGTCCAGATCGGAAGAGCGGTTTCAG           |
| chr17 | 41275984  | 41276023  | BRCA1_373  | - | GTGACCTATGCACCAGACGTACAAGAGTGATTAATTTGGGATTCCTATGATTATCTCCTAGATCGGAAGAGCGGTTTCAG         |
| chr17 | 41243860  | 41243899  | BRCA1_374  | - | GTGACCTATGCACCAGACGTTCTAGTGAGGATGAAGAGCTTCCCTGCTTCCAACACTGTAGATCGGAAGAGCGGTTTCAG         |
| chr17 | 41243891  | 41243930  | BRCA1_375  | - | GTGACCTATGCACCAGACGTCAAGAAATTAGAGTCCCTCAGAAGAGAACTTATCTAGTGAGAGATCGGAAGAGCGGTTTCAG       |
| chr17 | 41244318  | 41244357  | BRCA1_376  | - | GTGACCTATGCACCAGACGTGTGATGAAAACATTCAAGCAGAAGTAGGTAGAAAACAGAGGATCGGAAGAGCGGTTTCAG         |
| chr17 | 41244380  | 41244419  | BRCA1_377  | - | GTGACCTATGCACCAGACGTTATTAATGAAGTAGTTCAGACTAATGAAGTGGGCTCCAGATCGGAAGAGCGGTTTCAG           |
| chr17 | 41244776  | 41244815  | BRCA1_378  | - | GTGACCTATGCACCAGACGTAAAGAATGAGTCTAATATCAAGCCTGTACAGACAGTTAATAGATCGGAAGAGCGGTTTCAG        |
| chr17 | 41244869  | 41244908  | BRCA1_379  | - | GTGACCTATGCACCAGACGTGGAATGTGCAACATTCTCTGCCCACTCTGGTCCTTAAAGAGATCGGAAGAGCGGTTTCAG         |
| chr17 | 41245234  | 41245273  | BRCA1_380  | - | GTGACCTATGCACCAGACGTCAAACCTGAAAGATCTGTAGAGAGTAGCAGTATTTTATTGGAGATCGGAAGAGCGGTTTCAG       |
| chr17 | 41245358  | 41245397  | BRCA1_381  | - | GTGACCTATGCACCAGACGTACTTAAAGAATTTGCAATCCTAGCCTTCCAAGAGAAGAAAGATCGGAAGAGCGGTTTCAG         |
| chr17 | 41245692  | 41245731  | BRCA1_382  | - | GTGACCTATGCACCAGACGTTAAAAAGAATAGGCTGAGGAGGAAGCTTCTACCAGGCAAGATCGGAAGAGCGGTTTCAG          |
| chr17 | 41245847  | 41245886  | BRCA1_383  | - | GTGACCTATGCACCAGACGTGAATAAAACAAAAGGTGATTCTATTAGAATGAGAAAATAGATCGGAAGAGCGGTTTCAG          |
| chr17 | 41246150  | 41246189  | BRCA1_384  | - | GTGACCTATGCACCAGACGTGAGTAATATTGAAGACAAAATTTTGGGAAAACCTATCGGAGATCGGAAGAGCGGTTTCAG         |
| chr17 | 41246336  | 41246375  | BRCA1_385  | - | GTGACCTATGCACCAGACGTACTGTTAGGTTCTGATGACTCACATGATGGGGAGTCTGAAAGATCGGAAGAGCGGTTTCAG        |
| chr19 | 1206863   | 1206902   | STK11_386  | - | GTGACCTATGCACCAGACGTGGGTCTGGAGTCCCAGCCGCCAGCCCTGAGTCCGCGGGTGAATCGGAAGAGCGGTTTCAG         |
| chr19 | 1218366   | 1218405   | STK11_387  | - | GTGACCTATGCACCAGACGTGAGGACAGGGGTGTATCAGCCGACCCAACTCAGGATGATAGATCGGAAGAGCGGTTTCAG         |
| chr19 | 1219273   | 1219312   | STK11_388  | - | GTGACCTATGCACCAGACGTAAAGACACACAGCTCAGGGGCGGCCCCACTCACAGCCAGATCGGAAGAGCGGTTTCAG           |
| chr19 | 1220322   | 1220361   | STK11_389  | - | GTGACCTATGCACCAGACGTCAACACCCGCTCCTGGGCGGAGGCCTCCCTGCCCTCACAGATCGGAAGAGCGGTTTCAG          |
| chr19 | 1220530   | 1220569   | STK11_390  | - | GTGACCTATGCACCAGACGTGCCGTGCGCCCTCAGGGAGTGCCTGGGAGGGGGCGCCAGATCGGAAGAGCGGTTTCAG           |
| chr19 | 1221162   | 1221201   | STK11_391  | - | GTGACCTATGCACCAGACGTAGGGGAGGGAAGAAAGGCGTGGTCAAGGTGGTTGACAGATCGGAAGAGCGGTTTCAG            |
| chr19 | 1221898   | 1221937   | STK11_392  | - | GTGACCTATGCACCAGACGTGCCGCGGAGGAGCCTGTGAGTGGGCACAGGCCTGAGACCAGATCGGAAGAGCGGTTTCAG         |
| chr19 | 1222934   | 1222973   | STK11_393  | - | GTGACCTATGCACCAGACGTCCAGAAGCAGTGGCCGCTGTGAGGCTGCAGGTCGCCACCAGGGCGGTAGATCGGAAGAGCGGTTTCAG |
| chr19 | 1226403   | 1226442   | STK11_394  | - | GTGACCTATGCACCAGACGTGACCGCAAGTGTGGCCTGAGCTGAGGGGCGCAACCCAGAAAGATCGGAAGAGCGGTTTCAG        |
| chr13 | 32890548  | 32890587  | BRCA2_395  | - | GTGACCTATGCACCAGACGTGATATTCCTCCAATGCTTGGTAAATAAGTCTGCAAAAACAGAGATCGGAAGAGCGGTTTCAG       |
| chr13 | 32893164  | 32893203  | BRCA2_396  | - | GTGACCTATGCACCAGACGTAAAAAATCCCACCTTAGTTTTAAACAGTGACAGACAAATTAGATCGGAAGAGCGGTTTCAG        |
| chr13 | 32900188  | 32900227  | BRCA2_397  | - | GTGACCTATGCACCAGACGTACAAAGCAAATCCCTTAGGTTATTTAAAAAACTGGCAAAAGATCGGAAGAGCGGTTTCAG         |
| chr13 | 32900329  | 32900368  | BRCA2_398  | - | GTGACCTATGCACCAGACGTAAAAAGGGGAAAATTTGTTAAGTTTTATTTTATTAACATTAGATCGGAAGAGCGGTTTCAG        |
| chr13 | 32900586  | 32900625  | BRCA2_399  | - | GTGACCTATGCACCAGACGTAGAAAATAGTTTATTTTATAGAAATCCCTGATCATAAGATCGGAAGAGCGGTTTCAG            |
| chr13 | 32903530  | 32903569  | BRCA2_400  | - | GTGACCTATGCACCAGACGTAAAATTTATGTGATTGTATATATCACTAGAATGCAAAAAGATCGGAAGAGCGGTTTCAG          |
| chr13 | 32905006  | 32905045  | BRCA2_401  | - | GTGACCTATGCACCAGACGTTATAGTTTAAATCACTAGTATAAAAACCTCAATGCACAAGATCGGAAGAGCGGTTTCAG          |
| chr13 | 32906359  | 32906398  | BRCA2_402  | - | GTGACCTATGCACCAGACGTATAAAACAGAAGCACATTAATTTTTATAAGCCATATAATAGATCGGAAGAGCGGTTTCAG         |
| chr13 | 32910352  | 32910391  | BRCA2_403  | - | GTGACCTATGCACCAGACGTAAACCAAAGTGACAAAATTAAGTACCATCAATCACATTAGATCGGAAGAGCGGTTTCAG          |
| chr13 | 32918645  | 32918684  | BRCA2_404  | - | GTGACCTATGCACCAGACGTATATTCATATATGTTTTAAGGCAATAATACAGTTTTAGATCGGAAGAGCGGTTTCAG            |
| chr13 | 32920914  | 32920953  | BRCA2_405  | - | GTGACCTATGCACCAGACGTATATTTATATTACATATTAGTTAAAATCAAGAGAATAAGATCGGAAGAGCGGTTTCAG           |
| chr13 | 32928948  | 32928987  | BRCA2_406  | - | GTGACCTATGCACCAGACGTGAGAAAAATATAAGTTTATTGACTAGTACACATATAAATAGATCGGAAGAGCGGTTTCAG         |

|       |           |           |           |   |                                                                                      |
|-------|-----------|-----------|-----------|---|--------------------------------------------------------------------------------------|
| chr13 | 32930515  | 32930554  | BRCA2_407 | - | GTGACCTATGCACCAGACGTATAAATACTTAGCAAAAATAAAATTGAAATTTAAAAAGCAAGATCGGAAGAGCGGTTTCAG    |
| chr13 | 32931829  | 32931868  | BRCA2_408 | - | GTGACCTATGCACCAGACGTTAAACACACACAAAAAGAAAAACAATTTAAAGTAAACATAGATCGGAAGAGCGGTTTCAG     |
| chr13 | 32936610  | 32936649  | BRCA2_409 | - | GTGACCTATGCACCAGACGTAAAAAGTAGAATATTATCATAAAAAACCACATAGGATGATACAGATCGGAAGAGCGGTTTCAG  |
| chr13 | 32937266  | 32937305  | BRCA2_410 | - | GTGACCTATGCACCAGACGTAAACAAAAATGCATATTTTAGGAAGTGTGACTCTAGAATTAGATCGGAAGAGCGGTTTCAG    |
| chr13 | 32944489  | 32944528  | BRCA2_411 | - | GTGACCTATGCACCAGACGTTAATAAATATATTGATTTAGTAGTTAAATATGTATTCAATAGATCGGAAGAGCGGTTTCAG    |
| chr13 | 32945043  | 32945082  | BRCA2_412 | - | GTGACCTATGCACCAGACGTGTGTACACACACAAAAAAGTCACATATAACATTTCAAAGATCGGAAGAGCGGTTTCAG       |
| chr13 | 32950757  | 32950796  | BRCA2_413 | - | GTGACCTATGCACCAGACGTAAAAAGTATTATAATTCACATAAACTGAAATTTCAAAGCAAGATCGGAAGAGCGGTTTCAG    |
| chr13 | 32953404  | 32953443  | BRCA2_414 | - | GTGACCTATGCACCAGACGTTTAAAGATTTGGAATAAAAAAGCAATCAGAACAAAAAGTTAGATCGGAAGAGCGGTTTCAG    |
| chr13 | 32953837  | 32953876  | BRCA2_415 | - | GTGACCTATGCACCAGACGTAAAGATGAGAAAGATGCAATGGAAGAAGTATTATCATTAGATCGGAAGAGCGGTTTCAG      |
| chr13 | 32954094  | 32954133  | BRCA2_416 | - | GTGACCTATGCACCAGACGTCAAAACAAAAATTTCAACATATGGAGATTCATAAACTAACAGATCGGAAGAGCGGTTTCAG    |
| chr13 | 32968776  | 32968815  | BRCA2_417 | - | GTGACCTATGCACCAGACGTAAAAAAAGAAAAAAGATGTTATTATAGATGTGTTAGATGAAAGATCGGAAGAGCGGTTTCAG   |
| chr13 | 32970985  | 32971024  | BRCA2_418 | - | GTGACCTATGCACCAGACGTAAAGTGGAAAAGTGCCTTTATAAATTCGAAACCCACATATTAGATCGGAAGAGCGGTTTCAG   |
| chr13 | 32972249  | 32972288  | BRCA2_419 | - | GTGACCTATGCACCAGACGTAAAGTGAACAGTATGCCTATCATAATTTAGTAGTAAACATAAAAGATCGGAAGAGCGGTTTCAG |
| chr13 | 32972553  | 32972592  | BRCA2_420 | - | GTGACCTATGCACCAGACGTTTTCTTTATGGGTGTTTCGTATTTGGTGCCACAACCTCCTTAGATCGGAAGAGCGGTTTCAG   |
| chr13 | 32906731  | 32906770  | BRCA2_421 | - | GTGACCTATGCACCAGACGTCTGGAGATTTTGTCACTTCCACTCTCAAAGGGCTTCTGAAGATCGGAAGAGCGGTTTCAG     |
| chr13 | 32907103  | 32907142  | BRCA2_422 | - | GTGACCTATGCACCAGACGTTCTTATTCTGAATATAGACTTTTTGATACCTGAAATGAAAGATCGGAAGAGCGGTTTCAG     |
| chr13 | 32910845  | 32910884  | BRCA2_423 | - | GTGACCTATGCACCAGACGTGCTGTGCTGACTGATTTTGTATGATTTTGCCTCTAGAATAGATCGGAAGAGCGGTTTCAG     |
| chr13 | 32911338  | 32911377  | BRCA2_424 | - | GTGACCTATGCACCAGACGTGCTGTGCTTACACTTTTGTCTTCTCGCAAGAACATAGATCGGAAGAGCGGTTTCAG         |
| chr13 | 32911831  | 32911870  | BRCA2_425 | - | GTGACCTATGCACCAGACGTTTCAAACACTGACTTCTGATTCTTCTAATATAGTAGAAAGTATAGATCGGAAGAGCGGTTTCAG |
| chr13 | 32912324  | 32912363  | BRCA2_426 | - | GTGACCTATGCACCAGACGTGGCATTATTATTTTTTCACTTACAGTTTTATCATTATGAGATCGGAAGAGCGGTTTCAG      |
| chr13 | 32912817  | 32912856  | BRCA2_427 | - | GTGACCTATGCACCAGACGTTCTGGTTTCTGATCAAAGAAATTTACAATTTTATTAAATGAGATCGGAAGAGCGGTTTCAG    |
| chr13 | 32913310  | 32913349  | BRCA2_428 | - | GTGACCTATGCACCAGACGTATTATCACTTAAGAGCTTAGGTGGCACCACAGTCTCAATAAGATCGGAAGAGCGGTTTCAG    |
| chr13 | 32913803  | 32913842  | BRCA2_429 | - | GTGACCTATGCACCAGACGTTTTTTGATCTTCAACTTCTCAATCTGGCTCAATACCAGATCGGAAGAGCGGTTTCAG        |
| chr13 | 32914296  | 32914335  | BRCA2_430 | - | GTGACCTATGCACCAGACGTCAAGGTGATTTTTGAAAACCTTTCTCAATCCAGACATATAGATCGGAAGAGCGGTTTCAG     |
| chr13 | 32914789  | 32914828  | BRCA2_431 | - | GTGACCTATGCACCAGACGTTCTCTTATCAACACGAGGAAGTATTTTTGATACATTTTGTAGATCGGAAGAGCGGTTTCAG    |
| chr17 | 37856442  | 37856481  | ERBB2_432 | - | GTGACCTATGCACCAGACGTGCGGCTCCGGCCCATGGCTCCGGCTGGACCCGGCTGGGAAGATCGGAAGAGCGGTTTCAG     |
| chr17 | 37863193  | 37863232  | ERBB2_433 | - | GTGACCTATGCACCAGACGTAGACAGATGGGTACAGAGGACTGGCGGGGGACCTTCTCAGATCGGAAGAGCGGTTTCAG      |
| chr17 | 37863210  | 37863249  | ERBB2_434 | - | GTGACCTATGCACCAGACGTGTGCACACTGGCAGGAGAGCAGCATGGGTGAGAGGACACAGATCGGAAGAGCGGTTTCAG     |
| chr17 | 37864524  | 37864563  | ERBB2_435 | - | GTGACCTATGCACCAGACGTGAAGCAGAGTGGGGCTGAAATGAGAACACTGCCACCCAGATCGGAAGAGCGGTTTCAG       |
| chr17 | 37865521  | 37865560  | ERBB2_436 | - | GTGACCTATGCACCAGACGTAGCAATGATCAGAGGACCCCTTCCCTTCTGTCACCTTCTAGATCGGAAGAGCGGTTTCAG     |
| chr17 | 37866016  | 37866055  | ERBB2_437 | - | GTGACCTATGCACCAGACGTAACCAGAGACAGGCAGTGAGAGAGATGTCTAACAGCGAGAAGATCGGAAGAGCGGTTTCAG    |
| chr17 | 37866289  | 37866328  | ERBB2_438 | - | GTGACCTATGCACCAGACGTAAGGGCAGGATGAGGGCTGAGTGGCGCCCTGGGCACCAGAAGATCGGAAGAGCGGTTTCAG    |
| chr17 | 37866543  | 37866582  | ERBB2_439 | - | GTGACCTATGCACCAGACGTAGGTGGCTGGCTTCACTGTGCTGTTTTGCCCTGGTGTGCAGATCGGAAGAGCGGTTTCAG     |
| chr17 | 37868131  | 37868170  | ERBB2_440 | - | GTGACCTATGCACCAGACGTGAGGAACATGTAGCCACATACCCCTGCCCTTCTGCAACAGATCGGAAGAGCGGTTTCAG      |
| chr17 | 37868525  | 37868564  | ERBB2_441 | - | GTGACCTATGCACCAGACGTGGGGGTGGGTGGGCAAGGGCCGCTGCTCAGCCTTCAACAGATCGGAAGAGCGGTTTCAG      |
| chr17 | 37871489  | 37871528  | ERBB2_442 | - | GTGACCTATGCACCAGACGTACAGGAGAGGATCAGCAGGGCCAGGAACAGGGTGGACATCAGATCGGAAGAGCGGTTTCAG    |
| chr17 | 37871649  | 37871688  | ERBB2_443 | - | GTGACCTATGCACCAGACGTAGGGTGAGATTAAGGAGTGGGGACAGGACAAGGACTCCAGATCGGAAGAGCGGTTTCAG      |
| chr17 | 37871943  | 37871982  | ERBB2_444 | - | GTGACCTATGCACCAGACGTAAGTGGGGACCTTACCACGGACCCCTTCCCGGTACAGCAAAGATCGGAAGAGCGGTTTCAG    |
| chr17 | 37872504  | 37872543  | ERBB2_445 | - | GTGACCTATGCACCAGACGTGAGGAAGGGACCCGAGGGGACTTTTAGGGGAGGGCCAGGAGATCGGAAGAGCGGTTTCAG     |
| chr17 | 37872718  | 37872757  | ERBB2_446 | - | GTGACCTATGCACCAGACGTGGACAGTGGTGAAGGGCTGAGAGGAGCCCATGCACCCAGATCGGAAGAGCGGTTTCAG       |
| chr17 | 37873523  | 37873562  | ERBB2_447 | - | GTGACCTATGCACCAGACGTGAAAAGATTTGTGGGGGCTGGCCTGACACCCCAAGATCGGAAGAGCGGTTTCAG           |
| chr17 | 37875990  | 37876029  | ERBB2_448 | - | GTGACCTATGCACCAGACGTAACAGTCTCATCAACAATCTGGGAACCCCTTGGGAAGATCGGAAGAGCGGTTTCAG         |
| chr17 | 37879522  | 37879561  | ERBB2_449 | - | GTGACCTATGCACCAGACGTAAGCCAGGGTCAGGGATTGAGGGCTAGTTTGGGGTGGGAGAGATCGGAAGAGCGGTTTCAG    |
| chr17 | 37879741  | 37879780  | ERBB2_450 | - | GTGACCTATGCACCAGACGTGGGGTGGTGGGTGAGTGCAGGGGGCCGGTGCAGACCCCAAGATCGGAAGAGCGGTTTCAG     |
| chr17 | 37880115  | 37880154  | ERBB2_451 | - | GTGACCTATGCACCAGACGTAGAGGAGGATAGTGAAGAGCGTGGGCTGGATCTTAAGATCGGAAGAGCGGTTTCAG         |
| chr17 | 37880929  | 37880968  | ERBB2_452 | - | GTGACCTATGCACCAGACGTGGGTACGCTGAGAGGGTATGGGAGACCACACACCCCAAGATCGGAAGAGCGGTTTCAG       |
| chr17 | 37881252  | 37881291  | ERBB2_453 | - | GTGACCTATGCACCAGACGTAAGCACCCATGTAGACCTTCTGGGAGGGCCCTGGGCCTGGCAGATCGGAAGAGCGGTTTCAG   |
| chr17 | 37881530  | 37881569  | ERBB2_454 | - | GTGACCTATGCACCAGACGTAGAAGAGGAAGTCCCTCAACTGTGTGTTGTTGGGAGGTTGGAGATCGGAAGAGCGGTTTCAG   |
| chr17 | 37881910  | 37881949  | ERBB2_455 | - | GTGACCTATGCACCAGACGTGACAGGGTCAGGAGTGGGAGGGCCAGAGGGAGCTTTAGTGAATCGGAAGAGCGGTTTCAG     |
| chr17 | 37882765  | 37882804  | ERBB2_456 | - | GTGACCTATGCACCAGACGTAGGGAGGTCAGCATGCTAGTCCCAGGCCCTGTGTGCTTGCAGATCGGAAGAGCGGTTTCAG    |
| chr17 | 37883018  | 37883057  | ERBB2_457 | - | GTGACCTATGCACCAGACGTAGGAGGACGATGGTGGCCCTCCCAAGCCAGATCGAGATCGGAAGAGCGGTTTCAG          |
| chr17 | 37883498  | 37883537  | ERBB2_458 | - | GTGACCTATGCACCAGACGTGAAAAGAAAGTTCATGATGGGGTCACTACCGATCTGGGATAGATCGGAAGAGCGGTTTCAG    |
| chr17 | 37883892  | 37883931  | ERBB2_459 | - | GTGACCTATGCACCAGACGTAAGAGAAGGTGACCCATTAGGGGAAGGAACCCCGGTGTCTAGATCGGAAGAGCGGTTTCAG    |
| chr7  | 140434347 | 140434386 | BRAF_460  | - | GTGACCTATGCACCAGACGTTGAGAGAGTTCAGGAGAGTAGCAACAAAAGAAAATAAATAGATCGGAAGAGCGGTTTCAG     |
| chr7  | 140439562 | 140439601 | BRAF_461  | - | GTGACCTATGCACCAGACGTGCTTCATGCTATCCAAAGAACAGACTAACATTATAGACAGATCGGAAGAGCGGTTTCAG      |
| chr7  | 140449037 | 140449076 | BRAF_462  | - | GTGACCTATGCACCAGACGTACCACGCTTTGGTGTATTATTTACCCTCTATATACAAGGCAGATCGGAAGAGCGGTTTCAG    |
| chr7  | 140453025 | 140453064 | BRAF_463  | - | GTGACCTATGCACCAGACGTAGGCTATTTTCCACTGATTTAAATTTTGGCCCTGAGATGAGATCGGAAGAGCGGTTTCAG     |
| chr7  | 140453937 | 140453976 | BRAF_464  | - | GTGACCTATGCACCAGACGTTGAAATTTGTCTGCGAAGTTGAAAACATCCTGACTTTTTAGATCGGAAGAGCGGTTTCAG     |



|       |           |           |           |   |                                                                                      |
|-------|-----------|-----------|-----------|---|--------------------------------------------------------------------------------------|
| chr7  | 140476662 | 140476701 | BRAF_465  | - | GTGACCTATGCACCAGACGTTTCGTAAATGTCTTGTAATATTTTTGAAGACCATTGAAGATCGGAAGAGCGGTTTCAG       |
| chr7  | 140477741 | 140477780 | BRAF_466  | - | GTGACCTATGCACCAGACGTTGTAATCTCTTTCCAGAGAAAGAGTTATTTTTATTAAGATCGGAAGAGCGGTTTCAG        |
| chr7  | 140481326 | 140481365 | BRAF_467  | - | GTGACCTATGCACCAGACGTAATGTGGTGACATTGTGACAAGTCATAATAGGATATGTTTAGATCGGAAGAGCGGTTTCAG    |
| chr7  | 140482771 | 140482810 | BRAF_468  | - | GTGACCTATGCACCAGACGTATGATATCTTTTTCTCTGAATCTTTCTTCTTAGAAGTAGATCGGAAGAGCGGTTTCAG       |
| chr7  | 140487298 | 140487337 | BRAF_469  | - | GTGACCTATGCACCAGACGTATTTTCAGGTTTTTTAAAAAAGCAAGGAAACTGCAATTTGCAGATCGGAAGAGCGGTTTCAG   |
| chr7  | 140494058 | 140494097 | BRAF_470  | - | GTGACCTATGCACCAGACGTAGCATTGCTAGAAGTAAAAAACCACAGTATGTATCTTTAGATCGGAAGAGCGGTTTCAG      |
| chr7  | 140500112 | 140500151 | BRAF_471  | - | GTGACCTATGCACCAGACGTTCTGCTCTTTGGCGACATGCTACTTTGAACCGCTTTCTAGATCGGAAGAGCGGTTTCAG      |
| chr7  | 140501162 | 140501201 | BRAF_472  | - | GTGACCTATGCACCAGACGTCAAAAATATCTCTTTTCTACCTACCATTTTACACTTAATAGATCGGAAGAGCGGTTTCAG     |
| chr7  | 140507710 | 140507749 | BRAF_473  | - | GTGACCTATGCACCAGACGTTTACATTTTTTTTTGAAATGTCAAAAATGTTTAGATTTAAGATCGGAAGAGCGGTTTCAG     |
| chr7  | 140508642 | 140508681 | BRAF_474  | - | GTGACCTATGCACCAGACGTTATGTGACGTGAAATTTTGTAAAAAGAAAATCACACATAGATCGGAAGAGCGGTTTCAG      |
| chr7  | 140534359 | 140534398 | BRAF_475  | - | GTGACCTATGCACCAGACGTTTAATATCACCATTTTGTCTTTTCTTTGTATTTTTCAGAAGATCGGAAGAGCGGTTTCAG     |
| chr7  | 140549861 | 140549900 | BRAF_476  | - | GTGACCTATGCACCAGACGTGAGTATCATCTAGTAAATTTTAAAAAGAAAAAATGAAAGATCGGAAGAGCGGTTTCAG       |
| chr7  | 140624316 | 140624355 | BRAF_477  | - | GTGACCTATGCACCAGACGTGCGCCACCCTGCGCCTCCCGACTCCGGCTCGCGGCTAGATCGGAAGAGCGGTTTCAG        |
| chr4  | 153243983 | 153244022 | FBXW7_478 | - | GTGACCTATGCACCAGACGTAGATGAATTTGTCCAATTGTGTAGACGATATACTCCCTGCAGATCGGAAGAGCGGTTTCAG    |
| chr4  | 153245286 | 153245325 | FBXW7_479 | - | GTGACCTATGCACCAGACGTCTCACCTTTTCGTTTTGTTTCATTAATAAGATGAGATCATTATAGATCGGAAGAGCGGTTTCAG |
| chr4  | 153247108 | 153247147 | FBXW7_480 | - | GTGACCTATGCACCAGACGTTTATCTCTCCCTTAATGCTCTCCTGATGAATCATAAGGTAGATCGGAAGAGCGGTTTCAG     |
| chr4  | 153249310 | 153249349 | FBXW7_481 | - | GTGACCTATGCACCAGACGTATCTCTCATGGTGGGACTTCTTCTCTTATTATTGGTGAAGATCGGAAGAGCGGTTTCAG      |
| chr4  | 153250774 | 153250813 | FBXW7_482 | - | GTGACCTATGCACCAGACGTTCTTCTCATCTTCAAAAGTCAATAATTTGTGATATCAAGATCGGAAGAGCGGTTTCAG       |
| chr4  | 153251834 | 153251873 | FBXW7_483 | - | GTGACCTATGCACCAGACGTTCTGCACAATGTAACAGAAACCCTTAATCAGTGTTAGTACAGATCGGAAGAGCGGTTTCAG    |
| chr4  | 153253698 | 153253737 | FBXW7_484 | - | GTGACCTATGCACCAGACGTAATTCATAGAGAATATGTTTATCTTTGAAAAGCAGAGAGATCGGAAGAGCGGTTTCAG       |
| chr4  | 153258904 | 153258943 | FBXW7_485 | - | GTGACCTATGCACCAGACGTTCAATTACATCTTTCATTGGGTGTTATTGAAATATATAACAGATCGGAAGAGCGGTTTCAG    |
| chr4  | 153268032 | 153268071 | FBXW7_486 | - | GTGACCTATGCACCAGACGTTAAACATAGTACTTGAATGCCTCACTTAATTGCTGCAAAAAGATCGGAAGAGCGGTTTCAG    |
| chr4  | 153271144 | 153271183 | FBXW7_487 | - | GTGACCTATGCACCAGACGTATAATGATTATCTCATGATCTCAGTTTTTTAGAGTTGAGATCGGAAGAGCGGTTTCAG       |
| chr4  | 153273572 | 153273611 | FBXW7_488 | - | GTGACCTATGCACCAGACGTTGTTTTCTTCTATGCTATGTGATTGTGTGTGATGCTGAGATCGGAAGAGCGGTTTCAG       |
| chr4  | 153303291 | 153303330 | FBXW7_489 | - | GTGACCTATGCACCAGACGTACATTTGAAAATATGAATGTTTATTAAAGTGAAGTACCAGATCGGAAGAGCGGTTTCAG      |
| chr4  | 153332405 | 153332444 | FBXW7_490 | - | GTGACCTATGCACCAGACGTTCAATATATTGTTAACCTGAGAAACTTTACATATCTATTAGATCGGAAGAGCGGTTTCAG     |
| chr3  | 37034989  | 37035028  | MLH1_491  | - | GTGACCTATGCACCAGACGTGAAGAGCCAAGGAAACGCTTAGATGCTCAACGGAAGTGCCAGATCGGAAGAGCGGTTTCAG    |
| chr3  | 37038060  | 37038099  | MLH1_492  | - | GTGACCTATGCACCAGACGTAACAGAAAATAATTTATCAGTCTGCAACTACTCTAATGTAGATCGGAAGAGCGGTTTCAG     |
| chr3  | 37042396  | 37042435  | MLH1_493  | - | GTGACCTATGCACCAGACGTCCAAAAGATGAGTAAATAATCATGTTACTATTTTTCCAAGATCGGAAGAGCGGTTTCAG      |
| chr3  | 37045842  | 37045881  | MLH1_494  | - | GTGACCTATGCACCAGACGTAAAGAAAATAGACTAAAGAAAAAAGTACTGCTGGGTACAGATCGGAAGAGCGGTTTCAG      |
| chr3  | 37048432  | 37048471  | MLH1_495  | - | GTGACCTATGCACCAGACGTAATAACAAATTAATATCCAGTAGAGAGATAGATACTAAAGATCGGAAGAGCGGTTTCAG      |
| chr3  | 37050255  | 37050294  | MLH1_496  | - | GTGACCTATGCACCAGACGTGATTGATTTTTCTTGTAATTCATAGAAGTACTTGAATAAGATCGGAAGAGCGGTTTCAG      |
| chr3  | 37053261  | 37053300  | MLH1_497  | - | GTGACCTATGCACCAGACGTAAAAAAGAGTAAGAAAAGATTTGCCAAAAACACACAGATCGGAAGAGCGGTTTCAG         |
| chr3  | 37053491  | 37053491  | MLH1_498  | - | GTGACCTATGCACCAGACGTAACAGCAGAGACACAAGGATTTATTGTTCTCATGGCTGAGAGATCGGAAGAGCGGTTTCAG    |
| chr3  | 37055873  | 37055912  | MLH1_499  | - | GTGACCTATGCACCAGACGTGAGGATTTGAAAGCTTTTTGAAAATACTCAAAACTCAAAACAGATCGGAAGAGCGGTTTCAG   |
| chr3  | 37058947  | 37058986  | MLH1_500  | - | GTGACCTATGCACCAGACGTA AAAAGCAACCAAGTTCAAAACTGTCTGAGGGTGAGAGATCGGAAGAGCGGTTTCAG       |
| chr3  | 37061751  | 37061790  | MLH1_501  | - | GTGACCTATGCACCAGACGTAATAAGAGAGAACAATTACCTTAGATAGTGGGAGGGGAGAGATCGGAAGAGCGGTTTCAG     |
| chr3  | 37070225  | 37070264  | MLH1_502  | - | GTGACCTATGCACCAGACGTGAAAAGGAAGTGCAGATCATTATTATCTTGTTTTTAAACAGATCGGAAGAGCGGTTTCAG     |
| chr3  | 37081627  | 37081666  | MLH1_503  | - | GTGACCTATGCACCAGACGTA AAAAATAAAACCAAAAACAGGTAAGTAATAGAATCCTACAGATCGGAAGAGCGGTTTCAG   |
| chr3  | 37083709  | 37083748  | MLH1_504  | - | GTGACCTATGCACCAGACGTA AATGAAGTGACTTTAAGGAAAAGTGAATTCATGCTTGAAGATCGGAAGAGCGGTTTCAG    |
| chr3  | 37088960  | 37088999  | MLH1_505  | - | GTGACCTATGCACCAGACGTGAAAGAAACATGAAAGCAAGCTTTAACGGAGCATCCAAAAGATCGGAAGAGCGGTTTCAG     |
| chr3  | 37089958  | 37089997  | MLH1_506  | - | GTGACCTATGCACCAGACGTGAAAAGGACAAGGGAACAAGAAATAATGCTGTCATAGTTAGATCGGAAGAGCGGTTTCAG     |
| chr3  | 37090345  | 37090384  | MLH1_507  | - | GTGACCTATGCACCAGACGTGAAATTC AATACCTCAAAATAGGTACGAATTTAAACATTCAGATCGGAAGAGCGGTTTCAG   |
| chr3  | 37091927  | 37091966  | MLH1_508  | - | GTGACCTATGCACCAGACGT CATTAGATGTCATAAGCCTCCCTGTTTGCATCCCAACATAAGATCGGAAGAGCGGTTTCAG   |
| chr2  | 47630281  | 47630320  | MSH2_509  | - | GTGACCTATGCACCAGACGTTCTCCTCGTTGTAAGAAAATGCGCGACCCACCCAGATCGGAAGAGCGGTTTCAG           |
| chr2  | 47635529  | 47635529  | MSH2_510  | - | GTGACCTATGCACCAGACGTAAAAAAGTACATTACAGATTTGAGATTTACATGTTCAAGAGATCGGAAGAGCGGTTTCAG     |
| chr2  | 47639503  | 47639542  | MSH2_511  | - | GTGACCTATGCACCAGACGTAGAAATAGTTTAAACTACTATGAGAAAAGGAATAAGAAAAGATCGGAAGAGCGGTTTCAG     |
| chr2  | 47641358  | 47641397  | MSH2_512  | - | GTGACCTATGCACCAGACGTGAATTTAAAAATCGAAGATTTCTATACCACTGGATCCAGTAGATCGGAAGAGCGGTTTCAG    |
| chr2  | 47643385  | 47643424  | MSH2_513  | - | GTGACCTATGCACCAGACGTAAAAATAAAATAGAAAAGATGGCAAGCTCATTAGTGA AAAAGATCGGAAGAGCGGTTTCAG   |
| chr2  | 47672637  | 47672676  | MSH2_514  | - | GTGACCTATGCACCAGACGTG TAGTAAAAAACAATAAAAAGATCTCATTTTACAGAAAAGATCGGAAGAGCGGTTTCAG     |
| chr2  | 47690120  | 47690159  | MSH2_515  | - | GTGACCTATGCACCAGACGTAACAAAGTGACAAAATCCTATAAATGGGTAAAGACAGAGATCGGAAGAGCGGTTTCAG       |
| chr2  | 47693747  | 47693786  | MSH2_516  | - | GTGACCTATGCACCAGACGTGAAAGAAAAGATTTCCATAAATACCTACTACCAAGATCGGAAGAGCGGTTTCAG           |
| chr2  | 47702114  | 47702153  | MSH2_517  | - | GTGACCTATGCACCAGACGTATAAAAAACAGAAAATGTACACAGGAATACTGAATAATAAAAAGATCGGAAGAGCGGTTTCAG  |
| chr2  | 47703456  | 47703495  | MSH2_518  | - | GTGACCTATGCACCAGACGTAATTATATCAGAAAAGCAAGATTTTAAACTTCTTTCTGCTAAGATCGGAAGAGCGGTTTCAG   |
| chr2  | 47705361  | 47705400  | MSH2_519  | - | GTGACCTATGCACCAGACGTTAATTACATGAAATTTCCCATCACATAAAATGTGGTAACAAAGATCGGAAGAGCGGTTTCAG   |
| chr2  | 47707785  | 47707824  | MSH2_520  | - | GTGACCTATGCACCAGACGTTTTGGGGAAGCGTGAGGGGACAGCATGAGAAGAGACAGCAAGATCGGAAGAGCGGTTTCAG    |
| chr2  | 47709868  | 47709907  | MSH2_521  | - | GTGACCTATGCACCAGACGTTTGAATGTTCCCATGATTAATAACTTTTTCTAAAAAGATCGGAAGAGCGGTTTCAG         |
| chr18 | 48573367  | 48573406  | SMAD4_522 | - | GTGACCTATGCACCAGACGTTTTCCTTTTAAATCAAATGTCTCCAATTTCTGAAGCAAGATCGGAAGAGCGGTTTCAG       |

|       |           |           |            |   |                                                                                             |
|-------|-----------|-----------|------------|---|---------------------------------------------------------------------------------------------|
| chr18 | 48575615  | 48575654  | SMAD4_523  | - | GTGACCTATGCACCAGACGTTAAAGGGGAAAACAATGAAACATTAATCATTACAATGAAAGATCGGAAGAGCGGTTTCAG            |
| chr18 | 48584445  | 48584484  | SMAD4_524  | - | GTGACCTATGCACCAGACGTAAGAAGACATTAACATGGTACATTCATAGATGCATCTTAAGATCGGAAGAGCGGTTTCAG            |
| chr18 | 48584660  | 48584699  | SMAD4_525  | - | GTGACCTATGCACCAGACGTAGGCCACATGGGTTAATTTGCTTTTATAAAGGCTGCCTAAGATCGGAAGAGCGGTTTCAG            |
| chr18 | 48586186  | 48586225  | SMAD4_526  | - | GTGACCTATGCACCAGACGTGACAACAAAATTCATTTTTATTACTAAAAGTTGTCTAAGATCGGAAGAGCGGTTTCAG              |
| chr18 | 48591743  | 48591782  | SMAD4_527  | - | GTGACCTATGCACCAGACGTTAAATGGGAAAGAACATCCTCCATGAGAAAGATATAAGGAGATCGGAAGAGCGGTTTCAG            |
| chr18 | 48593339  | 48593378  | SMAD4_528  | - | GTGACCTATGCACCAGACGTA AAAAGAAAATTCATTTTTATCTTGATAAGTATTTAAATAGATCGGAAGAGCGGTTTCAG           |
| chr18 | 48602958  | 48602997  | SMAD4_529  | - | GTGACCTATGCACCAGACGTA AAAACATTTACACTATGAGTTCATAAAGAAAAATTCATAGATCGGAAGAGCGGTTTCAG           |
| chr18 | 48604576  | 48604615  | SMAD4_530  | - | GTGACCTATGCACCAGACGTAGATTTGGAAGACATCAGAGGGACAGGGTATCTCTCCAGATCGGAAGAGCGGTTTCAG              |
| chr9  | 22005936  | 22005975  | CDKN2B_531 | - | GTGACCTATGCACCAGACGTCCCAGCCGCCACAACGACTTTATTTTCTTACCCAATTCAGATCGGAAGAGCGGTTTCAG             |
| chr9  | 22008666  | 22008705  | CDKN2B_532 | - | GTGACCTATGCACCAGACGTTAGATTTGTACAGGAGTCTCCGTTGGCCGGAGGTGTGCATAGATCGGAAGAGCGGTTTCAG           |
| chr9  | 22008747  | 22008786  | CDKN2B_533 | - | GTGACCTATGCACCAGACGTCCCCAGGCCCTCGCCGGCAGGGGGCCGCGCAACGCGGGGCGAGATCGGAAGAGCGGTTTCAG          |
| chr4  | 1800931   | 1800970   | FGFR3_534  | - | GTGACCTATGCACCAGACGTGATGGCAACCATGAGGCAGGCACCCCAACCCCGGCACAGATCGGAAGAGCGGTTTCAG              |
| chr4  | 1801424   | 1801463   | FGFR3_535  | - | GTGACCTATGCACCAGACGTGAGATGGCCGCAACCAATGCCCAACCTGCCCCAGGAGGCAGATCGGAAGAGCGGTTTCAG            |
| chr4  | 1803044   | 1803083   | FGFR3_536  | - | GTGACCTATGCACCAGACGTAGGTGCGTGTGAAGGCCATGACCCGAGTGGGAGCAGAGGCAGATCGGAAGAGCGGTTTCAG           |
| chr4  | 1803297   | 1803336   | FGFR3_537  | - | GTGACCTATGCACCAGACGTACCGGGGGCGGTGAGTGAGCGGAGGCAGCAACCACCCGCGCAGATCGGAAGAGCGGTTTCAG          |
| chr4  | 1805369   | 1805408   | FGFR3_538  | - | GTGACCTATGCACCAGACGTAGACGAGAGCGATAGGCGAGCCAGCACCGCCCTCGCGGAGATCGGAAGAGCGGTTTCAG             |
| chr4  | 1806007   | 1806046   | FGFR3_539  | - | GTGACCTATGCACCAGACGTATGGGCGTTGAGGCTGGCCTGGCCGCCCCCCACCGGGGAGATCGGAAGAGCGGTTTCAG             |
| chr4  | 1806501   | 1806540   | FGFR3_540  | - | GTGACCTATGCACCAGACGTGACGAGGGCCAGGTTGGCGCCGCGTGGCGCAGAGGGCGTGAGATCGGAAGAGCGGTTTCAG           |
| chr4  | 1807032   | 1807071   | FGFR3_541  | - | GTGACCTATGCACCAGACGTAGGCAGAGGGACCATGAGTGTGCAAACCTCGCCACTCTCAAGATCGGAAGAGCGGTTTCAG           |
| chr4  | 1807236   | 1807275   | FGFR3_542  | - | GTGACCTATGCACCAGACGTAGCGGGGGGCTGTGTGACGGCGGCGGGCGGCCCCAGCCAGATCGGAAGAGCGGTTTCAG             |
| chr4  | 1807427   | 1807466   | FGFR3_543  | - | GTGACCTATGCACCAGACGTGGGCTCCTCAGACGGGCTGCCAGGCCAGGAGGGCCGCCAGATCGGAAGAGCGGTTTCAG             |
| chr4  | 1807728   | 1807767   | FGFR3_544  | - | GTGACCTATGCACCAGACGTGGTGGGAGGCAGGGCTGAAGCCTCTCCACCTCTCCCGCTAGATCGGAAGAGCGGTTTCAG            |
| chr4  | 1807934   | 1807973   | FGFR3_545  | - | GTGACCTATGCACCAGACGTGTTGGGAGGCGGCTGTTGGCGCCAGGCGTCTACTGGCATGAGATCGGAAGAGCGGTTTCAG           |
| chr4  | 1808223   | 1808262   | FGFR3_546  | - | GTGACCTATGCACCAGACGTAGGTGAGGTGAGGCTGTCTGAGACTCCAGGACAGACAGATCGGAAGAGCGGTTTCAG               |
| chr4  | 1808506   | 1808545   | FGFR3_547  | - | GTGACCTATGCACCAGACGTGGCGCTCAGGAGTGAGCCCGCCGCTTCCCGCTTATTTCGAGATCGGAAGAGCGGTTTCAG            |
| chr4  | 1808793   | 1808832   | FGFR3_548  | - | GTGACCTATGCACCAGACGTGAGGCGGGGTGAGCGCTGTGCCACCGAGCCCTCTTCGCAAGATCGGAAGAGCGGTTTCAG            |
| chr2  | 48010323  | 48010362  | MSH6_549   | - | GTGACCTATGCACCAGACGTGGCAAGGCCAACCGTTCTGTGCGACGGAGCTCCTAAAAGAGATCGGAAGAGCGGTTTCAG            |
| chr2  | 48018016  | 48018055  | MSH6_550   | - | GTGACCTATGCACCAGACGTAAGGAAATACATAACTAGTTAATTTGGTCAAGTTTCCAGATCGGAAGAGCGGTTTCAG              |
| chr2  | 48025700  | 48025739  | MSH6_551   | - | GTGACCTATGCACCAGACGTAGGAAAGAGTATTTAAAAACAATCAAATTTGGAAAACAGATCGGAAGAGCGGTTTCAG              |
| chr2  | 48030509  | 48030548  | MSH6_552   | - | GTGACCTATGCACCAGACGTAGCGGGTACAGGCTGAGGCTTATGAGCCCTCATCGTTTTGGGGTTTTATCAGATCGGAAGAGCGGTTTCAG |
| chr2  | 48031999  | 48032038  | MSH6_553   | - | GTGACCTATGCACCAGACGTGGGAGGAAAAGGTCCTTTTATGACTGGTAGTAACAGTTTCAAGATCGGAAGAGCGGTTTCAG          |
| chr2  | 48032707  | 48032746  | MSH6_554   | - | GTGACCTATGCACCAGACGTAAAAAATCACAAATGAATACTCATTTTGCAAATCATATTAAGATCGGAAGAGCGGTTTCAG           |
| chr2  | 48033293  | 48033332  | MSH6_555   | - | GTGACCTATGCACCAGACGTAAAAATATGCATAAGGAAGTAACCAAAGGAATTA AAAACAAAGATCGGAAGAGCGGTTTCAG         |
| chr2  | 48033541  | 48033580  | MSH6_556   | - | GTGACCTATGCACCAGACGTAAAAATATTGAGTACATGTGCTAGCAAGAGAAGTGCCCAAGATCGGAAGAGCGGTTTCAG            |
| chr2  | 48026124  | 48026163  | MSH6_557   | - | GTGACCTATGCACCAGACGTTTTAGAATTTTGAGGGGCAAGAAAGCTCTCAAAGTATTCAGATCGGAAGAGCGGTTTCAG            |
| chr2  | 48026548  | 48026587  | MSH6_558   | - | GTGACCTATGCACCAGACGTGAGTCTCAGTCTGTTCCACTCGTCTACTTTTATAGCCCTTAGATCGGAAGAGCGGTTTCAG           |
| chr2  | 48026972  | 48027011  | MSH6_559   | - | GTGACCTATGCACCAGACGTGCATCCCAAACCTGGGAGCCGGGTATCAGACCTTCTGAAAGATCGGAAGAGCGGTTTCAG            |
| chr2  | 48027396  | 48027435  | MSH6_560   | - | GTGACCTATGCACCAGACGTCTTACAAAAGGAGTATGGCAAGTATCAACCCCTCTCTAGTAGATCGGAAGAGCGGTTTCAG           |
| chr2  | 48027820  | 48027859  | MSH6_561   | - | GTGACCTATGCACCAGACGTCCCTCGGTTCAATTCTACAGTCAAATCAGGAAAACGACCAGATCGGAAGAGCGGTTTCAG            |
| chr3  | 138374181 | 138374220 | PIK3CB_562 | - | GTGACCTATGCACCAGACGTTCCGCTCAATGATTTTGGTTCATTTTCATTTAGATCGGAAGAGCGGTTTCAG                    |
| chr3  | 138374934 | 138374973 | PIK3CB_563 | - | GTGACCTATGCACCAGACGTACTTTTTCTCTCTGGACTTTGGCCATTGAGCTCAAAGATCGGAAGAGCGGTTTCAG                |
| chr3  | 138376482 | 138376521 | PIK3CB_564 | - | GTGACCTATGCACCAGACGTCCCTTGTGCCAAGGCTGAACACTTCTAACATTTTCTTATCAGATCGGAAGAGCGGTTTCAG           |
| chr3  | 138382698 | 138382737 | PIK3CB_565 | - | GTGACCTATGCACCAGACGTCTCAGGATCTGCCAAGGGCCTAGTAATGCTATTTCTTAAAGATCGGAAGAGCGGTTTCAG            |
| chr3  | 138383828 | 138383867 | PIK3CB_566 | - | GTGACCTATGCACCAGACGTTCTGTTAATTTATCATTTTTCTGTACAACAGCCAAACAAGATCGGAAGAGCGGTTTCAG             |
| chr3  | 138400759 | 138400798 | PIK3CB_567 | - | GTGACCTATGCACCAGACGTGCTTTTTTTTTTTTTCAGTCTAATGCTTTCCATAGCAAAGATCGGAAGAGCGGTTTCAG             |
| chr3  | 138402470 | 138402509 | PIK3CB_568 | - | GTGACCTATGCACCAGACGTAGATTTTTAACATCAAATTTTACATTTTTCATTTTGTATAGATCGGAAGAGCGGTTTCAG            |
| chr3  | 138403417 | 138403456 | PIK3CB_569 | - | GTGACCTATGCACCAGACGTGTGCTTTGCGCAGTAATCTCCTATGAATAGCAAGCAGAAAGATCGGAAGAGCGGTTTCAG            |
| chr3  | 138407667 | 138407706 | PIK3CB_570 | - | GTGACCTATGCACCAGACGTGTTTTATTTATTCATTTTTCTTTTTTTGACAGACAACGTAGATCGGAAGAGCGGTTTCAG            |
| chr3  | 138409792 | 138409831 | PIK3CB_571 | - | GTGACCTATGCACCAGACGTTATATTTTACTTTGAGCCACCAGGTGCTTTAGTAACATAGATCGGAAGAGCGGTTTCAG             |
| chr3  | 138413578 | 138413617 | PIK3CB_572 | - | GTGACCTATGCACCAGACGTCAAGTGGTTTTCTTTGGGGCAAGGAATAACTTGGGTGGGTAGATCGGAAGAGCGGTTTCAG           |
| chr3  | 138417699 | 138417738 | PIK3CB_573 | - | GTGACCTATGCACCAGACGTATCGTTCTATAACTTTTTGGGTGATGGTACTTTGGTTAGATCGGAAGAGCGGTTTCAG              |
| chr3  | 138423235 | 138423274 | PIK3CB_574 | - | GTGACCTATGCACCAGACGTAGATTTTTAAATGGCCCTTTCTTATGAGTTGTGCACATTAGATCGGAAGAGCGGTTTCAG            |
| chr3  | 138425951 | 138425990 | PIK3CB_575 | - | GTGACCTATGCACCAGACGTTATTTAAAGGACCTCTATGCATGAAATGATTGAATGATCAAGATCGGAAGAGCGGTTTCAG           |
| chr3  | 138431000 | 138431039 | PIK3CB_576 | - | GTGACCTATGCACCAGACGTCAATCTTATCCTTAGTGTTAAAGCATAACTAACTTTGGCAGATCGGAAGAGCGGTTTCAG            |
| chr3  | 138433260 | 138433299 | PIK3CB_577 | - | GTGACCTATGCACCAGACGTACCAACTCTGAGGATGTTTTATATAACGGAATAATTTAGATCGGAAGAGCGGTTTCAG              |
| chr3  | 138452153 | 138452192 | PIK3CB_578 | - | GTGACCTATGCACCAGACGTAAAGATTTGAAATTTGCCATCCGCTCCAGTATTTGAATAAGATCGGAAGAGCGGTTTCAG            |
| chr3  | 138453426 | 138453465 | PIK3CB_579 | - | GTGACCTATGCACCAGACGTTTTCTGAACCTTTAGTAAACCCCAAAAGCATGTGATTTGTAGATCGGAAGAGCGGTTTCAG           |
| chr3  | 138477965 | 138478004 | PIK3CB_580 | - | GTGACCTATGCACCAGACGTAGGTATAATTTCTATGTGTTTAGCATACTGTGTCACTTGGAGATCGGAAGAGCGGTTTCAG           |

|      |           |           |            |   |                                                                                     |
|------|-----------|-----------|------------|---|-------------------------------------------------------------------------------------|
| chr5 | 67522454  | 67522493  | PIK3R1_581 | - | GTGACCTATGCACCAGACGCTGTGCTACCATGCAACAGTTGAGCCTGGTTGTACAGAGCAGAGATCGGAAGAGCGGTTTCAG  |
| chr5 | 67569168  | 67569207  | PIK3R1_582 | - | GTGACCTATGCACCAGACGCTCAAATCCCACCATTGTATTTAATTTGGATAGTTGAATGCAGATCGGAAGAGCGGTTTCAG   |
| chr5 | 67569717  | 67569756  | PIK3R1_583 | - | GTGACCTATGCACCAGACGTAACAGACCACAGACCATGTATGCAAAACACAGCTCTCTGAGATCGGAAGAGCGGTTTCAG    |
| chr5 | 67575380  | 67575419  | PIK3R1_584 | - | GTGACCTATGCACCAGACGTATTTAAGAAATATTTCCAGACATTTATTTATAGAATACATAGATCGGAAGAGCGGTTTCAG   |
| chr5 | 67576306  | 67576345  | PIK3R1_585 | - | GTGACCTATGCACCAGACGTAAAAAAGAAAGAAATGAGTAAGCGACTACTTCCAGATCGGAAGAGCGGTTTCAG          |
| chr5 | 67576705  | 67576744  | PIK3R1_586 | - | GTGACCTATGCACCAGACGTGAGAGTTTATTAGAAACCTTTTCCCTAAAAGCAAACATCATAGATCGGAAGAGCGGTTTCAG  |
| chr5 | 67584514  | 67584553  | PIK3R1_587 | - | GTGACCTATGCACCAGACGTCCCTTTGAAATGCCTGTATCCGCACAAATGAAAAAAGATCGGAAGAGCGGTTTCAG        |
| chr5 | 67586507  | 67586546  | PIK3R1_588 | - | GTGACCTATGCACCAGACGTGTTTCTTGGCTGAGCTCAGTTATAAGAAAAGAGTCCGGCAGATCGGAAGAGCGGTTTCAG    |
| chr5 | 67588037  | 67588076  | PIK3R1_589 | - | GTGACCTATGCACCAGACGTAAAAGAAAAAGTTGTTCCGCAATCCCACTACATTAGAAGTATAGATCGGAAGAGCGGTTTCAG |
| chr5 | 67588879  | 67588918  | PIK3R1_590 | - | GTGACCTATGCACCAGACGTAAACAAAAAATGCTCATCTTAAGGTTTGTAGTACCACAGAGATCGGAAGAGCGGTTTCAG    |
| chr5 | 67589081  | 67589120  | PIK3R1_591 | - | GTGACCTATGCACCAGACGTAATATAAAAAATAAGGTATTAACATTTTGAATAAGGAAAAGATCGGAAGAGCGGTTTCAG    |
| chr5 | 67589487  | 67589526  | PIK3R1_592 | - | GTGACCTATGCACCAGACGTTAAAATAAATTCATGGATAAGTATTTAATCAAATAACAAGATCGGAAGAGCGGTTTCAG     |
| chr5 | 67590314  | 67590353  | PIK3R1_593 | - | GTGACCTATGCACCAGACGTATTTTAAAAAGATAATGTCATCTTATGAACAATCTAGATCGGAAGAGCGGTTTCAG        |
| chr5 | 67590926  | 67590965  | PIK3R1_594 | - | GTGACCTATGCACCAGACGTAAGAAACGTATTTGTTATTATCTGGGTACATCAGGAACGGAGATCGGAAGAGCGGTTTCAG   |
| chr5 | 67591198  | 67591237  | PIK3R1_595 | - | GTGACCTATGCACCAGACGTGTTTGAAGAGAACGCATTAACCTCATCCTGAATTGTAGAGATCGGAAGAGCGGTTTCAG     |
| chr5 | 67591949  | 67591988  | PIK3R1_596 | - | GTGACCTATGCACCAGACGTAGGACAGAAAGTTTCTAAATGAAGAGTGCAGGAGCCATCAAGATCGGAAGAGCGGTTTCAG   |
| chr5 | 67593190  | 67593229  | PIK3R1_597 | - | GTGACCTATGCACCAGACGTGAGAAAGAAACCTGCTTTTGGCTTGTCCAAGCAATTCAGATCGGAAGAGCGGTTTCAG      |
| chr2 | 128015122 | 128015161 | ERCC3_598  | - | GTGACCTATGCACCAGACGTGGGTACTTCGTTCAAGCCGGCGCTTGGCACCTTGTGGAGATCGGAAGAGCGGTTTCAG      |
| chr2 | 128016822 | 128016861 | ERCC3_599  | - | GTGACCTATGCACCAGACGTGGGTGAGGAGTTCCAGGTGCTAGTCTCACAGGGCAGAGATCGGAAGAGCGGTTTCAG       |
| chr2 | 128018754 | 128018793 | ERCC3_600  | - | GTGACCTATGCACCAGACGTATTTGGCTTCTGGTTAGACTAGGACCAAGGCCTTCTTGATAGATCGGAAGAGCGGTTTCAG   |
| chr2 | 128028862 | 128028901 | ERCC3_601  | - | GTGACCTATGCACCAGACGTCTTTCATCTTCTGTTGCAGGAGTCACTCCTCTTAAACCAAGATCGGAAGAGCGGTTTCAG    |
| chr2 | 128030391 | 128030430 | ERCC3_602  | - | GTGACCTATGCACCAGACGTATATGGGTGGAGGTGAGGCCCTAGCACTCTGGGGACCAGATCGGAAGAGCGGTTTCAG      |
| chr2 | 128036699 | 128036738 | ERCC3_603  | - | GTGACCTATGCACCAGACGTAACCTGGAGCTTCTCCAGGCCAGTTTCTCTCCCATAGATCGGAAGAGCGGTTTCAG        |
| chr2 | 128037973 | 128038012 | ERCC3_604  | - | GTGACCTATGCACCAGACGTCTGGCTGGGGCGCTGCGGAAAGGGCCCTCTCCTTAGGAGATCGGAAGAGCGGTTTCAG      |
| chr2 | 128044229 | 128044268 | ERCC3_605  | - | GTGACCTATGCACCAGACGTTGGAGCTGAGCTGTCCACTTGTGAACAGACAAACCAATTAGATCGGAAGAGCGGTTTCAG    |
| chr2 | 128046186 | 128046225 | ERCC3_606  | - | GTGACCTATGCACCAGACGTCCAGAGTTAAGAAGGTGGTCAGGCTGTTGTGTCTGGATCTAGATCGGAAGAGCGGTTTCAG   |
| chr2 | 128046863 | 128046902 | ERCC3_607  | - | GTGACCTATGCACCAGACGTGTACCTTCTCCTGGTTCTTCACTGACTGCTGTTAGAAAGATCGGAAGAGCGGTTTCAG      |
| chr2 | 128047215 | 128047254 | ERCC3_608  | - | GTGACCTATGCACCAGACGTTCTTGGCCACCCTTGGGTGGGGCAGGCATTTAGGATTTAGATCGGAAGAGCGGTTTCAG     |
| chr2 | 128047750 | 128047789 | ERCC3_609  | - | GTGACCTATGCACCAGACGTCCATGACAGGCCTGCCCCAGGCCTGTCACTTTCTCGCAGATCGGAAGAGCGGTTTCAG      |
| chr2 | 128050136 | 128050175 | ERCC3_610  | - | GTGACCTATGCACCAGACGTGCTGAGACCAGCAATTCACCTGCCCTGCTAATGTAACAAAGATCGGAAGAGCGGTTTCAG    |
| chr2 | 128051039 | 128051078 | ERCC3_611  | - | GTGACCTATGCACCAGACGTCTTAGCTTGGGCAGGGCCAGGAGTGTGCGGAGCGGCAGAGATCGGAAGAGCGGTTTCAG     |
| chr2 | 128051580 | 128051619 | ERCC3_612  | - | GTGACCTATGCACCAGACGTGCGCGGCACGCTCAGCCACGACTGCCCTTGGCCGGCCTGAGATCGGAAGAGCGGTTTCAG    |
| chr9 | 5021938   | 5021977   | JAK2_613   | - | GTGACCTATGCACCAGACGTTTTCAGAAACATTTGCCCTGTAAGAGAAAACAATAAAGTTACAGATCGGAAGAGCGGTTTCAG |
| chr9 | 5029733   | 5029772   | JAK2_614   | - | GTGACCTATGCACCAGACGTGACAGAGAAAGGAATTTAAAGGTACACAACAGAATATTAGATCGGAAGAGCGGTTTCAG     |
| chr9 | 5044353   | 5044392   | JAK2_615   | - | GTGACCTATGCACCAGACGTATAAAACATTTGGTCAGCTTCCAATAGTTCAAATACAAAGATCGGAAGAGCGGTTTCAG     |
| chr9 | 5050636   | 5050675   | JAK2_616   | - | GTGACCTATGCACCAGACGTAATTTGAAGGAAATATCTCATCGTAAGTTTCATTATCATAGATCGGAAGAGCGGTTTCAG    |
| chr9 | 5054513   | 5054552   | JAK2_617   | - | GTGACCTATGCACCAGACGTAAGACACATACAGAAAACAAAACAAAACAAAATTTGAAAGATCGGAAGAGCGGTTTCAG     |
| chr9 | 5055619   | 5055658   | JAK2_618   | - | GTGACCTATGCACCAGACGTAAAGCATGTAATAAATAAAACCGGTGAGAATTTACAGAGCCAAGATCGGAAGAGCGGTTTCAG |
| chr9 | 5064833   | 5064872   | JAK2_619   | - | GTGACCTATGCACCAGACGTAAGAAAGAAAGAAATAGCACCTTTTAGAAAGTCAACTCCAAGATCGGAAGAGCGGTTTCAG   |
| chr9 | 5066628   | 5066667   | JAK2_620   | - | GTGACCTATGCACCAGACGTAGAAGAAGCAATTTGAATAATATCAAGACCATAATATAGATCGGAAGAGCGGTTTCAG      |
| chr9 | 5068972   | 5069011   | JAK2_621   | - | GTGACCTATGCACCAGACGTTAATATAAAAGAAAGGGAGGATGACATCACAATGGACATCAGATCGGAAGAGCGGTTTCAG   |
| chr9 | 5069875   | 5069914   | JAK2_622   | - | GTGACCTATGCACCAGACGTAATAATACATATATCACTTCAAATACACTGAAAGTATGAGATCGGAAGAGCGGTTTCAG     |
| chr9 | 5072442   | 5072481   | JAK2_623   | - | GTGACCTATGCACCAGACGTAAGAGTAAAGAAAAGAAATGAGTAAAGATGGAGAACGAAAGATCGGAAGAGCGGTTTCAG    |
| chr9 | 5073648   | 5073687   | JAK2_624   | - | GTGACCTATGCACCAGACGTAAAAAAGTACAAAGAATTTGTTGTTGACTGTTGTCATAAAGATCGGAAGAGCGGTTTCAG    |
| chr9 | 5078256   | 5078295   | JAK2_625   | - | GTGACCTATGCACCAGACGTTAAACGCACATATTTCAAATATCAGTCCACAAGTACTGGAGATCGGAAGAGCGGTTTCAG    |
| chr9 | 5080179   | 5080218   | JAK2_626   | - | GTGACCTATGCACCAGACGTATACGAACAGTAGTGGTTAAATATCCAAGTAAACCAAGATCGGAAGAGCGGTTTCAG       |
| chr9 | 5080483   | 5080522   | JAK2_627   | - | GTGACCTATGCACCAGACGTAGAACCACAACTGAGAATAAATTTGTAATGCCACACCAAGATCGGAAGAGCGGTTTCAG     |
| chr9 | 5081675   | 5081714   | JAK2_628   | - | GTGACCTATGCACCAGACGTAAGAATATTATCACCTTAAATTAGCAAATAACATTTCTAGATCGGAAGAGCGGTTTCAG     |
| chr9 | 5089624   | 5089663   | JAK2_629   | - | GTGACCTATGCACCAGACGTATCACATTAGGATGGAATAACCAAGTTTCAAGGCAAATAGATCGGAAGAGCGGTTTCAG     |
| chr9 | 5090396   | 5090435   | JAK2_630   | - | GTGACCTATGCACCAGACGTAAGGTGGAATAATGTTTACTCTGCCATATTACTGAAAGATCGGAAGAGCGGTTTCAG       |
| chr9 | 5090689   | 5090728   | JAK2_631   | - | GTGACCTATGCACCAGACGTAACATTTTCTTTCAGCTAGTTTATAAATAAAACAATTAGATCGGAAGAGCGGTTTCAG      |
| chr9 | 5122954   | 5122993   | JAK2_632   | - | GTGACCTATGCACCAGACGTGAATAAACATTTAAAGACAGTTACTTTGATATGTTGAGATCGGAAGAGCGGTTTCAG       |
| chr9 | 5126283   | 5126322   | JAK2_633   | - | GTGACCTATGCACCAGACGTCCCCTTTCAATATTTTTGTACATTTAATTTGTAGCAAAGATCGGAAGAGCGGTTTCAG      |
| chr9 | 5126634   | 5126673   | JAK2_634   | - | GTGACCTATGCACCAGACGTGAAAATAAACCAAAAATTAATGAACACTAAGGGCCATCTTAGATCGGAAGAGCGGTTTCAG   |
| chr4 | 55524132  | 55524171  | KIT_635    | - | GTGACCTATGCACCAGACGTGCGATGGGATCCGAGCTCTGTGCCAGTTCCAGCTCTCGCAGATCGGAAGAGCGGTTTCAG    |
| chr4 | 55561628  | 55561667  | KIT_636    | - | GTGACCTATGCACCAGACGTAACAGAAATCGTGTGAGTATGATCTTCTTCCCTGGCGAAAGATCGGAAGAGCGGTTTCAG    |
| chr4 | 55564400  | 55564439  | KIT_637    | - | GTGACCTATGCACCAGACGTATACAAAATCAGTAGTTGAAATGGCTGGTCACAGACAGATCGGAAGAGCGGTTTCAG       |
| chr4 | 55565746  | 55565785  | KIT_638    | - | GTGACCTATGCACCAGACGTGAAGAAATGTGGCCCTCAAATAATTTGTATTATAGCATGAAGATCGGAAGAGCGGTTTCAG   |

|       |           |           |           |   |                                                                                     |
|-------|-----------|-----------|-----------|---|-------------------------------------------------------------------------------------|
| chr4  | 55569840  | 55569879  | KIT_639   | - | GTGACCTATGCACCAGACGTGAGAAAAGGAGAAAAAATGAAGATTACCATATAATTTAGATCGGAAGAGCGGTTTCAG      |
| chr4  | 55573214  | 55573253  | KIT_640   | - | GTGACCTATGCACCAGACGTTGAAATAAGACAGAAAGAACCTTATCTACAACACTGAGATCGGAAGAGCGGTTTCAG       |
| chr4  | 55575540  | 55575579  | KIT_641   | - | GTGACCTATGCACCAGACGTAAGACAACCTAGTCAATCACCTGTGGATAGCATGCCTTGAAGATCGGAAGAGCGGTTTCAG   |
| chr4  | 55589700  | 55589739  | KIT_642   | - | GTGACCTATGCACCAGACGTACAGAAATGGCCATATGTCAGAGTGCCTGGAAAACCTCAGCAGATCGGAAGAGCGGTTTCAG  |
| chr4  | 55591973  | 55592012  | KIT_643   | - | GTGACCTATGCACCAGACGTGAAAAACAAAGCCCTGGCTTACTCTAGGAAAAATAAATAAAGATCGGAAGAGCGGTTTCAG   |
| chr4  | 55593334  | 55593373  | KIT_644   | - | GTGACCTATGCACCAGACGTAGAGAAATGTGGAATCACAACTTTTGGCAGGATGGGATCTAGATCGGAAGAGCGGTTTCAG   |
| chr4  | 55593532  | 55593571  | KIT_645   | - | GTGACCTATGCACCAGACGTAAAAGGAAAAAATGATCACCTTTTAATAATTATTGTCTCAAGATCGGAAGAGCGGTTTCAG   |
| chr4  | 55593939  | 55593978  | KIT_646   | - | GTGACCTATGCACCAGACGTGAAGACAACAAGGTAAGTGGTGTGCTGGTGGTGGAAAGATCGGAAGAGCGGTTTCAG       |
| chr4  | 55594127  | 55594166  | KIT_647   | - | GTGACCTATGCACCAGACGTAAACATGCATTTTAGCAAAAAGCACAACCTGGCAAACCTGATAGATCGGAAGAGCGGTTTCAG |
| chr4  | 55595451  | 55595490  | KIT_648   | - | GTGACCTATGCACCAGACGTATAAGAAAAGGTTAGAAGAAGGTTGAGATATATAGATTAAGATCGGAAGAGCGGTTTCAG    |
| chr4  | 55597444  | 55597483  | KIT_649   | - | GTGACCTATGCACCAGACGTTGAAACAAGTCATGACTGAATCAAGTGGGACATGTAGAAGAGATCGGAAGAGCGGTTTCAG   |
| chr4  | 55597987  | 55598026  | KIT_650   | - | GTGACCTATGCACCAGACGTGAGAGGATTTTTCTTAGCAATTACAACCATAAAGTTCAGGATCGGAAGAGCGGTTTCAG     |
| chr4  | 55599186  | 55599225  | KIT_651   | - | GTGACCTATGCACCAGACGTGGAGGAGAAAAGAACCTTTAAATTCATTTTAACTTGTAGATCGGAAGAGCGGTTTCAG      |
| chr4  | 55602614  | 55602653  | KIT_652   | - | GTGACCTATGCACCAGACGTAGCACAACAGAGTCAATAATGTTAATTCAGAAGCTCAACAAGATCGGAAGAGCGGTTTCAG   |
| chr4  | 55602837  | 55602876  | KIT_653   | - | GTGACCTATGCACCAGACGTGTTTGCAAAGCAGTGTAAATCACAAAGGAGCAGGACACCAAGATCGGAAGAGCGGTTTCAG   |
| chr4  | 55603291  | 55603330  | KIT_654   | - | GTGACCTATGCACCAGACGTAGGGGCCATTACTATCCCTCCTCAATGCCCTCAGCTTGTAGATCGGAAGAGCGGTTTCAG    |
| chr4  | 55604545  | 55604584  | KIT_655   | - | GTGACCTATGCACCAGACGTCAAGCCCATGCAATACAGCAGTCCCTACAACGAACATAAGATCGGAAGAGCGGTTTCAG     |
| chr10 | 43572657  | 43572696  | RET_656   | - | GTGACCTATGCACCAGACGTGCTGGGGCCAGGCTGGAGGAGCTGCGGGTACGGCCGAGATCGGAAGAGCGGTTTCAG       |
| chr10 | 43595857  | 43595896  | RET_657   | - | GTGACCTATGCACCAGACGTTAGGGAAGTGAAGTGAAGGATGGTGAAGATAAGGCTTCTTCAAGATCGGAAGAGCGGTTTCAG |
| chr10 | 43597740  | 43597779  | RET_658   | - | GTGACCTATGCACCAGACGTAAGTCAGGTCTGTGGGGGCATCGGCCACATCTGCCAGGCAAGATCGGAAGAGCGGTTTCAG   |
| chr10 | 43600350  | 43600389  | RET_659   | - | GTGACCTATGCACCAGACGTAGCAGACAGGGGCCCGCGTGATCACCAGCCGGGACCGGGAGATCGGAAGAGCGGTTTCAG    |
| chr10 | 43601774  | 43601813  | RET_660   | - | GTGACCTATGCACCAGACGTGAGAGGGCGTTGGTCAAGTGCAGGCGAGATGGGCCCTCAGAGATCGGAAGAGCGGTTTCAG   |
| chr10 | 43604429  | 43604468  | RET_661   | - | GTGACCTATGCACCAGACGTGGGCACAACAATGACCACCAAGCTGCTGTGGCTGCTTCTCAGATCGGAAGAGCGGTTTCAG   |
| chr10 | 43606605  | 43606644  | RET_662   | - | GTGACCTATGCACCAGACGTACAGGGAACACCTTAGCCAGGCAAGCTGGACCGGCTGAAGATCGGAAGAGCGGTTTCAG     |
| chr10 | 43607497  | 43607536  | RET_663   | - | GTGACCTATGCACCAGACGTGAGACAAGCAGGGTACAGGGGGCTGGCCCTGGGCCACGAGATCGGAAGAGCGGTTTCAG     |
| chr10 | 43608251  | 43608290  | RET_664   | - | GTGACCTATGCACCAGACGTACACAGCAGGCTGTACCCATGTGGGAGCCCCGCCACACAGATCGGAAGAGCGGTTTCAG     |
| chr10 | 43608954  | 43608993  | RET_665   | - | GTGACCTATGCACCAGACGTACGTAGCCCACTACGCCTCCTGGGGCCCTGACCACCCCAAGATCGGAAGAGCGGTTTCAG    |
| chr10 | 43609878  | 43609917  | RET_666   | - | GTGACCTATGCACCAGACGTGGGTGGTGTGAGGCTTGGCACCCGAGGCTCGGCACCAAGATCGGAAGAGCGGTTTCAG      |
| chr10 | 43611982  | 43612021  | RET_667   | - | GTGACCTATGCACCAGACGTAATGAGGGAAGGGGGAAGAGGGGGAAAAGTGTGAGGAAGATCGGAAGAGCGGTTTCAG      |
| chr10 | 43613771  | 43613810  | RET_668   | - | GTGACCTATGCACCAGACGTGCACAGAGCAGGTTGCAAAACGATCGCTCCTGGAAGCCCTAGATCGGAAGAGCGGTTTCAG   |
| chr10 | 43614929  | 43614968  | RET_669   | - | GTGACCTATGCACCAGACGTAGAGAGGGGGCCCTGGGCGTGGGGTCAAGGCTGGGCTAGATCGGAAGAGCGGTTTCAG      |
| chr10 | 43615479  | 43615518  | RET_670   | - | GTGACCTATGCACCAGACGTAATAGCACAGTGTGTCAGGCCATGGCCAGGCAGCAGCGGAGATCGGAAGAGCGGTTTCAG    |
| chr10 | 43617344  | 43617383  | RET_671   | - | GTGACCTATGCACCAGACGTGATGGAATAAAGACATTTGAAGTTACTCTAACTCTCTAGGAAGATCGGAAGAGCGGTTTCAG  |
| chr10 | 43619069  | 43619108  | RET_672   | - | GTGACCTATGCACCAGACGTTGAAAGGACCAGTGAAGTGGCTCCACCTGGCCCTCAGAGAGATCGGAAGAGCGGTTTCAG    |
| chr10 | 43620281  | 43620320  | RET_673   | - | GTGACCTATGCACCAGACGTGAAAGAGGCCAATATGATGCAACAGGAGGCCAGGTTCTAGATCGGAAGAGCGGTTTCAG     |
| chr10 | 43621973  | 43622012  | RET_674   | - | GTGACCTATGCACCAGACGTGAGATGGCCGGTCACTCCAAGCCATGTGCCACAACCTAGATAGATCGGAAGAGCGGTTTCAG  |
| chr10 | 43623510  | 43623549  | RET_675   | - | GTGACCTATGCACCAGACGTAACAGATCATTTGTTCTGCACTGAAGAACCAAACTTCAAGATCGGAAGAGCGGTTTCAG     |
| chr14 | 105236628 | 105236667 | AKT1_676  | - | GTGACCTATGCACCAGACGTGACTGCGCTGGACGATAGCTTGGAGGATGGAGAGGGCCGAGATCGGAAGAGCGGTTTCAG    |
| chr14 | 105237032 | 105237071 | AKT1_677  | - | GTGACCTATGCACCAGACGTACTGCCTGCCCCGCCCACTCCCTTTTCTCTCCACACTCAAGATCGGAAGAGCGGTTTCAG    |
| chr14 | 105238652 | 105238691 | AKT1_678  | - | GTGACCTATGCACCAGACGTTCCCGCATATTCACGCGCAGCATCTCCCCACATCTCAGATCGGAAGAGCGGTTTCAG       |
| chr14 | 105239165 | 105239204 | AKT1_679  | - | GTGACCTATGCACCAGACGTCCCATCCAGCTACAGCTACACCTCCATCCCTCATCCAGATCGGAAGAGCGGTTTCAG       |
| chr14 | 105239538 | 105239577 | AKT1_680  | - | GTGACCTATGCACCAGACGTCACTGCGTGCATACGCGTTGCTGCGTCCCCACGTCTGAAGATCGGAAGAGCGGTTTCAG     |
| chr14 | 105239742 | 105239781 | AKT1_681  | - | GTGACCTATGCACCAGACGTGGGCAGCAGGGGGGAGGGCCCTGGGGGCTGGCGGCACAGATCGGAAGAGCGGTTTCAG      |
| chr14 | 105240199 | 105240238 | AKT1_682  | - | GTGACCTATGCACCAGACGTGGGCTGCGGGGGATGACTTCGCGGCCCTGTGGGCCGCCAAGATCGGAAGAGCGGTTTCAG    |
| chr14 | 105241225 | 105241264 | AKT1_683  | - | GTGACCTATGCACCAGACGTGCCAGATGGGGCTGAAGGGCTGGGGCCAGGTAGCGACTCAGATCGGAAGAGCGGTTTCAG    |
| chr14 | 105241363 | 105241402 | AKT1_684  | - | GTGACCTATGCACCAGACGTGGCCAGTGGGGGAGGGTGGAGATGAGGGTGGGGGAGGATCGGAAGAGCGGTTTCAG        |
| chr14 | 105241939 | 105241978 | AKT1_685  | - | GTGACCTATGCACCAGACGTTCCCACTTCTGCCTGTGCCTGGGGTGCCTTGGACTGTGAGATCGGAAGAGCGGTTTCAG     |
| chr14 | 105242946 | 105242985 | AKT1_686  | - | GTGACCTATGCACCAGACGTTGTGGCGCCAGGCCAGGCACTTGGGCAGCCCCAGCGCTTAGATCGGAAGAGCGGTTTCAG    |
| chr14 | 105246375 | 105246414 | AKT1_687  | - | GTGACCTATGCACCAGACGTCTTGGCCCTCGGGATTACAGATTTGGGGGTTGGCTGGAAGATCGGAAGAGCGGTTTCAG     |
| chr14 | 105258885 | 105258924 | AKT1_688  | - | GTGACCTATGCACCAGACGTGCTGCCAGGGCTGGGCCCTGGGGAGGGAGAGATGGGGGTAGAGATCGGAAGAGCGGTTTCAG  |
| chr20 | 39766232  | 39766271  | PLCG1_689 | - | GTGACCTATGCACCAGACGTGGGGGCGGGCCAGGCGGCACAGGCAAGCCCGGGAGCAGATCGGAAGAGCGGTTTCAG       |
| chr20 | 39788196  | 39788235  | PLCG1_690 | - | GTGACCTATGCACCAGACGTAGCAAAGAGGCCAAGATCAAGCTGGGGTCTCCAGATCGGAAGAGCGGTTTCAG           |
| chr20 | 39788460  | 39788499  | PLCG1_691 | - | GTGACCTATGCACCAGACGTGGTATCAATAGCTGCCCCGAGGGCACATACTCCCACTGGAGATCGGAAGAGCGGTTTCAG    |
| chr20 | 39788696  | 39788735  | PLCG1_692 | - | GTGACCTATGCACCAGACGTAAGCCTGAGGTGAGGGCCACTTCTCCATCTACAGTCAGGCAGATCGGAAGAGCGGTTTCAG   |
| chr20 | 39791042  | 39791081  | PLCG1_693 | - | GTGACCTATGCACCAGACGTAGGGACATCCCAAGTGGTCTCATCCAGCTTCTCATGACCTAGATCGGAAGAGCGGTTTCAG   |
| chr20 | 39791232  | 39791271  | PLCG1_694 | - | GTGACCTATGCACCAGACGTTAGAGCAGGAGTGCAGCTCAGGCAGCTCAGGCCCCAGCTGAGATCGGAAGAGCGGTTTCAG   |
| chr20 | 39791548  | 39791587  | PLCG1_695 | - | GTGACCTATGCACCAGACGTGACAACCTGGTCAGGGCAAGACCTGGGAGGCCATGTGGAGATCGGAAGAGCGGTTTCAG     |
| chr20 | 39791793  | 39791832  | PLCG1_696 | - | GTGACCTATGCACCAGACGTGAAGGTAAGCTAGCTAGTATGCTCAACAGACAACAAGGTAGATCGGAAGAGCGGTTTCAG    |

|       |          |          |             |   |                                                                                    |
|-------|----------|----------|-------------|---|------------------------------------------------------------------------------------|
| chr20 | 39791968 | 39792007 | PLCG1_697   | - | GTGACCTATGCACCAGACGTAGGGAGGGCAGGGGATGAGAGAAGCCTCCAGTCAGGGATGAGATCGGAAGAGCGGTTTCAG  |
| chr20 | 39792305 | 39792344 | PLCG1_698   | - | GTGACCTATGCACCAGACGTACATGTGGAAGGGAAGAGACAGTGAGTCCCTGCCCTGTCCAGATCGGAAGAGCGGTTTCAG  |
| chr20 | 39792511 | 39792550 | PLCG1_699   | - | GTGACCTATGCACCAGACGTAAGGAGAGGACAGGTAGGTATGGTCAGATGGGCCCTCCTGGAGATCGGAAGAGCGGTTTCAG |
| chr20 | 39792671 | 39792710 | PLCG1_700   | - | GTGACCTATGCACCAGACGTACATCACCATGGTCAAGCGGGCAGGCCTCCCATCTCCCTAGATCGGAAGAGCGGTTTCAG   |
| chr20 | 39793523 | 39793562 | PLCG1_701   | - | GTGACCTATGCACCAGACGTGGGGACAAGCAGATGAACAGATTCTGCAATCTCTGGGAGATCGGAAGAGCGGTTTCAG     |
| chr20 | 39793835 | 39793874 | PLCG1_702   | - | GTGACCTATGCACCAGACGTAACCAAGAAGCGGCAATGCAGACCCGATCCTCACCCACAGATCGGAAGAGCGGTTTCAG    |
| chr20 | 39794040 | 39794079 | PLCG1_703   | - | GTGACCTATGCACCAGACGTCCAAGAGGGGACTGTGAGCCAGGGCTCTCACACCCACTGAGATCGGAAGAGCGGTTTCAG   |
| chr20 | 39794229 | 39794268 | PLCG1_704   | - | GTGACCTATGCACCAGACGTAAGGCAACAGCAAAGATACTGTGACCCTGGCCAGGCCCTGAGATCGGAAGAGCGGTTTCAG  |
| chr20 | 39794784 | 39794823 | PLCG1_705   | - | GTGACCTATGCACCAGACGTACAGAGTGAGGGAGGCTGGGAAAACAGGCCAGGGCCCCAGATCGGAAGAGCGGTTTCAG    |
| chr20 | 39795066 | 39795105 | PLCG1_706   | - | GTGACCTATGCACCAGACGTGCAGAGTCAGGCCCGGCCAGCACCCCATGGCCCTGCCAGATCGGAAGAGCGGTTTCAG     |
| chr20 | 39795269 | 39795308 | PLCG1_707   | - | GTGACCTATGCACCAGACGTACAAAACAGTCACACAGGGTCAGGGCAGCTCAGACCCAAGAGATCGGAAGAGCGGTTTCAG  |
| chr20 | 39796442 | 39796481 | PLCG1_708   | - | GTGACCTATGCACCAGACGTGACACAATGGGATGTTAATGCCCCAGGCCAGAGCTAAGATCGGAAGAGCGGTTTCAG      |
| chr20 | 39797357 | 39797396 | PLCG1_709   | - | GTGACCTATGCACCAGACGTGAGAAGCACCAGTCAGAGCAGAAAGGGCTCTCCCTGCCACTAGATCGGAAGAGCGGTTTCAG |
| chr20 | 39797669 | 39797708 | PLCG1_710   | - | GTGACCTATGCACCAGACGTACAGGGTGTGACCTCCAGCAACACCCCGAAGTCCCATAGATCGGAAGAGCGGTTTCAG     |
| chr20 | 39798047 | 39798086 | PLCG1_711   | - | GTGACCTATGCACCAGACGTCAAAGCCCACCAATGGTCAGCATGGCTACTGCATATGTGTAGATCGGAAGAGCGGTTTCAG  |
| chr20 | 39798702 | 39798741 | PLCG1_712   | - | GTGACCTATGCACCAGACGTGAGAGCAGATAACAGCTGGGAATAGACATCTCACCCCTCAGATCGGAAGAGCGGTTTCAG   |
| chr20 | 39800783 | 39800822 | PLCG1_713   | - | GTGACCTATGCACCAGACGTACACAAGGCCCTGTAGCCCCAGGCTACAGCCCTGCCAGGAGATCGGAAGAGCGGTTTCAG   |
| chr20 | 39801011 | 39801050 | PLCG1_714   | - | GTGACCTATGCACCAGACGTGAGGAAAACACTTACAGAGCCGCCACCCAGGAAGTGTAGATCGGAAGAGCGGTTTCAG     |
| chr20 | 39801319 | 39801358 | PLCG1_715   | - | GTGACCTATGCACCAGACGTGAGATTATGGTGTATTCCAGTCCAGCTGCCCCACAGTCCAGATCGGAAGAGCGGTTTCAG   |
| chr20 | 39802010 | 39802049 | PLCG1_716   | - | GTGACCTATGCACCAGACGTACAAAGAAGGGCCTGGGATGTCTTCTGCTCCCTCAAAGATCGGAAGAGCGGTTTCAG      |
| chr20 | 39802242 | 39802281 | PLCG1_717   | - | GTGACCTATGCACCAGACGTAAAGCAAAAGGCTTCAGGTACCCTGGGAGAGGATGGGAAGATCGGAAGAGCGGTTTCAG    |
| chr20 | 39802513 | 39802552 | PLCG1_718   | - | GTGACCTATGCACCAGACGTGAAAAGCCTGGCCCTCAGCCCACGAGGGACAGCAAGGGAGATCGGAAGAGCGGTTTCAG    |
| chr20 | 39802714 | 39802753 | PLCG1_719   | - | GTGACCTATGCACCAGACGTGCCAGGTGCACAAGAGGGTCAATGACTCCTCTGCATCTTAGATCGGAAGAGCGGTTTCAG   |
| chr20 | 39802717 | 39802756 | PLCG1_720   | - | GTGACCTATGCACCAGACGTGAAGCCAGGTGACAAGAGGGTCAAGTACTCCTCTGCATCTAGATCGGAAGAGCGGTTTCAG  |
| chr20 | 39803057 | 39803096 | PLCG1_721   | - | GTGACCTATGCACCAGACGTGGGAAGAGTGTCTTACTGGCAGGCAGGGCCTTGCAGCCAGATCGGAAGAGCGGTTTCAG    |
| chr19 | 11094778 | 11094817 | SMARCA4_722 | - | GTGACCTATGCACCAGACGTGCTGCAGACAGTGGCCTCCTGCTGGAAGACAGTCTGGTCAGATCGGAAGAGCGGTTTCAG   |
| chr19 | 11095899 | 11095938 | SMARCA4_723 | - | GTGACCTATGCACCAGACGTGACCATGGCAAGGCAGGGTCAGCATGTGGAACGTGAGGTGAGATCGGAAGAGCGGTTTCAG  |
| chr19 | 11096815 | 11096854 | SMARCA4_724 | - | GTGACCTATGCACCAGACGTAGGTGAGCCCACTGGTCACTCGGCAGCATATGCTGTGTAGATCGGAAGAGCGGTTTCAG    |
| chr19 | 11097531 | 11097570 | SMARCA4_725 | - | GTGACCTATGCACCAGACGTGGAGAACAAGAGAAACAGTGCCTCCAGGTTTATGCAGATCGGAAGAGCGGTTTCAG       |
| chr19 | 11098292 | 11098331 | SMARCA4_726 | - | GTGACCTATGCACCAGACGTGCAAGGGGCCAGGGCTCATGTTGAGCTCTGGGGCCCATCAGATCGGAAGAGCGGTTTCAG   |
| chr19 | 11099943 | 11099982 | SMARCA4_727 | - | GTGACCTATGCACCAGACGTAGACAAGGAGCAAAGGCGGTGAGAGGGTTGCCAGGGCACCAGATCGGAAGAGCGGTTTCAG  |
| chr19 | 11101776 | 11101815 | SMARCA4_728 | - | GTGACCTATGCACCAGACGTGAAGAGGACAAGCCCGCAGCTGCACAGCTCTGTGGCAGATCGGAAGAGCGGTTTCAG      |
| chr19 | 11105454 | 11105493 | SMARCA4_729 | - | GTGACCTATGCACCAGACGTGCACAAAAGAGAAGGCTGACCCTTACAGCAGCATGGTGGACAGATCGGAAGAGCGGTTTCAG |
| chr19 | 11106839 | 11106878 | SMARCA4_730 | - | GTGACCTATGCACCAGACGTATGGGGTTACTGCAATGTGGTGGCACAATGTGCATGTCTAGATCGGAAGAGCGGTTTCAG   |
| chr19 | 11107120 | 11107159 | SMARCA4_731 | - | GTGACCTATGCACCAGACGTAGAGAGACAGCTGACGGGTCAGCCACAAGGCTGAGCCAGATCGGAAGAGCGGTTTCAG     |
| chr19 | 11113655 | 11113694 | SMARCA4_732 | - | GTGACCTATGCACCAGACGTGTCAATCGTGTGACACTGAGGTTGCAGGGCCTCCAGACCAAGATCGGAAGAGCGGTTTCAG  |
| chr19 | 11113966 | 11114005 | SMARCA4_733 | - | GTGACCTATGCACCAGACGTTGTAAGGGCTTTCATACAAATCTGCTCAGAGCCAGCAGAAAGATCGGAAGAGCGGTTTCAG  |
| chr19 | 11118528 | 11118567 | SMARCA4_734 | - | GTGACCTATGCACCAGACGTACAAAGCCATGTCACTCAGTTTATCCCCAGAGAGGGGAGATCGGAAGAGCGGTTTCAG     |
| chr19 | 11121007 | 11121046 | SMARCA4_735 | - | GTGACCTATGCACCAGACGTGATGGAGGTGCCGGTAAGGACACACATTCTATCTGTGAAGATCGGAAGAGCGGTTTCAG    |
| chr19 | 11123575 | 11123614 | SMARCA4_736 | - | GTGACCTATGCACCAGACGTAGATGCGCCACGCCAGGACTGAAGGCCGGTCGGACACCAGATCGGAAGAGCGGTTTCAG    |
| chr19 | 11129583 | 11129622 | SMARCA4_737 | - | GTGACCTATGCACCAGACGTAAGGAAATGAGAGTCAAGTGCAGGCTCTCATCAATGGCTAGATCGGAAGAGCGGTTTCAG   |
| chr19 | 11130217 | 11130256 | SMARCA4_738 | - | GTGACCTATGCACCAGACGTAGCAGGATGCACAGCTCGGCTTTTGGAGCCGGTGGCCAGAGATCGGAAGAGCGGTTTCAG   |
| chr19 | 11132351 | 11132390 | SMARCA4_739 | - | GTGACCTATGCACCAGACGTGAGAGTGGGCAATCAGGGCAGGGGGCAGCAGGTGGCCCGGAGATCGGAAGAGCGGTTTCAG  |
| chr19 | 11134144 | 11134183 | SMARCA4_740 | - | GTGACCTATGCACCAGACGTCCAAGACAGGAGAAGCAAGCGTTACCTCAAAGGAGGGCGAGATCGGAAGAGCGGTTTCAG   |
| chr19 | 11134957 | 11134996 | SMARCA4_741 | - | GTGACCTATGCACCAGACGTACATAATGCTCACAGAGGGCCAAAGTGGCTTGGAGCCCTGAGATCGGAAGAGCGGTTTCAG  |
| chr19 | 11136048 | 11136087 | SMARCA4_742 | - | GTGACCTATGCACCAGACGTGATGAGAGGCAACCAAGTGGGTCTTGCCTCCTGGGTGAGATCGGAAGAGCGGTTTCAG     |
| chr19 | 11136926 | 11136965 | SMARCA4_743 | - | GTGACCTATGCACCAGACGTAGGAGAGAGGGTCAAGTGCAGGCGAGGAGCAGGCCACCGGAGATCGGAAGAGCGGTTTCAG  |
| chr19 | 11138410 | 11138449 | SMARCA4_744 | - | GTGACCTATGCACCAGACGTGAGGAGGCAGGAGAGAAGGCGCAGGATGTTAACTGGAAGATCGGAAGAGCGGTTTCAG     |
| chr19 | 11141356 | 11141395 | SMARCA4_745 | - | GTGACCTATGCACCAGACGTGAGAGGAGAAGAGGGTCAAGCGGGTGCACCTCAGGGGTAGAAGATCGGAAGAGCGGTTTCAG |
| chr19 | 11143916 | 11143955 | SMARCA4_746 | - | GTGACCTATGCACCAGACGTAGGTGCCAGTCAAGTCCCAAAGGAGCCAGGAGTGCATAAAAGATCGGAAGAGCGGTTTCAG  |
| chr19 | 11144749 | 11144788 | SMARCA4_747 | - | GTGACCTATGCACCAGACGTGCAAAGTCAAGTCCGCTGAGGAGGGCCGGGTGGCCAGATCGGAAGAGCGGTTTCAG       |
| chr19 | 11145540 | 11145579 | SMARCA4_748 | - | GTGACCTATGCACCAGACGTGGGAGCAACGGGACAGGATCAGCATGCAGGCACAGGGAGATCGGAAGAGCGGTTTCAG     |
| chr19 | 11151924 | 11151963 | SMARCA4_749 | - | GTGACCTATGCACCAGACGTAAAATAGGACAGCCAGCACCCAGGTCGACAAGCAGAGGCCAGATCGGAAGAGCGGTTTCAG  |
| chr19 | 11151933 | 11151972 | SMARCA4_750 | - | GTGACCTATGCACCAGACGTAATAGTAGTAAATAGGACAGCCAGCACCCAGGTCGACAAGATCGGAAGAGCGGTTTCAG    |
| chr19 | 11168881 | 11168920 | SMARCA4_751 | - | GTGACCTATGCACCAGACGTGAACCGGCGGCTATCACCCCGAGTCCGCCACCCGGGAGATCGGAAGAGCGGTTTCAG      |
| chr19 | 11168884 | 11168923 | SMARCA4_752 | - | GTGACCTATGCACCAGACGTGCAAGACCGGCGGCTATCACCCCGAGTCCGCCACCCGGGAGATCGGAAGAGCGGTTTCAG   |
| chr19 | 11169414 | 11169453 | SMARCA4_753 | - | GTGACCTATGCACCAGACGTGCGGAGGAGCGTTCACCTCAGGCCCGCCCTGCCTGAGATCGGAAGAGCGGTTTCAG       |
| chr19 | 11170379 | 11170418 | SMARCA4_754 | - | GTGACCTATGCACCAGACGTACACAGGGGCTTGAAGTGGATGGGCCCGACTGGAGGGCTGAGATCGGAAGAGCGGTTTCAG  |

|       |          |          |             |   |                                                                                     |
|-------|----------|----------|-------------|---|-------------------------------------------------------------------------------------|
| chr19 | 11170671 | 11170710 | SMARCA4_755 | - | GTGACCTATGCACCAGACGTCGGGGAGGAAAGACAGCCTTGAGCTCTGGGAATGCAGCAAGATCGGAAGAGCGGTTTCAG    |
| chr19 | 11172410 | 11172449 | SMARCA4_756 | - | GTGACCTATGCACCAGACGTCGACAGGAGGAGAGAGTGTGCGTTGGCCACCCTGCCAGGGAGATCGGAAGAGCGGTTTCAG   |
| chr16 | 68772150 | 68772189 | CDH1_757    | - | GTGACCTATGCACCAGACGTGGAAGGTAGATGGAACCGGGTGACTCGGAGGGTTCCTCAGATCGGAAGAGCGGTTTCAG     |
| chr16 | 68835523 | 68835562 | CDH1_758    | - | GTGACCTATGCACCAGACGTGAAATCACAGAGATTAGGAAATGGACAGATTAAGACAAAGATCGGAAGAGCGGTTTCAG     |
| chr16 | 68842277 | 68842316 | CDH1_759    | - | GTGACCTATGCACCAGACGTAGAGATGAGGAACAAGATAAGACAATTCAGACGGATACAGATCGGAAGAGCGGTTTCAG     |
| chr16 | 68842546 | 68842585 | CDH1_760    | - | GTGACCTATGCACCAGACGTAAATGAAAGAAAAAGAAATAGTAAAGAAAGGATCCCAACACTAGATCGGAAGAGCGGTTTCAG |
| chr16 | 68844050 | 68844089 | CDH1_761    | - | GTGACCTATGCACCAGACGTCAAGTGAGGGTGACTTGAGCCTGTGATGAGGAAGAAAAACATAGATCGGAAGAGCGGTTTCAG |
| chr16 | 68845537 | 68845576 | CDH1_762    | - | GTGACCTATGCACCAGACGTTCAAGGAGATGAAGGTTTGTAGACAAGCTGCACTTTGGGACTAGATCGGAAGAGCGGTTTCAG |
| chr16 | 68845988 | 68846027 | CDH1_763    | - | GTGACCTATGCACCAGACGTATCGACACAACCAAGTCAGGACCAGGAACACTAGCCACCTAGATCGGAAGAGCGGTTTCAG   |
| chr16 | 68847166 | 68847205 | CDH1_764    | - | GTGACCTATGCACCAGACGTAAAGAGATGTGTCAATTCACAAAGTACCAAGACTGCTAGCAGAGATCGGAAGAGCGGTTTCAG |
| chr16 | 68849368 | 68849407 | CDH1_765    | - | GTGACCTATGCACCAGACGTGAAACAATGAAGTTAAAAACAAAACGAAACATTTTGTGTTAGATCGGAAGAGCGGTTTCAG   |
| chr16 | 68853133 | 68853172 | CDH1_766    | - | GTGACCTATGCACCAGACGTACAAGCTCTGGCTTTTGAATAGGACCAGCAAAACAACATGAGATCGGAAGAGCGGTTTCAG   |
| chr16 | 68855854 | 68855893 | CDH1_767    | - | GTGACCTATGCACCAGACGTATACACAGAAAATGTGGCAGCTTGGCAACAGTAATGAATCAGATCGGAAGAGCGGTTTCAG   |
| chr16 | 68857252 | 68857291 | CDH1_768    | - | GTGACCTATGCACCAGACGTCAATAAAAAAGAAATGATGAGACCAGGGGAGGAAAATAAAAAAGATCGGAAGAGCGGTTTCAG |
| chr16 | 68862027 | 68862066 | CDH1_769    | - | GTGACCTATGCACCAGACGTGGGGGAGACAGAGCAAGTGTGAGAGCCAAAGATAAAGAAAGATCGGAAGAGCGGTTTCAG    |
| chr16 | 68863507 | 68863546 | CDH1_770    | - | GTGACCTATGCACCAGACGTAAAAGGTTGAAGTACAATGAAGAGTAGGAAAGAAATAGTCAGATCGGAAGAGCGGTTTCAG   |
| chr16 | 68867143 | 68867182 | CDH1_771    | - | GTGACCTATGCACCAGACGTAGGGACAAAAGCATCTTTAGTGAAGGAAGGGCACACCTAGATCGGAAGAGCGGTTTCAG     |
| chr6  | 36651829 | 36651868 | CDKN1A_772  | - | GTGACCTATGCACCAGACGTGACAGATAACAGGAAGGCCCTGGTACGGCGGAGATAGAGCTCGGAAGAGCGGTTTCAG      |
| chr6  | 36653478 | 36653517 | CDKN1A_773  | - | GTGACCTATGCACCAGACGTACACGATAAGTCAGCCAGGCCAAGAAGAAGAGAGCGGGCAGATCGGAAGAGCGGTTTCAG    |
| chr19 | 10244293 | 10244332 | DNMT1_774   | - | GTGACCTATGCACCAGACGTCCGTCACCCCTGTTTCTGGCACCAGGAATCCCAACATGCAGATCGGAAGAGCGGTTTCAG    |
| chr19 | 10244843 | 10244882 | DNMT1_775   | - | GTGACCTATGCACCAGACGTGTGGGGCAGGCTTCCTCTGGGGCCTGACTGCCCTCTGGGGAGATCGGAAGAGCGGTTTCAG   |
| chr19 | 10246362 | 10246401 | DNMT1_776   | - | GTGACCTATGCACCAGACGTGGCGCCCGCTGGGTCTGGACAGGAAGGAGGCTTCTGTGCAGATCGGAAGAGCGGTTTCAG    |
| chr19 | 10246747 | 10246786 | DNMT1_777   | - | GTGACCTATGCACCAGACGTAGGGGGCAGCCGAGGGCCTGGTTCAGGCCCTGTACTTGGCAGATCGGAAGAGCGGTTTCAG   |
| chr19 | 10247711 | 10247750 | DNMT1_778   | - | GTGACCTATGCACCAGACGTAAAGTTGTGGTTCCTCCGGTGGGCTGAGGGGAAGGAAGGCAGATCGGAAGAGCGGTTTCAG   |
| chr19 | 10248458 | 10248497 | DNMT1_779   | - | GTGACCTATGCACCAGACGTCTGACAGAGCGGCTCCTCCTCGAGGCCAGCCAGCAGCAGATCGGAAGAGCGGTTTCAG      |
| chr19 | 10249065 | 10249104 | DNMT1_780   | - | GTGACCTATGCACCAGACGTCCCCTGCTCCTCCACACACTGCCGAGCAGGCCTCAGTAGAGATCGGAAGAGCGGTTTCAG    |
| chr19 | 10250302 | 10250341 | DNMT1_781   | - | GTGACCTATGCACCAGACGTGGGCTGGGGCGGGCAGACAGATGTGGCCAGCACGTGACCCAGATCGGAAGAGCGGTTTCAG   |
| chr19 | 10250672 | 10250711 | DNMT1_782   | - | GTGACCTATGCACCAGACGTAGAAGCCCCCAGTGTGTCACAGCCGCCCGGGGCTGTGCCAGATCGGAAGAGCGGTTTCAG    |
| chr19 | 10251407 | 10251446 | DNMT1_783   | - | GTGACCTATGCACCAGACGTGTAGGCTCCTCTGTAACACTGGTGAGCCAGCCGAGATCGGAAGAGCGGTTTCAG          |
| chr19 | 10251731 | 10251770 | DNMT1_784   | - | GTGACCTATGCACCAGACGTGATGAGTTTCTTCAAGTTATTCTCTGTAACCTGGAGAGATCGGAAGAGCGGTTTCAG       |
| chr19 | 10252654 | 10252693 | DNMT1_785   | - | GTGACCTATGCACCAGACGTTGCTTGCTAGAGGGAAGGCTTCGGGGTCAAAGTTGGCCAGAGATCGGAAGAGCGGTTTCAG   |
| chr19 | 10254392 | 10254431 | DNMT1_786   | - | GTGACCTATGCACCAGACGTGCCTCTGTTCTTCCACGAGGCCACAGACTCTTCTAGAAGGAGATCGGAAGAGCGGTTTCAG   |
| chr19 | 10256977 | 10257016 | DNMT1_787   | - | GTGACCTATGCACCAGACGTCTCGGAGCAGCCGGGGCCAGGGCGCTCCAGGCTGAGCCAAGATCGGAAGAGCGGTTTCAG    |
| chr19 | 10259510 | 10259549 | DNMT1_788   | - | GTGACCTATGCACCAGACGTGGGCTGGGCTCGGGTCCAGCGACTTTTCAGCCACATCAGATCGGAAGAGCGGTTTCAG      |
| chr19 | 10260079 | 10260118 | DNMT1_789   | - | GTGACCTATGCACCAGACGTGGTGCCTCTGCTGAGCCCTCAGCCTTATCTGAGGGTACACAGATCGGAAGAGCGGTTTCAG   |
| chr19 | 10260479 | 10260518 | DNMT1_790   | - | GTGACCTATGCACCAGACGTTTTCTTTTGTGCTTACTGCTGATGCACTTTCTCATCAAGTAGATCGGAAGAGCGGTTTCAG   |
| chr19 | 10262024 | 10262063 | DNMT1_791   | - | GTGACCTATGCACCAGACGTGAGCCCTTGGTCACTGCTACTGCCATGTTCCAATAAGCAAGATCGGAAGAGCGGTTTCAG    |
| chr19 | 10262376 | 10262415 | DNMT1_792   | - | GTGACCTATGCACCAGACGTCCGAGTCTTCTCCTCTGTGGCAGAGGACTTGGCAGCTGGTGAGATCGGAAGAGCGGTTTCAG  |
| chr19 | 10264919 | 10264958 | DNMT1_793   | - | GTGACCTATGCACCAGACGTCTGTGGTGCTCCCGCTCCCTAAGTGGCCAGCCTCTGAGATCGGAAGAGCGGTTTCAG       |
| chr19 | 10265212 | 10265251 | DNMT1_794   | - | GTGACCTATGCACCAGACGTGGCAGGACAGATGAAGACTGGAGCCGGGAGGTAGATCGGAAGAGCGGTTTCAG           |
| chr19 | 10265531 | 10265570 | DNMT1_795   | - | GTGACCTATGCACCAGACGTGAGGGTCTCAGACTCCGGGATTCGCTGAAACTGGAAACTTGCAGATCGGAAGAGCGGTTTCAG |
| chr19 | 10266479 | 10266518 | DNMT1_796   | - | GTGACCTATGCACCAGACGTGGCCCATCATAGGCTGGCCGGGGTCTGAAAGGGGCCTCAAGATCGGAAGAGCGGTTTCAG    |
| chr19 | 10270284 | 10270323 | DNMT1_797   | - | GTGACCTATGCACCAGACGTTTTCTGTTGTCATGTTTGTCTGTTGGAAGGAGGCACATCCAGATCGGAAGAGCGGTTTCAG   |
| chr19 | 10270468 | 10270507 | DNMT1_798   | - | GTGACCTATGCACCAGACGTCTCTCTTCCAGCCTCCTCTGCTGTCCCTGTCCACTAGATCGGAAGAGCGGTTTCAG        |
| chr19 | 10270644 | 10270683 | DNMT1_799   | - | GTGACCTATGCACCAGACGTGCCGGGAATAAAGCCGGTGGCGGGCTCACGAGGCGGCTGAGATCGGAAGAGCGGTTTCAG    |
| chr19 | 10271010 | 10271049 | DNMT1_800   | - | GTGACCTATGCACCAGACGTATTCTTGAAGTATCGAAAGCAGATGGTAATGTTAAATGAGATCGGAAGAGCGGTTTCAG     |
| chr19 | 10273952 | 10273991 | DNMT1_801   | - | GTGACCTATGCACCAGACGTAAATGCTTGTGCTTTTGTGTCATCTGGATCAGTAGAAAGAGATCGGAAGAGCGGTTTCAG    |
| chr19 | 10277224 | 10277263 | DNMT1_802   | - | GTGACCTATGCACCAGACGTGTTATTTGTTTCTGAACTCCCCCTCATTCTTCTGCTCCTGAGATCGGAAGAGCGGTTTCAG   |
| chr19 | 10278956 | 10278995 | DNMT1_803   | - | GTGACCTATGCACCAGACGTGCAACCTGCCTTTGTGCTTTGTTGTAAGTGAATTGCTAAGATCGGAAGAGCGGTTTCAG     |
| chr19 | 10283716 | 10283755 | DNMT1_804   | - | GTGACCTATGCACCAGACGTATCACCTCAAGTTTGTAAATCTCCCTTAATCCTATATGAGATCGGAAGAGCGGTTTCAG     |
| chr19 | 10284497 | 10284536 | DNMT1_805   | - | GTGACCTATGCACCAGACGTTTACTATACCTTTCTTTTGTCTACGAGTGTGTAATAGATCGGAAGAGCGGTTTCAG        |
| chr19 | 10286166 | 10286205 | DNMT1_806   | - | GTGACCTATGCACCAGACGTGGCTTTCATTTCTGACTCTACCTTACCTAAGTTGTTGATTTGATCGGAAGAGCGGTTTCAG   |
| chr19 | 10287918 | 10287957 | DNMT1_807   | - | GTGACCTATGCACCAGACGTGATAAATGGCGGCTGCCTTTTTAGGGGCCGGCTGTTTTAGATCGGAAGAGCGGTTTCAG     |
| chr19 | 10291404 | 10291443 | DNMT1_808   | - | GTGACCTATGCACCAGACGTTCTCAGCATCCTAGCCTCTAGAAAAATGCTCCTCCTAGTAGATCGGAAGAGCGGTTTCAG    |
| chr19 | 10292667 | 10292706 | DNMT1_809   | - | GTGACCTATGCACCAGACGTCTTAAATTTTTCTTATTACCAATCTGACTGACACACTAGATCGGAAGAGCGGTTTCAG      |
| chr19 | 10305446 | 10305485 | DNMT1_810   | - | GTGACCTATGCACCAGACGTTGGGGGGAAACACGGACTCAGGGGACAGGCGGCTGAGATCGGAAGAGCGGTTTCAG        |
| chr12 | 56474035 | 56474074 | ERBB3_811   | - | GTGACCTATGCACCAGACGTAGGGTGAAGGGAGCCAGCCAGCTCCGGCCGGGGCCAGATCGGAAGAGCGGTTTCAG        |
| chr12 | 56477485 | 56477524 | ERBB3_812   | - | GTGACCTATGCACCAGACGTAGAGGGAAGAGTGGCTGAGGGTGGACACAAATTTCTCAGAGATCGGAAGAGCGGTTTCAG    |

|       |           |           |            |   |                                                                                      |
|-------|-----------|-----------|------------|---|--------------------------------------------------------------------------------------|
| chr12 | 56478729  | 56478768  | ERBB3_813  | - | GTGACCTATGCACCAGACGTGCAGATTATGTAATGAGAGAGACAACAGGGCAAATAATAGATCGGAAGAGCGGTTTCAG      |
| chr12 | 56480265  | 56480304  | ERBB3_814  | - | GTGACCTATGCACCAGACGTGAAAAGAAGTGACAGGGTTAAGGGCCGACGCGGAACGCCTCAGATCGGAAGAGCGGTTTCAG   |
| chr12 | 56481311  | 56481350  | ERBB3_815  | - | GTGACCTATGCACCAGACGTAGGAAGGCAACACAAGGGGCCATCAGGGCTAAGAAAGGCTAGATCGGAAGAGCGGTTTCAG    |
| chr12 | 56481529  | 56481568  | ERBB3_816  | - | GTGACCTATGCACCAGACGTAGAGAAAGCATGGCTGTTAGGGCTCCTAGGACTGAATCTAGATCGGAAGAGCGGTTTCAG     |
| chr12 | 56481755  | 56481794  | ERBB3_817  | - | GTGACCTATGCACCAGACGTAGGAGGCTCATCAGATTATGTTACGTGTGACCCTACCAGATCGGAAGAGCGGTTTCAG       |
| chr12 | 56482277  | 56482316  | ERBB3_818  | - | GTGACCTATGCACCAGACGTGGAGGAGGACACATTAGAGATGAGGGAGGAACATCACCAAGATCGGAAGAGCGGTTTCAG     |
| chr12 | 56482482  | 56482521  | ERBB3_819  | - | GTGACCTATGCACCAGACGTAAAGAGAGGTTACGTGGGGTGTGCTGCGCAGGCTCAGAGGAGATCGGAAGAGCGGTTTCAG    |
| chr12 | 56486720  | 56486759  | ERBB3_820  | - | GTGACCTATGCACCAGACGTGGAGAGAGGCATATGGGCAGGGAGCCTTCTTCTTTCTTGGAGATCGGAAGAGCGGTTTCAG    |
| chr12 | 56487079  | 56487118  | ERBB3_821  | - | GTGACCTATGCACCAGACGTGGAGACAGGATGAGAGGAGAGACTACTAAGGGAACATTAAGATCGGAAGAGCGGTTTCAG     |
| chr12 | 56487498  | 56487537  | ERBB3_822  | - | GTGACCTATGCACCAGACGTAGGGGTGGGTTAGGAGAGGAGTCTGAGGACTCCAGCAAGAGATCGGAAGAGCGGTTTCAG     |
| chr12 | 56487833  | 56487872  | ERBB3_823  | - | GTGACCTATGCACCAGACGTGAATAAAGGGAGGGGGGGGTCACCTCCAAGTCTGACCTTAGATCGGAAGAGCGGTTTCAG     |
| chr12 | 56488136  | 56488175  | ERBB3_824  | - | GTGACCTATGCACCAGACGTGAGAGAAGGTCAGGAAGAATCAGATCCCAAGGTCAATCCAGATCGGAAGAGCGGTTTCAG     |
| chr12 | 56488991  | 56489030  | ERBB3_825  | - | GTGACCTATGCACCAGACGTAAAGTACCACCTTAAATGAGAGCTGGACAGCAGAGGCTCAGATCGGAAGAGCGGTTTCAG     |
| chr12 | 56489399  | 56489438  | ERBB3_826  | - | GTGACCTATGCACCAGACGTTATAGAAACCCAACATTATCCTGGGTTTGCATCTTCTTAAGATCGGAAGAGCGGTTTCAG     |
| chr12 | 56490237  | 56490276  | ERBB3_827  | - | GTGACCTATGCACCAGACGTAATGGGAAGGATTAAGTACTCAGGAAAGGCCATCCCATGTCAGATCGGAAGAGCGGTTTCAG   |
| chr12 | 56490482  | 56490521  | ERBB3_828  | - | GTGACCTATGCACCAGACGTTGGGGCAGGAGTTGGCATAAGGTCATTCTCCCTAGGTCAAAGATCGGAAGAGCGGTTTCAG    |
| chr12 | 56490779  | 56490818  | ERBB3_829  | - | GTGACCTATGCACCAGACGTCAAAGGTTATTCTAGGAAACCAACAGGTTACATACACAGATCGGAAGAGCGGTTTCAG       |
| chr12 | 56491519  | 56491558  | ERBB3_830  | - | GTGACCTATGCACCAGACGTAGGGGAAGAAAGTATTTCTTAAGGTTGGGGAAATCAGTACAGATCGGAAGAGCGGTTTCAG    |
| chr12 | 56492234  | 56492273  | ERBB3_831  | - | GTGACCTATGCACCAGACGTAAGATAGAGGTATCACAAAGTTTATTTCCACAAATTTCTTAGATCGGAAGAGCGGTTTCAG    |
| chr12 | 56492493  | 56492532  | ERBB3_832  | - | GTGACCTATGCACCAGACGTAAGACATGGACTAGTCACTGGCAAATAGTAGACATGGGCAGATCGGAAGAGCGGTTTCAG     |
| chr12 | 56493572  | 56493611  | ERBB3_833  | - | GTGACCTATGCACCAGACGTAGGTTGATTGTTAGGGGAATCCTGGTTCAGCCAACTCCTAGATCGGAAGAGCGGTTTCAG     |
| chr12 | 56493908  | 56493947  | ERBB3_834  | - | GTGACCTATGCACCAGACGTAAATAAGGAAAAGGTTAAGATGAAGGGAGAAATCTACATAGATCGGAAGAGCGGTTTCAG     |
| chr12 | 56494795  | 56494834  | ERBB3_835  | - | GTGACCTATGCACCAGACGTAATAAACAGAAAATATGCAAGGAAATTTACATGATGAGAGATCGGAAGAGCGGTTTCAG      |
| chr12 | 56495263  | 56495302  | ERBB3_836  | - | GTGACCTATGCACCAGACGTAGAAGAAAGGCTAGGTATGTGAAGAACTTCATGAGGTTAGAGATCGGAAGAGCGGTTTCAG    |
| chr12 | 56495526  | 56495565  | ERBB3_837  | - | GTGACCTATGCACCAGACGTGCAGTGGGCATGATGGGTACAGGGTGGAGTGGGCAACTCTAGATCGGAAGAGCGGTTTCAG    |
| chr9  | 139390473 | 139390512 | NOTCH1_838 | - | GTGACCTATGCACCAGACGTCCACGAGACCCCGGCTTCTTTCCCAAGCCTTCGGGCGTCAGATCGGAAGAGCGGTTTCAG     |
| chr9  | 139393301 | 139393340 | NOTCH1_839 | - | GTGACCTATGCACCAGACGTGGCTGGGATGCCAGGGGAGACGTGAGGGCTGAATCCACAGAGATCGGAAGAGCGGTTTCAG    |
| chr9  | 139393514 | 139393553 | NOTCH1_840 | - | GTGACCTATGCACCAGACGTGGGGGCCAGGGCTGCTCTGTCTGGGGCGGGACCGCCACAGAGATCGGAAGAGCGGTTTCAG    |
| chr9  | 139394954 | 139394993 | NOTCH1_841 | - | GTGACCTATGCACCAGACGTGCTGCTGCTGCTGCCACTGCCCTCCTCAGGGCCGCTGGAGATCGGAAGAGCGGTTTCAG      |
| chr9  | 139396150 | 139396189 | NOTCH1_842 | - | GTGACCTATGCACCAGACGTGCAGCAGCCAGGGCTTCCCTAGCCCGCTGGCCACCTGCCTAGATCGGAAGAGCGGTTTCAG    |
| chr9  | 139396403 | 139396442 | NOTCH1_843 | - | GTGACCTATGCACCAGACGTAGGCTCCCGGGCTCCTGGGCTCCCGGCCACCTGCTGCCGGAGATCGGAAGAGCGGTTTCAG    |
| chr9  | 139396674 | 139396713 | NOTCH1_844 | - | GTGACCTATGCACCAGACGTGCCCGCCCTGCTTCTGGGTCCCGGTGGGAGGTGGACCTAGATCGGAAGAGCGGTTTCAG      |
| chr9  | 139397584 | 139397623 | NOTCH1_845 | - | GTGACCTATGCACCAGACGTCCCCATCCCGGGAACAGGCTCTGCTGCAGGGGTGCCATAGATCGGAAGAGCGGTTTCAG      |
| chr9  | 139399075 | 139399114 | NOTCH1_846 | - | GTGACCTATGCACCAGACGTCCCGCGCCACGGTCAATCCCCGCAACTCTCCTGGGCCAGATCGGAAGAGCGGTTTCAG       |
| chr9  | 139399712 | 139399751 | NOTCH1_847 | - | GTGACCTATGCACCAGACGTGGGGCTCATGGGCTGAGGGAGGACCTGAACTGGATGTGAGATCGGAAGAGCGGTTTCAG      |
| chr9  | 139400929 | 139400968 | NOTCH1_848 | - | GTGACCTATGCACCAGACGTGGGTGCAGGGAGGCAGGGGCCCGCCAGGGGAGACACCTGGAGATCGGAAGAGCGGTTTCAG    |
| chr9  | 139401118 | 139401157 | NOTCH1_849 | - | GTGACCTATGCACCAGACGTGCCAGGCGGGTGGGGCGTGTGGGGCAGCAGGGTGAGCCAGATCGGAAGAGCGGTTTCAG      |
| chr9  | 139401707 | 139401746 | NOTCH1_850 | - | GTGACCTATGCACCAGACGTCTGCACGGAGGGCTGGTGTGGCCATCCATGCCAGGGCAAGATCGGAAGAGCGGTTTCAG      |
| chr9  | 139402357 | 139402396 | NOTCH1_851 | - | GTGACCTATGCACCAGACGTCTCCTAGGGTAAGGGTTGTGGCCGGCACGAGTGTGCCACAGATCGGAAGAGCGGTTTCAG     |
| chr9  | 139402634 | 139402673 | NOTCH1_852 | - | GTGACCTATGCACCAGACGTGTGCCACAGGCTCGGGTCCCAGCCATCAAGTCTCTAGATCGGAAGAGCGGTTTCAG         |
| chr9  | 139403272 | 139403311 | NOTCH1_853 | - | GTGACCTATGCACCAGACGTGCGCCACAGAGGTGCCGGAAGGAGGGGCCCTGGGTGGGTGAGATCGGAAGAGCGGTTTCAG    |
| chr9  | 139404135 | 139404174 | NOTCH1_854 | - | GTGACCTATGCACCAGACGTCTCAGTGAGGCGGTGGAAGGGAACGGGCGGTGCGGGCCAAGATCGGAAGAGCGGTTTCAG     |
| chr9  | 139405055 | 139405094 | NOTCH1_855 | - | GTGACCTATGCACCAGACGTCCCGCGCTCTGGCCTCTCCAGGAAGCTCTCAGGCCTCAGAGATCGGAAGAGCGGTTTCAG     |
| chr9  | 139405554 | 139405593 | NOTCH1_856 | - | GTGACCTATGCACCAGACGTCCAGGGCCCGTGGGGCTGGGATGGGAGGTCAGGATGTCAGATCGGAAGAGCGGTTTCAG      |
| chr9  | 139407462 | 139407462 | NOTCH1_857 | - | GTGACCTATGCACCAGACGTGGTGGGGCTGTGCTGGAGGGGGGGGCTATGTGGGAGAGATCGGAAGAGCGGTTTCAG        |
| chr9  | 139407794 | 139407833 | NOTCH1_858 | - | GTGACCTATGCACCAGACGTTCGCGGTTTCTCAGTGTGCGAGTGGAGGGCCCTCGAGTCTGGGAGATCGGAAGAGCGGTTTCAG |
| chr9  | 139408912 | 139408951 | NOTCH1_859 | - | GTGACCTATGCACCAGACGTGGGCCGATCATGGGACACATCAGTCTAAACCCTGGGAGAGATCGGAAGAGCGGTTTCAG      |
| chr9  | 139409692 | 139409731 | NOTCH1_860 | - | GTGACCTATGCACCAGACGTCTGCACGTGGGGGCTGACTGCACTGTGCTCAGAGGTCAGAGATCGGAAGAGCGGTTTCAG     |
| chr9  | 139409885 | 139409924 | NOTCH1_861 | - | GTGACCTATGCACCAGACGTAGGCGGGTGGCCGGCGGGGGCCAGTGGGCAGGGCGGGCCAGATCGGAAGAGCGGTTTCAG     |
| chr9  | 139410383 | 139410422 | NOTCH1_862 | - | GTGACCTATGCACCAGACGTGCGCCACCACGCGGGAGGGACTGGGACGGGACAGGGCAAGATCGGAAGAGCGGTTTCAG      |
| chr9  | 139411674 | 139411713 | NOTCH1_863 | - | GTGACCTATGCACCAGACGTCCCCCGCCCTCCTCCCGGGTCTGTCACCTCGGCCTCAGATCGGAAGAGCGGTTTCAG        |
| chr9  | 139412154 | 139412193 | NOTCH1_864 | - | GTGACCTATGCACCAGACGTGGGGCAGGGCGGAAAGCCAGTGCAGGCTGGGCAGCTGATCGGAAGAGCGGTTTCAG         |
| chr9  | 139412539 | 139412578 | NOTCH1_865 | - | GTGACCTATGCACCAGACGTGCACAGGGGTGCGGCCAGGTGGGGTGGCAGCCTGGCCAGATCGGAAGAGCGGTTTCAG       |
| chr9  | 139412993 | 139413032 | NOTCH1_866 | - | GTGACCTATGCACCAGACGTTGAGGCCAGGTGGGGCAGGGGGCTCACATGGGCCAGGCAGATCGGAAGAGCGGTTTCAG      |
| chr9  | 139413845 | 139413884 | NOTCH1_867 | - | GTGACCTATGCACCAGACGTGGGTGCGCCGACGGCGGGGTAGCCGGGGCGGGGCTGCTACAGATCGGAAGAGCGGTTTCAG    |
| chr9  | 139417252 | 139417291 | NOTCH1_868 | - | GTGACCTATGCACCAGACGTCCCGTGGCGGGGTGCACGAGCCCTCCCGGCTGCCAGGAGATCGGAAGAGCGGTTTCAG       |
| chr9  | 139418119 | 139418158 | NOTCH1_869 | - | GTGACCTATGCACCAGACGTACCCACAGCTGAGGGTGGGCAGACCCAGCCCGCCAGATCGGAAGAGCGGTTTCAG          |
| chr9  | 139438426 | 139438465 | NOTCH1_870 | - | GTGACCTATGCACCAGACGTCCCTGCGGGACCTGTTCTTGTGAGGGCAGAGCCCTAGATCGGAAGAGCGGTTTCAG         |

|       |           |           |            |   |                                                                                           |
|-------|-----------|-----------|------------|---|-------------------------------------------------------------------------------------------|
| chr9  | 139440128 | 139440167 | NOTCH1_871 | - | GTGACCTATGCACCAGACGTACCCACCCGCGAGCCCCACTTTCCGCGCCCTTTGGAACAGATCGGAAGAGCGGTTTCAG           |
| chr9  | 139399998 | 139400037 | NOTCH1_872 | - | GTGACCTATGCACCAGACGTGCGCGACATCCCCCGCCGCTGATCGAGGAGCGTGCAGAGATCGGAAGAGCGGTTTCAG            |
| chr9  | 139390969 | 139391008 | NOTCH1_873 | - | GTGACCTATGCACCAGACGTGAGAACCTGCAGCCAGCAAACATCCAGCAGCAGCAAAGCCAGATCGGAAGAGCGGTTTCAG         |
| chr9  | 139391465 | 139391504 | NOTCH1_874 | - | GTGACCTATGCACCAGACGTGCCCTCAACCACCTGCTGGGATGCCGACACCCACCTGAGATCGGAAGAGCGGTTTCAG            |
| chr12 | 4383157   | 4383196   | CCND2_875  | - | GTGACCTATGCACCAGACGTGCGGCCCTCTCCCTCTGCTTTCCCGCGCCTGGAAAAAGAGATCGGAAGAGCGGTTTCAG           |
| chr12 | 4385121   | 4385160   | CCND2_876  | - | GTGACCTATGCACCAGACGTAGTGGGAAAGGGTGGGGGGCGGGGGTGGAGAGCATAGCAAGATCGGAAGAGCGGTTTCAG          |
| chr12 | 4387876   | 4387915   | CCND2_877  | - | GTGACCTATGCACCAGACGTAGGCAAGGAAAGAGGAGAACTAAATTCACAGGCTGAGATCGGAAGAGCGGTTTCAG              |
| chr12 | 4397958   | 4397997   | CCND2_878  | - | GTGACCTATGCACCAGACGTGAGAGGAGGAGGAGGTCAGGGCACAGAACGAATTTGGATCCAGATCGGAAGAGCGGTTTCAG        |
| chr12 | 4408976   | 4409015   | CCND2_879  | - | GTGACCTATGCACCAGACGTGGTCCAGACCAGAGTTGTTAGTAAGGAAACAGGACATAGAGATCGGAAGAGCGGTTTCAG          |
| chr8  | 128748790 | 128748829 | MYC_880    | - | GTGACCTATGCACCAGACGTGCTGCAAGGAGAGCCTTTCAGAGAAGCGGGTCTGGCAGCAGATCGGAAGAGCGGTTTCAG          |
| chr8  | 128750444 | 128750483 | MYC_881    | - | GTGACCTATGCACCAGACGTGCACACAAAGCGGGAGGCAGTCTTGAGTTAAAGGGGCTTAGATCGGAAGAGCGGTTTCAG          |
| chr8  | 128752592 | 128752631 | MYC_882    | - | GTGACCTATGCACCAGACGTGGAATAAGAACTACTCTTTAGCAAGGTTACATTAATAATAGATCGGAAGAGCGGTTTCAG          |
| chr8  | 128750830 | 128750869 | MYC_883    | - | GTGACCTATGCACCAGACGTGCTCGCGGTCCAGATGAAACTCTGGTTCACCATGTCTCCAGATGCTCCAGATCGGAAGAGCGGTTTCAG |
| chr8  | 128752873 | 128752912 | MYC_884    | - | GTGACCTATGCACCAGACGTGTCATTTTCGGTGTGTTGCTGATCTGTCTCAGGACTCTGAAGATCGGAAGAGCGGTTTCAG         |
| chr1  | 115251106 | 115251145 | NRAS_885   | - | GTGACCTATGCACCAGACGTATATGGTTTCTTGGCATAATTACAAATCTTAGTATATAGTAGATCGGAAGAGCGGTTTCAG         |
| chr1  | 115252140 | 115252179 | NRAS_886   | - | GTGACCTATGCACCAGACGTGCTTTCAGCATTTGTGCAAGAGTTGTCATCAGTTGATTAAGATCGGAAGAGCGGTTTCAG          |
| chr1  | 115256371 | 115256410 | NRAS_887   | - | GTGACCTATGCACCAGACGTATTATTTCTGAAAGGATGATCTTTGTGTTCTGAATCAGATCGGAAGAGCGGTTTCAG             |
| chr1  | 115258621 | 115258660 | NRAS_888   | - | GTGACCTATGCACCAGACGTGGTGTGGTCCCGCTGACCTGATCTCTCCTCCTGCTGAGATCGGAAGAGCGGTTTCAG             |
| chr19 | 40739729  | 40739768  | AKT2_889   | - | GTGACCTATGCACCAGACGTACGCGAGAGGACGACGCTCGCTGCCATCACCGCTGGGTGAGATCGGAAGAGCGGTTTCAG          |
| chr19 | 40740902  | 40740941  | AKT2_890   | - | GTGACCTATGCACCAGACGTGGGGCCCCCGCGTGGTGTGCTGCCCCAGGGGTGGAGGGAGATCGGAAGAGCGGTTTCAG           |
| chr19 | 40741120  | 40741159  | AKT2_891   | - | GTGACCTATGCACCAGACGTCTGCTTGGCCAGCAGGACCCCTCAGGGACCTGGCCACTCAGATCGGAAGAGCGGTTTCAG          |
| chr19 | 40741747  | 40741786  | AKT2_892   | - | GTGACCTATGCACCAGACGTGCGTCCGGCCCCACCCAGCCAGCCAGCTGCTGCCACTGAGATCGGAAGAGCGGTTTCAG           |
| chr19 | 40742114  | 40742153  | AKT2_893   | - | GTGACCTATGCACCAGACGTGGTGGGGTAGGAACGTTGAGGCCAAGGGTAGGGGAAGATCGGAAGAGCGGTTTCAG              |
| chr19 | 40743826  | 40743865  | AKT2_894   | - | GTGACCTATGCACCAGACGTGGGTGTCGCGCAGGCTGACCTGAGCTGGCATGCACACCACATGAGATCGGAAGAGCGGTTTCAG      |
| chr19 | 40744762  | 40744801  | AKT2_895   | - | GTGACCTATGCACCAGACGTGCTGCCCTTGACTTTGCCCTCTGGGGCCTCCTTCTTAGGGAGATCGGAAGAGCGGTTTCAG         |
| chr19 | 40745902  | 40745941  | AKT2_896   | - | GTGACCTATGCACCAGACGTCTCCCTTCCAGACAGTGTGAGGCCAGCCTTTGGACAGAAGATCGGAAGAGCGGTTTCAG           |
| chr19 | 40747795  | 40747834  | AKT2_897   | - | GTGACCTATGCACCAGACGTGCGGAATTGCGCTCGCGAGCCTCTGTGGGGGCTCGGTTAGATCGGAAGAGCGGTTTCAG           |
| chr19 | 40748391  | 40748430  | AKT2_898   | - | GTGACCTATGCACCAGACGTGGAGCAGGGGTGGGGTGGCCAGCCTGCGGTGCCCCACCCAGATCGGAAGAGCGGTTTCAG          |
| chr19 | 40761015  | 40761054  | AKT2_899   | - | GTGACCTATGCACCAGACGTGCCTGTGTGCTGCCCTGAGAGGGAGCAAGCCTGGTGAGATCGGAAGAGCGGTTTCAG             |
| chr19 | 40762783  | 40762822  | AKT2_900   | - | GTGACCTATGCACCAGACGTGGATGAGTGGTCAAGTGTCTGTTGCTCACAGATGCTGAGATCGGAAGAGCGGTTTCAG            |
| chr19 | 40771079  | 40771118  | AKT2_901   | - | GTGACCTATGCACCAGACGTGCTTTTCCCGCCAGATTTCTTCCACGCTGGCTCCTCAGATCGGAAGAGCGGTTTCAG             |
| chr16 | 3777669   | 3777708   | CREBBP_902 | - | GTGACCTATGCACCAGACGTGCATCACCTTTTCCCTTTCATGTTCTTGGACCTTTTGTACAGATCGGAAGAGCGGTTTCAG         |
| chr16 | 3781143   | 3781182   | CREBBP_903 | - | GTGACCTATGCACCAGACGTCCCCACCCCCACCCCCACAGCGCCGCTGGGGTCTGACGAAGATCGGAAGAGCGGTTTCAG          |
| chr16 | 3781727   | 3781766   | CREBBP_904 | - | GTGACCTATGCACCAGACGTGCTCGGCTGCTGAGGCTGACCCGCTGCCCTGGCCGGGAGGAGGGAAGATCGGAAGAGCGGTTTCAG    |
| chr16 | 3785987   | 3786026   | CREBBP_905 | - | GTGACCTATGCACCAGACGTCTCTGCTGCTCATTGCCATTCAGCTGCTCCGCTGGAGCTGACATCGGAAGAGCGGTTTCAG         |
| chr16 | 3786601   | 3786640   | CREBBP_906 | - | GTGACCTATGCACCAGACGTCTGAAGGAAGGTGGTGGCTTTTGTACAACCTGAGGGGAGGAGATCGGAAGAGCGGTTTCAG         |
| chr16 | 3788510   | 3788549   | CREBBP_907 | - | GTGACCTATGCACCAGACGTATTAATTTTGAACCTAGTAAGAACCCTTTATTTTTAGATCGGAAGAGCGGTTTCAG              |
| chr16 | 3789529   | 3789568   | CREBBP_908 | - | GTGACCTATGCACCAGACGTAGCTCCTCCAGGGCGTGTCACTCAGTGAGCCGTGTTAGGAGATCGGAAGAGCGGTTTCAG          |
| chr16 | 3790350   | 3790389   | CREBBP_909 | - | GTGACCTATGCACCAGACGTCTGCTCTACAGTGTCTGCGAGCAGTCCCACGCCCCGAGATCGGAAGAGCGGTTTCAG             |
| chr16 | 3794845   | 3794884   | CREBBP_910 | - | GTGACCTATGCACCAGACGTGGAAGCTTTCTGTTTCTGGACTGCACATTTAGAAACTTAGATCGGAAGAGCGGTTTCAG           |
| chr16 | 3795228   | 3795267   | CREBBP_911 | - | GTGACCTATGCACCAGACGTCTCCCTGGCCGTGAGGCGAGTTCGCACAGAGCCAGTGGCAGATCGGAAGAGCGGTTTCAG          |
| chr16 | 3799578   | 3799617   | CREBBP_912 | - | GTGACCTATGCACCAGACGTAGCTATTTCTTTTTACTTTTCAGTTTTGGTTTTGAAATCGGAGATCGGAAGAGCGGTTTCAG        |
| chr16 | 3801677   | 3801716   | CREBBP_913 | - | GTGACCTATGCACCAGACGTTCCTGTCTTTCTCTGGGGTGAAGGAGGGTACCTTAAAGATCGGAAGAGCGGTTTCAG             |
| chr16 | 3807239   | 3807278   | CREBBP_914 | - | GTGACCTATGCACCAGACGTAGCAGCATCTGCATTATGCTTAGGGCAAGGCACGTTCAAGATCGGAAGAGCGGTTTCAG           |
| chr16 | 3807760   | 3807799   | CREBBP_915 | - | GTGACCTATGCACCAGACGTAAAGTTTTCCGGAAGTGAATTTCTGGTTAATCCAGCCAGATCGGAAGAGCGGTTTCAG            |
| chr16 | 3808805   | 3808844   | CREBBP_916 | - | GTGACCTATGCACCAGACGTTCATAAAAATAGATTAACCTTTGCTGGTGAATCTTCAAGATCGGAAGAGCGGTTTCAG            |
| chr16 | 3817671   | 3817710   | CREBBP_917 | - | GTGACCTATGCACCAGACGTATTCTATTACCTTATTAAGCATGCTGCTTTTCCACGGTGAAGATCGGAAGAGCGGTTTCAG         |
| chr16 | 3819125   | 3819164   | CREBBP_918 | - | GTGACCTATGCACCAGACGTCTCCCTAGGAATGCATTGACTGCGTATCGCAACTTTACCCAGATCGGAAGAGCGGTTTCAG         |
| chr16 | 3820521   | 3820560   | CREBBP_919 | - | GTGACCTATGCACCAGACGTCTGTCTGCTGTTTTGGGCCAAGACTCTTAGAAGATAAAGATCGGAAGAGCGGTTTCAG            |
| chr16 | 3823702   | 3823741   | CREBBP_920 | - | GTGACCTATGCACCAGACGTCCACTGGGACCGTGGCTCCCTAGGCAAAATAAATCTTTGTGAGATCGGAAGAGCGGTTTCAG        |
| chr16 | 3824520   | 3824559   | CREBBP_921 | - | GTGACCTATGCACCAGACGTCTTCCGCTGCTGCTGCAGATGACCCCTCCTCAGATCGGAAGATCGGAAGAGCGGTTTCAG          |
| chr16 | 3827564   | 3827603   | CREBBP_922 | - | GTGACCTATGCACCAGACGTGTTTGGTGGTGAATCATATTTTAGTTTTACATTCACAGCCAGATCGGAAGAGCGGTTTCAG         |
| chr16 | 3827962   | 3828001   | CREBBP_923 | - | GTGACCTATGCACCAGACGTATTCTTCTACTGCCATCCCTTAGCCTGTTTCTTGGTTTTAGATCGGAAGAGCGGTTTCAG          |
| chr16 | 3828651   | 3828690   | CREBBP_924 | - | GTGACCTATGCACCAGACGTGTTTACCCTGCTCTGGCCTTACAGCATCTGTAGTAGACAAGATCGGAAGAGCGGTTTCAG          |
| chr16 | 3830683   | 3830722   | CREBBP_925 | - | GTGACCTATGCACCAGACGTGTTTGCAGTTTCATAGATGTTTGAATTTTCTGTTAGATCGGAAGAGCGGTTTCAG               |
| chr16 | 3831155   | 3831194   | CREBBP_926 | - | GTGACCTATGCACCAGACGTGTTTCAGATCTGAGTGACAGTCCAACAGGAGCATGGACTGAGATCGGAAGAGCGGTTTCAG         |
| chr16 | 3832635   | 3832674   | CREBBP_927 | - | GTGACCTATGCACCAGACGTGAACTCAACTCTGTTCTTACTTGTCCACATGCAGCAAAAGATCGGAAGAGCGGTTTCAG           |
| chr16 | 3841932   | 3841971   | CREBBP_928 | - | GTGACCTATGCACCAGACGTACGGGGCCAGAGAAGCTTTGGAGATGAGAATAGAAGTTGTTAGATCGGAAGAGCGGTTTCAG        |



|       |           |           |            |   |                                                                                     |
|-------|-----------|-----------|------------|---|-------------------------------------------------------------------------------------|
| chr16 | 3843337   | 3843376   | CREBBP_929 | - | GTGACCTATGCACCAGACGTTTTTTTGGAACTCCTAGTGGTAGAGGTCAGGAAGAATTTGCAGATCGGAAGAGCGGTTTCAG  |
| chr16 | 3860554   | 3860593   | CREBBP_930 | - | GTGACCTATGCACCAGACGCTTTGGCCCTCAGTGTATGGCTCTCCGGTGGGTGCTGTGGAGATCGGAAGAGCGGTTTCAG    |
| chr16 | 3900248   | 3900287   | CREBBP_931 | - | GTGACCTATGCACCAGACGTTGAAGCACTTTCAATACTTCTACCTAACCCGCGGGCTTTCAGATCGGAAGAGCGGTTTCAG   |
| chr16 | 3900604   | 3900643   | CREBBP_932 | - | GTGACCTATGCACCAGACGTGAATCCGCAAGCACAAAAGCAAGTGGGGCTGGCGACTAGCAGATCGGAAGAGCGGTTTCAG   |
| chr16 | 3778100   | 3778139   | CREBBP_933 | - | GTGACCTATGCACCAGACGTGCAGATTTGGGTCCCCAGGCCAGCCGAACCCCATGAGCCCCAGATCGGAAGAGCGGTTTCAG  |
| chr16 | 3778531   | 3778570   | CREBBP_934 | - | GTGACCTATGCACCAGACGTGCGATGGGAGGCCGTGAACCCAGGGGCCAGGCCTTGAACAAGATCGGAAGAGCGGTTTCAG   |
| chr16 | 3778962   | 3779001   | CREBBP_935 | - | GTGACCTATGCACCAGACGTGGCTTGCCTCCCGGCGAGTGGCAGCAGCGGCCCTTCCCGCAAGATCGGAAGAGCGGTTTCAG  |
| chr16 | 3779393   | 3779432   | CREBBP_936 | - | GTGACCTATGCACCAGACGTGAACACCCGCAACGTGCCTCAGCAGAGTCTGCCTTCTCCTAGATCGGAAGAGCGGTTTCAG   |
| chr22 | 29999938  | 29999977  | NF2_937    | - | GTGACCTATGCACCAGACGTTCAGGCCCGGGACCCTCGCGCCCCAGGCCTGCACCTCTGAAGATCGGAAGAGCGGTTTCAG   |
| chr22 | 30032690  | 30032729  | NF2_938    | - | GTGACCTATGCACCAGACGTAAACCAATGGGGAAAGGACACTGTGAGCAAAAATCATTAAATAGATCGGAAGAGCGGTTTCAG |
| chr22 | 30035029  | 30035068  | NF2_939    | - | GTGACCTATGCACCAGACGTGCAGAGCAAAAAGACAAACACACTATATTGGCACTTCTCCAGATCGGAAGAGCGGTTTCAG   |
| chr22 | 30038141  | 30038180  | NF2_940    | - | GTGACCTATGCACCAGACGTCAACAAGGGAGACACTGATACTGTGTAGTGAAGTGAGGTAGATCGGAAGAGCGGTTTCAG    |
| chr22 | 30050596  | 30050635  | NF2_941    | - | GTGACCTATGCACCAGACGTGAAAGGGAGGACAGGCCGATTGAGATTCATAAGATAACTGCAGATCGGAAGAGCGGTTTCAG  |
| chr22 | 30051533  | 30051572  | NF2_942    | - | GTGACCTATGCACCAGACGTATAGAGCAAAAATAAAAAACCTACACATGAAGTAAATTTGGAGATCGGAAGAGCGGTTTCAG  |
| chr22 | 30054128  | 30054167  | NF2_943    | - | GTGACCTATGCACCAGACGTAAACGAAGACACTGTCATTGGAGCTAAGTGAGATGGGTGGAGATCGGAAGAGCGGTTTCAG   |
| chr22 | 30057144  | 30057183  | NF2_944    | - | GTGACCTATGCACCAGACGTAAATAAGAACAGCTACTGTAAGCGCCAGCTGAGGCTCAAAAAGATCGGAAGAGCGGTTTCAG  |
| chr22 | 30060929  | 30060968  | NF2_945    | - | GTGACCTATGCACCAGACGTGAAGCAGAACACAGTTTCAGTCCGACAGCCTGGAATGTTAAGATCGGAAGAGCGGTTTCAG   |
| chr22 | 30064272  | 30064311  | NF2_946    | - | GTGACCTATGCACCAGACGTGAAAGGCAGACAAAAGGTTAATATCCACAAAATTTTCAAGATCGGAAGAGCGGTTTCAG     |
| chr22 | 30067765  | 30067804  | NF2_947    | - | GTGACCTATGCACCAGACGTTGAAGAAAAACAGTCAATGAATCACAGGGCTCGAGACCTAAGATCGGAAGAGCGGTTTCAG   |
| chr22 | 30069208  | 30069247  | NF2_948    | - | GTGACCTATGCACCAGACGTCAAGTCTTAGCTGAAGTGGGATCATGTGCTGTTCTCCAGATCGGAAGAGCGGTTTCAG      |
| chr22 | 30070775  | 30070814  | NF2_949    | - | GTGACCTATGCACCAGACGTAGGATGAGATGTACGCTTACAGAAAGAGGGCAGGTAGCAGAGATCGGAAGAGCGGTTTCAG   |
| chr22 | 30074135  | 30074174  | NF2_950    | - | GTGACCTATGCACCAGACGTGAAATTTTCGATTAGGAGCTTGGGTCTACAAAGCACAGAAAGATCGGAAGAGCGGTTTCAG   |
| chr22 | 30077378  | 30077417  | NF2_951    | - | GTGACCTATGCACCAGACGTGAGGGTATCATGCATCAGGGCTTGGGCAGACAGTGAAGACAGATCGGAAGAGCGGTTTCAG   |
| chr22 | 30078959  | 30078998  | NF2_952    | - | GTGACCTATGCACCAGACGTAAATAAGTAAAGCAAAAACAAAACCTTGTGATATAGATCGGAAGAGCGGTTTCAG         |
| chr22 | 30090691  | 30090730  | NF2_953    | - | GTGACCTATGCACCAGACGTGCAGAGAAGAAGCTGAGAGGGCACAAAGACCTCCGCTCTGTAGATCGGAAGAGCGGTTTCAG  |
| chr1  | 156785572 | 156785611 | NTRK1_954  | - | GTGACCTATGCACCAGACGTGCCACTCACTCCCTTACTGCTCTTAGGCCCTCTGGAAGCAGATCGGAAGAGCGGTTTCAG    |
| chr1  | 156830677 | 156830716 | NTRK1_955  | - | GTGACCTATGCACCAGACGTCCCGCTCGCTCAGGCCGGGCAGCCGTCTGTGCGCTCCCAAGATCGGAAGAGCGGTTTCAG    |
| chr1  | 156834096 | 156834135 | NTRK1_956  | - | GTGACCTATGCACCAGACGTAGCGATGGGAGTCAAGCGGGCTCAGGCCACACTTGAGTTAGATCGGAAGAGCGGTTTCAG    |
| chr1  | 156834470 | 156834509 | NTRK1_957  | - | GTGACCTATGCACCAGACGTGTGCGAGGAGTACCTCCCGCTCAGCTACTTGGGCAGATCGGAAGAGCGGTTTCAG         |
| chr1  | 156836652 | 156836691 | NTRK1_958  | - | GTGACCTATGCACCAGACGTGGAGACAGCAAGACAGACCCCTTGAGTGACCCGACCTCAGATCGGAAGAGCGGTTTCAG     |
| chr1  | 156837846 | 156837885 | NTRK1_959  | - | GTGACCTATGCACCAGACGTTGGGGGACACCAACAGAGTCAAGGAAAGGGCCTGAGGGATAGATCGGAAGAGCGGTTTCAG   |
| chr1  | 156838247 | 156838286 | NTRK1_960  | - | GTGACCTATGCACCAGACGTAGGACGCCCCAGGGCCAAAGGGTGTAGAGCTGGGAGTGGAGATCGGAAGAGCGGTTTCAG    |
| chr1  | 156841365 | 156841404 | NTRK1_961  | - | GTGACCTATGCACCAGACGTAAAGAGAGGGGGGAATAAGAAGGAGCTTTAGCCAGCTTGGAGATCGGAAGAGCGGTTTCAG   |
| chr1  | 156843375 | 156843414 | NTRK1_962  | - | GTGACCTATGCACCAGACGTGAAAGAGCAACAGCAGGAGGTCAAGGGCCGACCTGGAGGGAAAGATCGGAAGAGCGGTTTCAG |
| chr1  | 156844125 | 156844164 | NTRK1_963  | - | GTGACCTATGCACCAGACGTAGGGAGGAGAGAAAGAGTCAAGGAGGAGAGAAAGCAGAGATCGGAAGAGCGGTTTCAG      |
| chr1  | 156844313 | 156844352 | NTRK1_964  | - | GTGACCTATGCACCAGACGTACAGGGCAGGAGGGTGAAGCTTACACACACTGTAGCCTAGATCGGAAGAGCGGTTTCAG     |
| chr1  | 156844648 | 156844687 | NTRK1_965  | - | GTGACCTATGCACCAGACGTACAGGGGTAGTTAGATCCAGGGGCTCCTCTGTACTCTCAAGATCGGAAGAGCGGTTTCAG    |
| chr1  | 156845262 | 156845301 | NTRK1_966  | - | GTGACCTATGCACCAGACGTGACACAGCCGATGGAGGGGTTTGCACACCTTGGCCCTAGATCGGAAGAGCGGTTTCAG      |
| chr1  | 156845822 | 156845861 | NTRK1_967  | - | GTGACCTATGCACCAGACGTTTGCAGGGTCAAGCAGTACGCCCCAGTCTTGGGAGGGCTGGAGATCGGAAGAGCGGTTTCAG  |
| chr1  | 156846142 | 156846181 | NTRK1_968  | - | GTGACCTATGCACCAGACGTGCGGCAGGGACAGGACTGAGTTGGGGCCGAGCCCTCACTAGATCGGAAGAGCGGTTTCAG    |
| chr1  | 156848864 | 156848903 | NTRK1_969  | - | GTGACCTATGCACCAGACGTGAAAAGAGAGGGGATAGGCTGGGAGGATAGAATCCCAAGATCGGAAGAGCGGTTTCAG      |
| chr1  | 156849741 | 156849780 | NTRK1_970  | - | GTGACCTATGCACCAGACGTGCGACACTGCATCAATTCAGGGGCGCCTGGGACAGCCGAGATCGGAAGAGCGGTTTCAG     |
| chr5  | 149495276 | 149495315 | PDGFRB_971 | - | GTGACCTATGCACCAGACGTCTACCCTGCCCTGCCTGAAGCTCCCCCCTGCCAGACAGATCGGAAGAGCGGTTTCAG       |
| chr5  | 149498260 | 149498299 | PDGFRB_972 | - | GTGACCTATGCACCAGACGTGCAGGGTAGGGGTGGAGCACGGAGAGCTCTGGTGCAGAAGAGATCGGAAGAGCGGTTTCAG   |
| chr5  | 149499525 | 149499564 | PDGFRB_973 | - | GTGACCTATGCACCAGACGTTTTCTCCTCCAGCCCTCAGCATCTGGCCTGGTGTCTACCAGATCGGAAGAGCGGTTTCAG    |
| chr5  | 149500401 | 149500440 | PDGFRB_974 | - | GTGACCTATGCACCAGACGTTCCTCGCCCTGCAGGGCAGTACAGTGCCTGTGACCAGATCGGAAGAGCGGTTTCAG        |
| chr5  | 149500717 | 149500756 | PDGFRB_975 | - | GTGACCTATGCACCAGACGTTGTTGGTGGGGCAGAGTGGGGGCTGTGGGGAGGTGGGTCAAGATCGGAAGAGCGGTTTCAG   |
| chr5  | 149501393 | 149501432 | PDGFRB_976 | - | GTGACCTATGCACCAGACGTATAGTGACATAGTACCCACATCCAACAGGCTGATGCTCAGATCGGAAGAGCGGTTTCAG     |
| chr5  | 149502555 | 149502594 | PDGFRB_977 | - | GTGACCTATGCACCAGACGTGGAGGCCAGGGACTGAATCTTTGGGATACCTGAGGACACAGATCGGAAGAGCGGTTTCAG    |
| chr5  | 149503763 | 149503802 | PDGFRB_978 | - | GTGACCTATGCACCAGACGTCACTGCCCCAGAGGCCCTCAGGGAAAGTGCACCACCAAGAGATCGGAAGAGCGGTTTCAG    |
| chr5  | 149504240 | 149504279 | PDGFRB_979 | - | GTGACCTATGCACCAGACGTCTTGGAGCCCTCCACCTTGGGCCCTCACTTCCCTGCCAGATCGGAAGAGCGGTTTCAG      |
| chr5  | 149506033 | 149506072 | PDGFRB_980 | - | GTGACCTATGCACCAGACGTCCCTGCCAGTGGGTGAAGACTGACACATCAATTTTGAATCGGAAGAGCGGTTTCAG        |
| chr5  | 149509270 | 149509309 | PDGFRB_981 | - | GTGACCTATGCACCAGACGTAGCCTCAGTGGCCCTGACGATCCCAATCCCTACCTTAATAGATCGGAAGAGCGGTTTCAG    |
| chr5  | 149510052 | 149510091 | PDGFRB_982 | - | GTGACCTATGCACCAGACGTCTGGGCCTCAGTCTCCAGTGTCCCAAGTGGCTAGAAAAAGATCGGAAGAGCGGTTTCAG     |
| chr5  | 149512263 | 149512302 | PDGFRB_983 | - | GTGACCTATGCACCAGACGTGCTCTCCATCCCATCTTGAAGTATTTTTCTTTCAGAGATCGGAAGAGCGGTTTCAG        |
| chr5  | 149513099 | 149513138 | PDGFRB_984 | - | GTGACCTATGCACCAGACGTTGGGCTCAGCCCAATCCCAATCCTTCAACGCTCCCAACAGATCGGAAGAGCGGTTTCAG     |
| chr5  | 149513394 | 149513433 | PDGFRB_985 | - | GTGACCTATGCACCAGACGTGCCAGGCTCGAGGCTGGAGGGCCAGGAACGGTGGATAGATCGGAAGAGCGGTTTCAG       |
| chr5  | 149515068 | 149515107 | PDGFRB_986 | - | GTGACCTATGCACCAGACGTCCAGCCTGTGTGCCCACTCTTACCCCTTGTCAACTGGAGATCGGAAGAGCGGTTTCAG      |

|       |           |           |               |   |                                                                                      |
|-------|-----------|-----------|---------------|---|--------------------------------------------------------------------------------------|
| chr5  | 149516521 | 149516560 | PDGFRB_987    | - | GTGACCTATGCACCAGACGTGGGAGATAAGGTAGGGGACCCGGGGGCTGCGGAGTGGAAGATCGGAAGAGCGGTTTCAG      |
| chr9  | 133589657 | 133589696 | ABL1_988      | - | GTGACCTATGCACCAGACGTTAGGTACCCCTTTCCAGAAAGGGTTCAAGATCTTCCAGAAGATCGGAAGAGCGGTTTCAG     |
| chr9  | 133729401 | 133729440 | ABL1_989      | - | GTGACCTATGCACCAGACGTAAGGGGGGAACAGAAAAAAGAAAAAGGAAGAGAAAATTGGAGATCGGAAGAGCGGTTTCAG    |
| chr9  | 133730138 | 133730177 | ABL1_990      | - | GTGACCTATGCACCAGACGTAGGAACCAAATCAGACATATCAGCTTTGGAAACCAGCTTCAGATCGGAAGAGCGGTTTCAG    |
| chr9  | 133738100 | 133738139 | ABL1_991      | - | GTGACCTATGCACCAGACGTCAGGGAACAGCCTTCAGCCCACAGAGACAGGCAAGCTCAAAGATCGGAAGAGCGGTTTCAG    |
| chr9  | 133747466 | 133747505 | ABL1_992      | - | GTGACCTATGCACCAGACGTAAAAAACGAAGGTGAAATTTATTCAGGAAGTGCTTTTCAAGATCGGAAGAGCGGTTTCAG     |
| chr9  | 133748197 | 133748236 | ABL1_993      | - | GTGACCTATGCACCAGACGTGACAACCGGACTTCAACAGCTGGCTCCGCTCCCACTGAAGATCGGAAGAGCGGTTTCAG      |
| chr9  | 133750205 | 133750244 | ABL1_994      | - | GTGACCTATGCACCAGACGTAAATGTTACCCATGAGAGCTCCTGGCCAACCTTCCACTAGATCGGAAGAGCGGTTTCAG      |
| chr9  | 133753752 | 133753791 | ABL1_995      | - | GTGACCTATGCACCAGACGTACCGAAAGAGAAAGGCTGTCAAGATGTGTAGCATTTTACAGATCGGAAGAGCGGTTTCAG     |
| chr9  | 133755405 | 133755444 | ABL1_996      | - | GTGACCTATGCACCAGACGTGAAACCCAAGTCAGATCATCCATGAGATCTGGCTAGCAATAGATCGGAAGAGCGGTTTCAG    |
| chr9  | 133755837 | 133755876 | ABL1_997      | - | GTGACCTATGCACCAGACGTTACAGGGGACAGAAACAAAATCCAGCAGCCATCAGTACTGAGATCGGAAGAGCGGTTTCAG    |
| chr9  | 133759735 | 133759774 | ABL1_998      | - | GTGACCTATGCACCAGACGTGGCTAGGCGGCTGTGGTCAGCTGCTGGACTTCTTCCACAGATCGGAAGAGCGGTTTCAG      |
| chr9  | 133760164 | 133760203 | ABL1_999      | - | GTGACCTATGCACCAGACGTAAAGGCACTGCCCTTCCAGCTTCTTCCCTTGTGGGGAGGAGATCGGAAGAGCGGTTTCAG     |
| chr9  | 133760593 | 133760632 | ABL1_1000     | - | GTGACCTATGCACCAGACGTCAACGTGGAGGGAACGGGGGCTGGGCTGATGGGGTCCCCAGATCGGAAGAGCGGTTTCAG     |
| chr11 | 69456032  | 69456071  | CCND1_1001    | - | GTGACCTATGCACCAGACGTCTTCTGGGACGCTGGGAGGGCTGTGGGTCCTGGCTGGGAGATCGGAAGAGCGGTTTCAG      |
| chr11 | 69457749  | 69457788  | CCND1_1002    | - | GTGACCTATGCACCAGACGTACGGGGCCCGTGACCGCCGCGCCAGGTGCGCGCCGCCCCAGATCGGAAGAGCGGTTTCAG     |
| chr11 | 69458550  | 69458589  | CCND1_1003    | - | GTGACCTATGCACCAGACGTAGGGTGAGCGGGCCATCAGGGGAGGTCGGGGCCAGCCCGGGAGATCGGAAGAGCGGTTTCAG   |
| chr11 | 69462712  | 69462751  | CCND1_1004    | - | GTGACCTATGCACCAGACGTAGGAGAGGAGAGGCTGTGAGCAGGGGACCCTCTCAAGATCGGAAGAGCGGTTTCAG         |
| chr11 | 69465836  | 69465875  | CCND1_1005    | - | GTGACCTATGCACCAGACGTGAGGGTGGGGAGAGGTGGGAAGAGGGGCTCCTTAGAAGGGAGATCGGAAGAGCGGTTTCAG    |
| chr7  | 92244404  | 92244443  | CDK6_1006     | - | GTGACCTATGCACCAGACGTGCCGCCTTAAGCTGATCCTGCGGAGAACACCCTTGGTGGCAGATCGGAAGAGCGGTTTCAG    |
| chr7  | 92247336  | 92247375  | CDK6_1007     | - | GTGACCTATGCACCAGACGTCTGATGTCAAGCTCGTCTGCACTGTGCCAGTGAGACACCTAGATCGGAAGAGCGGTTTCAG    |
| chr7  | 92252300  | 92252339  | CDK6_1008     | - | GTGACCTATGCACCAGACGTATTATAATTTTACACCAGTGTCCATAGCATTAAACATTTAGATCGGAAGAGCGGTTTCAG     |
| chr7  | 92300690  | 92300729  | CDK6_1009     | - | GTGACCTATGCACCAGACGTCAATTTTCTACTCTGCTTTTCCCTTGAAAGAGACTGTGGAGATCGGAAGAGCGGTTTCAG     |
| chr7  | 92354890  | 92354929  | CDK6_1010     | - | GTGACCTATGCACCAGACGTGAGTCTGCTCTTTTAACTTATTAACATTTTCCCTATTTTGAAAGTCGGAAGAGCGGTTTCAG   |
| chr7  | 92403960  | 92403999  | CDK6_1011     | - | GTGACCTATGCACCAGACGTTTCATCTTTCATGTCTTATCAGGCAGTCGACTATTATAGTCTAGATCGGAAGAGCGGTTTCAG  |
| chr7  | 92462355  | 92462394  | CDK6_1012     | - | GTGACCTATGCACCAGACGTGAGCTGCGCCCTGCCATCTGGGCTCGCGCGCGGGGAGATCGGAAGAGCGGTTTCAG         |
| chr14 | 102547999 | 102548038 | HSP90AA1_1013 | - | GTGACCTATGCACCAGACGTAGGGATGACTTACTGTTTCAGTACTCTACAATTCCTCTGAAGATCGGAAGAGCGGTTTCAG    |
| chr14 | 102548398 | 102548437 | HSP90AA1_1014 | - | GTGACCTATGCACCAGACGTTACTATGTAATGTAAAAAGAAAATAAACACACAGCTGATCATAGATCGGAAGAGCGGTTTCAG  |
| chr14 | 102549321 | 102549360 | HSP90AA1_1015 | - | GTGACCTATGCACCAGACGTACACTGATTTCTGATCATTGATCTCTAAGTGTCTTCAAGATCGGAAGAGCGGTTTCAG       |
| chr14 | 102549833 | 102549872 | HSP90AA1_1016 | - | GTGACCTATGCACCAGACGTACTGTTTACAGTCAACAGCTCGTCTTACAATCTTGAAGATCGGAAGAGCGGTTTCAG        |
| chr14 | 102550686 | 102550725 | HSP90AA1_1017 | - | GTGACCTATGCACCAGACGTATAGGAAAAATAACTACTGTCACTGATTAAGAAGTACTTAGATCGGAAGAGCGGTTTCAG     |
| chr14 | 102550968 | 102551007 | HSP90AA1_1018 | - | GTGACCTATGCACCAGACGTGATGGGTGCTTCAAGCTTGTCTTAGATTATCATCTTTCTAGATCGGAAGAGCGGTTTCAG     |
| chr14 | 102551585 | 102551624 | HSP90AA1_1019 | - | GTGACCTATGCACCAGACGTATGTAATTCAGAGTGAATTTCTGTCTGTAGGTGATTGGGAGATCGGAAGAGCGGTTTCAG     |
| chr14 | 102552045 | 102552084 | HSP90AA1_1020 | - | GTGACCTATGCACCAGACGTGAACACTGATTTAAGTGAGCGGTGGAAGGGTGGGGTGGAGATCGGAAGAGCGGTTTCAG      |
| chr14 | 102552504 | 102552543 | HSP90AA1_1021 | - | GTGACCTATGCACCAGACGTATTAATCCAGAACTGGATTGGGTTTCAGTGTGAACCTGAGATCGGAAGAGCGGTTTCAG      |
| chr14 | 102568162 | 102568201 | HSP90AA1_1022 | - | GTGACCTATGCACCAGACGTTAAGGTTTAAATTAATCTATCCTAAACATTTCTAGCTAATGAGATCGGAAGAGCGGTTTCAG   |
| chr14 | 102605537 | 102605576 | HSP90AA1_1023 | - | GTGACCTATGCACCAGACGTACTCAAGATTTACGCTTCACTATGTTTTATTTTCAGGCGGGAGATCGGAAGAGCGGTTTCAG   |
| chr19 | 1611656   | 1611695   | TCF3_1024     | - | GTGACCTATGCACCAGACGTTCCGTGGGACGAGCCACCCGCTTTCAGCCCTGTGCTCTGGAGATCGGAAGAGCGGTTTCAG    |
| chr19 | 1612156   | 1612195   | TCF3_1025     | - | GTGACCTATGCACCAGACGTGGCCAGGGGCTGCCACAGCACCCCTCTCCCTTCCCCACACCAGATCGGAAGAGCGGTTTCAG   |
| chr19 | 1615234   | 1615273   | TCF3_1026     | - | GTGACCTATGCACCAGACGTGCGCGGGGCCACACAGCTCCCTGCAGCGCCACCCTCCCTCGAGATCGGAAGAGCGGTTTCAG   |
| chr19 | 1615635   | 1615674   | TCF3_1027     | - | GTGACCTATGCACCAGACGTACCCCTCGGCATCCCCACCCTCACCCATCAGGACACAGATCGGAAGAGCGGTTTCAG        |
| chr19 | 1619060   | 1619099   | TCF3_1028     | - | GTGACCTATGCACCAGACGTGAGCTTGGGACTGTCCGACTCCTGGTTCCAGTTGGGGAAAAGATCGGAAGAGCGGTTTCAG    |
| chr19 | 1619265   | 1619304   | TCF3_1029     | - | GTGACCTATGCACCAGACGTGGCGAGGGTGGAGCTGGGCAAGTGGGCGGGGACCCTCGGCTCCAGATCGGAAGAGCGGTTTCAG |
| chr19 | 1619729   | 1619768   | TCF3_1030     | - | GTGACCTATGCACCAGACGTGCCCGGCCACCCACCCCTTCCCCGACAGAATTTGCAAGGAGATCGGAAGAGCGGTTTCAG     |
| chr19 | 1620917   | 1620956   | TCF3_1031     | - | GTGACCTATGCACCAGACGTGTTTTGGGGGAGGGGAGGCTGAGGCTGTGAGGGTTTGGAGATCGGAAGAGCGGTTTCAG      |
| chr19 | 1621082   | 1621121   | TCF3_1032     | - | GTGACCTATGCACCAGACGTGGCCATGGGGGCTGGCCAGGCAAGTGACCTGAGAGGCCGAGATCGGAAGAGCGGTTTCAG     |
| chr19 | 1621787   | 1621826   | TCF3_1033     | - | GTGACCTATGCACCAGACGTTCCCTGGGATGCGGCCCTCCTCCAGGGGACACTGGGCTCCAAGATCGGAAGAGCGGTTTCAG   |
| chr19 | 1622003   | 1622042   | TCF3_1034     | - | GTGACCTATGCACCAGACGTGGGCAGGGGCGAGGGGTGGGCGGAGGGTGGCAGTCCCAAGATCGGAAGAGCGGTTTCAG      |
| chr19 | 1622262   | 1622301   | TCF3_1035     | - | GTGACCTATGCACCAGACGTGGGCGGGGCTCGCCAGGGACGGTAGGGCAGGGCTGGGGTAGATCGGAAGAGCGGTTTCAG     |
| chr19 | 1623900   | 1623939   | TCF3_1036     | - | GTGACCTATGCACCAGACGTGAGGGGAGAGGGACCCACAGCTCGTCAAGTGGCAGTGCCAGATCGGAAGAGCGGTTTCAG     |
| chr19 | 1625525   | 1625564   | TCF3_1037     | - | GTGACCTATGCACCAGACGTTCTGGCCGGGATCGGGGGCTTCTGGGAGGGAGCCTCAAGATCGGAAGAGCGGTTTCAG       |
| chr19 | 1627308   | 1627347   | TCF3_1038     | - | GTGACCTATGCACCAGACGTGCGGCGGGCTGGGTTGATTTTATTAAACAAATCTGAGATCGGAAGAGCGGTTTCAG         |
| chr19 | 1631987   | 1632026   | TCF3_1039     | - | GTGACCTATGCACCAGACGTGGCCTGGTGCGGTCCCTCTGTGTGCACAGATGTGCAGACAGATCGGAAGAGCGGTTTCAG     |
| chr19 | 1632281   | 1632320   | TCF3_1040     | - | GTGACCTATGCACCAGACGTCCGTGAGGCCTGAGACCTGAGTTTCTGTCCCCAGAGTTAGATCGGAAGAGCGGTTTCAG      |
| chr19 | 1646304   | 1646343   | TCF3_1041     | - | GTGACCTATGCACCAGACGTGCCCTTCTGCCAGCGCTCGTGAGTGAAGGATCAAGGGTAGATCGGAAGAGCGGTTTCAG      |
| chr19 | 1650126   | 1650165   | TCF3_1042     | - | GTGACCTATGCACCAGACGTACCCCGGCCACCCCGACACCCCTTGCCTCCACAGTTAGATCGGAAGAGCGGTTTCAG        |
| chr3  | 41265510  | 41265549  | CTNNB1_1043   | - | GTGACCTATGCACCAGACGTGGATTTTCAAACAGCTTGTATGGTACTTCAAATACCCTAGATCGGAAGAGCGGTTTCAG      |
| chr3  | 41265967  | 41266006  | CTNNB1_1044   | - | GTGACCTATGCACCAGACGTGAAACAGATTAGCATTAGATTGAAATGTTACTTTAAGATCGGAAGAGCGGTTTCAG         |

|       |          |          |             |   |                                                                                       |
|-------|----------|----------|-------------|---|---------------------------------------------------------------------------------------|
| chr3  | 41266395 | 41266434 | CTNNB1_1045 | - | GTGACCTATGCACCAGACGTTTAATTCACACTCACTATCCACAGTTCAGCATTACCTAAGATCGGAAGAGCGGTTTCAG       |
| chr3  | 41266775 | 41266814 | CTNNB1_1046 | - | GTGACCTATGCACCAGACGTTGAAATTCAGAAAACATCGTTAGTTTTCAAGTACTGGTATTGAGATCGGAAGAGCGGTTTCAG   |
| chr3  | 41267101 | 41267140 | CTNNB1_1047 | - | GTGACCTATGCACCAGACGTTGAAAAAGCCTCATCAGAAATATTGTGAGTATACTCTTCTAGATCGGAAGAGCGGTTTCAG     |
| chr3  | 41268649 | 41268688 | CTNNB1_1048 | - | GTGACCTATGCACCAGACGTATATATATATATCTTGTAGTCAAGGAATCTTGATCAGATAGATCGGAAGAGCGGTTTCAG      |
| chr3  | 41274782 | 41274821 | CTNNB1_1049 | - | GTGACCTATGCACCAGACGTTAAAAAGGATATAAGGCCCTAGTTCATTAGCTAGAAAGTGCCTAGATCGGAAGAGCGGTTTCAG  |
| chr3  | 41274970 | 41275009 | CTNNB1_1050 | - | GTGACCTATGCACCAGACGTTAAAAACAGTGGTCAAGTACAAGCACATACTCATCTTGACTAGATCGGAAGAGCGGTTTCAG    |
| chr3  | 41275580 | 41275619 | CTNNB1_1051 | - | GTGACCTATGCACCAGACGTTGAAGGAAGAATGGCATAACAACAAATCAATTTCTAGATCGGAAGAGCGGTTTCAG          |
| chr3  | 41277165 | 41277204 | CTNNB1_1052 | - | GTGACCTATGCACCAGACGTTAAACATGGTTAAACAAACAGGGCATTCTCCTCTGTAAGGTTAGATCGGAAGAGCGGTTTCAG   |
| chr3  | 41277790 | 41277829 | CTNNB1_1053 | - | GTGACCTATGCACCAGACGTTAACAAAAACAACTAATTAATCTAAAGCTAAAACATGAGATCGGAAGAGCGGTTTCAG        |
| chr3  | 41278029 | 41278068 | CTNNB1_1054 | - | GTGACCTATGCACCAGACGTAGGAGAAAAAGGCCCTTGAGGAAAAACTGAGACTTCAATGAGATCGGAAGAGCGGTTTCAG     |
| chr3  | 41279457 | 41279496 | CTNNB1_1055 | - | GTGACCTATGCACCAGACGTATGCACAAAAGGAAGAATAGAAAAGCAAAATGAAAATTAGATCGGAAGAGCGGTTTCAG       |
| chr3  | 41280575 | 41280614 | CTNNB1_1056 | - | GTGACCTATGCACCAGACGTGAGGTTGTCAACAAAATAGGCAAGAAGGAAGGCAAAAAGAGAGATCGGAAGAGCGGTTTCAG    |
| chr8  | 38271096 | 38271135 | FGFR1_1057  | - | GTGACCTATGCACCAGACGTACAGCCCTCCCCAGACTCCACCGTCAAGCTGTAACCCCTCACAGATCGGAAGAGCGGTTTCAG   |
| chr8  | 38271386 | 38271425 | FGFR1_1058  | - | GTGACCTATGCACCAGACGTCCCGTCCAGAGCCAGAGCTCAGGCCCTCCCACTGCGTGCAGATCGGAAGAGCGGTTTCAG      |
| chr8  | 38271620 | 38271659 | FGFR1_1059  | - | GTGACCTATGCACCAGACGTGGAGATGTCGGAGGCCCTGAGCCAGGCCCTGGGGCAAGAGAGATCGGAAGAGCGGTTTCAG     |
| chr8  | 38272027 | 38272066 | FGFR1_1060  | - | GTGACCTATGCACCAGACGTAAATAGCAATTGCCAGGGAGGTGTGGGATAGAGAGCTTCAAGATCGGAAGAGCGGTTTCAG     |
| chr8  | 38272247 | 38272286 | FGFR1_1061  | - | GTGACCTATGCACCAGACGTACAAGGCCCGCCTGTGCTGGTGGTTTCATCTGAGAAGCAAAAGATCGGAAGAGCGGTTTCAG    |
| chr8  | 38273338 | 38273377 | FGFR1_1062  | - | GTGACCTATGCACCAGACGTGAAGGCTCCCTGGTGTAGTCCAGGTTGGGAACAGATCGGAAGAGCGGTTTCAG             |
| chr8  | 38274774 | 38274813 | FGFR1_1063  | - | GTGACCTATGCACCAGACGTGCCAGACTGGCTTTCCCTGCCAGCGGGGAGAAGATCTGAAGATCGGAAGAGCGGTTTCAG      |
| chr8  | 38275338 | 38275377 | FGFR1_1064  | - | GTGACCTATGCACCAGACGTCTTCTGTCTTGCAAAAGAAAATCTTGCCATTCCAAGCAAGATCGGAAGAGCGGTTTCAG       |
| chr8  | 38275696 | 38275735 | FGFR1_1065  | - | GTGACCTATGCACCAGACGTTTTGACTCCCAACTTTTTGAAGGCATTCTTCTGCTTATAGATCGGAAGAGCGGTTTCAG       |
| chr8  | 38277001 | 38277040 | FGFR1_1066  | - | GTGACCTATGCACCAGACGTGGGGGATTTGCACACTCAGCACCCCTCTCTCTGGGCCAGATCGGAAGAGCGGTTTCAG        |
| chr8  | 38279265 | 38279304 | FGFR1_1067  | - | GTGACCTATGCACCAGACGTTAACTTCTCCTCTCGATGTCCTGCCCTGCCACGGGCACAGATCGGAAGAGCGGTTTCAG       |
| chr8  | 38281737 | 38281776 | FGFR1_1068  | - | GTGACCTATGCACCAGACGTGACGACCTACTGGCCCTTGGGGTCACTACACAAGGAAGATCGGAAGAGCGGTTTCAG         |
| chr8  | 38281977 | 38282016 | FGFR1_1069  | - | GTGACCTATGCACCAGACGTACCAGTCTTCGTGGGCCAGTCTACTGGGAAGGAGACCACAGATCGGAAGAGCGGTTTCAG      |
| chr8  | 38283590 | 38283629 | FGFR1_1070  | - | GTGACCTATGCACCAGACGTAGAGGCAGCAGGGAATGAGTTAGTGGGAAGAGCCAGGAGATCGGAAGAGCGGTTTCAG        |
| chr8  | 38285389 | 38285428 | FGFR1_1071  | - | GTGACCTATGCACCAGACGTGTGCATGCGAAAGTTAGAGTAATGGGAACAGGGGAGGCCGAGATCGGAAGAGCGGTTTCAG     |
| chr8  | 38285814 | 38285853 | FGFR1_1072  | - | GTGACCTATGCACCAGACGTGTTTCTTACTGCCCCTTTGGGTTGCGGCATTGGGTTAGATCGGAAGAGCGGTTTCAG         |
| chr8  | 38285820 | 38285859 | FGFR1_1073  | - | GTGACCTATGCACCAGACGTGACACTGTTCTTCTTACTGCCCCTTTGGGTTGCGGCATTGGGTTAGATCGGAAGAGCGGTTTCAG |
| chr8  | 38287150 | 38287189 | FGFR1_1074  | - | GTGACCTATGCACCAGACGTAAAGCCCTGCCCTTCCCTCCCTACACCCACCCCTCCAGAGATCGGAAGAGCGGTTTCAG       |
| chr8  | 38314824 | 38314863 | FGFR1_1075  | - | GTGACCTATGCACCAGACGTGGCTGGGGCAGCCTGGACTCCTGGGCTTGGGAACAGGAAGATCGGAAGAGCGGTTTCAG       |
| chrX  | 15364205 | 15364244 | FIGF_1076   | - | GTGACCTATGCACCAGACGTCAAGTCCCCATCCTGTGATTTTTAACAGCATGCTGCTTAGATCGGAAGAGCGGTTTCAG       |
| chrX  | 15365236 | 15365275 | FIGF_1077   | - | GTGACCTATGCACCAGACGTTGAGTTGTCTTGCCTTTACTCATGACATTTAACGTAGATGAGATCGGAAGAGCGGTTTCAG     |
| chrX  | 15373222 | 15373261 | FIGF_1078   | - | GTGACCTATGCACCAGACGTTGTTTTTTTTTATACTGGATTATGCTTATTTTTGCCTAGATCGGAAGAGCGGTTTCAG        |
| chrX  | 15376075 | 15376114 | FIGF_1079   | - | GTGACCTATGCACCAGACGTGATTCGGCAAGCCTGCGCTCTCTAAAGCCTGATGATAATAGATCGGAAGAGCGGTTTCAG      |
| chrX  | 15381181 | 15381220 | FIGF_1080   | - | GTGACCTATGCACCAGACGTGGATGTGGAGACAAATCTTTCTTTTATTAGATAGTGACAGATCGGAAGAGCGGTTTCAG       |
| chrX  | 15401929 | 15401968 | FIGF_1081   | - | GTGACCTATGCACCAGACGTTCAATTTTTAATGTGATGAAGTCTTTTTATTGGCTCATAAGATCGGAAGAGCGGTTTCAG      |
| chr11 | 532586   | 532625   | HRAS_1082   | - | GTGACCTATGCACCAGACGTGGGGACTCCCAGGGCGGCCACGCCACCGGATGACCCAGATCGGAAGAGCGGTTTCAG         |
| chr11 | 533246   | 533285   | HRAS_1083   | - | GTGACCTATGCACCAGACGTCCCTCGCGCTGTAAGTCTCCCGGACGGCAGGGCAGTGAGGAGATCGGAAGAGCGGTTTCAG     |
| chr11 | 533403   | 533442   | HRAS_1084   | - | GTGACCTATGCACCAGACGTTTCCACCCACAGCTAGCCAGGGACCCGCCCGCCCGCAGATCGGAAGAGCGGTTTCAG         |
| chr11 | 533716   | 533755   | HRAS_1085   | - | GTGACCTATGCACCAGACGTTGAGGCTGGCCCGGACGCCACGCCACAGGTGGGGCCAAGATCGGAAGAGCGGTTTCAG        |
| chr11 | 534162   | 534201   | HRAS_1086   | - | GTGACCTATGCACCAGACGTGCCCGCCTCCAGGTGCCAGCAGCTGCTGCGGGCAGCCAGATCGGAAGAGCGGTTTCAG        |
| chr15 | 88420116 | 88420155 | NTRK3_1087  | - | GTGACCTATGCACCAGACGTTGGTCATGAATTCATACTCTGTTGCCCTCCTCTCCTCCAGATCGGAAGAGCGGTTTCAG       |
| chr15 | 88423451 | 88423490 | NTRK3_1088  | - | GTGACCTATGCACCAGACGTGGTGCAGTGAATCTTATTGGGGGAGGGCTCATAAGAGCAGATCGGAAGAGCGGTTTCAG       |
| chr15 | 88472372 | 88472411 | NTRK3_1089  | - | GTGACCTATGCACCAGACGTTTTCCAGCTGCAGGACTCAGCCACAGCTAGCGCCTTGAGATCGGAAGAGCGGTTTCAG        |
| chr15 | 88476193 | 88476232 | NTRK3_1090  | - | GTGACCTATGCACCAGACGTATTGTCTTCCCTGCTCAGCTGACCCAGTCCACAGCACCAGATCGGAAGAGCGGTTTCAG       |
| chr15 | 88483804 | 88483843 | NTRK3_1091  | - | GTGACCTATGCACCAGACGTGAGGCATGCCGGCACCAGGAGGAGGGCTGGCTGAGGGCCAGATCGGAAGAGCGGTTTCAG      |
| chr15 | 88522526 | 88522565 | NTRK3_1092  | - | GTGACCTATGCACCAGACGTTAAGCCTCCTGTTTTGATGTCACCTTGGTAGGCTGGGCCAGATCGGAAGAGCGGTTTCAG      |
| chr15 | 88524407 | 88524446 | NTRK3_1093  | - | GTGACCTATGCACCAGACGTTCCCTTGTGAGCTTTGTATGAGTAAGATCCCTCCCTAAGATCGGAAGAGCGGTTTCAG        |
| chr15 | 88576038 | 88576077 | NTRK3_1094  | - | GTGACCTATGCACCAGACGTGGATGGAATGCTCTCCCTCCTGGGAGGGGAGGGTGGTTGAGATCGGAAGAGCGGTTTCAG      |
| chr15 | 88669452 | 88669491 | NTRK3_1095  | - | GTGACCTATGCACCAGACGTGTTTTCATTTCAAGGGCCTCATGGGGGAAACATTACTGAGATCGGAAGAGCGGTTTCAG       |
| chr15 | 88670343 | 88670382 | NTRK3_1096  | - | GTGACCTATGCACCAGACGTTTGGTCAAGAGGAGTGTGTGACTGGCATAGTCAATTTAGATCGGAAGAGCGGTTTCAG        |
| chr15 | 88671892 | 88671931 | NTRK3_1097  | - | GTGACCTATGCACCAGACGTTTTACCTGTTGCTTTGAAACTGATTATTCTGATACTATCAGATCGGAAGAGCGGTTTCAG      |
| chr15 | 88678282 | 88678321 | NTRK3_1098  | - | GTGACCTATGCACCAGACGTCGTAGCTGGATCGGAGGTGTATGGATTCTTTTCAAGCTAGATCGGAAGAGCGGTTTCAG       |
| chr15 | 88679080 | 88679119 | NTRK3_1099  | - | GTGACCTATGCACCAGACGTGTTATTGTGGGGATGGCTGTGTGTGAGGGCAACTGGCAAGATCGGAAGAGCGGTTTCAG       |
| chr15 | 88679648 | 88679687 | NTRK3_1100  | - | GTGACCTATGCACCAGACGTTGGGCTTACGCCCATCAGGAGGCTAGGGAGTATCACACAGATCGGAAGAGCGGTTTCAG       |
| chr15 | 88680585 | 88680624 | NTRK3_1101  | - | GTGACCTATGCACCAGACGTTGGCCAGTGGCCAGCTGACTCCAGGAGGATCCCTCAGATCGGAAGAGCGGTTTCAG          |
| chr15 | 88690516 | 88690555 | NTRK3_1102  | - | GTGACCTATGCACCAGACGTTTTTGAAGACTGTCAGGTAAGTGGTGAATGGCTAGATCGGAAGAGCGGTTTCAG            |

|       |           |           |            |   |                                                                                     |
|-------|-----------|-----------|------------|---|-------------------------------------------------------------------------------------|
| chr15 | 88726599  | 88726638  | NTRK3_1103 | - | GTGACCTATGCACCAGACGCTCGGGCTGCAGGGATTGGGGGCACATGGCAGGTACTCTTGAGATCGGAAGAGCGGTTTCAG   |
| chr15 | 88727406  | 88727445  | NTRK3_1104 | - | GTGACCTATGCACCAGACGTCGGGCCACAGAGAGGCCCTTCCCTGTGGAAGGGGTGGATGAGATCGGAAGAGCGGTTTCAG   |
| chr15 | 88799087  | 88799126  | NTRK3_1105 | - | GTGACCTATGCACCAGACGTCGGCCGCTCCCCAGCCTGCCTCCCCCGCTCTGCGTCTCAGATCGGAAGAGCGGTTTCAG     |
| chr11 | 32410554  | 32410593  | WT1_1106   | - | GTGACCTATGCACCAGACGTTCCGGGACCGTTCAGTGTCCCAGGCAGCACAGTGTGTGAAAGATCGGAAGAGCGGTTTCAG   |
| chr11 | 32413468  | 32413507  | WT1_1107   | - | GTGACCTATGCACCAGACGTTTTTCTCACATTTATTTTTCAATTTTTTTAAACTATTAGATCGGAAGAGCGGTTTCAG      |
| chr11 | 32413477  | 32413516  | WT1_1108   | - | GTGACCTATGCACCAGACGTTGCGTAAACTTTCTTCCACATTTATTTTTCAATTTTTTTAGATCGGAAGAGCGGTTTCAG    |
| chr11 | 32414162  | 32414201  | WT1_1109   | - | GTGACCTATGCACCAGACGTTCACTTCTCATTGCTCCAGCTGTGTCCCTTGGCTAGGAGATCGGAAGAGCGGTTTCAG      |
| chr11 | 32417753  | 32417792  | WT1_1110   | - | GTGACCTATGCACCAGACGTCGCTGTCCAGTCTTGGGCAAACATGGTTCAAGAGCTCCTAGATCGGAAGAGCGGTTTCAG    |
| chr11 | 32421444  | 32421483  | WT1_1111   | - | GTGACCTATGCACCAGACGTAGACAGGCCAGCGGGAAGGGGGCCGCACTGCCTCTTCCAGATCGGAAGAGCGGTTTCAG     |
| chr11 | 32437986  | 32438025  | WT1_1112   | - | GTGACCTATGCACCAGACGTAATGCGGAGATGGCAAAGCAAATGGCGTAGGCCCTTGCTGAAGATCGGAAGAGCGGTTTCAG  |
| chr11 | 32439073  | 32439112  | WT1_1113   | - | GTGACCTATGCACCAGACGTCCTATTCCATTGCCTTTCCACAGTAACCTTATACCTGTTTATAGATCGGAAGAGCGGTTTCAG |
| chr11 | 32449452  | 32449491  | WT1_1114   | - | GTGACCTATGCACCAGACGTGCTGGGCTGCGTCTGGGCTTGGACCCCGGAGGGGAAGATCGGAAGAGCGGTTTCAG        |
| chr11 | 32449993  | 32450032  | WT1_1115   | - | GTGACCTATGCACCAGACGTGGAACCAAAGTGGAGTCCCTTCCCTTCTCCGCTGCTATCAGATCGGAAGAGCGGTTTCAG    |
| chr11 | 32456196  | 32456235  | WT1_1116   | - | GTGACCTATGCACCAGACGTCGGGGAGCGCCCCCTACGCGCGGGGCACTGGCGCCAGGGGAAGATCGGAAGAGCGGTTTCAG  |
| chr1  | 22404922  | 22404961  | CDC42_1117 | - | GTGACCTATGCACCAGACGTGTTTTGATCCACTTTAAATATTTCAAATCTGATGATGACAGATCGGAAGAGCGGTTTCAG    |
| chr1  | 22408165  | 22408204  | CDC42_1118 | - | GTGACCTATGCACCAGACGTAAAAATACAACACTGTAGTGTGCAAGGAGAGAGTAAAAAGATCGGAAGAGCGGTTTCAG     |
| chr1  | 22412882  | 22412921  | CDC42_1119 | - | GTGACCTATGCACCAGACGTGAAAAATTTGGAGAGAATTCAGCAACTGAATCTTGGTGTAGATCGGAAGAGCGGTTTCAG    |
| chr1  | 22413112  | 22413151  | CDC42_1120 | - | GTGACCTATGCACCAGACGTGATTTTAAATACACTTTTGTTAATCAACAAGCCCTAAAGATCGGAAGAGCGGTTTCAG      |
| chr1  | 22416386  | 22416425  | CDC42_1121 | - | GTGACCTATGCACCAGACGTGAGGGGAGGAGAGAATAGCAGCCAGGTTAGAGGATTAGATCGGAAGAGCGGTTTCAG       |
| chr1  | 22417871  | 22417910  | CDC42_1122 | - | GTGACCTATGCACCAGACGTGAGAAAGAAAAATGGCGGCTGATTTTCAGTATAATAAGATCGGAAGAGCGGTTTCAG       |
| chr8  | 118811901 | 118811940 | EXT1_1123  | - | GTGACCTATGCACCAGACGTTGAGTGGGGGAGGGGAAGCAAGAAGGGATGGGGGTCAAGCAGATCGGAAGAGCGGTTTCAG   |
| chr8  | 118816911 | 118816950 | EXT1_1124  | - | GTGACCTATGCACCAGACGTAAGAGCCCTTCCCTTGCTTCACTCACTGGTGGTTCAGCAGATCGGAAGAGCGGTTTCAG     |
| chr8  | 118819406 | 118819445 | EXT1_1125  | - | GTGACCTATGCACCAGACGTTGGACATGCTCTACAGACTTTACATAGCTTTTTATATAGATCGGAAGAGCGGTTTCAG      |
| chr8  | 118825061 | 118825100 | EXT1_1126  | - | GTGACCTATGCACCAGACGTGACCTGACGAGCAGCAGGTTGCGCTGTTCCAGGAGCTACCAGATCGGAAGAGCGGTTTCAG   |
| chr8  | 118830624 | 118830663 | EXT1_1127  | - | GTGACCTATGCACCAGACGTAAGGGGACCTATATGTGGAACCACTGTGGAGCCTTGGTTAGATCGGAAGAGCGGTTTCAG    |
| chr8  | 118831865 | 118831904 | EXT1_1128  | - | GTGACCTATGCACCAGACGTAGTTGACAGAGAAGCCCTGCCTGCTCCAGCTCCAGACCAAGATCGGAAGAGCGGTTTCAG    |
| chr8  | 118834654 | 118834693 | EXT1_1129  | - | GTGACCTATGCACCAGACGTTTCCCTCCAGGGAGTTGCCCTTGTTTACCTGAAGATGCAAGATCGGAAGAGCGGTTTCAG    |
| chr8  | 118842419 | 118842458 | EXT1_1130  | - | GTGACCTATGCACCAGACGTCCACTTGGCTCTTGGGCTTGAATAATGGTCCCTTTATACACAGATCGGAAGAGCGGTTTCAG  |
| chr8  | 118847633 | 118847672 | EXT1_1131  | - | GTGACCTATGCACCAGACGTGGCTGTGGCTTCAACACATCAGCAGATATTGCTGCCCAAGATCGGAAGAGCGGTTTCAG     |
| chr8  | 118849297 | 118849336 | EXT1_1132  | - | GTGACCTATGCACCAGACGCTGGAAGCCTTCCCAAGATAGGCTGAGGACCCGAAGCAGAAGATCGGAAGAGCGGTTTCAG    |
| chr8  | 119122274 | 119122313 | EXT1_1133  | - | GTGACCTATGCACCAGACGTGGGCTGGCGTGTCTTTGGGAGTCAGCCTTGGGCTGCTGCCGAGATCGGAAGAGCGGTTTCAG  |
| chr8  | 119122755 | 119122794 | EXT1_1134  | - | GTGACCTATGCACCAGACGTCCAGTTGTACCTCAGTATGTGCAACAATTTGAGATCCAAAAGATCGGAAGAGCGGTTTCAG   |
| chr6  | 108984608 | 108984647 | FOXO3_1135 | - | GTGACCTATGCACCAGACGTAAAAAGAAATACAGAGTATGAACCAGAATGGTCCAAAACAGATCGGAAGAGCGGTTTCAG    |
| chr6  | 108882672 | 108882711 | FOXO3_1136 | - | GTGACCTATGCACCAGACGTCAACCCGGCCGAGTCCCAAGGACCGCCCGGAGCCAGCAGATCGGAAGAGCGGTTTCAG      |
| chr6  | 108985075 | 108985114 | FOXO3_1137 | - | GTGACCTATGCACCAGACGTTGCTTACTGAAAGTACAGCTGGCTGAGCTGCTGTAGAGAGATCGGAAGAGCGGTTTCAG     |
| chr6  | 108985542 | 108985581 | FOXO3_1138 | - | GTGACCTATGCACCAGACGTCGGATCATTGCGAAGCATCACGTTCCGGCGGGAATTCTGGAGATCGGAAGAGCGGTTTCAG   |
| chr1  | 204494597 | 204494636 | MDM4_1139  | - | GTGACCTATGCACCAGACGTAAGAAATGCAGTCTGTTGGTAAACTAAATGAAAAAAGATCGGAAGAGCGGTTTCAG        |
| chr1  | 204495438 | 204495477 | MDM4_1140  | - | GTGACCTATGCACCAGACGTCAAAAATAAATGTGCTATTTACATTTCAAGTAGGTTTCTAGATCGGAAGAGCGGTTTCAG    |
| chr1  | 204499762 | 204499801 | MDM4_1141  | - | GTGACCTATGCACCAGACGTTAAAATACCATGTTGTGATCTGTCCAGCTGCTACCAAAAAGATCGGAAGAGCGGTTTCAG    |
| chr1  | 204501269 | 204501308 | MDM4_1142  | - | GTGACCTATGCACCAGACGTGAGAAGATAAAAATTAACAACCCCAATGCCACTATGAAGATCGGAAGAGCGGTTTCAG      |
| chr1  | 204506508 | 204506547 | MDM4_1143  | - | GTGACCTATGCACCAGACGTGATAAAAACAAAAGGAAAACCTTCCCTGGTAATAACCATTACAGATCGGAAGAGCGGTTTCAG |
| chr1  | 204507287 | 204507326 | MDM4_1144  | - | GTGACCTATGCACCAGACGTGGAAGGTTGCCATCAGTGCAGTAGAAATAACTGAGACCAAGATCGGAAGAGCGGTTTCAG    |
| chr1  | 204511862 | 204511901 | MDM4_1145  | - | GTGACCTATGCACCAGACGTCAAATGAAAAGAATGATAACTATGCACAATACGTAATAACAGATCGGAAGAGCGGTTTCAG   |
| chr1  | 204513613 | 204513652 | MDM4_1146  | - | GTGACCTATGCACCAGACGTAAAAACAACATGAGTTTCTGTATTACAGAGTTTATCAGAAGATCGGAAGAGCGGTTTCAG    |
| chr1  | 204515875 | 204515914 | MDM4_1147  | - | GTGACCTATGCACCAGACGTAAAAACTCTCATTGAATGTTTACTTGTTTTTAGATGAGATCGGAAGAGCGGTTTCAG       |
| chr1  | 204518191 | 204518230 | MDM4_1148  | - | GTGACCTATGCACCAGACGTAAAGTGAAGCAATTAATACTGAGGGGTTAATATGATGATCGGAAGAGCGGTTTCAG        |
| chr1  | 204518476 | 204518515 | MDM4_1149  | - | GTGACCTATGCACCAGACGTTCCACTGAGTTGCAGGGATCAAAAAGTTTGGAGTTTTCTTAGATCGGAAGAGCGGTTTCAG   |
| chr7  | 538151    | 538190    | PDGFA_1150 | - | GTGACCTATGCACCAGACGTCAGCCCTTCTGGGACATGGATGACATGGCGTGTACAAGATCGGAAGAGCGGTTTCAG       |
| chr7  | 540031    | 540070    | PDGFA_1151 | - | GTGACCTATGCACCAGACGTCAGGTAGGACTGTCTGCCGGACACACTGAGTCCCTGCAGGGAGATCGGAAGAGCGGTTTCAG  |
| chr7  | 540703    | 540742    | PDGFA_1152 | - | GTGACCTATGCACCAGACGTGCCCTTCGTCCGATCGGTGTTGGAGAACAGGTTCTCAGAGAGATCGGAAGAGCGGTTTCAG   |
| chr7  | 558526    | 558565    | PDGFA_1153 | - | GTGACCTATGCACCAGACGTCGCCCGCCCGCTCCCTCGCCGGCTCCTCCGGCCACAAGATCGGAAGAGCGGTTTCAG       |
| chr7  | 6012980   | 6013019   | PMS2_1154  | - | GTGACCTATGCACCAGACGTTGATGAAATAAGTTTATGCTCCAGATTTTTATGTTTTAGATCGGAAGAGCGGTTTCAG      |
| chr7  | 6017169   | 6017208   | PMS2_1155  | - | GTGACCTATGCACCAGACGTAAAGCCTGGCTGTCAGCTCAGCTGCTCAAGCTTGCAGTTCAGATCGGAAGAGCGGTTTCAG   |
| chr7  | 6022405   | 6022444   | PMS2_1156  | - | GTGACCTATGCACCAGACGTTTAGTGTTCATTTCCAGACTCCCTCAAATGAAGATCTAGATCGGAAGAGCGGTTTCAG      |
| chr7  | 6029381   | 6029420   | PMS2_1157  | - | GTGACCTATGCACCAGACGTTACAGTGTACAACAGCTTCTAAAGCTTTTAGCTAATGTGAGATCGGAAGAGCGGTTTCAG    |
| chr7  | 6031554   | 6031593   | PMS2_1158  | - | GTGACCTATGCACCAGACGTTTGGCATTTCAGTACAACAGTGTACTAATGCCTCAAAGAAAGATCGGAAGAGCGGTTTCAG   |
| chr7  | 6035115   | 6035154   | PMS2_1159  | - | GTGACCTATGCACCAGACGTTTTTGTGTTGTTGTTGTTTGTGCTTTGACTTTTAAGATCGGAAGAGCGGTTTCAG         |
| chr7  | 6036907   | 6036946   | PMS2_1160  | - | GTGACCTATGCACCAGACGTTGCTGGCAAGAACTACAATTGAACATTTTATCCTGAGAAGATCGGAAGAGCGGTTTCAG     |

|       |          |          |            |   |                                                                                     |
|-------|----------|----------|------------|---|-------------------------------------------------------------------------------------|
| chr7  | 6038689  | 6038728  | PMS2_1161  | - | GTGACCTATGCACCAGACGTCGGGTTACTTCAACGCCTCTTATTGCTCTAGTGATTATAGAGATCGGAAGAGCGGTTTCAG   |
| chr7  | 6042034  | 6042073  | PMS2_1162  | - | GTGACCTATGCACCAGACGTTTAACTCTGGTTTTCAAGAGTATTGGTTAATGCACATGAGAGATCGGAAGAGCGGTTTCAG   |
| chr7  | 6043271  | 6043310  | PMS2_1163  | - | GTGACCTATGCACCAGACGTATTTTTTACTCACTCACTTGACCCCTTAGAGAACTCTCTAGATCGGAAGAGCGGTTTCAG    |
| chr7  | 6043553  | 6043592  | PMS2_1164  | - | GTGACCTATGCACCAGACGTTTTTTTCTAATCTATTATAAAATAATTGGGTCACATGTCTAGATCGGAAGAGCGGTTTCAG   |
| chr7  | 6045473  | 6045512  | PMS2_1165  | - | GTGACCTATGCACCAGACGTGAGAGTTTTAAAGCCACAAGAAATGATCTGTGAATGTTGTTAGATCGGAAGAGCGGTTTCAG  |
| chr7  | 6048578  | 6048617  | PMS2_1166  | - | GTGACCTATGCACCAGACGTCCTCGCAGTCTCCGGTCTCCCTCTCGCGCCCTCTTTGATCGGAAGAGCGGTTTCAG        |
| chr7  | 6026771  | 6026810  | PMS2_1167  | - | GTGACCTATGCACCAGACGTCGCAGGAACATGTGGACTCTCAGGATAAAGCGCTTAAACAGATCGGAAGAGCGGTTTCAG    |
| chr21 | 36171548 | 36171587 | RUNX1_1168 | - | GTGACCTATGCACCAGACGTTGAAAACACATTCTTTGCGAGCTGAGCTGGGGTGGAGGTCAGATCGGAAGAGCGGTTTCAG   |
| chr21 | 36193915 | 36193954 | RUNX1_1169 | - | GTGACCTATGCACCAGACGTAGTCTTCTGTCCATCCCTCTCCCAGCCAGGATAGAGCTAGATCGGAAGAGCGGTTTCAG     |
| chr21 | 36206657 | 36206696 | RUNX1_1170 | - | GTGACCTATGCACCAGACGTGATGGAGCCACTGCCCGCCTCTCCTGCACCTGGGCCACCAGATCGGAAGAGCGGTTTCAG    |
| chr21 | 36231721 | 36231760 | RUNX1_1171 | - | GTGACCTATGCACCAGACGTCCACTTGGGGCTGGTACACCCCTCCAGGCTGGTACACCCCTCAGATCGGAAGAGCGGTTTCAG |
| chr21 | 36252804 | 36252843 | RUNX1_1172 | - | GTGACCTATGCACCAGACGTTGTCAAACCTATGCTTGAACACGTTTCATGGCAACAACAGATCGGAAGAGCGGTTTCAG     |
| chr21 | 36259090 | 36259129 | RUNX1_1173 | - | GTGACCTATGCACCAGACGTGGAGAGGGTGGTGGGAGGACAGGCCGGAGGCCGCGAGGATCGGAAGAGCGGTTTCAG       |
| chr21 | 36265172 | 36265211 | RUNX1_1174 | - | GTGACCTATGCACCAGACGTTTTCCAAGTTATATTTTTAAATAAAGTACACACCTTCATAGAGATCGGAAGAGCGGTTTCAG  |
| chr21 | 36421089 | 36421128 | RUNX1_1175 | - | GTGACCTATGCACCAGACGTGCTGGTCTTGTAAATATCTACTTTTTGCTCAGCTTTGCCTGTAGATCGGAAGAGCGGTTTCAG |
| chr3  | 10183482 | 10183521 | VHL_1176   | - | GTGACCTATGCACCAGACGTATCCAGACCACCCGGCCGGACGCCGCGGATCCGCGGGTAGATCGGAAGAGCGGTTTCAG     |
| chr3  | 10191421 | 10191460 | VHL_1177   | - | GTGACCTATGCACCAGACGTAAACACCACTCAGTGGCAGACTAGGGTCTCAGTACAAGATCGGAAGAGCGGTTTCAG       |
| chr8  | 30915914 | 30915953 | WRN_1178   | - | GTGACCTATGCACCAGACGTTCTTATGTCAGACTCCAAACAAATGCTTTCATGGTATCGGAAGAGCGGTTTCAG          |
| chr8  | 30916619 | 30916658 | WRN_1179   | - | GTGACCTATGCACCAGACGTGTAATTTCAAACAGCCAAAGTTCACATCAAATAACAAGATCGGAAGAGCGGTTTCAG       |
| chr8  | 30922381 | 30922420 | WRN_1180   | - | GTGACCTATGCACCAGACGTTTCTTGTATTTCCATAAGTCTGTCAAGTATGATGGATTAGATCGGAAGAGCGGTTTCAG     |
| chr8  | 30924499 | 30924538 | WRN_1181   | - | GTGACCTATGCACCAGACGTTGAAAAGCAACACAGTAAATCAGTTCCTGTTTTAGGTTAGATCGGAAGAGCGGTTTCAG     |
| chr8  | 30925724 | 30925763 | WRN_1182   | - | GTGACCTATGCACCAGACGTACAGAAAATTTAAAGTATGCTAAAGATCACCGAAATAAGATCGGAAGAGCGGTTTCAG      |
| chr8  | 30933639 | 30933678 | WRN_1183   | - | GTGACCTATGCACCAGACGTAAATAATCAATATTAATTTCAAACCAAAAGCAGAGATAAGATCGGAAGAGCGGTTTCAG     |
| chr8  | 30938333 | 30938372 | WRN_1184   | - | GTGACCTATGCACCAGACGTAAATAAGAAATTAATTTCAACTTCATTTGCAATTAACACTACAGATCGGAAGAGCGGTTTCAG |
| chr8  | 30941165 | 30941204 | WRN_1185   | - | GTGACCTATGCACCAGACGTAGTATTAAGCATTAAATTTCCAATATAATTGACTTCATATCAGATCGGAAGAGCGGTTTCAG  |
| chr8  | 30942632 | 30942671 | WRN_1186   | - | GTGACCTATGCACCAGACGTAAGTATTAAGCATTAAATTTCAAATATAATTGACTTCATATAGATCGGAAGAGCGGTTTCAG  |
| chr8  | 30945242 | 30945281 | WRN_1187   | - | GTGACCTATGCACCAGACGTAAAGAAATCTTAAAGCAAACCACTGACAGTGTCTATAGATCGGAAGAGCGGTTTCAG       |
| chr8  | 30946356 | 30946395 | WRN_1188   | - | GTGACCTATGCACCAGACGTAATAAAATGTGCATTATGTTCAAGTAGAAAAACACCACAAGATCGGAAGAGCGGTTTCAG    |
| chr8  | 30947931 | 30947970 | WRN_1189   | - | GTGACCTATGCACCAGACGTAAAGCAAAAGTATGTTTCTTTATTAATAAGAAACCCCAAGATCGGAAGAGCGGTTTCAG     |
| chr8  | 30949296 | 30949335 | WRN_1190   | - | GTGACCTATGCACCAGACGTAAACAAATAATCTGGCCATGTACACATTAACATATAGATCGGAAGAGCGGTTTCAG        |
| chr8  | 30958315 | 30958354 | WRN_1191   | - | GTGACCTATGCACCAGACGTAGAAAAACATAAAGGAAAAGATAAAGCTCGAAAGGAAAAGATCGGAAGAGCGGTTTCAG     |
| chr8  | 30969081 | 30969120 | WRN_1192   | - | GTGACCTATGCACCAGACGTTAAACTGATATTTAAAGGAAAAGAGCTCATTATTCCAGATCGGAAGAGCGGTTTCAG       |
| chr8  | 30973820 | 30973859 | WRN_1193   | - | GTGACCTATGCACCAGACGTAGAAGAACAAAAGAGCAAACATATATACTTTATACATGCTAGATCGGAAGAGCGGTTTCAG   |
| chr8  | 30977709 | 30977748 | WRN_1194   | - | GTGACCTATGCACCAGACGTATCACAAACAGTTTGACAACATATTTAGCAGAATGAAAAGATCGGAAGAGCGGTTTCAG     |
| chr8  | 30981988 | 30982027 | WRN_1195   | - | GTGACCTATGCACCAGACGTAAACATCACAGGAATATGTAACCTGTATTGGCAACTTTAGATCGGAAGAGCGGTTTCAG     |
| chr8  | 30989831 | 30989870 | WRN_1196   | - | GTGACCTATGCACCAGACGTATAATAACATTTGAAGAAAGCTTAGCAAAGGCATGTATCTAGATCGGAAGAGCGGTTTCAG   |
| chr8  | 30988896 | 30988935 | WRN_1197   | - | GTGACCTATGCACCAGACGTGAATAAAATCAGTATCTAAAAATGCTAATTTAAACATATAAGATCGGAAGAGCGGTTTCAG   |
| chr8  | 30999147 | 30999186 | WRN_1198   | - | GTGACCTATGCACCAGACGTCAAAAAGGATCTTTTAAATGTGGAGTGGGAAAACAAAATTAAGATCGGAAGAGCGGTTTCAG  |
| chr8  | 31001016 | 31001055 | WRN_1199   | - | GTGACCTATGCACCAGACGTACATATAAAGGTCATTTAAAAAAGTTTCAAAAACCTTTTATAGATCGGAAGAGCGGTTTCAG  |
| chr8  | 31004830 | 31004869 | WRN_1200   | - | GTGACCTATGCACCAGACGTAAACAAAGAAACAACACTTTTTAAAGTGTACTTTAAAGATCAGATCGGAAGAGCGGTTTCAG  |
| chr8  | 31012090 | 31012129 | WRN_1201   | - | GTGACCTATGCACCAGACGTTTAAATGATGACCAAAATGATCAATTAATCAATACAATAAAGATCGGAAGAGCGGTTTCAG   |
| chr8  | 31014834 | 31014873 | WRN_1202   | - | GTGACCTATGCACCAGACGTATCAGCAAAGAACCCAGTGAAGTTGAAAAGTGTCCACTCCAGATCGGAAGAGCGGTTTCAG   |
| chr8  | 31024488 | 31024527 | WRN_1203   | - | GTGACCTATGCACCAGACGTTAAAAAATCCATTTCAAATAAATACAGAGAATATTAGATCGGAAGAGCGGTTTCAG        |
| chr8  | 31030461 | 31030500 | WRN_1204   | - | GTGACCTATGCACCAGACGTTAGAAAAGAAAAGAAATCAAATCTTTGACTACTGAGAAGAGATCGGAAGAGCGGTTTCAG    |
| chr2  | 29416040 | 29416079 | ALK_1205   | - | GTGACCTATGCACCAGACGTACTCACTCTCTTCTTCCCTTGGGATCCCTAAGACCGTGGAGATCGGAAGAGCGGTTTCAG    |
| chr2  | 29419586 | 29419625 | ALK_1206   | - | GTGACCTATGCACCAGACGTTTCTCCCTTTGGTCAACTTTACTCTATGAAACAGTCTAGATCGGAAGAGCGGTTTCAG      |
| chr2  | 29420358 | 29420397 | ALK_1207   | - | GTGACCTATGCACCAGACGTTTTAGGAACACTTCTGCTAGTTACTAAGCAGTTTTTCTTTAGATCGGAAGAGCGGTTTCAG   |
| chr2  | 29429987 | 29430026 | ALK_1208   | - | GTGACCTATGCACCAGACGTCATCATCTCCAGGTATCCCTGCAGCCATAAGGTGGTCTAGATCGGAAGAGCGGTTTCAG     |
| chr2  | 29432602 | 29432641 | ALK_1209   | - | GTGACCTATGCACCAGACGTACTGCCTCACCCCTCCGGGCCTGTCTCTTCCACCTCAGCCAGATCGGAAGAGCGGTTTCAG   |
| chr2  | 29436800 | 29436839 | ALK_1210   | - | GTGACCTATGCACCAGACGTGTGACTGTGCTCTTCTGTCTATCTGCTGCTGATCTGTGTAGATCGGAAGAGCGGTTTCAG    |
| chr2  | 29443522 | 29443561 | ALK_1211   | - | GTGACCTATGCACCAGACGTAGCAGTTTGTGCTGAGTTGTGTGCCAAGGACAGGACAGATCGGAAGAGCGGTTTCAG       |
| chr2  | 29445160 | 29445199 | ALK_1212   | - | GTGACCTATGCACCAGACGTAGAGAGACACCCCTCACCCCACTGCCCCCAAGAGATCGGAAGAGCGGTTTCAG           |
| chr2  | 29445333 | 29445372 | ALK_1213   | - | GTGACCTATGCACCAGACGTGCTCACTCTTGAAGCCTGCCCTTGGCTTGGGACTCTGTAGATCGGAAGAGCGGTTTCAG     |
| chr2  | 29446158 | 29446197 | ALK_1214   | - | GTGACCTATGCACCAGACGTTGCTGCCGTCTGGGAGGAGAGGGTGCAGTGTAGGGGCTAGATCGGAAGAGCGGTTTCAG     |
| chr2  | 29448277 | 29448316 | ALK_1215   | - | GTGACCTATGCACCAGACGTAGAGCCCCAGGGACTCCCAAGGGGGCAGGAAGGCACGATAGATCGGAAGAGCGGTTTCAG    |
| chr2  | 29449738 | 29449777 | ALK_1216   | - | GTGACCTATGCACCAGACGTAGGGCCAGGGGAGGCGCCATAGCCTGAGATTTGAGATCGGAAGAGCGGTTTCAG          |
| chr2  | 29450390 | 29450429 | ALK_1217   | - | GTGACCTATGCACCAGACGTTGCCAGCAGCAAGAACTTGTCTAGGTCAGTCTCCAGATCGGAAGAGCGGTTTCAG         |
| chr2  | 29451700 | 29451739 | ALK_1218   | - | GTGACCTATGCACCAGACGTTTCGTGTTCAAGGTGCTACTCCCTCCCTGCTTAGTCTAGATCGGAAGAGCGGTTTCAG      |

|       |           |           |             |   |                                                                                        |
|-------|-----------|-----------|-------------|---|----------------------------------------------------------------------------------------|
| chr2  | 29455120  | 29455159  | ALK_1219    | - | GTGACCTATGCACCAGACGTGCAAGCGTGCCCTCTCCAGAACCTCTCCAGGCCCTCAGAGATCGGAAGAGCGGTTTCAG        |
| chr2  | 29456381  | 29456420  | ALK_1220    | - | GTGACCTATGCACCAGACGTGCTGCCAGATTTCCACCAGGTTCTGTGCATCTGCAATGAGATCGGAAGAGCGGTTTCAG        |
| chr2  | 29462496  | 29462535  | ALK_1221    | - | GTGACCTATGCACCAGACGTAGAGCAGGGGTTTCTCGTCTGCACTCTGTCAGGCCCCGGGAGATCGGAAGAGCGGTTTCAG      |
| chr2  | 29473921  | 29473960  | ALK_1222    | - | GTGACCTATGCACCAGACGTAAGAGGGGGAGGGGAGGGGCAGACCACCCCTCCGAAGAAAGATCGGAAGAGCGGTTTCAG       |
| chr2  | 29497915  | 29497954  | ALK_1223    | - | GTGACCTATGCACCAGACGTAGCTCACAATGTGAGCAGTAACCTCTTGTGTCAAAAGAGATCGGAAGAGCGGTTTCAG         |
| chr2  | 29498218  | 29498257  | ALK_1224    | - | GTGACCTATGCACCAGACGTTCTGACCCAGCACTCTGTCGCCAACCCCATGGCCCATAGATCGGAAGAGCGGTTTCAG         |
| chr2  | 29519704  | 29519743  | ALK_1225    | - | GTGACCTATGCACCAGACGTGTCATCTCCCCAATACCTTCTCCCTATCAGCTAAAATAGATCGGAAGAGCGGTTTCAG         |
| chr2  | 29541120  | 29541159  | ALK_1226    | - | GTGACCTATGCACCAGACGTTTGTCTCTAGTTCTCTAATTTCTCCCTCCACCTCTTGTAGATCGGAAGAGCGGTTTCAG        |
| chr2  | 29543567  | 29543606  | ALK_1227    | - | GTGACCTATGCACCAGACGTTCTCCTGCCTTCTCTGGTGCCATCTTCATGCCACATAGATCGGAAGAGCGGTTTCAG          |
| chr2  | 29551166  | 29551205  | ALK_1228    | - | GTGACCTATGCACCAGACGTGGGGCTGCCACCCTGCCTGAGCCAGCCATGCTCATAAGATCGGAAGAGCGGTTTCAG          |
| chr2  | 29606548  | 29606587  | ALK_1229    | - | GTGACCTATGCACCAGACGTCTGGCTTTCCACGCCTCTTGGTAGCCTATTGTGTTAGATAGATCGGAAGAGCGGTTTCAG       |
| chr2  | 29754731  | 29754770  | ALK_1230    | - | GTGACCTATGCACCAGACGTCCATGTCCAAAATGATTTTATACACAGGTGATTTGGCTAGATCGGAAGAGCGGTTTCAG        |
| chr2  | 29917766  | 29917705  | ALK_1231    | - | GTGACCTATGCACCAGACGTGGCTGCTGGTGTGATGTCTGGTGGGTGAGGTCAGGGCCAGGCTGGAGATCGGAAGAGCGGTTTCAG |
| chr2  | 29940394  | 29940433  | ALK_1232    | - | GTGACCTATGCACCAGACGTGTTAATATTTACTTGAGATACACTGTCACTATCTCATAAAGATCGGAAGAGCGGTTTCAG       |
| chr2  | 30142809  | 30142848  | ALK_1233    | - | GTGACCTATGCACCAGACGTCCCGCTGAGTGTGCCGGGATTTAGTGTTTTATGTCACATAGATCGGAAGAGCGGTTTCAG       |
| chr2  | 29416389  | 29416428  | ALK_1234    | - | GTGACCTATGCACCAGACGTTCCCTGGTTTACAGAGAAAACCCACCAAAAAGAATAATCCTAAGATCGGAAGAGCGGTTTCAG    |
| chr2  | 30143142  | 30143181  | ALK_1235    | - | GTGACCTATGCACCAGACGTAGCCCGCGCAGAGGCCCGCCAGCGCTGTCCAGGGTGTCTGAAGAGATCGGAAGAGCGGTTTCAG   |
| chrX  | 66764939  | 66764978  | AR_1236     | - | GTGACCTATGCACCAGACGTGGCTGAATCTCCACCTACTTCCCTTACCCCGCTCCCTCAGATCGGAAGAGCGGTTTCAG        |
| chrX  | 66788795  | 66788834  | AR_1237     | - | GTGACCTATGCACCAGACGTGACAGGCAATGTACAGGACACTCTGCATTCTTTCCCTGGAGATCGGAAGAGCGGTTTCAG       |
| chrX  | 66863048  | 66863087  | AR_1238     | - | GTGACCTATGCACCAGACGTACAAAAACCAATGCAACACATGTCACTGAATGGCAGAAAAGATCGGAAGAGCGGTTTCAG       |
| chrX  | 66905802  | 66905841  | AR_1239     | - | GTGACCTATGCACCAGACGTAAATACAGAGTTGATAGACCTGATAATGAGTTTCCAGAGAGATCGGAAGAGCGGTTTCAG       |
| chrX  | 66931194  | 66931233  | AR_1240     | - | GTGACCTATGCACCAGACGTGGAAGAGAGACTTGAATTTATCATCAGTGGTCAAAAACACAGATCGGAAGAGCGGTTTCAG      |
| chrX  | 66937270  | 66937309  | AR_1241     | - | GTGACCTATGCACCAGACGTAGAGGCAGAGGCAGTGGTCACTGTTGGTACTGACGGTTGAGATCGGAAGAGCGGTTTCAG       |
| chrX  | 66941625  | 66941664  | AR_1242     | - | GTGACCTATGCACCAGACGTGATACAGAGGAAAAGGAATGGGGAAGTTTACAATAAGATCGGAAGAGCGGTTTCAG           |
| chrX  | 66942619  | 66942658  | AR_1243     | - | GTGACCTATGCACCAGACGTATGAAGACAGAATGGGAGGGGAAGCATGCCACGAAGGAAGATCGGAAGAGCGGTTTCAG        |
| chrX  | 66943478  | 66943517  | AR_1244     | - | GTGACCTATGCACCAGACGTCAATAAGAGGGAGAAAACAGGGTTGACAAGGAGGTGGCCAGATCGGAAGAGCGGTTTCAG       |
| chrX  | 66765343  | 66765382  | AR_1245     | - | GTGACCTATGCACCAGACGTGCAACCTCTCTCGGGGTGGCACTCCAGGGCCGACTGCGGAGATCGGAAGAGCGGTTTCAG       |
| chrX  | 66765747  | 66765786  | AR_1246     | - | GTGACCTATGCACCAGACGTATCCCCCGAAGCTGTTCCCTGGACTCAGATGCTCCAACAGATCGGAAGAGCGGTTTCAG        |
| chrX  | 66766151  | 66766190  | AR_1247     | - | GTGACCTATGCACCAGACGTGCCGCCAGCGCTGCCGTAGCTCCAGCGGGTTCTCCAGCTAGATCGGAAGAGCGGTTTCAG       |
| chr1  | 51435991  | 51436030  | CDKN2C_1248 | - | GTGACCTATGCACCAGACGTCCTGACGATCAGGAAAAGATGAATTAGTCTGTTTTCTTTTATAGATCGGAAGAGCGGTTTCAG    |
| chr1  | 51439515  | 51439554  | CDKN2C_1249 | - | GTGACCTATGCACCAGACGTAGTAAATGGTGAATCCTCAAGTGCATATGCTACAGAAGATCGGAAGAGCGGTTTCAG          |
| chr11 | 125496614 | 125496653 | CHEK1_1250  | - | GTGACCTATGCACCAGACGTAGCACCCTGGCTGTAAAAGGCAGGAATCCAGAAAAGATGTAGATCGGAAGAGCGGTTTCAG      |
| chr11 | 125497452 | 125497491 | CHEK1_1251  | - | GTGACCTATGCACCAGACGTAAAGAGTTTTAATACATCAGAATTCATTTCTTTAAAACAGATCGGAAGAGCGGTTTCAG        |
| chr11 | 125499077 | 125499116 | CHEK1_1252  | - | GTGACCTATGCACCAGACGTTATGAAAGTAAGTTTATTGACTAAATATAATCAGGTAGCAAGATCGGAAGAGCGGTTTCAG      |
| chr11 | 125499236 | 125499275 | CHEK1_1253  | - | GTGACCTATGCACCAGACGTGACAGAGAAAACACACTGAATAATGGTAAATGTAATGTAGATCGGAAGAGCGGTTTCAG        |
| chr11 | 125503008 | 125503047 | CHEK1_1254  | - | GTGACCTATGCACCAGACGTAGAAAAAAGATGACACTGAATAAAAAATGTTTTGCAAATAAGATCGGAAGAGCGGTTTCAG      |
| chr11 | 125505274 | 125505313 | CHEK1_1255  | - | GTGACCTATGCACCAGACGTAGCAAGTCCAGTTTTTAAATGTTCTTATTATAAAGATAGATCGGAAGAGCGGTTTCAG         |
| chr11 | 125507294 | 125507333 | CHEK1_1256  | - | GTGACCTATGCACCAGACGTACATTACGACAACATTCACGAAAGAATCATGTTAGAGAAGAGATCGGAAGAGCGGTTTCAG      |
| chr11 | 125513637 | 125513676 | CHEK1_1257  | - | GTGACCTATGCACCAGACGTAACAAATACAAATGCTTCAAGTCTTCTATGCAAGATGAGATCGGAAGAGCGGTTTCAG         |
| chr11 | 125513936 | 125513975 | CHEK1_1258  | - | GTGACCTATGCACCAGACGTAAGACAGAAGAAAACATACATTTAATAAAAAATCTATAGATCGGAAGAGCGGTTTCAG         |
| chr11 | 125514357 | 125514396 | CHEK1_1259  | - | GTGACCTATGCACCAGACGTAACAGAAGACAAATGAATAAAATCCATTAGGACTAAAGACAAGATCGGAAGAGCGGTTTCAG     |
| chr22 | 29083835  | 29083874  | CHEK2_1260  | - | GTGACCTATGCACCAGACGTTTGAACACGAAAGAAATGTACCTTCTTCACTCTGTCATCAGATCGGAAGAGCGGTTTCAG       |
| chr22 | 29085073  | 29085112  | CHEK2_1261  | - | GTGACCTATGCACCAGACGTTCCCTGATGATCAATAATGTAGTCTGGGCTTAAGGAGCTGAGATCGGAAGAGCGGTTTCAG      |
| chr22 | 29089970  | 29090009  | CHEK2_1262  | - | GTGACCTATGCACCAGACGTGCAAGTGCCTGCTAGCATAAAATACATGGGAAGCCCTGCTAGATCGGAAGAGCGGTTTCAG      |
| chr22 | 29091065  | 29091104  | CHEK2_1263  | - | GTGACCTATGCACCAGACGTGAAAGGGTTAAGAATTTGTGGTATGCTAAAATGTGTATGTAGATCGGAAGAGCGGTTTCAG      |
| chr22 | 29091648  | 29091687  | CHEK2_1264  | - | GTGACCTATGCACCAGACGTTTTTCTGCTGACAGACTGGTAGGAGGTGATTAGATGAAGATCGGAAGAGCGGTTTCAG         |
| chr22 | 29092839  | 29092878  | CHEK2_1265  | - | GTGACCTATGCACCAGACGTGGCATTCTGTATGTGGCTATTCTGTAGATTCTTGTTCAGAGATCGGAAGAGCGGTTTCAG       |
| chr22 | 29095776  | 29095815  | CHEK2_1266  | - | GTGACCTATGCACCAGACGTCCCTCAATTTCTTTGACAGCTGCCTTTCTTTAGTTGAATAGATCGGAAGAGCGGTTTCAG       |
| chr22 | 29099443  | 29099482  | CHEK2_1267  | - | GTGACCTATGCACCAGACGTAACCTTTTTAAAATTTCTGTTTTCCATTCAAATGCTTTATAAGATCGGAAGAGCGGTTTCAG     |
| chr22 | 29105944  | 29105983  | CHEK2_1268  | - | GTGACCTATGCACCAGACGTTTATAGACTCATACTTAGATTTATCTATCTCAAATATGAGATCGGAAGAGCGGTTTCAG        |
| chr22 | 29107847  | 29107886  | CHEK2_1269  | - | GTGACCTATGCACCAGACGTATAAAGGCTGATCACTTTTTATTAACACGCTTCATAACAGATCGGAAGAGCGGTTTCAG        |
| chr22 | 29115333  | 29115372  | CHEK2_1270  | - | GTGACCTATGCACCAGACGTTTCTTATATAAATGACTCACTTAATTTTTTCACTATACATTTGAGATCGGAAGAGCGGTTTCAG   |
| chr22 | 29120915  | 29120954  | CHEK2_1271  | - | GTGACCTATGCACCAGACGTTATCTTATGGTTACTGGAATTTTTTTTTTCACTCTCTCAAGATCGGAAGAGCGGTTTCAG       |
| chr22 | 29121181  | 29121220  | CHEK2_1272  | - | GTGACCTATGCACCAGACGTAATACCCATGTATCTAGGAGAGCTGGTAATTTGGTCATTGAGATCGGAAGAGCGGTTTCAG      |
| chr22 | 29130341  | 29130380  | CHEK2_1273  | - | GTGACCTATGCACCAGACGTTTGTGTATAGTATCACGTTTTGTTCAGAAAACACTTACAGATCGGAAGAGCGGTTTCAG        |
| chr13 | 103498567 | 103498606 | ERCC5_1274  | - | GTGACCTATGCACCAGACGTGCTCCTAAGAGCCGACCCGCAACTCTACTCTAATTTAGATCGGAAGAGCGGTTTCAG          |
| chr13 | 103504418 | 103504457 | ERCC5_1275  | - | GTGACCTATGCACCAGACGTTGTTAATGGAAAACACTCCCGGATTTTTCTCTCATCCTCAGATCGGAAGAGCGGTTTCAG       |
| chr13 | 103506057 | 103506096 | ERCC5_1276  | - | GTGACCTATGCACCAGACGTAAGAGATGAAGATCTCACTTCAGGATATTAGACCACTAGAGATCGGAAGAGCGGTTTCAG       |

|       |           |           |            |   |                                                                                      |
|-------|-----------|-----------|------------|---|--------------------------------------------------------------------------------------|
| chr13 | 103506588 | 103506627 | ERCC5_1277 | - | GTGACCTATGCACCAGACGTACAAAATCTTTAAACAGATTATGCAGACCCCTGCTCAGGATAGATCGGAAGAGCGGTTTCAG   |
| chr13 | 103508352 | 103508391 | ERCC5_1278 | - | GTGACCTATGCACCAGACGTAAACATACATCTTTACGATATCTATGATTTTTAAGGACCCCTTAGATCGGAAGAGCGGTTTCAG |
| chr13 | 103510575 | 103510614 | ERCC5_1279 | - | GTGACCTATGCACCAGACGTAAATACACAGCACCATGAAATTTACATTTACATACCTTAGAGATCGGAAGAGCGGTTTCAG    |
| chr13 | 103513807 | 103513846 | ERCC5_1280 | - | GTGACCTATGCACCAGACGTAAATAAAACAAAATAAATTTACTGTTTTATATTAATACAGATAGATCGGAAGAGCGGTTTCAG  |
| chr13 | 103514330 | 103514369 | ERCC5_1281 | - | GTGACCTATGCACCAGACGTATTAACACACTTCTACCATTTCAGTTTTACAGTGTGACAAAGATCGGAAGAGCGGTTTCAG    |
| chr13 | 103517967 | 103518006 | ERCC5_1282 | - | GTGACCTATGCACCAGACGTATTAAGAGTCACTTCACTACAATCAAACATTAATAGATCGGAAGAGCGGTTTCAG          |
| chr13 | 103518562 | 103518601 | ERCC5_1283 | - | GTGACCTATGCACCAGACGTTTTTTCACTTTATAGTTTATATTAATAATCCAATGAGTAGATCGGAAGAGCGGTTTCAG      |
| chr13 | 103518932 | 103518971 | ERCC5_1284 | - | GTGACCTATGCACCAGACGTAGGGGTACACAGTGACGCCAGGGAAGGGCACCGCCAGGCAGATCGGAAGAGCGGTTTCAG     |
| chr13 | 103524498 | 103524537 | ERCC5_1285 | - | GTGACCTATGCACCAGACGTAAAGAAACAATTACTTACACAGCAATGAGACATTATAGTTAGATCGGAAGAGCGGTTTCAG    |
| chr13 | 103525559 | 103525598 | ERCC5_1286 | - | GTGACCTATGCACCAGACGTAAAGACTTATAAATATTTTGAAGATATTAACAAGTGAAGATCGGAAGAGCGGTTTCAG       |
| chr13 | 103527607 | 103527646 | ERCC5_1287 | - | GTGACCTATGCACCAGACGTAAACAAAAGAATAATAATAATAATACAGACAAGTAAGTCAAAGATCGGAAGAGCGGTTTCAG   |
| chr13 | 103527905 | 103527944 | ERCC5_1288 | - | GTGACCTATGCACCAGACGTGCATGTATCTTTCCCTTTAGAATCTGAAAGCCTCTTTCTTAGATCGGAAGAGCGGTTTCAG    |
| chr13 | 103514688 | 103514727 | ERCC5_1289 | - | GTGACCTATGCACCAGACGTGCACATCATCCCCAGCACACAGCTTTTACATCTTCGTCATCAGATCGGAAGAGCGGTTTCAG   |
| chr13 | 103515046 | 103515085 | ERCC5_1290 | - | GTGACCTATGCACCAGACGTCAAGTTGGAGATGCCGGTGTGAGTTCCCTTCCATTCCGGGAAGATCGGAAGAGCGGTTTCAG   |
| chr10 | 90750584  | 90750623  | FAS_1291   | - | GTGACCTATGCACCAGACGTCAATCCTCCGAAGTGAAGAGCTTCCCCAACTCCGTAAGTACTGAGATCGGAAGAGCGGTTTCAG |
| chr10 | 90762736  | 90762775  | FAS_1292   | - | GTGACCTATGCACCAGACGTAAAGCATGAAGAGAATTTATTGATTTCTGAAGTAAGCAAAGATCGGAAGAGCGGTTTCAG     |
| chr10 | 90767407  | 90767446  | FAS_1293   | - | GTGACCTATGCACCAGACGTAAAAAGGAGCAAGTGTGTTGAACAGGACACGGGCAGGTAAGAGATCGGAAGAGCGGTTTCAG   |
| chr10 | 90768596  | 90768635  | FAS_1294   | - | GTGACCTATGCACCAGACGTGAAATTTGGAAACTATTAGTTAGCGGCTAATATAAGCAGATCGGAAGAGCGGTTTCAG       |
| chr10 | 90770246  | 90770285  | FAS_1295   | - | GTGACCTATGCACCAGACGTAAATACAGGAGAAATCAAAGCCTGCGAGAATAATTCTAGATCGGAAGAGCGGTTTCAG       |
| chr10 | 90770460  | 90770499  | FAS_1296   | - | GTGACCTATGCACCAGACGTGAACATTGGACATTTTATATGAAAATAAGCAATCTTAAAGATCGGAAGAGCGGTTTCAG      |
| chr10 | 90771706  | 90771745  | FAS_1297   | - | GTGACCTATGCACCAGACGTAAAGAAATTTTATCAACTCAGGTCCTCAGCCTTGTAAGATGAGATCGGAAGAGCGGTTTCAG   |
| chr10 | 90773050  | 90773089  | FAS_1298   | - | GTGACCTATGCACCAGACGTAAAAATGGAAGCAGAGAAAGACAAATAAAAAATATATCTTTAGATCGGAAGAGCGGTTTCAG   |
| chr10 | 90773826  | 90773865  | FAS_1299   | - | GTGACCTATGCACCAGACGTGAAATAGTCTGAAAATTTGTTTTCTAAATGAAATCCCAGATCGGAAGAGCGGTTTCAG       |
| chr10 | 123239321 | 123239360 | FGFR2_1300 | - | GTGACCTATGCACCAGACGTCTGCCTGTCCCCAAACAGGACAGCACTGGGAACCTAGCTAAGATCGGAAGAGCGGTTTCAG    |
| chr10 | 123243162 | 123243201 | FGFR2_1301 | - | GTGACCTATGCACCAGACGTCTTCTAGAAAGCCCTTGCTCTTGGTTGTCTTGTGAGACAAGATCGGAAGAGCGGTTTCAG     |
| chr10 | 123244859 | 123244898 | FGFR2_1302 | - | GTGACCTATGCACCAGACGTGTTGTCTTCTGCGGGTCCCCAGTGACCTGCCACACCAAGATCGGAAGAGCGGTTTCAG       |
| chr10 | 123246818 | 123246857 | FGFR2_1303 | - | GTGACCTATGCACCAGACGTCTCTTTCTCTGGCTTTTTCTGGGCTTGAGCTGCAAAAAAGATCGGAAGAGCGGTTTCAG      |
| chr10 | 123247455 | 123247494 | FGFR2_1304 | - | GTGACCTATGCACCAGACGTGGCAGTAACACAGTGGGCAGGGGGGGGTGAGGCTCAGAAGATCGGAAGAGCGGTTTCAG      |
| chr10 | 123255996 | 123256035 | FGFR2_1305 | - | GTGACCTATGCACCAGACGTACACTTACTTGCTGGTGGTGGAACTCAAATGTCAGATCGGAAGAGCGGTTTCAG           |
| chr10 | 123257959 | 123257998 | FGFR2_1306 | - | GTGACCTATGCACCAGACGTGGAATAACTGCATTTCGCCAAATACTCTGCAGTTTGTATGAGATCGGAAGAGCGGTTTCAG    |
| chr10 | 123260290 | 123260329 | FGFR2_1307 | - | GTGACCTATGCACCAGACGTAGGCCGGGAGGCTCGGGGAGGGGCTGGTGGAGAGTCTTATAGATCGGAAGAGCGGTTTCAG    |
| chr10 | 123263254 | 123263293 | FGFR2_1308 | - | GTGACCTATGCACCAGACGTCTCTTGCCATGTCCCAGGATGGAGACTCAGCTATAAATGAGATCGGAAGAGCGGTTTCAG     |
| chr10 | 123274581 | 123274620 | FGFR2_1309 | - | GTGACCTATGCACCAGACGTAAAGAGTTTAAAGAAATTTACTCTCCCCATGACCCAGCAGATCGGAAGAGCGGTTTCAG      |
| chr10 | 123274587 | 123274626 | FGFR2_1310 | - | GTGACCTATGCACCAGACGTGTAGATAAAGAGTTTAAAGAAATTTACTCTCCCCATGAAAGATCGGAAGAGCGGTTTCAG     |
| chr10 | 123276783 | 123276822 | FGFR2_1311 | - | GTGACCTATGCACCAGACGTCTCTTTCTGTTCTGGGTTTTTTCCCTTCTTGGTGTACTAGATCGGAAGAGCGGTTTCAG      |
| chr10 | 123278146 | 123278185 | FGFR2_1312 | - | GTGACCTATGCACCAGACGTCTTTCATTTTTGTCTTTTTTAAAAAGAAAGCTGGATATAGATCGGAAGAGCGGTTTCAG      |
| chr10 | 123279443 | 123279482 | FGFR2_1313 | - | GTGACCTATGCACCAGACGTCTGAATCTAAAGGTACCCACAACCTGGGGTCTCTTTCATGAGATCGGAAGAGCGGTTTCAG    |
| chr10 | 123298056 | 123298095 | FGFR2_1314 | - | GTGACCTATGCACCAGACGTCTCTCTCTGTTGGCAGGCTGCATACCAGCCATTCTTGCTAGATCGGAAGAGCGGTTTCAG     |
| chr10 | 123323966 | 123324005 | FGFR2_1315 | - | GTGACCTATGCACCAGACGTGCCCGCTCCGATGGTCCCCGAGAGAGGAGCATGGAGGGAAGATCGGAAGAGCGGTTTCAG     |
| chr10 | 123324902 | 123324941 | FGFR2_1316 | - | GTGACCTATGCACCAGACGTCCGCCAGCATGCTCTCTCTCTGTAGCCATTACATAGATCGGAAGAGCGGTTTCAG          |
| chr10 | 123353173 | 123353212 | FGFR2_1317 | - | GTGACCTATGCACCAGACGTAAATTTCACTTTTCACTTTTGGATTTTGGATTTGTCTGGGAGATCGGAAGAGCGGTTTCAG    |
| chr1  | 32757721  | 32757760  | HDAC1_1318 | - | GTGACCTATGCACCAGACGTCCCGTCCCTACCCTCAGTCCGTCGCTCCGCTCCGCCAGATCGGAAGAGCGGTTTCAG        |
| chr1  | 32768172  | 32768211  | HDAC1_1319 | - | GTGACCTATGCACCAGACGTGAGAGTGACAGCTTCACTAACACAGTTAGGCATACACTACAGATCGGAAGAGCGGTTTCAG    |
| chr1  | 32782216  | 32782255  | HDAC1_1320 | - | GTGACCTATGCACCAGACGTGAAGGGGAGAAGGGCAAGTTATTTTTGACCACGGCCAGTCAGATCGGAAGAGCGGTTTCAG    |
| chr1  | 32790030  | 32790069  | HDAC1_1321 | - | GTGACCTATGCACCAGACGTATAAGCAAAAAGTTAGTTTTCCACAATTTCCCTTTAGTTTACAGATCGGAAGAGCGGTTTCAG  |
| chr1  | 32792490  | 32792529  | HDAC1_1322 | - | GTGACCTATGCACCAGACGTGAAAAGAGAACAATAGCCCTGTACTAACACTCTCCCAGATCGGAAGAGCGGTTTCAG        |
| chr1  | 32793087  | 32793126  | HDAC1_1323 | - | GTGACCTATGCACCAGACGTAAAGGGGTACAGGGTCTGGGGGCTCTTTGGGATGGGACGAGATCGGAAGAGCGGTTTCAG     |
| chr1  | 32794619  | 32794658  | HDAC1_1324 | - | GTGACCTATGCACCAGACGTAGGCCATTAAGTAAAAGTAAAGGATGAAGCTTGAAGGAAAGATCGGAAGAGCGGTTTCAG     |
| chr1  | 32796129  | 32796168  | HDAC1_1325 | - | GTGACCTATGCACCAGACGTACATCTGGTCAACCAACCTCAAGAAAGCAATACGAGGAGATCGGAAGAGCGGTTTCAG       |
| chr1  | 32796319  | 32796358  | HDAC1_1326 | - | GTGACCTATGCACCAGACGTAGAAGGGGTGCTGAGTTACAGGAGCACAAGCAGGACCCAGATCGGAAGAGCGGTTTCAG      |
| chr1  | 32797025  | 32797064  | HDAC1_1327 | - | GTGACCTATGCACCAGACGTGAGGAGAGAAGACCGTCAAGAGACTGGCCACCCAGCCATGATCGGAAGAGCGGTTTCAG      |
| chr1  | 32797227  | 32797266  | HDAC1_1328 | - | GTGACCTATGCACCAGACGTGGGAGAGATAGCAGGGCTGCTGCTCAGGGACAACAAAGATCGGAAGAGCGGTTTCAG        |
| chr1  | 32797641  | 32797680  | HDAC1_1329 | - | GTGACCTATGCACCAGACGTGTTGGAAAGCATGGGTGAGAGGGCAGGGGGTCTGATTTAAGATCGGAAGAGCGGTTTCAG     |
| chr1  | 32798252  | 32798291  | HDAC1_1330 | - | GTGACCTATGCACCAGACGTAGAGTACAGGGATGGCCAAGGGCAGCACCTCTGGGAAGACAGATCGGAAGAGCGGTTTCAG    |
| chr1  | 32798568  | 32798607  | HDAC1_1331 | - | GTGACCTATGCACCAGACGTAGCAGAGACTGGCATGAGATGACCCAGCCAGAGCCTCAGAGATCGGAAGAGCGGTTTCAG     |
| chr4  | 55946058  | 55946097  | KDR_1332   | - | GTGACCTATGCACCAGACGTCCACACCCCAACTCTGGACATCACATGAGAGGTGCTGCAGATCGGAAGAGCGGTTTCAG      |
| chr4  | 55948073  | 55948112  | KDR_1333   | - | GTGACCTATGCACCAGACGTGCCATATTAATAAAGCAAATTTCAATGAAATTTTTGGAAGATCGGAAGAGCGGTTTCAG      |
| chr4  | 55948653  | 55948692  | KDR_1334   | - | GTGACCTATGCACCAGACGTCTTTTAAAAATAGTCTTGAATAATAACAAGGATGAAACAGATCGGAAGAGCGGTTTCAG      |

|      |           |           |            |   |                                                                                     |
|------|-----------|-----------|------------|---|-------------------------------------------------------------------------------------|
| chr4 | 55953724  | 55953763  | KDR_1335   | - | GTGACCTATGCACCAGACGTTGGCCTAACATCCCCCGGGGGAGGGTGACTTCAAGGCCATAGATCGGAAGAGCGGTTTCAG   |
| chr4 | 55954985  | 55955024  | KDR_1336   | - | GTGACCTATGCACCAGACGTTCCATCCAAGAAGCACCTACAAAGAGTACTTAGATGTCAAAGATCGGAAGAGCGGTTTCAG   |
| chr4 | 55955491  | 55955530  | KDR_1337   | - | GTGACCTATGCACCAGACGTAAGAAGTATTCTGTGTTCTCTTTCTTTGCTCGCAAATTCAGATCGGAAGAGCGGTTTCAG    |
| chr4 | 55955808  | 55955847  | KDR_1338   | - | GTGACCTATGCACCAGACGTTCTTTTTGTCCTTCCATCCAGACTCCAAGAGGAAGACAAAGATCGGAAGAGCGGTTTCAG    |
| chr4 | 55956073  | 55956112  | KDR_1339   | - | GTGACCTATGCACCAGACGTAATATGAACCCAGTGCTTGGTTAAGTAACAGAATTAACAGATCGGAAGAGCGGTTTCAG     |
| chr4 | 55958734  | 55958773  | KDR_1340   | - | GTGACCTATGCACCAGACGTTTGAGGGGAAATCAGCTATCTTTTCAGATCACAGGTTTGGAGATCGGAAGAGCGGTTTCAG   |
| chr4 | 55960919  | 55960958  | KDR_1341   | - | GTGACCTATGCACCAGACGTGGCTTCCGTGCATGCTATGGCATGCTCTTGTACAGACAGAAGATCGGAAGAGCGGTTTCAG   |
| chr4 | 55961694  | 55961733  | KDR_1342   | - | GTGACCTATGCACCAGACGTTCCATACTGCTGCTGGCCATGTTATAAAATGAAGGGAAAAGATCGGAAGAGCGGTTTCAG    |
| chr4 | 55962346  | 55962385  | KDR_1343   | - | GTGACCTATGCACCAGACGTGGGGTGGTTTTGGTCACCAATTTAAACATGCCTCTCTGAGATCGGAAGAGCGGTTTCAG     |
| chr4 | 55963779  | 55963818  | KDR_1344   | - | GTGACCTATGCACCAGACGTAATTATGTGGTGATCTATCTTTCTGTTTATCTAGTCTTTAGATCGGAAGAGCGGTTTCAG    |
| chr4 | 55964254  | 55964293  | KDR_1345   | - | GTGACCTATGCACCAGACGTAATTGCTATTAATTTGATATTGTGTTTACCAGGCCATCTCAGATCGGAAGAGCGGTTTCAG   |
| chr4 | 55964814  | 55964853  | KDR_1346   | - | GTGACCTATGCACCAGACGTAATTTCCCTTCTGCCATGCACATGGTTTTTCATGATTAAGATCGGAAGAGCGGTTTCAG     |
| chr4 | 55968479  | 55968518  | KDR_1347   | - | GTGACCTATGCACCAGACGTTAATGGCTATCACTTTGGGTTGCAGAACCTTTCCAGGATAGATCGGAAGAGCGGTTTCAG    |
| chr4 | 55970760  | 55970799  | KDR_1348   | - | GTGACCTATGCACCAGACGTAATTCTGGATCATTGTGCAGAGGCAGTTGGAATGCCTTAAAGATCGGAAGAGCGGTTTCAG   |
| chr4 | 55971949  | 55971988  | KDR_1349   | - | GTGACCTATGCACCAGACGTTTCTCTGGAGGTTGGGTTGGATCACTCACACAGTGGGTAAGATCGGAAGAGCGGTTTCAG    |
| chr4 | 55972804  | 55972843  | KDR_1350   | - | GTGACCTATGCACCAGACGTAGTTTTAAAAATTTGAAAATCTCTCTCTCTTAATGGAAGGAGATCGGAAGAGCGGTTTCAG   |
| chr4 | 55973854  | 55973893  | KDR_1351   | - | GTGACCTATGCACCAGACGTTCCACATCTCTTTGCTTTCCCTCCCATCTTGCATTTCTTACAGATCGGAAGAGCGGTTTCAG  |
| chr4 | 55976520  | 55976559  | KDR_1352   | - | GTGACCTATGCACCAGACGTTCAATTTGCTCTCTGCCCAGATTTATATGATACATTGAGATCGGAAGAGCGGTTTCAG      |
| chr4 | 55976771  | 55976810  | KDR_1353   | - | GTGACCTATGCACCAGACGTGAAATAATGCAAAGCATCATTTCGTGTGAGAGCAAATCCAGATCGGAAGAGCGGTTTCAG    |
| chr4 | 55979421  | 55979460  | KDR_1354   | - | GTGACCTATGCACCAGACGTGCTTGGAAATATTCTGTGCCTTGACAAGTGAGATAATTAGATCGGAAGAGCGGTTTCAG     |
| chr4 | 55980243  | 55980282  | KDR_1355   | - | GTGACCTATGCACCAGACGTTGATTCAAAGCCAGACCTCCAATACTTAGATAATAAGCCAGATCGGAAGAGCGGTTTCAG    |
| chr4 | 55980991  | 55981030  | KDR_1356   | - | GTGACCTATGCACCAGACGTATTTCCCTTCCATATCATTAAATAACATATCCTTGTATTAAAGATCGGAAGAGCGGTTTCAG  |
| chr4 | 55981398  | 55981437  | KDR_1357   | - | GTGACCTATGCACCAGACGTTCTCCCAATCGTCTCTTAAGTTTTATAATTTAAGCTAGATCGGAAGAGCGGTTTCAG       |
| chr4 | 55984721  | 55984760  | KDR_1358   | - | GTGACCTATGCACCAGACGTAAATAAAATTCATTTCCACGTTCTTTTACCAGTTATAAAAGATCGGAAGAGCGGTTTCAG    |
| chr4 | 55987214  | 55987253  | KDR_1359   | - | GTGACCTATGCACCAGACGTATTCTAGATCTAGATTTCTGTGTTAAGTAAGTATTGTTAGATCGGAAGAGCGGTTTCAG     |
| chr4 | 55991344  | 55991383  | KDR_1360   | - | GTGACCTATGCACCAGACGTCACTCTGGAGGAGGAAGGCAGACAGGTCGGGTGAGGGCGGAGATCGGAAGAGCGGTTTCAG   |
| chr7 | 150690842 | 150690881 | NOS3_1361  | - | GTGACCTATGCACCAGACGTGTCCACTCTGCTGCCTGCTCCAGCAGAGCCCTGGCCTTTTATAGATCGGAAGAGCGGTTTCAG |
| chr7 | 150692241 | 150692280 | NOS3_1362  | - | GTGACCTATGCACCAGACGTCCAGGGATAGGGTGCATCAGGAAGGGTTGTTTCCCTTTACAGATCGGAAGAGCGGTTTCAG   |
| chr7 | 150693801 | 150693840 | NOS3_1363  | - | GTGACCTATGCACCAGACGTGGGGGTGGGAAGGGCAAGCAGGAAGTTGTGTGGACAAGATCGGAAGAGCGGTTTCAG       |
| chr7 | 150695395 | 150695434 | NOS3_1364  | - | GTGACCTATGCACCAGACGTGAGGCAGCGGAGAGAGGGTGCAGGAGACAGACGGGGGAGATCGGAAGAGCGGTTTCAG      |
| chr7 | 150695577 | 150695616 | NOS3_1365  | - | GTGACCTATGCACCAGACGTTGGGAAAGAGCTGGTGCAGAGCCCCGCTTCCCTGCCTTGAGATCGGAAGAGCGGTTTCAG    |
| chr7 | 150695984 | 150696023 | NOS3_1366  | - | GTGACCTATGCACCAGACGTTGGGCCAGAGGGGTTCTGGGGCTGAGCCCTCATGCCCTCCAGATCGGAAGAGCGGTTTCAG   |
| chr7 | 150696228 | 150696267 | NOS3_1367  | - | GTGACCTATGCACCAGACGTTGGGGTGTGGGATCAGCACCCCTTGCAAGGCCCTTTGAAGATCGGAAGAGCGGTTTCAG     |
| chr7 | 150697536 | 150697575 | NOS3_1368  | - | GTGACCTATGCACCAGACGTAGGGTGTGTGGCATCGGTAGGCAGAGGTTGATCACGGGGAGATCGGAAGAGCGGTTTCAG    |
| chr7 | 150698269 | 150698308 | NOS3_1369  | - | GTGACCTATGCACCAGACGTGAGAGAGGGGGAGGCTCAAACAGACCACAGCCCTCGAGATCGGAAGAGCGGTTTCAG       |
| chr7 | 150698582 | 150698621 | NOS3_1370  | - | GTGACCTATGCACCAGACGTATGATGGGTTGGGAGGGGAGGTAAGAAAAGGAAAGTTAGATCGGAAGAGCGGTTTCAG      |
| chr7 | 150698859 | 150698898 | NOS3_1371  | - | GTGACCTATGCACCAGACGTGGAAGGTGTGAGGGTGTCTGGTGCACAGAGGCAGGGCCAGATCGGAAGAGCGGTTTCAG     |
| chr7 | 150699238 | 150699277 | NOS3_1372  | - | GTGACCTATGCACCAGACGTGAAGACAGATGTCCCTGGGTGCTGTGGCCCCGAGGCCCTAGATCGGAAGAGCGGTTTCAG    |
| chr7 | 150703465 | 150703504 | NOS3_1373  | - | GTGACCTATGCACCAGACGTGAGTGTTCATCAGGGTTAGTTTTGTTTCATTTCAAAGTATCGGAAGAGCGGTTTCAG       |
| chr7 | 150703927 | 150703966 | NOS3_1374  | - | GTGACCTATGCACCAGACGTAGGACAAAGACAAGTTGTCAACAGGCCCTGGGGATACAGATCGGAAGAGCGGTTTCAG      |
| chr7 | 150704140 | 150704179 | NOS3_1375  | - | GTGACCTATGCACCAGACGTGGGGTCCGTCAGTGCAGCTCCCTTTGCAGGCCACGTTTGCAGATCGGAAGAGCGGTTTCAG   |
| chr7 | 150705968 | 150706007 | NOS3_1376  | - | GTGACCTATGCACCAGACGTGGCCGGTGGGGCTGAGGACCTCCCGCCACCAGGGGTGCAGATCGGAAGAGCGGTTTCAG     |
| chr7 | 150706227 | 150706266 | NOS3_1377  | - | GTGACCTATGCACCAGACGTGGAGGGCAAATGAGGCAGCCTGAGCTAGGGAGCAGGGCCAGATCGGAAGAGCGGTTTCAG    |
| chr7 | 150706436 | 150706475 | NOS3_1378  | - | GTGACCTATGCACCAGACGTGGAGAGGGGCACTTATGGGGAGTCAGAGAGGGGTGGGGCCAGATCGGAAGAGCGGTTTCAG   |
| chr7 | 150707153 | 150707192 | NOS3_1379  | - | GTGACCTATGCACCAGACGTTGCACAGGGAGCTCTGAGGACAGGCCCCAGCAGGATGCAAGATCGGAAGAGCGGTTTCAG    |
| chr7 | 150707635 | 150707674 | NOS3_1380  | - | GTGACCTATGCACCAGACGTAGGATGCAGTGGTTGGAGCCCCATAGACCCTTCTAGTAGATCGGAAGAGCGGTTTCAG      |
| chr7 | 150707937 | 150707976 | NOS3_1381  | - | GTGACCTATGCACCAGACGTGAAGGAGAGGCCGGTGGAGGGCCAGAGAGGGGCCGTTCCAGATCGGAAGAGCGGTTTCAG    |
| chr7 | 150709389 | 150709428 | NOS3_1382  | - | GTGACCTATGCACCAGACGTAGACACTCCATCAGGTCCCCTTTGCCTTTCTGCTCCACCAGATCGGAAGAGCGGTTTCAG    |
| chr7 | 150710269 | 150710308 | NOS3_1383  | - | GTGACCTATGCACCAGACGTCCCCGCGCTTGGGAAGGCTCTTCTCCGGGCACAGTGCTAAGATCGGAAGAGCGGTTTCAG    |
| chr7 | 150710762 | 150710801 | NOS3_1384  | - | GTGACCTATGCACCAGACGTGCGGGTTAGGGCGGGCCCTGGTGGGGTGGGCGCGGGGAGATCGGAAGAGCGGTTTCAG      |
| chr7 | 150711046 | 150711085 | NOS3_1385  | - | GTGACCTATGCACCAGACGTAGACACAGTGGATCAGAACCAGCTCGGAGACCTTAGCAAGATCGGAAGAGCGGTTTCAG     |
| chr9 | 98209144  | 98209183  | PTCH1_1386 | - | GTGACCTATGCACCAGACGTGAGCAACTGACCCAGCCAGCCAGCCAGCCAGCCAAAGAAGATCGGAAGAGCGGTTTCAG     |
| chr9 | 98211301  | 98211340  | PTCH1_1387 | - | GTGACCTATGCACCAGACGTCTGCAGAACCAGGGGGAGGGTCTTCCACCCTGGTAGTGAGATCGGAAGAGCGGTTTCAG     |
| chr9 | 98212073  | 98212112  | PTCH1_1388 | - | GTGACCTATGCACCAGACGTACACGGGGATGTCACAGTGTAGGCCGGCTGAATGCTGTGAGATCGGAAGAGCGGTTTCAG    |
| chr9 | 98218508  | 98218547  | PTCH1_1389 | - | GTGACCTATGCACCAGACGTCAATTTGAAGCAAAAATTTGTGAAAAACAACCCATTTCCAGATCGGAAGAGCGGTTTCAG    |
| chr9 | 98220245  | 98220284  | PTCH1_1390 | - | GTGACCTATGCACCAGACGTTATAAGGGCTTTGTGGAAGTCAAATTCCTTTTCAGATAGAGATCGGAAGAGCGGTTTCAG    |
| chr9 | 98221832  | 98221871  | PTCH1_1391 | - | GTGACCTATGCACCAGACGTTTTATCGGGAGTGTGGGAACTACAGAGGTGCTTCCAGATCGGAAGAGCGGTTTCAG        |
| chr9 | 98224088  | 98224127  | PTCH1_1392 | - | GTGACCTATGCACCAGACGTGCTGGGCATGAGGGGCTCCAGGGTCTCGGGCCGCTGATCGGAAGAGCGGTTTCAG         |



|       |          |          |            |   |                                                                                     |
|-------|----------|----------|------------|---|-------------------------------------------------------------------------------------|
| chr9  | 98229348 | 98229387 | PTCH1_1393 | - | GTGACCTATGCACCAGACGCTGTGGGAGGCTCTCGTCTTTTCGGTCTTTTTCGGTGTTCAGCAGATCGGAAGAGCGGTTTCAG |
| chr9  | 98230983 | 98231022 | PTCH1_1394 | - | GTGACCTATGCACCAGACGTACAACCTTAAGGCTCTTCTGTCTTCAAATAAACAGAAAGATCGGAAGAGCGGTTTCAG      |
| chr9  | 98232045 | 98232084 | PTCH1_1395 | - | GTGACCTATGCACCAGACGTAGACTGCTGTGGCCTTTTGATTGGGTGCAGAATGGTGTGAGATCGGAAGAGCGGTTTCAG    |
| chr9  | 98238266 | 98238305 | PTCH1_1396 | - | GTGACCTATGCACCAGACGTGGTGATGAAGGCTGTGGTGATCCTGAACGGGGGACTGACTAGATCGGAAGAGCGGTTTCAG   |
| chr9  | 98238991 | 98239030 | PTCH1_1397 | - | GTGACCTATGCACCAGACGTAAACAAAAGAGAGCTTTGGGGACATCACAGCTTCTCTAGATCGGAAGAGCGGTTTCAG      |
| chr9  | 98239779 | 98239818 | PTCH1_1398 | - | GTGACCTATGCACCAGACGTAGCCATTTATCTGCTGTCCGTTGCAGAAATGCCACCCGGCCAGATCGGAAGAGCGGTTTCAG  |
| chr9  | 98240287 | 98240326 | PTCH1_1399 | - | GTGACCTATGCACCAGACGTGACCTGCTCTGGGGCTGGAGTTTGGTTTGGTTTGGTTAGATCGGAAGAGCGGTTTCAG      |
| chr9  | 98241232 | 98241271 | PTCH1_1400 | - | GTGACCTATGCACCAGACGTCTTGAATCGGCGTGCAGACTCGCTGGTTATGCAATTTAGATCGGAAGAGCGGTTTCAG      |
| chr9  | 98242201 | 98242240 | PTCH1_1401 | - | GTGACCTATGCACCAGACGTTCCCAGGACAATCTATGCCCTGTAGTCTTCTTCCCTTCCAGATCGGAAGAGCGGTTTCAG    |
| chr9  | 98242622 | 98242661 | PTCH1_1402 | - | GTGACCTATGCACCAGACGTGCAGTGAGCGCTCTCAGAAGGTGGAGAGCAAAACACTTTAGATCGGAAGAGCGGTTTCAG    |
| chr9  | 98244181 | 98244220 | PTCH1_1403 | - | GTGACCTATGCACCAGACGTGATCATGCTTTCTGTATGCTGTGACTTCTCTAGGACTCAGAGATCGGAAGAGCGGTTTCAG   |
| chr9  | 98244366 | 98244405 | PTCH1_1404 | - | GTGACCTATGCACCAGACGTTTCTGTTGGCAAAAATTTCTCAGGAACACCCCACTAGTGTGAGATCGGAAGAGCGGTTTCAG  |
| chr9  | 98247917 | 98247956 | PTCH1_1405 | - | GTGACCTATGCACCAGACGTCCCGCTCCACTAATGAGCAGCAGGTAAGGGCGTGGGAGATCGGAAGAGCGGTTTCAG       |
| chr9  | 98270393 | 98270432 | PTCH1_1406 | - | GTGACCTATGCACCAGACGTGACTCTCTCCCTCCACTTTCTCTCCCTCTCTAACTCTTAGATCGGAAGAGCGGTTTCAG     |
| chr9  | 98278701 | 98278740 | PTCH1_1407 | - | GTGACCTATGCACCAGACGTCCAGCGCGCGCGCCGACGCCACCTCGCTCGCGCCAGATCGGAAGAGCGGTTTCAG         |
| chr9  | 98278855 | 98278894 | PTCH1_1408 | - | GTGACCTATGCACCAGACGTGACGAGGGAAGACTGGGAGAAGACGGAGGACGGAGGACGAGATCGGAAGAGCGGTTTCAG    |
| chr9  | 98209414 | 98209453 | PTCH1_1409 | - | GTGACCTATGCACCAGACGTCCGGCTACTGCCAGCCATCACACTGTGACGGCTTCTGCAGATCGGAAGAGCGGTTTCAG     |
| chr5  | 1253793  | 1253832  | TERT_1410  | - | GTGACCTATGCACCAGACGTCCACAGCGCGCCGAGCAGACAGCAGCCCTGTCAAGATCGGAAGAGCGGTTTCAG          |
| chr5  | 1254433  | 1254472  | TERT_1411  | - | GTGACCTATGCACCAGACGTGTGGAGGCCAGTGCGGGCCCCACCTGCCAGGGGTATCCAGATCGGAAGAGCGGTTTCAG     |
| chr5  | 1255352  | 1255391  | TERT_1412  | - | GTGACCTATGCACCAGACGTGTGCTTGGCCTCAGTGGCAGCAGTGCCTGCCTGCTGGTGTAGATCGGAAGAGCGGTTTCAG   |
| chr5  | 1258663  | 1258702  | TERT_1413  | - | GTGACCTATGCACCAGACGTACCAGGGGTGCAGGCCAGCCCTCCAGGGACCCTCCGCGCAGATCGGAAGAGCGGTTTCAG    |
| chr5  | 1264469  | 1264508  | TERT_1414  | - | GTGACCTATGCACCAGACGTGTGGCCGGAAGTGGAGCCTGTGCCCGGCTGGGGCAGGTGCAGATCGGAAGAGCGGTTTCAG   |
| chr5  | 1266529  | 1266568  | TERT_1415  | - | GTGACCTATGCACCAGACGTGGCGTGTCTGTGGGACCTCCACAGCCTGTGGCTTTAGATCGGAAGAGCGGTTTCAG        |
| chr5  | 1268585  | 1268624  | TERT_1416  | - | GTGACCTATGCACCAGACGTCTCTCCCGAGGGGCTTGGGTGGGGGTTGATTTGCTTTAGATCGGAAGAGCGGTTTCAG      |
| chr5  | 1271184  | 1271223  | TERT_1417  | - | GTGACCTATGCACCAGACGTTGGCCAGGTGCCATTGCCCTGCGGGTGGCTGGGCGGGCTGAGATCGGAAGAGCGGTTTCAG   |
| chr5  | 1272250  | 1272289  | TERT_1418  | - | GTGACCTATGCACCAGACGTTGCCCTGCAGGTTGGGACGGACTCCCAGCAGTGGGTCCAGATCGGAAGAGCGGTTTCAG     |
| chr5  | 1278706  | 1278745  | TERT_1419  | - | GTGACCTATGCACCAGACGTGCTGTGATAGTCTGTCCAGGATGTGTGCTCTGGGATATAGATCGGAAGAGCGGTTTCAG     |
| chr5  | 1279356  | 1279395  | TERT_1420  | - | GTGACCTATGCACCAGACGTGGGACCCCGTGAGCAGCCCTGCTGACCTTGGGAGTGGCAGATCGGAAGAGCGGTTTCAG     |
| chr5  | 1280223  | 1280262  | TERT_1421  | - | GTGACCTATGCACCAGACGTTTTGGTTAACTTCTTTTAAACAGAAGTGCGTTGAGCAGATCGGAAGAGCGGTTTCAG       |
| chr5  | 1282494  | 1282533  | TERT_1422  | - | GTGACCTATGCACCAGACGTCCCACGCGAGCCCTCTGCTTCTCGAAGTCTGGAACCAAGATCGGAAGAGCGGTTTCAG      |
| chr5  | 1293378  | 1293417  | TERT_1423  | - | GTGACCTATGCACCAGACGTGGTGGCCGTGAGGGGCCAGGCCAGAGCTGAATGCAGTATAGATCGGAAGAGCGGTTTCAG    |
| chr5  | 1294836  | 1294875  | TERT_1424  | - | GTGACCTATGCACCAGACGTCCGGGGTCCGGCTCCGGCTGGGGTTGAGGGCGGCCGGGGAGATCGGAAGAGCGGTTTCAG    |
| chr5  | 1293829  | 1293868  | TERT_1425  | - | GTGACCTATGCACCAGACGTGGTTGCCCGCCTGCCACAGCGCTACTGGCAATGCGGCCAGATCGGAAGAGCGGTTTCAG     |
| chr5  | 1294280  | 1294319  | TERT_1426  | - | GTGACCTATGCACCAGACGTGCCAGCCGAAGTGTGCCCTGGCCCAAGAGGCCAGGCGTGAGATCGGAAGAGCGGTTTCAG    |
| chr16 | 2098567  | 2098606  | TSC2_1427  | - | GTGACCTATGCACCAGACGTGACGACAGCAAAAAACCCTCTGTGCAAAACGAAACGAAATAGATCGGAAGAGCGGTTTCAG   |
| chr16 | 2100351  | 2100390  | TSC2_1428  | - | GTGACCTATGCACCAGACGTATGAAAGAAGAAAAAGGGGCCAGTGTCTCAGGCCACGGTCTAGATCGGAAGAGCGGTTTCAG  |
| chr16 | 2103293  | 2103332  | TSC2_1429  | - | GTGACCTATGCACCAGACGTGACAGGGGACAGCGGTGAGGATGTGCTCTCCAAGAACCCTAGATCGGAAGAGCGGTTTCAG   |
| chr16 | 2104247  | 2104286  | TSC2_1430  | - | GTGACCTATGCACCAGACGTAAAGCCACAGGATCAGCAGAGCCTGCCAGCGTCCGCCACACAGATCGGAAGAGCGGTTTCAG  |
| chr16 | 2105353  | 2105392  | TSC2_1431  | - | GTGACCTATGCACCAGACGTAGCGGGCCAGTTTGCAGGAGCAGCCGAATCTACATCTCCAGATCGGAAGAGCGGTTTCAG    |
| chr16 | 2106147  | 2106186  | TSC2_1432  | - | GTGACCTATGCACCAGACGTGACGAGCTCAGTCCCGGCAGCAGCTCCCTGGATGGCCGAGATCGGAAGAGCGGTTTCAG     |
| chr16 | 2106595  | 2106634  | TSC2_1433  | - | GTGACCTATGCACCAGACGTGGGAGACGGCTCACGCCCTCCTACCCAGCTCTCCCAAGATCGGAAGAGCGGTTTCAG       |
| chr16 | 2107056  | 2107095  | TSC2_1434  | - | GTGACCTATGCACCAGACGTCAATGCGTGTGAGGGGCTGGCAGGCATAAGCCCTGCCCCAGATCGGAAGAGCGGTTTCAG    |
| chr16 | 2108698  | 2108737  | TSC2_1435  | - | GTGACCTATGCACCAGACGTTCCCGAGAGAGCGGAATGTGAGCAGGGCCCTGTCCAGGAGATCGGAAGAGCGGTTTCAG     |
| chr16 | 2110621  | 2110660  | TSC2_1436  | - | GTGACCTATGCACCAGACGTAGCCCGCCAGCACACAGGGTTCAGAGCTGCTTCTGCTGAGATCGGAAGAGCGGTTTCAG     |
| chr16 | 2111822  | 2111861  | TSC2_1437  | - | GTGACCTATGCACCAGACGTAGGCAGATGACACAGGCTGACTTCCACTCCCCACATCGGAAGAGCGGTTTCAG           |
| chr16 | 2112448  | 2112487  | TSC2_1438  | - | GTGACCTATGCACCAGACGTAAAGAGCGGTGTGCCCTCTGCCCTCCGGCTCTCTAGATCGGAAGAGCGGTTTCAG         |
| chr16 | 2112923  | 2112962  | TSC2_1439  | - | GTGACCTATGCACCAGACGTGACGCTGTGGGGCGGTTGGGGAGTGCCCGGCCACAGCCAGATCGGAAGAGCGGTTTCAG     |
| chr16 | 2114223  | 2114262  | TSC2_1440  | - | GTGACCTATGCACCAGACGTACAAGGGAGGCCAATGAGCGCCAGCCCAACGAGGGCCACAAGATCGGAAGAGCGGTTTCAG   |
| chr16 | 2115470  | 2115509  | TSC2_1441  | - | GTGACCTATGCACCAGACGTAAAGGCCAGGACTTACACACAGGCTCATGTTCTGAGTCAGAGATCGGAAGAGCGGTTTCAG   |
| chr16 | 2120407  | 2120446  | TSC2_1442  | - | GTGACCTATGCACCAGACGTAGGACGCGACTCACACCGCGCAGGAGGTGAAAACGCACTAGATCGGAAGAGCGGTTTCAG    |
| chr16 | 2121461  | 2121500  | TSC2_1443  | - | GTGACCTATGCACCAGACGTGAGGATGGTGAAGCCAGAGCCAACTCGTGCAGGCCAGATCGGAAGAGCGGTTTCAG        |
| chr16 | 2121735  | 2121774  | TSC2_1444  | - | GTGACCTATGCACCAGACGTAAAGAGAGAGCTGAGGCCAAGTCCCGCAGCAGGAACGAGATCGGAAGAGCGGTTTCAG      |
| chr16 | 2122192  | 2122231  | TSC2_1445  | - | GTGACCTATGCACCAGACGTAGGAGGCGTACAGACAGGGCCTTCTGGACCCTAGAGACAGAGATCGGAAGAGCGGTTTCAG   |
| chr16 | 2122800  | 2122839  | TSC2_1446  | - | GTGACCTATGCACCAGACGTAATCCAGGCATGAAACCTCTCCCGAGCGGCCAGGTACGGAGATCGGAAGAGCGGTTTCAG    |
| chr16 | 2124151  | 2124190  | TSC2_1447  | - | GTGACCTATGCACCAGACGTGAGGACACCTCAGGCCACCCGCTTCAGCAGAGGCAGCAGATCGGAAGAGCGGTTTCAG      |
| chr16 | 2125750  | 2125789  | TSC2_1448  | - | GTGACCTATGCACCAGACGTGGAGAGGGTGGTCAAGGGAGCCGGGTTCCCGTGCAGCGCCAGATCGGAAGAGCGGTTTCAG   |
| chr16 | 2126019  | 2126058  | TSC2_1449  | - | GTGACCTATGCACCAGACGTAAGGGGCTGGACTGCTGACAGCAGGGAACACTCCAGATCGGAAGAGCGGTTTCAG         |
| chr16 | 2126442  | 2126481  | TSC2_1450  | - | GTGACCTATGCACCAGACGTGAGCACACCCAGACAGTGTAGGGTGGCAATGGGGCTGGAAGATCGGAAGAGCGGTTTCAG    |

|       |           |           |             |   |                                                                                         |
|-------|-----------|-----------|-------------|---|-----------------------------------------------------------------------------------------|
| chr16 | 2127549   | 2127588   | TSC2_1451   | - | GTGACCTATGCACCAGACGTAGGAAGGAGCCCCAACGCCCCAGAGAGCCAGCTCCCGGGAGATCGGAAGAGCGGTTTCAG        |
| chr16 | 2128983   | 2129022   | TSC2_1452   | - | GTGACCTATGCACCAGACGTAGGCCGTGACCAGGGTCAGGGTGCCAGGTAGGGCGGGCCGAGATCGGAAGAGCGGTTTCAG       |
| chr16 | 2129227   | 2129266   | TSC2_1453   | - | GTGACCTATGCACCAGACGTGGGAGCGTGAAACCCAGCTTGCCCGTGGAGCTCCCGCAGGAGATCGGAAGAGCGGTTTCAG       |
| chr16 | 2129508   | 2129547   | TSC2_1454   | - | GTGACCTATGCACCAGACGTAATCCCACGCACAGGGTGGACTTAGTCCCAGGCTGGTACAGATCGGAAGAGCGGTTTCAG        |
| chr16 | 2130116   | 2130155   | TSC2_1455   | - | GTGACCTATGCACCAGACGTGGGCAGAGGACTGGTGACCACCACTTACCTGATGCAAAACAGATCGGAAGAGCGGTTTCAG       |
| chr16 | 2131546   | 2131585   | TSC2_1456   | - | GTGACCTATGCACCAGACGTGGCAGCAGCTTTGGCCTGAGGCCAGTACCTCCCCTTACCAGATCGGAAGAGCGGTTTCAG        |
| chr16 | 2132387   | 2132426   | TSC2_1457   | - | GTGACCTATGCACCAGACGTGAGCCGTGTGCCGCGTGTCCGGCAGTCAGCAGAGGAGGGGCTACACAGATCGGAAGAGCGGTTTCAG |
| chr16 | 2133646   | 2133685   | TSC2_1458   | - | GTGACCTATGCACCAGACGTACAGACGGGGCTGCTGGATGTGGGGCTGGGCCAGGCCCTGAGATCGGAAGAGCGGTTTCAG       |
| chr16 | 2134179   | 2134218   | TSC2_1459   | - | GTGACCTATGCACCAGACGTCCATCCCAAAGAGAACCCCTGTCAGCAGGCCACCCTCGAGCAGATCGGAAGAGCGGTTTCAG      |
| chr16 | 2134902   | 2134941   | TSC2_1460   | - | GTGACCTATGCACCAGACGTAGGGGATGGTGGGCACCAGGTGAGGGCCTGGCCAGGGCAAGATCGGAAGAGCGGTTTCAG        |
| chr16 | 2135181   | 2135220   | TSC2_1461   | - | GTGACCTATGCACCAGACGTACAGAGCCCTGCCTGAGCCCCAGACGCCCGTCCACAGGAGGAGATCGGAAGAGCGGTTTCAG      |
| chr16 | 2136144   | 2136183   | TSC2_1462   | - | GTGACCTATGCACCAGACGTAGGGGAGAGGCCAGGGTGGCATCTCCCGGGCCGGGCCCTAGATCGGAAGAGCGGTTTCAG        |
| chr16 | 2136683   | 2136722   | TSC2_1463   | - | GTGACCTATGCACCAGACGTGACAGGCCGGATGGGTTTGTGGGGCCAGTGTCTGAGGCCCTAGATCGGAAGAGCGGTTTCAG      |
| chr16 | 2137814   | 2137853   | TSC2_1464   | - | GTGACCTATGCACCAGACGTAAGAGAAAGGGTTCATCCCCGCACACAGCGTGTGCTGAAGGAGATCGGAAGAGCGGTTTCAG      |
| chr16 | 2137999   | 2138038   | TSC2_1465   | - | GTGACCTATGCACCAGACGTTTGGTGGTACGCCAGGCCAGGGCTCTTGGCCGCACACTAGATCGGAAGAGCGGTTTCAG         |
| chr16 | 2138178   | 2138217   | TSC2_1466   | - | GTGACCTATGCACCAGACGTAGGCAGGGGGTGTAGCTACTATCAGGTGGCAGCTGGGCCCTAGATCGGAAGAGCGGTTTCAG      |
| chr16 | 2138397   | 2138436   | TSC2_1467   | - | GTGACCTATGCACCAGACGTAGGCCGGCTTGGGCAGTAAAGTCTGGGAGGGCGTGGCAACCCGAGATCGGAAGAGCGGTTTCAG    |
| chr15 | 91290573  | 91290612  | BLM_1468    | - | GTGACCTATGCACCAGACGTAGTGAGGAAAAAGAAATCAGTGGAGTTAGGTACTTTTCAAGATCGGAAGAGCGGTTTCAG        |
| chr15 | 91292547  | 91292586  | BLM_1469    | - | GTGACCTATGCACCAGACGTATGGAAAACTAGATTAGATGGATCCATTTTAAAGAAACCCAGATCGGAAGAGCGGTTTCAG       |
| chr15 | 91294967  | 91295006  | BLM_1470    | - | GTGACCTATGCACCAGACGTACAGTTGATAAACATAGATTTGTTAACCACTAATGAGACAAGATCGGAAGAGCGGTTTCAG       |
| chr15 | 91297991  | 91298030  | BLM_1471    | - | GTGACCTATGCACCAGACGTAAAAAATGTTAAGCCAAATCATACTATAGGCTAGACTCAATAGATCGGAAGAGCGGTTTCAG      |
| chr15 | 91303327  | 91303366  | BLM_1472    | - | GTGACCTATGCACCAGACGTATTATGTTGTTAATATTTTCTTTGAGGGAAAAAAGATCGGAAGAGCGGTTTCAG              |
| chr15 | 91303774  | 91303813  | BLM_1473    | - | GTGACCTATGCACCAGACGTAAAAAGAGAACACCTAATAAATAAGTAGTTACTCTGGAGATCGGAAGAGCGGTTTCAG          |
| chr15 | 91306146  | 91306185  | BLM_1474    | - | GTGACCTATGCACCAGACGTAATCAACGTTAAGAAAACTAGTACATGAATACAGTGAAGAAAGATCGGAAGAGCGGTTTCAG      |
| chr15 | 91308476  | 91308515  | BLM_1475    | - | GTGACCTATGCACCAGACGTACAAATGAAAAATATCTGTGAGGTTCTGTCTTACAGAGCATAGATCGGAAGAGCGGTTTCAG      |
| chr15 | 91310090  | 91310129  | BLM_1476    | - | GTGACCTATGCACCAGACGTAAGTAGTAAACAATTTCAATTTTATACATTAACCTGACAAGATCGGAAGAGCGGTTTCAG        |
| chr15 | 91312313  | 91312352  | BLM_1477    | - | GTGACCTATGCACCAGACGTAATACATTAGACATGTAAAAAACTGAAACACATCACCTCAGATCGGAAGAGCGGTTTCAG        |
| chr15 | 91312618  | 91312657  | BLM_1478    | - | GTGACCTATGCACCAGACGTAAAAAATACTGCTTTTACAGTACTTGGAGCTTCTTCTAGATCGGAAGAGCGGTTTCAG          |
| chr15 | 91326002  | 91326041  | BLM_1479    | - | GTGACCTATGCACCAGACGTCCCAAGATAAATTTAGTTATTAGAAAAATATGACATAGATCGGAAGAGCGGTTTCAG           |
| chr15 | 91328101  | 91328140  | BLM_1480    | - | GTGACCTATGCACCAGACGTACCAAGACTGACAAACAGAAATTTTAAACATAAACAAAGATCGGAAGAGCGGTTTCAG          |
| chr15 | 91333829  | 91333868  | BLM_1481    | - | GTGACCTATGCACCAGACGTAGCAAAAGCTTATTAGATTATAAGGCACAGACTTGAAGGAGATCGGAAGAGCGGTTTCAG        |
| chr15 | 91337347  | 91337386  | BLM_1482    | - | GTGACCTATGCACCAGACGTTGAAGACTATAGTAAGACATACTTATAGGGGAAAAATAGAAGATCGGAAGAGCGGTTTCAG       |
| chr15 | 91341370  | 91341409  | BLM_1483    | - | GTGACCTATGCACCAGACGTAAGAGAAATACTTTCTGCTATAATTAAGGTAACAATGCCTAGATCGGAAGAGCGGTTTCAG       |
| chr15 | 91346701  | 91346740  | BLM_1484    | - | GTGACCTATGCACCAGACGTGATACAGGAAGTAAGATGAGTAAATGTACGTATATCATAGATCGGAAGAGCGGTTTCAG         |
| chr15 | 91347347  | 91347386  | BLM_1485    | - | GTGACCTATGCACCAGACGTAGCAAAACAAATCATAGGAGTGGGTATATGTGCACTTGTACAGATCGGAAGAGCGGTTTCAG      |
| chr15 | 91352317  | 91352356  | BLM_1486    | - | GTGACCTATGCACCAGACGTGCATAAAATTAAGAAATTTAAATTTACCCATAGAAAAACCAGATCGGAAGAGCGGTTTCAG       |
| chr15 | 91354385  | 91354424  | BLM_1487    | - | GTGACCTATGCACCAGACGTAAAAATGCAGATGTTTACAGGTGATGTGCACTGGTCCACGAGATCGGAAGAGCGGTTTCAG       |
| chr15 | 91358282  | 91358321  | BLM_1488    | - | GTGACCTATGCACCAGACGTACAAAGAAAAAATCAAATGTTAATGAAACCAAAAATGAGATCGGAAGAGCGGTTTCAG          |
| chr15 | 91292897  | 91292936  | BLM_1489    | - | GTGACCTATGCACCAGACGTATCTGGTGAAGAATAAATTTCTAATTTCTTGGAGCAGTAAGATCGGAAGAGCGGTTTCAG        |
| chr15 | 91304105  | 91304144  | BLM_1490    | - | GTGACCTATGCACCAGACGTTTTTTCCTAGTCTTGGTGTTCAGCCAGTTGCTACTTAAGATCGGAAGAGCGGTTTCAG          |
| chr11 | 119077078 | 119077117 | CBL_1491    | - | GTGACCTATGCACCAGACGTGGGTCCGAGCCGAGCGGGTCCCGGCTCGGCTCGACTGAGATCGGAAGAGCGGTTTCAG          |
| chr11 | 119103108 | 119103147 | CBL_1492    | - | GTGACCTATGCACCAGACGTTGAAAAAGAAGGGCTATTACTTGGAGAATTTTAAAGACAGAGATCGGAAGAGCGGTTTCAG       |
| chr11 | 119144528 | 119144567 | CBL_1493    | - | GTGACCTATGCACCAGACGTGGTGGAGAGGAGGCATAAAGTAAATAACAGAGATAATTCAGATCGGAAGAGCGGTTTCAG        |
| chr11 | 119145492 | 119145531 | CBL_1494    | - | GTGACCTATGCACCAGACGTAAGATCAATCACAGACTATTAGGTCAGATGTACAACCAAGATCGGAAGAGCGGTTTCAG         |
| chr11 | 119146657 | 119146696 | CBL_1495    | - | GTGACCTATGCACCAGACGTACATAAACCAAGCGTTTGTAGATTAGTCTGGTATTACGGAGATCGGAAGAGCGGTTTCAG        |
| chr11 | 119148417 | 119148456 | CBL_1496    | - | GTGACCTATGCACCAGACGTTAACCAACCTGGGTTTTTAAAGCAATTTGCCAGTGCAGATCGGAAGAGCGGTTTCAG           |
| chr11 | 119148826 | 119148865 | CBL_1497    | - | GTGACCTATGCACCAGACGTAAAAAATTAAGAGACTATTAGTTGAATAAATACTGCAATAGATCGGAAGAGCGGTTTCAG        |
| chr11 | 119149170 | 119149209 | CBL_1498    | - | GTGACCTATGCACCAGACGTAGCAAAAGATAGTAACAGATGCATCTGAAAATACTTAAAAAGATCGGAAGAGCGGTTTCAG       |
| chr11 | 119155629 | 119155668 | CBL_1499    | - | GTGACCTATGCACCAGACGTTAAAAATTTAACAGATTACTTTCTGTTTGGGAAATGGCAAGATCGGAAGAGCGGTTTCAG        |
| chr11 | 119155849 | 119155888 | CBL_1500    | - | GTGACCTATGCACCAGACGTAGGGTGAAGCAAAATCAGTAAAAACCCACTAGTACACAGCAGATCGGAAGAGCGGTTTCAG       |
| chr11 | 119158512 | 119158551 | CBL_1501    | - | GTGACCTATGCACCAGACGTAAGAAAAGTGTGAAAAACAATTTCTTACCACAGCTGAGAGATCGGAAGAGCGGTTTCAG         |
| chr11 | 119167578 | 119167617 | CBL_1502    | - | GTGACCTATGCACCAGACGTAAAGATAAAAAATGAAAAAGAAAGTAAACAACCAAGTAAACAGATCGGAAGAGCGGTTTCAG      |
| chr11 | 119168044 | 119168083 | CBL_1503    | - | GTGACCTATGCACCAGACGTAGGAAAAGTGCATAATGATCTTTGAAATAGAAGTGTATAGATCGGAAGAGCGGTTTCAG         |
| chr11 | 119169018 | 119169057 | CBL_1504    | - | GTGACCTATGCACCAGACGTATGAGTGATGTTATCTTCTTGTGACGCACCTCATCTTCTAAGATCGGAAGAGCGGTTTCAG       |
| chr11 | 119170155 | 119170194 | CBL_1505    | - | GTGACCTATGCACCAGACGTTAGGAAAGAAAATTTTGAATCTGGGAAATCCTCATTAGATCGGAAGAGCGGTTTCAG           |
| chr17 | 48262813  | 48262852  | COL1A1_1506 | - | GTGACCTATGCACCAGACGTTCCCAACCTGGCTCCCTCCCACCAACCACTTTCCCCAGATCGGAAGAGCGGTTTCAG           |
| chr17 | 48263089  | 48263128  | COL1A1_1507 | - | GTGACCTATGCACCAGACGTAGATACCCAGGCAGGGCCACCTCCGGCCTTGGGCTAGATCGGAAGAGCGGTTTCAG            |
| chr17 | 48263628  | 48263667  | COL1A1_1508 | - | GTGACCTATGCACCAGACGTTGGACCTCAGGCCAGTGTAGGAGATGGGCTAGCCAGTATAGATCGGAAGAGCGGTTTCAG        |

|       |           |           |             |   |                                                                                     |
|-------|-----------|-----------|-------------|---|-------------------------------------------------------------------------------------|
| chr17 | 48263951  | 48263990  | COL1A1_1509 | - | GTGACCTATGCACCAGACGTGCCCTAGCCTCTCCCTCCCTCCTACTCCTGCCATGCCAGGAGATCGGAAGAGCGGTTTCAG   |
| chr17 | 48264326  | 48264365  | COL1A1_1510 | - | GTGACCTATGCACCAGACGTCTCATCCCTCTGCTCATGGCCCTCCAGCCCCAAAGCAAGATCGGAAGAGCGGTTTCAG      |
| chr17 | 48264795  | 48264834  | COL1A1_1511 | - | GTGACCTATGCACCAGACGTCTTCTCTCTCCTCTTCTGAGCCCCAAGCCCAGGCTCACAGATCGGAAGAGCGGTTTCAG     |
| chr17 | 48265187  | 48265226  | COL1A1_1512 | - | GTGACCTATGCACCAGACGTTCAGCCCCCTCCCAGTCCCATGCTGTGCTGTGGGATAGGAGATCGGAAGAGCGGTTTCAG    |
| chr17 | 48265407  | 48265446  | COL1A1_1513 | - | GTGACCTATGCACCAGACGTGTGCTGTGCCCTATGCCTTTAGAAGCTACAGATGCAGAAGATCGGAAGAGCGGTTTCAG     |
| chr17 | 48265841  | 48265880  | COL1A1_1514 | - | GTGACCTATGCACCAGACGTGGGCTCCAGTTCCCTGTACCTGGTGCAGGCTCCGACTCTTAGATCGGAAGAGCGGTTTCAG   |
| chr17 | 48266053  | 48266092  | COL1A1_1515 | - | GTGACCTATGCACCAGACGTAACACTCCATGACCACAGCCTTGTCTGCTGCTTCCCTGCCAGATCGGAAGAGCGGTTTCAG   |
| chr17 | 48266214  | 48266253  | COL1A1_1516 | - | GTGACCTATGCACCAGACGTCCCAGCCCCATGCCAGTACCCTCAGCATGGCCATTGTGGAGATCGGAAGAGCGGTTTCAG    |
| chr17 | 48266479  | 48266518  | COL1A1_1517 | - | GTGACCTATGCACCAGACGTCCCTCACCTTGGGGGGCCCTGAGAAAACCATCACAGGACAGATCGGAAGAGCGGTTTCAG    |
| chr17 | 48266688  | 48266727  | COL1A1_1518 | - | GTGACCTATGCACCAGACGTGCTCAGATCTCTGCAGCTCCGGAGGTGTGCAGAGCTGGGGAGATCGGAAGAGCGGTTTCAG   |
| chr17 | 48266990  | 48267029  | COL1A1_1519 | - | GTGACCTATGCACCAGACGTGCAGCAGACTCCACTGCTCTAGGTTGGGGGTGCTGGGTGGAGATCGGAAGAGCGGTTTCAG   |
| chr17 | 48267170  | 48267209  | COL1A1_1520 | - | GTGACCTATGCACCAGACGTCCCAGCTCTCTGTGAGCCTCCTCCCTCCTCCCAGGCACAGATCGGAAGAGCGGTTTCAG     |
| chr17 | 48267312  | 48267351  | COL1A1_1521 | - | GTGACCTATGCACCAGACGTGGCCCTCTGTGCCACAGAGGCTGTGGGCTGGGACCCAGAGATCGGAAGAGCGGTTTCAG     |
| chr17 | 48267638  | 48267677  | COL1A1_1522 | - | GTGACCTATGCACCAGACGTAGACCCCCATCATTTTTTTCATCACCAGCTGGGACCTGGGACAGATCGGAAGAGCGGTTTCAG |
| chr17 | 48267854  | 48267893  | COL1A1_1523 | - | GTGACCTATGCACCAGACGTAAGACCTGTTAAGACCCATACTTGGCCCTCCCTCCCTTAGATCGGAAGAGCGGTTTCAG     |
| chr17 | 48268128  | 48268167  | COL1A1_1524 | - | GTGACCTATGCACCAGACGTGCCTCCCCACCTTCTGCCCTAACACATAGCCTCCTCAGCAGATCGGAAGAGCGGTTTCAG    |
| chr17 | 48268694  | 48268733  | COL1A1_1525 | - | GTGACCTATGCACCAGACGTCTTCCCCTCCCCTGAGCCCTACATGGCTCCCCTCTCTAGATCGGAAGAGCGGTTTCAG      |
| chr17 | 48269099  | 48269138  | COL1A1_1526 | - | GTGACCTATGCACCAGACGTCTGGAAAGGGGCTGTGCCAAGTGGCCAGGACAGGCTAGATCGGAAGAGCGGTTTCAG       |
| chr17 | 48269291  | 48269330  | COL1A1_1527 | - | GTGACCTATGCACCAGACGTCTCTCGCTGCATCCGTCAGAGTGGCTGCTGCTACTTGGCCAGATCGGAAGAGCGGTTTCAG   |
| chr17 | 48269786  | 48269825  | COL1A1_1528 | - | GTGACCTATGCACCAGACGTGCAGCCGGCCAGAGGGGTGGGAGATGCAGGGAATCCAGAGAGATCGGAAGAGCGGTTTCAG   |
| chr17 | 48269951  | 48269990  | COL1A1_1529 | - | GTGACCTATGCACCAGACGTATGGCTGTCAGGATGCTGGGAGGTAGGGGTAGGAAACACCAGATCGGAAGAGCGGTTTCAG   |
| chr17 | 48270108  | 48270147  | COL1A1_1530 | - | GTGACCTATGCACCAGACGTCTGATGGGGAGATCGGGGAGCAGAAAAGGGGAGACACCAGATCGGAAGAGCGGTTTCAG     |
| chr17 | 48270305  | 48270344  | COL1A1_1531 | - | GTGACCTATGCACCAGACGTCTTCCATCCCTACCTCCTTCCCATTGCTGCCCGGCACAGATCGGAAGAGCGGTTTCAG      |
| chr17 | 48271441  | 48271480  | COL1A1_1532 | - | GTGACCTATGCACCAGACGTCTCCCTGCAACCCCTGCCATTTGCTGCTGCCTCCCTAGATCGGAAGAGCGGTTTCAG       |
| chr17 | 48271660  | 48271699  | COL1A1_1533 | - | GTGACCTATGCACCAGACGTAGGCTTTTTCAGCCTGGCTGGCCAGGCCCTGACCATCCCGTAGATCGGAAGAGCGGTTTCAG  |
| chr17 | 48271884  | 48271923  | COL1A1_1534 | - | GTGACCTATGCACCAGACGTCTTGGCGCCGGGGGCTGACCCTGCCGCTCCCTGGGCATCAGATCGGAAGAGCGGTTTCAG    |
| chr17 | 48272032  | 48272071  | COL1A1_1535 | - | GTGACCTATGCACCAGACGTCTGCCCGCCCCCTCCCGCTCCACCCTATTGCCCTGGCTGGAGATCGGAAGAGCGGTTTCAG   |
| chr17 | 48272358  | 48272397  | COL1A1_1536 | - | GTGACCTATGCACCAGACGTCCGCCACTTCTTCTGAGCCACAGCCACCCTGCCCTAGGAAGATCGGAAGAGCGGTTTCAG    |
| chr17 | 48272543  | 48272582  | COL1A1_1537 | - | GTGACCTATGCACCAGACGTAACCTCCTTCTGCCACCCACTGCTGCTCCAGTGCAGATCGGAAGAGCGGTTTCAG         |
| chr17 | 48272745  | 48272784  | COL1A1_1538 | - | GTGACCTATGCACCAGACGTGGCCAGCTTCCAGTCCCACTCCTGCCCGCTGCAGCCCTGCCAGATCGGAAGAGCGGTTTCAG  |
| chr17 | 48272878  | 48272917  | COL1A1_1539 | - | GTGACCTATGCACCAGACGTCCGACTCAGTGTCCCTTTGCCACTTTCTAACCTCAGAGTAGATCGGAAGAGCGGTTTCAG    |
| chr17 | 48273234  | 48273273  | COL1A1_1540 | - | GTGACCTATGCACCAGACGTCCACTCTCCTCTAAGCATGACCCTCATGGGCCAAGGGGTAGATCGGAAGAGCGGTTTCAG    |
| chr17 | 48273466  | 48273505  | COL1A1_1541 | - | GTGACCTATGCACCAGACGTCTGTAGGCCCTCAGGGCCTGGGAGTGGGGAGGGGTCTCAGAGATCGGAAGAGCGGTTTCAG   |
| chr17 | 48273625  | 48273664  | COL1A1_1542 | - | GTGACCTATGCACCAGACGTGTGCCCTTTGGGGGATCCCTGAGCTCTGGAAGGGGCTCCAGATCGGAAGAGCGGTTTCAG    |
| chr17 | 48273795  | 48273834  | COL1A1_1543 | - | GTGACCTATGCACCAGACGTCCAGTTCCAGTAGGGCAGGATGGGACAGGAGGCAGGGCCAAAGATCGGAAGAGCGGTTTCAG  |
| chr17 | 48273928  | 48273967  | COL1A1_1544 | - | GTGACCTATGCACCAGACGTGTCTGAACATCATGGTCTCCACATCCCAGAGTCCCACCAGATCGGAAGAGCGGTTTCAG     |
| chr17 | 48274321  | 48274360  | COL1A1_1545 | - | GTGACCTATGCACCAGACGTTTTGAGTCATTTAAGCTCCCCAAGTCCCTAGCATACCCCCAGATCGGAAGAGCGGTTTCAG   |
| chr17 | 48274491  | 48274530  | COL1A1_1546 | - | GTGACCTATGCACCAGACGTGGCTGTGGCTGAACCTGGGCTTCACTGCACCTTGGGCTTCAAGATCGGAAGAGCGGTTTCAG  |
| chr17 | 48275043  | 48275082  | COL1A1_1547 | - | GTGACCTATGCACCAGACGTCCAGCAAGAAGATACCATCTGACCCCATGGCCTCCATGGGAGATCGGAAGAGCGGTTTCAG   |
| chr17 | 48275260  | 48275299  | COL1A1_1548 | - | GTGACCTATGCACCAGACGTTCTATACAGATTACTACTCCTTCTACAACACACAGACTCAGATCGGAAGAGCGGTTTCAG    |
| chr17 | 48275472  | 48275511  | COL1A1_1549 | - | GTGACCTATGCACCAGACGTATGACAGCTTTCATAGCCTCCTTGGGCTTTGGTCTTTTGGAGATCGGAAGAGCGGTTTCAG   |
| chr17 | 48275744  | 48275783  | COL1A1_1550 | - | GTGACCTATGCACCAGACGTAGGGGGAGCATGGATGACAGAAGAGAGAATGGGTATCCAGAGATCGGAAGAGCGGTTTCAG   |
| chr17 | 48276537  | 48276576  | COL1A1_1551 | - | GTGACCTATGCACCAGACGTAGGCCCTTGTGTGCCACTCTCCCCTGTTTTGTTTTTTGTTTAGATCGGAAGAGCGGTTTCAG  |
| chr17 | 48276729  | 48276768  | COL1A1_1552 | - | GTGACCTATGCACCAGACGTCACTCTGGGCTGTGGGGGGCTGCAGGTGGGCATGGCTCTCAGATCGGAAGAGCGGTTTCAG   |
| chr17 | 48276867  | 48276906  | COL1A1_1553 | - | GTGACCTATGCACCAGACGTGCCCTCGAATTTTGGCCCTGCGCGGCCCGTGACTCCTCACAGATCGGAAGAGCGGTTTCAG   |
| chr17 | 48278722  | 48278761  | COL1A1_1554 | - | GTGACCTATGCACCAGACGTAACCTTTTGGAGTGGCAAGATACTATATCGCGCCTTTCAGATCGGAAGAGCGGTTTCAG     |
| chr3  | 168802647 | 168802686 | MECOM_1555  | - | GTGACCTATGCACCAGACGTGTTGACCAGAGTGGGACCAAGTCCAACAGTAGCATGGCTCAGATCGGAAGAGCGGTTTCAG   |
| chr3  | 168806738 | 168806777 | MECOM_1556  | - | GTGACCTATGCACCAGACGTTCCCATAGTACAGCATCATGGTTACATTATGCATGAAACGAGATCGGAAGAGCGGTTTCAG   |
| chr3  | 168807738 | 168807777 | MECOM_1557  | - | GTGACCTATGCACCAGACGTTGGGTGACTTTAGAAAATAAGCTAGAGTAGATCCATGTACAGATCGGAAGAGCGGTTTCAG   |
| chr3  | 168810696 | 168810735 | MECOM_1558  | - | GTGACCTATGCACCAGACGTCTTTTACTTTTTAAACTCTGTGACGACTGAAATGAACATGAGATCGGAAGAGCGGTTTCAG   |
| chr3  | 168812814 | 168812853 | MECOM_1559  | - | GTGACCTATGCACCAGACGTAATTGTGTTATAAGTCAAAAGTACTTCTTTTTCGTTTATAGATCGGAAGAGCGGTTTCAG    |
| chr3  | 168819798 | 168819837 | MECOM_1560  | - | GTGACCTATGCACCAGACGTTAATTATGCTGACTTTCCAGAAATCTCCCCTCTAGATCGGAAGAGCGGTTTCAG          |
| chr3  | 168825664 | 168825703 | MECOM_1561  | - | GTGACCTATGCACCAGACGTTACTTTATATTTTTGACTAAAGTGATGTAGCATTAAAAAGAAGATCGGAAGAGCGGTTTCAG  |
| chr3  | 168830525 | 168830564 | MECOM_1562  | - | GTGACCTATGCACCAGACGTTGGATTGAGATTTCCAGCTTGTAAACTAACTTGTGATCAGATCGGAAGAGCGGTTTCAG     |
| chr3  | 168833121 | 168833160 | MECOM_1563  | - | GTGACCTATGCACCAGACGTATGGAAGATGACGAAATATGACAGATGTATGAAAGGCGGAGATCGGAAGAGCGGTTTCAG    |
| chr3  | 168838794 | 168838833 | MECOM_1564  | - | GTGACCTATGCACCAGACGTAACACTCCAGCCCTCCTTCCCACATCTGTCTCTTCCCAGATCGGAAGAGCGGTTTCAG      |
| chr3  | 168840318 | 168840357 | MECOM_1565  | - | GTGACCTATGCACCAGACGTTTTGTAGGCTACTTGGCCCTCTGTATGTCATCTAGATCGGAAGAGCGGTTTCAG          |
| chr3  | 168845582 | 168845621 | MECOM_1566  | - | GTGACCTATGCACCAGACGTGCATGTTGTACCATAACAATCTGTATTTTTTCTGCAATGAGATCGGAAGAGCGGTTTCAG    |

|       |           |           |             |   |                                                                                     |
|-------|-----------|-----------|-------------|---|-------------------------------------------------------------------------------------|
| chr3  | 168849167 | 168849206 | MECOM_1567  | - | GTGACCTATGCACCAGACGCTCTCAGCCACCTCCTTATCACCTTATCATCGCGACTATAAGATCGGAAGAGCGGTTTCAG    |
| chr3  | 168833573 | 168833612 | MECOM_1568  | - | GTGACCTATGCACCAGACGTACAAAAAAGTTGGAGCTTTACCTTACCCTTCCATGTTTCCAGATCGGAAGAGCGGTTTCAG   |
| chr3  | 168834025 | 168834064 | MECOM_1569  | - | GTGACCTATGCACCAGACGTTCCAGATACTGCCAGCTACACAGGATATTTTGAAGGCACTAAGATCGGAAGAGCGGTTTCAG  |
| chr17 | 11924154  | 11924193  | MAP2K4_1570 | - | GTGACCTATGCACCAGACGTGAAGAGCCGAGCGGCGCCGCGGCGCTGCAATGCAGCAAGAGATCGGAAGAGCGGTTTCAG    |
| chr17 | 11958156  | 11958195  | MAP2K4_1571 | - | GTGACCTATGCACCAGACGTACAAATAAAAAGTAAAGTTTCAAGTACTACAAAACAGCTAGATCGGAAGAGCGGTTTCAG    |
| chr17 | 11984623  | 11984662  | MAP2K4_1572 | - | GTGACCTATGCACCAGACGTATTGGGAAGCAATTTTTCCACATTTAAATAGGTTTTAACAGATCGGAAGAGCGGTTTCAG    |
| chr17 | 11998842  | 11998881  | MAP2K4_1573 | - | GTGACCTATGCACCAGACGTGACAAAAGATGTCAAAAAACACAATAATTTGTCAAAGATCGGAAGAGCGGTTTCAG        |
| chr17 | 12011057  | 12011096  | MAP2K4_1574 | - | GTGACCTATGCACCAGACGTACAAATATCTGTTATTCTTATACATCTTAAATATCACCTTAGATCGGAAGAGCGGTTTCAG   |
| chr17 | 12013642  | 12013681  | MAP2K4_1575 | - | GTGACCTATGCACCAGACGTAAAGGAGAGATGGGATAAAACAAC TTGTTTCTTTTATTCAAGATCGGAAGAGCGGTTTCAG  |
| chr17 | 12016500  | 12016539  | MAP2K4_1576 | - | GTGACCTATGCACCAGACGTAGATATCATT CAGTATACAATTAGCTTCTTCTTAAGTTAAGATCGGAAGAGCGGTTTCAG   |
| chr17 | 12028561  | 12028600  | MAP2K4_1577 | - | GTGACCTATGCACCAGACGTAAAGACAAGTGTAAAGTTATTAATGCCTTACACTCAAGGAAAGATCGGAAGAGCGGTTTCAG  |
| chr17 | 12032406  | 12032445  | MAP2K4_1578 | - | GTGACCTATGCACCAGACGTCAAAGGAAAGGACAAAATACACCAGGCATCATTACTAAGATCGGAAGAGCGGTTTCAG      |
| chr17 | 12043106  | 12043145  | MAP2K4_1579 | - | GTGACCTATGCACCAGACGTATAAAAAATAACATTATAAAGTGTAGATTCAATTTGCCTAAAAGATCGGAAGAGCGGTTTCAG |
| chr17 | 12044414  | 12044453  | MAP2K4_1580 | - | GTGACCTATGCACCAGACGTATTGAAAACAAAAAAGTCAAAGTTTGTATGACAGCCCAAAGATCGGAAGAGCGGTTTCAG    |
| chr22 | 39621678  | 39621717  | PDGFB_1581  | - | GTGACCTATGCACCAGACGTAGGAGAGTGTGTGGGCAGGTGAGGGCCAGGCGGGGCAACTAGATCGGAAGAGCGGTTTCAG   |
| chr22 | 39626039  | 39626078  | PDGFB_1582  | - | GTGACCTATGCACCAGACGTTTCCAGGCTCAGCCCTCAGCCCTTCCCTGCAGCAGCTAGATCGGAAGAGCGGTTTCAG      |
| chr22 | 39627577  | 39627616  | PDGFB_1583  | - | GTGACCTATGCACCAGACGTCCGCGGCCCCCGAGGCTGGTCCCGGTTGGTGGGTTGGAGAAGATCGGAAGAGCGGTTTCAG   |
| chr22 | 39629429  | 39629468  | PDGFB_1584  | - | GTGACCTATGCACCAGACGTGACGCCCAACAGGTCCTTCAAATAGCATGGGGCCAGAGATCGGAAGAGCGGTTTCAG       |
| chr22 | 39631733  | 39631772  | PDGFB_1585  | - | GTGACCTATGCACCAGACGTTCTCCGCCCCGCGCTCCGCCCCCTCCGAGGAGACTTTAAGAAGATCGGAAGAGCGGTTTCAG  |
| chr22 | 39636810  | 39636849  | PDGFB_1586  | - | GTGACCTATGCACCAGACGTCTCCACGCTTGTCTTCCCTCCCCACATTGAGGAGCCTCAGATCGGAAGAGCGGTTTCAG     |
| chr22 | 39639856  | 39639895  | PDGFB_1587  | - | GTGACCTATGCACCAGACGTACGGCGGCTGGGGCTGGTTCTTCAATCATTACCTTCCGCCAGATCGGAAGAGCGGTTTCAG   |
| chr3  | 30648326  | 30648365  | TGFBR2_1588 | - | GTGACCTATGCACCAGACGTGCTGCTCGTATAGACCGAGCCCCAGCGCAGCGGACGGCAGATCGGAAGAGCGGTTTCAG     |
| chr3  | 30686189  | 30686228  | TGFBR2_1589 | - | GTGACCTATGCACCAGACGTAGAAAATATATAATTAATGATTCCAAGTCCAGGCCAGCCAGATCGGAAGAGCGGTTTCAG    |
| chr3  | 30691712  | 30691751  | TGFBR2_1590 | - | GTGACCTATGCACCAGACGTAGAAATCTTGAAGCGGAGGGGAGGAGAGAGAAAAGATCGGAAGAGCGGTTTCAG          |
| chr3  | 30713080  | 30713119  | TGFBR2_1591 | - | GTGACCTATGCACCAGACGTACAAAAACAAGGAGAGAAGGAGTTGGATGTGGTAGGTAAGAGATCGGAAGAGCGGTTTCAG   |
| chr3  | 30715547  | 30715586  | TGFBR2_1592 | - | GTGACCTATGCACCAGACGTAAACAGACAGTGAGGCCCATCATTTAATCCAGCTGCCTTTAGATCGGAAGAGCGGTTTCAG   |
| chr3  | 30729826  | 30729865  | TGFBR2_1593 | - | GTGACCTATGCACCAGACGTAGCCAGCAAACACAGGGTCACTGAGAATGGCATGTGCAGCAGATCGGAAGAGCGGTTTCAG   |
| chr3  | 30732862  | 30732901  | TGFBR2_1594 | - | GTGACCTATGCACCAGACGTAAAGATAAAAGGCCACCATGAGTTGGTGGGCTCCGCGAGATCGGAAGAGCGGTTTCAG      |
| chr3  | 30713480  | 30713519  | TGFBR2_1595 | - | GTGACCTATGCACCAGACGTATAGGAAAGATCTTGACTGCCACTGTCTCAAACCTCAGATCGGAAGAGCGGTTTCAG       |
| chr7  | 98478724  | 98478763  | TRRAP_1596  | - | GTGACCTATGCACCAGACGTGGCTGGTTTGCCTTCTCAAGAGAAAAGTATCAGGTTCCATGAAGATCGGAAGAGCGGTTTCAG |
| chr7  | 98479548  | 98479587  | TRRAP_1597  | - | GTGACCTATGCACCAGACGTCAAAAACAAGCATCAGGTAATTGAAATTATGTTAAGGAAATAGATCGGAAGAGCGGTTTCAG  |
| chr7  | 98487908  | 98487947  | TRRAP_1598  | - | GTGACCTATGCACCAGACGTAAAAATAAAGACCCCATTCAGTTATGTGTATGTTATTTTCAGATCGGAAGAGCGGTTTCAG   |
| chr7  | 98489997  | 98490036  | TRRAP_1599  | - | GTGACCTATGCACCAGACGTAAAAATAAATGAATGATAAAAAATACTTCCAAGGGTTAGATCGGAAGAGCGGTTTCAG      |
| chr7  | 98491371  | 98491410  | TRRAP_1600  | - | GTGACCTATGCACCAGACGTCTAATTAAGTAAATCTGAAAGTCTGAAGACTCACTTTAAAAGATCGGAAGAGCGGTTTCAG   |
| chr7  | 98493337  | 98493376  | TRRAP_1601  | - | GTGACCTATGCACCAGACGTGCAGACACTTTTCTGTTATAGGAAGATTCATAAAACAGAAAAGATCGGAAGAGCGGTTTCAG  |
| chr7  | 98495314  | 98495353  | TRRAP_1602  | - | GTGACCTATGCACCAGACGTGCATAAAAAATATTTTTCTTAAAGTCAAACCCAATATTAGATCGGAAGAGCGGTTTCAG     |
| chr7  | 98496995  | 98497034  | TRRAP_1603  | - | GTGACCTATGCACCAGACGTGAAATGGTAGGACCCGGTTACCATTGTGGCATTAAAAAGATCGGAAGAGCGGTTTCAG      |
| chr7  | 98497252  | 98497291  | TRRAP_1604  | - | GTGACCTATGCACCAGACGTACATACCAGATTTTTCATACATTGACACTCTGCTATGGCGAAGATCGGAAGAGCGGTTTCAG  |
| chr7  | 98498197  | 98498236  | TRRAP_1605  | - | GTGACCTATGCACCAGACGTAGAGAACAATAATACCTCTCAATTATGAGTGATGTTAAGATCGGAAGAGCGGTTTCAG      |
| chr7  | 98500952  | 98500991  | TRRAP_1606  | - | GTGACCTATGCACCAGACGTAGAGTGAGATGACACAGTACAGGGATAGGAGAGTGTTAAAGATCGGAAGAGCGGTTTCAG    |
| chr7  | 98503750  | 98503789  | TRRAP_1607  | - | GTGACCTATGCACCAGACGTAAACATCCATTGCACAGATCACTAAACAAAACCAATTACACAAGATCGGAAGAGCGGTTTCAG |
| chr7  | 98506301  | 98506340  | TRRAP_1608  | - | GTGACCTATGCACCAGACGTAGACCTCGACTAGTGCTCATTCCCACGTGGCCATGCCTGCAGATCGGAAGAGCGGTTTCAG   |
| chr7  | 98507629  | 98507668  | TRRAP_1609  | - | GTGACCTATGCACCAGACGTGAGAAATCAAGAGGGAAGACAGAATTATCTTCTTCAACAGATCGGAAGAGCGGTTTCAG     |
| chr7  | 98508083  | 98508122  | TRRAP_1610  | - | GTGACCTATGCACCAGACGTGAAAGTATATTAAGTTAACTTGAATAAAAACCTCACTTTATGAGATCGGAAGAGCGGTTTCAG |
| chr7  | 98508650  | 98508689  | TRRAP_1611  | - | GTGACCTATGCACCAGACGTGGAAAAAGCCGCCACAGGCATAAAAACCTCACTCTCTAGATCGGAAGAGCGGTTTCAG      |
| chr7  | 98509595  | 98509634  | TRRAP_1612  | - | GTGACCTATGCACCAGACGTAGAAAACACATGTGAAAATAATCCCTTCCCAAAGCAGAGATCGGAAGAGCGGTTTCAG      |
| chr7  | 98513296  | 98513335  | TRRAP_1613  | - | GTGACCTATGCACCAGACGTGAGAAGACGCAGATTAAGTGGCATCTAAATGAGGAGGGTCTAGATCGGAAGAGCGGTTTCAG  |
| chr7  | 98514996  | 98515035  | TRRAP_1614  | - | GTGACCTATGCACCAGACGTGGGTGCAGCTATCAGAGAGGGAAGACGCTCCCCAGACTCGAGATCGGAAGAGCGGTTTCAG   |
| chr7  | 98519326  | 98519365  | TRRAP_1615  | - | GTGACCTATGCACCAGACGTGCGTGCTTTTCAATTAAGTCTCTTAAAGTAAATGCCTTACAGATCGGAAGAGCGGTTTCAG   |
| chr7  | 98522685  | 98522724  | TRRAP_1616  | - | GTGACCTATGCACCAGACGTGACACAAAAGAACTACAGTTTGTGCTGAAATTACATGATTAGATCGGAAGAGCGGTTTCAG   |
| chr7  | 98524740  | 98524779  | TRRAP_1617  | - | GTGACCTATGCACCAGACGTAAATCAGATCTGGTGTACAGACACCCACTCTCTGAGCTGAAGATCGGAAGAGCGGTTTCAG   |
| chr7  | 98527562  | 98527601  | TRRAP_1618  | - | GTGACCTATGCACCAGACGTAGATGGGAAGGCAGTGCAGACACTCTTCCCTCAAACATGATCGGAAGAGCGGTTTCAG      |
| chr7  | 98528978  | 98529017  | TRRAP_1619  | - | GTGACCTATGCACCAGACGTGGGATGTCTTAGAATGAAAGCAGGGCGATGCCACCCACTGAGATCGGAAGAGCGGTTTCAG   |
| chr7  | 98530814  | 98530853  | TRRAP_1620  | - | GTGACCTATGCACCAGACGTCAAGGAGGAGGCCACTCACCAGCTGCCCTTGTAGACACAGATCGGAAGAGCGGTTTCAG     |
| chr7  | 98533152  | 98533191  | TRRAP_1621  | - | GTGACCTATGCACCAGACGTAAAAACAATTTCAATTTAGCCACTCTTCTGTGAAGACATAGATCGGAAGAGCGGTTTCAG    |
| chr7  | 98534729  | 98534768  | TRRAP_1622  | - | GTGACCTATGCACCAGACGTAGAAATCAAGACAATTCATTTAACTGGAAGATGCCAGATCGGAAGAGCGGTTTCAG        |
| chr7  | 98535223  | 98535262  | TRRAP_1623  | - | GTGACCTATGCACCAGACGTAGAAAAGTTGTAAGAAAATAAGCAACTGAGGACATTCAGATCGGAAGAGCGGTTTCAG      |
| chr7  | 98540522  | 98540561  | TRRAP_1624  | - | GTGACCTATGCACCAGACGTACACATCTCTGAGACACAACTTCAAGTAGGTCATTCCAAGATCGGAAGAGCGGTTTCAG     |

|      |           |           |            |   |                                                                                     |
|------|-----------|-----------|------------|---|-------------------------------------------------------------------------------------|
| chr7 | 98545794  | 98545833  | TRRAP_1625 | - | GTGACCTATGCACCAGACGTAAACCAGAAATTATAAACAGGTCGATTAATTTTGAAGTGAGATCGGAAGAGCGGTTTCAG    |
| chr7 | 98546139  | 98546178  | TRRAP_1626 | - | GTGACCTATGCACCAGACGTTGTGGGAATGCTGCATCTCACAACTTCCTCTTCTCAGAGCAGATCGGAAGAGCGGTTTCAG   |
| chr7 | 98546990  | 98547029  | TRRAP_1627 | - | GTGACCTATGCACCAGACGTAAACAAATAGAAAAGCCGTTTTAAGCTAATCAAACCTCACAGAGATCGGAAGAGCGGTTTCAG |
| chr7 | 98547233  | 98547272  | TRRAP_1628 | - | GTGACCTATGCACCAGACGTAGAGATAATTAGGGAACCGTGTCTCGATTAACCCCTGGGAGATCGGAAGAGCGGTTTCAG    |
| chr7 | 98547637  | 98547676  | TRRAP_1629 | - | GTGACCTATGCACCAGACGTAAAAGAAAGACAGGTTAACTTAGAGCAAATTTCAATAAAGATCGGAAGAGCGGTTTCAG     |
| chr7 | 98548449  | 98548488  | TRRAP_1630 | - | GTGACCTATGCACCAGACGTAATTTAAATAAAGAAAGGAGAAAACAAAGCCATGCTGTTTAGATCGGAAGAGCGGTTTCAG   |
| chr7 | 98550740  | 98550779  | TRRAP_1631 | - | GTGACCTATGCACCAGACGTACAGCAGGAAGGACTCATTTCCAGTTGTGAACCTGGGTTACAGATCGGAAGAGCGGTTTCAG  |
| chr7 | 98552671  | 98552710  | TRRAP_1632 | - | GTGACCTATGCACCAGACGTGAAGAGACGTTTATGGAGGATGAGAAGGAAGGCTTTAAGAAGATCGGAAGAGCGGTTTCAG   |
| chr7 | 98553719  | 98553758  | TRRAP_1633 | - | GTGACCTATGCACCAGACGTAGGGCCAGCATCACGCCGGAACATGGGAGCTTGGTCCCACAGATCGGAAGAGCGGTTTCAG   |
| chr7 | 98553972  | 98554011  | TRRAP_1634 | - | GTGACCTATGCACCAGACGTACAGGGCGCTTGGTTTTACTGACTGATTTCTAGGGAGAAGAGATCGGAAGAGCGGTTTCAG   |
| chr7 | 98555554  | 98555593  | TRRAP_1635 | - | GTGACCTATGCACCAGACGTACCTCCTTTTCAGGCAGGAAGAGAATCGCAACACTAATTTTCAGATCGGAAGAGCGGTTTCAG |
| chr7 | 98556917  | 98556956  | TRRAP_1636 | - | GTGACCTATGCACCAGACGTATCCGAGTTACAGCCGGCCTTTCACTGCATCCGAGTTTACAGATCGGAAGAGCGGTTTCAG   |
| chr7 | 98558834  | 98558873  | TRRAP_1637 | - | GTGACCTATGCACCAGACGTCAAACACAGGCCACTCACAGAGGAAACAAACACTCAATGACAGATCGGAAGAGCGGTTTCAG  |
| chr7 | 98559875  | 98559914  | TRRAP_1638 | - | GTGACCTATGCACCAGACGTGCAGGGACCCAGGCACTGTGGTTATGGCTCTTGGGCCACAGATCGGAAGAGCGGTTTCAG    |
| chr7 | 98562202  | 98562241  | TRRAP_1639 | - | GTGACCTATGCACCAGACGTGAAATTGCCAAGTGTTCACAGAAAAGTAACAACCACGAAAGATCGGAAGAGCGGTTTCAG    |
| chr7 | 98563269  | 98563308  | TRRAP_1640 | - | GTGACCTATGCACCAGACGTCAATTAAGAACAACCCACGGGCTCTAAACGTTGATTTAAGATCGGAAGAGCGGTTTCAG     |
| chr7 | 98564614  | 98564653  | TRRAP_1641 | - | GTGACCTATGCACCAGACGTTTTTGAAAAAGACGCAGTTAAAGTATTTCAACCATCTGCAGATCGGAAGAGCGGTTTCAG    |
| chr7 | 98565058  | 98565097  | TRRAP_1642 | - | GTGACCTATGCACCAGACGTAAAGTACAGACAGGCAAGAGGACTGCCACTCCCAAGTCAAGATCGGAAGAGCGGTTTCAG    |
| chr7 | 98567685  | 98567724  | TRRAP_1643 | - | GTGACCTATGCACCAGACGTTGCGGAAAGGAGACAGACCCAAGGCATGCGCGTGGCATTTCAGATCGGAAGAGCGGTTTCAG  |
| chr7 | 98569372  | 98569411  | TRRAP_1644 | - | GTGACCTATGCACCAGACGTAAAGCAGCAAGCAAAACCAAAGGTCAAAGGCTTCAAGAAAAGATCGGAAGAGCGGTTTCAG   |
| chr7 | 98573722  | 98573761  | TRRAP_1645 | - | GTGACCTATGCACCAGACGTAAAGACAACAGGCTGAGATGGCCACGGGCTGGGGGTGCCTAGATCGGAAGAGCGGTTTCAG   |
| chr7 | 98574056  | 98574095  | TRRAP_1646 | - | GTGACCTATGCACCAGACGTAGCAATGTCTTTAGCCCTTCAATCAAATAATCGGCAAGTAGATCGGAAGAGCGGTTTCAG    |
| chr7 | 98574512  | 98574551  | TRRAP_1647 | - | GTGACCTATGCACCAGACGTAAAGTAAGTCTCTGAGTGTCTTGAGACAGAGACTTTTTTTAGATCGGAAGAGCGGTTTCAG   |
| chr7 | 98575784  | 98575823  | TRRAP_1648 | - | GTGACCTATGCACCAGACGTTAATGTTTTTAAATGACTGTTTAACTAGAACAACACCTTAGATCGGAAGAGCGGTTTCAG    |
| chr7 | 98576342  | 98576381  | TRRAP_1649 | - | GTGACCTATGCACCAGACGTACAGATCCAGAGCAAAAGCTCAATCACCAGCACACTCATAGATCGGAAGAGCGGTTTCAG    |
| chr7 | 98579342  | 98579381  | TRRAP_1650 | - | GTGACCTATGCACCAGACGTAAAGACGTGACACAGGACGTGAGGGGCTTCTTTCCCTCAAGATCGGAAGAGCGGTTTCAG    |
| chr7 | 98580837  | 98580876  | TRRAP_1651 | - | GTGACCTATGCACCAGACGTGAGCATAAGAGACTCTGCGGTAATGTGAGTAAGATCAAAGATCGGAAGAGCGGTTTCAG     |
| chr7 | 98581666  | 98581705  | TRRAP_1652 | - | GTGACCTATGCACCAGACGTAAAGAAAGGAATCATTAGCCCAACCCGATCCTCTTTCAAAGAGATCGGAAGAGCGGTTTCAG  |
| chr7 | 98582517  | 98582556  | TRRAP_1653 | - | GTGACCTATGCACCAGACGTAAATGAGCAGAAAAAAGTTCTTGAATTTCTAAACAATAGATCGGAAGAGCGGTTTCAG      |
| chr7 | 98588028  | 98588067  | TRRAP_1654 | - | GTGACCTATGCACCAGACGTAGGAGAAATCTAGAGTAGAATGACAATTTCTGAAGCCCTAGATCGGAAGAGCGGTTTCAG    |
| chr7 | 98589710  | 98589749  | TRRAP_1655 | - | GTGACCTATGCACCAGACGTACAAGATGTTATAACAGTGTCTGCTCTGCTGAGCTCTGAGATCGGAAGAGCGGTTTCAG     |
| chr7 | 98591165  | 98591204  | TRRAP_1656 | - | GTGACCTATGCACCAGACGTATGGGACTGGTTACCCACTGAACCTTGGCTGCTGCTGCTCAAGATCGGAAGAGCGGTTTCAG  |
| chr7 | 98592160  | 98592199  | TRRAP_1657 | - | GTGACCTATGCACCAGACGTAGAGCCAGACAACTGACAAACACAGCCCTCCACTCCAGATCGGAAGAGCGGTTTCAG       |
| chr7 | 98601763  | 98601802  | TRRAP_1658 | - | GTGACCTATGCACCAGACGTAAACATGATTAACAAAGCTTTTATGTCATCTGGGCCAGTTTCAGATCGGAAGAGCGGTTTCAG |
| chr7 | 98602704  | 98602743  | TRRAP_1659 | - | GTGACCTATGCACCAGACGTGAGAAGCCATGAGGACATGCCCTGACATCTCTGCTAGCATTAGATCGGAAGAGCGGTTTCAG  |
| chr7 | 98605950  | 98605989  | TRRAP_1660 | - | GTGACCTATGCACCAGACGTAGGAAGAGAAACGGGGCAGGCTGAGGGTGACCGCGGGCCAAGATCGGAAGAGCGGTTTCAG   |
| chr7 | 98608625  | 98608664  | TRRAP_1661 | - | GTGACCTATGCACCAGACGTGCGCTCCGTGACACTCCCATCTCACTCACTGATTTTTTTTAGATCGGAAGAGCGGTTTCAG   |
| chr7 | 98608914  | 98608953  | TRRAP_1662 | - | GTGACCTATGCACCAGACGTGAAGGAGACACTTTAGGAACCTCAGCAGAAAGGCGATGTCAGATCGGAAGAGCGGTTTCAG   |
| chr7 | 98609644  | 98609683  | TRRAP_1663 | - | GTGACCTATGCACCAGACGTGAGAGAACGAGACGACTTGTGTTTAAACCAAGAACAGCCCAAGATCGGAAGAGCGGTTTCAG  |
| chr4 | 110834442 | 110834481 | EGF_1664   | - | GTGACCTATGCACCAGACGTAGTTTGAACTTTCAAAGAAAACAGCTTGATTTTGTGGAAGATCGGAAGAGCGGTTTCAG     |
| chr4 | 110862052 | 110862091 | EGF_1665   | - | GTGACCTATGCACCAGACGTGAAAGAGACCAAACCTGATATACTTTAATATTTTATCTCAAGATCGGAAGAGCGGTTTCAG   |
| chr4 | 110864360 | 110864399 | EGF_1666   | - | GTGACCTATGCACCAGACGTAAATTTTAAATTTGTTATTAATACCTCCCCATTCAACAACAGATCGGAAGAGCGGTTTCAG   |
| chr4 | 110864948 | 110864987 | EGF_1667   | - | GTGACCTATGCACCAGACGTACACATTACATAGACCCAAAATGAATGTATAGTGCCTTAAGATCGGAAGAGCGGTTTCAG    |
| chr4 | 110866179 | 110866218 | EGF_1668   | - | GTGACCTATGCACCAGACGTACCACAAAAGAAAAGAAACAAGAACATTTGTTCCCTTGAAGATCGGAAGAGCGGTTTCAG    |
| chr4 | 110880418 | 110880457 | EGF_1669   | - | GTGACCTATGCACCAGACGTAGATGCTTTATTTGGAGTGGGGCCGCTTTTTGACAGAGGAAGATCGGAAGAGCGGTTTCAG   |
| chr4 | 110881973 | 110882012 | EGF_1670   | - | GTGACCTATGCACCAGACGTACAAACAGCAATACATTCAAATGGCTATTTTTTGAATAAAGATCGGAAGAGCGGTTTCAG    |
| chr4 | 110882969 | 110883008 | EGF_1671   | - | GTGACCTATGCACCAGACGTAAAGAAACAGGTCAGATGATGTTAAATCGGGTTTGCAAAAGATCGGAAGAGCGGTTTCAG    |
| chr4 | 110884279 | 110884318 | EGF_1672   | - | GTGACCTATGCACCAGACGTAAATGCTTAGTAATGATGCTACGTCATCCAAAATAAATAGATCGGAAGAGCGGTTTCAG     |
| chr4 | 110885507 | 110885546 | EGF_1673   | - | GTGACCTATGCACCAGACGTAAATTTCAAATATGGCTGAATTTAAAACGTGCTTAGAAACAGATCGGAAGAGCGGTTTCAG   |
| chr4 | 110890077 | 110890116 | EGF_1674   | - | GTGACCTATGCACCAGACGTGAACACAGGCAATTTCTGATTTTTTTTTAAAACATATGTGGAGATCGGAAGAGCGGTTTCAG  |
| chr4 | 110895809 | 110895848 | EGF_1675   | - | GTGACCTATGCACCAGACGTTGCAAAAATAGGGAGTTTGTATAACACCTTTACTTTTCAAGATCGGAAGAGCGGTTTCAG    |
| chr4 | 110897118 | 110897157 | EGF_1676   | - | GTGACCTATGCACCAGACGTGAAAGCACACAAAATAATATCTGCATGAAATAAATATAGATCGGAAGAGCGGTTTCAG      |
| chr4 | 110901078 | 110901117 | EGF_1677   | - | GTGACCTATGCACCAGACGTTTTCAAGTTTGTAAATACACCTTCTTTGCTTTTGAATGAAGATCGGAAGAGCGGTTTCAG    |
| chr4 | 110901932 | 110901971 | EGF_1678   | - | GTGACCTATGCACCAGACGTAAAGAAAACAAATTCACAAGTGGGTTTGAAGATGAAAAGGAAGATCGGAAGAGCGGTTTCAG  |
| chr4 | 110904528 | 110904567 | EGF_1679   | - | GTGACCTATGCACCAGACGTTCAATAGATGCAATTAATTTAGCTTTTTCTGTTTCAAAAAGATCGGAAGAGCGGTTTCAG    |
| chr4 | 110908850 | 110908889 | EGF_1680   | - | GTGACCTATGCACCAGACGTCAAGAATCCCGTGCAGTTATTTCTAGACCTTAGAGAAGAAAGATCGGAAGAGCGGTTTCAG   |
| chr4 | 110909690 | 110909729 | EGF_1681   | - | GTGACCTATGCACCAGACGTAAATGAACTAGTGCATATTTAGGCACTTATGATATAAAGATCGGAAGAGCGGTTTCAG      |
| chr4 | 110914353 | 110914392 | EGF_1682   | - | GTGACCTATGCACCAGACGTAGACAGAGTACGGGAGAGAAAAGTGGGGTACAGAAAAGAAAGATCGGAAGAGCGGTTTCAG   |

|       |           |           |           |   |                                                                                       |
|-------|-----------|-----------|-----------|---|---------------------------------------------------------------------------------------|
| chr4  | 110915839 | 110915878 | EGF_1683  | - | GTGACCTATGCACCAGACGTCCAAGACATTACTTTTACTTTCTGAATGGATTAGTGTCTTAGATCGGAAGAGCGGTTTCAG     |
| chr4  | 110920785 | 110920824 | EGF_1684  | - | GTGACCTATGCACCAGACGTACACAAAACAGAGGTCATCAGAGATGCCTGGCCAAAAACGCAGATCGGAAGAGCGGTTTCAG    |
| chr4  | 110925611 | 110925650 | EGF_1685  | - | GTGACCTATGCACCAGACGTGCCAAAATTTGAGACAATCTCACAAAACAAAATACTCAGATCGGAAGAGCGGTTTCAG        |
| chr4  | 110929258 | 110929297 | EGF_1686  | - | GTGACCTATGCACCAGACGTCAAAAAGGAGGGAGAGAGGATATTGTTAAAATTCACAATAGATCGGAAGAGCGGTTTCAG      |
| chr4  | 110932308 | 110932347 | EGF_1687  | - | GTGACCTATGCACCAGACGTGACAAAAGAAATTTCAATATTTCATATCATTAAACAATAGATAGATCGGAAGAGCGGTTTCAG   |
| chr13 | 28578139  | 28578178  | FLT3_1688 | - | GTGACCTATGCACCAGCGTTAGTTTTAAGGACTTACCTCCACCTATCCCTAACAGGAGATCGGAAGAGCGGTTTCAG         |
| chr13 | 28588578  | 28588578  | FLT3_1689 | - | GTGACCTATGCACCAGACGTGCCAGACTTTATAAAGAGCTTTACAAAAGAAATTTGGTAAATAGATCGGAAGAGCGGTTTCAG   |
| chr13 | 28589244  | 28589283  | FLT3_1690 | - | GTGACCTATGCACCAGACGTGTCAGACTGTAATTTGGTTGAAATCAGAAAAGGTACAGTCTAGATCGGAAGAGCGGTTTCAG    |
| chr13 | 28589677  | 28589716  | FLT3_1691 | - | GTGACCTATGCACCAGACGTGCTGCTGGCCTCCCTGGCTCTGGCTTTGCATCCTCTAGATCGGAAGAGCGGTTTCAG         |
| chr13 | 28592554  | 28592593  | FLT3_1692 | - | GTGACCTATGCACCAGACGTATTTTCTACTTATTTTTATACGGCTATTTTGTGTTGTGTAGATCGGAAGAGCGGTTTCAG      |
| chr13 | 28597437  | 28597476  | FLT3_1693 | - | GTGACCTATGCACCAGACGTTTTAAAGAAAACAAAACAAAAGATTTGAAAAGATAGATCGGAAGAGCGGTTTCAG           |
| chr13 | 28598948  | 28598987  | FLT3_1694 | - | GTGACCTATGCACCAGACGTATTCTAAGTAGTAGCACTTTAAAATGAAATGAATGCAAAAAGATCGGAAGAGCGGTTTCAG     |
| chr13 | 28601175  | 28601214  | FLT3_1695 | - | GTGACCTATGCACCAGACGTGGGTACAGGTTTCGTAATTACACATCATAGAACGTAGGCAAGATCGGAAGAGCGGTTTCAG     |
| chr13 | 28602265  | 28602304  | FLT3_1696 | - | GTGACCTATGCACCAGACGTTCACGAAAATCACCTCATCAAAAAGACTGTAGCTTGATGAGATCGGAAGAGCGGTTTCAG      |
| chr13 | 28607974  | 28608013  | FLT3_1697 | - | GTGACCTATGCACCAGACGTGTTGGAAGGACAGCAACAAAGATGCACAAAATGGGAGGCAAGATCGGAAGAGCGGTTTCAG     |
| chr13 | 28608169  | 28608208  | FLT3_1698 | - | GTGACCTATGCACCAGACGTAAATGTGCCAAATGTTTCTGCAGCATTCTTTTCCATTGGAAGATCGGAAGAGCGGTTTCAG     |
| chr13 | 28608388  | 28608427  | FLT3_1699 | - | GTGACCTATGCACCAGACGTAGGTAAAATTCATTATTTCTTCTCTATCTGCCAAGTCTGAGATCGGAAGAGCGGTTTCAG      |
| chr13 | 28609582  | 28609621  | FLT3_1700 | - | GTGACCTATGCACCAGACGTGTTCTTGATATTCACCATCAGAAATCCCCACTAGAAAGATCGGAAGAGCGGTTTCAG         |
| chr13 | 28610022  | 28610061  | FLT3_1701 | - | GTGACCTATGCACCAGACGTCAATGATGCCTCTTATAATGGAAGAACATAAACTCTCTGAGATCGGAAGAGCGGTTTCAG      |
| chr13 | 28611272  | 28611311  | FLT3_1702 | - | GTGACCTATGCACCAGACGTGGCCGAGAATTTGATTTTTATTTTTAATTTCTTAATTTAGATCGGAAGAGCGGTTTCAG       |
| chr13 | 28622362  | 28622401  | FLT3_1703 | - | GTGACCTATGCACCAGACGTAAAGGACTCTAAGATACCATTTTTAGCATAATTTCTCTTGAGATCGGAAGAGCGGTTTCAG     |
| chr13 | 28623471  | 28623510  | FLT3_1704 | - | GTGACCTATGCACCAGACGTCTGCTCACACAATCTTTATTTCTTATTTAGTCGCTGTAGAGATCGGAAGAGCGGTTTCAG      |
| chr13 | 28623722  | 28623761  | FLT3_1705 | - | GTGACCTATGCACCAGACGTAAGTTTGATTTCTGAAAATCGAGAAACAATACTAATAGAGATCGGAAGAGCGGTTTCAG       |
| chr13 | 28624182  | 28624221  | FLT3_1706 | - | GTGACCTATGCACCAGACGTGAATATCACTACTTTTCAATTTAGTACCGGTTCTTAGCAAGATCGGAAGAGCGGTTTCAG      |
| chr13 | 28626632  | 28626671  | FLT3_1707 | - | GTGACCTATGCACCAGACGTTCATGTTGAGTCTATTCTCATAATTTCTTTTGGCCTTAGATCGGAAGAGCGGTTTCAG        |
| chr13 | 28631434  | 28631473  | FLT3_1708 | - | GTGACCTATGCACCAGACGTCTGCTACTAGTATTCCAGCCTGGAATACCACAATTTTCAGATCGGAAGAGCGGTTTCAG       |
| chr13 | 28635954  | 28635993  | FLT3_1709 | - | GTGACCTATGCACCAGACGTGAATACCTTCTTGACATAAAATGTGGTTCATTTGGAATTTAGATCGGAAGAGCGGTTTCAG     |
| chr13 | 28644578  | 28644617  | FLT3_1710 | - | GTGACCTATGCACCAGACGTATTAATAATACCTTTAGCTGTTTTTCTCTAGAGAAGTCTAGATCGGAAGAGCGGTTTCAG      |
| chr13 | 28674555  | 28674594  | FLT3_1711 | - | GTGACCTATGCACCAGACGTGCTGCTCGCTCGCAGCCCTCGCGTCCCTCAGCCCCAAGATCGGAAGAGCGGTTTCAG         |
| chr17 | 73316399  | 73316438  | GRB2_1712 | - | GTGACCTATGCACCAGACGTGCAATTTAAAGAAAAGTAAAATGTAATAACACATACAAGATCGGAAGAGCGGTTTCAG        |
| chr17 | 73317690  | 73317729  | GRB2_1713 | - | GTGACCTATGCACCAGACGTTCAAGGTTGAGATGGGATCATTTTTAGTTAAGAATAGCTCCAGATCGGAAGAGCGGTTTCAG    |
| chr17 | 73321929  | 73321968  | GRB2_1714 | - | GTGACCTATGCACCAGACGTCTGCTGTCAGTTGCCGTGGAATCCTGTCTCTGACTGATCCAAGATCGGAAGAGCGGTTTCAG    |
| chr17 | 73328731  | 73328770  | GRB2_1715 | - | GTGACCTATGCACCAGACGTCTCCATTAGTCTTGAAGGGTTGGACCCACCTCTGTTTAGATCGGAAGAGCGGTTTCAG        |
| chr17 | 73389582  | 73389621  | GRB2_1716 | - | GTGACCTATGCACCAGACGTATGCCGAGCAATGCTGAGATCGCTCTCCCTGTGCTCACAGATCGGAAGAGCGGTTTCAG       |
| chr17 | 26084222  | 26084261  | NOS2_1717 | - | GTGACCTATGCACCAGACGTGAGGGTTAAAGCTGCCGCGCACGAACATAAGGATGGAGATCGGAAGAGCGGTTTCAG         |
| chr17 | 26085857  | 26085896  | NOS2_1718 | - | GTGACCTATGCACCAGACGTGGGTGTGTGGGCTGAAGGTGCCGGCCAAGGGCACAGGCCGAGATCGGAAGAGCGGTTTCAG     |
| chr17 | 26087006  | 26087045  | NOS2_1719 | - | GTGACCTATGCACCAGACGTCTCAAAGCAGGTGAAGCATTACACACAAGCTCCACTGAGATCGGAAGAGCGGTTTCAG        |
| chr17 | 26087599  | 26087638  | NOS2_1720 | - | GTGACCTATGCACCAGACGTAGGGTCTCCAGGTGGGAGGGGCCACCAGGGGCCAGCCCTAGATCGGAAGAGCGGTTTCAG      |
| chr17 | 26088120  | 26088159  | NOS2_1721 | - | GTGACCTATGCACCAGACGTCTCCACTCTGTCCCCTGTGGGGCCGCCACCCTGGGAGAGATCGGAAGAGCGGTTTCAG        |
| chr17 | 26089774  | 26089813  | NOS2_1722 | - | GTGACCTATGCACCAGACGTGGCAGAGGCTTGAACAGCCCCGCTCCGCCATTTAGGATCGGAAGAGCGGTTTCAG           |
| chr17 | 26090957  | 26090996  | NOS2_1723 | - | GTGACCTATGCACCAGACGTGGGCTGGTGGGCTGAGGGGATGTTGGGGGTCCCAGCATAGATCGGAAGAGCGGTTTCAG       |
| chr17 | 26092511  | 26092550  | NOS2_1724 | - | GTGACCTATGCACCAGACGTGGCTAGAAAAGCCAGTGTGCTGCCGTTGCCACCCTCTGGCCGCCAGATCGGAAGAGCGGTTTCAG |
| chr17 | 26093486  | 26093525  | NOS2_1725 | - | GTGACCTATGCACCAGACGTGTGCAGGGCTTCGTGGGTGATACTCTGTCGATTTTATTTTAGATCGGAAGAGCGGTTTCAG     |
| chr17 | 26094681  | 26094720  | NOS2_1726 | - | GTGACCTATGCACCAGACGTCTCTGCAGCACATGGGGCTTGTGTTGTTGGGGTCTGAGCAGATCGGAAGAGCGGTTTCAG      |
| chr17 | 26095953  | 26095992  | NOS2_1727 | - | GTGACCTATGCACCAGACGTAGCCAGAGCTGCCCCACAGCAGGGGACATGACAGGGTGCATAGATCGGAAGAGCGGTTTCAG    |
| chr17 | 26096511  | 26096550  | NOS2_1728 | - | GTGACCTATGCACCAGACGTTCCGTTGCTACTCTGACCTGCCCCTGTGGACCCAAAAGATCGGAAGAGCGGTTTCAG         |
| chr17 | 26097889  | 26097928  | NOS2_1729 | - | GTGACCTATGCACCAGACGTTGAGGTGTGGCTGGTCTAGGGGGTGGTAGGGCACGGGAGGAGATCGGAAGAGCGGTTTCAG     |
| chr17 | 26099284  | 26099323  | NOS2_1730 | - | GTGACCTATGCACCAGACGTAGTGGGATGGCTGTTGTTTTTCTGCTTGTGTGCAGGGGAAGATCGGAAGAGCGGTTTCAG      |
| chr17 | 26100137  | 26100176  | NOS2_1731 | - | GTGACCTATGCACCAGACGTGTGGCAGTGGCTAGTAGTGATGTGTGAACATATCTCTCCAGATCGGAAGAGCGGTTTCAG      |
| chr17 | 26101233  | 26101272  | NOS2_1732 | - | GTGACCTATGCACCAGACGTTTCTCTCTCTCTCTCCCTGGGGGCTCAGATGTGGCTGTAAGATCGGAAGAGCGGTTTCAG      |
| chr17 | 26105666  | 26105705  | NOS2_1733 | - | GTGACCTATGCACCAGACGTAGTTTTGTAGTCTGAAGACTTTTTGGTGAGAAGCTTAACAGATCGGAAGAGCGGTTTCAG      |
| chr17 | 26105858  | 26105897  | NOS2_1734 | - | GTGACCTATGCACCAGACGTGCTTCCAGCTGGCCAGTGAAGATGAAGGTGTGGGCTGGGGTGGAGATCGGAAGAGCGGTTTCAG  |
| chr17 | 26107743  | 26107782  | NOS2_1735 | - | GTGACCTATGCACCAGACGTTGAGGGTGTGGGGGCAAGGGCAGTCAACACACAGCCCTAGATCGGAAGAGCGGTTTCAG       |
| chr17 | 26108012  | 26108051  | NOS2_1736 | - | GTGACCTATGCACCAGACGTGAGCCTCAGCCACCGGCCATTTGGGGCGGGAGCCCCGTGGAGATCGGAAGAGCGGTTTCAG     |
| chr17 | 26108991  | 26109030  | NOS2_1737 | - | GTGACCTATGCACCAGACGTATTTCCAGGGCTGCAGAGGGCTTGCCTTGCCTGAGAATAGATCGGAAGAGCGGTTTCAG       |
| chr17 | 26109920  | 26109959  | NOS2_1738 | - | GTGACCTATGCACCAGACGTTTAGACTTGAGCGGGAGAGAGCTGGAGGGCGGCCAGCCCTAGATCGGAAGAGCGGTTTCAG     |
| chr17 | 26114654  | 26114693  | NOS2_1739 | - | GTGACCTATGCACCAGACGTCTCCAGGGTGCCTGACCTGACCTGCTCCCTCTCTGCTCAGATCGGAAGAGCGGTTTCAG       |
| chr17 | 26115785  | 26115824  | NOS2_1740 | - | GTGACCTATGCACCAGACGTGCTTCCAGGGAGAACCACCTTTGTCCAAAGCTGGTGAAGCAGATCGGAAGAGCGGTTTCAG     |

|       |           |           |             |   |                                                                                      |
|-------|-----------|-----------|-------------|---|--------------------------------------------------------------------------------------|
| chr17 | 26116580  | 26116619  | NOS2_1741   | - | GTGACCTATGCACCAGACGTACATGGGTGTGGGAAGCCCCCTTCTCCTGGTCCAGGCAAGATCGGAAGAGCGGTTTCAG      |
| chr17 | 26125676  | 26125715  | NOS2_1742   | - | GTGACCTATGCACCAGACGTCTGGGGGAACCTCCTGCTTGTCTCCTGGGCACCCATGCAGATCGGAAGAGCGGTTTCAG      |
| chr15 | 40453372  | 40453411  | BUB1B_1743  | - | GTGACCTATGCACCAGACGTTGGCTCAGGTCCTCGTCTGCTGCAGGCCTTCTCCTGGGAGATCGGAAGAGCGGTTTCAG      |
| chr15 | 40457204  | 40457243  | BUB1B_1744  | - | GTGACCTATGCACCAGACGTGGAAACAAATGTAATCTCATACCAACATTGACTATTATAAGATCGGAAGAGCGGTTTCAG     |
| chr15 | 40462213  | 40462252  | BUB1B_1745  | - | GTGACCTATGCACCAGACGTAAACAGAAAAAGTTAGCATATGCAATAGTGACAACAGCCAAAGATCGGAAGAGCGGTTTCAG   |
| chr15 | 40462688  | 40462727  | BUB1B_1746  | - | GTGACCTATGCACCAGACGTGGAAAAAGATAAGAACACATTTAAATTTAAACATGTACTTAGATCGGAAGAGCGGTTTCAG    |
| chr15 | 40468667  | 40468667  | BUB1B_1747  | - | GTGACCTATGCACCAGACGTAGTGTAAACAGTTAACCTTTCTACTACGTATTGAATGAGATCGGAAGAGCGGTTTCAG       |
| chr15 | 40475865  | 40475904  | BUB1B_1748  | - | GTGACCTATGCACCAGACGTAGAATGCACAACCTTTTGTAGTGGTGCACACTATTTTACCAAGATCGGAAGAGCGGTTTCAG   |
| chr15 | 40477316  | 40477355  | BUB1B_1749  | - | GTGACCTATGCACCAGACGTAAATATTTAAACCTCATGTAATGTTTCATTATTAACCTTAGATCGGAAGAGCGGTTTCAG     |
| chr15 | 40477702  | 40477741  | BUB1B_1750  | - | GTGACCTATGCACCAGACGTAGAAGAAAACTAAAATTTACCATAGTTTTATGTTCTCAGACAGATCGGAAGAGCGGTTTCAG   |
| chr15 | 40488696  | 40488735  | BUB1B_1751  | - | GTGACCTATGCACCAGACGTAAAATTTACTATTATTCATATGGGTCAAAAATAAAAAAATCAGATCGGAAGAGCGGTTTCAG   |
| chr15 | 40491766  | 40491805  | BUB1B_1752  | - | GTGACCTATGCACCAGACGTAAAAGTTGCTTGGAGTATTCTCTCATAGTAACCTATTTCAGATCGGAAGAGCGGTTTCAG     |
| chr15 | 40492395  | 40492434  | BUB1B_1753  | - | GTGACCTATGCACCAGACGTAAATAAACAAAAATCAATGTCCTCCATCCAGAAAATGCAGATCGGAAGAGCGGTTTCAG      |
| chr15 | 40493082  | 40493121  | BUB1B_1754  | - | GTGACCTATGCACCAGACGTACTTGTTTTAAATCATGTGCTCAATACCCACAGAAAGAACAGATCGGAAGAGCGGTTTCAG    |
| chr15 | 40494556  | 40494595  | BUB1B_1755  | - | GTGACCTATGCACCAGACGTAGAGACTAGATACATACTCTAGGAGTAAATGCTTTACTCTAGATCGGAAGAGCGGTTTCAG    |
| chr15 | 40494740  | 40494779  | BUB1B_1756  | - | GTGACCTATGCACCAGACGTACATACCTCACTTAGCAATTTTTTTCATAACAGTAACCCAGATCGGAAGAGCGGTTTCAG     |
| chr15 | 40498335  | 40498374  | BUB1B_1757  | - | GTGACCTATGCACCAGACGTGACCATATAAAGTTTAAAGTAAATTTTCAATACATGAAGAGATCGGAAGAGCGGTTTCAG     |
| chr15 | 40500788  | 40500827  | BUB1B_1758  | - | GTGACCTATGCACCAGACGTCAAAAATAAAGTTAATTTCTATAGGAATAATATATATCAACAGATCGGAAGAGCGGTTTCAG   |
| chr15 | 40501786  | 40501825  | BUB1B_1759  | - | GTGACCTATGCACCAGACGTGAGGGAAAGGTGAAAATATATACCAAAAAAACCTAATGAGATCGGAAGAGCGGTTTCAG      |
| chr15 | 40502261  | 40502300  | BUB1B_1760  | - | GTGACCTATGCACCAGACGTAGTTTGATTCCATTTAAAAATCACTGTGAACATATACAGCAGATCGGAAGAGCGGTTTCAG    |
| chr15 | 40505483  | 40505522  | BUB1B_1761  | - | GTGACCTATGCACCAGACGTAAAGGACAGAAAACCTCACTATTTTCTCAAGTTTGGCAGATCGAGATCGGAAGAGCGGTTTCAG |
| chr15 | 40509647  | 40509686  | BUB1B_1762  | - | GTGACCTATGCACCAGACGTATTTAAGAGAAGGAGATAATAAAAAATAGGCCATGAAAGAAAGATCGGAAGAGCGGTTTCAG   |
| chr15 | 40510607  | 40510646  | BUB1B_1763  | - | GTGACCTATGCACCAGACGTAAAAAGCACCATCAGCTAAAATAATCTCTGCCTTACCAAGATCGGAAGAGCGGTTTCAG      |
| chr15 | 40512715  | 40512754  | BUB1B_1764  | - | GTGACCTATGCACCAGACGTAAACCCATTTCCATCAAGATTAGCCATATGAAAATTTAGATCGGAAGAGCGGTTTCAG       |
| chr12 | 12870724  | 12870763  | CDKN1B_1765 | - | GTGACCTATGCACCAGACGTGGTCTGCACGACCCCTCTCTCGCACTCTCAAAAAAACAAAGATCGGAAGAGCGGTTTCAG     |
| chr12 | 12871709  | 12871748  | CDKN1B_1766 | - | GTGACCTATGCACCAGACGTGGGAAATTTTTAAAAAGAACACACAATCTTTATAGAAAAGATCGGAAGAGCGGTTTCAG      |
| chr1  | 68512241  | 68512280  | DIRAS3_1767 | - | GTGACCTATGCACCAGACGTAAAGAGCCAGCTCTTCTATCCTGTAGCGTGTAGAAAACAGATCGGAAGAGCGGTTTCAG      |
| chr1  | 68512586  | 68512625  | DIRAS3_1768 | - | GTGACCTATGCACCAGACGTCCAAGAAGGAAACCCCTGGAAGAGCTGAAGGCCCTTCTATGAAGATCGGAAGAGCGGTTTCAG  |
| chr19 | 2180662   | 2180701   | DOT1L_1769  | - | GTGACCTATGCACCAGACGTGAGAGAAAGTTTGAAGCAGGACCCATCTCCACCCCGTGAAGATCGGAAGAGCGGTTTCAG     |
| chr19 | 2189681   | 2189720   | DOT1L_1770  | - | GTGACCTATGCACCAGACGTCAAGGGAAGGCCCTGGTCTCGGGCAGGAGCCACCCGCAAGATCGGAAGAGCGGTTTCAG      |
| chr19 | 2190961   | 2191000   | DOT1L_1771  | - | GTGACCTATGCACCAGACGTAGGGTGGCCCGGCCATGTCACATAAACCTCACGGCCAGCAGATCGGAAGAGCGGTTTCAG     |
| chr19 | 2193638   | 2193677   | DOT1L_1772  | - | GTGACCTATGCACCAGACGTAGAGATCCATCAGATACCACACAGCGCTCAGATGCCACCAGATCGGAAGAGCGGTTTCAG     |
| chr19 | 2199833   | 2199872   | DOT1L_1773  | - | GTGACCTATGCACCAGACGTAAACAGGTTGAGCGCGGCCACCCCGGCCCTCCTGGCACTCAGATCGGAAGAGCGGTTTCAG    |
| chr19 | 2202648   | 2202688   | DOT1L_1774  | - | GTGACCTATGCACCAGACGTATACCTCAGTCCATGAGGCTCGTCTCACGGGCAAGATCGGAAGAGCGGTTTCAG           |
| chr19 | 2206679   | 2206717   | DOT1L_1775  | - | GTGACCTATGCACCAGACGTGACACTGCTTACTGCCACAGAGGAGGAAACAGAAAGATCGGAAGAGCGGTTTCAG          |
| chr19 | 2207523   | 2207562   | DOT1L_1776  | - | GTGACCTATGCACCAGACGTACAGGTTGAGGCCGGGCCCTGCGCCTGCCACAGCCCTCAGATCGGAAGAGCGGTTTCAG      |
| chr19 | 2208884   | 2208923   | DOT1L_1777  | - | GTGACCTATGCACCAGACGTGAAAGAGAACCCTGATTAGAAGGGAGTCCCAATCTCTGTTAGATCGGAAGAGCGGTTTCAG    |
| chr19 | 2210349   | 2210388   | DOT1L_1778  | - | GTGACCTATGCACCAGACGTAGCAGGTTGAGCCACAGGAAGCCACGCGCTGCCACCGGAGATCGGAAGAGCGGTTTCAG      |
| chr19 | 2210570   | 2210609   | DOT1L_1779  | - | GTGACCTATGCACCAGACGTCAAGGGAAGAACAGGGATGGGCACAGAGCCTCCACCCATAGATCGGAAGAGCGGTTTCAG     |
| chr19 | 2211048   | 2211087   | DOT1L_1780  | - | GTGACCTATGCACCAGACGTGGAGGGCAGGCTCAGCACAGGGCGGTCGGGAGAGCGGTAGATCGGAAGAGCGGTTTCAG      |
| chr19 | 2211700   | 2211739   | DOT1L_1781  | - | GTGACCTATGCACCAGACGTGAGCCGAACACAGGTGAGAAGAGAGCAGCTGAGACTGAGAAGATCGGAAGAGCGGTTTCAG    |
| chr19 | 2213488   | 2213527   | DOT1L_1782  | - | GTGACCTATGCACCAGACGTAAACAGGTCAGTACTAAGGGCCAGGGCAGGTGACTGAGGAGATCGGAAGAGCGGTTTCAG     |
| chr19 | 2213798   | 2213837   | DOT1L_1783  | - | GTGACCTATGCACCAGACGTGGGGCGGGGAGAGGTCATGCTGGTGGCCCTCAAGGTGAAAGATCGGAAGAGCGGTTTCAG     |
| chr19 | 2214420   | 2214459   | DOT1L_1784  | - | GTGACCTATGCACCAGACGTAGGGATGGGACAGTTGCGACTGGCTGGCTGCCCTGCCACAGCAGATCGGAAGAGCGGTTTCAG  |
| chr19 | 2216230   | 2216269   | DOT1L_1785  | - | GTGACCTATGCACCAGACGTAGAGATGGTGTGTCAGGCCCGCCACCGGGGACCACTCAAGATCGGAAGAGCGGTTTCAG      |
| chr19 | 2216904   | 2216943   | DOT1L_1786  | - | GTGACCTATGCACCAGACGTAAAGCTGACGTCACTCTCGAGGCGGTGGCTGGCACTGAGATCGGAAGAGCGGTTTCAG       |
| chr19 | 2217721   | 2217760   | DOT1L_1787  | - | GTGACCTATGCACCAGACGTAGGCCCGACCCCACTGCTGGGTCAACAAACCCCTCCAGGAGATCGGAAGAGCGGTTTCAG     |
| chr19 | 2220057   | 2220096   | DOT1L_1788  | - | GTGACCTATGCACCAGACGTAAAACCTGTGTGTGTCAGGGGCAGCAGGTGCCACAGGAGACAGATCGGAAGAGCGGTTTCAG   |
| chr19 | 2221925   | 2221964   | DOT1L_1789  | - | GTGACCTATGCACCAGACGTGGACATGGGGTCTCAGGGGACACAGGATGGCCAAAGAGAAAGATCGGAAGAGCGGTTTCAG    |
| chr19 | 2223230   | 2223269   | DOT1L_1790  | - | GTGACCTATGCACCAGACGTACAGACACAATGGATGCACATACCACAGACCCGGGACCCAGATCGGAAGAGCGGTTTCAG     |
| chr19 | 2225337   | 2225376   | DOT1L_1791  | - | GTGACCTATGCACCAGACGTAAAAGGTCATTAATGCTTGAACCCAGCTGCATACTAAGAGATCGGAAGAGCGGTTTCAG      |
| chr19 | 2226132   | 2226171   | DOT1L_1792  | - | GTGACCTATGCACCAGACGTGAAAGGCAGGACCGTGAAGCCGAGGCCACAGCAGCTGCCCGGAGATCGGAAGAGCGGTTTCAG  |
| chr19 | 2229734   | 2229773   | DOT1L_1793  | - | GTGACCTATGCACCAGACGTGCACAGCGGGAAGAGCGGCTGAGGTTACCATCGCGCCTGAGATCGGAAGAGCGGTTTCAG     |
| chr19 | 2222217   | 2222256   | DOT1L_1794  | - | GTGACCTATGCACCAGACGTAGGGCAGGTTCTCCCTTGTGGCTCGGGCAACGGGCCCTGAGATCGGAAGAGCGGTTTCAG     |
| chr19 | 2226604   | 2226643   | DOT1L_1795  | - | GTGACCTATGCACCAGACGTGTCAGGCTGCTCTTGTCTCAGGAAAGGTTGGCGTCCGAAGATCGGAAGAGCGGTTTCAG      |
| chr3  | 134514424 | 134514463 | EPHB1_1796  | - | GTGACCTATGCACCAGACGTGCGCCCGCAGCCGAGCAAGCCGAGGCAGCAGCGCCGAGATCGGAAGAGCGGTTTCAG        |
| chr3  | 134644608 | 134644647 | EPHB1_1797  | - | GTGACCTATGCACCAGACGTAAAAGAAAAACGAATAAACAAAAACAAATGAGTCAGAAGGAGATCGGAAGAGCGGTTTCAG    |
| chr3  | 134670163 | 134670202 | EPHB1_1798  | - | GTGACCTATGCACCAGACGTGAGGCCACAGGCACACACATGCAAAAACACAAAATAGAGAAGATCGGAAGAGCGGTTTCAG    |

|       |           |           |            |   |                                                                                     |
|-------|-----------|-----------|------------|---|-------------------------------------------------------------------------------------|
| chr3  | 134825240 | 134825279 | EPHB1_1799 | - | GTGACCTATGCACCAGACGTAAGAGACCATGTGATAATTAATGGAAGTGTGGCAGCCAGAAGATCGGAAGAGCGGTTTCAG   |
| chr3  | 134851506 | 134851545 | EPHB1_1800 | - | GTGACCTATGCACCAGACGTACAAGAAGGTCAGTGTAGGCTAGACATAAGCTTCCCTTTAGATCGGAAGAGCGGTTTCAG    |
| chr3  | 134872944 | 134872983 | EPHB1_1801 | - | GTGACCTATGCACCAGACGTAGAAAGAAACAGGGTAGCTGAACAGACACTCAATTATAGGAGATCGGAAGAGCGGTTTCAG   |
| chr3  | 134880810 | 134880849 | EPHB1_1802 | - | GTGACCTATGCACCAGACGTGCAAGGGAAGGGTCACTATCCCATTCTGAAGGCTACACAGATCGGAAGAGCGGTTTCAG     |
| chr3  | 134884760 | 134884799 | EPHB1_1803 | - | GTGACCTATGCACCAGACGTAAAGAGGCATTAGAAATCCTCCCATGTGCCCTTTGCATACAAGATCGGAAGAGCGGTTTCAG  |
| chr3  | 134885734 | 134885773 | EPHB1_1804 | - | GTGACCTATGCACCAGACGTAAAGAGGGGCTCTCTCAGCCACAGGGCACCCACCCAGTTCAGATCGGAAGAGCGGTTTCAG   |
| chr3  | 134898652 | 134898691 | EPHB1_1805 | - | GTGACCTATGCACCAGACGTGAGATAAGCAGGGTTAACAATCCCAAGAGGACATGTTGTAGATCGGAAGAGCGGTTTCAG    |
| chr3  | 134911368 | 134911407 | EPHB1_1806 | - | GTGACCTATGCACCAGACGTAAAAATGCCATTAATATCCTCTTCTCTCAGTCTGTGGAAGATCGGAAGAGCGGTTTCAG     |
| chr3  | 134920266 | 134920305 | EPHB1_1807 | - | GTGACCTATGCACCAGACGTACATAGAGGGCATTGGGATCAAGACGGGCTTCAATGGTTAAGATCGGAAGAGCGGTTTCAG   |
| chr3  | 134959940 | 134959979 | EPHB1_1808 | - | GTGACCTATGCACCAGACGTGAGAACCCTGGTCAGCCCAACAATCAGGTTTCTGATTGAAGATCGGAAGAGCGGTTTCAG    |
| chr3  | 134967108 | 134967147 | EPHB1_1809 | - | GTGACCTATGCACCAGACGTATACAGGGAAACAGGTGTGATTGAGTGACTGCCACCAGCCAAGATCGGAAGAGCGGTTTCAG  |
| chr3  | 134968128 | 134968167 | EPHB1_1810 | - | GTGACCTATGCACCAGACGTAGAGATGGGCAGGTGACCACACTGCAGAGATGCATGGAAGATCGGAAGAGCGGTTTCAG     |
| chr3  | 134977804 | 134977843 | EPHB1_1811 | - | GTGACCTATGCACCAGACGTAGAGGCCAGAAAAGAGTCACTTTAGTGTAGGTTAGCTTTAGATCGGAAGAGCGGTTTCAG    |
| chr3  | 134670504 | 134670543 | EPHB1_1812 | - | GTGACCTATGCACCAGACGTCAAAGTCCACCTGGGAGAAGCTCTCATCTGCAGCAATGGTAGATCGGAAGAGCGGTTTCAG   |
| chr7  | 142560936 | 142560975 | EPHB6_1813 | - | GTGACCTATGCACCAGACGTGAGGGGCTCCACCATCGCCCCAGCCACCACCTGCTCCTGAGATCGGAAGAGCGGTTTCAG    |
| chr7  | 142561339 | 142561378 | EPHB6_1814 | - | GTGACCTATGCACCAGACGTATAAGAGGGGCACACAGTGGCCAAGCCTCCAGCCAGACTAGATCGGAAGAGCGGTTTCAG    |
| chr7  | 142561674 | 142561713 | EPHB6_1815 | - | GTGACCTATGCACCAGACGTGGCCAGGAGAAGCTTTAGGGGCTCCGGGCTTAAGCAAGGCAGATCGGAAGAGCGGTTTCAG   |
| chr7  | 142563180 | 142563219 | EPHB6_1816 | - | GTGACCTATGCACCAGACGTGAGAGAGTGGGGGCTGCACCTCGCTGTCCACCCACAGATCGGAAGAGCGGTTTCAG        |
| chr7  | 142563665 | 142563704 | EPHB6_1817 | - | GTGACCTATGCACCAGACGTGAGGATATGGCAGTCCAAGGGCCAAGAGGGCAGTGGAGATCGGAAGAGCGGTTTCAG       |
| chr7  | 142564186 | 142564225 | EPHB6_1818 | - | GTGACCTATGCACCAGACGTAAAGGAAAATTATTATGGGGATAGGAGTCCCTGGGAGCAGAGATCGGAAGAGCGGTTTCAG   |
| chr7  | 142564611 | 142564650 | EPHB6_1819 | - | GTGACCTATGCACCAGACGTGAGCCACTCACTCCCTGCCTGGCCCCCTCTTGCCCCCTGCTAGATCGGAAGAGCGGTTTCAG  |
| chr7  | 142565313 | 142565352 | EPHB6_1820 | - | GTGACCTATGCACCAGACGTAGCCGACAGGGTCCACAGTGGGGCAGGCTCTCTCACAGGTGAGATCGGAAGAGCGGTTTCAG  |
| chr7  | 142565702 | 142565741 | EPHB6_1821 | - | GTGACCTATGCACCAGACGTAAACGGTACTGGGGATGACGCTCCCATTTCCACCCCTTAGATCGGAAGAGCGGTTTCAG     |
| chr7  | 142565946 | 142565985 | EPHB6_1822 | - | GTGACCTATGCACCAGACGTGGAGGATGTTGATGAGCGTGTGTGAAGGCAGGGCTGCAGATCGGAAGAGCGGTTTCAG      |
| chr7  | 142566197 | 142566236 | EPHB6_1823 | - | GTGACCTATGCACCAGACGTAGGTGTAGGTTGGGGTGGGGATCAAGGCTCACAGCGTCTAGATCGGAAGAGCGGTTTCAG    |
| chr7  | 142566677 | 142566716 | EPHB6_1824 | - | GTGACCTATGCACCAGACGTGGGGCAGGGGCAGAGTCACTGATCGGAGACGGGGAGACAGATCGGAAGAGCGGTTTCAG     |
| chr7  | 142567917 | 142567956 | EPHB6_1825 | - | GTGACCTATGCACCAGACGTGAGGAAGACTATGATGATGGGAAGTTTTGTTAGTAGAGGGAGATCGGAAGAGCGGTTTCAG   |
| chr7  | 142568233 | 142568272 | EPHB6_1826 | - | GTGACCTATGCACCAGACGTAGGGGCAAGCAGGGTCAAGGCTCCTCTTCTTACCTTAGCCAGATCGGAAGAGCGGTTTCAG   |
| chr7  | 142568499 | 142568538 | EPHB6_1827 | - | GTGACCTATGCACCAGACGTGGGAAGGACTCAAATCGGGCCAGCTTCTCCGAGATCCCAGATCGGAAGAGCGGTTTCAG     |
| chr20 | 57415112  | 57415151  | GNAS_1828  | - | GTGACCTATGCACCAGACGTACACCCAGAGAAGCCGGCCCTCGCTTGTGCTGCAGAGAAGATCGGAAGAGCGGTTTCAG     |
| chr20 | 57428271  | 57428310  | GNAS_1829  | - | GTGACCTATGCACCAGACGTGGCCCTCTCAAATAAGTTTGGGGCTCCGTAAGATGGAGCAGATCGGAAGAGCGGTTTCAG    |
| chr20 | 57470617  | 57470656  | GNAS_1830  | - | GTGACCTATGCACCAGACGTAAAGTAAGTCTCAGGTTATGAAGGAGGCATTTAACACTTAGATCGGAAGAGCGGTTTCAG    |
| chr20 | 57473946  | 57473985  | GNAS_1831  | - | GTGACCTATGCACCAGACGTGAGATTGAAAGCTCACCTAATCTGCAAGGCACCCGAGTGTAGATCGGAAGAGCGGTTTCAG   |
| chr20 | 57478533  | 57478572  | GNAS_1832  | - | GTGACCTATGCACCAGACGTGAAAAGAAAAGAAATCATATTGCACCATGCAGTTAGGAAGATCGGAAGAGCGGTTTCAG     |
| chr20 | 57478536  | 57478575  | GNAS_1833  | - | GTGACCTATGCACCAGACGTATTGAAAAGAAAAGAAAATCATATTGCACCATGTCAGTTAAGATCGGAAGAGCGGTTTCAG   |
| chr20 | 57478677  | 57478716  | GNAS_1834  | - | GTGACCTATGCACCAGACGTTTTAGCAAAGCGGTGAGGGAAACGACTGGCTGGGAGGGCAGATCGGAAGAGCGGTTTCAG    |
| chr20 | 57480388  | 57480427  | GNAS_1835  | - | GTGACCTATGCACCAGACGTACACAAGAAAGTTTAGAGAAAAGCAAGAGCTTGAACATAATAGATCGGAAGAGCGGTTTCAG  |
| chr20 | 57484167  | 57484206  | GNAS_1836  | - | GTGACCTATGCACCAGACGTAAAGAAAGACACGTGGGGTGTTCACAGCGCTCACATCAATTAGATCGGAAGAGCGGTTTCAG  |
| chr20 | 57484355  | 57484394  | GNAS_1837  | - | GTGACCTATGCACCAGACGTATTGAGGTCAATGGATCTCACCAAAGCCAACCGAAACAGTAGATCGGAAGAGCGGTTTCAG   |
| chr20 | 57484526  | 57484565  | GNAS_1838  | - | GTGACCTATGCACCAGACGTGGAGGACGCTGGTTATTCAGAGGGACTGGGGTGAATGTAGATCGGAAGAGCGGTTTCAG     |
| chr20 | 57484689  | 57484728  | GNAS_1839  | - | GTGACCTATGCACCAGACGTGAGAGCAAAGGCCAAGAGCGTGAGCAGCCACTGATCCCTAGATCGGAAGAGCGGTTTCAG    |
| chr20 | 57484956  | 57484995  | GNAS_1840  | - | GTGACCTATGCACCAGACGTGGAGGCCGTGTGAATGCTTGGGAGAAGCGCGCTTTCCGCCAGATCGGAAGAGCGGTTTCAG   |
| chr20 | 57485339  | 57485378  | GNAS_1841  | - | GTGACCTATGCACCAGACGTAGGGAAATACATATTAAATGTAATTTAAATTAAGCAGAGCAGATCGGAAGAGCGGTTTCAG   |
| chr20 | 57485688  | 57485727  | GNAS_1842  | - | GTGACCTATGCACCAGACGTAAACAAGGGGACTTGTCACTGACACCCCTGCCAGGAACCAAGATCGGAAGAGCGGTTTCAG   |
| chr20 | 57415481  | 57415520  | GNAS_1843  | - | GTGACCTATGCACCAGACGTTCGATTTCCGGACTCGGCTCGCTCTCGGCTCGTGTAGTGAAGATCGGAAGAGCGGTTTCAG   |
| chr20 | 57428684  | 57428723  | GNAS_1844  | - | GTGACCTATGCACCAGACGTGCAAGGCCTCAAGGCCTGCACTGGCCCACTGGGGAATCCAGATCGGAAGAGCGGTTTCAG    |
| chr20 | 57429097  | 57429136  | GNAS_1845  | - | GTGACCTATGCACCAGACGTGCGGTTGCGCGCGGGAGTGAGGGCGGACCGCACTCGAGGCCAGATCGGAAGAGCGGTTTCAG  |
| chr20 | 57429510  | 57429549  | GNAS_1846  | - | GTGACCTATGCACCAGACGTTCTTCTGGGGTTGCCCCGGAGTCAGGATCGGCTGGGGCTGAGATCGGAAGAGCGGTTTCAG   |
| chr20 | 57429923  | 57429962  | GNAS_1847  | - | GTGACCTATGCACCAGACGTGCGAGTAGGCCGCGGAGTAGGCCGATCGGCAGCCTGGATAGATCGGAAGAGCGGTTTCAG    |
| chr14 | 62162473  | 62162512  | HIF1A_1848 | - | GTGACCTATGCACCAGACGTTCCCCCGATGTCTTACGGCGGGCGGCCCCAGGCTCGCAGATCGGAAGAGCGGTTTCAG      |
| chr14 | 62187050  | 62187089  | HIF1A_1849 | - | GTGACCTATGCACCAGACGTACAACAAGAAAACAGAGATGGAAGTGTATACAAGTTAAGATCGGAAGAGCGGTTTCAG      |
| chr14 | 62188177  | 62188216  | HIF1A_1850 | - | GTGACCTATGCACCAGACGTACAAGAAAGGAAAATAATAGTTAAAAAGTTGACTTAAGATCGGAAGAGCGGTTTCAG       |
| chr14 | 62188407  | 62188446  | HIF1A_1851 | - | GTGACCTATGCACCAGACGTATTTTTAAAAAATTAGGGCTAGATCATAAAATCATAAAAAACAGATCGGAAGAGCGGTTTCAG |
| chr14 | 62193374  | 62193413  | HIF1A_1852 | - | GTGACCTATGCACCAGACGTCATGAAATAAAGTTTAAAGCAACTAAATATACAAATTTGAGATCGGAAGAGCGGTTTCAG    |
| chr14 | 62194121  | 62194160  | HIF1A_1853 | - | GTGACCTATGCACCAGACGTAGAACAAAGCAGTTAAAAAAAATATTTACAATGCTAGGGAAGATCGGAAGAGCGGTTTCAG   |
| chr14 | 62199086  | 62199125  | HIF1A_1854 | - | GTGACCTATGCACCAGACGTAAATAACAAGATTTAAGAAAAAAAAGGGAGACACTGATAAAGATCGGAAGAGCGGTTTCAG   |
| chr14 | 62200806  | 62200845  | HIF1A_1855 | - | GTGACCTATGCACCAGACGTAAAGAAAATAATCATGACAGAAAATAATTTAACTTTGAGATCGGAAGAGCGGTTTCAG      |
| chr14 | 62203557  | 62203596  | HIF1A_1856 | - | GTGACCTATGCACCAGACGTAAAGAAAATTGTAATTCACAATAATGACACTTGATACAGTAGATCGGAAGAGCGGTTTCAG   |



|       |           |           |             |   |                                                                                     |
|-------|-----------|-----------|-------------|---|-------------------------------------------------------------------------------------|
| chr14 | 62207173  | 62207212  | HIF1A_1857  | - | GTGACCTATGCACCAGACGTAAATATGTTTACTATTTCTGAAGAAGCTTCCATATACTTAGATCGGAAGAGCGGTTTCAG    |
| chr14 | 62207423  | 62207462  | HIF1A_1858  | - | GTGACCTATGCACCAGACGTGCAAATACATGAGTTTTTACAATGCCACACCTTATAAATAGATCGGAAGAGCGGTTTCAG    |
| chr14 | 62211373  | 62211412  | HIF1A_1859  | - | GTGACCTATGCACCAGACGTAAAAATCTAAATGAAAATATAGCGTTTTTAAAAAAAATAAGATCGGAAGAGCGGTTTCAG    |
| chr14 | 62212359  | 62212398  | HIF1A_1860  | - | GTGACCTATGCACCAGACGTAAAGTTATTTCAAGTTTAGTTTGTGAATTTTTTTTTAAGATCGGAAGAGCGGTTTCAG      |
| chr11 | 94153241  | 94153280  | MRE11A_1861 | - | GTGACCTATGCACCAGACGTGGCATTGAGAAACATGCAAGATACAGGAAAAATGAAAATGAGATCGGAAGAGCGGTTTCAG   |
| chr11 | 94168948  | 94168987  | MRE11A_1862 | - | GTGACCTATGCACCAGACGTGATTTCTGCAAAAAGAACATCTGAAAAAAATAAAAATAGATCGGAAGAGCGGTTTCAG      |
| chr11 | 94170293  | 94170332  | MRE11A_1863 | - | GTGACCTATGCACCAGACGTAAAGTTTTTCTGAGTTGTGATTAATAATTTATGTTTTCTGCAAGATCGGAAGAGCGGTTTCAG |
| chr11 | 94178926  | 94178965  | MRE11A_1864 | - | GTGACCTATGCACCAGACGTACTGCAAGTGATTATTTATAAATTTCCAACTTAGAAAGACAGATCGGAAGAGCGGTTTCAG   |
| chr11 | 94180335  | 94180374  | MRE11A_1865 | - | GTGACCTATGCACCAGACGTAGTTCAGTCTGTGCACATTCACACTTGGCAGTTGAGTGAGATCGGAAGAGCGGTTTCAG     |
| chr11 | 94189392  | 94189431  | MRE11A_1866 | - | GTGACCTATGCACCAGACGTGCTGCAAAATCTGTGTTTATATATCACTTTCTTAAACTAGATCGGAAGAGCGGTTTCAG     |
| chr11 | 94192524  | 94192563  | MRE11A_1867 | - | GTGACCTATGCACCAGACGTAAATTTGAGTGTCTAGGTCTATTTAAATAGCTGTCTTTAAAGATCGGAAGAGCGGTTTCAG   |
| chr11 | 94194052  | 94194091  | MRE11A_1868 | - | GTGACCTATGCACCAGACGTACAGTTACATTTGAAATAAGTCTTATAGTAAACAGATCGGAAGAGCGGTTTCAG          |
| chr11 | 94197229  | 94197268  | MRE11A_1869 | - | GTGACCTATGCACCAGACGTATTTTTATGAGGTAATAAAAAATGTTCTTATAGGATTTGTGAGATCGGAAGAGCGGTTTCAG  |
| chr11 | 94200929  | 94200968  | MRE11A_1870 | - | GTGACCTATGCACCAGACGTTTTATATAGATTGAATATTATAATTTTCAAAGCATAGTAAGATCGGAAGAGCGGTTTCAG    |
| chr11 | 94203587  | 94203626  | MRE11A_1871 | - | GTGACCTATGCACCAGACGTGATAAAGTCAATGAGATCTACTTTAGTTGAAGAATTATAGATCGGAAGAGCGGTTTCAG     |
| chr11 | 94204690  | 94204729  | MRE11A_1872 | - | GTGACCTATGCACCAGACGTATATTTTTGAGCCAAATTTTAAAGAAATCTTTGCTATAATAAGATCGGAAGAGCGGTTTCAG  |
| chr11 | 94209405  | 94209444  | MRE11A_1873 | - | GTGACCTATGCACCAGACGTCTCTGAAAAAGTTTGACCAAGTGTGAGGCTTCCCAAAAGATCGGAAGAGCGGTTTCAG      |
| chr11 | 94211851  | 94211890  | MRE11A_1874 | - | GTGACCTATGCACCAGACGTTTTTTACTGTTTATGACCATGTGTGATTTTAAACAAGATCGGAAGAGCGGTTTCAG        |
| chr11 | 94212790  | 94212829  | MRE11A_1875 | - | GTGACCTATGCACCAGACGTTTTTCTTAGAGTTTGTGGAATTTTGGAAATGATCAGTTTATAGATCGGAAGAGCGGTTTCAG  |
| chr11 | 94219040  | 94219079  | MRE11A_1876 | - | GTGACCTATGCACCAGACGTATTACTTGTAGTGAGTGATTACTTTGTGTATGGTATTTGAGATCGGAAGAGCGGTTTCAG    |
| chr11 | 94223949  | 94223988  | MRE11A_1877 | - | GTGACCTATGCACCAGACGTTTGTATTTGTGCATATCTACCATATTCCTTGGTTAACAGATCGGAAGAGCGGTTTCAG      |
| chr11 | 94225898  | 94225937  | MRE11A_1878 | - | GTGACCTATGCACCAGACGTGACTTCTGGAATCCCTTGTATTTGGGGTTTCTAAAGCTCAGATCGGAAGAGCGGTTTCAG    |
| chr16 | 81819545  | 81819584  | PLCG2_1879  | - | GTGACCTATGCACCAGACGTCCAGGGGAAAGGAAGAAATCGGGAGAATCAGGAAGCTGAGATCGGAAGAGCGGTTTCAG     |
| chr16 | 81887999  | 81888038  | PLCG2_1880  | - | GTGACCTATGCACCAGACGTATTAACATGAGCCAATTAGAAGCTGGATGCTCCCTCCACCTAGATCGGAAGAGCGGTTTCAG  |
| chr16 | 81891818  | 81891857  | PLCG2_1881  | - | GTGACCTATGCACCAGACGTGAAAGGGAACAGAAATGCTGTGTTAATCTCTGGGAAGACGAGATCGGAAGAGCGGTTTCAG   |
| chr16 | 81892671  | 81892710  | PLCG2_1882  | - | GTGACCTATGCACCAGACGTATATGAGACAAAAGAAAGAGAGAAAGAGAAAATTAGAAAAAGATCGGAAGAGCGGTTTCAG   |
| chr16 | 81902769  | 81902808  | PLCG2_1883  | - | GTGACCTATGCACCAGACGTGGGAGACCCAGTTCTGTCACTTGAGGGTTTTCAACAGCAAGATCGGAAGAGCGGTTTCAG    |
| chr16 | 81904407  | 81904446  | PLCG2_1884  | - | GTGACCTATGCACCAGACGTGAAAAAAGTGACCACATGATTTTTGATGTCCACCCTAAGAAGATCGGAAGAGCGGTTTCAG   |
| chr16 | 81914465  | 81914504  | PLCG2_1885  | - | GTGACCTATGCACCAGACGTGAGCACACAAAAAAGAACCTTAGACAAGTCACTTAAAGATCGGAAGAGCGGTTTCAG       |
| chr16 | 81916824  | 81916863  | PLCG2_1886  | - | GTGACCTATGCACCAGACGTGAAAGGGGTCAGTTAGACACAGACACATTCAACAGAGAGATCGGAAGAGCGGTTTCAG      |
| chr16 | 81922727  | 81922766  | PLCG2_1887  | - | GTGACCTATGCACCAGACGTCAAAGAGAACGAGAGATCAGCAAAGTGAGAACTGATAAAAAGATCGGAAGAGCGGTTTCAG   |
| chr16 | 81925027  | 81925066  | PLCG2_1888  | - | GTGACCTATGCACCAGACGTCAAACACGAAGACCGAATCATCAGTTGACGGGCAGGATGAGATCGGAAGAGCGGTTTCAG    |
| chr16 | 81927264  | 81927303  | PLCG2_1889  | - | GTGACCTATGCACCAGACGTGAAGGCAGGTGGCCGTGTGAGAGTGGCAGCCACAGGGTTAGATCGGAAGAGCGGTTTCAG    |
| chr16 | 81929362  | 81929401  | PLCG2_1890  | - | GTGACCTATGCACCAGACGTAAACGGGCGCCTCAATACCAGTGTGTTCACTGACAGCAGATCGGAAGAGCGGTTTCAG      |
| chr16 | 81934167  | 81934206  | PLCG2_1891  | - | GTGACCTATGCACCAGACGTAAAGAGGCTAGAGGCTCGGCAGGAGGACACACACTCTGAGATCGGAAGAGCGGTTTCAG     |
| chr16 | 81938958  | 81938997  | PLCG2_1892  | - | GTGACCTATGCACCAGACGTAAACATATACATAGGCTGTCTCCATGGAGACCCAAGTTTAGAGATCGGAAGAGCGGTTTCAG  |
| chr16 | 81941240  | 81941279  | PLCG2_1893  | - | GTGACCTATGCACCAGACGTAAACTGGTATTAGTGCCCCCAAGTCTCTACCTCATCAAAGATCGGAAGAGCGGTTTCAG     |
| chr16 | 81941971  | 81942010  | PLCG2_1894  | - | GTGACCTATGCACCAGACGTAAAGAGAGGAGGGTTTTCTGAAAGCCTTGGACCAAACCCCAAGATCGGAAGAGCGGTTTCAG  |
| chr16 | 81944075  | 81944114  | PLCG2_1895  | - | GTGACCTATGCACCAGACGTAGGACGCCATCAGTGTGGGAGAACGCAGGCCAGGCCATTAGATCGGAAGAGCGGTTTCAG    |
| chr16 | 81946152  | 81946191  | PLCG2_1896  | - | GTGACCTATGCACCAGACGTGGGCCAGGGAAAAACAGCCAGGTGAGCCGTCTCCAGGCTGATAGATCGGAAGAGCGGTTTCAG |
| chr16 | 81953039  | 81953078  | PLCG2_1897  | - | GTGACCTATGCACCAGACGTAAAGAACACAGGGTTGACATGCAAGATCCTGGTGGCCAAAAGATCGGAAGAGCGGTTTCAG   |
| chr16 | 81954753  | 81954792  | PLCG2_1898  | - | GTGACCTATGCACCAGACGTAAAGAAAAGAAAGAAATGGAATAATCCATGCTCCTGGAATAAGATCGGAAGAGCGGTTTCAG  |
| chr16 | 81957040  | 81957079  | PLCG2_1899  | - | GTGACCTATGCACCAGACGTAAACAAGAAAGAAAAGGTGAGCCAGGGACAGGAGGGGAGAGATCGGAAGAGCGGTTTCAG    |
| chr16 | 81960637  | 81960676  | PLCG2_1900  | - | GTGACCTATGCACCAGACGTAGAGAGGACATGGGGGCGCTGTCAACAGGTGGCATGAATTAGATCGGAAGAGCGGTTTCAG   |
| chr16 | 81962113  | 81962152  | PLCG2_1901  | - | GTGACCTATGCACCAGACGTACAAGACATAACTCACGTTAGTTGTAACGGGAATAATAAAAAGATCGGAAGAGCGGTTTCAG  |
| chr16 | 81965052  | 81965091  | PLCG2_1902  | - | GTGACCTATGCACCAGACGTGAGAATGAGAAATGCTCCAATCAGCAATCAGATCGGAAGAGCGGTTTCAG              |
| chr16 | 81967984  | 81968023  | PLCG2_1903  | - | GTGACCTATGCACCAGACGTCTTACTGTCTTTAGTGCCCGCCCCGAGAAATCCCATCTTAGATCGGAAGAGCGGTTTCAG    |
| chr16 | 81969724  | 81969763  | PLCG2_1904  | - | GTGACCTATGCACCAGACGTAGAAAAAGTTCATCAGTACTTCTGTGCTCATCTGTGCATAGATCGGAAGAGCGGTTTCAG    |
| chr16 | 81971313  | 81971352  | PLCG2_1905  | - | GTGACCTATGCACCAGACGTAAAGTGAACGCCTGTGTAAGTCAAGCATGAGCACGCTGGCAGATCGGAAGAGCGGTTTCAG   |
| chr16 | 81972356  | 81972395  | PLCG2_1906  | - | GTGACCTATGCACCAGACGTAAAGGGAAGCATTGGAACCCCCCTGGGGTCTGAAACAGGCAGATCGGAAGAGCGGTTTCAG   |
| chr16 | 81979730  | 81979769  | PLCG2_1907  | - | GTGACCTATGCACCAGACGTACAAGGAGGAAAATGCAAAGGCAGGTAAATTAATGTCAGACAGATCGGAAGAGCGGTTTCAG  |
| chr16 | 81991511  | 81991550  | PLCG2_1908  | - | GTGACCTATGCACCAGACGTACAGATTTACCATCAGCAGTGGGCCATGAGAAATGGGCTAGATCGGAAGAGCGGTTTCAG    |
| chr12 | 112856866 | 112856905 | PTPN11_1909 | - | GTGACCTATGCACCAGACGTCCCTCCGGCTCCGCGACGGACCCGCTCCTTGTCTCAGGCTCAGATCGGAAGAGCGGTTTCAG  |
| chr12 | 112884030 | 112884069 | PTPN11_1910 | - | GTGACCTATGCACCAGACGTAAAGACAAAGTAAGTAATAAAAAAACAAGACACTGTGACGAAGATCGGAAGAGCGGTTTCAG  |
| chr12 | 112888072 | 112888111 | PTPN11_1911 | - | GTGACCTATGCACCAGACGTCCATTGGAAGGGAGCAAGGGGACAATAAAGAGTTACAGATCGGAAGAGCGGTTTCAG       |
| chr12 | 112890949 | 112890988 | PTPN11_1912 | - | GTGACCTATGCACCAGACGTAAAAATAAAAAAAGAAATTTAGCTCTACTATGGGTTTATGAGATCGGAAGAGCGGTTTCAG   |
| chr12 | 112892318 | 112892357 | PTPN11_1913 | - | GTGACCTATGCACCAGACGTAAACACATGACATTTATAATTTGTACTTTATGTTACATAGATCGGAAGAGCGGTTTCAG     |
| chr12 | 112893704 | 112893743 | PTPN11_1914 | - | GTGACCTATGCACCAGACGTACACAGTTGATGTGATAAAGAAAATATTACAGAAAACAGATCGGAAGAGCGGTTTCAG      |

|       |           |           |             |   |                                                                                      |
|-------|-----------|-----------|-------------|---|--------------------------------------------------------------------------------------|
| chr12 | 112910698 | 112910737 | PTPN11_1915 | - | GTGACCTATGCACCAGACGTAGAAAAAGTCAATATTATTACGTGTCAAAGAGTCACAGAAAAGATCGGAAGAGCGGTTTCAG   |
| chr12 | 112915405 | 112915444 | PTPN11_1916 | - | GTGACCTATGCACCAGACGTAAAGAGACCAGGTCACATAAGTCTCGACTGCTTCAGGAAAAGATCGGAAGAGCGGTTTCAG    |
| chr12 | 112915611 | 112915650 | PTPN11_1917 | - | GTGACCTATGCACCAGACGTAGGAAGAAAATCCTTCAAACACCTTAAAGTTACTTTTCAGGAGATCGGAAGAGCGGTTTCAG   |
| chr12 | 112919828 | 112919867 | PTPN11_1918 | - | GTGACCTATGCACCAGACGTTCAGAAAAAAGAAAGTAAATCTGTGAACCTCTGAAATAAAGATCGGAAGAGCGGTTTCAG     |
| chr12 | 112924229 | 112924268 | PTPN11_1919 | - | GTGACCTATGCACCAGACGTGCCAAGAAAACCAGAAAAGAAATTAATAAATCAAGAGGTAGATCGGAAGAGCGGTTTCAG     |
| chr12 | 112926197 | 112926236 | PTPN11_1920 | - | GTGACCTATGCACCAGACGTAAAGGACAAAAGCAGGGACAACAGAATCATTTCATGGGGGTAGATCGGAAGAGCGGTTTCAG   |
| chr12 | 112926778 | 112926817 | PTPN11_1921 | - | GTGACCTATGCACCAGACGTAAACATCATGAAGATAAAGGAAAACCTGCAGAGCCAGGATGAGATCGGAAGAGCGGTTTCAG   |
| chr12 | 112939898 | 112939937 | PTPN11_1922 | - | GTGACCTATGCACCAGACGTGAAGAGTGCACATGTGAGGGACAATGGTTATTTTAAAGGGAGATCGGAAGAGCGGTTTCAG    |
| chr12 | 112942449 | 112942488 | PTPN11_1923 | - | GTGACCTATGCACCAGACGTAAAGAAAAAGAAAGACATTTACAAAATGTAGACCACGCTGAGATCGGAAGAGCGGTTTCAG    |
| chr5  | 131892967 | 131893006 | RAD50_1924  | - | GTGACCTATGCACCAGACGTGTTTCTAATCTCACCAGGGACCTGGAGCCCAAAAGGCTTAGATCGGAAGAGCGGTTTCAG     |
| chr5  | 131894926 | 131894965 | RAD50_1925  | - | GTGACCTATGCACCAGACGTAGAAAATTACATTATTTCTGTTATAAGAGAACCACAGAAAGTAGATCGGAAGAGCGGTTTCAG  |
| chr5  | 131911419 | 131911458 | RAD50_1926  | - | GTGACCTATGCACCAGACGTAAACACAGAAAAAATCTATGTTACTTTAATAAGCACCAAGTAGATCGGAAGAGCGGTTTCAG   |
| chr5  | 131914959 | 131914998 | RAD50_1927  | - | GTGACCTATGCACCAGACGTGAAAATCAAGAATATATGAAAATAACCTTCAGTGTATCAGATCGGAAGAGCGGTTTCAG      |
| chr5  | 131915011 | 131915050 | RAD50_1928  | - | GTGACCTATGCACCAGACGTATTTCTGCACACTTAGAGCTCAGACTGACCTTTTCACCATAGATCGGAAGAGCGGTTTCAG    |
| chr5  | 131923204 | 131923243 | RAD50_1929  | - | GTGACCTATGCACCAGACGTAGAAAACATTACATAAATAAACTCCTATAGCTTACATGGAGATCGGAAGAGCGGTTTCAG     |
| chr5  | 131923566 | 131923605 | RAD50_1930  | - | GTGACCTATGCACCAGACGTCCAAAATAAAAAGCTTTAATGTACAACATAAGAAAATATAGATCGGAAGAGCGGTTTCAG     |
| chr5  | 131924329 | 131924368 | RAD50_1931  | - | GTGACCTATGCACCAGACGTAAAAATCTCAATAATTTTTTTTCACTGGTGTCTAAAAAGAGATCGGAAGAGCGGTTTCAG     |
| chr5  | 131925273 | 131925312 | RAD50_1932  | - | GTGACCTATGCACCAGACGTGTAAGAATGAGCATTAATAAATTTACTAAACAATTTAAAGATCGGAAGAGCGGTTTCAG      |
| chr5  | 131926866 | 131926905 | RAD50_1933  | - | GTGACCTATGCACCAGACGTATTCATACAAATGCAAAAGGTGTTATATATTTTGTCAAGAAGATCGGAAGAGCGGTTTCAG    |
| chr5  | 131927519 | 131927558 | RAD50_1934  | - | GTGACCTATGCACCAGACGTAAAAAAAATCTTTAAAAATAAAGTCTATATCTCCACATTAGATCGGAAGAGCGGTTTCAG     |
| chr5  | 131930511 | 131930550 | RAD50_1935  | - | GTGACCTATGCACCAGACGTAGCAAAATGGATTTTCATTTTAAAAATAGGAGAAATAGTAGATCGGAAGAGCGGTTTCAG     |
| chr5  | 131931215 | 131931254 | RAD50_1936  | - | GTGACCTATGCACCAGACGTAAAAATAAATATATACCAATGAGAAAAAACATAAAAATAAGATCGGAAGAGCGGTTTCAG     |
| chr5  | 131939562 | 131939601 | RAD50_1937  | - | GTGACCTATGCACCAGACGTAAACAAAATGATTTCTTAAATAAATCTACTGCATTATTCAGATCGGAAGAGCGGTTTCAG     |
| chr5  | 131940448 | 131940487 | RAD50_1938  | - | GTGACCTATGCACCAGACGTACATAATTTACAGATAATTAAGTAAAGGCTATAGAAAATAAAGATCGGAAGAGCGGTTTCAG   |
| chr5  | 131944759 | 131944798 | RAD50_1939  | - | GTGACCTATGCACCAGACGTATATTCATTAATTTTACACTGGTGTACTTAAAGGGCACATAGATCGGAAGAGCGGTTTCAG    |
| chr5  | 131951645 | 131951684 | RAD50_1940  | - | GTGACCTATGCACCAGACGTACATTAATTAGTTAACAAAAATAACCAAGTTACTAACATAGATCGGAAGAGCGGTTTCAG     |
| chr5  | 131953712 | 131953751 | RAD50_1941  | - | GTGACCTATGCACCAGACGTGAAAAATGACAAATGAGGACCATTTTTTAGCTTTTAAACAAGATCGGAAGAGCGGTTTCAG    |
| chr5  | 131973723 | 131973762 | RAD50_1942  | - | GTGACCTATGCACCAGACGTAGAAAGAATATTTTAGAGGAACCTATGCTCTGTAGCCTTTAGATCGGAAGAGCGGTTTCAG    |
| chr5  | 131976314 | 131976353 | RAD50_1943  | - | GTGACCTATGCACCAGACGTGCCCTATGTGAGAAGCCAGCACAGACCTTCTCATCTCAAGATCGGAAGAGCGGTTTCAG      |
| chr5  | 131977820 | 131977859 | RAD50_1944  | - | GTGACCTATGCACCAGACGTATATTGAGCATATATTATGATAAAGAGCAACTAACCCCTTCAGATCGGAAGAGCGGTTTCAG   |
| chr15 | 40990907  | 40990946  | RAD51_1945  | - | GTGACCTATGCACCAGACGTACAAAATGCTTATCAGTATAAACACTAGAGAAATAAGGTGAGATCGGAAGAGCGGTTTCAG    |
| chr15 | 40998325  | 40998364  | RAD51_1946  | - | GTGACCTATGCACCAGACGTAAAGAAATATAAATCAACAAAATAATTTCTTACCACAAGATCGGAAGAGCGGTTTCAG       |
| chr15 | 41001173  | 41001212  | RAD51_1947  | - | GTGACCTATGCACCAGACGTGATAAGAAATAACTTTAGCATATAACAACATGTAGAAAAGATCGGAAGAGCGGTTTCAG      |
| chr15 | 41010953  | 41010992  | RAD51_1948  | - | GTGACCTATGCACCAGACGTCAAAAACAACAGTAAAGATGAACATTGTATTTCTGATACAAGATCGGAAGAGCGGTTTCAG    |
| chr15 | 41020859  | 41020898  | RAD51_1949  | - | GTGACCTATGCACCAGACGTGAAAGACACTTTTTAGGCTGCACAGAACTCAGGCAGAAAGATCGGAAGAGCGGTTTCAG      |
| chr15 | 41021653  | 41021692  | RAD51_1950  | - | GTGACCTATGCACCAGACGTCAAGGATTCTCTGAAGCCTATTTCTAGCCTGTGTAGATTAGATCGGAAGAGCGGTTTCAG     |
| chr15 | 41022001  | 41022040  | RAD51_1951  | - | GTGACCTATGCACCAGACGTAAAGATAAATGTCAATTTTGTGCCATAGACACTCCAAAAGATCGGAAGAGCGGTTTCAG      |
| chr15 | 41023203  | 41023242  | RAD51_1952  | - | GTGACCTATGCACCAGACGTGACACAGACCAAAGACCAATTTATATAATTAACAATAGATCGGAAGAGCGGTTTCAG        |
| chr13 | 80910843  | 80910882  | SPRY2_1953  | - | GTGACCTATGCACCAGACGTGAGGAAATTTACAGTAAATGAGGATTTTTTCTTTCTTTTATAGATCGGAAGAGCGGTTTCAG   |
| chr13 | 80911317  | 80911356  | SPRY2_1954  | - | GTGACCTATGCACCAGACGTAGCTTAAGCCACTGAGCAAGGAAGATTTGGGCCCTGCACGCAGATCGGAAGAGCGGTTTCAG   |
| chr16 | 89804959  | 89804998  | FANCA_1955  | - | GTGACCTATGCACCAGACGTCACTGCACACCAGCCAGCTCCCGTGTAAATAATTTATTAAGATCGGAAGAGCGGTTTCAG     |
| chr16 | 89805240  | 89805279  | FANCA_1956  | - | GTGACCTATGCACCAGACGTGATGCCACCTTGGGCCATGTGGGGGACATGAGAATTGACAGATCGGAAGAGCGGTTTCAG     |
| chr16 | 89805491  | 89805530  | FANCA_1957  | - | GTGACCTATGCACCAGACGTGGGCCAGTCCACCTCAGGGGAGCTCCCCAGCCGGAGAGATCGGAAGAGCGGTTTCAG        |
| chr16 | 89805836  | 89805875  | FANCA_1958  | - | GTGACCTATGCACCAGACGTCCACAGGGCTGGTCAGGGCTGGGAGTGTTCACAGACCAGATCGGAAGAGCGGTTTCAG       |
| chr16 | 89806352  | 89806391  | FANCA_1959  | - | GTGACCTATGCACCAGACGTGCTGCTGAGGCCAAATGCGGAGGGCCGCTCTTTTCAAGAAGATCGGAAGAGCGGTTTCAG     |
| chr16 | 89807162  | 89807201  | FANCA_1960  | - | GTGACCTATGCACCAGACGTCTTACCAGCCAGGTGCTCTCCACTGTGGGCCAGCAGATCGGAAGAGCGGTTTCAG          |
| chr16 | 89809158  | 89809197  | FANCA_1961  | - | GTGACCTATGCACCAGACGTAAATTTCTTTACTGATTTATTTTCTCGCAAGCTTGGTTTCAGATCGGAAGAGCGGTTTCAG    |
| chr16 | 89811317  | 89811356  | FANCA_1962  | - | GTGACCTATGCACCAGACGTGGTGAGATGGGGTGTGCCCGCCAGATGCACCTCGGAAGATCGGAAGAGCGGTTTCAG        |
| chr16 | 89812942  | 89812981  | FANCA_1963  | - | GTGACCTATGCACCAGACGTGTCTTGTGTTGGTGTGTTTGTGTTGGGGATGAGTGGGACACAGATCGGAAGAGCGGTTTCAG   |
| chr16 | 89813189  | 89813228  | FANCA_1964  | - | GTGACCTATGCACCAGACGTCCCTCAGCCCTCTCGTGGCCTTCTCAGAACGCCGTGGGTAGATCGGAAGAGCGGTTTCAG     |
| chr16 | 89815017  | 89815056  | FANCA_1965  | - | GTGACCTATGCACCAGACGTGCTGTGCACGTGCTCGTCCGATGCTGCATGCTGCTGCTGGCCGAGATCGGAAGAGCGGTTTCAG |
| chr16 | 89816088  | 89816127  | FANCA_1966  | - | GTGACCTATGCACCAGACGTCTACCACCTGGGCAGGCCAGCCAGCTGGGCAGGCAGATCGGAAGAGCGGTTTCAG          |
| chr16 | 89818496  | 89818535  | FANCA_1967  | - | GTGACCTATGCACCAGACGTGGGTGCCACAACCTCAGTGCATTCACTTCAATTTAAGCCGCGAGATCGGAAGAGCGGTTTCAG  |
| chr16 | 89831248  | 89831287  | FANCA_1968  | - | GTGACCTATGCACCAGACGTGTTCTTCTCTGCATCATGCCAGTCTGAGTCTAGGGTAGATCGGAAGAGCGGTTTCAG        |
| chr16 | 89833499  | 89833538  | FANCA_1969  | - | GTGACCTATGCACCAGACGTCTTTTCTATTTTCCATTCTGCCATACGTTTCAGGTTTAGATCGGAAGAGCGGTTTCAG       |
| chr16 | 89836524  | 89836563  | FANCA_1970  | - | GTGACCTATGCACCAGACGTCTTCATGGGGGCCACCTTGGGGGCCACTCTGAGGCCAGATCGGAAGAGCGGTTTCAG        |
| chr16 | 89836922  | 89836961  | FANCA_1971  | - | GTGACCTATGCACCAGACGTGGGCAGCTCCCTGAGTGGTGGGGCTCTGGGTGCCACCAGATCGGAAGAGCGGTTTCAG       |
| chr16 | 89838036  | 89838075  | FANCA_1972  | - | GTGACCTATGCACCAGACGTGGGCTCAGAACAAGCAGGGGGTCTTACCATTTCATTAGATCGGAAGAGCGGTTTCAG        |

|       |           |           |            |   |                                                                                    |
|-------|-----------|-----------|------------|---|------------------------------------------------------------------------------------|
| chr16 | 89839629  | 89839668  | FANCA_1973 | - | GTGACCTATGCACCAGACGTATGGGAGCTCATGCTGTGTCTCATGTGTGCAGCCTGTGGTAGATCGGAAGAGCGGTTTCAG  |
| chr16 | 89842100  | 89842139  | FANCA_1974 | - | GTGACCTATGCACCAGACGTGGGCCCTGTGCCACTCTGGGACTTGTGCTTTTCCATTTTAGATCGGAAGAGCGGTTTCAG   |
| chr16 | 89845159  | 89845198  | FANCA_1975 | - | GTGACCTATGCACCAGACGTACGGTTAGAAGGGGATGACTACTTCCAGGTTTCTTCTGACAGATCGGAAGAGCGGTTTCAG  |
| chr16 | 89845301  | 89845340  | FANCA_1976 | - | GTGACCTATGCACCAGACGTGTCTCCATGAGTTTGTGACCAGTTGTGTAGAAAAGCAAGGAAGATCGGAAGAGCGGTTTCAG |
| chr16 | 89846227  | 89846266  | FANCA_1977 | - | GTGACCTATGCACCAGACGTCTGCCGAAAAGGCCTCTAGCAGCTGCAGTGTGTGCAGACCAGATCGGAAGAGCGGTTTCAG  |
| chr16 | 89849217  | 89849256  | FANCA_1978 | - | GTGACCTATGCACCAGACGTTTGAGCCCTGCAGGGTCTCAGCCAGTCAAGCCACCATGCAGATCGGAAGAGCGGTTTCAG   |
| chr16 | 89849365  | 89849404  | FANCA_1979 | - | GTGACCTATGCACCAGACGTCTCCATGCCACTCTCACACCTGTCCACAGCAAACCTGAGATCGGAAGAGCGGTTTCAG     |
| chr16 | 89851212  | 89851251  | FANCA_1980 | - | GTGACCTATGCACCAGACGTGGCTGCCACATCCATGATTTCTGGTGCTTCGCTCACCTGCAGATCGGAAGAGCGGTTTCAG  |
| chr16 | 89857761  | 89857800  | FANCA_1981 | - | GTGACCTATGCACCAGACGTTGCCAATCGGCTACCTAATACCTGATCTTCCAGAAGGCCAGATCGGAAGAGCGGTTTCAG   |
| chr16 | 89858285  | 89858324  | FANCA_1982 | - | GTGACCTATGCACCAGACGTACGCGAGCCCGTGGTGTCTGGTCAAGAGTGTGTGTAGGGGAGATCGGAAGAGCGGTTTCAG  |
| chr16 | 89858829  | 89858868  | FANCA_1983 | - | GTGACCTATGCACCAGACGTGGTATTATACCTGCTTCTGAGCTCGTGGCGGGGGGATTAGATCGGAAGAGCGGTTTCAG    |
| chr16 | 89862264  | 89862303  | FANCA_1984 | - | GTGACCTATGCACCAGACGTTGTGGAGGCTGCTCAGTTCTACCTACCTTTTGGGATGCTAGATCGGAAGAGCGGTTTCAG   |
| chr16 | 89865437  | 89865476  | FANCA_1985 | - | GTGACCTATGCACCAGACGTCCCGCTCCTGAGCACACTTCTCTGCCAGTTACGATAACGAGATCGGAAGAGCGGTTTCAG   |
| chr16 | 89865524  | 89865563  | FANCA_1986 | - | GTGACCTATGCACCAGACGTGAGGGTGGCCTGCCTGAGTGTGCAGCAGGGAGGTGTCTGCAGATCGGAAGAGCGGTTTCAG  |
| chr16 | 89865963  | 89866002  | FANCA_1987 | - | GTGACCTATGCACCAGACGTTGCACTGCAGCCAGACTGTAATGACTTAGTTTGTCTATAGATCGGAAGAGCGGTTTCAG    |
| chr16 | 89869617  | 89869656  | FANCA_1988 | - | GTGACCTATGCACCAGACGTAAGTCAAGTGAAGAGTTTAGCGGAAGGAGCCGCTCTATTAGATCGGAAGAGCGGTTTCAG   |
| chr16 | 89871638  | 89871677  | FANCA_1989 | - | GTGACCTATGCACCAGACGTGCAAGATGCGGGTCTTGGGTAACACTATTGATCTGAGATCGGAAGAGCGGTTTCAG       |
| chr16 | 89874652  | 89874691  | FANCA_1990 | - | GTGACCTATGCACCAGACGTAATGATGATTGACTGTTACTGTCTTTCAGTCTAGTCTAGAGATCGGAAGAGCGGTTTCAG   |
| chr16 | 89877065  | 89877104  | FANCA_1991 | - | GTGACCTATGCACCAGACGTGATTGCAAACTGACTCTCCAGTGTCCAGGCAATGTTCTAGATCGGAAGAGCGGTTTCAG    |
| chr16 | 89877287  | 89877326  | FANCA_1992 | - | GTGACCTATGCACCAGACGTAGCAAAGATGAGGAAACCTGCCGTTGTTACTTTAAAGCTAGATCGGAAGAGCGGTTTCAG   |
| chr16 | 89880878  | 89880917  | FANCA_1993 | - | GTGACCTATGCACCAGACGTGCTTCATTTTCTCTATTTTGAATTGCAGAAGGGTTTTTATAGATCGGAAGAGCGGTTTCAG  |
| chr16 | 89882235  | 89882274  | FANCA_1994 | - | GTGACCTATGCACCAGACGTGCTGGTGTCCGCTGCGGGCAGATTTAGGTTTCGGGGTTTTAGATCGGAAGAGCGGTTTCAG  |
| chr16 | 89882895  | 89882934  | FANCA_1995 | - | GTGACCTATGCACCAGACGTGCGGAGCCCGGGAGTGGCGGCTCCGGCCCGGACGATCGGAAGAGCGGTTTCAG          |
| chr11 | 22646182  | 22646221  | FANCF_1996 | - | GTGACCTATGCACCAGACGTGTTATTACTTGAATATAGAATATAGTTTACAAAATGAAAGATCGGAAGAGCGGTTTCAG    |
| chr11 | 22646557  | 22646596  | FANCF_1997 | - | GTGACCTATGCACCAGACGTCCCTCCCAGCCGGCTTTTACTTTAGTACTAGCCGCAAGATCGGAAGAGCGGTTTCAG      |
| chr11 | 22646932  | 22646971  | FANCF_1998 | - | GTGACCTATGCACCAGACGTTCCAAGAGAGCCTGGCCCGCTTGGCCCGCGGCTGTCAGATCGGAAGAGCGGTTTCAG      |
| chr5  | 176516554 | 176516593 | FGFR4_1999 | - | GTGACCTATGCACCAGACGTCACTCTCAGGGACCCAAAGCTGGACTTCCCACCAACTGCCAGATCGGAAGAGCGGTTTCAG  |
| chr5  | 176517341 | 176517380 | FGFR4_2000 | - | GTGACCTATGCACCAGACGTAGGGCAGAGGTCAGCAGACCCCGCAGCCCATCTGAGGCAAGATCGGAAGAGCGGTTTCAG   |
| chr5  | 176517696 | 176517735 | FGFR4_2001 | - | GTGACCTATGCACCAGACGTGACAGAGGGAAGCATTAAGTCCAAGAGGGCAGGCTGAGATCGGAAGAGCGGTTTCAG      |
| chr5  | 176517889 | 176517928 | FGFR4_2002 | - | GTGACCTATGCACCAGACGTGGGGAAGGCCCTAGAAATGACCGTGTGTCCACACAGGCAGATCGGAAGAGCGGTTTCAG    |
| chr5  | 176518636 | 176518675 | FGFR4_2003 | - | GTGACCTATGCACCAGACGTAGAGAGTGTCCGGGACCACCGGACCATGTCCACCAAGGGGAGATCGGAAGAGCGGTTTCAG  |
| chr5  | 176519272 | 176519311 | FGFR4_2004 | - | GTGACCTATGCACCAGACGTGGCGAGACAGTCAACCCTGACCACCGGCACCCATAGAAAGCAGATCGGAAGAGCGGTTTCAG |
| chr5  | 176519597 | 176519636 | FGFR4_2005 | - | GTGACCTATGCACCAGACGTGGACATGCTCTGGGGTTCACAGCAGGGCCTGGGGCCACACTAGATCGGAAGAGCGGTTTCAG |
| chr5  | 176520089 | 176520128 | FGFR4_2006 | - | GTGACCTATGCACCAGACGTACATGGACACACAGACAGCAAACCTGGTCAAGTGGAGAGATCGGAAGAGCGGTTTCAG     |
| chr5  | 176520283 | 176520322 | FGFR4_2007 | - | GTGACCTATGCACCAGACGTAGAGGGAAGCGGAGAGCTTCTGCACAGTGGCGGGCGGACAGATCGGAAGAGCGGTTTCAG   |
| chr5  | 176520357 | 176520396 | FGFR4_2008 | - | GTGACCTATGCACCAGACGTGGAGACTTGGTCTGCCTGCTGGAGTCAAGGCTGTCACATGAGATCGGAAGAGCGGTTTCAG  |
| chr5  | 176520605 | 176520644 | FGFR4_2009 | - | GTGACCTATGCACCAGACGTAGAAAGTCCAGCCTCAGACCTCCGAGTCACTCTGCGGAGAGATCGGAAGAGCGGTTTCAG   |
| chr5  | 176522281 | 176522320 | FGFR4_2010 | - | GTGACCTATGCACCAGACGTAGCAGACGGGTTGAAGAGGCTGCCCTCAACTGCACGAGGAGATCGGAAGAGCGGTTTCAG   |
| chr5  | 176522484 | 176522523 | FGFR4_2011 | - | GTGACCTATGCACCAGACGTAGTGGAGGGAGCGTGGAGAGGCTGCCAAAGCTTTGGCTCTAGATCGGAAGAGCGGTTTCAG  |
| chr5  | 176523008 | 176523047 | FGFR4_2012 | - | GTGACCTATGCACCAGACGTGGGGGCTTGGTGCCTCAGCAGCACCTGGCCTGGAGTTGAAGATCGGAAGAGCGGTTTCAG   |
| chr5  | 176523238 | 176523277 | FGFR4_2013 | - | GTGACCTATGCACCAGACGTGAGGAGGGCCTCAGTGCAGATCCACAGGTCCTCGCTAGATCGGAAGAGCGGTTTCAG      |
| chr5  | 176523555 | 176523594 | FGFR4_2014 | - | GTGACCTATGCACCAGACGTGGCCAGGGCTCAGTGTGGCTCAGCGCCCTCCCAGCAGCCGAGATCGGAAGAGCGGTTTCAG  |
| chr5  | 176524243 | 176524282 | FGFR4_2015 | - | GTGACCTATGCACCAGACGTTGGGGCGGAGGTTACAGGGAGCCCTCAGGCCTCAGGAGGAGATCGGAAGAGCGGTTTCAG   |
| chr5  | 176524478 | 176524517 | FGFR4_2016 | - | GTGACCTATGCACCAGACGTCCGAGCTGGTCAAGCTCTGCAGCGCCCGGATGGGACGGGAGATCGGAAGAGCGGTTTCAG   |
| chr13 | 28877254  | 28877293  | FLT1_2017  | - | GTGACCTATGCACCAGACGTGAAGCCTTATTTCTAGAAGCACATGTGTATTTATACCCCAAGATCGGAAGAGCGGTTTCAG  |
| chr13 | 28880765  | 28880804  | FLT1_2018  | - | GTGACCTATGCACCAGACGTGGTATCTTTCTGTGATCAGTTGATGGAGGGGTACGAGGGAGATCGGAAGAGCGGTTTCAG   |
| chr13 | 28882930  | 28882969  | FLT1_2019  | - | GTGACCTATGCACCAGACGTAAGTTAAGGTACCTAGTGCACCCCGATAGACCCCTTCTTTCAGATCGGAAGAGCGGTTTCAG |
| chr13 | 28886080  | 28886119  | FLT1_2020  | - | GTGACCTATGCACCAGACGTATTTATTTACATCAAATGCCCTTGAATGTACGTCAAGGGAGATCGGAAGAGCGGTTTCAG   |
| chr13 | 28891585  | 28891624  | FLT1_2021  | - | GTGACCTATGCACCAGACGTGGTGCCTCTGCTCCCATCTGACAGCTCGCTTTTACCAGATCGGAAGAGCGGTTTCAG      |
| chr13 | 28893510  | 28893549  | FLT1_2022  | - | GTGACCTATGCACCAGACGTGAGAAGGAAGAAATCAAACAGCCCAAGAAATAATGTCTGCAGATCGGAAGAGCGGTTTCAG  |
| chr13 | 28895550  | 28895589  | FLT1_2023  | - | GTGACCTATGCACCAGACGTTTGTATTTTATTTGACTCATGTGTCTTACATCTTTAAAGATCGGAAGAGCGGTTTCAG     |
| chr13 | 28896349  | 28896388  | FLT1_2024  | - | GTGACCTATGCACCAGACGTGTTTACTGTTTTCTCTCTGCGGAGGCTGGACACACAAGATCGGAAGAGCGGTTTCAG      |
| chr13 | 28896877  | 28896916  | FLT1_2025  | - | GTGACCTATGCACCAGACGTATTCCTTCTGTCTACGCGCTGAGATTTTTTACAACATAGATCGGAAGAGCGGTTTCAG     |
| chr13 | 28901549  | 28901588  | FLT1_2026  | - | GTGACCTATGCACCAGACGTCAAAGTTGGAGGTTTTTAAAGATAGCAATGAGTTTTTATAGATCGGAAGAGCGGTTTCAG   |
| chr13 | 28903702  | 28903741  | FLT1_2027  | - | GTGACCTATGCACCAGACGTAGGGGAGGGCCGCTCCGCTCTCCCTGCACAGGCTGGGAAGATCGGAAGAGCGGTTTCAG    |
| chr13 | 28908112  | 28908151  | FLT1_2028  | - | GTGACCTATGCACCAGACGTTGATTTTGGCTTTCAACTGACCCATCACCATTTTGCATTAGATCGGAAGAGCGGTTTCAG   |
| chr13 | 28919532  | 28919571  | FLT1_2029  | - | GTGACCTATGCACCAGACGTAGGTGATGTTCTGCTCCTTTTACATATATCTAAAAGATCGGAAGAGCGGTTTCAG        |
| chr13 | 28931641  | 28931680  | FLT1_2030  | - | GTGACCTATGCACCAGACGTGCTTAAAGAAACAAGAAATTTGGTCAGACATCTATTTTCAGATCGGAAGAGCGGTTTCAG   |

|       |           |           |              |   |                                                                                            |
|-------|-----------|-----------|--------------|---|--------------------------------------------------------------------------------------------|
| chr13 | 28958972  | 28959011  | FLT1_2031    | - | GTGACCTATGCACCAGACGTTTTTTTTCTCCATTATTATTTCTCATCTTTTCATCAGCCAGATCGGAAGAGCGGTTTCAG           |
| chr13 | 28963883  | 28963922  | FLT1_2032    | - | GTGACCTATGCACCAGACGCTCAACAAAAAGGCTGTTTTCTCTCGATCTCCAAATTTAAAGATCGGAAGAGCGGTTTCAG           |
| chr13 | 28971047  | 28971086  | FLT1_2033    | - | GTGACCTATGCACCAGACGTCATCCTATAACCAGAGACAGCCTGGTGACTTCATTCTCTCAGATCGGAAGAGCGGTTTCAG          |
| chr13 | 28979867  | 28979906  | FLT1_2034    | - | GTGACCTATGCACCAGACGTTAAAAATGCGCACTGGGATATTATCCACAAATACACTCAGATCGGAAGAGCGGTTTCAG            |
| chr13 | 29001246  | 29001285  | FLT1_2035    | - | GTGACCTATGCACCAGACGTTCACTTTTTTACTAATCTTTCAAATACTTTTTGACACCTGAGATCGGAAGAGCGGTTTCAG          |
| chr13 | 29001839  | 29001878  | FLT1_2036    | - | GTGACCTATGCACCAGACGTTGTTCTATCTTTCTCTGGTTCTGGTAGGCAACAAATTAGAGATCGGAAGAGCGGTTTCAG           |
| chr13 | 29004137  | 29004176  | FLT1_2037    | - | GTGACCTATGCACCAGACGTCCTTATTTCCATAACAGTTTAAAGACATACTTTGTAAGTGAGATCGGAAGAGCGGTTTCAG          |
| chr13 | 29005223  | 29005262  | FLT1_2038    | - | GTGACCTATGCACCAGACGTTTTCAGCGTTGCCAATCATGCTATGCTTTCTAATCATTGTAGATCGGAAGAGCGGTTTCAG          |
| chr13 | 29007906  | 29007945  | FLT1_2039    | - | GTGACCTATGCACCAGACGTCATTTTTCTATTTCTTCTGCAGGACAGTATTTAAGCAAGAGATCGGAAGAGCGGTTTCAG           |
| chr13 | 29008145  | 29008184  | FLT1_2040    | - | GTGACCTATGCACCAGACGCTTCAAAGGCATGAACATAAGCCGAAGTGCTCTGTATTTAGATCGGAAGAGCGGTTTCAG            |
| chr13 | 29012308  | 29012347  | FLT1_2041    | - | GTGACCTATGCACCAGACGTACACCGCTATTCTCAGCATACTTTCACTGCAAATAAGCATAGATCGGAAGAGCGGTTTCAG          |
| chr13 | 29040990  | 29041029  | FLT1_2042    | - | GTGACCTATGCACCAGACGTCATTTTTCTACATTTGTTTGGCTTTTGCTTTGCAAATGAGTAGATCGGAAGAGCGGTTTCAG         |
| chr13 | 29041608  | 29041647  | FLT1_2043    | - | GTGACCTATGCACCAGACGTTGTTGGTTGGTAAATCTAGTTGCCATGCCCTAAGGCAAGATCGGAAGAGCGGTTTCAG             |
| chr13 | 29068867  | 29068906  | FLT1_2044    | - | GTGACCTATGCACCAGACGTGCTGGGGGCCGGGGCCTGAGGCGGGCTGCGATGGGGCGGCAGATCGGAAGAGCGGTTTCAG          |
| chr13 | 41133610  | 41133649  | FOXO1_2045   | - | GTGACCTATGCACCAGACGTGCAGGTAAGTTCACCCCAATATCAAAGACCTTTTGAAAAAGATCGGAAGAGCGGTTTCAG           |
| chr13 | 41239670  | 41239709  | FOXO1_2046   | - | GTGACCTATGCACCAGACGTTCCGGCGCGCGGCCGGACCTTTGGGGCGCGGTTGGTCCAGCAGATCGGAAGAGCGGTTTCAG         |
| chr13 | 41134056  | 41134095  | FOXO1_2047   | - | GTGACCTATGCACCAGACGTATCTCATAACAAAATGATGAATCCAGCTCCCATACCACAGATCGGAAGAGCGGTTTCAG            |
| chr13 | 41134502  | 41134541  | FOXO1_2048   | - | GTGACCTATGCACCAGACGTTCTGAGATAAGCAATCCGAAAAAATCGAAAAATCTTTTGAGATCGGAAGAGCGGTTTCAG           |
| chr15 | 66679636  | 66679675  | MAP2K1_2049  | - | GTGACCTATGCACCAGACGTGTTAAGCGCTTCCAACCTCCGGGGGAGGGCAGCACCTCTAGATCGGAAGAGCGGTTTCAG           |
| chr15 | 66727315  | 66727354  | MAP2K1_2050  | - | GTGACCTATGCACCAGACGTGTTGGGGAGCACAAGTCAATACTGTCACCAGAGAAGTCAACAGATCGGAAGAGCGGTTTCAG         |
| chr15 | 66729034  | 66729073  | MAP2K1_2051  | - | GTGACCTATGCACCAGACGTGTGGGAAGAAAGAGAGGTTTTATGAAAGAAAGAGGGAGGAAAGATCGGAAGAGCGGTTTCAG         |
| chr15 | 66735568  | 66735607  | MAP2K1_2052  | - | GTGACCTATGCACCAGACGTGAATACCAGACCAGTTAGTGACAATGTTCTAATACTTCTAGATCGGAAGAGCGGTTTCAG           |
| chr15 | 66736944  | 66736983  | MAP2K1_2053  | - | GTGACCTATGCACCAGACGTGGGAATGTAAGAAAGAAAGAAATACTGGTGATAAGAAAAAGATCGGAAGAGCGGTTTCAG           |
| chr15 | 66774043  | 66774082  | MAP2K1_2054  | - | GTGACCTATGCACCAGACGTGAGAAAATGAAAAGAGGGAAGTACACAGGTAGATTGAGATCGGAAGAGCGGTTTCAG              |
| chr15 | 66777278  | 66777317  | MAP2K1_2055  | - | GTGACCTATGCACCAGACGTGACAGACAGTGATAATCACCTAACCTAAGTTGGACCCCTGAGATCGGAAGAGCGGTTTCAG          |
| chr15 | 66779516  | 66779555  | MAP2K1_2056  | - | GTGACCTATGCACCAGACGTTATAAAAAGAAAAAATCTTCTCAGAAACAGATTACTTGATAGATCGGAAGAGCGGTTTCAG          |
| chr15 | 66781503  | 66781542  | MAP2K1_2057  | - | GTGACCTATGCACCAGACGTGTTGAGATAAGAAAAATGCCCTGGCTCCTTGCTCCAGCCAGATCGGAAGAGCGGTTTCAG           |
| chr15 | 66782006  | 66782045  | MAP2K1_2058  | - | GTGACCTATGCACCAGACGTGAAAGACAAGGTAAGAGCTGTTGCCCTGGCACTGGTTCTAGAGATCGGAAGAGCGGTTTCAG         |
| chr15 | 66782790  | 66782829  | MAP2K1_2059  | - | GTGACCTATGCACCAGACGTGGAAAGCAGGAGAGCTGGTGTGTAAGAAAGAAAAACAAACAGATCGGAAGAGCGGTTTCAG          |
| chr19 | 52693300  | 52693339  | PPP2R1A_2060 | - | GTGACCTATGCACCAGACGTTCCCTTTCTGTCAAGCTGCGGGCAGCGCTGTGCTGAAACAGATCGGAAGAGCGGTTTCAG           |
| chr19 | 52705147  | 52705186  | PPP2R1A_2061 | - | GTGACCTATGCACCAGACGTAACAAGAAGAGGAGGGGAGAATGTTAGAATCCCAGACACAGATCGGAAGAGCGGTTTCAG           |
| chr19 | 52709166  | 52709205  | PPP2R1A_2062 | - | GTGACCTATGCACCAGACGTAAGACAGACTTCGTGACTATCCATCTCAACTCTGACCCAGATCGGAAGAGCGGTTTCAG            |
| chr19 | 52714463  | 52714502  | PPP2R1A_2063 | - | GTGACCTATGCACCAGACGTAACAACAAAGTCACTGGACAGCTCCCTCTCCACCATCCGCAAGATCGGAAGAGCGGTTTCAG         |
| chr19 | 52716158  | 52716197  | PPP2R1A_2064 | - | GTGACCTATGCACCAGACGTGAGAGGAACAGTGGGAGGGCAGCAGAGGCCCTGCTGAGCTAGATCGGAAGAGCGGTTTCAG          |
| chr19 | 52718982  | 52719021  | PPP2R1A_2065 | - | GTGACCTATGCACCAGACGTGAGAGGAGGAGGAGGAGTGAGAGGGCTGGCAGTTACTAGATCGGAAGAGCGGTTTCAG             |
| chr19 | 52719207  | 52719246  | PPP2R1A_2066 | - | GTGACCTATGCACCAGACGTGAGAGGGAGGGCAAGGGGAAGTGAGACCTGATGTGCTAGTAGATCGGAAGAGCGGTTTCAG          |
| chr19 | 52719732  | 52719771  | PPP2R1A_2067 | - | GTGACCTATGCACCAGACGTGAAGAGGCAGGCACAGGGGTGAGTGAACCCCTGCAGCAGAGATCGGAAGAGCGGTTTCAG           |
| chr19 | 52722894  | 52722933  | PPP2R1A_2068 | - | GTGACCTATGCACCAGACGTGAAAGAAGGATTCTGAGAGAAATGCAATGCACACAGCAACCAGATCGGAAGAGCGGTTTCAG         |
| chr19 | 52723392  | 52723431  | PPP2R1A_2069 | - | GTGACCTATGCACCAGACGTAACCAAGGGTTCCAAGGTAAGCGTTCCAGGAGAGCAAAACAAGATCGGAAGAGCGGTTTCAG         |
| chr19 | 52724182  | 52724221  | PPP2R1A_2070 | - | GTGACCTATGCACCAGACGTGTGAGGGTGAGAGAGACAGGGATTGGAGTGAAAGACTGAGATCGGAAGAGCGGTTTCAG            |
| chr19 | 52725302  | 52725341  | PPP2R1A_2071 | - | GTGACCTATGCACCAGACGTGTGAGTGGCAGGGGTGAGTATGCCAAAGCTCCTGGCTCCTGCTAATACTAGATCGGAAGAGCGGTTTCAG |
| chr19 | 52728920  | 52728959  | PPP2R1A_2072 | - | GTGACCTATGCACCAGACGTAAGGAGACAGGGAGAGAGGGTGAGCCAGGATGGACTGAGATCGGAAGAGCGGTTTCAG             |
| chr19 | 52729168  | 52729207  | PPP2R1A_2073 | - | GTGACCTATGCACCAGACGTAGGAACAGGCAAGAATCAGAACAGACCCCTCTCTGCCAGATCGGAAGAGCGGTTTCAG             |
| chr1  | 186644980 | 186645019 | PTGS2_2074   | - | GTGACCTATGCACCAGACGTTTATTGAAAACCAAAACAAAAGACTAGTCAGTAACCTTTAGAGATCGGAAGAGCGGTTTCAG         |
| chr1  | 186645549 | 186645588 | PTGS2_2075   | - | GTGACCTATGCACCAGACGTAATGATTATATAAAACCCTCTCCCAAGGGAAAAATTAGAGATCGGAAGAGCGGTTTCAG            |
| chr1  | 186645915 | 186645954 | PTGS2_2076   | - | GTGACCTATGCACCAGACGTTTATGACTTAAAGACTTAGTTATACCCTTATACCATAACCATAAGATCGGAAGAGCGGTTTCAG       |
| chr1  | 186646731 | 186646770 | PTGS2_2077   | - | GTGACCTATGCACCAGACGTGTTAATATCTTAGAGTTAGTAAATATAACCAATCATAGAGATCGGAAGAGCGGTTTCAG            |
| chr1  | 186647343 | 186647382 | PTGS2_2078   | - | GTGACCTATGCACCAGACGTAGAATCCATTAGAGATGTATTAATAAGACGGGCTGCAAGATCGGAAGAGCGGTTTCAG             |
| chr1  | 186648140 | 186648179 | PTGS2_2079   | - | GTGACCTATGCACCAGACGTGTGTCTTTCTAAGGTTTTAGCCTTCTCAAAGAAAAATATAGATCGGAAGAGCGGTTTCAG           |
| chr1  | 186648404 | 186648443 | PTGS2_2080   | - | GTGACCTATGCACCAGACGTCTTTGGTTGCCTCATTAGGAGTGGGGCTGGATACAGTTAAGATCGGAAGAGCGGTTTCAG           |
| chr1  | 186649321 | 186649360 | PTGS2_2081   | - | GTGACCTATGCACCAGACGTGGCGCCGCGCACCGGGACTCCGGTCCACGACCCGGGCAGATCGGAAGAGCGGTTTCAG             |
| chr1  | 154936229 | 154936268 | SHC1_2082    | - | GTGACCTATGCACCAGACGTGCTCTCTCCAGAGATGCCCTCCAATCTTTCCACCTAGATCGGAAGAGCGGTTTCAG               |
| chr1  | 154937969 | 154938008 | SHC1_2083    | - | GTGACCTATGCACCAGACGTGAGAGGTGTGGGTGAGGGGTGGCAAAAAGGAAGGTACAGTAGATCGGAAGAGCGGTTTCAG          |
| chr1  | 154938372 | 154938411 | SHC1_2084    | - | GTGACCTATGCACCAGACGTGCTCTCTCTCTCTGTCATCCCCACCTTTCTACTTGGTTTCAGATCGGAAGAGCGGTTTCAG          |
| chr1  | 154938588 | 154938627 | SHC1_2085    | - | GTGACCTATGCACCAGACGTAGCCGAGATAGGCAGAGCTGGGGAGTGTGGAGGCAGGGCAGATCGGAAGAGCGGTTTCAG           |
| chr1  | 154938745 | 154938784 | SHC1_2086    | - | GTGACCTATGCACCAGACGTTGGATGGAGGCGGGCTGGGGCTAGGTTGGAGTGGTTGGTAGATCGGAAGAGCGGTTTCAG           |
| chr1  | 154940097 | 154940136 | SHC1_2087    | - | GTGACCTATGCACCAGACGTGGGGAGAGTGGGAGGCTCTTGATTAGGATTAGGAAAAAGATCGGAAGAGCGGTTTCAG             |
| chr1  | 154940406 | 154940445 | SHC1_2088    | - | GTGACCTATGCACCAGACGTGGGGGACACTGGGTGGCTGGCTGTTTGGAGAGGTGAAGATCGGAAGAGCGGTTTCAG              |

|      |           |           |           |   |                                                                                      |
|------|-----------|-----------|-----------|---|--------------------------------------------------------------------------------------|
| chr1 | 154940630 | 154940669 | SHC1_2089 | - | GTGACCTATGCACCAGACGTGAACAGAGCAAAGGCGGTGGGAGAAGAGCAAGGGGCTAGGAGATCGGAAGAGCGGTTTCAG    |
| chr1 | 154940921 | 154940960 | SHC1_2090 | - | GTGACCTATGCACCAGACGTGTGGGCAGACGACCAGAAACTGATGGGGTCTAAGGAGATCGGAAGAGCGGTTTCAG         |
| chr1 | 154941197 | 154941236 | SHC1_2091 | - | GTGACCTATGCACCAGACGTTCCTTGGGGATAGGGATGCTGCTGGGAAATGTGGAGGGGCAGATCGGAAGAGCGGTTTCAG    |
| chr1 | 154941804 | 154941843 | SHC1_2092 | - | GTGACCTATGCACCAGACGTAGGGAGTGGATTGTGGGAGTCTGGGATTAGTGAGGCCATAGATCGGAAGAGCGGTTTCAG     |
| chr1 | 154942458 | 154942497 | SHC1_2093 | - | GTGACCTATGCACCAGACGTATCCTCCTCTCCATTCCCCCGCAGACCCCTCCAGTTCTAAGATCGGAAGAGCGGTTTCAG     |
| chr2 | 1418131   | 1418170   | TPO_2094  | - | GTGACCTATGCACCAGACGTACGGAAGGAGACAGATGTAATCAAGCACTGACAAGGCAGATCGGAAGAGCGGTTTCAG       |
| chr2 | 1426767   | 1426806   | TPO_2095  | - | GTGACCTATGCACCAGACGTGAATGTCCACACAGTCAAAGCGCAATGACAGTTACAGGATTAGATCGGAAGAGCGGTTTCAG   |
| chr2 | 1437160   | 1437199   | TPO_2096  | - | GTGACCTATGCACCAGACGTAAAGAAGATATAAAATAGATTATTTGTCTATGTTATCTTAGATCGGAAGAGCGGTTTCAG     |
| chr2 | 1439974   | 1440013   | TPO_2097  | - | GTGACCTATGCACCAGACGTTAGGAAACCATGAATCTGTGCTTGTAAACCACAAATCCACAGATCGGAAGAGCGGTTTCAG    |
| chr2 | 1457416   | 1457455   | TPO_2098  | - | GTGACCTATGCACCAGACGTAAATGCAAGGATGTGTTTGAGATGGGGGAGAAGAACACAGAGATCGGAAGAGCGGTTTCAG    |
| chr2 | 1459798   | 1459837   | TPO_2099  | - | GTGACCTATGCACCAGACGTAGAGACCATTGGTCAGGACATAGGAGGACCCCTGTGGTAGCAGATCGGAAGAGCGGTTTCAG   |
| chr2 | 1480808   | 1480847   | TPO_2100  | - | GTGACCTATGCACCAGACGTAGGGGAGTTCAAGTCAACCCAGGGCCCCCGTGCACCTTTAGATCGGAAGAGCGGTTTCAG     |
| chr2 | 1488318   | 1488357   | TPO_2101  | - | GTGACCTATGCACCAGACGTAGGAAAAGCATCTCAGTAGGGCCAGGATACCAGAGGAGAGATCGGAAGAGCGGTTTCAG      |
| chr2 | 1491543   | 1491582   | TPO_2102  | - | GTGACCTATGCACCAGACGTCCATGCACAAGGCAAGGACAGCTCTTGGCTCAGTTCTAGAAGATCGGAAGAGCGGTTTCAG    |
| chr2 | 1497524   | 1497563   | TPO_2103  | - | GTGACCTATGCACCAGACGTGAGAGGCTGCAGGGTTTCTCTCACAGAACTGAATTTTGTAGATCGGAAGAGCGGTTTCAG     |
| chr2 | 1499711   | 1499750   | TPO_2104  | - | GTGACCTATGCACCAGACGTGGAGACAGTGAAGTAAAGTCAAGTGCATGGAGAACCCTCAAGATCGGAAGAGCGGTTTCAG    |
| chr2 | 1500317   | 1500356   | TPO_2105  | - | GTGACCTATGCACCAGACGTTGGCAGCGTTGACATGTAGTCAAATACGAGAAAAAGAAAAGATCGGAAGAGCGGTTTCAG     |
| chr2 | 1507670   | 1507709   | TPO_2106  | - | GTGACCTATGCACCAGACGTGCAAGGCCACACAGCTGAGAGGAAGCGGCTGCACCCCAAGATCGGAAGAGCGGTTTCAG      |
| chr2 | 1520605   | 1520644   | TPO_2107  | - | GTGACCTATGCACCAGACGTGAAAAGAGCCCTGGTTAGAAGAACCCTCCAGGGCCTGGGCAAGATCGGAAGAGCGGTTTCAG   |
| chr2 | 1544316   | 1544355   | TPO_2108  | - | GTGACCTATGCACCAGACGTACGTGTCAGTTATCGGGAGAGGGTCCGGCACCGTGACTAGATCGGAAGAGCGGTTTCAG      |
| chr2 | 1546143   | 1546182   | TPO_2109  | - | GTGACCTATGCACCAGACGTGCAGAAACAACATTAATAACGTCTGAATCTGACTGCTCCAGATCGGAAGAGCGGTTTCAG     |
| chr2 | 1481067   | 1481106   | TPO_2110  | - | GTGACCTATGCACCAGACGTGAGGCGCGCTGGACGCGGAGCAGCCCTCCGGCACTGGTCAGATCGGAAGAGCGGTTTCAG     |
| chr9 | 100437671 | 100437710 | XPA_2111  | - | GTGACCTATGCACCAGACGTGAGTGCCTGTTTATAGAAATTTATATTTAAATAAAGGAAGATCGGAAGAGCGGTTTCAG      |
| chr9 | 100447155 | 100447194 | XPA_2112  | - | GTGACCTATGCACCAGACGTACATTTTATATGCTGAAGGATGTGTTTACCATTGCAAGATCGGAAGAGCGGTTTCAG        |
| chr9 | 100449328 | 100449367 | XPA_2113  | - | GTGACCTATGCACCAGACGTAGTTGTATTTATTTTACTCTGGTAAATCTTAATAAGATCGGAAGAGCGGTTTCAG          |
| chr9 | 100451766 | 100451805 | XPA_2114  | - | GTGACCTATGCACCAGACGTTAGATGGTGTCTTAATTGCTAATGTTTATGTAGGTTTATAGATCGGAAGAGCGGTTTCAG     |
| chr9 | 100455881 | 100455920 | XPA_2115  | - | GTGACCTATGCACCAGACGTTTTTCCAAAAATAAGTATCTAGATTGGTTATTTTGTAGTAAAGATCGGAAGAGCGGTTTCAG   |
| chr9 | 100459353 | 100459392 | XPA_2116  | - | GTGACCTATGCACCAGACGTGCTCCGCGCTTCCCTTCCCTCTCCCGCCTCCCGGTCAGATCGGAAGAGCGGTTTCAG        |
| chr3 | 14187391  | 14187430  | XPC_2117  | - | GTGACCTATGCACCAGACGTACTAGAGGGCACCACCACTGCTGCTGCCCACTACAAGATCGGAAGAGCGGTTTCAG         |
| chr3 | 14188740  | 14188779  | XPC_2118  | - | GTGACCTATGCACCAGACGTGTTTGCAGAGAAGCAAGCTCAGGGTCAAGTTCTTGAGATCGGAAGAGCGGTTTCAG         |
| chr3 | 14189358  | 14189397  | XPC_2119  | - | GTGACCTATGCACCAGACGTATGACAGGACTGAGGGACAGCAGAAGCGGGAAGCAACACTCAGATCGGAAGAGCGGTTTCAG   |
| chr3 | 14190012  | 14190051  | XPC_2120  | - | GTGACCTATGCACCAGACGTGGCCTTCGATGGAGGCTAAACACAGGGATGGGGAGGGGTGAGATCGGAAGAGCGGTTTCAG    |
| chr3 | 14190264  | 14190303  | XPC_2121  | - | GTGACCTATGCACCAGACGTATCAGAAAGGGCTCAGGACCAGGCCCTGTTCCCTGCAGATCGGAAGAGCGGTTTCAG        |
| chr3 | 14193785  | 14193824  | XPC_2122  | - | GTGACCTATGCACCAGACGTCTGGGGGCTCCCTGTGGGAGTGGTGACACAGGCCCTGTAGATCGGAAGAGCGGTTTCAG      |
| chr3 | 14197785  | 14197824  | XPC_2123  | - | GTGACCTATGCACCAGACGTGACGCTGGTTGGCTCAGGGGCTTCTGATGGCATGGATAGATCGGAAGAGCGGTTTCAG       |
| chr3 | 14201191  | 14201230  | XPC_2124  | - | GTGACCTATGCACCAGACGTGAGGGCTGCCAGAGAAGAGGAGCAATTGACAGGAAATTTAGATCGGAAGAGCGGTTTCAG     |
| chr3 | 14206263  | 14206302  | XPC_2125  | - | GTGACCTATGCACCAGACGTCTCCCGGATCACTGTTTTTATCAGTACTGTTAACTAATGAGATCGGAAGAGCGGTTTCAG     |
| chr3 | 14206878  | 14206917  | XPC_2126  | - | GTGACCTATGCACCAGACGTCCGCTGTCTGCTGCAGAGCTGGGGAGTGTAGGATTTGTGTTAGATCGGAAGAGCGGTTTCAG   |
| chr3 | 14208619  | 14208658  | XPC_2127  | - | GTGACCTATGCACCAGACGTGGAATGATGGGGAAGGACTTTTCTTGTGCGGTGCAAGAGAGATCGGAAGAGCGGTTTCAG     |
| chr3 | 14209707  | 14209746  | XPC_2128  | - | GTGACCTATGCACCAGACGTGCCCTTGCCTTAGGCTCCTGTACATGCAGTAGGCAACAAGATCGGAAGAGCGGTTTCAG      |
| chr3 | 14211888  | 14211927  | XPC_2129  | - | GTGACCTATGCACCAGACGTTTTCTTTCTTTTCCAGAACTGTTTGGTCTGTTTTGTTTTTGTAGATCGGAAGAGCGGTTTCAG  |
| chr3 | 14211895  | 14211934  | XPC_2130  | - | GTGACCTATGCACCAGACGTAAACATCTTTCTTTGTTTTCCAGAACTGTTTGGTCTGTTTGTAGATCGGAAGAGCGGTTTCAG  |
| chr3 | 14214317  | 14214356  | XPC_2131  | - | GTGACCTATGCACCAGACGTTGCAAAAGCTTGTCTCGGGTCTTGATTTTTCTCATCAGAGAGATCGGAAGAGCGGTTTCAG    |
| chr3 | 14219916  | 14219955  | XPC_2132  | - | GTGACCTATGCACCAGACGTGGCCAGCGGGCTTCGCGGGAGACGCCCGGTTGGGCGGAAGATCGGAAGAGCGGTTTCAG      |
| chr3 | 14199902  | 14199941  | XPC_2133  | - | GTGACCTATGCACCAGACGTAGATGGCTCCAGGACCCATCGGGAGCCATCGTAAGGAAGATCGGAAGAGCGGTTTCAG       |
| chr6 | 69348518  | 69348557  | BAI3_2134 | - | GTGACCTATGCACCAGACGTTTGGCTGTAAAATGGCAATGAAAGTAAATGCAAGTAGAGATCGGAAGAGCGGTTTCAG       |
| chr6 | 69640401  | 69640440  | BAI3_2135 | - | GTGACCTATGCACCAGACGTAATAAAGGTATATGAAAGCTTGTGTGTAGACATTTCTCACAGATCGGAAGAGCGGTTTCAG    |
| chr6 | 69646361  | 69646400  | BAI3_2136 | - | GTGACCTATGCACCAGACGTGACAACAATAAACATGAAACTGTCTTAAGTATTATCATCAGATCGGAAGAGCGGTTTCAG     |
| chr6 | 69653672  | 69653711  | BAI3_2137 | - | GTGACCTATGCACCAGACGTGCAAAAGAAGCTTCAACAACAAAACAGAGCAGTAAATCAAGATCGGAAGAGCGGTTTCAG     |
| chr6 | 69665866  | 69665905  | BAI3_2138 | - | GTGACCTATGCACCAGACGTAGAAAAAGAGACAGCATGAGGATATCTTCCAATAGGACAAAGATCGGAAGAGCGGTTTCAG    |
| chr6 | 69666487  | 69666526  | BAI3_2139 | - | GTGACCTATGCACCAGACGTTGTTCTGATGTCATGTCACTATCCACACACTCCTTAGATCGGAAGAGCGGTTTCAG         |
| chr6 | 69684605  | 69684644  | BAI3_2140 | - | GTGACCTATGCACCAGACGTAACAAGGGACCTGAAATGTGACGTAGTGTGTTTTAAAAAATTTAGATCGGAAGAGCGGTTTCAG |
| chr6 | 69685076  | 69685115  | BAI3_2141 | - | GTGACCTATGCACCAGACGTCAAAGAACAGAGAGAAGCTTTATAATAGGGATGTTTGAAGAGATCGGAAGAGCGGTTTCAG    |
| chr6 | 69703610  | 69703649  | BAI3_2142 | - | GTGACCTATGCACCAGACGTCAAAGAACAGAGCAAACATCAGAATCTTCTTACCATTAGATCGGAAGAGCGGTTTCAG       |
| chr6 | 69723880  | 69723919  | BAI3_2143 | - | GTGACCTATGCACCAGACGTAATTAGATAAAAGATTAAATATACATGAGAGAATTATACAGATCGGAAGAGCGGTTTCAG     |
| chr6 | 69728233  | 69728272  | BAI3_2144 | - | GTGACCTATGCACCAGACGTAAGCAAAGTTAGAAGGAATAAAAAATCTATACATAAATAGATCGGAAGAGCGGTTTCAG      |
| chr6 | 69758027  | 69758066  | BAI3_2145 | - | GTGACCTATGCACCAGACGTTAAATTTGAAGTATTGACAAACAGCAAGAAAATACTATGAGATCGGAAGAGCGGTTTCAG     |
| chr6 | 69759113  | 69759152  | BAI3_2146 | - | GTGACCTATGCACCAGACGTTAAATTTGAAGTATTGACAAACAGCAAGAAAATACTATGAGATCGGAAGAGCGGTTTCAG     |

|       |           |           |            |   |                                                                                           |
|-------|-----------|-----------|------------|---|-------------------------------------------------------------------------------------------|
| chr6  | 69772776  | 69772815  | BAI3_2147  | - | GTGACCTATGCACCAGACGTGTAATTATAATTAAGGAGAAATGAGTGCTGAAAAGTATAGATCGGAAGAGCGGTTTCAG           |
| chr6  | 69785837  | 69785876  | BAI3_2148  | - | GTGACCTATGCACCAGACGTAGCAGAGAAAGAATGCATATATCTTGAGTACATATATAAAAAGATCGGAAGAGCGGTTTCAG        |
| chr6  | 69943132  | 69943171  | BAI3_2149  | - | GTGACCTATGCACCAGACGTGAGTGAGGGGGGAGGAAATCGGGATAAATACGCCTGATAGAGATCGGAAGAGCGGTTTCAG         |
| chr6  | 69944874  | 69944913  | BAI3_2150  | - | GTGACCTATGCACCAGACGTAAACAAAAACAAAAAGAAACAAATTGGTTTTTAATAAATTAAGATCGGAAGAGCGGTTTCAG        |
| chr6  | 69948966  | 69949005  | BAI3_2151  | - | GTGACCTATGCACCAGACGTAGAGAAAAGTTACCCAACCTTTAAAAATCCAACAGAAAGATGAGATCGGAAGAGCGGTTTCAG       |
| chr6  | 70034714  | 70034753  | BAI3_2152  | - | GTGACCTATGCACCAGACGTAAACAAAAACAAAAAGACTCACACTGAACCTGGGAGAGGGAAAAGATCGGAAGAGCGGTTTCAG      |
| chr6  | 70037662  | 70037701  | BAI3_2153  | - | GTGACCTATGCACCAGACGTAGCAATGTACGCATCATATTAGCTATAACCACACTATGCAGATCGGAAGAGCGGTTTCAG          |
| chr6  | 70040348  | 70040387  | BAI3_2154  | - | GTGACCTATGCACCAGACGTATTAGATAAGAACAACAAAAATTAAGTGACAAGTATTAGAGATCGGAAGAGCGGTTTCAG          |
| chr6  | 70042765  | 70042804  | BAI3_2155  | - | GTGACCTATGCACCAGACGTGAAACAAAGTTGACCTTTCAATGATATTGAAGGGAATCAGAGATCGGAAGAGCGGTTTCAG         |
| chr6  | 70048758  | 70048797  | BAI3_2156  | - | GTGACCTATGCACCAGACGTACAGAACACCCACAAAAAGAACAAAAATTTGAATTTGCACAGATCGGAAGAGCGGTTTCAG         |
| chr6  | 70049175  | 70049214  | BAI3_2157  | - | GTGACCTATGCACCAGACGTCAAGAAAAGTAACATTACGTAGCTATACATCACACCCCAGGAGATCGGAAGAGCGGTTTCAG        |
| chr6  | 70064075  | 70064114  | BAI3_2158  | - | GTGACCTATGCACCAGACGTGGGGAACACATTAATTTCTTCTCTCTTAATAATGACAAGAGATCGGAAGAGCGGTTTCAG          |
| chr6  | 70065663  | 70065702  | BAI3_2159  | - | GTGACCTATGCACCAGACGTAAATAATAAGACATAGAACCCATCATTTAATTGAAGACCTCAAGATCGGAAGAGCGGTTTCAG       |
| chr6  | 70070711  | 70070750  | BAI3_2160  | - | GTGACCTATGCACCAGACGTGAATGTAAGGTTGAAGAAAGAGAGTTAATGTGTGTTTATTAGATCGGAAGAGCGGTTTCAG         |
| chr6  | 70082248  | 70082287  | BAI3_2161  | - | GTGACCTATGCACCAGACGTTATTTTTAAAAAGAAAGGAGAAAAACCAATAAAGTTATGTTAGATCGGAAGAGCGGTTTCAG        |
| chr6  | 70092673  | 70092712  | BAI3_2162  | - | GTGACCTATGCACCAGACGTGAACAAGATAGCTCTCATCCCCAACCTTGATGTATGTTTTAGATCGGAAGAGCGGTTTCAG         |
| chr6  | 70098545  | 70098584  | BAI3_2163  | - | GTGACCTATGCACCAGACGTGAGAGGAAAGAGAGTCAATTTGTGATGACCAGGATCACAGATCGGAAGAGCGGTTTCAG           |
| chr6  | 69348896  | 69348935  | BAI3_2164  | - | GTGACCTATGCACCAGACGTGAGCTGTAGAAAACGAAAGACTTCTTGAATTGCAGAGTTAGATCGGAAGAGCGGTTTCAG          |
| chr6  | 70071033  | 70071072  | BAI3_2165  | - | GTGACCTATGCACCAGACGTTTTCTTTCTTGAGGATGGACTATGTCATGTCAGCCCCCTAGATCGGAAGAGCGGTTTCAG          |
| chr2  | 215593350 | 215593389 | BARD1_2166 | - | GTGACCTATGCACCAGACGTAGATGAACATTTCAAATTTGAATTTGCACGGTTTGTGAGAGAGATCGGAAGAGCGGTTTCAG        |
| chr2  | 215595085 | 215595124 | BARD1_2167 | - | GTGACCTATGCACCAGACGTTTTAATACAACCTTTCAATTTCTTCTTATTATGACATACTATTAGATCGGAAGAGCGGTTTCAG      |
| chr2  | 215609741 | 215609780 | BARD1_2168 | - | GTGACCTATGCACCAGACGTGATTTGAGAGAAATTAAGAAATGAATTAGACTAGTTTTGTTAGATCGGAAGAGCGGTTTCAG        |
| chr2  | 215610396 | 215610435 | BARD1_2169 | - | GTGACCTATGCACCAGACGTGAATTTTGGGAGGTGGGCTGAGAAAATGTTAAATAGATAGATCGGAAGAGCGGTTTCAG           |
| chr2  | 215632156 | 215632195 | BARD1_2170 | - | GTGACCTATGCACCAGACGTCAACGTAATAATTTTTAAAAATGGACCTATATTCTTGAAGATCGGAAGAGCGGTTTCAG           |
| chr2  | 215633906 | 215633945 | BARD1_2171 | - | GTGACCTATGCACCAGACGTGTTTTTATTCTCATTCTTTCTGTGTTTTACAGTCTTATAGATCGGAAGAGCGGTTTCAG           |
| chr2  | 215645234 | 215645273 | BARD1_2172 | - | GTGACCTATGCACCAGACGTTACTCTGAAATACCATCTCAGAATGAGGCCAACTATAAAGAGATCGGAAGAGCGGTTTCAG         |
| chr2  | 215656971 | 215657010 | BARD1_2173 | - | GTGACCTATGCACCAGACGTTCCCTATCTCTTCTAGTTAAATTCATAGTTAAAAACTGAAGATCGGAAGAGCGGTTTCAG          |
| chr2  | 215661735 | 215661774 | BARD1_2174 | - | GTGACCTATGCACCAGACGTACGGTTTGATGTATATAGTACAACCTGATTTTTTACTAGAAGATCGGAAGAGCGGTTTCAG         |
| chr2  | 215674086 | 215674125 | BARD1_2175 | - | GTGACCTATGCACCAGACGTAGCTTCTTGGGGTGCTGCGAGGGCACGGGTCGCACAGTAGATCGGAAGAGCGGTTTCAG           |
| chr2  | 215645709 | 215645748 | BARD1_2176 | - | GTGACCTATGCACCAGACGTGAGCAAAATAGAGTCTCCAGACACTAAGACAGGAATGAAGAGATCGGAAGAGCGGTTTCAG         |
| chr18 | 60795808  | 60795847  | BCL2_2177  | - | GTGACCTATGCACCAGACGTCTGCCCAAACAATATGCAAAAGGTTCACTAAAGCAGTAGATCGGAAGAGCGGTTTCAG            |
| chr18 | 60985232  | 60985271  | BCL2_2178  | - | GTGACCTATGCACCAGACGTCCGAGATGCGGGGGTGGAGTGCGGGTGGGCTCCTGGGGCAGATCGGAAGAGCGGTTTCAG          |
| chr18 | 60985265  | 60985304  | BCL2_2179  | - | GTGACCTATGCACCAGACGTTTGGTGATGTGAGTCTGGGCTGAGGCCACAGGTCAGATAGATCGGAAGAGCGGTTTCAG           |
| chr18 | 60985541  | 60985580  | BCL2_2180  | - | GTGACCTATGCACCAGACGTGTACCCTCCGACCTTCCGCGAGATGTCAGCCAGTCAAGATCGGAAGAGCGGTTTCAG             |
| chr18 | 60985557  | 60985596  | BCL2_2181  | - | GTGACCTATGCACCAGACGTGACGACTTCTCCCGCTTCCGCGCAGCTTCCGCGAGACTTCCGCGAGAAAGATCGGAAGAGCGGTTTCAG |
| chr19 | 11015577  | 11015616  | CARM1_2182 | - | GTGACCTATGCACCAGACGTAGACAGGCTGGCGTGAGCGGTGCAGCCCTGTCAGCTGCCTAGATCGGAAGAGCGGTTTCAG         |
| chr19 | 11018665  | 11018704  | CARM1_2183 | - | GTGACCTATGCACCAGACGTGAAGCCAAGTACCCTGGGGGGCGGTGAGCAACCCAGCATGTAGATCGGAAGAGCGGTTTCAG        |
| chr19 | 11019729  | 11019768  | CARM1_2184 | - | GTGACCTATGCACCAGACGTGACATACCGATGGCACGGGGCACATGGTGGCACGAGGCAGAGATCGGAAGAGCGGTTTCAG         |
| chr19 | 11022810  | 11022849  | CARM1_2185 | - | GTGACCTATGCACCAGACGTAGTGGGAGGTGAGAGCGAGACATAGGAGGCGACGGTGATGAGATCGGAAGAGCGGTTTCAG         |
| chr19 | 11024503  | 11024542  | CARM1_2186 | - | GTGACCTATGCACCAGACGTGCAGGGCCATGTGGCTTCCCTGCGTCTTCCATGCCATGGAGATCGGAAGAGCGGTTTCAG          |
| chr19 | 11027033  | 11027072  | CARM1_2187 | - | GTGACCTATGCACCAGACGTGGCAGGAGGGTGGCTGGCGTGACACATCCACACAGATCGGAAGAGCGGTTTCAG                |
| chr19 | 11027322  | 11027361  | CARM1_2188 | - | GTGACCTATGCACCAGACGTGCCCCACCCCCACAGCAAGGTCAGGGCTGCAGAAGAGGCAAGATCGGAAGAGCGGTTTCAG         |
| chr19 | 11030221  | 11030260  | CARM1_2189 | - | GTGACCTATGCACCAGACGTCCACAGGTGTGACGTGGCATCTGACGCCAGGGCCAGCATGAGATCGGAAGAGCGGTTTCAG         |
| chr19 | 11030503  | 11030542  | CARM1_2190 | - | GTGACCTATGCACCAGACGTAAGGGCAGTGGCTGCTGGGGAAGCCAGACAGGCGCTGCCGAGATCGGAAGAGCGGTTTCAG         |
| chr19 | 11031062  | 11031101  | CARM1_2191 | - | GTGACCTATGCACCAGACGTGGGACAGGCACATCTTACTGGCCGGCGCCACCCTGGAGATCGGAAGAGCGGTTTCAG             |
| chr19 | 11031285  | 11031324  | CARM1_2192 | - | GTGACCTATGCACCAGACGTGGTGACGGCCGTGGCATGAGCTGCTGGCAGCTGCTGGCAGATGGACCCAGATCGGAAGAGCGGTTTCAG |
| chr19 | 11031460  | 11031499  | CARM1_2193 | - | GTGACCTATGCACCAGACGTGACAGAGCCATGGGCAGGGGCAAGGGGTTGCAGGGCCGGAGATCGGAAGAGCGGTTTCAG          |
| chr19 | 11031676  | 11031715  | CARM1_2194 | - | GTGACCTATGCACCAGACGTAGAGGGAGACGTGAGGGCTGGAGGCAGAGGGGCCAGGCTAGATCGGAAGAGCGGTTTCAG          |
| chr19 | 11032001  | 11032040  | CARM1_2195 | - | GTGACCTATGCACCAGACGTAGAGGGAGGAAAGAAGGAAGGGAGACGGCGTCAACC GCCCAGATCGGAAGAGCGGTTTCAG        |
| chr19 | 11032241  | 11032280  | CARM1_2196 | - | GTGACCTATGCACCAGACGTGGCAATGGCAGTGAGGGGCTGCCCTGGCCCCGCCAGCCAGATCGGAAGAGCGGTTTCAG           |
| chr12 | 56360743  | 56360782  | CDK2_2197  | - | GTGACCTATGCACCAGACGTGAGTGGGTGACGGCCCTGGAGCGGGGCTGGGAAAGATCGGAAGAGCGGTTTCAG                |
| chr12 | 56361591  | 56361630  | CDK2_2198  | - | GTGACCTATGCACCAGACGTTTGGGAAAGCAGATGGAAATGAGTTACAAATATCTTAGATCGGAAGAGCGGTTTCAG             |
| chr12 | 56361783  | 56361822  | CDK2_2199  | - | GTGACCTATGCACCAGACGTAAAGTTTGGGAAATGGAGGTGTGTGAGAGAGAGAAATGCAGATCGGAAGAGCGGTTTCAG          |
| chr12 | 56362512  | 56362551  | CDK2_2200  | - | GTGACCTATGCACCAGACGTAGAAAGAGAGGACTGTGTTTCTCCATTACAGTGAGCAGACAGATCGGAAGAGCGGTTTCAG         |
| chr12 | 56363209  | 56363248  | CDK2_2201  | - | GTGACCTATGCACCAGACGTGGAATAGGGAGGGGCGGGGTGGTTTATAGGGTATGGAATAGATCGGAAGAGCGGTTTCAG          |
| chr12 | 56364778  | 56364817  | CDK2_2202  | - | GTGACCTATGCACCAGACGTGGAAGAGGAAATACCAAGACCACGTTGACGTGAGTCAAGATCGGAAGAGCGGTTTCAG            |
| chr12 | 56365255  | 56365294  | CDK2_2203  | - | GTGACCTATGCACCAGACGTAGATGCTGTTGACTTCAATGATGTATAGTGGACTAAATAGATCGGAAGAGCGGTTTCAG           |
| chr22 | 47082981  | 47083020  | CERK_2204  | - | GTGACCTATGCACCAGACGTTCTCTCACAAAACCTGGGAAAGTGTGAAAACATTTAAGAAGATCGGAAGAGCGGTTTCAG          |

|       |          |          |            |   |                                                                                       |
|-------|----------|----------|------------|---|---------------------------------------------------------------------------------------|
| chr22 | 47085839 | 47085878 | CERK_2205  | - | GTGACCTATGCACCAGACGTGGGTCCTCCAGCCACCAGCGCCATCCCCTTGAGCCCTGAGAGATCGGAAGAGCGGTTTCAG     |
| chr22 | 47087419 | 47087458 | CERK_2206  | - | GTGACCTATGCACCAGACGTGCTCTTGCATGGAGCCTCCACTGCGGAGTAATTTATGTTAGATCGGAAGAGCGGTTTCAG      |
| chr22 | 47089274 | 47089313 | CERK_2207  | - | GTGACCTATGCACCAGACGTAAACACAGGCTCAGTGTGTCCTGTTGTGCTGGAGTGCAGATCGGAAGAGCGGTTTCAG        |
| chr22 | 47091057 | 47091096 | CERK_2208  | - | GTGACCTATGCACCAGACGTGCTTTGTGTGTTCTCTTGCAAATGACGGGAAATGAAAGCAGATCGGAAGAGCGGTTTCAG      |
| chr22 | 47095160 | 47095199 | CERK_2209  | - | GTGACCTATGCACCAGACGTATAATGCAGACTCGCTCCCGCTGGTCTGTCGCCCGACTGCAGATCGGAAGAGCGGTTTCAG     |
| chr22 | 47097483 | 47097522 | CERK_2210  | - | GTGACCTATGCACCAGACGTCTCTGCGCATGCGCAGCGTGGCAGCCGCGGCTCCTGCGCAGATCGGAAGAGCGGTTTCAG      |
| chr22 | 47103690 | 47103729 | CERK_2211  | - | GTGACCTATGCACCAGACGTGGCCTGGCCTGCTCTGTTCTCTGTTCCCGTCTTAGGAAGATCGGAAGAGCGGTTTCAG        |
| chr22 | 47106933 | 47106972 | CERK_2212  | - | GTGACCTATGCACCAGACGTGCTCTTTTCATCGCCATCAAGTCCATTGTTAATGAAAAAGTAGATCGGAAGAGCGGTTTCAG    |
| chr22 | 47108015 | 47108054 | CERK_2213  | - | GTGACCTATGCACCAGACGTCTATGTTAATATGTAGAAGTAAGTTTGAAGATGATCAAAGATCGGAAGAGCGGTTTCAG       |
| chr22 | 47115933 | 47115972 | CERK_2214  | - | GTGACCTATGCACCAGACGTGTTTGGACTGAGAGACAGGATGGCCGTGGTGGCATGCCAAGATCGGAAGAGCGGTTTCAG      |
| chr22 | 47116749 | 47116788 | CERK_2215  | - | GTGACCTATGCACCAGACGTAAATGTCTTCTCCACATTCTTCAATTTCTATGTAGAAGATCGGAAGAGCGGTTTCAG         |
| chr11 | 46354776 | 46354815 | DGKZ_2216  | - | GTGACCTATGCACCAGACGTCTTCCGCCCGCGCTCCTGCGCCCTTTCGGCCACCCGCTAGATCGGAAGAGCGGTTTCAG       |
| chr11 | 46367027 | 46367066 | DGKZ_2217  | - | GTGACCTATGCACCAGACGTGACCCCGGCCCTCCCCTTCTCCGTCGCCAGCGCTCCAAGATCGGAAGAGCGGTTTCAG        |
| chr11 | 46387757 | 46387796 | DGKZ_2218  | - | GTGACCTATGCACCAGACGTTGGCTGTTGGGCACAGAGACCAGGAGCATCAGGAGCTGGAAGATCGGAAGAGCGGTTTCAG     |
| chr11 | 46388791 | 46388830 | DGKZ_2219  | - | GTGACCTATGCACCAGACGTGAAGACAGCTGAGGAGGGGCTGAGCATTGCTGACCCTAAGATCGGAAGAGCGGTTTCAG       |
| chr11 | 46389152 | 46389191 | DGKZ_2220  | - | GTGACCTATGCACCAGACGTGATGGGCTTGTCTCAGCACAGCTGGCCGCCACGCCCTCCAGATCGGAAGAGCGGTTTCAG      |
| chr11 | 46389502 | 46389541 | DGKZ_2221  | - | GTGACCTATGCACCAGACGTGGAAGAGAGGGCCCTGAGGCCAGCTAAGTCTATCTCGAGATCGGAAGAGCGGTTTCAG        |
| chr11 | 46389505 | 46389544 | DGKZ_2222  | - | GTGACCTATGCACCAGACGTACAGGAAGAGAGGGCCCTGAGGCAGCTAAGTCTATCAGATCGGAAGAGCGGTTTCAG         |
| chr11 | 46390994 | 46391033 | DGKZ_2223  | - | GTGACCTATGCACCAGACGTTGGCAGTGACCACCAAAATGTCAGAACCTCCCTTCGGGTGATCGGAAGAGCGGTTTCAG       |
| chr11 | 46391441 | 46391480 | DGKZ_2224  | - | GTGACCTATGCACCAGACGTAGGGGAAAAATTTCACTGGGTGAGGGGTGGGCAGGGGCACAGATCGGAAGAGCGGTTTCAG     |
| chr11 | 46392813 | 46392852 | DGKZ_2225  | - | GTGACCTATGCACCAGACGTACAGGATGATGGGAACCAGGCAGGCTGGAGCAGCAGAAAGATCGGAAGAGCGGTTTCAG       |
| chr11 | 46392987 | 46393026 | DGKZ_2226  | - | GTGACCTATGCACCAGACGTGAGGGGCCGGGCTCAGCGGGACCGTGTTCAGACTCGGGGAGATCGGAAGAGCGGTTTCAG      |
| chr11 | 46393204 | 46393243 | DGKZ_2227  | - | GTGACCTATGCACCAGACGTAGCAGGGGTGTTGGTGACGAGGTGGCAGGCTGGGTAGCAGATCGGAAGAGCGGTTTCAG       |
| chr11 | 46393575 | 46393614 | DGKZ_2228  | - | GTGACCTATGCACCAGACGTAGGTGAGAGGCTGTAAGCTCTCCGTCACAGCACCTTAGATCGGAAGAGCGGTTTCAG         |
| chr11 | 46393928 | 46393967 | DGKZ_2229  | - | GTGACCTATGCACCAGACGTTGGGGAGCCAAGAGACAGTCAGGCAGTGGTGGGACGAAGTAGATCGGAAGAGCGGTTTCAG     |
| chr11 | 46394117 | 46394156 | DGKZ_2230  | - | GTGACCTATGCACCAGACGTGGGAAGATGGCAGTGGGGTCAGGGGATGTGTGCTGTACCCAGATCGGAAGAGCGGTTTCAG     |
| chr11 | 46394271 | 46394310 | DGKZ_2231  | - | GTGACCTATGCACCAGACGTAAAGAACAGAGGCAATCAGGCCACAGGGACCCCGGTTTCAGATCGGAAGAGCGGTTTCAG      |
| chr11 | 46394461 | 46394500 | DGKZ_2232  | - | GTGACCTATGCACCAGACGTAGGAGGGACTGAGCCCTCTGTGGTGGAGAGGCCCCAGCAGATCGGAAGAGCGGTTTCAG       |
| chr11 | 46395657 | 46395696 | DGKZ_2233  | - | GTGACCTATGCACCAGACGTGTCAAGGGACCAAAATGAGGCTGGCCCTCACAAATGTCAGATCGGAAGAGCGGTTTCAG       |
| chr11 | 46395899 | 46395938 | DGKZ_2234  | - | GTGACCTATGCACCAGACGTACAAAGCAGTGGGGGCCAGTGAGTACCCACAGCCTGCCACAGATCGGAAGAGCGGTTTCAG     |
| chr11 | 46396104 | 46396143 | DGKZ_2235  | - | GTGACCTATGCACCAGACGTACAGAGGGCGTACCATCTGCTGACAGAGATCTTCTCACAGATCGGAAGAGCGGTTTCAG       |
| chr11 | 46396266 | 46396305 | DGKZ_2236  | - | GTGACCTATGCACCAGACGTGCGGGGAGGGTGTGAGGTGCATGTGCCAGGTGGCCTCCGAGATCGGAAGAGCGGTTTCAG      |
| chr11 | 46396434 | 46396473 | DGKZ_2237  | - | GTGACCTATGCACCAGACGTGGGCGATGACATGGGCTCAAACACAGTCTCTGCAGGACAGATCGGAAGAGCGGTTTCAG       |
| chr11 | 46396932 | 46396971 | DGKZ_2238  | - | GTGACCTATGCACCAGACGTAGGAAGCTGGGTGATGTCAGTGGCAGGCTGGGGGAGGATCGGAAGAGCGGTTTCAG          |
| chr11 | 46397351 | 46397390 | DGKZ_2239  | - | GTGACCTATGCACCAGACGTGGGCCGGAAGCGGGGCTCAGCAAGGGCCCTGCCTTGGTAGATCGGAAGAGCGGTTTCAG       |
| chr11 | 46397566 | 46397605 | DGKZ_2240  | - | GTGACCTATGCACCAGACGTGAGCACCTGTGACGAGCTGGCTGACCCACAGCCCTGCCAGATCGGAAGAGCGGTTTCAG       |
| chr11 | 46397828 | 46397867 | DGKZ_2241  | - | GTGACCTATGCACCAGACGTAAAGCAAAGGCCAGGCTGGGATAGAGTGGGGGCCAGGGAGGATCGGAAGAGCGGTTTCAG      |
| chr11 | 46398024 | 46398063 | DGKZ_2242  | - | GTGACCTATGCACCAGACGTGAGGGCAGCTGAGGATCAGGGAGTGCCATGTCCAGGCCCAAGATCGGAAGAGCGGTTTCAG     |
| chr11 | 46398573 | 46398612 | DGKZ_2243  | - | GTGACCTATGCACCAGACGTAGGTGAGGGCGGGAGGTGAGGGCACCTGACGGTGGGGGCCAGATCGGAAGAGCGGTTTCAG     |
| chr11 | 46399698 | 46399737 | DGKZ_2244  | - | GTGACCTATGCACCAGACGTGCATGATGCTGTGACCGCTACGGCAGGCCAGCTGGAGATCGGAAGAGCGGTTTCAG          |
| chr11 | 46399957 | 46399996 | DGKZ_2245  | - | GTGACCTATGCACCAGACGTACTGCTGTCTGCACTGCGAGTGGAGGCCCTGGGCTTGGGAGATCGGAAGAGCGGTTTCAG      |
| chr11 | 46400491 | 46400530 | DGKZ_2246  | - | GTGACCTATGCACCAGACGTGAGGCATGGCAGGGCTGGACCTCCTGGGGCCACCCCTCCTAGATCGGAAGAGCGGTTTCAG     |
| chr11 | 46400703 | 46400742 | DGKZ_2247  | - | GTGACCTATGCACCAGACGTGGAGGTGGTGGTCAGAGAGCCCTGGCAGCCCTCCTCCTCAGATCGGAAGAGCGGTTTCAG      |
| chr11 | 46400969 | 46401008 | DGKZ_2248  | - | GTGACCTATGCACCAGACGTAGGGGCTGGCTGTGTACCCCATCCGCTCCCTGTATCCACAGATCGGAAGAGCGGTTTCAG      |
| chr11 | 46401331 | 46401370 | DGKZ_2249  | - | GTGACCTATGCACCAGACGTGCGGAGCTGCGATCAGCAGGGCCAGAGGCAGGCTAACCCAGATCGGAAGAGCGGTTTCAG      |
| chr11 | 46388121 | 46388160 | DGKZ_2250  | - | GTGACCTATGCACCAGACGTCTATTCTATGCCCCACAGCCCGGTCAACAGCAGGGGTGCAAGATCGGAAGAGCGGTTTCAG     |
| chr20 | 32264488 | 32264527 | E2F1_2251  | - | GTGACCTATGCACCAGACGTAGGGACAGGGTTTCCAGAGATGCTCACCTTGTCTCTGCAAGATCGGAAGAGCGGTTTCAG      |
| chr20 | 32264861 | 32264900 | E2F1_2252  | - | GTGACCTATGCACCAGACGTGGTAGGTGGTGGTGGGTCAGAGAGCCCTGGCAGCCCTCCTCCTCAGATCGGAAGAGCGGTTTCAG |
| chr20 | 32265957 | 32265996 | E2F1_2253  | - | GTGACCTATGCACCAGACGTATTGGCCGTAGGGTGTGGAAGGCAGGCTTAGCAGGCAGGGAGATCGGAAGAGCGGTTTCAG     |
| chr20 | 32267511 | 32267550 | E2F1_2254  | - | GTGACCTATGCACCAGACGTGCCACACAGGAGGGCAGGCACACCTGCCATGCCAGCCTGAGATCGGAAGAGCGGTTTCAG      |
| chr20 | 32268082 | 32268121 | E2F1_2255  | - | GTGACCTATGCACCAGACGTAGCTTGGGCTGGGCAGACCCCTGTGACCAGGCCAGTTAGATCGGAAGAGCGGTTTCAG        |
| chr20 | 32273760 | 32273799 | E2F1_2256  | - | GTGACCTATGCACCAGACGTGAGGACGCCGCCGACAGCCGCGCTGTGCCCCCGCGAGATCGGAAGAGCGGTTTCAG          |
| chr3  | 89156849 | 89156888 | EPHA3_2257 | - | GTGACCTATGCACCAGACGTACAGAGGGCAGTGAAGAGCAGATATCTCCATGAAGCATGCCAGATCGGAAGAGCGGTTTCAG    |
| chr3  | 89176309 | 89176348 | EPHA3_2258 | - | GTGACCTATGCACCAGACGTACATAATACAAAACACAGTTAATAACAGTGAATTTTTCAGATCGGAAGAGCGGTTTCAG       |
| chr3  | 89258960 | 89258999 | EPHA3_2259 | - | GTGACCTATGCACCAGACGTAAAGAGAAACAGAGAGTGAAGCAGAAATTAATGATAATAACAGATCGGAAGAGCGGTTTCAG    |
| chr3  | 89390016 | 89390055 | EPHA3_2260 | - | GTGACCTATGCACCAGACGTAATGACTCTCTTTAAAAGTCTGTGATAATTTTTTGAAGAGATCGGAAGAGCGGTTTCAG       |
| chr3  | 89390855 | 89390894 | EPHA3_2261 | - | GTGACCTATGCACCAGACGTGTTCAACAAGATTAATGAGTACTTCTGTTTCTCTACTAGATCGGAAGAGCGGTTTCAG        |
| chr3  | 89444937 | 89444976 | EPHA3_2262 | - | GTGACCTATGCACCAGACGTAGGATGGGAGGGAAAGTGAAGCAGAAATTAATGGGTAGATCGGAAGAGCGGTTTCAG         |

|      |           |           |            |   |                                                                                     |
|------|-----------|-----------|------------|---|-------------------------------------------------------------------------------------|
| chr3 | 89448418  | 89448457  | EPHA3_2263 | - | GTGACCTATGCACCAGACGTGAGAAAAAAATTCATGTAAAAATCAAATCTTCATAATGCAGATCGGAAGAGCGGTTTCAG    |
| chr3 | 89456369  | 89456408  | EPHA3_2264 | - | GTGACCTATGCACCAGACGTGAAGAGAAAAAATAAGAACAGGTATTATAATCATGACTAAAGATCGGAAGAGCGGTTTCAG   |
| chr3 | 89457167  | 89457206  | EPHA3_2265 | - | GTGACCTATGCACCAGACGTATCAAGGAAAGCGAACACATAAGAGGAATATATTTAAATAGATCGGAAGAGCGGTTTCAG    |
| chr3 | 89462241  | 89462280  | EPHA3_2266 | - | GTGACCTATGCACCAGACGTAAAGAAAGAAAGGCGCAATTGTAGCTAGATTTGTACAACAGATCGGAAGAGCGGTTTCAG    |
| chr3 | 89468305  | 89468344  | EPHA3_2267 | - | GTGACCTATGCACCAGACGTGCAGAAACAGCAACAAAATGTAAGGAATTCATAATAAAAAAGATCGGAAGAGCGGTTTCAG   |
| chr3 | 89478206  | 89478245  | EPHA3_2268 | - | GTGACCTATGCACCAGACGTAGTAAATAATAATAATCAGTACAGTTCAAGTATTATAGATCGGAAGAGCGGTTTCAG       |
| chr3 | 89480250  | 89480289  | EPHA3_2269 | - | GTGACCTATGCACCAGACGTTTTCAAATGTACAATTAAGATACGTTTCTATTTCCTAAAGATCGGAAGAGCGGTTTCAG     |
| chr3 | 89498325  | 89498364  | EPHA3_2270 | - | GTGACCTATGCACCAGACGTAAAAATCATGTCTACATAATCAGCAATGCATAGAACATATAGATCGGAAGAGCGGTTTCAG   |
| chr3 | 89499277  | 89499316  | EPHA3_2271 | - | GTGACCTATGCACCAGACGTAGCAAAGTTTTTCAGGAACCAGGAAGTTTTTCAGGAAGTGCAGATCGGAAGAGCGGTTTCAG  |
| chr3 | 89521564  | 89521603  | EPHA3_2272 | - | GTGACCTATGCACCAGACGTAAAAACACCAAAGGGAGACAGATCAGGAGTCAGCAGAGTTAGATCGGAAGAGCGGTTTCAG   |
| chr3 | 89528497  | 89528536  | EPHA3_2273 | - | GTGACCTATGCACCAGACGTAGAAAACAAATAAGAATCGGTTTCTCGATAGTGATAAAGATCGGAAGAGCGGTTTCAG      |
| chr3 | 89259290  | 89259329  | EPHA3_2274 | - | GTGACCTATGCACCAGACGTCCAAGATCCATTTGAGTGAACCTTTTCATCAGCTGCAATGGAGATCGGAAGAGCGGTTTCAG  |
| chr7 | 100318554 | 100318593 | EPO_2275   | - | GTGACCTATGCACCAGACGTGGCCGGGTCCTCAGCCAGCTGGGGCGCCCGGTTGACAGATCGGAAGAGCGGTTTCAG       |
| chr7 | 100319131 | 100319170 | EPO_2276   | - | GTGACCTATGCACCAGACGTTAGCCAGGCTGAGAGTCAGGCCGGGGAGGGAGAAGGGTGGCAGATCGGAAGAGCGGTTTCAG  |
| chr7 | 100319535 | 100319574 | EPO_2277   | - | GTGACCTATGCACCAGACGTCACAGCCCGGGGAGTCAAGGGTCCCTGAAGGCTCTGGCCAGATCGGAAGAGCGGTTTCAG    |
| chr7 | 100320237 | 100320276 | EPO_2278   | - | GTGACCTATGCACCAGACGTTGGACTCTGGGAGTCAAGTCAACCTCTCCCTAGATCGGAAGAGCGGTTTCAG            |
| chr7 | 100320551 | 100320590 | EPO_2279   | - | GTGACCTATGCACCAGACGTGAAAACAGGAGGTCGCTGCAGTGCACAGAAAGGAAGGAAAGATCGGAAGAGCGGTTTCAG    |
| chr2 | 212248290 | 212248329 | ERBB4_2280 | - | GTGACCTATGCACCAGACGTGGTTTTTGGTGGAGGACACACTGCTCCAATTTCCCCAGATCGGAAGAGCGGTTTCAG       |
| chr2 | 212251528 | 212251567 | ERBB4_2281 | - | GTGACCTATGCACCAGACGTATTATTTCAGAAACGATCGCCATTGCAAGTTCACCTCCATCAGATCGGAAGAGCGGTTTCAG  |
| chr2 | 212252620 | 212252659 | ERBB4_2282 | - | GTGACCTATGCACCAGACGTCACAATCAACCTTCATCTTTTAGGATTTTCGGTCTTTGCTAGATCGGAAGAGCGGTTTCAG   |
| chr2 | 212285116 | 212285155 | ERBB4_2283 | - | GTGACCTATGCACCAGACGTATTATATACATATCATATTCTTTCTGAGATATAAAATCAGATCGGAAGAGCGGTTTCAG     |
| chr2 | 212286682 | 212286721 | ERBB4_2284 | - | GTGACCTATGCACCAGACGTTTGACTTATGCTTTTAAAGACTAGGCCAATGGCAAACCTCACAGATCGGAAGAGCGGTTTCAG |
| chr2 | 212288830 | 212288869 | ERBB4_2285 | - | GTGACCTATGCACCAGACGTAAAATATGTTTACCATCATCATCTTAGTAAAGTAAATAGATCGGAAGAGCGGTTTCAG      |
| chr2 | 212293083 | 212293122 | ERBB4_2286 | - | GTGACCTATGCACCAGACGTCTTTTTCGCAATTAAGCTGTGAAAGCAAAAATACATATAGATCGGAAGAGCGGTTTCAG     |
| chr2 | 212295620 | 212295659 | ERBB4_2287 | - | GTGACCTATGCACCAGACGTTTTTGGAGCAATCTTGCTTGAATAATAGTATAATATCCAGATCGGAAGAGCGGTTTCAG     |
| chr2 | 212426578 | 212426617 | ERBB4_2288 | - | GTGACCTATGCACCAGACGTGCAATTTCTATGAAATACATTTTTAGGTTAATATTTAGATCGGAAGAGCGGTTTCAG       |
| chr2 | 212483852 | 212483891 | ERBB4_2289 | - | GTGACCTATGCACCAGACGTACACCCAGGCAATCACATTTTTCTCCATTATCAAATAGCCAGATCGGAAGAGCGGTTTCAG   |
| chr2 | 212488597 | 212488636 | ERBB4_2290 | - | GTGACCTATGCACCAGACGTAACAACCGCATATCGTTAGTTAAGTTTTGTTTTAGATGTTTAGATCGGAAGAGCGGTTTCAG  |
| chr2 | 212495137 | 212495176 | ERBB4_2291 | - | GTGACCTATGCACCAGACGTTCTTCTCCTCTCATGTGTTGGGATTTTCATCAGGTTAGATCGGAAGAGCGGTTTCAG       |
| chr2 | 212522429 | 212522468 | ERBB4_2292 | - | GTGACCTATGCACCAGACGTCCATGTTTCCATTTTTCTGCTTCAAATCCTTTCCAGTATAGATCGGAAGAGCGGTTTCAG    |
| chr2 | 212529998 | 212530037 | ERBB4_2293 | - | GTGACCTATGCACCAGACGTTTCTGGCCAAAGGGCTCACCTGGTATGTTTATCCACATGAGATCGGAAGAGCGGTTTCAG    |
| chr2 | 212537839 | 212537878 | ERBB4_2294 | - | GTGACCTATGCACCAGACGTAGACATCTGTGGTGTGTTGGCTTATTAGTATCATGTATGAGATCGGAAGAGCGGTTTCAG    |
| chr2 | 212543727 | 212543766 | ERBB4_2295 | - | GTGACCTATGCACCAGACGTTTCTAGGTTGCTTCCACCTCATGAGCTTTGAAGGACTGAAGATCGGAAGAGCGGTTTCAG    |
| chr2 | 212566642 | 212566681 | ERBB4_2296 | - | GTGACCTATGCACCAGACGTTACTCAGCATTTTAAACATAGAAACTTAAATTTTTCCAGATCGGAAGAGCGGTTTCAG      |
| chr2 | 212568779 | 212568818 | ERBB4_2297 | - | GTGACCTATGCACCAGACGTATGTTTAAAGCTGCAAGGCTCACAGATTTCAAAGAGCAAGATCGGAAGAGCGGTTTCAG     |
| chr2 | 212576725 | 212576764 | ERBB4_2298 | - | GTGACCTATGCACCAGACGTAATTTTTGTGCAAGTATTTTTACAAAGTGTAGACAAAACACTAGATCGGAAGAGCGGTTTCAG |
| chr2 | 212578210 | 212578249 | ERBB4_2299 | - | GTGACCTATGCACCAGACGTGCTCAGATTATTTAGTTAGAAGTGGCCTATATAACAAGGAGATCGGAAGAGCGGTTTCAG    |
| chr2 | 212587068 | 212587107 | ERBB4_2300 | - | GTGACCTATGCACCAGACGTGAATAAGAAATAACAAATTAATAGGTCATTATTTGAAATAGATCGGAAGAGCGGTTTCAG    |
| chr2 | 212589751 | 212589790 | ERBB4_2301 | - | GTGACCTATGCACCAGACGTGATTTCTCTTTTTATTATCCTGCTCTCCTTTCCCTTAGATCGGAAGAGCGGTTTCAG       |
| chr2 | 212615314 | 212615353 | ERBB4_2302 | - | GTGACCTATGCACCAGACGTATCAGTACAGACACACAGTTTGTATGGTCAAGGAATTTAGATCGGAAGAGCGGTTTCAG     |
| chr2 | 212652700 | 212652739 | ERBB4_2303 | - | GTGACCTATGCACCAGACGTTTTATTCTTTTTTAATTTCTCAAATGTTCTACCCATGTGAGATCGGAAGAGCGGTTTCAG    |
| chr2 | 212812105 | 212812144 | ERBB4_2304 | - | GTGACCTATGCACCAGACGTTATCCAAAATGGCAAATATGCTTTTATTATCAATATAAGGAGATCGGAAGAGCGGTTTCAG   |
| chr2 | 212989427 | 212989466 | ERBB4_2305 | - | GTGACCTATGCACCAGACGTGGCTTTCTTTCTTTTGTGAATGGACAGTGGCGTCATAGATCGGAAGAGCGGTTTCAG       |
| chr2 | 213403123 | 213403162 | ERBB4_2306 | - | GTGACCTATGCACCAGACGTTCTGGCACTCCGGTCCGCCAACTGCAGCCGCCGGGGAGATCGGAAGAGCGGTTTCAG       |
| chr6 | 35420273  | 35420312  | FANCE_2307 | - | GTGACCTATGCACCAGACGTGGGTGCCCGCCGCCCTACTCTGGTGTGGGGCTCAGCAGATCGGAAGAGCGGTTTCAG       |
| chr6 | 35423474  | 35423513  | FANCE_2308 | - | GTGACCTATGCACCAGACGTGAGGAGCAGCAAGCAAGCTTAAAGTGTGGCTGAAGGGAGCAAGATCGGAAGAGCGGTTTCAG  |
| chr6 | 35425283  | 35425322  | FANCE_2309 | - | GTGACCTATGCACCAGACGTGAGCCAGTCACTGCTACGTCCTCCCTCCCTGCAGCATGACAGATCGGAAGAGCGGTTTCAG   |
| chr6 | 35425643  | 35425682  | FANCE_2310 | - | GTGACCTATGCACCAGACGTAATCTCATGTTAGGGCTGGCAGAGCCCTCAGTGACAAGTAGATCGGAAGAGCGGTTTCAG    |
| chr6 | 35426024  | 35426063  | FANCE_2311 | - | GTGACCTATGCACCAGACGTAGTGGGGGGGAGAGAGACACCCGGACATGCACTCTGCCAGATCGGAAGAGCGGTTTCAG     |
| chr6 | 35427058  | 35427097  | FANCE_2312 | - | GTGACCTATGCACCAGACGTGAGGGAGAAAAAATAATTTTCTTCTTCAACAGATCGGAAGAGCGGTTTCAG             |
| chr6 | 35427409  | 35427448  | FANCE_2313 | - | GTGACCTATGCACCAGACGTGACAGCAGAAAGGGAAGTCTGGGGGAAATGGCAGAAGACAGATCGGAAGAGCGGTTTCAG    |
| chr6 | 35428279  | 35428318  | FANCE_2314 | - | GTGACCTATGCACCAGACGTGAGGCCCTAGTGAAAAATGCTGGCCCTCCACCCAAAGCTAGATCGGAAGAGCGGTTTCAG    |
| chr6 | 35433971  | 35434010  | FANCE_2315 | - | GTGACCTATGCACCAGACGTGAAAAATCATGTCAAGACTCCAGCAACTGATCCCTCCCGAGATCGGAAGAGCGGTTTCAG    |
| chr6 | 35423777  | 35423816  | FANCE_2316 | - | GTGACCTATGCACCAGACGTGGGATTTCAACCTCCTGCCCCAGGCCAGCCCTACAAGATCGGAAGAGCGGTTTCAG        |
| chr1 | 241663687 | 241663726 | FH_2317    | - | GTGACCTATGCACCAGACGTAAAGAAATAATATCATTTTTGAATGCAAAAATAAAAACAGATCGGAAGAGCGGTTTCAG     |
| chr1 | 241665693 | 241665732 | FH_2318    | - | GTGACCTATGCACCAGACGTAATCTGATTTTTAATGTTTTTGACCAAGGCTTATTATCAGATCGGAAGAGCGGTTTCAG     |
| chr1 | 241669253 | 241669292 | FH_2319    | - | GTGACCTATGCACCAGACGTACGTGAATTTTCTCAITTTCTATTATACGTTGGAGATCGGAAGAGCGGTTTCAG          |
| chr1 | 241671853 | 241671892 | FH_2320    | - | GTGACCTATGCACCAGACGTTTGACTAATTTGATTCAAATTTAGAGCTTGGTACAAATGGCAGATCGGAAGAGCGGTTTCAG  |



|       |           |           |            |   |                                                                                         |
|-------|-----------|-----------|------------|---|-----------------------------------------------------------------------------------------|
| chr1  | 241675217 | 241675256 | FH_2321    | - | GTGACCTATGCACCAGACGTGAGCTTTGCTGTTTTTTGGTTATAAATTGAAAAGCATACCAGATCGGAAGAGCGGTTTCAG       |
| chr1  | 241676853 | 241676892 | FH_2322    | - | GTGACCTATGCACCAGACGTATAAGTGTGTTTTGCTTAATAACCTCAGACCATGCCATACAGATCGGAAGAGCGGTTTCAG       |
| chr1  | 241680432 | 241680471 | FH_2323    | - | GTGACCTATGCACCAGACGTGTTTGTGGAATGTTGGCTATTTTGGATGAAGTAGGCTGTAAGATCGGAAGAGCGGTTTCAG       |
| chr1  | 241682841 | 241682880 | FH_2324    | - | GTGACCTATGCACCAGACGTGCCGCCATCCCCGGCCTCCCCGCAGTGACCTTCAGCCCTAGATCGGAAGAGCGGTTTCAG        |
| chr5  | 180030142 | 180030181 | FLT4_2325  | - | GTGACCTATGCACCAGACGTACAGACCCCCAGCACTTGGGGGTTCAAGCCCCGGCAGGGCAGATCGGAAGAGCGGTTTCAG       |
| chr5  | 180035918 | 180035957 | FLT4_2326  | - | GTGACCTATGCACCAGACGTGCTGAGCCCTGCCTGCAGTGCAGGTATCGATGTTGCCCTCCCAGATCGGAAGAGCGGTTTCAG     |
| chr5  | 180036855 | 180036894 | FLT4_2327  | - | GTGACCTATGCACCAGACGTGAAGGTGGGGCTGCGCTCTCGCTCAGGGCTGGGCGAGATCGGAAGAGCGGTTTCAG            |
| chr5  | 180038281 | 180038320 | FLT4_2328  | - | GTGACCTATGCACCAGACGTCTGCAGGTCCAGGAGTAGGGTGGGAGAAAAGCCATGTGGACAGATCGGAAGAGCGGTTTCAG      |
| chr5  | 180039456 | 180039495 | FLT4_2329  | - | GTGACCTATGCACCAGACGTTCCCAACCTGTTCTACTATGGCCTTTGGCCCTGCCCTGAGATCGGAAGAGCGGTTTCAG         |
| chr5  | 180039961 | 180040000 | FLT4_2330  | - | GTGACCTATGCACCAGACGTCCATGGCCCTGCAGGTTTTGGGGACAGCAAGCGTCGGGGGAGATCGGAAGAGCGGTTTCAG       |
| chr5  | 180041018 | 180041057 | FLT4_2331  | - | GTGACCTATGCACCAGACGTGATGGGGTGCCGGTGGGGAGAGGAGGCGAGGTCACCTGGCGAGATCGGAAGAGCGGTTTCAG      |
| chr5  | 180043317 | 180043356 | FLT4_2332  | - | GTGACCTATGCACCAGACGTGCCATTGAGGAGGGGAACCTGGGGCGGAACAGGTGAAGGAGATCGGAAGAGCGGTTTCAG        |
| chr5  | 180043850 | 180043889 | FLT4_2333  | - | GTGACCTATGCACCAGACGTGCCGGAAGGCCCTCAGACGGGAAAAGGGTGCATCCCCACAGATCGGAAGAGCGGTTTCAG        |
| chr5  | 180045720 | 180045759 | FLT4_2334  | - | GTGACCTATGCACCAGACGTGGCCTCTTCCCTTTTCTAGTGCTGCACGGGCCCGGTTATAGATCGGAAGAGCGGTTTCAG        |
| chr5  | 180046615 | 180046654 | FLT4_2335  | - | GTGACCTATGCACCAGACGTAGCGGGCGGAAGGGCAGCCTAGCTGGTGAGGAGCAGCAGAGATCGGAAGAGCGGTTTCAG        |
| chr5  | 180047123 | 180047162 | FLT4_2336  | - | GTGACCTATGCACCAGACGTACCAGCCTGCCAACCCACACCTCCTGCCCGACCCACTAGATCGGAAGAGCGGTTTCAG          |
| chr5  | 180047559 | 180047598 | FLT4_2337  | - | GTGACCTATGCACCAGACGTCTCCCCGCTCTGATGGAGTCTCTCTCAGGCCTTCCCACAGATCGGAAGAGCGGTTTCAG         |
| chr5  | 180047826 | 180047865 | FLT4_2338  | - | GTGACCTATGCACCAGACGTAGGCTGCACCCTCAACTCCCTCCCGTCCCGAGTTAACGAGATCGGAAGAGCGGTTTCAG         |
| chr5  | 180048056 | 180048095 | FLT4_2339  | - | GTGACCTATGCACCAGACGTGGCCCTGGCGAAGGGCAGCTCCGGAGGCCCGCAGGCGGAGATCGGAAGAGCGGTTTCAG         |
| chr5  | 180048492 | 180048531 | FLT4_2340  | - | GTGACCTATGCACCAGACGTCCGCGGGGAGGGCGGGGACGCGCTCTCTTAGCAGTAGCAGATCGGAAGAGCGGTTTCAG         |
| chr5  | 180049681 | 180049720 | FLT4_2341  | - | GTGACCTATGCACCAGACGTAGACCAGGGCGGGGAGGCCTGGGTACAGGGTCAGGAGGGGAGATCGGAAGAGCGGTTTCAG       |
| chr5  | 180050885 | 180050924 | FLT4_2342  | - | GTGACCTATGCACCAGACGTGCCGCGCTGCTGAGTGCCAGGGAGAAAGGAGAAGGGAGGAAGATCGGAAGAGCGGTTTCAG       |
| chr5  | 180052819 | 180052858 | FLT4_2343  | - | GTGACCTATGCACCAGACGTCTCCAGCCTCAGGTCCTGCACAGCCACAGCCCCAGCCAGATCGGAAGAGCGGTTTCAG          |
| chr5  | 180053061 | 180053100 | FLT4_2344  | - | GTGACCTATGCACCAGACGTGACGGGAGAGCGCAGGGTGGCGCGCTGGCATTTGAGGGCAGATCGGAAGAGCGGTTTCAG        |
| chr5  | 180055832 | 180055871 | FLT4_2345  | - | GTGACCTATGCACCAGACGTGGCTCCCCACCGACCCCGCGGATACCCCTTCCAAGTCCAGAGATCGGAAGAGCGGTTTCAG       |
| chr5  | 180056209 | 180056248 | FLT4_2346  | - | GTGACCTATGCACCAGACGTGAAACCAGGGTCTTGTGCCCTGTGGGCTGGGCCAGAAAGATCGGAAGAGCGGTTTCAG          |
| chr5  | 180056646 | 180056685 | FLT4_2347  | - | GTGACCTATGCACCAGACGTGACGCTGCCAGGCTGTCTGTCCCCAGGAGTCCCTGTGAAGATCGGAAGAGCGGTTTCAG         |
| chr5  | 180056893 | 180056932 | FLT4_2348  | - | GTGACCTATGCACCAGACGTTGTGCCCGTTCCCAGTAAACGGGGGCTGTCACCTGCCTACTAGATCGGAAGAGCGGTTTCAG      |
| chr5  | 180057175 | 180057214 | FLT4_2349  | - | GTGACCTATGCACCAGACGTACCCCAACCCAGCCTCCAGCCTCCCATCCACCCCTGGAGATCGGAAGAGCGGTTTCAG          |
| chr5  | 180057505 | 180057544 | FLT4_2350  | - | GTGACCTATGCACCAGACGTGAGCGGGCCAGCCTGGAGCAGGGTCCCGGGCAGCTGGGGAGATCGGAAGAGCGGTTTCAG        |
| chr5  | 180058632 | 180058671 | FLT4_2351  | - | GTGACCTATGCACCAGACGTCTCTCCACTGGCAGGCCAGAGAGGCTGCACAAGCCCAAGATCGGAAGAGCGGTTTCAG          |
| chr5  | 180076438 | 180076477 | FLT4_2352  | - | GTGACCTATGCACCAGACGTGCAACGGGCCACCCGCCGAGCGTGGGGCTGGCCGGGGAGAGATCGGAAGAGCGGTTTCAG        |
| chr2  | 227659676 | 227659715 | IRS1_2353  | - | GTGACCTATGCACCAGACGTATCACAGCAGGTGCGTTTTATGTTGACAAAGTCAAGAAAGATCGGAAGAGCGGTTTCAG         |
| chr2  | 227660142 | 227660181 | IRS1_2354  | - | GTGACCTATGCACCAGACGTCCACAAGGGTGGCCGGGAGGCATAGCTCCGAGACTTTCTAGATCGGAAGAGCGGTTTCAG        |
| chr2  | 227660608 | 227660647 | IRS1_2355  | - | GTGACCTATGCACCAGACGTGGCACTGGAGCAGTACATGAAGATGGACCTGGGGCCGGCAGATCGGAAGAGCGGTTTCAG        |
| chr2  | 227661074 | 227661113 | IRS1_2356  | - | GTGACCTATGCACCAGACGTAGGAGGGTGCCCGGCATCAGCACCTCCGCCCTTCCACTAGAGATCGGAAGAGCGGTTTCAG       |
| chr2  | 227661540 | 227661579 | IRS1_2357  | - | GTGACCTATGCACCAGACGTGAAAGGGCAGTGAGACTATATGCCCATGAGCCCCAAGAAGATCGGAAGAGCGGTTTCAG         |
| chr2  | 227662006 | 227662045 | IRS1_2358  | - | GTGACCTATGCACCAGACGTCAAGGGGCCCTCCACCCTGACCGCCCCAACGGTCACTACAGATCGGAAGAGCGGTTTCAG        |
| chr2  | 227662472 | 227662511 | IRS1_2359  | - | GTGACCTATGCACCAGACGTGCATGGTGGGCGGGAAGCCAGGCTCCTTCCGTGTCCGCGCAGATCGGAAGAGCGGTTTCAG       |
| chr2  | 227662938 | 227662977 | IRS1_2360  | - | GTGACCTATGCACCAGACGTTTCAAAGGGTCTGGCAAGTGATCCTGAAGCCAAAGGGCCAGATCGGAAGAGCGGTTTCAG        |
| chr22 | 22123443  | 22123482  | MAPK1_2361 | - | GTGACCTATGCACCAGACGTGACTGGAGTTTTAATACAGTGAGCTTAGCAAGGGAGGCGAGATCGGAAGAGCGGTTTCAG        |
| chr22 | 22127112  | 22127151  | MAPK1_2362 | - | GTGACCTATGCACCAGACGTATGTTCTGGCTGCTGCTTACGGACATAGATCAGCCAGCAGATCGGAAGAGCGGTTTCAG         |
| chr22 | 22142496  | 22142535  | MAPK1_2363 | - | GTGACCTATGCACCAGACGTTTTCTGTTGATTAGTTTTTCTTAGGCTTAGCTTCGCGTTAGATCGGAAGAGCGGTTTCAG        |
| chr22 | 22142933  | 22142972  | MAPK1_2364 | - | GTGACCTATGCACCAGACGTGAGCCCTCAGGAGCTAGATTTACTCAAGTTTTGTACAGCAGATCGGAAGAGCGGTTTCAG        |
| chr22 | 22153251  | 22153290  | MAPK1_2365 | - | GTGACCTATGCACCAGACGTAGTTTTGCATAAAAAGAAATCCAGTAAGTAAAGAACTTTTCAGATCGGAAGAGCGGTTTCAG      |
| chr22 | 22160089  | 22160128  | MAPK1_2366 | - | GTGACCTATGCACCAGACGTTTTACTATTAAAGGTATATATATGAAACCCCTTTCAGATCGGAAGAGCGGTTTCAG            |
| chr22 | 22161903  | 22161942  | MAPK1_2367 | - | GTGACCTATGCACCAGACGTTAGGCAACTGGCCAATTCACCTGCTTGGTAACCTTGTGAAGATCGGAAGAGCGGTTTCAG        |
| chr8  | 90947760  | 90947799  | NBN_2368   | - | GTGACCTATGCACCAGACGTAAAAAGAGCCATGAAAAAATCTCCTAGTAAGCATCTACAGATCGGAAGAGCGGTTTCAG         |
| chr8  | 90949204  | 90949243  | NBN_2369   | - | GTGACCTATGCACCAGACGTATTACCTTTCTCATGTACCTTTGAGAGATGTATATAAAAAGATCGGAAGAGCGGTTTCAG        |
| chr8  | 90955431  | 90955470  | NBN_2370   | - | GTGACCTATGCACCAGACGTAGTGAGGCCAGAAAGTTGCTTAAATTTGCACCTTTGGTCCAAGATCGGAAGAGCGGTTTCAG      |
| chr8  | 90958318  | 90958357  | NBN_2371   | - | GTGACCTATGCACCAGACGTCAACTGTATCACAGAGGTCAGTGTGTTGAAATGTTTTAGAGATCGGAAGAGCGGTTTCAG        |
| chr8  | 90960002  | 90960041  | NBN_2372   | - | GTGACCTATGCACCAGACGTTTTATTAATTTTTATACAGATTGCTTACGAGTTTGGCTTACGGGACTGATCGGAAGAGCGGTTTCAG |
| chr8  | 90965422  | 90965461  | NBN_2373   | - | GTGACCTATGCACCAGACGTTTTTAAATGAGAGGTATAGTACATAGAAGCTTGAATGCTAGATCGGAAGAGCGGTTTCAG        |
| chr8  | 90967461  | 90967500  | NBN_2374   | - | GTGACCTATGCACCAGACGTGATAACTTCTCTCATGTCTCTGAAAAAAAATGAAAGTTTAGATCGGAAGAGCGGTTTCAG        |
| chr8  | 90970903  | 90970942  | NBN_2375   | - | GTGACCTATGCACCAGACGTTTCATTACCGTACTATTGTTATTCTATCAATAAATTAAGATCGGAAGAGCGGTTTCAG          |
| chr8  | 90976588  | 90976627  | NBN_2376   | - | GTGACCTATGCACCAGACGTCAATTTTTATTGATTGTTAGCAACTTTATTATGTAATAGATCGGAAGAGCGGTTTCAG          |
| chr8  | 90982542  | 90982581  | NBN_2377   | - | GTGACCTATGCACCAGACGTTATCTTTTACTTAAAGTAAAAAGTCAAGTAGGAGATTTTATGAGATCGGAAGAGCGGTTTCAG     |
| chr8  | 90983351  | 90983390  | NBN_2378   | - | GTGACCTATGCACCAGACGTATAAGCTAAATTTTTCTAAAGAATACATTACAAACTAGGAGATCGGAAGAGCGGTTTCAG        |

|       |          |          |              |   |                                                                                    |
|-------|----------|----------|--------------|---|------------------------------------------------------------------------------------|
| chr8  | 90990398 | 90990437 | NBN_2379     | - | GTGACCTATGCACCAGACGTTATTTTAAATATAACAAGATGTCACCTTATATGATAGCATTAGATCGGAAGAGCGGTTACG  |
| chr8  | 90992912 | 90992951 | NBN_2380     | - | GTGACCTATGCACCAGACGTTGCTTGTCTTATGTTAAAAATAAGTTATTTGAATTTAAAGATCGGAAGAGCGGTTACG     |
| chr8  | 90993553 | 90993592 | NBN_2381     | - | GTGACCTATGCACCAGACGTTTAAAATTGATTTTAAAATGGACAGCTTTGTTTCAGCCAAAGATCGGAAGAGCGGTTACG   |
| chr8  | 90994900 | 90994939 | NBN_2382     | - | GTGACCTATGCACCAGACGTAATTTTATTTTCACTAGTTTCCAGTAAGGGGGTTGAAATCAAGATCGGAAGAGCGGTTACG  |
| chr8  | 90996703 | 90996742 | NBN_2383     | - | GTGACCTATGCACCAGACGTAAGGGAAGCCCTCGGGGCCATTTTTCCCGGTAGCGACTGCCAGATCGGAAGAGCGGTTACG  |
| chr20 | 8113249  | 8113288  | PLCB1_2384   | - | GTGACCTATGCACCAGACGTTCCGGCTCCGGGCCCGCCGGCGAGCGCGGACTGGAGATCGGAAGAGCGGTTACG         |
| chr20 | 8130891  | 8130930  | PLCB1_2385   | - | GTGACCTATGCACCAGACGTTAAGAAAGAAACATGAATATCAACATATACACTGTAGAAAAAAGATCGGAAGAGCGGTTACG |
| chr20 | 8351979  | 8352018  | PLCB1_2386   | - | GTGACCTATGCACCAGACGTTAAAACGTGAAATCGTTAAGCAACGACACAGACCTTTCTCAGATCGGAAGAGCGGTTACG   |
| chr20 | 8608891  | 8608930  | PLCB1_2387   | - | GTGACCTATGCACCAGACGTAATATTGAAAATAATTAGTCTATAACTAGAGATCCAACGAGATCGGAAGAGCGGTTACG    |
| chr20 | 8626699  | 8626738  | PLCB1_2388   | - | GTGACCTATGCACCAGACGTTAAATAACACTTGCATTAGCTTAAATACTGCACAGTATTAGATCGGAAGAGCGGTTACG    |
| chr20 | 8629971  | 8630010  | PLCB1_2389   | - | GTGACCTATGCACCAGACGTAACAACAACAAGGAGAGAGGTTTAAATGGCACATGGATCAAGATCGGAAGAGCGGTTACG   |
| chr20 | 8639135  | 8639174  | PLCB1_2390   | - | GTGACCTATGCACCAGACGTTGAAAACCAAGCAATAAGAATTTTTAAACTAAGTTTTCAAGATCGGAAGAGCGGTTACG    |
| chr20 | 8665529  | 8665568  | PLCB1_2391   | - | GTGACCTATGCACCAGACGTTGAAGTTAGAAAGGATGTAATGCATTTCTTTATGGGTGTAGATCGGAAGAGCGGTTACG    |
| chr20 | 8678223  | 8678262  | PLCB1_2392   | - | GTGACCTATGCACCAGACGTTCAAACAACAAACCCAGATTCCCATGAAGCAAGGATGAAGATCGGAAGAGCGGTTACG     |
| chr20 | 8689267  | 8689306  | PLCB1_2393   | - | GTGACCTATGCACCAGACGTTGAACACATGTATATTCAGTATGCCAGAATTTTCATCTGTAGATCGGAAGAGCGGTTACG   |
| chr20 | 8696861  | 8696900  | PLCB1_2394   | - | GTGACCTATGCACCAGACGTACAGAACAAGAAAGGAAAGTAGGGAGGCTTATCCAAAGAGATCGGAAGAGCGGTTACG     |
| chr20 | 8698268  | 8698307  | PLCB1_2395   | - | GTGACCTATGCACCAGACGTTGAAAGGCATATTTTAAAAAATACTGCTCCCTCTTTTCCAGAGATCGGAAGAGCGGTTACG  |
| chr20 | 8702951  | 8702990  | PLCB1_2396   | - | GTGACCTATGCACCAGACGTTAATAACAGATCATCTTCAACATTTTCAACATTTAGCTAGATCGGAAGAGCGGTTACG     |
| chr20 | 8705253  | 8705292  | PLCB1_2397   | - | GTGACCTATGCACCAGACGTTGAATAAAAAAGAAAAACATTTCCAGAGTCAGCATTATATTAAGATCGGAAGAGCGGTTACG |
| chr20 | 8707906  | 8707945  | PLCB1_2398   | - | GTGACCTATGCACCAGACGTTACAACAACAAAAAGGGGAAGGTGAGAATACAATTAGATCGGAAGAGCGGTTACG        |
| chr20 | 8709647  | 8709686  | PLCB1_2399   | - | GTGACCTATGCACCAGACGTATGTTAAGTAGTGAATACAATTATAAAAAATTTAGTCAAAGATCGGAAGAGCGGTTACG    |
| chr20 | 8713835  | 8713874  | PLCB1_2400   | - | GTGACCTATGCACCAGACGTTAAAACACAAGCCTTATTGTGAGTTTATCTATACTTTGGGGTAGATCGGAAGAGCGGTTACG |
| chr20 | 8717625  | 8717664  | PLCB1_2401   | - | GTGACCTATGCACCAGACGTTAATAAATCAATCCATAAGGAATTTTGATATGCAAAATAGATCGGAAGAGCGGTTACG     |
| chr20 | 8719858  | 8719897  | PLCB1_2402   | - | GTGACCTATGCACCAGACGTTAATAAGTACACACTGGTTAAGAATGAACAATTTCAAAGATCGGAAGAGCGGTTACG      |
| chr20 | 8720941  | 8720980  | PLCB1_2403   | - | GTGACCTATGCACCAGACGTAGAATAATGCTGTGTAGCACATATTTCTTTCCAATGTTAAGATCGGAAGAGCGGTTACG    |
| chr20 | 8737643  | 8737682  | PLCB1_2404   | - | GTGACCTATGCACCAGACGTTAAATATCCTTTTCTTTCCACATTTCTTTTATTCTTTTCCAGATCGGAAGAGCGGTTACG   |
| chr20 | 8741004  | 8741043  | PLCB1_2405   | - | GTGACCTATGCACCAGACGTTAAAGATAAAAAATAAGCCTCTTCAACTTTTTTAAATTTTAAAGATCGGAAGAGCGGTTACG |
| chr20 | 8745736  | 8745775  | PLCB1_2406   | - | GTGACCTATGCACCAGACGTTGAATATGAAAGCTAAGGGAATGGGAGGGCTGAACATCCAAGATCGGAAGAGCGGTTACG   |
| chr20 | 8755136  | 8755175  | PLCB1_2407   | - | GTGACCTATGCACCAGACGTACAGAGTTGACTCACAAAAACAGACAGCCATAACAAGGTAGATCGGAAGAGCGGTTACG    |
| chr20 | 8769046  | 8769085  | PLCB1_2408   | - | GTGACCTATGCACCAGACGTTAAAGTGTCTTGTGCTATTTCAAATGATTGCAAAACAGACAGATCGGAAGAGCGGTTACG   |
| chr20 | 8769230  | 8769269  | PLCB1_2409   | - | GTGACCTATGCACCAGACGTTAATGGAAGTAAAAGAGAAAAAGAGGCAATCAGATGGGAAGATCGGAAGAGCGGTTACG    |
| chr20 | 8770115  | 8770154  | PLCB1_2410   | - | GTGACCTATGCACCAGACGTATGATGAATACATCATTATACCAATTCATCCAGAATTGACAGATCGGAAGAGCGGTTACG   |
| chr20 | 8770772  | 8770811  | PLCB1_2411   | - | GTGACCTATGCACCAGACGTGTTACAAGAAACATACTTTTCTTCACTAAACATTTAAAGTGAAGATCGGAAGAGCGGTTACG |
| chr20 | 8782653  | 8782692  | PLCB1_2412   | - | GTGACCTATGCACCAGACGTTAAAAGGGAGGCTGTCAATTTTTGTGGCAATGAAATTTGATAGATCGGAAGAGCGGTTACG  |
| chr20 | 8862219  | 8862258  | PLCB1_2413   | - | GTGACCTATGCACCAGACGTTAAGAGGGGAGATGACTTGAAGTTGTTTATGTTTCTATAAGATCGGAAGAGCGGTTACG    |
| chr1  | 1982020  | 1982059  | PRKCZ_2414   | - | GTGACCTATGCACCAGACGTCCCCGCCCGCTCAGCGCTGCGCCCCGGGAGCTCCGGCCAAGATCGGAAGAGCGGTTACG    |
| chr1  | 1986830  | 1986869  | PRKCZ_2415   | - | GTGACCTATGCACCAGACGTGGGGACATGGGCATCTGTTACCGTGGGGCATATTTGAATCAGATCGGAAGAGCGGTTACG   |
| chr1  | 1987873  | 1987912  | PRKCZ_2416   | - | GTGACCTATGCACCAGACGTCAAGAGACGGTGCTGACGTCCGCCAAGGGCCGAGGCAAAGATCGGAAGAGCGGTTACG     |
| chr1  | 1990930  | 1990969  | PRKCZ_2417   | - | GTGACCTATGCACCAGACGTGAGAGAAAGAGACAGCGTCAAGACCCTGCGGCTGCCACTCAGATCGGAAGAGCGGTTACG   |
| chr1  | 2066651  | 2066690  | PRKCZ_2418   | - | GTGACCTATGCACCAGACGTTATGAGAAGGTGTAAGAAACAGCCTGGCAGCCACGAGCAGATCGGAAGAGCGGTTACG     |
| chr1  | 2075599  | 2075638  | PRKCZ_2419   | - | GTGACCTATGCACCAGACGTGAAATGACAGGCTGAAAGCCACAGCCACACTGAGGGGCCAGCAGATCGGAAGAGCGGTTACG |
| chr1  | 2075728  | 2075767  | PRKCZ_2420   | - | GTGACCTATGCACCAGACGTCAAGTCAAGGACGAGGCGGTCAGCGCTTATGGACCAAGATCGGAAGAGCGGTTACG       |
| chr1  | 2077416  | 2077455  | PRKCZ_2421   | - | GTGACCTATGCACCAGACGTGACACAGAGATGGCAGCATGACCAAGTGCTAGAGCAGGTGAGATCGGAAGAGCGGTTACG   |
| chr1  | 2080261  | 2080300  | PRKCZ_2422   | - | GTGACCTATGCACCAGACGTAGGGAGGAAGGAAGGGGGCTTACGGTGTGGTCAGGAACGCAGATCGGAAGAGCGGTTACG   |
| chr1  | 2082179  | 2082218  | PRKCZ_2423   | - | GTGACCTATGCACCAGACGTAGAACAAGACCCGAAAGTGAAGAGGGGGTTCCCGGGAGAGATCGGAAGAGCGGTTACG     |
| chr1  | 2087384  | 2087423  | PRKCZ_2424   | - | GTGACCTATGCACCAGACGTCAACAGGGAGTGTAATGAGGCTCCCGCAATGCTCCTCACAAAGATCGGAAGAGCGGTTACG  |
| chr1  | 2100907  | 2100946  | PRKCZ_2425   | - | GTGACCTATGCACCAGACGTAGAGGCGCCGGAGGCTGCAGTCACTCGGCAGACGCGGCAGATCGGAAGAGCGGTTACG     |
| chr1  | 2103444  | 2103483  | PRKCZ_2426   | - | GTGACCTATGCACCAGACGTGGATGCCGTATGGGGCAGTGCCTGTGCCAGAGGCTGCGAGATCGGAAGAGCGGTTACG     |
| chr1  | 2103690  | 2103729  | PRKCZ_2427   | - | GTGACCTATGCACCAGACGTAAAGTTACTGGGAGAGGGTTCTTGTAGACACTACCCCGCAGATCGGAAGAGCGGTTACG    |
| chr1  | 2105286  | 2105325  | PRKCZ_2428   | - | GTGACCTATGCACCAGACGTGCACACAGCATCACCGAGTGGGGCCACATGGGCCGCGAGATCGGAAGAGCGGTTACG      |
| chr1  | 2106143  | 2106182  | PRKCZ_2429   | - | GTGACCTATGCACCAGACGTGGAGCCTGGTGAAGACTTGCCTGTGTTGTGCCATTTGCAGATCGGAAGAGCGGTTACG     |
| chr1  | 2106613  | 2106652  | PRKCZ_2430   | - | GTGACCTATGCACCAGACGTGAGTTCAAACAAGGACCAAGTCAAGCCCATCCCGGAAGCCAGATCGGAAGAGCGGTTACG   |
| chr1  | 2115972  | 2116011  | PRKCZ_2431   | - | GTGACCTATGCACCAGACGTCAATAGGAGAAGGGTCAGCTCCGCGCGGGCATCATCCCTAAGATCGGAAGAGCGGTTACG   |
| chr1  | 2116311  | 2116350  | PRKCZ_2432   | - | GTGACCTATGCACCAGACGTAGGTGGCAGGGGGGAGGGGGGTGACCGTGTGTTTCTCCAGATCGGAAGAGCGGTTACG     |
| chr22 | 24129307 | 24129346 | SMARCB1_2433 | - | GTGACCTATGCACCAGACGTGAGGGCGGGCGGCCGAGCCGGGCTGCGAGGGATCAGGAGGATCGGAAGAGCGGTTACG     |
| chr22 | 24133893 | 24133932 | SMARCB1_2434 | - | GTGACCTATGCACCAGACGTAGCAAGAAGGCTCATTATAAGGGTCCGAGCACCACAGGGAAGATCGGAAGAGCGGTTACG   |
| chr22 | 24135696 | 24135735 | SMARCB1_2435 | - | GTGACCTATGCACCAGACGTCAACACTAGGCTCACTGCTGTTGGCGGTGGCACAGATCGGAAGAGCGGTTACG          |
| chr22 | 24143081 | 24143120 | SMARCB1_2436 | - | GTGACCTATGCACCAGACGTACAAGAAAGTCTCCAGTCACTAGTATAGGACCTGATCGGAAGAGCGGTTACG           |

|       |           |           |              |   |                                                                                         |
|-------|-----------|-----------|--------------|---|-----------------------------------------------------------------------------------------|
| chr22 | 24145432  | 24145471  | SMARCB1_2437 | - | GTGACCTATGCACCAGACGTAATGGAAGCAACAGTCAAGCGAGGGGGCCGAGCCCTAGGTAGATCGGAAGAGCGGTTTCAG       |
| chr22 | 24158907  | 24158946  | SMARCB1_2438 | - | GTGACCTATGCACCAGACGTTGAGAGGGAAGGGATGCCAAGAGATTGCACCATGCTTTGGGCAGATCGGAAGAGCGGTTTCAG     |
| chr22 | 24167362  | 24167401  | SMARCB1_2439 | - | GTGACCTATGCACCAGACGTAACCAAAGGACACAAGTTAGAGCTTTTGCAGCCCAGGGAGAGATCGGAAGAGCGGTTTCAG       |
| chr22 | 24175709  | 24175748  | SMARCB1_2440 | - | GTGACCTATGCACCAGACGTTGGGAGGCGAGTGAAGAGGAATGACTTTTCCAGCTATAGATGGAGATCGGAAGAGCGGTTTCAG    |
| chr22 | 24176278  | 24176317  | SMARCB1_2441 | - | GTGACCTATGCACCAGACGTTAGTGGGGAGGGCAATGAGTCGGGGCCAGCTCCCAGCCCTGGAGATCGGAAGAGCGGTTTCAG     |
| chr15 | 57212062  | 57212101  | TCF12_2442   | - | GTGACCTATGCACCAGACGTTTCTAGCAGGTCCTAGGGCAGAGGAAACGGGCTCAGCGAGAGATCGGAAGAGCGGTTTCAG       |
| chr15 | 57213174  | 57213213  | TCF12_2443   | - | GTGACCTATGCACCAGACGTTACCCAAATATATCTGTAGTCTGAAATTTCTTAGATTACAGATCGGAAGAGCGGTTTCAG        |
| chr15 | 57355898  | 57355937  | TCF12_2444   | - | GTGACCTATGCACCAGACGTTAAGAAAATAAAGATATATCTAAAAACATACTTTTGTGGAAGATCGGAAGAGCGGTTTCAG       |
| chr15 | 57383937  | 57383976  | TCF12_2445   | - | GTGACCTATGCACCAGACGTTAAAAAGATCAGAGTATTAAGAGATTATTTGGCAGTCCCAGATCGGAAGAGCGGTTTCAG        |
| chr15 | 57458550  | 57458589  | TCF12_2446   | - | GTGACCTATGCACCAGACGTTAAGAAAATAAAGTATATAAAAACCCCTTCATTATTGACAGAGATCGGAAGAGCGGTTTCAG      |
| chr15 | 57484306  | 57484345  | TCF12_2447   | - | GTGACCTATGCACCAGACGTTAGGCCAAGGAAACAAGTTATTTTCTGCTGATACTGACCCAGATCGGAAGAGCGGTTTCAG       |
| chr15 | 57489921  | 57489960  | TCF12_2448   | - | GTGACCTATGCACCAGACGTTAAAAACAATACATTTCTTCCAGCATAATATACCAGAAAAAAGATCGGAAGAGCGGTTTCAG      |
| chr15 | 57511670  | 57511709  | TCF12_2449   | - | GTGACCTATGCACCAGACGTTAAATGTTACTATTTTGTAGCTATGCACACAGCCCTCTCTCAGATCGGAAGAGCGGTTTCAG      |
| chr15 | 57523300  | 57523339  | TCF12_2450   | - | GTGACCTATGCACCAGACGTTAACAGCACAATTTAATTAATAATGTAAGTACTATCATATTAAGATCGGAAGAGCGGTTTCAG     |
| chr15 | 57524439  | 57524478  | TCF12_2451   | - | GTGACCTATGCACCAGACGTTAAGAAAATAAATAATTTTCTTGTAGCTAAAAATTTCTTGTAGATCGGAAGAGCGGTTTCAG      |
| chr15 | 57524860  | 57524899  | TCF12_2452   | - | GTGACCTATGCACCAGACGTTAGAGATATGATCTATTAATATATTTTTCTGAATAATATTCAGATCGGAAGAGCGGTTTCAG      |
| chr15 | 57526191  | 57526230  | TCF12_2453   | - | GTGACCTATGCACCAGACGTTACAGAGAAAATAAATCAAGAATTTTACAAGCAAGTATTATAGATCGGAAGAGCGGTTTCAG      |
| chr15 | 57535620  | 57535659  | TCF12_2454   | - | GTGACCTATGCACCAGACGTTAACAAGAAATAACATGATCAACATGTGACAACAGCACAAAGATCGGAAGAGCGGTTTCAG       |
| chr15 | 57543498  | 57543537  | TCF12_2455   | - | GTGACCTATGCACCAGACGTTCAAAGTAGCCACACACCTGGGTTAACTCAGTGATCTTGTAGATCGGAAGAGCGGTTTCAG       |
| chr15 | 57544569  | 57544608  | TCF12_2456   | - | GTGACCTATGCACCAGACGTTCAAGACAGAACAGGAGGCCAAGCACAGGTTAAGATTAAC TAGATCGGAAGAGCGGTTTCAG     |
| chr15 | 57545410  | 57545449  | TCF12_2457   | - | GTGACCTATGCACCAGACGTTAAAAAAAACATGGTGGTTATTGCTGGCATCTGTTAGAAGATCGGAAGAGCGGTTTCAG         |
| chr15 | 57554242  | 57554281  | TCF12_2458   | - | GTGACCTATGCACCAGACGTTGGAAAACCCAAAAATAAAAAAGATTAAGATAGTTTCAGAGAGATCGGAAGAGCGGTTTCAG      |
| chr15 | 57555260  | 57555299  | TCF12_2459   | - | GTGACCTATGCACCAGACGTTGGCAAAGGAAAATAAAAAAGACGACTCATATAGATCGGAAGAGCGGTTTCAG               |
| chr15 | 57565178  | 57565217  | TCF12_2460   | - | GTGACCTATGCACCAGACGTTAAGTAGCCAAAGGTCATTAGGTTTCTATAAAGTAAGAAGATCGGAAGAGCGGTTTCAG         |
| chr15 | 57574593  | 57574632  | TCF12_2461   | - | GTGACCTATGCACCAGACGTTGGGAAAAGATTTTATCACTATGGTTTTAAGTTATGAATTAGATCGGAAGAGCGGTTTCAG       |
| chr1  | 186283053 | 186283092 | TPR_2462     | - | GTGACCTATGCACCAGACGTTACAATAAACAACCTGTGAATAAGATTATCAAATCTGTTTTAAGATCGGAAGAGCGGTTTCAG     |
| chr1  | 186283711 | 186283750 | TPR_2463     | - | GTGACCTATGCACCAGACGTTGACATAACTGGATTACATGATAGAATGTGGAATAGTAATAAGATCGGAAGAGCGGTTTCAG      |
| chr1  | 186286564 | 186286603 | TPR_2464     | - | GTGACCTATGCACCAGACGTTGCCCTTGACTGCAATACAGTTTTTATACATCAAACCTGTTAGATCGGAAGAGCGGTTTCAG      |
| chr1  | 186287529 | 186287568 | TPR_2465     | - | GTGACCTATGCACCAGACGTTATTTGTTGTTTGGCTTGTAGCTCAACAGACTGTAGATCGGAAGAGCGGTTTCAG             |
| chr1  | 186287815 | 186287854 | TPR_2466     | - | GTGACCTATGCACCAGACGTTAAGCGCAGATAGTAGGTTCTGTTTTATTGGTAAAAATGAAAAGATCGGAAGAGCGGTTTCAG     |
| chr1  | 186289394 | 186289433 | TPR_2467     | - | GTGACCTATGCACCAGACGTTAAACCTTTAGATCCCCTGAATTTGTATGATTTTGGTAATAAGATCGGAAGAGCGGTTTCAG      |
| chr1  | 186291400 | 186291439 | TPR_2468     | - | GTGACCTATGCACCAGACGTTGAAAGAGAAACATACTTTATAACTAATCAAACCTTTTAGTACAGATCGGAAGAGCGGTTTCAG    |
| chr1  | 186291600 | 186291639 | TPR_2469     | - | GTGACCTATGCACCAGACGTTACCCATTATGTAAGAGTAATTCATTTCTTGAGCAGATATTAGATCGGAAGAGCGGTTTCAG      |
| chr1  | 186292768 | 186292807 | TPR_2470     | - | GTGACCTATGCACCAGACGTTACTGGTCAATTAAGAAATGAACTTTGAAAAAAATCTTGGAGATCGGAAGAGCGGTTTCAG       |
| chr1  | 186294846 | 186294885 | TPR_2471     | - | GTGACCTATGCACCAGACGTTAATAGCCTTTTTTGTAGCCTTTTGAATTAATCTGAGTATTCTTAAAGATCGGAAGAGCGGTTTCAG |
| chr1  | 186295186 | 186295225 | TPR_2472     | - | GTGACCTATGCACCAGACGTTAGAATTTTAAACCATTATAGTTCTTTCTATGAGCTTTCTTAGATCGGAAGAGCGGTTTCAG      |
| chr1  | 186296542 | 186296581 | TPR_2473     | - | GTGACCTATGCACCAGACGTTTTGAAATCATCTAGTGTTTTTAACTATTGGATGAAAGTAGATCGGAAGAGCGGTTTCAG        |
| chr1  | 186300580 | 186300619 | TPR_2474     | - | GTGACCTATGCACCAGACGTTACATACCTAAAGTACCACACCGTTGCTTTTTCTGTAATGAAAGATCGGAAGAGCGGTTTCAG     |
| chr1  | 186301277 | 186301316 | TPR_2475     | - | GTGACCTATGCACCAGACGTTTCTTTCTGTGATTTTAACTTTTACCAGTAGAGTTAAGGAGATCGGAAGAGCGGTTTCAG        |
| chr1  | 186302204 | 186302243 | TPR_2476     | - | GTGACCTATGCACCAGACGTTTTTAAAAAGAGTCAGAGTAGACCTATGCATTATAAAGAGATCGGAAGAGCGGTTTCAG         |
| chr1  | 186303407 | 186303446 | TPR_2477     | - | GTGACCTATGCACCAGACGTTAATACAGATCTGATGAGACTGCTTATTAGATTATATAGATCGGAAGAGCGGTTTCAG          |
| chr1  | 186304150 | 186304189 | TPR_2478     | - | GTGACCTATGCACCAGACGTTGTTATTTTATAGTCTGTTATTTTTCTTTTAAAGCTCAGGGAGATCGGAAGAGCGGTTTCAG      |
| chr1  | 186304420 | 186304459 | TPR_2479     | - | GTGACCTATGCACCAGACGTAATTCTGCTTAAAGTAACAAATGTTTTTCTTTGTACATTAGATCGGAAGAGCGGTTTCAG        |
| chr1  | 186305578 | 186305617 | TPR_2480     | - | GTGACCTATGCACCAGACGTTGTTTAAAGTTTGAACCTTGGTAGTGAAGGTTGATTATGTGATAGATCGGAAGAGCGGTTTCAG    |
| chr1  | 186306095 | 186306134 | TPR_2481     | - | GTGACCTATGCACCAGACGTTGAGAACAGTCTGTTCTTAATCTTTCTGTTTATACACCTAAGATCGGAAGAGCGGTTTCAG       |
| chr1  | 186307115 | 186307154 | TPR_2482     | - | GTGACCTATGCACCAGACGTTGAAACTTCTTACAAAAAAAAAC TAGGATGAATGTTATAGATCGGAAGAGCGGTTTCAG        |
| chr1  | 186308724 | 186308763 | TPR_2483     | - | GTGACCTATGCACCAGACGTTAGAAGCCTTAAATCATATATAATATAAAAAGAAGTTATTTAGATCGGAAGAGCGGTTTCAG      |
| chr1  | 186310110 | 186310149 | TPR_2484     | - | GTGACCTATGCACCAGACGTTTAAACTCTTCCAAAACATGGAACACAGTGTTTTTAATAAGATCGGAAGAGCGGTTTCAG        |
| chr1  | 186310334 | 186310373 | TPR_2485     | - | GTGACCTATGCACCAGACGTTAGTTATCAAGAGTGGAAAGCATGTTGTTTTAATAATAAAAAGATCGGAAGAGCGGTTTCAG      |
| chr1  | 186312408 | 186312447 | TPR_2486     | - | GTGACCTATGCACCAGACGTTAAGCTTTAAGAAAGCACTGTTAAATCAAAGAGAAGCAAGATCGGAAGAGCGGTTTCAG         |
| chr1  | 186312988 | 186313027 | TPR_2487     | - | GTGACCTATGCACCAGACGTTTCTTACTGCTTCACTTTCTGTGTATAACAACATGAAATAGATCGGAAGAGCGGTTTCAG        |
| chr1  | 186314662 | 186314701 | TPR_2488     | - | GTGACCTATGCACCAGACGTTCAATTTATGAGAAATGAGCTCGATCCTAGAGAATGATTAGATCGGAAGAGCGGTTTCAG        |
| chr1  | 186315217 | 186315256 | TPR_2489     | - | GTGACCTATGCACCAGACGTTAAACCGTATAATTTTTTTTTTAACTTGAAGGATTTGAAAGATCGGAAGAGCGGTTTCAG        |
| chr1  | 186316374 | 186316413 | TPR_2490     | - | GTGACCTATGCACCAGACGTTTCTGAATTCAGAATCAATCTCAACACATTTGTTAACTTAGATCGGAAGAGCGGTTTCAG        |
| chr1  | 186319305 | 186319344 | TPR_2491     | - | GTGACCTATGCACCAGACGTTAAGTAGACCAATATAAATGTAATAAACAAGTACTTCTTAGATCGGAAGAGCGGTTTCAG        |
| chr1  | 186320412 | 186320451 | TPR_2492     | - | GTGACCTATGCACCAGACGTTACAGAGTCTGAAATTTCTGTAGGGTGTATTGTTTCAAGTAATAGATCGGAAGAGCGGTTTCAG    |
| chr1  | 186321058 | 186321097 | TPR_2493     | - | GTGACCTATGCACCAGACGTTAAGAAAGCTATGATAAAAAATGATAAAAAAGTTAAATTTAAGATCGGAAGAGCGGTTTCAG      |
| chr1  | 186322770 | 186322809 | TPR_2494     | - | GTGACCTATGCACCAGACGTTATCCCTTGCCAACCTTGCAATTAAGTTGCATTTGACATAGATCGGAAGAGCGGTTTCAG        |

chr1 186324492 186324531 TPR\_2495 - GTGACCTATGCACCAGACGTTTTTTGTTTCAAATTAATTAAGTCTAAATGTTATACTTTACAGATCGGAAGAGCGGTTTCAG

chr1 186324717 186324756 TPR\_2496 - GTGACCTATGCACCAGACGTCACCTTTGTCTGGGTTAGGTTTTTAGAGAACACAGTGTAGATCGGAAGAGCGGTTTCAG

chr1 186325368 186325407 TPR\_2497 - GTGACCTATGCACCAGACGTATAAAGTTATTTTTAAGGAATAATTTAGAAATGTATATAAAGATCGGAAGAGCGGTTTCAG

chr1 186326479 186326518 TPR\_2498 - GTGACCTATGCACCAGACGTACATACCTCAGCTTGTGAGCAAACATTTATGAAAACCTCAGATCGGAAGAGCGGTTTCAG

chr1 186327625 186327664 TPR\_2499 - GTGACCTATGCACCAGACGTTTTTTGTTTGTTCCTACTTTTTAAAAACCTGACTGCCAGAGATCGGAAGAGCGGTTTCAG

chr1 186328881 186328920 TPR\_2500 - GTGACCTATGCACCAGACGTTTCCTAAAATTTAGCCGTGGTGAACAATACAAATGAGAAATAGATCGGAAGAGCGGTTTCAG

chr1 186329355 186329394 TPR\_2501 - GTGACCTATGCACCAGACGTTATAAAGTTGTGTTAAATTCITTTTTCTTCAGCAAATGTATAGATCGGAAGAGCGGTTTCAG

chr1 186329847 186329886 TPR\_2502 - GTGACCTATGCACCAGACGTTAGATGCTTGTAGTGAGTTGAAATACTACAGCTTTCTAAGATCGGAAGAGCGGTTTCAG

chr1 186330704 186330743 TPR\_2503 - GTGACCTATGCACCAGACGTTTCAGTTATGGGAACATATTTTTGTTATTGTAATCTTTTTAGATCGGAAGAGCGGTTTCAG

chr1 186330871 186330910 TPR\_2504 - GTGACCTATGCACCAGACGTCACCACACATGTTAGTATCTAAATGTTGCAATGTTGACTGAGATCGGAAGAGCGGTTTCAG

chr1 186331370 186331409 TPR\_2505 - GTGACCTATGCACCAGACGTCCTATAAAATGTCTTTTTTACAAAATACTAAAGCACTTACAGATCGGAAGAGCGGTTTCAG

chr1 186331919 186331958 TPR\_2506 - GTGACCTATGCACCAGACGTTAAAATGTGTTTTCTTCATGTTGAGTATACTTACATTTAGATCGGAAGAGCGGTTTCAG

chr1 186332424 186332463 TPR\_2507 - GTGACCTATGCACCAGACGTTGATAAAGTTAATCCTAAATGCATAAATAGCTTTTTTATAAAAACAGATCGGAAGAGCGGTTTCAG

chr1 186336968 186337007 TPR\_2508 - GTGACCTATGCACCAGACGTTGTGCTTGTAGCTTTTAGCTCCATTCTTTATTTTTCTTCTAGATCGGAAGAGCGGTTTCAG

chr1 186340052 186340091 TPR\_2509 - GTGACCTATGCACCAGACGTTTTCTTAGAATAAGCTCATTGTAGACATTTTACTTGAAGGAGATCGGAAGAGCGGTTTCAG

chr1 186342441 186342480 TPR\_2510 - GTGACCTATGCACCAGACGTAATTCATCTTTGTAAGTATCTCGGAGTATCGAAATCTTACAGATCGGAAGAGCGGTTTCAG

chr1 186343960 186343999 TPR\_2511 - GTGACCTATGCACCAGACGTTGCTCTTTCCGTCCTGGTTTTGGGCTCGACTCCCAGCTTAGATCGGAAGAGCGGTTTCAG

chr6 43738394 43738433 VEGFA\_2512 - GTGACCTATGCACCAGACGTGACTGCGGGATCCCAAGGGAGGGGCTACGCCGCTCAGATCGGAAGAGCGGTTTCAG

chr6 43742028 43742067 VEGFA\_2513 - GTGACCTATGCACCAGACGTTAAAGAGAGCAAGGCATGGGCATGGGCAGGGGCTGGGTTGAGATCGGAAGAGCGGTTTCAG

chr6 43745156 43745195 VEGFA\_2514 - GTGACCTATGCACCAGACGTTGGCGATGACACATGAGCCCCGTTGGGCGACACAAAAGATGGAGATCGGAAGAGCGGTTTCAG

chr6 43746147 43746186 VEGFA\_2515 - GTGACCTATGCACCAGACGTAGGAAGCAGATCACAGAGGTTAGTGACCCAGCCAGCCATAAGATCGGAAGAGCGGTTTCAG

chr6 43746576 43746615 VEGFA\_2516 - GTGACCTATGCACCAGACGTTAGGGAGAGAGAAAAGAGCAAACAGGGAAGGGTTAAGATAGATCGGAAGAGCGGTTTCAG

chr6 43748419 43748458 VEGFA\_2517 - GTGACCTATGCACCAGACGTTAAAAACAGAGACAGAGAGAGCGGGGGCGGTGGGGGAAGATCGGAAGAGCGGTTTCAG

chr6 43749643 43749682 VEGFA\_2518 - GTGACCTATGCACCAGACGTGCAAAAGGAAAGACACTAAGCTAGAGCATCAGCAGAGAGATCGGAAGAGCGGTTTCAG

chr6 43752228 43752267 VEGFA\_2519 - GTGACCTATGCACCAGACGTTGGAAAACAAAGGCTGGGGTTAGGGCCAAGTGAGGAGGCCAGATCGGAAGAGCGGTTTCAG

chr6 43752294 43752333 VEGFA\_2520 - GTGACCTATGCACCAGACGTTAAACCTGAGGGAGGCTCTTCTCTCTGCCGCTCACCAGATCGGAAGAGCGGTTTCAG

chr17 48712248 48712287 ABCC3\_2521 - GTGACCTATGCACCAGACGTCGCGGCTGCAAGGAAGGCGAGCGCGGTCGGACCCAGCCGCGAGATCGGAAGAGCGGTTTCAG

chr17 48733143 48733182 ABCC3\_2522 - GTGACCTATGCACCAGACGTAGAGAACAGTTTAGTGCTGTGGCCAGCCACAGAGAAATGAGATCGGAAGAGCGGTTTCAG

chr17 48734013 48734052 ABCC3\_2523 - GTGACCTATGCACCAGACGTAGCAGAGTTGGAATCCGATCCCATCGGAGGCCAGGACATAGATCGGAAGAGCGGTTTCAG

chr17 48734357 48734396 ABCC3\_2524 - GTGACCTATGCACCAGACGTAGGGCAGGGAGCCCGGGCAGAACACACACTCTGACCTAGATCGGAAGAGCGGTTTCAG

chr17 48735393 48735432 ABCC3\_2525 - GTGACCTATGCACCAGACGTGAGTGGAGGGGCGTCAAGACTGGAAGGCTGGGCTAGATCGGAAGAGCGGTTTCAG

chr17 48735746 48735785 ABCC3\_2526 - GTGACCTATGCACCAGACGTAGAGAATAGGACGGGGGAATCAGGAGTGCCACCACCCTCAGATCGGAAGAGCGGTTTCAG

chr17 48736548 48736587 ABCC3\_2527 - GTGACCTATGCACCAGACGTGTAAGCCCGCAGGCGACCCCGCAGAGGGTCAAGGTTAAGATCGGAAGAGCGGTTTCAG

chr17 48738234 48738273 ABCC3\_2528 - GTGACCTATGCACCAGACGTGAGGAAGAGGAGCTGGTTAGGAATGGGGACAGGGCTCCAGATCGGAAGAGCGGTTTCAG

chr17 48740992 48741031 ABCC3\_2529 - GTGACCTATGCACCAGACGTGAGAGAGGAGTGAGGTAGGACTGCTGCCCTTCCAGATCGGAAGAGCGGTTTCAG

chr17 48741261 48741300 ABCC3\_2530 - GTGACCTATGCACCAGACGTACAGTAGTGGGTGGACTTGGCTGCGAGCCTCTTGAAGCTAGATCGGAAGAGCGGTTTCAG

chr17 48742464 48742503 ABCC3\_2531 - GTGACCTATGCACCAGACGTACCGGTTGATAGATGACACATAGGGACAGATTACCAAAGTATAGATCGGAAGAGCGGTTTCAG

chr17 48744865 48744904 ABCC3\_2532 - GTGACCTATGCACCAGACGTAGAAGAGTGTCAAGTGGCACACCTGCTCCCTCCCTGACCAGATCGGAAGAGCGGTTTCAG

chr17 48745174 48745213 ABCC3\_2533 - GTGACCTATGCACCAGACGTTGGAGGTGGTGTCAAGGTAGAGTCCAATGAGCCCTGGCCAAGATCGGAAGAGCGGTTTCAG

chr17 48745741 48745780 ABCC3\_2534 - GTGACCTATGCACCAGACGTATGTAGTGACCCTAGAGACTGTACTTTCCAAACCCCAAGATCGGAAGAGCGGTTTCAG

chr17 48746164 48746203 ABCC3\_2535 - GTGACCTATGCACCAGACGTGAGCTGGGCTGAGGCTCAGGGAGGAGCTCAAGGGATGGGGAGATCGGAAGAGCGGTTTCAG

chr17 48746451 48746490 ABCC3\_2536 - GTGACCTATGCACCAGACGTGGACCCAGGAGTCCAGTTAGAGGCAGGGATCAGGGTTTTAGATCGGAAGAGCGGTTTCAG

chr17 48746663 48746702 ABCC3\_2537 - GTGACCTATGCACCAGACGTGAGAATTTACCTCGGGGCTTGCCCAAGGCTGGCTGAGCAGATCGGAAGAGCGGTTTCAG

chr17 48750282 48750321 ABCC3\_2538 - GTGACCTATGCACCAGACGTGCGGGGGTGGGAAAAATGGGTCAGACAGGCACAGGGAGAGATCGGAAGAGCGGTTTCAG

chr17 48750780 48750819 ABCC3\_2539 - GTGACCTATGCACCAGACGTGGCAGCAGGCTCACCCTCACCCTCCAGCACACCCCAGATCGGAAGAGCGGTTTCAG

chr17 48752673 48752712 ABCC3\_2540 - GTGACCTATGCACCAGACGTGGGAGGAGGATAGGGTTACAGTTAGTTCTCCCTGCAAGATCGGAAGAGCGGTTTCAG

chr17 48752942 48752981 ABCC3\_2541 - GTGACCTATGCACCAGACGTAGCTGGTCAGGCCAGGGAGGGGCTCAAGCACCCCCAAAGATCGGAAGAGCGGTTTCAG

chr17 48753194 48753233 ABCC3\_2542 - GTGACCTATGCACCAGACGTGAGCTAGGCTAGGAGGAGGACTCCATAAACCTGAGATCGGAAGAGCGGTTTCAG

chr17 48753589 48753628 ABCC3\_2543 - GTGACCTATGCACCAGACGTAGGACAGGGGCTGGCTCACCTGGACTAGTAGAGCGGGCAAGATCGGAAGAGCGGTTTCAG

chr17 48755055 48755094 ABCC3\_2544 - GTGACCTATGCACCAGACGTGAGAAGGATTTGGGGTCAAGGCCATGGAACCCCAACTCAGATCGGAAGAGCGGTTTCAG

chr17 48755404 48755443 ABCC3\_2545 - GTGACCTATGCACCAGACGTTAGATGAGGAGAAATGGGCGAGGGCAGGGCAGGCAAGATCGGAAGAGCGGTTTCAG

chr17 48757109 48757148 ABCC3\_2546 - GTGACCTATGCACCAGACGTGAGCTGGGTTATAGCTGGCATGCTCCCTCCCACTGAGATCGGAAGAGCGGTTTCAG

chr17 48760921 48760960 ABCC3\_2547 - GTGACCTATGCACCAGACGTGGGCAGATGGGTCACATCAGCTGCCAGTGAAGCCCTCTAGATCGGAAGAGCGGTTTCAG

chr17 48761260 48761299 ABCC3\_2548 - GTGACCTATGCACCAGACGTAAAGGAAGGGCTCTGAGGGGAAAGCTGAGAGGTCAAAGGAGATCGGAAGAGCGGTTTCAG

chr17 48762020 48762059 ABCC3\_2549 - GTGACCTATGCACCAGACGTAACGTGGCCTCAGAGGGAGGCAGCTTAGGCCCTAGGAAGATCGGAAGAGCGGTTTCAG

chr17 48764847 48764886 ABCC3\_2550 - GTGACCTATGCACCAGACGTAGAAGGACGATTTCCAGCTGGGGCTCCCACTGCCTAGATCGGAAGAGCGGTTTCAG

chr17 48768403 48768442 ABCC3\_2551 - GTGACCTATGCACCAGACGTAAAGAGAGAGTGGTCAAGTTTTCCATGACCCTGACCTAGATCGGAAGAGCGGTTTCAG

chr11 35160801 35160840 CD44\_2552 - GTGACCTATGCACCAGACGTGCGAAGCGAGGGCGGGCGAAAGGAGCTGGAGGTCCCTAGATCGGAAGAGCGGTTTCAG

|       |           |           |             |   |                                                                                     |
|-------|-----------|-----------|-------------|---|-------------------------------------------------------------------------------------|
| chr11 | 35198072  | 35198111  | CD44_2553   | - | GTGACCTATGCACCAGACGTAAATAGAAATGTTAGATTCTTTTGCATAAATAATTTGGAGAGATCGGAAGAGCGGTTTCAG   |
| chr11 | 35201771  | 35201810  | CD44_2554   | - | GTGACCTATGCACCAGACGTAAAAACAACAGGATATTGACCTAAATGGCTAAGATGGGAATAGATCGGAAGAGCGGTTTCAG  |
| chr11 | 35208329  | 35208368  | CD44_2555   | - | GTGACCTATGCACCAGACGTGGAAAAAAGGATGAGAACCCTTTAAAAACATGAGGAAAAAGATCGGAAGAGCGGTTTCAG    |
| chr11 | 35211332  | 35211371  | CD44_2556   | - | GTGACCTATGCACCAGACGTGAAAAGGTACTTACAGAACTTACAGCTCATATTTGAGTAGATCGGAAGAGCGGTTTCAG     |
| chr11 | 35218243  | 35218282  | CD44_2557   | - | GTGACCTATGCACCAGACGTCATGATTGAATTTGATTGTTGAAAGATTAATTAACGGTTCAGATCGGAAGAGCGGTTTCAG   |
| chr11 | 35219618  | 35219657  | CD44_2558   | - | GTGACCTATGCACCAGACGTGACTTGCTATTGAGTGGCTGAGCTGGACGCAAGCAACCCACAGATCGGAAGAGCGGTTTCAG  |
| chr11 | 35222579  | 35222618  | CD44_2559   | - | GTGACCTATGCACCAGACGTGATGATTAAGCAATTAGAAAAATGTTATTTCTTGAGCTAGATCGGAAGAGCGGTTTCAG     |
| chr11 | 35223168  | 35223207  | CD44_2560   | - | GTGACCTATGCACCAGACGTGATGGTTAAATACACTGTGACTTGTATCAACCAATCTTTAGATCGGAAGAGCGGTTTCAG    |
| chr11 | 35226009  | 35226048  | CD44_2561   | - | GTGACCTATGCACCAGACGTAAATATCAGTTGGGAGACATAATTGTCTATTTTCTCACCAGATCGGAAGAGCGGTTTCAG    |
| chr11 | 35227609  | 35227648  | CD44_2562   | - | GTGACCTATGCACCAGACGTGCAGTTTGAGCAATTGTCAAAGTGTAAATGGACGCTTGGTAGATCGGAAGAGCGGTTTCAG   |
| chr11 | 35229602  | 35229641  | CD44_2563   | - | GTGACCTATGCACCAGACGTCAATATTAGTGTATTGCTTGTATTTCCCAAACCACTACCTAGATCGGAAGAGCGGTTTCAG   |
| chr11 | 35231462  | 35231501  | CD44_2564   | - | GTGACCTATGCACCAGACGTGAGGAATGAATCCAGTGTAATTTGAAAGCTACGGTACAAAAGATCGGAAGAGCGGTTTCAG   |
| chr11 | 35232743  | 35232782  | CD44_2565   | - | GTGACCTATGCACCAGACGTGTGGAAATCAGTGTGAACCCGATTTTGTAAAGATCACCCACAGATCGGAAGAGCGGTTTCAG  |
| chr11 | 35236349  | 35236388  | CD44_2566   | - | GTGACCTATGCACCAGACGTCAATCAGGAAGGTCAGTACTGCATGTTTTACTTACACTCAGATCGGAAGAGCGGTTTCAG    |
| chr11 | 35240813  | 35240852  | CD44_2567   | - | GTGACCTATGCACCAGACGTAAACAACATCTCTCAACCAAGTTTGAATGTGTAAACATAGATCGGAAGAGCGGTTTCAG     |
| chr11 | 35243151  | 35243190  | CD44_2568   | - | GTGACCTATGCACCAGACGTAAATTAATGACATGCGTGAGCTTCAGAGACACACTTTGAGATCGGAAGAGCGGTTTCAG     |
| chr11 | 35243202  | 35243241  | CD44_2569   | - | GTGACCTATGCACCAGACGTCAAAGCCAAGGCAAGGGATGCCAAGATGATCAGCCATAGATCGGAAGAGCGGTTTCAG      |
| chr11 | 35250626  | 35250665  | CD44_2570   | - | GTGACCTATGCACCAGACGTGAAAATGTACCATATCAGAAAGATTGCAGTACTCAGCCAGATCGGAAGAGCGGTTTCAG     |
| chr19 | 10677684  | 10677723  | CDKN2D_2571 | - | GTGACCTATGCACCAGACGTCCCTCTCCAGCAAGAGAACCCTGGGGTTATGTATCAGAAGATCGGAAGAGCGGTTTCAG     |
| chr19 | 10679139  | 10679178  | CDKN2D_2572 | - | GTGACCTATGCACCAGACGTGCCGGTCCAGGTTGGGGCGGGCGGCTAAGCGGGATGAGGAGATCGGAAGAGCGGTTTCAG    |
| chr5  | 149433582 | 149433621 | CSF1R_2573  | - | GTGACCTATGCACCAGACGTACAGGGAGTACCACTCTCCCTCCCAAACTTCAACTCCAGATCGGAAGAGCGGTTTCAG      |
| chr5  | 149433835 | 149433874 | CSF1R_2574  | - | GTGACCTATGCACCAGACGTTGAGGCTTGGGGTGGGTGGCCGGTAAAGCACGTTGGGCTGAGATCGGAAGAGCGGTTTCAG   |
| chr5  | 149434750 | 149434789 | CSF1R_2575  | - | GTGACCTATGCACCAGACGTGGATCCCAGGGAGGAAAAGGCAACCCAGGCTTTCCGTGAGATCGGAAGAGCGGTTTCAG     |
| chr5  | 149435539 | 149435578 | CSF1R_2576  | - | GTGACCTATGCACCAGACGTGGGCCACTCGAGCCAGCCAGCTGGGCTGGCTCCCTCTGGTAGATCGGAAGAGCGGTTTCAG   |
| chr5  | 149435732 | 149435771 | CSF1R_2577  | - | GTGACCTATGCACCAGACGTGAGGGCTTGGGCCAGGCTGGGGAGGGGTGAAGAGTCCGAGATCGGAAGAGCGGTTTCAG     |
| chr5  | 149436800 | 149436839 | CSF1R_2578  | - | GTGACCTATGCACCAGACGTACCTGGCCCTGGCTCATAGCCACCAGGCTGTGCTCCGGAGATCGGAAGAGCGGTTTCAG     |
| chr5  | 149437017 | 149437056 | CSF1R_2579  | - | GTGACCTATGCACCAGACGTCCCAGGGCCAGCCCCATTTGCTTGATAACAAGGAAAAAGAGATCGGAAGAGCGGTTTCAG    |
| chr5  | 149439213 | 149439252 | CSF1R_2580  | - | GTGACCTATGCACCAGACGTGCAAAGGACAAGAAAAAGGCCAGGCTCTGGGAGGCAAGGATCAGATCGGAAGAGCGGTTTCAG |
| chr5  | 149440375 | 149440414 | CSF1R_2581  | - | GTGACCTATGCACCAGACGTTGGGTTCTCTGGGCCAAGGCTTTGGGGCTCTGGGCAATAGATCGGAAGAGCGGTTTCAG     |
| chr5  | 149441004 | 149441043 | CSF1R_2582  | - | GTGACCTATGCACCAGACGTGGAGGGGATGAGGGAAGGGATGGGGGTTGAGATGCTGGAGATCGGAAGAGCGGTTTCAG     |
| chr5  | 149441236 | 149441275 | CSF1R_2583  | - | GTGACCTATGCACCAGACGTAGCTCATCACTCCACAGCTTCCATACAGGGCCTGTGGGAGATCGGAAGAGCGGTTTCAG     |
| chr5  | 149447728 | 149447767 | CSF1R_2584  | - | GTGACCTATGCACCAGACGTGCGGAGTGGGGCTGCCAGGTGCCTGAGTGAGCCAGATTTGAGATCGGAAGAGCGGTTTCAG   |
| chr5  | 149449695 | 149449734 | CSF1R_2585  | - | GTGACCTATGCACCAGACGTTCCACTCACCTCCCTCAGCTGGGCTCAGGGGCTGGGCACCAGATCGGAAGAGCGGTTTCAG   |
| chr5  | 149449969 | 149450008 | CSF1R_2586  | - | GTGACCTATGCACCAGACGTGGGCCGAGCCCACTGGGGCGGAGGCCCTGGGACTGCCTAGATCGGAAGAGCGGTTTCAG     |
| chr5  | 149452814 | 149452853 | CSF1R_2587  | - | GTGACCTATGCACCAGACGTTCAAGCTCCGCTCTACAGCCGACACCAGATGGGGTATAGATCGGAAGAGCGGTTTCAG      |
| chr5  | 149456789 | 149456828 | CSF1R_2588  | - | GTGACCTATGCACCAGACGTGGGTGGTGGTGACAGTCCGATAGGATCCTGCAGGAGTGTAGATCGGAAGAGCGGTTTCAG    |
| chr5  | 149457625 | 149457664 | CSF1R_2589  | - | GTGACCTATGCACCAGACGTGCAGATCACAAGGTGAAGTCTGGCCATCTCCAGCACACAGATCGGAAGAGCGGTTTCAG     |
| chr5  | 149459565 | 149459604 | CSF1R_2590  | - | GTGACCTATGCACCAGACGTCATGGGGACCCGACAGCCAGCCGTAAGAGTGGGGACAGAGATCGGAAGAGCGGTTTCAG     |
| chr5  | 149460280 | 149460319 | CSF1R_2591  | - | GTGACCTATGCACCAGACGTTGAGCCTCCTCCAAAGAGGCTGACCCGGCAGGGCCCCACTAGATCGGAAGAGCGGTTTCAG   |
| chr5  | 149465892 | 149465931 | CSF1R_2592  | - | GTGACCTATGCACCAGACGTAACGGGGGGTGGGGACTTTGTTGGGTGTGATGGAGAAGAGATCGGAAGAGCGGTTTCAG     |
| chr1  | 97544482  | 97544521  | DPYD_2593   | - | GTGACCTATGCACCAGACGTGAAACAGTGTCTGTGAACCTTTCTACCTACATATAGATCGGAAGAGCGGTTTCAG         |
| chr1  | 97547836  | 97547875  | DPYD_2594   | - | GTGACCTATGCACCAGACGTTGCTGGAATTAGAATGCTATGAGACATGTTTCTTCTTGTAGATCGGAAGAGCGGTTTCAG    |
| chr1  | 97563995  | 97564034  | DPYD_2595   | - | GTGACCTATGCACCAGACGTTGCCAACTATAAGTATGCTACTTTACTGGTTAAATATAGATCGGAAGAGCGGTTTCAG      |
| chr1  | 97658575  | 97658614  | DPYD_2596   | - | GTGACCTATGCACCAGACGTAAATCTCCTGTGTATTCTTGAGAACTCAGCCTTGGTTTCAGATCGGAAGAGCGGTTTCAG    |
| chr1  | 97700358  | 97700397  | DPYD_2597   | - | GTGACCTATGCACCAGACGTTGTTGTCTGCTCCCTTTAAAAATCTCCATCTCACAATGAGATCGGAAGAGCGGTTTCAG     |
| chr1  | 97770765  | 97770804  | DPYD_2598   | - | GTGACCTATGCACCAGACGTCCCCTCTTGCATTTGCTTTCTTGAGGTTGCTGAAAAAGATCGGAAGAGCGGTTTCAG       |
| chr1  | 97771683  | 97771722  | DPYD_2599   | - | GTGACCTATGCACCAGACGTGACTTGAATCAGTTGCCGCTATTGTAATATTGGCCACAGATCGGAAGAGCGGTTTCAG      |
| chr1  | 97839067  | 97839106  | DPYD_2600   | - | GTGACCTATGCACCAGACGTTGACAGCTGCCACTAAGTATGTCAGTGTACATAACAGGCAGATCGGAAGAGCGGTTTCAG    |
| chr1  | 97847899  | 97847938  | DPYD_2601   | - | GTGACCTATGCACCAGACGCTTTAGTATATATTTATTTTCTTCTCTCTATTTTAGATCGGAAGAGCGGTTTCAG          |
| chr1  | 97915565  | 97915604  | DPYD_2602   | - | GTGACCTATGCACCAGACGTTTTAACATCTAAAACAAGAGAATGGCATAAGTTGGTGAAGATCGGAAGAGCGGTTTCAG     |
| chr1  | 97981232  | 97981271  | DPYD_2603   | - | GTGACCTATGCACCAGACGTATTATTGAAGTCATATAGAAATGCTCTCATATATTTAAAGATCGGAAGAGCGGTTTCAG     |
| chr1  | 98015066  | 98015105  | DPYD_2604   | - | GTGACCTATGCACCAGACGTGCCATTTCCACTTAATTTCTTCAATGGATAAGTGCAGATCGGAAGAGCGGTTTCAG        |
| chr1  | 98039266  | 98039305  | DPYD_2605   | - | GTGACCTATGCACCAGACGTGGGAGCTGAAATGTGTGATGCAATTGTCTGTTATTTAGTAGATCGGAAGAGCGGTTTCAG    |
| chr1  | 98058724  | 98058763  | DPYD_2606   | - | GTGACCTATGCACCAGACGTACCATCAGAAAAATGGAGTTGTACTCCAACAGATTTTAGAGATCGGAAGAGCGGTTTCAG    |
| chr1  | 98060565  | 98060604  | DPYD_2607   | - | GTGACCTATGCACCAGACGTTGTCTTTATGCTTAATAGTGAATGATGCTATTTTATTAAGATCGGAAGAGCGGTTTCAG     |
| chr1  | 98157223  | 98157262  | DPYD_2608   | - | GTGACCTATGCACCAGACGTAAACACCTATCTGTGTACTGCTCAAAAAGAAAGGAGTAAAGATCGGAAGAGCGGTTTCAG    |
| chr1  | 98164857  | 98164896  | DPYD_2609   | - | GTGACCTATGCACCAGACGTTATTTATGTTATAGTTTATAGTTCAGAAATGATGGAGACAAAGATCGGAAGAGCGGTTTCAG  |
| chr1  | 98187016  | 98187055  | DPYD_2610   | - | GTGACCTATGCACCAGACGTATACAGCTGACATCCCCCACTACCATGCACAAGATCGGAAGAGCGGTTTCAG            |

|       |          |          |             |   |                                                                                     |
|-------|----------|----------|-------------|---|-------------------------------------------------------------------------------------|
| chr1  | 98205898 | 98205937 | DPYD_2611   | - | GTGACCTATGCACCAGACGTATTTAACTCTGCAAATGAAAATAACAGTATTTGATCTTGTAGATCGGAAGAGCGGTTTCAG   |
| chr1  | 98293620 | 98293659 | DPYD_2612   | - | GTGACCTATGCACCAGACGTGTACCATTAGCAACAGTACACAGATGTGGTAAAGAAAAAGTAGATCGGAAGAGCGGTTTCAG  |
| chr1  | 98348770 | 98348809 | DPYD_2613   | - | GTGACCTATGCACCAGACGTCTGATACACTATTTTCATGCTGAAAATTACCTCACTCCACAAGATCGGAAGAGCGGTTTCAG  |
| chr1  | 98386390 | 98386429 | DPYD_2614   | - | GTGACCTATGCACCAGACGTGCGCGCGGCTCGTGGTGGTGGCGGGTGGTGGGGAGTGCAGATCGGAAGAGCGGTTTCAG     |
| chr14 | 64694201 | 64694240 | ESR2_2615   | - | GTGACCTATGCACCAGACGTAACCTCGGTGGCCTAAAGAAAAATCTTGGGTAACATTTTCAAGATCGGAAGAGCGGTTTCAG  |
| chr14 | 64699805 | 64699844 | ESR2_2616   | - | GTGACCTATGCACCAGACGTTGAGGTGAACCTGGCCACAGAGGTCACAGGCTGAAGCGTGAGATCGGAAGAGCGGTTTCAG   |
| chr14 | 64701638 | 64701677 | ESR2_2617   | - | GTGACCTATGCACCAGACGTTAAAGGAGCTGCTCTGCTGGGATGGGATGTATGTGAGATCGGAAGAGCGGTTTCAG        |
| chr14 | 64716214 | 64716253 | ESR2_2618   | - | GTGACCTATGCACCAGACGTACACAGCTGGGCCATGTTTTATCGGGGAGAGATGCTGTTTTAGATCGGAAGAGCGGTTTCAG  |
| chr14 | 64723894 | 64723933 | ESR2_2619   | - | GTGACCTATGCACCAGACGTATACATTGTGTTTCTCTGACTTGTTTGAGTAAGGTGCAGATCGGAAGAGCGGTTTCAG      |
| chr14 | 64735463 | 64735502 | ESR2_2620   | - | GTGACCTATGCACCAGACGTGCTTCCCTTCTTATTGAATATGGGCCCTTGCTAAAAGCCCTAGATCGGAAGAGCGGTTTCAG  |
| chr14 | 64746649 | 64746688 | ESR2_2621   | - | GTGACCTATGCACCAGACGTATTGTTAACTGCTTCTTTAGTTTCTACTTTTGATTTCAAAGATCGGAAGAGCGGTTTCAG    |
| chr14 | 64749292 | 64749331 | ESR2_2622   | - | GTGACCTATGCACCAGACGTTCTTCACTTGAATATAGTTGCTAGCCATTCTCAAATCAGATCGGAAGAGCGGTTTCAG      |
| chr22 | 29668155 | 29668194 | EWSR1_2623  | - | GTGACCTATGCACCAGACGTAAACAGGAGAAATAGTGTAAAGTTAGCAGAAACAAGGAAGATCGGAAGAGCGGTTTCAG     |
| chr22 | 29668319 | 29668358 | EWSR1_2624  | - | GTGACCTATGCACCAGACGTATTAATGCAATAACTTGAATAGAGAACATCAAATACCAAGATCGGAAGAGCGGTTTCAG     |
| chr22 | 29669680 | 29669719 | EWSR1_2625  | - | GTGACCTATGCACCAGACGTAAAAACGAATGCAAGAACTTCATACATGAACTTTTGATAGATCGGAAGAGCGGTTTCAG     |
| chr22 | 29673969 | 29674008 | EWSR1_2626  | - | GTGACCTATGCACCAGACGTGGAGAGCTGCATCAGATTTTCAGGTCCTCAGAGATCTGCAGATCGGAAGAGCGGTTTCAG    |
| chr22 | 29682862 | 29682901 | EWSR1_2627  | - | GTGACCTATGCACCAGACGTGAGAAGAGAAAAAAAAGGCTTTTGAAGAGGCGTTAGATCGGAAGAGCGGTTTCAG         |
| chr22 | 29684545 | 29684584 | EWSR1_2628  | - | GTGACCTATGCACCAGACGTAGTCACATGTAAAGCCATGGCCAGCATTTACACCATGAGATCGGAAGAGCGGTTTCAG      |
| chr22 | 29687501 | 29687540 | EWSR1_2629  | - | GTGACCTATGCACCAGACGTAAACGAGAAGAAATGAAGGCCCTTCCCTTTAAAAGCCAGTACAGATCGGAAGAGCGGTTTCAG |
| chr22 | 29688076 | 29688115 | EWSR1_2630  | - | GTGACCTATGCACCAGACGTGGAAGATCATATAAATATTATTAGTGCACGCTTGCAAAGATCGGAAGAGCGGTTTCAG      |
| chr22 | 29688427 | 29688466 | EWSR1_2631  | - | GTGACCTATGCACCAGACGTCAACAAGACAGGAGAAATTATTATCATGTATCTATAGGGGTAGATCGGAAGAGCGGTTTCAG  |
| chr22 | 29692179 | 29692218 | EWSR1_2632  | - | GTGACCTATGCACCAGACGTAATAGCATAGTTAGGGCATGACTAGAATATACTAATTTGGGAGATCGGAAGAGCGGTTTCAG  |
| chr22 | 29693767 | 29693806 | EWSR1_2633  | - | GTGACCTATGCACCAGACGTACAACAGAACATCAATTAATCCCCTGACTCCCCTGTTACAGATCGGAAGAGCGGTTTCAG    |
| chr22 | 29694673 | 29694712 | EWSR1_2634  | - | GTGACCTATGCACCAGACGTAAACAAGAAACAGCAAACTATTTCTCTGTAGCACAAGAGATCGGAAGAGCGGTTTCAG      |
| chr22 | 29695174 | 29695213 | EWSR1_2635  | - | GTGACCTATGCACCAGACGTTTACATCACAGCAGAAATCACAATTTGAACTAAGGAAGATAGATCGGAAGAGCGGTTTCAG   |
| chr22 | 29695539 | 29695578 | EWSR1_2636  | - | GTGACCTATGCACCAGACGTAATAGCAGGGCGAAAGCAGTCAAGTGGTGGCTGCAGAGGCAGATCGGAAGAGCGGTTTCAG   |
| chr22 | 29696062 | 29696101 | EWSR1_2637  | - | GTGACCTATGCACCAGACGTAAAGAGGGCCCTTCGGTTAGAAATGGGAAGGGGTGAGGAAGCAGATCGGAAGAGCGGTTTCAG |
| chr3  | 10070292 | 10070331 | FANCD2_2638 | - | GTGACCTATGCACCAGACGTGCTTTGTGCACTTAAATTAATCTTCTAGAGCAAAATCGGGAAGATCGGAAGAGCGGTTTCAG  |
| chr3  | 10074466 | 10074505 | FANCD2_2639 | - | GTGACCTATGCACCAGACGTAAAAATTTTCAAGAATGTGCAAAATGAAAAGAAAAATAGATCGGAAGAGCGGTTTCAG      |
| chr3  | 10076103 | 10076142 | FANCD2_2640 | - | GTGACCTATGCACCAGACGTAAACAAGAGACTGGTACCAGTTTTCTACCATAGTTTTCCAGATCGGAAGAGCGGTTTCAG    |
| chr3  | 10076807 | 10076846 | FANCD2_2641 | - | GTGACCTATGCACCAGACGTAAAAAAATCTGTTTTCCACTTTGCTTTCTTGTTTTAAATAGATCGGAAGAGCGGTTTCAG    |
| chr3  | 10077921 | 10077960 | FANCD2_2642 | - | GTGACCTATGCACCAGACGTAGACATAGGGAGTTAGGAGATGATCTCAAATACACAATAAGATCGGAAGAGCGGTTTCAG    |
| chr3  | 10080913 | 10080952 | FANCD2_2643 | - | GTGACCTATGCACCAGACGTAGGAAGAGAAAAACAGGAACTGAGCCTTTCTGGTCAAAAATAGATCGGAAGAGCGGTTTCAG  |
| chr3  | 10081355 | 10081394 | FANCD2_2644 | - | GTGACCTATGCACCAGACGTAGACACTATTAGAACTGCAGCAGATCCCAAGAAAGAAAGATCGGAAGAGCGGTTTCAG      |
| chr3  | 10083257 | 10083296 | FANCD2_2645 | - | GTGACCTATGCACCAGACGTGAAAGAAAGAAAAAGTTGATAATTGGTTTTGAACAGAGTAGATCGGAAGAGCGGTTTCAG    |
| chr3  | 10084193 | 10084232 | FANCD2_2646 | - | GTGACCTATGCACCAGACGTAAAGCACAGAACTTAATAGGTTTTCATGTCACTACCTCAAGATCGGAAGAGCGGTTTCAG    |
| chr3  | 10084684 | 10084723 | FANCD2_2647 | - | GTGACCTATGCACCAGACGTAAATATTAGCTATGTTTTCTGCTCATTATAGTTGGTAAAGATCGGAAGAGCGGTTTCAG     |
| chr3  | 10085118 | 10085157 | FANCD2_2648 | - | GTGACCTATGCACCAGACGTGAGAGAGAAAAAATTAATCTTCTACGTACCAGAAAAAGAAAGATCGGAAGAGCGGTTTCAG   |
| chr3  | 10085463 | 10085502 | FANCD2_2649 | - | GTGACCTATGCACCAGACGTAGGAGAGAGTCAAAAAATATTATGACACATCAGCGAAACAGATCGGAAGAGCGGTTTCAG    |
| chr3  | 10088214 | 10088253 | FANCD2_2650 | - | GTGACCTATGCACCAGACGTAAATATGCAACAACAGAAAAACAGTTAACAAATCAGTACAGATCGGAAGAGCGGTTTCAG    |
| chr3  | 10089551 | 10089590 | FANCD2_2651 | - | GTGACCTATGCACCAGACGTGAAGAGTAGAGAGAGAAAAAGACTGTAGGAACAGTTAGATCGGAAGAGCGGTTTCAG       |
| chr3  | 10091008 | 10091047 | FANCD2_2652 | - | GTGACCTATGCACCAGACGTGAGAGTCAACAGAACAGTGTAAAAACAAATATGGATGGCCAGATCGGAAGAGCGGTTTCAG   |
| chr3  | 10094021 | 10094060 | FANCD2_2653 | - | GTGACCTATGCACCAGACGTAATGATGCCAACATGAGGCTAGCAGTAACATTTTTCCAGATCGGAAGAGCGGTTTCAG      |
| chr3  | 10101928 | 10101967 | FANCD2_2654 | - | GTGACCTATGCACCAGACGTATGATGAAGAAAGATGAAAATGCTGGAATGGCACAGCAAAAGATCGGAAGAGCGGTTTCAG   |
| chr3  | 10105426 | 10105465 | FANCD2_2655 | - | GTGACCTATGCACCAGACGTGAGGAAGAATGGTTTTAAACCTTTGGGCTGCCAATCTTTCCAGATCGGAAGAGCGGTTTCAG  |
| chr3  | 10106363 | 10106402 | FANCD2_2656 | - | GTGACCTATGCACCAGACGTAAACCAGACTGATGTTGCTGAGCTCAGGAATACGCAAGGCAGATCGGAAGAGCGGTTTCAG   |
| chr3  | 10107028 | 10107067 | FANCD2_2657 | - | GTGACCTATGCACCAGACGTGAAATAAATTTCTAGACCACACTTCATAGGTGTATTACTCAGATCGGAAGAGCGGTTTCAG   |
| chr3  | 10107498 | 10107537 | FANCD2_2658 | - | GTGACCTATGCACCAGACGTACAACATTTCCAACACTCTTAGTGCAAGCCAATAAAAACAGATCGGAAGAGCGGTTTCAG    |
| chr3  | 10108843 | 10108882 | FANCD2_2659 | - | GTGACCTATGCACCAGACGTCAAATACATTTCTACACTTCCAATGTTTCAGATTTAACAGATCGGAAGAGCGGTTTCAG     |
| chr3  | 10114505 | 10114544 | FANCD2_2660 | - | GTGACCTATGCACCAGACGTGACGAGGCTGAAGCTCAATGTGTACCAATTACACACCACAGATCGGAAGAGCGGTTTCAG    |
| chr3  | 10114887 | 10114926 | FANCD2_2661 | - | GTGACCTATGCACCAGACGTAAAAAGAGAAAAAGTACTCAAGTAATTAATAATCATGTTTATGATCGGAAGAGCGGTTTCAG  |
| chr3  | 10116164 | 10116203 | FANCD2_2662 | - | GTGACCTATGCACCAGACGTGTACAGACGAAACAAGAAATATAAATCTTCTATATTAAGATCGGAAGAGCGGTTTCAG      |
| chr3  | 10119715 | 10119754 | FANCD2_2663 | - | GTGACCTATGCACCAGACGTGAGGAAGGATTAGTTCAGGAATGTCCTAGTCAATTTTATAGATCGGAAGAGCGGTTTCAG    |
| chr3  | 10122734 | 10122773 | FANCD2_2664 | - | GTGACCTATGCACCAGACGTTGCAGAGTTATGAGTGAAGAAACTGCTGGATAGCGTCTCAAGATCGGAAGAGCGGTTTCAG   |
| chr3  | 10122980 | 10123019 | FANCD2_2665 | - | GTGACCTATGCACCAGACGTAATGATTTTTAGGACAGTTGCTTACAGTAATTGCTCTATTAGATCGGAAGAGCGGTTTCAG   |
| chr3  | 10127446 | 10127485 | FANCD2_2666 | - | GTGACCTATGCACCAGACGTCAAGGTAAGAGGGTTAGCTTAGTTTCTGAAAACACTTATAGATCGGAAGAGCGGTTTCAG    |
| chr3  | 10128768 | 10128807 | FANCD2_2667 | - | GTGACCTATGCACCAGACGTAAACAGAAAAACAATAAGTAAATGCTATGTGTCAGATCGGAAGAGCGGTTTCAG          |
| chr3  | 10130083 | 10130122 | FANCD2_2668 | - | GTGACCTATGCACCAGACGTAGAAGACAAAGAAATCTTACATATGGAACTTGACCTCATAGATCGGAAGAGCGGTTTCAG    |

|       |           |           |             |   |                                                                                     |
|-------|-----------|-----------|-------------|---|-------------------------------------------------------------------------------------|
| chr3  | 10130462  | 10130501  | FANCD2_2669 | - | GTGACCTATGCACCAGACGTAGTCAAATATTTGACCCACTAATTAACAAAGTAGAATACAAGATCGGAAGAGCGGTTTCAG   |
| chr3  | 10131926  | 10131965  | FANCD2_2670 | - | GTGACCTATGCACCAGACGTGAAAGCATGCGTGCCACACCATGATGCACTGCTTAGAAGATCGGAAGAGCGGTTTCAG      |
| chr3  | 10133815  | 10133854  | FANCD2_2671 | - | GTGACCTATGCACCAGACGTCAAATATATGGGCACCTCTGAGTACACGCCAAATACTTCCAGATCGGAAGAGCGGTTTCAG   |
| chr3  | 10134919  | 10134958  | FANCD2_2672 | - | GTGACCTATGCACCAGACGTGAAAGACAAGAAACCAAGGCTGAGATCTGCTCCTTTGAGCAGATCGGAAGAGCGGTTTCAG   |
| chr3  | 10135923  | 10135962  | FANCD2_2673 | - | GTGACCTATGCACCAGACGTGAGACACACTGTTACCTCTAGCTGAGGTATCTCACTGAAAAGATCGGAAGAGCGGTTTCAG   |
| chr3  | 10136834  | 10136873  | FANCD2_2674 | - | GTGACCTATGCACCAGACGTTAAGTTTATAAATGCTCTATGAAATGTCTGATTTTCATTAGATCGGAAGAGCGGTTTCAG    |
| chr3  | 10137960  | 10137999  | FANCD2_2675 | - | GTGACCTATGCACCAGACGTATAAATAACATCCCTTTTTGTGAGTTTATCATCATGCCCTAGATCGGAAGAGCGGTTTCAG   |
| chr3  | 10140354  | 10140393  | FANCD2_2676 | - | GTGACCTATGCACCAGACGTATGGACCAAGAAAATGGTGGGTTATAATGATCACATTTAGAGATCGGAAGAGCGGTTTCAG   |
| chr3  | 10142822  | 10142861  | FANCD2_2677 | - | GTGACCTATGCACCAGACGTAAAGATAAATAAATAAGCATTATAGTACTGCTCTGGGTAGATCGGAAGAGCGGTTTCAG     |
| chr14 | 75745636  | 75745675  | FOS_2678    | - | GTGACCTATGCACCAGACGTAGGCAAGCCGCGGAGGGGCCGAGGGCCGAGACAGGTTGAGATCGGAAGAGCGGTTTCAG     |
| chr14 | 75746530  | 75746569  | FOS_2679    | - | GTGACCTATGCACCAGACGTACAGAAGGGGAAAGCCGACCTGAGCGAGCAGGTTCCGGACAGATCGGAAGAGCGGTTTCAG   |
| chr14 | 75747213  | 75747252  | FOS_2680    | - | GTGACCTATGCACCAGACGTACAAAAAAGACCCGACATTAGTAAAGTGTCTGCCATCAGATCGGAAGAGCGGTTTCAG      |
| chr14 | 75747436  | 75747475  | FOS_2681    | - | GTGACCTATGCACCAGACGTAGGGATAAAGGAAAGCATTAAAGACACAGTCTTACTCAAGGGAGATCGGAAGAGCGGTTTCAG |
| chr14 | 75747757  | 75747796  | FOS_2682    | - | GTGACCTATGCACCAGACGTTCATCAAAGGGCTCGGTCTTACGCTCCATGCTGCTGATGCAGATCGGAAGAGCGGTTTCAG   |
| chr11 | 33880852  | 33880891  | LMO2_2683   | - | GTGACCTATGCACCAGACGTCCGGGCATCTTTGGGGAGGTGTTCACTGAAGACGCCGCTAGATCGGAAGAGCGGTTTCAG    |
| chr11 | 33886098  | 33886137  | LMO2_2684   | - | GTGACCTATGCACCAGACGTCCGGCCTCCACTGGGCCCTCGGAAGGGAGGCTGGGTGGTCAGATCGGAAGAGCGGTTTCAG   |
| chr11 | 33890842  | 33890881  | LMO2_2685   | - | GTGACCTATGCACCAGACGTCCCCCTGCCCTGCCACCCCGGTTGCCACCGCTCGCGAGATCGGAAGAGCGGTTTCAG       |
| chr19 | 15276129  | 15276168  | NOTCH3_2686 | - | GTGACCTATGCACCAGACGTAGAGGAATCAAGTCAAGTGGTGTGGTGTACCTGGCCAGATCGGAAGAGCGGTTTCAG       |
| chr19 | 15276548  | 15276587  | NOTCH3_2687 | - | GTGACCTATGCACCAGACGTACACACTTTGGACCTCAGAGCTGGGGCAGGCATTAGACTAGATCGGAAGAGCGGTTTCAG    |
| chr19 | 15278010  | 15278049  | NOTCH3_2688 | - | GTGACCTATGCACCAGACGTGTCGCCCTCCCAAAGGGATGCCCTCACCCATCCTACCTGAGATCGGAAGAGCGGTTTCAG    |
| chr19 | 15280847  | 15280886  | NOTCH3_2689 | - | GTGACCTATGCACCAGACGTCCCTCTGACCTTTGCCCTCCTCTGACCCTCCCTCAGAGATCGGAAGAGCGGTTTCAG       |
| chr19 | 15281092  | 15281131  | NOTCH3_2690 | - | GTGACCTATGCACCAGACGTGGCTCGCTCCCTGTCCCTGACTACGGGGACCTTGTGAACCAGATCGGAAGAGCGGTTTCAG   |
| chr19 | 15281432  | 15281471  | NOTCH3_2691 | - | GTGACCTATGCACCAGACGTGCTTGGGAGGGGTGGCGGGGCGGAGCTGGGGCGGCAGATCGGAAGAGCGGTTTCAG        |
| chr19 | 15284829  | 15284868  | NOTCH3_2692 | - | GTGACCTATGCACCAGACGTCCACTGGGATAAAGCCGTGGTGGCTGGGGAGAGGAGATGAGATCGGAAGAGCGGTTTCAG    |
| chr19 | 15289584  | 15289623  | NOTCH3_2693 | - | GTGACCTATGCACCAGACGTGTGGCGGCCTTTGGAGGAGGAGTAGGGGCGTGGCCTCTGGAGATCGGAAGAGCGGTTTCAG   |
| chr19 | 15289786  | 15289825  | NOTCH3_2694 | - | GTGACCTATGCACCAGACGTGCGAAGGGGCTGGCCTGGGACCCCGCTGTCAATCCCCAAGATCGGAAGAGCGGTTTCAG     |
| chr19 | 15290125  | 15290164  | NOTCH3_2695 | - | GTGACCTATGCACCAGACGTGCCAGGGTGGGGGACAGGATGAGAGGCTGTCTTCATTAGATCGGAAGAGCGGTTTCAG      |
| chr19 | 15290833  | 15290872  | NOTCH3_2696 | - | GTGACCTATGCACCAGACGTGCTCCCCAGGAGGGGAAGGAGGAGGTTGGGCATGCTTGGGTAGATCGGAAGAGCGGTTTCAG  |
| chr19 | 15291442  | 15291481  | NOTCH3_2697 | - | GTGACCTATGCACCAGACGTGCATGTGGCGGGCTGGCGGGGCGGAGCTGGGGCGGCAGATCGGAAGAGCGGTTTCAG       |
| chr19 | 15291722  | 15291761  | NOTCH3_2698 | - | GTGACCTATGCACCAGACGTCTTACTGGGGACCTGGGGAGGAGCCTGCCTGGGATCCTAGAGATCGGAAGAGCGGTTTCAG   |
| chr19 | 15292337  | 15292376  | NOTCH3_2699 | - | GTGACCTATGCACCAGACGTCTCTGCTTGGAGAGCAGGGACTCTGGCTTGGGATGGGGCAGATCGGAAGAGCGGTTTCAG    |
| chr19 | 15295667  | 15295706  | NOTCH3_2700 | - | GTGACCTATGCACCAGACGTGCTTCTCTTCCCTCCTCCTCCTCCATCCTCTGCCCTTAGATCGGAAGAGCGGTTTCAG      |
| chr19 | 15296018  | 15296057  | NOTCH3_2701 | - | GTGACCTATGCACCAGACGTACCTTCCCTCTGCAGCCCCAACACCATGGGCCTTAGATCGGAAGAGCGGTTTCAG         |
| chr19 | 15296248  | 15296287  | NOTCH3_2702 | - | GTGACCTATGCACCAGACGTCTTCTCAGCCTCAGACACTGCCCTCCTCCTGCCCTAGATCGGAAGAGCGGTTTCAG        |
| chr19 | 15297639  | 15297678  | NOTCH3_2703 | - | GTGACCTATGCACCAGACGTGGCTGCTCAGAGGGGCTCCTTAGATCGAGGGTGAAGTTCAGATCGGAAGAGCGGTTTCAG    |
| chr19 | 15297866  | 15297905  | NOTCH3_2704 | - | GTGACCTATGCACCAGACGTGGGCTGGGGCAGAAACAGCACACCTGGAGGGGCACAGAGGATCGGAAGAGCGGTTTCAG     |
| chr19 | 15298642  | 15298681  | NOTCH3_2705 | - | GTGACCTATGCACCAGACGTCCAATGACAGTCCGACAAGAATCAGGAGGCGGGCTTGTGAGATCGGAAGAGCGGTTTCAG    |
| chr19 | 15298996  | 15299035  | NOTCH3_2706 | - | GTGACCTATGCACCAGACGTGAGGAGAGGGAGCCGAAAGACATGCTGGGAAGGGGCAAGATCGGAAGAGCGGTTTCAG      |
| chr19 | 15299750  | 15299789  | NOTCH3_2707 | - | GTGACCTATGCACCAGACGTGGCGTGGCCTGGCGGGTCTGAGGCAAGGGGCGGGGACAAGATCGGAAGAGCGGTTTCAG     |
| chr19 | 15300034  | 15300073  | NOTCH3_2708 | - | GTGACCTATGCACCAGACGTCTCCATGCTGTGAATGGCTGGAAAGAGGGGAGAGGAAGATCGGAAGAGCGGTTTCAG       |
| chr19 | 15302185  | 15302224  | NOTCH3_2709 | - | GTGACCTATGCACCAGACGTGTTTTCTCGCAGGGACCATGGATGGATGGTTTTTGTAGGGAGATCGGAAGAGCGGTTTCAG   |
| chr19 | 15302506  | 15302545  | NOTCH3_2710 | - | GTGACCTATGCACCAGACGTGGCCAGAGGGAGCGGGGAGGCAGGCCCTCGGGTGGACATGAGATCGGAAGAGCGGTTTCAG   |
| chr19 | 15302721  | 15302760  | NOTCH3_2711 | - | GTGACCTATGCACCAGACGTCTACTCAGGAGAGTCAAGAGGGTGGGCTGGGGCAGCAAGATCGGAAGAGCGGTTTCAG      |
| chr19 | 15303138  | 15303177  | NOTCH3_2712 | - | GTGACCTATGCACCAGACGTAAAGAGTCTGGAGGGGAGGTAGTGGGGGTGTGGTCACTCAGATCGGAAGAGCGGTTTCAG    |
| chr19 | 15308261  | 15308300  | NOTCH3_2713 | - | GTGACCTATGCACCAGACGTGGCTCAGAGCCACAGTGGGCGCTGTGTGGGGCGGGGAGATCGGAAGAGCGGTTTCAG       |
| chr19 | 15311549  | 15311588  | NOTCH3_2714 | - | GTGACCTATGCACCAGACGTGGGACCTGGGACCTGGGAGCCGAGGGGCGCAGAGGGGAGTGCAGATCGGAAGAGCGGTTTCAG |
| chr19 | 15271774  | 15271813  | NOTCH3_2715 | - | GTGACCTATGCACCAGACGTGCCTTACCTGGCAGTCCCAGGACATGGCGAGGAGTACCCAGATCGGAAGAGCGGTTTCAG    |
| chr19 | 15272125  | 15272164  | NOTCH3_2716 | - | GTGACCTATGCACCAGACGTGGCTGACAGCTCGGTACCGTGTGCGCCGTGGACTCGCTAGATCGGAAGAGCGGTTTCAG     |
| chr1  | 226549111 | 226549150 | PARP1_2717  | - | GTGACCTATGCACCAGACGTAGCCGAGTACACCCGGTGGCTCTGGTATGAATTCACCAGATCGGAAGAGCGGTTTCAG      |
| chr1  | 226549620 | 226549659 | PARP1_2718  | - | GTGACCTATGCACCAGACGTGGAGTATGCTGTGTGAGCACAAAGGATGTTCTCGAGCTAGATCGGAAGAGCGGTTTCAG     |
| chr1  | 226550750 | 226550789 | PARP1_2719  | - | GTGACCTATGCACCAGACGTCCAAAGCTGTTGCTACAGCCGAGGACCCCTGGACAGCAAGATCGGAAGAGCGGTTTCAG     |
| chr1  | 226551594 | 226551633 | PARP1_2720  | - | GTGACCTATGCACCAGACGTCTGGCTCGGACTGATGCCATTTTCATGGGGACAGGTGGAAGATCGGAAGAGCGGTTTCAG    |
| chr1  | 226552653 | 226552692 | PARP1_2721  | - | GTGACCTATGCACCAGACGTGGCCTGGCGAGGGGTGGGCAATGCCTGTCTGCAAGTGTAGATCGGAAGAGCGGTTTCAG     |
| chr1  | 226553605 | 226553644 | PARP1_2722  | - | GTGACCTATGCACCAGACGTCTTCTCCCCACTTCTTCTGTGCTCCTGCCAGCTCTCCAGATCGGAAGAGCGGTTTCAG      |
| chr1  | 226555850 | 226555889 | PARP1_2723  | - | GTGACCTATGCACCAGACGTGGTTCAGAAAGGACTCAGAGTCTGCTGGCTGGGTGTGAAGATCGGAAGAGCGGTTTCAG     |
| chr1  | 226558085 | 226558124 | PARP1_2724  | - | GTGACCTATGCACCAGACGTGGCTACCAGGGCCCTCCTGGAACCTCCTCTGGCCGACTTAGATCGGAAGAGCGGTTTCAG    |
| chr1  | 226561877 | 226561916 | PARP1_2725  | - | GTGACCTATGCACCAGACGTTTATACCTTTTATCTGTGAGCATTTGCTGGATGATTAGATCGGAAGAGCGGTTTCAG       |
| chr1  | 226564759 | 226564798 | PARP1_2726  | - | GTGACCTATGCACCAGACGTAAATGCCCTTTACACTGTCTTCTAGGAAAAGGAAGGACAGATCGGAAGAGCGGTTTCAG     |

|       |           |           |            |   |                                                                                     |
|-------|-----------|-----------|------------|---|-------------------------------------------------------------------------------------|
| chr1  | 226566793 | 226566832 | PARP1_2727 | - | GTGACCTATGCACCAGACGTGAGGTTAGCTGTTGTGCAGAGACATGGGCCGTCCTGAGATCGGAAGAGCGGTTTCAG       |
| chr1  | 226567224 | 226567263 | PARP1_2728 | - | GTGACCTATGCACCAGACGTAGGACTGCCAGCAAAGTGGGCTGTGCCGCCCCCAACCCAGATCGGAAGAGCGGTTTCAG     |
| chr1  | 226567573 | 226567612 | PARP1_2729 | - | GTGACCTATGCACCAGACGTCAAGCTGCCCCCTCCAGGGCCAAAAGCCAGGGACATTGGTAGATCGGAAGAGCGGTTTCAG   |
| chr1  | 226568719 | 226568758 | PARP1_2730 | - | GTGACCTATGCACCAGACGTTCTGAATTTGTGCAACAGGGACAATGCTTCTGTATCTTATAGATCGGAAGAGCGGTTTCAG   |
| chr1  | 226570687 | 226570726 | PARP1_2731 | - | GTGACCTATGCACCAGACGTTGGGACCCCGGCTTTAGAGCTGCTTTGCAGGAATGTTTTGAGATCGGAAGAGCGGTTTCAG   |
| chr1  | 226573155 | 226573194 | PARP1_2732 | - | GTGACCTATGCACCAGACGTGGGGGAAGACTCTGGGATCTGTTGGGAGAAAAACCTGGCCAGATCGGAAGAGCGGTTTCAG   |
| chr1  | 226573977 | 226574016 | PARP1_2733 | - | GTGACCTATGCACCAGACGTTTTGTGTTAAGTGGGACACGCTGTAGGCGGACCCGTCAGATCGGAAGAGCGGTTTCAG      |
| chr1  | 226576307 | 226576346 | PARP1_2734 | - | GTGACCTATGCACCAGACGTAGCTCTGTGTCTCCTTTTCGACATTCTGCTGTCTGGATTCTAGATCGGAAGAGCGGTTTCAG  |
| chr1  | 226578061 | 226578100 | PARP1_2735 | - | GTGACCTATGCACCAGACGTCACTGCGGGGTTGCCCTGGGGGTTCAAGAGATCGGAAGAGCGGTTTCAG               |
| chr1  | 226579850 | 226579889 | PARP1_2736 | - | GTGACCTATGCACCAGACGTGGGGGCCAGATCCCTGAACTTTATGATTGCTTGAATGAGATCGGAAGAGCGGTTTCAG      |
| chr1  | 226589865 | 226589904 | PARP1_2737 | - | GTGACCTATGCACCAGACGTACTGGGGCAGCATGGGCATTGACCCCAACCCCTGAAGCTCAGATCGGAAGAGCGGTTTCAG   |
| chr17 | 64302164  | 64302203  | PRKCA_2738 | - | GTGACCTATGCACCAGACGTAACCAAGAACAAATATCTTAACATATTTCTGTTGGATAGATCGGAAGAGCGGTTTCAG      |
| chr17 | 64492269  | 64492308  | PRKCA_2739 | - | GTGACCTATGCACCAGACGTTAAAAGCAAATAAAATTAGAATAGACATGATTTAACATACAGATCGGAAGAGCGGTTTCAG   |
| chr17 | 64637423  | 64637462  | PRKCA_2740 | - | GTGACCTATGCACCAGACGTAAGAAGCACAAATGCTCATTTTTAGTCATGAAAGGACCACGTAGATCGGAAGAGCGGTTTCAG |
| chr17 | 64641451  | 64641490  | PRKCA_2741 | - | GTGACCTATGCACCAGACGTAGAAGGAGAGGGTGAGCTGGGCATATGGACTCCAACCACAGATCGGAAGAGCGGTTTCAG    |
| chr17 | 64683179  | 64683218  | PRKCA_2742 | - | GTGACCTATGCACCAGACGTAGAAGGAAAGAAAATATTACAAAAAGAGAACAGACCTATATAGATCGGAAGAGCGGTTTCAG  |
| chr17 | 64684370  | 64684409  | PRKCA_2743 | - | GTGACCTATGCACCAGACGTACACACATGCAAACTAGGTTATCTGATCATGGTTTCAGATCGGAAGAGCGGTTTCAG       |
| chr17 | 64685019  | 64685058  | PRKCA_2744 | - | GTGACCTATGCACCAGACGTCGGGAGAAAGAGTTACCACCGCAAGTTTAAACAAGCTTAGATCGGAAGAGCGGTTTCAG     |
| chr17 | 64728756  | 64728795  | PRKCA_2745 | - | GTGACCTATGCACCAGACGTAGCACAAATGGGAAACACGTGGGTCATTTTTCTGGGAAAAGATCGGAAGAGCGGTTTCAG    |
| chr17 | 64731557  | 64731596  | PRKCA_2746 | - | GTGACCTATGCACCAGACGTGTCAAGAACAACCTGAACACTTGAAGCACATATCTGGGAGATCGGAAGAGCGGTTTCAG     |
| chr17 | 64734832  | 64734871  | PRKCA_2747 | - | GTGACCTATGCACCAGACGTAGGTTCAACACATGAGCAGGGCTCCTCCCAAGCCAAAGTGGAGATCGGAAGAGCGGTTTCAG  |
| chr17 | 64737727  | 64737766  | PRKCA_2748 | - | GTGACCTATGCACCAGACGTAACCGGGCTTCAGGTTTCTCACTTGTCTTCTTAGATGCCTAGATCGGAAGAGCGGTTTCAG   |
| chr17 | 64738690  | 64738729  | PRKCA_2749 | - | GTGACCTATGCACCAGACGTCGGGTTAAACATCAGATCCTTCCCATGACATAACATGGTAGATCGGAAGAGCGGTTTCAG    |
| chr17 | 64770055  | 64770094  | PRKCA_2750 | - | GTGACCTATGCACCAGACGTACAAAACATCAATTAATTGATGTTGTAAGTCCAATAGCCAGATCGGAAGAGCGGTTTCAG    |
| chr17 | 64782935  | 64782974  | PRKCA_2751 | - | GTGACCTATGCACCAGACGTAAGAAAGAAAGATGGGAAAGTATTTAGGCAGAGTAATTCAAGATCGGAAGAGCGGTTTCAG   |
| chr17 | 64784907  | 64784946  | PRKCA_2752 | - | GTGACCTATGCACCAGACGTAAGGAGAAAAGGAGAACAATGGATGCAAGGGCTTCCCAAGATCGGAAGAGCGGTTTCAG     |
| chr17 | 64799941  | 64799980  | PRKCA_2753 | - | GTGACCTATGCACCAGACGTAAGACAAAAGAAAGGAAAGGTGAGTCAACATGACAATGCGAGATCGGAAGAGCGGTTTCAG   |
| chr18 | 45368148  | 45368187  | SMAD2_2754 | - | GTGACCTATGCACCAGACGTATCAAGTCCCATGAAAAGACTTAATGTAACAACCTTCTGAGATCGGAAGAGCGGTTTCAG    |
| chr18 | 45371661  | 45371700  | SMAD2_2755 | - | GTGACCTATGCACCAGACGTATATTTGGTTCTTAAATTTCCACAGTGTAATTATGTTTCAGATCGGAAGAGCGGTTTCAG    |
| chr18 | 45371984  | 45372023  | SMAD2_2756 | - | GTGACCTATGCACCAGACGTAATAATGTACATAAACCTATCATGTCAACTTGCCTTAGATCGGAAGAGCGGTTTCAG       |
| chr18 | 45374796  | 45374835  | SMAD2_2757 | - | GTGACCTATGCACCAGACGTTTTTCTTGTGTGAAAATAAATGCTGTATACTCATAATAGATCGGAAGAGCGGTTTCAG      |
| chr18 | 45377595  | 45377634  | SMAD2_2758 | - | GTGACCTATGCACCAGACGTATATGTTCCCTCATCATTTTTATACTGTATCACCTACTAGATCGGAAGAGCGGTTTCAG     |
| chr18 | 45391380  | 45391419  | SMAD2_2759 | - | GTGACCTATGCACCAGACGTTGCTTTGAAAATCTCCAGTTATTAGATATACATTTCTTAGATCGGAAGAGCGGTTTCAG     |
| chr18 | 45394644  | 45394683  | SMAD2_2760 | - | GTGACCTATGCACCAGACGTTCTTGAATCTCCATAAACCTGGATAGATACAAAATTTGTAGATCGGAAGAGCGGTTTCAG    |
| chr18 | 45395564  | 45395603  | SMAD2_2761 | - | GTGACCTATGCACCAGACGTTGCAAGTTTTTTTTCTGTGTTTTGAAATTAATGCTTGAACATGATCGGAAGAGCGGTTTCAG  |
| chr18 | 45396796  | 45396835  | SMAD2_2762 | - | GTGACCTATGCACCAGACGTTGCCCTCTGTGCAATCTTAGAGATCTTGTGGGAGGGGGTATGATCGGAAGAGCGGTTTCAG   |
| chr18 | 45422842  | 45422881  | SMAD2_2763 | - | GTGACCTATGCACCAGACGTTTAGATCCAGGTTTGTATCAAATATGTCAAGGAATCTGAAGATCGGAAGAGCGGTTTCAG    |
| chr15 | 67430315  | 67430354  | SMAD3_2764 | - | GTGACCTATGCACCAGACGTTTGGGAGGTCACAGGGACGGGAGGGAGGGATTCTGATGATAGATCGGAAGAGCGGTTTCAG   |
| chr15 | 67457183  | 67457222  | SMAD3_2765 | - | GTGACCTATGCACCAGACGTGGGGAGGGGCAGAAAGAGAGGGAATGTGGATTGTGCTTGAGATCGGAAGAGCGGTTTCAG    |
| chr15 | 67457541  | 67457580  | SMAD3_2766 | - | GTGACCTATGCACCAGACGTGAGACAGAGCAGAGGTGGCTCAGTGTGATGCCAGACCCAGATCGGAAGAGCGGTTTCAG     |
| chr15 | 67459067  | 67459106  | SMAD3_2767 | - | GTGACCTATGCACCAGACGTGAAGGAAGGTGGTCTGTGTTAAAGGCCCTCACAGCTTGGCTAGATCGGAAGAGCGGTTTCAG  |
| chr15 | 67462842  | 67462881  | SMAD3_2768 | - | GTGACCTATGCACCAGACGTAGACAAGTTGTGAGACTTCACAAAAGATTCTTGGCCTGGAAGATCGGAAGAGCGGTTTCAG   |
| chr15 | 67473529  | 67473568  | SMAD3_2769 | - | GTGACCTATGCACCAGACGTAGGGTGGGCTACTGGGTCATTGGGTGTCCCAAGCCCATGAGATCGGAAGAGCGGTTTCAG    |
| chr15 | 67477015  | 67477054  | SMAD3_2770 | - | GTGACCTATGCACCAGACGTTCAAGTTAGACTGGACAGGGTGCCTTTGCTCACACACAATAGATCGGAAGAGCGGTTTCAG   |
| chr15 | 67479653  | 67479692  | SMAD3_2771 | - | GTGACCTATGCACCAGACGTCACAGAAAACGGGCTGTGGGGATGGAAGTGGCCAGGTCGAGATCGGAAGAGCGGTTTCAG    |
| chr15 | 67482701  | 67482740  | SMAD3_2772 | - | GTGACCTATGCACCAGACGTTAGGCTAGGACAGGGGTTGGGTTGGGGACTTAAAAAATCTCCAGATCGGAAGAGCGGTTTCAG |
| chr9  | 135771572 | 135771611 | TSC1_2773  | - | GTGACCTATGCACCAGACGTTCAATCAGTGTTAACTTGCATATTTGTTGCCACAGAACAGGAGATCGGAAGAGCGGTTTCAG  |
| chr9  | 135772521 | 135772560 | TSC1_2774  | - | GTGACCTATGCACCAGACGTAGAAGTATTGATGACCTTGGGACTAAGCTGCCAATTCAGATCGGAAGAGCGGTTTCAG      |
| chr9  | 135772760 | 135772799 | TSC1_2775  | - | GTGACCTATGCACCAGACGTTACAGAAAGGCTTTTGTGTTTTTATAAGTGAACCTCCTAGATCGGAAGAGCGGTTTCAG     |
| chr9  | 135776052 | 135776091 | TSC1_2776  | - | GTGACCTATGCACCAGACGTGCTCGGGAGCCAGACCTTAGTGGGAAAAGCGTTTCAGACCAGATCGGAAGAGCGGTTTCAG   |
| chr9  | 135776926 | 135776965 | TSC1_2777  | - | GTGACCTATGCACCAGACGTAGGCGAGACCTGAATCTGCTGAAACCAATTTGCTAACAGATCGGAAGAGCGGTTTCAG      |
| chr9  | 135777942 | 135777981 | TSC1_2778  | - | GTGACCTATGCACCAGACGTTAGGACCAGGCAAGGCAACTGCCAGAACTCCGAGATCGGAAGAGCGGTTTCAG           |
| chr9  | 135778988 | 135779027 | TSC1_2779  | - | GTGACCTATGCACCAGACGTGGGAGGGGACAGGTGGAGCTTGCTTTTTGTTTTGTTTTGGAGATCGGAAGAGCGGTTTCAG   |
| chr9  | 135779748 | 135779787 | TSC1_2780  | - | GTGACCTATGCACCAGACGTTACTTTAGCTCCAAATCCAGCCACATGGTTCTGCTTGCAGATCGGAAGAGCGGTTTCAG     |
| chr9  | 135780918 | 135780957 | TSC1_2781  | - | GTGACCTATGCACCAGACGTGGGGCACTCTCTTCTGTGTTAAATGGTCAATTTTATGTGAGATCGGAAGAGCGGTTTCAG    |
| chr9  | 135782068 | 135782107 | TSC1_2782  | - | GTGACCTATGCACCAGACGTTGGGATTGCTATGAGTTGATAAAAACCTGACCTCGCTCTGAGATCGGAAGAGCGGTTTCAG   |
| chr9  | 135782638 | 135782677 | TSC1_2783  | - | GTGACCTATGCACCAGACGTTGCGTTACTACAGGCTTGGCTTCTTAATTGGGTTAGATCGGAAGAGCGGTTTCAG         |
| chr9  | 135785908 | 135785947 | TSC1_2784  | - | GTGACCTATGCACCAGACGTGCTGCTGCTATCCCTCTGCCAGGCACAGTGACTCACTAGATCGGAAGAGCGGTTTCAG      |



|       |           |           |             |   |                                                                                     |
|-------|-----------|-----------|-------------|---|-------------------------------------------------------------------------------------|
| chr9  | 135786339 | 135786378 | TSC1_2785   | - | GTGACCTATGCACCAGACGCTTAGTGGATTGATTAGTTGGTTTTGCCTGCCTTTAAGATCGGAAGAGCGGTTTCAG        |
| chr9  | 135786790 | 135786829 | TSC1_2786   | - | GTGACCTATGCACCAGACGTAACCTAGTGTGCCTGCTCTCCTCTGCTTTCTGGTGAAGCAGATCGGAAGAGCGGTTTCAG    |
| chr9  | 135787619 | 135787658 | TSC1_2787   | - | GTGACCTATGCACCAGACGTTCTTTGGTACTTATCTGTTTTGCAACTTTGTCTCTGGAAGAGATCGGAAGAGCGGTTTCAG   |
| chr9  | 135796700 | 135796739 | TSC1_2788   | - | GTGACCTATGCACCAGACGTTAGTGTCAAATTTAAAGAATCTTTCGAGAGATTGAAAAGATCGGAAGAGCGGTTTCAG      |
| chr9  | 135797156 | 135797195 | TSC1_2789   | - | GTGACCTATGCACCAGACGTTACTGCTTGTGTTGCTACTTAGTATACTGTTTAGATAGAGATCGGAAGAGCGGTTTCAG     |
| chr9  | 135798685 | 135798724 | TSC1_2790   | - | GTGACCTATGCACCAGACGTTCTCATATACCTGTTGGGCCCTGTGAGGTGAATGCTTTCAAGATCGGAAGAGCGGTTTCAG   |
| chr9  | 135800924 | 135800963 | TSC1_2791   | - | GTGACCTATGCACCAGACGTTGAAGGTTTGAATGAAATGGTTTTATGAGTATGTTTTCAGATCGGAAGAGCGGTTTCAG     |
| chr9  | 135802538 | 135802577 | TSC1_2792   | - | GTGACCTATGCACCAGACGTTAAATATCATAGGCTTTCATATGTTCTTCATGAGTACAACAGATCGGAAGAGCGGTTTCAG   |
| chr9  | 135804104 | 135804143 | TSC1_2793   | - | GTGACCTATGCACCAGACGTTAATATCCTTTTTAGCTTATCTTCTAGAAAAGAGAGATTGAGATCGGAAGAGCGGTTTCAG   |
| chr9  | 135771832 | 135771871 | TSC1_2794   | - | GTGACCTATGCACCAGACGTCAGTTCAAAGGCTTCCCTGGGTATGAAGGCTCGAGAGTTAAGATCGGAAGAGCGGTTTCAG   |
| chr9  | 135781197 | 135781236 | TSC1_2795   | - | GTGACCTATGCACCAGACGTGAGACCAGTATCTTCACTCCCAGTCTTTGTAATAATCCACAGATCGGAAGAGCGGTTTCAG   |
| chr16 | 4015726   | 4015765   | ADCY9_2796  | - | GTGACCTATGCACCAGACGTACCCGCTGCCCGGCTGCTCTGTTTGTGCAACACAGTAAAGATCGGAAGAGCGGTTTCAG     |
| chr16 | 4024620   | 4024659   | ADCY9_2797  | - | GTGACCTATGCACCAGACGTAATATTGCACTTCTGTCTGAATAACAGAGAGTGAATGATAGATCGGAAGAGCGGTTTCAG    |
| chr16 | 4027433   | 4027472   | ADCY9_2798  | - | GTGACCTATGCACCAGACGTAGCACTGCTTGCGGGCACCAGGGTGCCTGGCCACCTTGCCAGATCGGAAGAGCGGTTTCAG   |
| chr16 | 4029067   | 4029106   | ADCY9_2799  | - | GTGACCTATGCACCAGACGTGCTCAGCCGTTTTATTTCCACGCTCTCCTGGACTCCCTAAAGATCGGAAGAGCGGTTTCAG   |
| chr16 | 4033183   | 4033222   | ADCY9_2800  | - | GTGACCTATGCACCAGACGTCGTGGACTGGGTCTCCAGCTCTGAGCCGTTAGCTCCCTCTAGATCGGAAGAGCGGTTTCAG   |
| chr16 | 4038945   | 4038984   | ADCY9_2801  | - | GTGACCTATGCACCAGACGTTTTCTCTTCCGCTTTTTACTAAAGATGTGTTTTGTTGTTCTAGATCGGAAGAGCGGTTTCAG  |
| chr16 | 4042097   | 4042136   | ADCY9_2802  | - | GTGACCTATGCACCAGACGTGGCTGTCTGGGAAAAAGTTCAGGCAGGAAGCCCTCAGATCGGAAGAGCGGTTTCAG        |
| chr16 | 4043357   | 4043396   | ADCY9_2803  | - | GTGACCTATGCACCAGACGTCATGGCTGTTGTTCTGTCAGTTCTCTCCTGGCGCATCCAGATCGGAAGAGCGGTTTCAG     |
| chr16 | 4057319   | 4057358   | ADCY9_2804  | - | GTGACCTATGCACCAGACGTTTTGTTTTTTTTTCTACTTCTAAAACCTTCTATTAAATTCAGATCGGAAGAGCGGTTTCAG   |
| chr16 | 4163701   | 4163740   | ADCY9_2805  | - | GTGACCTATGCACCAGACGTTGCTTTACCTCGGCATCCCCCTCCCTGATCCTGATTGTAAGATCGGAAGAGCGGTTTCAG    |
| chr16 | 4016123   | 4016162   | ADCY9_2806  | - | GTGACCTATGCACCAGACGTAGAGGGACCGTGAATGTCAAAGGGGAAAGGCCAGATGAAGAAGATCGGAAGAGCGGTTTCAG  |
| chr16 | 4016520   | 4016559   | ADCY9_2807  | - | GTGACCTATGCACCAGACGTGAGCTCTAAGCAAAGCCGGACTACAGCAGCATCGGAAGAGATCGGAAGAGCGGTTTCAG     |
| chr16 | 4164124   | 4164163   | ADCY9_2808  | - | GTGACCTATGCACCAGACGTCCGCTGTGTGAGGACCAAGTGTGAGAAAATCAGCACCATCGGAAGAGCGGTTTCAG        |
| chr16 | 4164547   | 4164586   | ADCY9_2809  | - | GTGACCTATGCACCAGACGTGCTCCACGGCTGCATCCACGCCATCGGGTCCACCTGTTTCAGATCGGAAGAGCGGTTTCAG   |
| chr16 | 4164970   | 4165009   | ADCY9_2810  | - | GTGACCTATGCACCAGACGTGGTCGCCCGCGCTGTGCTTCTCCTGGTGTGTGTGGGCAGATCGGAAGAGCGGTTTCAG      |
| chr12 | 58120285  | 58120324  | AGAP2_2811  | - | GTGACCTATGCACCAGACGTGGAGAGACACCCCATCCCCACGCGGGCCGGGCACGACCAAGATCGGAAGAGCGGTTTCAG    |
| chr12 | 58120707  | 58120746  | AGAP2_2812  | - | GTGACCTATGCACCAGACGTTGGGGGGAGAAAAGGGGGTCTTTGAGCTTTCATCTCGGAAAGATCGGAAGAGCGGTTTCAG   |
| chr12 | 58121093  | 58121132  | AGAP2_2813  | - | GTGACCTATGCACCAGACGTGGGAACAGAGCGGGGGAGGGTGTGCTGAGGGTGTGCGAACAGATCGGAAGAGCGGTTTCAG   |
| chr12 | 58121414  | 58121453  | AGAP2_2814  | - | GTGACCTATGCACCAGACGTGGAGGACGCGGAGGGGGTAGGGAGTGTATGTAAGTCCGGGAGATCGGAAGAGCGGTTTCAG   |
| chr12 | 58121670  | 58121709  | AGAP2_2815  | - | GTGACCTATGCACCAGACGTGAGGTGGAGTGGAGGACTGGCCGCAGGAACGACCCTGGTAGATCGGAAGAGCGGTTTCAG    |
| chr12 | 58122051  | 58122090  | AGAP2_2816  | - | GTGACCTATGCACCAGACGTGGGAGCCGGAGGGGCGCTCAGCTGGGTGCAGAAGGGTGTGATCGGAAGAGCGGTTTCAG     |
| chr12 | 58123372  | 58123411  | AGAP2_2817  | - | GTGACCTATGCACCAGACGTGGCAGGCACCTTCCACTCCCACCCAGAACCTCATCCCCAAGATCGGAAGAGCGGTTTCAG    |
| chr12 | 58124228  | 58124267  | AGAP2_2818  | - | GTGACCTATGCACCAGACGTGACCTTCCATCTGCTGTCTTCCACACCCAAATAGGATGAGATCGGAAGAGCGGTTTCAG     |
| chr12 | 58124524  | 58124563  | AGAP2_2819  | - | GTGACCTATGCACCAGACGTTTTATGACATAGGAGACGAAGAGGGCCAGGGCTGGGAAAGATCGGAAGAGCGGTTTCAG     |
| chr12 | 58125099  | 58125138  | AGAP2_2820  | - | GTGACCTATGCACCAGACGTGAGACTGGGCCACATTGGCCAGCTTTGGATTTCCTCAAGATCGGAAGAGCGGTTTCAG      |
| chr12 | 58125289  | 58125328  | AGAP2_2821  | - | GTGACCTATGCACCAGACGTGAGGGCTGGGACAGGCTAGGGGCAGCTGGTCTTGTAGTTGAGATCGGAAGAGCGGTTTCAG   |
| chr12 | 58125542  | 58125581  | AGAP2_2822  | - | GTGACCTATGCACCAGACGTTGGACATGCTGACCCCATCCTCCTGTCGCCCATGACCTGAGATCGGAAGAGCGGTTTCAG    |
| chr12 | 58126136  | 58126175  | AGAP2_2823  | - | GTGACCTATGCACCAGACGTGTTTCAGAGTCTGCAGAGGGGGCCGTAAGATGCAGAGGGGAGATCGGAAGAGCGGTTTCAG   |
| chr12 | 58126578  | 58126617  | AGAP2_2824  | - | GTGACCTATGCACCAGACGTTGATCTCCAGCATATGTGGGAAGCCAGAGCAAGGGCCCTGAGATCGGAAGAGCGGTTTCAG   |
| chr12 | 58127759  | 58127798  | AGAP2_2825  | - | GTGACCTATGCACCAGACGTTGTTAGGAAAGCACTGCTTTAAGGGAGGCCCTAAGGAGGCAGATCGGAAGAGCGGTTTCAG   |
| chr12 | 58128052  | 58128091  | AGAP2_2826  | - | GTGACCTATGCACCAGACGTAGGTGGTGGGGACAGGCTGGCTGGGGTCAAGACTGGCCAAGATCGGAAGAGCGGTTTCAG    |
| chr12 | 58128325  | 58128364  | AGAP2_2827  | - | GTGACCTATGCACCAGACGTAAGAGCCATAGTAAGCTAACCATTTGGGGTTCAGGGATCCAGAGATCGGAAGAGCGGTTTCAG |
| chr12 | 58129102  | 58129141  | AGAP2_2828  | - | GTGACCTATGCACCAGACGTCAGTCCCCTTGCTATAGGGAAGGCTGACCTCCCACCCACAGATCGGAAGAGCGGTTTCAG    |
| chr12 | 58130812  | 58130851  | AGAP2_2829  | - | GTGACCTATGCACCAGACGTTCAAGGGCTTGAACAAGAGGGAGGGTACCTGGAATGCAGATCGGAAGAGCGGTTTCAG      |
| chr12 | 58135645  | 58135684  | AGAP2_2830  | - | GTGACCTATGCACCAGACGTGGTCAAGCTTCAACTTGGGTGTATCAGGGACTAGCAGGTGAGATCGGAAGAGCGGTTTCAG   |
| chr12 | 58131201  | 58131240  | AGAP2_2831  | - | GTGACCTATGCACCAGACGTGGGAAGTTGTCCTCGGAAAGGCAAGAGTAAGACCTTGGAGATCGGAAGAGCGGTTTCAG     |
| chr12 | 58131590  | 58131629  | AGAP2_2832  | - | GTGACCTATGCACCAGACGTGGGGCGCCCCACCTCCTCCCGCGCCCCCTGCTCAGCAGAGATCGGAAGAGCGGTTTCAG     |
| chr19 | 49458755  | 49458794  | BAX_2833    | - | GTGACCTATGCACCAGACGTAAGGAAGGGAAAGAGGTACCTGGACTCTGGGTTCTAGGGGAGATCGGAAGAGCGGTTTCAG   |
| chr19 | 49458894  | 49458933  | BAX_2834    | - | GTGACCTATGCACCAGACGTGATGGAGTGAGGGTGCAGAATCAGAACGGGGTGTCACTCCAGATCGGAAGAGCGGTTTCAG   |
| chr19 | 49459405  | 49459444  | BAX_2835    | - | GTGACCTATGCACCAGACGTGAGGAGAAGCCGTGCCGGGAGCAGCATCAGGCTGATGGAGATCGGAAGAGCGGTTTCAG     |
| chr19 | 49464017  | 49464056  | BAX_2836    | - | GTGACCTATGCACCAGACGTTGGAGTGGCGTGTAGGCATGACACCTTGTCCCCTGCTCCAGATCGGAAGAGCGGTTTCAG    |
| chr19 | 49464739  | 49464778  | BAX_2837    | - | GTGACCTATGCACCAGACGTGGACATCAGTCTGTTGACTGCTCGGCCAGGGGCAGCCCCAGATCGGAAGAGCGGTTTCAG    |
| chr2  | 60679650  | 60679689  | BCL11A_2838 | - | GTGACCTATGCACCAGACGTGGTGGGGTGGACGCTGCCGCCAGTGCAGCTCAGCTGGAGATCGGAAGAGCGGTTTCAG      |
| chr2  | 60679660  | 60679699  | BCL11A_2839 | - | GTGACCTATGCACCAGACGTAGCCCCAGGGGTGGGGTGGACGCTGCCGCCAGTGCAGATCGGAAGAGCGGTTTCAG        |
| chr2  | 60687489  | 60687528  | BCL11A_2840 | - | GTGACCTATGCACCAGACGTATACCCCTCCCTCACTCCCACCTGACACCCCTTTTTACAGATCGGAAGAGCGGTTTCAG     |
| chr2  | 60687767  | 60687806  | BCL11A_2841 | - | GTGACCTATGCACCAGACGTTGGGAAAGTCTCAAGAAGTGTAGCAATCTCCTCAGATCGGAAGAGCGGTTTCAG          |
| chr2  | 60689367  | 60689406  | BCL11A_2842 | - | GTGACCTATGCACCAGACGTTCTTAGGACTGAGTGCAAGATGTCTTCAAGCCACCTTAGATCGGAAGAGCGGTTTCAG      |

|       |           |           |             |   |                                                                                        |
|-------|-----------|-----------|-------------|---|----------------------------------------------------------------------------------------|
| chr2  | 60695817  | 60695856  | BCL11A_2843 | - | GTGACCTATGCACCAGACGTCTTATTTCTTCTACAAATGTCCATGTGTATAGAGATGAGAGATCGGAAGAGCGGTTTCAG       |
| chr2  | 60773056  | 60773095  | BCL11A_2844 | - | GTGACCTATGCACCAGACGTAGCAAGGAGAAAAGCTGTTTTGCATGTTTTCTTTTCATTTTAGATCGGAAGAGCGGTTTCAG     |
| chr2  | 60688203  | 60688242  | BCL11A_2845 | - | GTGACCTATGCACCAGACGTTTAATGGCCGCGGCTGCTCCCCGGGCGAGTCGGCCTCGGGAGATCGGAAGAGCGGTTTCAG      |
| chr2  | 60688639  | 60688678  | BCL11A_2846 | - | GTGACCTATGCACCAGACGTGGCAGCGCCAGCAGCGCGCTCAAGTCCGTGGTGGCCAAGTAGATCGGAAGAGCGGTTTCAG      |
| chr2  | 60689075  | 60689114  | BCL11A_2847 | - | GTGACCTATGCACCAGACGTGCCATGGATTTCTCTAGGAGACTTAGAGAGCTGGCAGGGAGATCGGAAGAGCGGTTTCAG       |
| chr2  | 60687893  | 60687932  | BCL11A_2848 | - | GTGACCTATGCACCAGACGTGTGGACGGGAGGATCTCGGGGCGCAGCGGCACGGGAAGTAGATCGGAAGAGCGGTTTCAG       |
| chr2  | 60688297  | 60688336  | BCL11A_2849 | - | GTGACCTATGCACCAGACGTAAAGCGGCCAACCTGGCCGAGGCGCCAGGGACAGAGATCGGAAGAGCGGTTTCAG            |
| chr2  | 60688701  | 60688740  | BCL11A_2850 | - | GTGACCTATGCACCAGACGTCAAGTCCGACGACGGTCTCTCCACCGCCAGCTCCCCGGAAGATCGGAAGAGCGGTTTCAG       |
| chr2  | 60689105  | 60689144  | BCL11A_2851 | - | GTGACCTATGCACCAGACGTGCGGTTGAATCCAATGGCTATGGAGCCTCCGCCATGGATAGATCGGAAGAGCGGTTTCAG       |
| chr22 | 23595936  | 23595975  | BCR_2852    | - | GTGACCTATGCACCAGACGTAAAGAAGCATCCTGTGTAGAGACAGAGAAGGGAGCATCCAGATCGGAAGAGCGGTTTCAG       |
| chr22 | 23603087  | 23603126  | BCR_2853    | - | GTGACCTATGCACCAGACGTAATAGACAGAAGTCAGCCTGGAAGGGTGGTAGGGGGATTTCAGATCGGAAGAGCGGTTTCAG     |
| chr22 | 23603492  | 23603531  | BCR_2854    | - | GTGACCTATGCACCAGACGTGCACAAGTGAAGTACAGAGTGGAGAGGGCTGCCATCCGAGATCGGAAGAGCGGTTTCAG        |
| chr22 | 23610545  | 23610584  | BCR_2855    | - | GTGACCTATGCACCAGACGTGGAAGGGAAGAGAGTGGGACAGGTGCTGCTCTCCCCAAAGATCGGAAGAGCGGTTTCAG        |
| chr22 | 23613669  | 23613708  | BCR_2856    | - | GTGACCTATGCACCAGACGTAAAGCGCATGTTACACAGATGACAGAAGCAGCTTTGATAGATCGGAAGAGCGGTTTCAG        |
| chr22 | 23615218  | 23615257  | BCR_2857    | - | GTGACCTATGCACCAGACGTAGAGGGGAGGTGAGAGAGTTGCACATGGAGAAGCACACCAGATCGGAAGAGCGGTTTCAG       |
| chr22 | 23615771  | 23615810  | BCR_2858    | - | GTGACCTATGCACCAGACGTAAAGAAAGACTTGAGTTAGACACAGAGGAGCACTGGCACCTAGATCGGAAGAGCGGTTTCAG     |
| chr22 | 23626114  | 23626153  | BCR_2859    | - | GTGACCTATGCACCAGACGTAGGGTAAGGCTGGGGTCAAGGGCAGCCTGGGGTGGGTGAGATCGGAAGAGCGGTTTCAG        |
| chr22 | 23627170  | 23627209  | BCR_2860    | - | GTGACCTATGCACCAGACGTGGAGGGAAGAAGCTTACATGTGACCCACTGCTTCTATGGAGATCGGAAGAGCGGTTTCAG       |
| chr22 | 23629296  | 23629335  | BCR_2861    | - | GTGACCTATGCACCAGACGTATGCCACAGCCTACCTTCCCATTCCAGCGCTCCACACAAAGATCGGAAGAGCGGTTTCAG       |
| chr22 | 23630234  | 23630273  | BCR_2862    | - | GTGACCTATGCACCAGACGTCAAGAAGAACACACCCAGTTATCTCCGCCCTGGCTACGCAAGATCGGAAGAGCGGTTTCAG      |
| chr22 | 23631654  | 23631693  | BCR_2863    | - | GTGACCTATGCACCAGACGTGGAAGAGAGTGCACCAATTGGTCAATCTGCTCCTTGGCCAGATCGGAAGAGCGGTTTCAG       |
| chr22 | 23632476  | 23632515  | BCR_2864    | - | GTGACCTATGCACCAGACGTGATCAAAGAGTCACTTCTGTTGTCCCGGAAAGGGAGGAGATCGGAAGAGCGGTTTCAG         |
| chr22 | 23634678  | 23634717  | BCR_2865    | - | GTGACCTATGCACCAGACGTAAGTGGACATGGAGAAGTCAACAGTCTTTTTCCACATCACAGATCGGAAGAGCGGTTTCAG      |
| chr22 | 23637161  | 23637200  | BCR_2866    | - | GTGACCTATGCACCAGACGTGGAAGGGAAGTGGAGTCCAGTGTGAAACAAACGGGTCAATCGAGATCGGAAGAGCGGTTTCAG    |
| chr22 | 23651561  | 23651600  | BCR_2867    | - | GTGACCTATGCACCAGACGTGGAGTCATGATTGGCAGAGGCCCTGGGGTCTGTTTCAGAGGAGATCGGAAGAGCGGTTTCAG     |
| chr22 | 23652461  | 23652500  | BCR_2868    | - | GTGACCTATGCACCAGACGTGAGAAGGGGCACAGTCTCTAATCCTTCTGGTCCATAGAGATCGGAAGAGCGGTTTCAG         |
| chr22 | 23653834  | 23653873  | BCR_2869    | - | GTGACCTATGCACCAGACGTAGGGAAATGTTCTCAGTGTCTAACAGCCCTGCTTGGGCCAAGATCGGAAGAGCGGTTTCAG      |
| chr22 | 23655024  | 23655063  | BCR_2870    | - | GTGACCTATGCACCAGACGTACGGAAATGCAGCGCCCTCTTGGAGATCCCGAGTGAAGTAGATCGGAAGAGCGGTTTCAG       |
| chr22 | 23656105  | 23656144  | BCR_2871    | - | GTGACCTATGCACCAGACGTCCGTGGTACTCCTTGGGTCCACAACGAGCCAGACTAGATCGGAAGAGCGGTTTCAG           |
| chr22 | 23656689  | 23656728  | BCR_2872    | - | GTGACCTATGCACCAGACGTCAAAGAGTCCAGCGGGTCTGCTTTTTCAACGCCACCCAGGAAAGATCGGAAGAGCGGTTTCAG    |
| chr22 | 23657570  | 23657609  | BCR_2873    | - | GTGACCTATGCACCAGACGTAGAGTAGGGAAGAGAAGAGTGGCTCAGAGCGGGGCTCACAAAGATCGGAAGAGCGGTTTCAG     |
| chr22 | 23523524  | 23523563  | BCR_2874    | - | GTGACCTATGCACCAGACGTGACGCGGCTGCCCGGGCCTGCGGGCGGTCGGGGCCTGGAGATCGGAAGAGCGGTTTCAG        |
| chr22 | 23523950  | 23523989  | BCR_2875    | - | GTGACCTATGCACCAGACGTCTCTGGTAGGGCTGGTACTCCAGGGCGGCCAAGGGGGCCAGATCGGAAGAGCGGTTTCAG       |
| chr17 | 76210348  | 76210387  | BIRC5_2876  | - | GTGACCTATGCACCAGACGTCCACCTCTGCCAACGGGTCCCGGATTCAAATCTGGCGGTAGATCGGAAGAGCGGTTTCAG       |
| chr17 | 76210711  | 76210750  | BIRC5_2877  | - | GTGACCTATGCACCAGACGTGACACAGCTGCTGAGTGGACGTGGCAGCCTGAGCAAGAAAGAGAAAGATCGGAAGAGCGGTTTCAG |
| chr17 | 76211997  | 76212036  | BIRC5_2878  | - | GTGACCTATGCACCAGACGTAAAGGGCAGAGAAGGGCATTATTGCCCGGGTCCCAAGAGATCGGAAGAGCGGTTTCAG         |
| chr17 | 76212695  | 76212734  | BIRC5_2879  | - | GTGACCTATGCACCAGACGTCAAACAACAGCGGAAAGGCAGCTGAAGGGATTAAAGCGGAGATCGGAAGAGCGGTTTCAG       |
| chr17 | 76219496  | 76219535  | BIRC5_2880  | - | GTGACCTATGCACCAGACGTAGAATAGACACATGACACTGAAACAGAGCTTCCCAGTCAAGATCGGAAGAGCGGTTTCAG       |
| chr7  | 116165067 | 116165106 | CAV1_2881   | - | GTGACCTATGCACCAGACGTGGCTGGATGAAACTGTGAGGAGGTTTTCCCTGGGCTGTGCAGATCGGAAGAGCGGTTTCAG      |
| chr7  | 116166529 | 116166568 | CAV1_2882   | - | GTGACCTATGCACCAGACGTGGAGGGCGGACGGCCAGGAGGGGAGGGCGGCAACGGCGAGATCGGAAGAGCGGTTTCAG        |
| chr7  | 116198950 | 116198989 | CAV1_2883   | - | GTGACCTATGCACCAGACGTGAAGTGCACAACATGAGCAGACAAGTAAAGAAAAGAGAAAGATCGGAAGAGCGGTTTCAG       |
| chr19 | 30303413  | 30303452  | CCNE1_2884  | - | GTGACCTATGCACCAGACGTCTCCGGCCTGAGGCCTGCGGGGCGGCGGGGTGAGGCGGAGATCGGAAGAGCGGTTTCAG        |
| chr19 | 30303546  | 30303585  | CCNE1_2885  | - | GTGACCTATGCACCAGACGTGGGTGGCACC GGCCGGGTGAGCACCCGCGGCCGCCCTCAGATCGGAAGAGCGGTTTCAG       |
| chr19 | 30303568  | 30303607  | CCNE1_2886  | - | GTGACCTATGCACCAGACGTTCCTTCGCATCCCTGTGGACCCGGGTGGCACCCGGCCGGGAGATCGGAAGAGCGGTTTCAG      |
| chr19 | 30303826  | 30303865  | CCNE1_2887  | - | GTGACCTATGCACCAGACGTGCCACCCCATGACCCCAAGGAAACACACCAAAACAGACAAGATCGGAAGAGCGGTTTCAG       |
| chr19 | 30307994  | 30308033  | CCNE1_2888  | - | GTGACCTATGCACCAGACGTGAAATACACAGAGAGGTGAGATGACAAAGCTTAGATCGGAAGAGCGGTTTCAG              |
| chr19 | 30308263  | 30308302  | CCNE1_2889  | - | GTGACCTATGCACCAGACGTACACACAACAAAATGAGGCCACAAAGGGGTAAGAATGCAGATCGGAAGAGCGGTTTCAG        |
| chr19 | 30311559  | 30311598  | CCNE1_2890  | - | GTGACCTATGCACCAGACGTATTTAGTAAGTTTTAGCACAAAGTAAATTTACTTGGAGGAAGATCGGAAGAGCGGTTTCAG      |
| chr19 | 30312579  | 30312618  | CCNE1_2891  | - | GTGACCTATGCACCAGACGTATAAAAGATGGCACTAGCACCAAGGCCAATCTCTAACAGTAGATCGGAAGAGCGGTTTCAG      |
| chr19 | 30312853  | 30312892  | CCNE1_2892  | - | GTGACCTATGCACCAGACGTACAGAGAGAAAAGACCGATGATTGAGAAAAGAAGTTCAAGATCGGAAGAGCGGTTTCAG        |
| chr19 | 30313097  | 30313136  | CCNE1_2893  | - | GTGACCTATGCACCAGACGTGAAAAGAACGCTGAGATGGATGCCACCACGCTATTCTAGATCGGAAGAGCGGTTTCAG         |
| chr19 | 30313303  | 30313342  | CCNE1_2894  | - | GTGACCTATGCACCAGACGTGACATCGTGGGCTTAATCTGAGGCTGACAACCTGGATGTAAGATCGGAAGAGCGGTTTCAG      |
| chr19 | 30314512  | 30314551  | CCNE1_2895  | - | GTGACCTATGCACCAGACGTGAATAAAAGGGACAACACATTAGAGTAGAACATATCCTTGGAGATCGGAAGAGCGGTTTCAG     |
| chr7  | 14188706  | 14188745  | DGKB_2896   | - | GTGACCTATGCACCAGACGTTTTCACTCTTAGAAAATTGAATTAGCATAATTTGGCCATGGAGATCGGAAGAGCGGTTTCAG     |
| chr7  | 14216399  | 14216438  | DGKB_2897   | - | GTGACCTATGCACCAGACGTATGTCAATCTCAGTTTTGCTTTCCTTTTGACTAAATAACAGATCGGAAGAGCGGTTTCAG       |
| chr7  | 14216414  | 14216453  | DGKB_2898   | - | GTGACCTATGCACCAGACGTAGTAGTTGATGCTATGTCAATCTCAGTTTTGCTTTCTAGATCGGAAGAGCGGTTTCAG         |
| chr7  | 14217606  | 14217645  | DGKB_2899   | - | GTGACCTATGCACCAGACGTTTCACTGAACTGACAAAGCGGTTTTGATATGGCATAGCCTCAAGATCGGAAGAGCGGTTTCAG    |
| chr7  | 14378090  | 14378129  | DGKB_2900   | - | GTGACCTATGCACCAGACGTTTCAATAATTAGTTGTTAAATGCTTTGTTAACCTGTTTTCAAAGATCGGAAGAGCGGTTTCAG    |

|       |           |           |            |   |                                                                                      |
|-------|-----------|-----------|------------|---|--------------------------------------------------------------------------------------|
| chr7  | 14384876  | 14384915  | DGKB_2901  | - | GTGACCTATGCACCAGACGTAATGAATCTCTTTTGTAAATATGATGAAATGGCTTGAGCTAGATCGGAAGAGCGGTTTCAG    |
| chr7  | 14517736  | 14517775  | DGKB_2902  | - | GTGACCTATGCACCAGACGTAAAGAGATGAAATATAGATATAGTTGCTGAATTTTGCCAGATCGGAAGAGCGGTTTCAG      |
| chr7  | 14613787  | 14613826  | DGKB_2903  | - | GTGACCTATGCACCAGACGTCCACTAAATTTTACCTTTGTACCTGTACTGTATAATCACAAAGATCGGAAGAGCGGTTTCAG   |
| chr7  | 14620437  | 14620476  | DGKB_2904  | - | GTGACCTATGCACCAGACGTTGCAACAACAAAAGCAGAAACAGTACACAACACCCTTTTCAGATCGGAAGAGCGGTTTCAG    |
| chr7  | 14622627  | 14622666  | DGKB_2905  | - | GTGACCTATGCACCAGACGTCACATACTTAATATGGCTGGGAGAGAGCAATAGCTTTAAAGATCGGAAGAGCGGTTTCAG     |
| chr7  | 14647009  | 14647048  | DGKB_2906  | - | GTGACCTATGCACCAGACGTGGATAATATTACCATTAACTCAGTTAATGTTAATTAAGATCGGAAGAGCGGTTTCAG        |
| chr7  | 14652915  | 14652954  | DGKB_2907  | - | GTGACCTATGCACCAGACGTGATTGATTTAGTGTCTATGTCATGTATGTAAAAAAGATCGGAAGAGCGGTTTCAG          |
| chr7  | 14660953  | 14660992  | DGKB_2908  | - | GTGACCTATGCACCAGACGTTTAAATCAAATTTTGTAGGTTTTTATATTTGATACTTCTAGATCGGAAGAGCGGTTTCAG     |
| chr7  | 14669811  | 14669850  | DGKB_2909  | - | GTGACCTATGCACCAGACGTAAAAACAGGTTTTTACACTTAAATTTATAGGTCATTATACAGATCGGAAGAGCGGTTTCAG    |
| chr7  | 14712504  | 14712543  | DGKB_2910  | - | GTGACCTATGCACCAGACGTCCTTATCATTCTACTATAACTTAGGATTGCTGTGACTTATAGATCGGAAGAGCGGTTTCAG    |
| chr7  | 14722128  | 14722167  | DGKB_2911  | - | GTGACCTATGCACCAGACGTATTGGAAAAAAATCCAGCATTACCCCACTGAAGACGAGATCGGAAGAGCGGTTTCAG        |
| chr7  | 14722328  | 14722367  | DGKB_2912  | - | GTGACCTATGCACCAGACGTGTGCATCTGCTTCTGAAAGTGCCATTATGTAGTGTGAGATCGGAAGAGCGGTTTCAG        |
| chr7  | 14724820  | 14724859  | DGKB_2913  | - | GTGACCTATGCACCAGACGTTTGCTGCTGGACATCATCTCCTCAAGTGAGGAAAGGTAGATCGGAAGAGCGGTTTCAG       |
| chr7  | 14733650  | 14733689  | DGKB_2914  | - | GTGACCTATGCACCAGACGTCCACAGAGGGTGGCCTGGTGGTGAGTCAGTGGGGCTCAGATCGGAAGAGCGGTTTCAG       |
| chr7  | 14741256  | 14741295  | DGKB_2915  | - | GTGACCTATGCACCAGACGTTCTCAAAGTTTCTGTGAAAACTTCAAAGATTTTCTTCTGAGATCGGAAGAGCGGTTTCAG     |
| chr7  | 14758117  | 14758156  | DGKB_2916  | - | GTGACCTATGCACCAGACGTCCTCATTTTGTACTTATCGTGATTGGGGCAGGAGAAAAGATCGGAAGAGCGGTTTCAG       |
| chr7  | 14775616  | 14775655  | DGKB_2917  | - | GTGACCTATGCACCAGACGTTTACTTTAAACATTTATAGTACAATTTCAAAGGCTAAAGATCGGAAGAGCGGTTTCAG       |
| chr7  | 14793503  | 14793542  | DGKB_2918  | - | GTGACCTATGCACCAGACGTTCTTTTCTATTAAGCTGTGCTTTTCTTCTTTTATCTGAGATCGGAAGAGCGGTTTCAG       |
| chr7  | 14797230  | 14797269  | DGKB_2919  | - | GTGACCTATGCACCAGACGTTTCTTTTATATCAGTTTTCTATATATGCTTGGAAAGAGAGATCGGAAGAGCGGTTTCAG      |
| chr7  | 14880769  | 14880808  | DGKB_2920  | - | GTGACCTATGCACCAGACGTATATTGATATTATGAGATTATTTGACATTTGTCTAGACAAGATCGGAAGAGCGGTTTCAG     |
| chr7  | 100401033 | 100401072 | EPHB4_2921 | - | GTGACCTATGCACCAGACGTCCTCCCACCCAGGGACACCCGCTCCCATTTCGGGGCAGATCGGAAGAGCGGTTTCAG        |
| chr7  | 100402738 | 100402777 | EPHB4_2922 | - | GTGACCTATGCACCAGACGTGCAGGAGCTGGAGTGGGGCTGGGAGAGCGGGGACGCTGGAAGATCGGAAGAGCGGTTTCAG    |
| chr7  | 100403073 | 100403112 | EPHB4_2923 | - | GTGACCTATGCACCAGACGTGAGAAATGGCCCTCCTTCCCGCTCTGCCCCACTCCAGATCGGAAGAGCGGTTTCAG         |
| chr7  | 100403992 | 100404031 | EPHB4_2924 | - | GTGACCTATGCACCAGACGTCGTGCTCTACCAAGCTTCTCCGAGTTCCTCAGATGTTCTCTCACCTCGGAAGAGCGGTTTCAG  |
| chr7  | 100404937 | 100404976 | EPHB4_2925 | - | GTGACCTATGCACCAGACGTGGGTAATACTGGGTGTGAGCTTCTTAGGGCCAGGTGGGCAAGATCGGAAGAGCGGTTTCAG    |
| chr7  | 100410319 | 100410358 | EPHB4_2926 | - | GTGACCTATGCACCAGACGTTCCCTGGCTTCTGCGGCCACCCGGAGTTCCACTTACACCAGATCGGAAGAGCGGTTTCAG     |
| chr7  | 100410667 | 100410706 | EPHB4_2927 | - | GTGACCTATGCACCAGACGTAAGGCTGCCCGGGCACCTGGGAACGAAGCGGGGTGGCAAGATCGGAAGAGCGGTTTCAG      |
| chr7  | 100411491 | 100411530 | EPHB4_2928 | - | GTGACCTATGCACCAGACGTTGACACCCAGAGGCCCTCGGAAGCCCTCAGTTGATGGCCAAGATCGGAAGAGCGGTTTCAG    |
| chr7  | 100414764 | 100414803 | EPHB4_2929 | - | GTGACCTATGCACCAGACGTGGAAGGGGTGAGGGTGGGGTGGAAAGACCCCAAGTAGATCGGAAGAGCGGTTTCAG         |
| chr7  | 100416092 | 100416131 | EPHB4_2930 | - | GTGACCTATGCACCAGACGTCCTCCACGCCCTGGGGTGGGTGGGCAATGGTTGTGCTCTCAGATCGGAAGAGCGGTTTCAG    |
| chr7  | 100417129 | 100417168 | EPHB4_2931 | - | GTGACCTATGCACCAGACGTGGGGCTGGGGCGGCTGGTGGTCTGGCGGGAGAGATGTACAGATCGGAAGAGCGGTTTCAG     |
| chr7  | 100417713 | 100417752 | EPHB4_2932 | - | GTGACCTATGCACCAGACGTAGCACCCAGGTGCAGTTCCTGCGGGAGGGTCCAGACCTAGATCGGAAGAGCGGTTTCAG      |
| chr7  | 100419843 | 100419882 | EPHB4_2933 | - | GTGACCTATGCACCAGACGTGAGCTTCCCCTGCGACTGCTGCTCATCCGGGGAGAGTCCAGATCGGAAGAGCGGTTTCAG     |
| chr7  | 100421216 | 100421255 | EPHB4_2934 | - | GTGACCTATGCACCAGACGTGCCCCAGGGCTCAGCCACGCCAAGGTGGGATTCCAGCCAGATCGGAAGAGCGGTTTCAG      |
| chr7  | 100421775 | 100421814 | EPHB4_2935 | - | GTGACCTATGCACCAGACGTACCCAGGACTGGAGCTCTGAGGAAACTGAGGGAGGAAGATCGGAAGAGCGGTTTCAG        |
| chr7  | 100424551 | 100424590 | EPHB4_2936 | - | GTGACCTATGCACCAGACGTTTGCGGGGGGGGCGCACCCCGTCACTCCTGGACCTCCCAGATCGGAAGAGCGGTTTCAG      |
| chr10 | 50666811  | 50666850  | ERCC6_2937 | - | GTGACCTATGCACCAGACGTTTCTAAACTTTCAAGTCCCTTTTTCTAACGGGCATTTCTAGATCGGAAGAGCGGTTTCAG     |
| chr10 | 50668369  | 50668408  | ERCC6_2938 | - | GTGACCTATGCACCAGACGTTAACTTTTTGCTTTCCAGGGTGAGACTTGCTTGATTGAAAGATCGGAAGAGCGGTTTCAG     |
| chr10 | 50669348  | 50669387  | ERCC6_2939 | - | GTGACCTATGCACCAGACGTGCTGCATGCCATACTTGAAGGAGTCCAAACAATAAGGCAGATCGGAAGAGCGGTTTCAG      |
| chr10 | 50678178  | 50678217  | ERCC6_2940 | - | GTGACCTATGCACCAGACGTTGATACGTTTGCACAGGGATGCTAGGATTAGAAAATGAGAGATCGGAAGAGCGGTTTCAG     |
| chr10 | 50678971  | 50679010  | ERCC6_2941 | - | GTGACCTATGCACCAGACGTTAACTTTAAATTTAAAGTAATCAATTGCACAAGATGATAAGATCGGAAGAGCGGTTTCAG     |
| chr10 | 50680372  | 50680411  | ERCC6_2942 | - | GTGACCTATGCACCAGACGTACAGTGGCCACTCTGGCTGTGCGTTCCCAGAGTCTTGAGAGATCGGAAGAGCGGTTTCAG     |
| chr10 | 50680905  | 50680944  | ERCC6_2943 | - | GTGACCTATGCACCAGACGTATTTTTTTTTTAAAGAAATGATTAAGTAGAAAATAGTTTATAGATCGGAAGAGCGGTTTCAG   |
| chr10 | 50681473  | 50681512  | ERCC6_2944 | - | GTGACCTATGCACCAGACGTAATGTAACAGGGAGATTGAGTGGTGTGCTGTACGTGGAGAGATCGGAAGAGCGGTTTCAG     |
| chr10 | 50682023  | 50682062  | ERCC6_2945 | - | GTGACCTATGCACCAGACGTAGACTTTCAGCGGGAAACAGGCTGGTTCTTTATGACAGCCAGATCGGAAGAGCGGTTTCAG    |
| chr10 | 50684211  | 50684250  | ERCC6_2946 | - | GTGACCTATGCACCAGACGTTAAAGACTGGAGAACTGGAGAAATGAATTGTGGACCAAGAGATAGATCGGAAGAGCGGTTTCAG |
| chr10 | 50686350  | 50686389  | ERCC6_2947 | - | GTGACCTATGCACCAGACGTCCAGGAGTTAACGAAGCATTCTTAAAGACAAGTGTGCTAGATCGGAAGAGCGGTTTCAG      |
| chr10 | 50690683  | 50690722  | ERCC6_2948 | - | GTGACCTATGCACCAGACGTAGGATGATAACTTTTTGGCATTTAATATTTAAAGTGTAGATCGGAAGAGCGGTTTCAG       |
| chr10 | 50691342  | 50691381  | ERCC6_2949 | - | GTGACCTATGCACCAGACGTTTTTAACAAGGGAGATTTCCAAGTGGAGAAGAATAATTAAGATCGGAAGAGCGGTTTCAG     |
| chr10 | 50701113  | 50701152  | ERCC6_2950 | - | GTGACCTATGCACCAGACGTATTTTCAGTACCTTTTTGTTTTGTTTTAATGCCCTCCATTAGATCGGAAGAGCGGTTTCAG    |
| chr10 | 50708534  | 50708573  | ERCC6_2951 | - | GTGACCTATGCACCAGACGTCTCTGCAGCTGTCTGAGCTCAATTAATATTTTCAGATCGGAAGAGCGGTTTCAG           |
| chr10 | 50713880  | 50713919  | ERCC6_2952 | - | GTGACCTATGCACCAGACGTATGTTCTTTCTTTCTTATTGCTATCAAGCCATTATGTAAGATCGGAAGAGCGGTTTCAG      |
| chr10 | 50732029  | 50732068  | ERCC6_2953 | - | GTGACCTATGCACCAGACGTGGGGATTATAAATACATTGTACTGTTTGCTTTATCTTAGGAGATCGGAAGAGCGGTTTCAG    |
| chr10 | 50736413  | 50736452  | ERCC6_2954 | - | GTGACCTATGCACCAGACGTTAGGAGCAGTTTCTCTGTGTTCTTGAATTGATGCCTGATGAGATCGGAAGAGCGGTTTCAG    |
| chr10 | 50738716  | 50738755  | ERCC6_2955 | - | GTGACCTATGCACCAGACGTATAACATTACAGTATTGCATTTTTGAAAAAGTCATCATTTAAGATCGGAAGAGCGGTTTCAG   |
| chr10 | 50740539  | 50740578  | ERCC6_2956 | - | GTGACCTATGCACCAGACGTCCCATCTTCTTCTTCAAAGTGGTGGTAAAAACATGACAGAGATCGGAAGAGCGGTTTCAG     |
| chr10 | 50678532  | 50678571  | ERCC6_2957 | - | GTGACCTATGCACCAGACGTAAGCATTGATGAAAAGTATAGGTTCTTTCTTACAAAAGAAAAGATCGGAAGAGCGGTTTCAG   |
| chr10 | 50732401  | 50732440  | ERCC6_2958 | - | GTGACCTATGCACCAGACGTGGGATTGCCAAAAGGCAAGGAGACCTTGGGAGTCAGACAAGATCGGAAGAGCGGTTTCAG     |

|      |           |           |           |   |                                                                                         |
|------|-----------|-----------|-----------|---|-----------------------------------------------------------------------------------------|
| chr6 | 152128998 | 152129037 | ESR1_2959 | - | GTGACCTATGCACCAGACGTGCGGGGACAGGGTGCAGACCGTGTCCCCGACAGGGCAGAAGGAGATCGGAAGAGCGGTTTCAG     |
| chr6 | 152163682 | 152163721 | ESR1_2960 | - | GTGACCTATGCACCAGACGTAAAAACAGTAAATCCATTAAACATTAGAAAAGCAAACATGAGATCGGAAGAGCGGTTTCAG       |
| chr6 | 152201740 | 152201779 | ESR1_2961 | - | GTGACCTATGCACCAGACGTCAAGAGGACAGAATTAATATTTTTCAGGAAACTTAGCCAAGATCGGAAGAGCGGTTTCAG        |
| chr6 | 152265258 | 152265297 | ESR1_2962 | - | GTGACCTATGCACCAGACGTAGGTGGAAAAAATAATAGTTTATTTTTTCCCGTGTAAAAGATCGGAAGAGCGGTTTCAG         |
| chr6 | 152332741 | 152332780 | ESR1_2963 | - | GTGACCTATGCACCAGACGTGCAAGAAAAACCCTGCTGACTCAAATGAAAAAGACTCATTAGATCGGAAGAGCGGTTTCAG       |
| chr6 | 152415470 | 152415509 | ESR1_2964 | - | GTGACCTATGCACCAGACGTAGAGAGAGAGTGTAGAGAGAGAGTAAAGACTCAAAGAGGATGAGGTAGATCGGAAGAGCGGTTTCAG |
| chr6 | 152419817 | 152419856 | ESR1_2965 | - | GTGACCTATGCACCAGACGTGAAGACACAGAAAGGACTTTAGAGCCAACCCGAGCCAGATCGGAAGAGCGGTTTCAG           |
| chr7 | 128475330 | 128475369 | FLNC_2966 | - | GTGACCTATGCACCAGACGTGAGGGGACAGACGGGCTCAGGGGGCCCCACCCTCCACTGAGATCGGAAGAGCGGTTTCAG        |
| chr7 | 128477164 | 128477203 | FLNC_2967 | - | GTGACCTATGCACCAGACGTGATGGAGGGAGACGATGGTGGGGGACAGCCAGCCGGCCAGAGATCGGAAGAGCGGTTTCAG       |
| chr7 | 128477402 | 128477441 | FLNC_2968 | - | GTGACCTATGCACCAGACGTAAAGGAGTGATGTACATGGCGCCCTCTTTTCCAGCAGCCAGATCGGAAGAGCGGTTTCAG        |
| chr7 | 128477641 | 128477680 | FLNC_2969 | - | GTGACCTATGCACCAGACGTGGAGCAGAGCCAGGTTACTCAGGGAGAGCCTACATGTGCAGATCGGAAGAGCGGTTTCAG        |
| chr7 | 128477991 | 128478030 | FLNC_2970 | - | GTGACCTATGCACCAGACGTGGAAAAAGATTGGAAGCCTCCCAATGACCATAGCCCTCAGATCGGAAGAGCGGTTTCAG         |
| chr7 | 128478271 | 128478310 | FLNC_2971 | - | GTGACCTATGCACCAGACGTGAGGTCAAAGGTTAGCTTCTAGGGGAGAGCCAGTCTGAGAAGATCGGAAGAGCGGTTTCAG       |
| chr7 | 128478607 | 128478646 | FLNC_2972 | - | GTGACCTATGCACCAGACGTGAGGGCTGTGAGCCACTCTGGACACACAGCTGCCAGATCGGAAGAGCGGTTTCAG             |
| chr7 | 128480027 | 128480066 | FLNC_2973 | - | GTGACCTATGCACCAGACGTAAAGAAAAGAGGTTGGGGTGTGAGGGGCTTGGACCAAGATCGGAAGAGCGGTTTCAG           |
| chr7 | 128480552 | 128480591 | FLNC_2974 | - | GTGACCTATGCACCAGACGTGGGGGACAGGGTGGGGGAAGAAGGCAGATCAATATCCTTGAAAGATCGGAAGAGCGGTTTCAG     |
| chr7 | 128480838 | 128480877 | FLNC_2975 | - | GTGACCTATGCACCAGACGTAGGGAGTGGTGTCCATGCCAGGAAGTGCCCCCAAAGTCAGATCGGAAGAGCGGTTTCAG         |
| chr7 | 128481174 | 128481213 | FLNC_2976 | - | GTGACCTATGCACCAGACGTGTGGGGGAGGTCGGGGTCCAGCATCGGAAGACCCCTGATGTCAGGAAGAGCGGTTTCAG         |
| chr7 | 128481458 | 128481497 | FLNC_2977 | - | GTGACCTATGCACCAGACGTGGAAGAAGGCTGAGTTGGGGAGGGAGGAGAACCAGCTTGAGATCGGAAGAGCGGTTTCAG        |
| chr7 | 128482235 | 128482274 | FLNC_2978 | - | GTGACCTATGCACCAGACGTCAACCAAGCAAAGTTCATAGCTGTGGCCTCTGCAGAGCGCAGATCGGAAGAGCGGTTTCAG       |
| chr7 | 128482579 | 128482618 | FLNC_2979 | - | GTGACCTATGCACCAGACGTGGTGCAGCTCAGCGTGGTGCCCTCCCTCAAGGCTCATCCAGATCGGAAGAGCGGTTTCAG        |
| chr7 | 128482798 | 128482837 | FLNC_2980 | - | GTGACCTATGCACCAGACGTGCGGGACTGCTGTGAGTTGGGCTCAGCCCCGACTCGACAGATCGGAAGAGCGGTTTCAG         |
| chr7 | 128483233 | 128483272 | FLNC_2981 | - | GTGACCTATGCACCAGACGTAGGAGGCTCAGTCAGGGCTCAGGGGAACACACCCCTGAGATCGGAAGAGCGGTTTCAG          |
| chr7 | 128483412 | 128483451 | FLNC_2982 | - | GTGACCTATGCACCAGACGTACCCAGAGATGTGTGTAGGGCTGCGCAGCCACCTAACCCAGATCGGAAGAGCGGTTTCAG        |
| chr7 | 128483800 | 128483839 | FLNC_2983 | - | GTGACCTATGCACCAGACGTCAATGGTAGGTCAGAACTGGATATAAGGCAAGGTCCTACAAGATCGGAAGAGCGGTTTCAG       |
| chr7 | 128484008 | 128484047 | FLNC_2984 | - | GTGACCTATGCACCAGACGTGGCAAGTGACACCATGAGGAGACTCCGGTCCACCCTACCCAGATCGGAAGAGCGGTTTCAG       |
| chr7 | 128484662 | 128484701 | FLNC_2985 | - | GTGACCTATGCACCAGACGTAGGACAGTTGTGGGTTCCCTGCACCTGGCCTCCTATCCAGATCGGAAGAGCGGTTTCAG         |
| chr7 | 128485994 | 128486033 | FLNC_2986 | - | GTGACCTATGCACCAGACGTGGGGTGGGCTGTTTCAGCAGGGGTGGGGGCAGCCTTACACAGATCGGAAGAGCGGTTTCAG       |
| chr7 | 128486305 | 128486344 | FLNC_2987 | - | GTGACCTATGCACCAGACGTGCCACAGGGGCATCAATCAGGGCTGTGCGCCCCACCCAGATCGGAAGAGCGGTTTCAG          |
| chr7 | 128486749 | 128486788 | FLNC_2988 | - | GTGACCTATGCACCAGACGTACATCCCCCATTAGCTTTCATAAGACCAGTGAAGTGAAGATCGGAAGAGCGGTTTCAG          |
| chr7 | 128487701 | 128487740 | FLNC_2989 | - | GTGACCTATGCACCAGACGTAAAGACATTAGACCCTGCCACCAGCCCTGATGGTCCCCAGATCGGAAGAGCGGTTTCAG         |
| chr7 | 128487949 | 128487988 | FLNC_2990 | - | GTGACCTATGCACCAGACGTGGCACAGGGTCAAGAGAGCCTCCGGGCGTCCCGCCCACCCAGATCGGAAGAGCGGTTTCAG       |
| chr7 | 128488565 | 128488604 | FLNC_2991 | - | GTGACCTATGCACCAGACGTAGAAGGGATAAACAGTTGGCTGGGTGGCATGGACGGGGCCAGATCGGAAGAGCGGTTTCAG       |
| chr7 | 128488797 | 128488836 | FLNC_2992 | - | GTGACCTATGCACCAGACGTAGCAGAGGTCAGGGCCCGCTGTGCTTGGAGATGACCTGAGATCGGAAGAGCGGTTTCAG         |
| chr7 | 128489185 | 128489224 | FLNC_2993 | - | GTGACCTATGCACCAGACGTAGAAAGAGTGTGAGGGCCGCTGTCTCAACGTGGGCTGGGAGATCGGAAGAGCGGTTTCAG        |
| chr7 | 128489335 | 128489374 | FLNC_2994 | - | GTGACCTATGCACCAGACGTGGAGATCCTGCTCAGGGAGCTGGTGGGCTGGAGCCAGCCAGATCGGAAGAGCGGTTTCAG        |
| chr7 | 128489980 | 128490019 | FLNC_2995 | - | GTGACCTATGCACCAGACGTAAAGGCACGGGGCACAGGGTGTGGCAGCCTCACAGGCCTAAGATCGGAAGAGCGGTTTCAG       |
| chr7 | 128490388 | 128490427 | FLNC_2996 | - | GTGACCTATGCACCAGACGTTGAGAGGGAACAGTCAAGTACTGGGGAAGGCCAGGAGTTAGATCGGAAGAGCGGTTTCAG        |
| chr7 | 128490807 | 128490846 | FLNC_2997 | - | GTGACCTATGCACCAGACGTGACACAGTTACGTGGAGACCCTGGTTTCCCCACTGCAACAGATCGGAAGAGCGGTTTCAG        |
| chr7 | 128491236 | 128491275 | FLNC_2998 | - | GTGACCTATGCACCAGACGTAGAGAAAAAGGGGCTGGGTGAGCAGCATCGGATTATCTGAAGATCGGAAGAGCGGTTTCAG       |
| chr7 | 128491459 | 128491498 | FLNC_2999 | - | GTGACCTATGCACCAGACGTAGGTGAGGGCAAGATCAGAGGCTCCTGCCCTCACCCCTGCCAGATCGGAAGAGCGGTTTCAG      |
| chr7 | 128492595 | 128492634 | FLNC_3000 | - | GTGACCTATGCACCAGACGTAGTTGGGGCATCAGGCTGCTATGACTCCAGGCAGGCCCTGAGATCGGAAGAGCGGTTTCAG       |
| chr7 | 128492832 | 128492871 | FLNC_3001 | - | GTGACCTATGCACCAGACGTTGGGTGTTAGGCAGAGCATCCTGTGGGCCCCACCCCTGAAGATCGGAAGAGCGGTTTCAG        |
| chr7 | 128493473 | 128493512 | FLNC_3002 | - | GTGACCTATGCACCAGACGTGCAAGGAACACATCTCCCTCAGTCTAGGCTGGCCAAGCCAGATCGGAAGAGCGGTTTCAG        |
| chr7 | 128493719 | 128493758 | FLNC_3003 | - | GTGACCTATGCACCAGACGTGACAAGGGTGGGTGAGCAACCTCAGAGCCCCAGCCCTAGATCGGAAGAGCGGTTTCAG          |
| chr7 | 128493978 | 128494017 | FLNC_3004 | - | GTGACCTATGCACCAGACGTAAAGGAGCCAGGGGTGAGGGAGGGAAGCGAGGGGTGAGGAAAGATCGGAAGAGCGGTTTCAG      |
| chr7 | 128494417 | 128494456 | FLNC_3005 | - | GTGACCTATGCACCAGACGTTGGGGGATGTCAGGGCAACACTGGGATTCTCTAGCCCTAGATCGGAAGAGCGGTTTCAG         |
| chr7 | 128494779 | 128494818 | FLNC_3006 | - | GTGACCTATGCACCAGACGTGCAAGGTAGTGGACTTCAGCATCATCGCCCTCACACTGGAGATCGGAAGAGCGGTTTCAG        |
| chr7 | 128495203 | 128495242 | FLNC_3007 | - | GTGACCTATGCACCAGACGTAGACCAGTCAAGCAGAGGTTCCGGGATGGAGGTTGGCAGGGAGATCGGAAGAGCGGTTTCAG      |
| chr7 | 128496522 | 128496561 | FLNC_3008 | - | GTGACCTATGCACCAGACGTACGGAGGATGCTCAGACTCCTGGGAGGCCGGGGCTGGAGAGATCGGAAGAGCGGTTTCAG        |
| chr7 | 128496749 | 128496788 | FLNC_3009 | - | GTGACCTATGCACCAGACGTAGGTTGGTGGCTTAGCCTCCATCTCCCTCCCCAAGATCGGAAGAGCGGTTTCAG              |
| chr7 | 128497122 | 128497161 | FLNC_3010 | - | GTGACCTATGCACCAGACGTAGGTTAGCAAGGCTGAGGGCAGGAGGGCTTGTGCCCAAAGATCGGAAGAGCGGTTTCAG         |
| chr7 | 128498012 | 128498051 | FLNC_3011 | - | GTGACCTATGCACCAGACGTGGTGGAGGGGGCACAAACCTAGTCAGAAGGGCTTCTGTTAGATCGGAAGAGCGGTTTCAG        |
| chr7 | 128498340 | 128498379 | FLNC_3012 | - | GTGACCTATGCACCAGACGTAGGCAGAGGGACAGGCTCACACCAGGGAGTCCCCTACTGTAGATCGGAAGAGCGGTTTCAG       |
| chr7 | 128484961 | 128485000 | FLNC_3013 | - | GTGACCTATGCACCAGACGTTGGCCCGCACCTGCTCGGGTCAAACACAGGCCGAATGGTAGATCGGAAGAGCGGTTTCAG        |
| chr2 | 216226228 | 216226267 | FN1_3014  | - | GTGACCTATGCACCAGACGTCAATCCAGAGAAACAAGCATGTCTCTGCAAGATCCATAGATCGGAAGAGCGGTTTCAG          |
| chr2 | 216226642 | 216226681 | FN1_3015  | - | GTGACCTATGCACCAGACGTATGACGACAGGTTGTGACCTATAAGATGACAGACTCTCTTAGATCGGAAGAGCGGTTTCAG       |
| chr2 | 216229552 | 216229591 | FN1_3016  | - | GTGACCTATGCACCAGACGTGTGCCAGGCTCCCTACAACTAGATAAGATAAAGGGTGTAGATCGGAAGAGCGGTTTCAG         |

|      |           |           |            |   |                                                                                       |
|------|-----------|-----------|------------|---|---------------------------------------------------------------------------------------|
| chr2 | 216230178 | 216230217 | FN1_3017   | - | GTGACCTATGCACCAGACGTACAGATCATTTTAGTGCCTTATTAAGCATTCTCACTTTCAGATCGGAAGAGCGGTTTCAG      |
| chr2 | 216232536 | 216232575 | FN1_3018   | - | GTGACCTATGCACCAGACGTGCTTTTGCATCCACTTCCGTGTTTGTCTCCCTCAAGTCCAGATCGGAAGAGCGGTTTCAG      |
| chr2 | 216234967 | 216235006 | FN1_3019   | - | GTGACCTATGCACCAGACGTACGTACTATTTAGACACAGGCTCCCTCTGCTGTACACCAAGATCGGAAGAGCGGTTTCAG      |
| chr2 | 216236582 | 216236621 | FN1_3020   | - | GTGACCTATGCACCAGACGTGTTCTCTTCACTTCTCATGGGGCAGCACAGAAAGGAATAAAGATCGGAAGAGCGGTTTCAG     |
| chr2 | 216236782 | 216236821 | FN1_3021   | - | GTGACCTATGCACCAGACGTCCAAATTTGGTACATCCCCAGGGAAGATGTAGACTATCACAGATCGGAAGAGCGGTTTCAG     |
| chr2 | 216237995 | 216238034 | FN1_3022   | - | GTGACCTATGCACCAGACGTCTTTCAGGTAACAGGAAAGATAGGACAAAACATAAAGATCGGAAGAGCGGTTTCAG          |
| chr2 | 216239887 | 216239926 | FN1_3023   | - | GTGACCTATGCACCAGACGTCTCCATGCTGTCAATTTCCCTTCTTACTACTAGCACATAGATCGGAAGAGCGGTTTCAG       |
| chr2 | 216240302 | 216240341 | FN1_3024   | - | GTGACCTATGCACCAGACGTCTTCTACTGAGGAAATGCCATTGACTTGTATGCAATCAGTAGATCGGAAGAGCGGTTTCAG     |
| chr2 | 216241171 | 216241210 | FN1_3025   | - | GTGACCTATGCACCAGACGTTCATTGCTACTAACCACATTTGTTAAACAATACCCACAATGAGATCGGAAGAGCGGTTTCAG    |
| chr2 | 216242848 | 216242887 | FN1_3026   | - | GTGACCTATGCACCAGACGTAAATGTCTTTCATATGGACAAAACCTTCTGTATAGACAAAAAGATCGGAAGAGCGGTTTCAG    |
| chr2 | 216243803 | 216243842 | FN1_3027   | - | GTGACCTATGCACCAGACGTACCGTTGTTTCATTGGAATAAAGATGGAGATCATCTCTAACAGATCGGAAGAGCGGTTTCAG    |
| chr2 | 216245484 | 216245523 | FN1_3028   | - | GTGACCTATGCACCAGACGTAATTGCACCACAGGTCGCCATGGGAGCAGCGGCTTTATGAGATCGGAAGAGCGGTTTCAG      |
| chr2 | 216246885 | 216246924 | FN1_3029   | - | GTGACCTATGCACCAGACGTACTGTTGGTTTCCATTTTCAAAGTCAAATTTTGTCTTTCAGATCGGAAGAGCGGTTTCAG      |
| chr2 | 216248693 | 216248732 | FN1_3030   | - | GTGACCTATGCACCAGACGTCTACTCTGGGGTGACACCAGCTTTTACTTATTAGATACTAGATCGGAAGAGCGGTTTCAG      |
| chr2 | 216249533 | 216249572 | FN1_3031   | - | GTGACCTATGCACCAGACGTAAATGTCTTTTCACTCTGATTAAATCAGATTCTGTTGAGATCGGAAGAGCGGTTTCAG        |
| chr2 | 216251362 | 216251401 | FN1_3032   | - | GTGACCTATGCACCAGACGTTTGTCTGCAAAGAAACTCAGAAGACTTTCCTACCCAGTTGAGATCGGAAGAGCGGTTTCAG     |
| chr2 | 216252885 | 216252924 | FN1_3033   | - | GTGACCTATGCACCAGACGTTTGGCAGTATGCTTCCATCCAGTAGCTTTTGCCTATCAATTTCAGATCGGAAGAGCGGTTTCAG  |
| chr2 | 216256305 | 216256344 | FN1_3034   | - | GTGACCTATGCACCAGACGTGAATGTATCTGTTCCATAATATTAACCTAGAGCATAGCAAGATCGGAAGAGCGGTTTCAG      |
| chr2 | 216257604 | 216257643 | FN1_3035   | - | GTGACCTATGCACCAGACGTAAAACTTCTGCGTTTGAGACATAGATGGTGTTCATGCTGAGATCGGAAGAGCGGTTTCAG      |
| chr2 | 216259201 | 216259240 | FN1_3036   | - | GTGACCTATGCACCAGACGTAATAAGCTGCTATCCTGAGAGTGACACTTCCAATAAGAGTAGATCGGAAGAGCGGTTTCAG     |
| chr2 | 216261810 | 216261849 | FN1_3037   | - | GTGACCTATGCACCAGACGTGATGGATCAGAGGGCAAGTATACACCATACCTTCCCAAGAAGATCGGAAGAGCGGTTTCAG     |
| chr2 | 216262353 | 216262392 | FN1_3038   | - | GTGACCTATGCACCAGACGTTTTTTTTCCCTTTTCTATTAGTTTTTAAAACCTGTTCTACTTAGATCGGAAGAGCGGTTTCAG   |
| chr2 | 216263930 | 216263969 | FN1_3039   | - | GTGACCTATGCACCAGACGTGATGTTCCCTAATCTGTGATACAGCCCTGAGCTGCTTTCAGATCGGAAGAGCGGTTTCAG      |
| chr2 | 216269062 | 216269101 | FN1_3040   | - | GTGACCTATGCACCAGACGTAAATGCTTCTTAACTATATTTACATTTCTTATTAGATCGGAAGAGCGGTTTCAG            |
| chr2 | 216270911 | 216270950 | FN1_3041   | - | GTGACCTATGCACCAGACGTTCCCTATCTCTATCTCCCCTCAAATTTCTCCACCCTCACTTAGATCGGAAGAGCGGTTTCAG    |
| chr2 | 216271800 | 216271839 | FN1_3042   | - | GTGACCTATGCACCAGACGTTAAGAAGACACTTCTATGTTATCTTATCAGGATTGTTCCAGATCGGAAGAGCGGTTTCAG      |
| chr2 | 216272781 | 216272820 | FN1_3043   | - | GTGACCTATGCACCAGACGTGCTCCCTCTTTGGCTGCTATGTTAATCTTAATGACATCAGATCGGAAGAGCGGTTTCAG       |
| chr2 | 216272971 | 216273010 | FN1_3044   | - | GTGACCTATGCACCAGACGTGCTACTAGTGTAAAAGAACTCTTTTCTGTAAAACACAGAGATCGGAAGAGCGGTTTCAG       |
| chr2 | 216274236 | 216274275 | FN1_3045   | - | GTGACCTATGCACCAGACGTTATCTCGCTCAAGACAGTTTCAGGCGACTGCTGGAAACAGATCGGAAGAGCGGTTTCAG       |
| chr2 | 216274607 | 216274646 | FN1_3046   | - | GTGACCTATGCACCAGACGTAAACACCCTCATGCTCCCTACCCTCAGGTTTCTAGAGACTAGATCGGAAGAGCGGTTTCAG     |
| chr2 | 216279477 | 216279516 | FN1_3047   | - | GTGACCTATGCACCAGACGTCTTATCAATTTCTGATGGTTTTTTTTTTTCCAGCTTTTGAAGATCGGAAGAGCGGTTTCAG     |
| chr2 | 216279510 | 216279549 | FN1_3048   | - | GTGACCTATGCACCAGACGTCAACCAGAAACCTTGATACTGAGTCTCCTAATCTTATCAAGATCGGAAGAGCGGTTTCAG      |
| chr2 | 216283915 | 216283954 | FN1_3049   | - | GTGACCTATGCACCAGACGTCTATTACTCGAAGTTGAGAACTGCCAATTTGGGTTATAACAAGATCGGAAGAGCGGTTTCAG    |
| chr2 | 216285346 | 216285385 | FN1_3050   | - | GTGACCTATGCACCAGACGTCTATTTCCCTAGATGAGTTTGACACAGGGGGAATGGTTAGCAGATCGGAAGAGCGGTTTCAG    |
| chr2 | 216286764 | 216286803 | FN1_3051   | - | GTGACCTATGCACCAGACGTGTTAATAACAAAATATTTGAGATGGCAAAGGTACAGAAAAGATCGGAAGAGCGGTTTCAG      |
| chr2 | 216288023 | 216288062 | FN1_3052   | - | GTGACCTATGCACCAGACGTGCCCTTGTGGGTTGTCTTGTTTGACAACAATTTAGGGAGTAGATCGGAAGAGCGGTTTCAG     |
| chr2 | 216288819 | 216288858 | FN1_3053   | - | GTGACCTATGCACCAGACGTCAAGGGGAGCCACAGAAAGTGAAGAAAACCTCACTTTTCATGAGATCGGAAGAGCGGTTTCAG   |
| chr2 | 216289767 | 216289806 | FN1_3054   | - | GTGACCTATGCACCAGACGTTCTTTTTGAAGAATAGGACTGATGACTTTTATTATTAGTTAGATCGGAAGAGCGGTTTCAG     |
| chr2 | 216292853 | 216292892 | FN1_3055   | - | GTGACCTATGCACCAGACGTGGACGAGCAGGGGCGGGAATGGGAAGCAGGTCAAGAAAAGATCGGAAGAGCGGTTTCAG       |
| chr2 | 216295388 | 216295427 | FN1_3056   | - | GTGACCTATGCACCAGACGTCACTTTATGTTAAAGATTAAGCCAGGTATTGTTTTCTGGAGATCGGAAGAGCGGTTTCAG      |
| chr2 | 216296506 | 216296545 | FN1_3057   | - | GTGACCTATGCACCAGACGTCTTAGGGCTGAGCAAGAGTGGGATGCTTACTGTTCTAATGTAGATCGGAAGAGCGGTTTCAG    |
| chr2 | 216297997 | 216298036 | FN1_3058   | - | GTGACCTATGCACCAGACGTGATTGTGTTAAAATGATGCCAAAATATCAATATGAATTTTCAGATCGGAAGAGCGGTTTCAG    |
| chr2 | 216299369 | 216299408 | FN1_3059   | - | GTGACCTATGCACCAGACGTACAAGCCCCATAGTTAGTATCTTTTAAATACATGAAGTGGTAGATCGGAAGAGCGGTTTCAG    |
| chr2 | 216300328 | 216300367 | FN1_3060   | - | GTGACCTATGCACCAGACGTACCCTGGGGCTGAAACAGGCTGCCTCAGGGATGGGACCTAAGATCGGAAGAGCGGTTTCAG     |
| chr3 | 119545585 | 119545624 | GSK3B_3061 | - | GTGACCTATGCACCAGACGTGACGCCAGCTGCACAGGAAAAACCCAGTTACTTGTAGTGATCGGAAGAGCGGTTTCAG        |
| chr3 | 119582216 | 119582255 | GSK3B_3062 | - | GTGACCTATGCACCAGACGTACACTGACCTTCCAGCTTCTAGGAAAGCTACACCCTAGATCGGAAGAGCGGTTTCAG         |
| chr3 | 119585387 | 119585426 | GSK3B_3063 | - | GTGACCTATGCACCAGACGTAATTTTTTTTTTCCAAAAATTTTCAGGGCAGGTTCTATAAAAACAGATCGGAAGAGCGGTTTCAG |
| chr3 | 119595210 | 119595249 | GSK3B_3064 | - | GTGACCTATGCACCAGACGTTTTTTTTTAAAGTATATTAATCAGTAGTTAACTAAAACAGAGATCGGAAGAGCGGTTTCAG     |
| chr3 | 119631501 | 119631540 | GSK3B_3065 | - | GTGACCTATGCACCAGACGTATCTGAATATAATGCTCATAATTATTAATTGCTTCTTGATAGATCGGAAGAGCGGTTTCAG     |
| chr3 | 119634841 | 119634880 | GSK3B_3066 | - | GTGACCTATGCACCAGACGTGTCCTCTCCCTGCCCTTCCCTTTTCCCTCCTCCCTTAGATCGGAAGAGCGGTTTCAG         |
| chr3 | 119642170 | 119642209 | GSK3B_3067 | - | GTGACCTATGCACCAGACGTACATAACAATTTTCCATTTAGAAAACATTTTTATGAACAGATCGGAAGAGCGGTTTCAG       |
| chr3 | 119666065 | 119666104 | GSK3B_3068 | - | GTGACCTATGCACCAGACGTACAAAAGTGTACTGAATATTGTGATAAATTTGTTATTAGATCGGAAGAGCGGTTTCAG        |
| chr3 | 119720843 | 119720882 | GSK3B_3069 | - | GTGACCTATGCACCAGACGTCAATTTTTCATATTTTTGTTGCTGTCGTAATACATATACAGATCGGAAGAGCGGTTTCAG      |
| chr3 | 119812144 | 119812183 | GSK3B_3070 | - | GTGACCTATGCACCAGACGTGTTTTATTTTACACCCTTTTCCACCTCGCCTTAAAATAAGATCGGAAGAGCGGTTTCAG       |
| chr6 | 114262172 | 114262211 | HDAC2_3071 | - | GTGACCTATGCACCAGACGTCTACCAATTTTCAGAAAATCATAAAAAGAAAATTTGAAAGATCGGAAGAGCGGTTTCAG       |
| chr6 | 114262822 | 114262861 | HDAC2_3072 | - | GTGACCTATGCACCAGACGTTTTCTTCAAGTACTTTTTACATACATAAAAACTAAAGATCGGAAGAGCGGTTTCAG          |
| chr6 | 114264465 | 114264504 | HDAC2_3073 | - | GTGACCTATGCACCAGACGTTTTTCTTGGTAATTTGTTTTAAATTTGAAAATTTAAAATTTAGATCGGAAGAGCGGTTTCAG    |
| chr6 | 114265394 | 114265433 | HDAC2_3074 | - | GTGACCTATGCACCAGACGTGCCTTTATTTTTCCAATTTGTCAAAATGATAATTGAAATGAGATCGGAAGAGCGGTTTCAG     |

|       |           |           |            |   |                                                                                      |
|-------|-----------|-----------|------------|---|--------------------------------------------------------------------------------------|
| chr6  | 114266476 | 114266515 | HDAC2_3075 | - | GTGACCTATGCACCAGACGTATTGAATTGTTTTGATAAACATTTTATCTTGACAAGATTAGATCGGAAGAGCGGTTTCAG     |
| chr6  | 114270093 | 114270132 | HDAC2_3076 | - | GTGACCTATGCACCAGACGCTCAAAGGGTGGTATTTCCAGAAAAAATGGTTTTCTTCCAAGATCGGAAGAGCGGTTTCAG     |
| chr6  | 114270282 | 114270321 | HDAC2_3077 | - | GTGACCTATGCACCAGACGTTTTGTTTTCACAATTGGAATGGAATTTCCAGAATGTTATTGGAGATCGGAAGAGCGGTTTCAG  |
| chr6  | 114274391 | 114274430 | HDAC2_3078 | - | GTGACCTATGCACCAGACGTATTCTGTCTGAAAAAATATTGTGAGATGAACTAGGAGATAGATCGGAAGAGCGGTTTCAG     |
| chr6  | 114277127 | 114277166 | HDAC2_3079 | - | GTGACCTATGCACCAGACGTTTATATTGATACTCTTTTCAGTGATAAAGTGTTCATTAAAGATCGGAAGAGCGGTTTCAG     |
| chr6  | 114277733 | 114277772 | HDAC2_3080 | - | GTGACCTATGCACCAGACGTGAACTCAGATTTAAAAGTTGATCTGAACTTGGTGTTAGATCGGAAGAGCGGTTTCAG        |
| chr6  | 114279763 | 114279802 | HDAC2_3081 | - | GTGACCTATGCACCAGACGCTAAGTAAAAGTAGTTTTGCTTTGATAAATGTAATAGTAGAATCGGAAGAGCGGTTTCAG      |
| chr6  | 114281020 | 114281059 | HDAC2_3082 | - | GTGACCTATGCACCAGACGCTTTTTAATACATATTCCAGCACTGATCTTTTTTATTTTTTTAGATCGGAAGAGCGGTTTCAG   |
| chr7  | 27203172  | 27203211  | HOXA9_3083 | - | GTGACCTATGCACCAGACGTGCTTATTAGAAAAAAGGGTAAGCTAGAGAGAAAAAGAAAGATCGGAAGAGCGGTTTCAG      |
| chr7  | 27204447  | 27204486  | HOXA9_3084 | - | GTGACCTATGCACCAGACGTCCTCCCTTCAAATCCGCCGCCGCCTCCACGCCGGCCTCCAGATCGGAAGAGCGGTTTCAG     |
| chr7  | 27204737  | 27204776  | HOXA9_3085 | - | GTGACCTATGCACCAGACGTGCGGCCGCCGGACGGCAGGTACATGCGCTCCTGGCTGGAGCAGATCGGAAGAGCGGTTTCAG   |
| chr11 | 64571756  | 64571795  | MEN1_3086  | - | GTGACCTATGCACCAGACGTACTTCGGACCGCTGTGGGGACCCAGGCTCCGCCCTTAGTAGATCGGAAGAGCGGTTTCAG     |
| chr11 | 64572456  | 64572495  | MEN1_3087  | - | GTGACCTATGCACCAGACGCTGCTGCACAGAGGTCTGGGCACCTACAGGTGGTGACAGCAGCAGATCGGAAGAGCGGTTTCAG  |
| chr11 | 64573057  | 64573096  | MEN1_3088  | - | GTGACCTATGCACCAGACGTGGAGCTCCAGCCTGTGTCCAGCCTCCACCTGGACAGGGCAGATCGGAAGAGCGGTTTCAG     |
| chr11 | 64573654  | 64573693  | MEN1_3089  | - | GTGACCTATGCACCAGACGTCCTACTAGGGCCTGCAGCCTGTCTTTCTCCCTCCATAGATCGGAAGAGCGGTTTCAG        |
| chr11 | 64574433  | 64574472  | MEN1_3090  | - | GTGACCTATGCACCAGACGCTAAGAGGGTGCAGAAAGGGAGACCTAACAGTGGCTGAGAGATCGGAAGAGCGGTTTCAG      |
| chr11 | 64574601  | 64574640  | MEN1_3091  | - | GTGACCTATGCACCAGACGTGGAGTGCCACAGGCTGCCCTGTGAGGCCGGGGGGTGGAGATCGGAAGAGCGGTTTCAG       |
| chr11 | 64575313  | 64575352  | MEN1_3092  | - | GTGACCTATGCACCAGACGTCCTCCCGCCAGCTTGTCGCCCTTCACTAGTAGTACGCCAAAGATCGGAAGAGCGGTTTCAG    |
| chr11 | 64577072  | 64577111  | MEN1_3093  | - | GTGACCTATGCACCAGACGTTATCCATGACCCACTTCTTCAAACCTCCATGGTTTACAAGATCGGAAGAGCGGTTTCAG      |
| chr11 | 64577087  | 64577126  | MEN1_3094  | - | GTGACCTATGCACCAGACGTAGTAGGGGAATCTTATCCATGACCCACTTCTTCAAACAGATCGGAAGAGCGGTTTCAG       |
| chr22 | 36678664  | 36678703  | MYH9_3095  | - | GTGACCTATGCACCAGACGCTGACAGCCTGAGATGGATGGACAGACAGACACCACGCCATAGATCGGAAGAGCGGTTTCAG    |
| chr22 | 36680089  | 36680128  | MYH9_3096  | - | GTGACCTATGCACCAGACGTCGCCCACCCGCCCTTTGCCTCGGCCACTTCTCTCAAAGATCGGAAGAGCGGTTTCAG        |
| chr22 | 36680399  | 36680438  | MYH9_3097  | - | GTGACCTATGCACCAGACGTGGTGGGGCAGTGAGAAGGGCAGCGGGCTGGGCAGCAGAAGATCGGAAGAGCGGTTTCAG      |
| chr22 | 36681117  | 36681156  | MYH9_3098  | - | GTGACCTATGCACCAGACGCTGCTGCCCCGCCCAACCCAGCTGTCTGGAAAAAATCTGAGATCGGAAGAGCGGTTTCAG      |
| chr22 | 36681654  | 36681693  | MYH9_3099  | - | GTGACCTATGCACCAGACGTGGACTTCTCCCACCTCTGGGCTGTGGCTGGAGCCACCACGGAGATCGGAAGAGCGGTTTCAG   |
| chr22 | 36681861  | 36681900  | MYH9_3100  | - | GTGACCTATGCACCAGACGTTGAGGGGGCAGAGTTGGGGGGGACCAGGTGTGTCCCAGGAGATCGGAAGAGCGGTTTCAG     |
| chr22 | 36682714  | 36682753  | MYH9_3101  | - | GTGACCTATGCACCAGACGTCGCAATGGAGAGCGGCACCCGCTGCCCTGCGGCCAGCAGGAGATCGGAAGAGCGGTTTCAG    |
| chr22 | 36684248  | 36684287  | MYH9_3102  | - | GTGACCTATGCACCAGACGTGCGGGGGCCAGGTGAGGGTGGGGCGGCCACCCGACTGAGCCAAGATCGGAAGAGCGGTTTCAG  |
| chr22 | 36684723  | 36684762  | MYH9_3103  | - | GTGACCTATGCACCAGACGTCCTCCTGCTACCCATGGGTGCCCAAGGCTGCCCTTAGATCGGAAGAGCGGTTTCAG         |
| chr22 | 36685081  | 36685120  | MYH9_3104  | - | GTGACCTATGCACCAGACGCTGGCCTGGCAGCCAGGTTGGAAAGGGGCCAGGTGCCCTGCTGAGATCGGAAGAGCGGTTTCAG  |
| chr22 | 36687982  | 36688021  | MYH9_3105  | - | GTGACCTATGCACCAGACGTGTTGGCCCCATCCTTGCATTTCTCTCCTTCAAGCACTGAGATCGGAAGAGCGGTTTCAG      |
| chr22 | 36689325  | 36689364  | MYH9_3106  | - | GTGACCTATGCACCAGACGTCGTTGGGGACCGGCCGACTCTGCAGGCTGGGGAGCTGCTGAGATCGGAAGAGCGGTTTCAG    |
| chr22 | 36689755  | 36689794  | MYH9_3107  | - | GTGACCTATGCACCAGACGTCGCCAGGTTCCAGAAAGTGGACCCCTCCAGAAAGGCCCTCAGATCGGAAGAGCGGTTTCAG    |
| chr22 | 36690088  | 36690127  | MYH9_3108  | - | GTGACCTATGCACCAGACGTGCCCCAGGACCCCTGGCGGGCAGCTGGGCCCTAGCAGCAGATAGATCGGAAGAGCGGTTTCAG  |
| chr22 | 36690928  | 36690967  | MYH9_3109  | - | GTGACCTATGCACCAGACGTCCTCCTGAGACCCGAGGGGGAGGGCAGGGTTCGCCCTGCTGAGATCGGAAGAGCGGTTTCAG   |
| chr22 | 36691501  | 36691540  | MYH9_3110  | - | GTGACCTATGCACCAGACGTGGACCAAGTCCCTCGGGATGGGGAGGGCAGCCAGGGGGCAGATCGGAAGAGCGGTTTCAG     |
| chr22 | 36692839  | 36692878  | MYH9_3111  | - | GTGACCTATGCACCAGACGTCGCCTGCCCGCTGAGGCCAGGTGGCCTGGGCCAGCCCTTAGATCGGAAGAGCGGTTTCAG     |
| chr22 | 36694915  | 36694954  | MYH9_3112  | - | GTGACCTATGCACCAGACGTGACGAGCAGGAGGTGATGGGCAGGGGCTGGCGGGCAAGGGAGATCGGAAGAGCGGTTTCAG    |
| chr22 | 36696123  | 36696162  | MYH9_3113  | - | GTGACCTATGCACCAGACGTTGGCTGTGCGCTGCCGCTGCTCCAGGGGGCGCCGTGGATGGAGATCGGAAGAGCGGTTTCAG   |
| chr22 | 36696847  | 36696886  | MYH9_3114  | - | GTGACCTATGCACCAGACGTCCTGCCCAGGCGGTGGCCAGGGGCTGGCCAGGGCGGAGATCGGAAGAGCGGTTTCAG        |
| chr22 | 36697530  | 36697569  | MYH9_3115  | - | GTGACCTATGCACCAGACGTTGTCAGCCCTCAGCTCAGCTCAGCAGCAGCTGCCTGCCTGAGATCGGAAGAGCGGTTTCAG    |
| chr22 | 36699991  | 36700030  | MYH9_3116  | - | GTGACCTATGCACCAGACGTGGAGATACTCCTGCCCGCATGCCAGGCCTTGCACGCCAGATCGGAAGAGCGGTTTCAG       |
| chr22 | 36701029  | 36701068  | MYH9_3117  | - | GTGACCTATGCACCAGACGCTGCTGTGCCCTGCCTCTCTGGATGGCAGCCCTTGTCTGAGATCGGAAGAGCGGTTTCAG      |
| chr22 | 36701926  | 36701965  | MYH9_3118  | - | GTGACCTATGCACCAGACGTGCCCGGAGCCCGCTTCTCCTGGGCCCTGCTGTGCGTGCAGAGATCGGAAGAGCGGTTTCAG    |
| chr22 | 36702410  | 36702449  | MYH9_3119  | - | GTGACCTATGCACCAGACGTTGGTGGGGTGCCCGGCGCCGCACTGTGGTGTGGTGGATCGGAAGAGCGGTTTCAG          |
| chr22 | 36705277  | 36705316  | MYH9_3120  | - | GTGACCTATGCACCAGACGTCCTCCTGCCCCCTGCCCTCTTGCTGGCTGGCTGGTCAAGATCGGAAGAGCGGTTTCAG       |
| chr22 | 36708044  | 36708083  | MYH9_3121  | - | GTGACCTATGCACCAGACGTCACAGGGGAGGTGCTGGCCAGATCTTCACAGGAGAGGTGAGATCGGAAGAGCGGTTTCAG     |
| chr22 | 36710140  | 36710179  | MYH9_3122  | - | GTGACCTATGCACCAGACGTGGCTTGCTTTGACCTCACACCTGCCTCTGGCTTTTCCCTTAGATCGGAAGAGCGGTTTCAG    |
| chr22 | 36712512  | 36712551  | MYH9_3123  | - | GTGACCTATGCACCAGACGTCCTTCCATTACCACCCCTGCTGCCCTCCTTGGCCCTGTTGGTAGATCGGAAGAGCGGTTTCAG  |
| chr22 | 36714202  | 36714241  | MYH9_3124  | - | GTGACCTATGCACCAGACGTTGGGGCCAGGGCAGCTGGCTGCCTCCTGGGTGAATGTCCAGATCGGAAGAGCGGTTTCAG     |
| chr22 | 36715535  | 36715574  | MYH9_3125  | - | GTGACCTATGCACCAGACGTGGCCCTCCTGGAATAATGGGGCAGGTTGGCTGGCCATAGATCGGAAGAGCGGTTTCAG       |
| chr22 | 36716215  | 36716254  | MYH9_3126  | - | GTGACCTATGCACCAGACGTGGCCCTCCTATGGTGTGAGTGTGGGCAGAGAAAGGCTGGTAGATCGGAAGAGCGGTTTCAG    |
| chr22 | 36716793  | 36716832  | MYH9_3127  | - | GTGACCTATGCACCAGACGTGGCCTGCAGCCTGACACCGGGGCTGCCGGCTCTGGCCCTAGATCGGAAGAGCGGTTTCAG     |
| chr22 | 36717753  | 36717792  | MYH9_3128  | - | GTGACCTATGCACCAGACGTGGTTCGTTGGGATAAGAGTCTGGATCCGGAGGGGAGGCAAGATCGGAAGAGCGGTTTCAG     |
| chr22 | 36718424  | 36718463  | MYH9_3129  | - | GTGACCTATGCACCAGACGTCGGCGCGCCCCGCTCTGGGGACAGAGGGCCTTGCCCGGAGATCGGAAGAGCGGTTTCAG      |
| chr22 | 36722563  | 36722602  | MYH9_3130  | - | GTGACCTATGCACCAGACGTCAGCCCTTGCTCCTGTGCCCGCCTGCTTGGCCCTTGGTGGAGATCGGAAGAGCGGTTTCAG    |
| chr22 | 36723456  | 36723495  | MYH9_3131  | - | GTGACCTATGCACCAGACGTCCTGCTGGGATGTGGTGTTCACCCAGCTGTTCTGAGATCGGAAGAGCGGTTTCAG          |
| chr22 | 36737365  | 36737404  | MYH9_3132  | - | GTGACCTATGCACCAGACGTTAGTGTGTCGCCACTGGGGCTGAATCTCACCTTCCAGTGGGCCAGATCGGAAGAGCGGTTTCAG |

|       |          |          |               |   |                                                                                    |
|-------|----------|----------|---------------|---|------------------------------------------------------------------------------------|
| chr22 | 36744899 | 36744938 | MYH9_3133     | - | GTGACCTATGCACCAGACGTGCCGTGGCACCCCGCAGGCTGGGTCTGAGGGCTCCGAGGTAGATCGGAAGAGCGGTTTCAG  |
| chr8  | 71025817 | 71025856 | NCOA2_3134    | - | GTGACCTATGCACCAGACGTGCCAGTTGCTTCTTCAGCTGACCGGGCTCACTTGCTCAAAGATCGGAAGAGCGGTTTCAG   |
| chr8  | 71033487 | 71033526 | NCOA2_3135    | - | GTGACCTATGCACCAGACGTACAGTGAATATATGAATATGGAAGTAAAGCAAACATGAAAGATCGGAAGAGCGGTTTCAG   |
| chr8  | 71036069 | 71036108 | NCOA2_3136    | - | GTGACCTATGCACCAGACGTAAAGGAGAAGCAACCCAGTGGCTTCATATCACGGCTTTTTTAGATCGGAAGAGCGGTTTCAG |
| chr8  | 71036873 | 71036912 | NCOA2_3137    | - | GTGACCTATGCACCAGACGTATCCTTCTCTTTTCATACCGCCACTGTGACAGCTGAAGGAGATCGGAAGAGCGGTTTCAG   |
| chr8  | 71038998 | 71039037 | NCOA2_3138    | - | GTGACCTATGCACCAGACGTAGATCCCCACCACCTTTCCACCAGTCTTTTCTCCCCAGTGGACCGGAAGAGCGGTTTCAG   |
| chr8  | 71040618 | 71040657 | NCOA2_3139    | - | GTGACCTATGCACCAGACGTATACCAGCCATTACCTTTGATGATGCACGACTGCTTAGATCGGAAGAGCGGTTTCAG      |
| chr8  | 71040887 | 71040926 | NCOA2_3140    | - | GTGACCTATGCACCAGACGTGATGGCACCTGGGAAGTCAGGGGTGCTGGGTGGAGGACAAGATCGGAAGAGCGGTTTCAG   |
| chr8  | 71044022 | 71044061 | NCOA2_3141    | - | GTGACCTATGCACCAGACGTAAAGGCAGCAGGTGGGGGCCAAGCGCTCTCATGGGCGCAGAGATCGGAAGAGCGGTTTCAG  |
| chr8  | 71050388 | 71050427 | NCOA2_3142    | - | GTGACCTATGCACCAGACGTAGCACTAGGGTAGCCAGTATTTTTATACCTGTCCAGAAAAGATCGGAAGAGCGGTTTCAG   |
| chr8  | 71053369 | 71053408 | NCOA2_3143    | - | GTGACCTATGCACCAGACGTTCTAGTGTCTTTTGTCTTTAACTTTTATGCTCTCTTAGAAAAGATCGGAAGAGCGGTTTCAG |
| chr8  | 71056827 | 71056866 | NCOA2_3144    | - | GTGACCTATGCACCAGACGTAATGCATGTTACTTTATTGGTGGTTTATTTAATTTAATAGATCGGAAGAGCGGTTTCAG    |
| chr8  | 71060458 | 71060497 | NCOA2_3145    | - | GTGACCTATGCACCAGACGTGAAATGGCTGGTGTGCAAGAAATTTCCATATAACTACTAGATCGGAAGAGCGGTTTCAG    |
| chr8  | 71068156 | 71068195 | NCOA2_3146    | - | GTGACCTATGCACCAGACGTTACATCTTCTCGCAGGTGACTAATCTGTATCCATCAAGAGATCGGAAGAGCGGTTTCAG    |
| chr8  | 71071690 | 71071729 | NCOA2_3147    | - | GTGACCTATGCACCAGACGTTTCTAAGAAGTCATTTTCCATTTCCAAGTTAAGAGGAGATAGATCGGAAGAGCGGTTTCAG  |
| chr8  | 71074896 | 71074935 | NCOA2_3148    | - | GTGACCTATGCACCAGACGTTCAAATGATTTTTCTTAAATATTGCTTCTGTGGGAGCTAGATCGGAAGAGCGGTTTCAG    |
| chr8  | 71075650 | 71075689 | NCOA2_3149    | - | GTGACCTATGCACCAGACGTTCTCCAAAGAACCAAGGAATCATTTTGAATACTTACAGATCGGAAGAGCGGTTTCAG      |
| chr8  | 71078751 | 71078790 | NCOA2_3150    | - | GTGACCTATGCACCAGACGTATCCCTAGGGTGTCTGTGTGTGTATTTATTCTGTAGATCGGAAGAGCGGTTTCAG        |
| chr8  | 71082387 | 71082426 | NCOA2_3151    | - | GTGACCTATGCACCAGACGTGCTGGGTCTCCCTCCCTACCTCCCGTCACCCCCACCTGCCAGATCGGAAGAGCGGTTTCAG  |
| chr8  | 71086941 | 71086980 | NCOA2_3152    | - | GTGACCTATGCACCAGACGTTTCACTTTTAGTGTCTATTTTAAATCTTGTGATCTTCAAGATCGGAAGAGCGGTTTCAG    |
| chr8  | 71126088 | 71126127 | NCOA2_3153    | - | GTGACCTATGCACCAGACGTTGAATTAGTATTTTGAAGAGTTGAATTGGTTTCTGTTTTAGATCGGAAGAGCGGTTTCAG   |
| chr8  | 71128845 | 71128884 | NCOA2_3154    | - | GTGACCTATGCACCAGACGTTGCTGAGAAAAGGAATCAGTATTGCTGTAAAGCCACATAGATCGGAAGAGCGGTTTCAG    |
| chr8  | 71068579 | 71068618 | NCOA2_3155    | - | GTGACCTATGCACCAGACGTTGCTGGATACAAACAAGACTCCACAGGTAGCTTGCCTGGAGATCGGAAGAGCGGTTTCAG   |
| chr8  | 71069002 | 71069041 | NCOA2_3156    | - | GTGACCTATGCACCAGACGTGCAGCAGCAAGAAATAGCCATAGTTATACCAACAGCTCAGATCGGAAGAGCGGTTTCAG    |
| chr20 | 5095879  | 5095918  | PCNA_3157     | - | GTGACCTATGCACCAGACGTAATTCAGAAAATAAAAATAAGCTCTTTGAGAAGTCTTCAGATCGGAAGAGCGGTTTCAG    |
| chr20 | 5096045  | 5096084  | PCNA_3158     | - | GTGACCTATGCACCAGACGTAATTTGAACCTTGTTTTGTAGGTAGTCATATGTGATACAAGATCGGAAGAGCGGTTTCAG   |
| chr20 | 5098066  | 5098105  | PCNA_3159     | - | GTGACCTATGCACCAGACGTTTAAAGTAAAAGAAAATAGTTTGAAGAGAATTATAATACAGATCGGAAGAGCGGTTTCAG   |
| chr20 | 5099206  | 5099245  | PCNA_3160     | - | GTGACCTATGCACCAGACGTGTTCTCTATTGTAGAGAGTGTGTACACAGGCACGATAGTAGATCGGAAGAGCGGTTTCAG   |
| chr20 | 5099365  | 5099404  | PCNA_3161     | - | GTGACCTATGCACCAGACGTCTTTTACCGAGTACGAAAGCTACAGAAAATCAAACACTCAGATCGGAAGAGCGGTTTCAG   |
| chr20 | 5100174  | 5100213  | PCNA_3162     | - | GTGACCTATGCACCAGACGTCTGGCCCCGGGAGCCGCCCCCGCCCTGCCACCTCCGAGATCGGAAGAGCGGTTTCAG      |
| chr15 | 74287104 | 74287143 | PML_3163      | - | GTGACCTATGCACCAGACGTTTAGTTTTCGATTCTCGGTTTAGATCTTGGAGTGCCTGAAGAGATCGGAAGAGCGGTTTCAG |
| chr15 | 74290295 | 74290334 | PML_3164      | - | GTGACCTATGCACCAGACGTAGAGAGGCAGGTGAGGGCTGGAGAAGTCCCAAAGCCCCAGATCGGAAGAGCGGTTTCAG    |
| chr15 | 74315119 | 74315158 | PML_3165      | - | GTGACCTATGCACCAGACGTACAAGGTTGGCCTGGGTTAGGACTCTCTGACTTTTTCTAGATCGGAAGAGCGGTTTCAG    |
| chr15 | 74317148 | 74317187 | PML_3166      | - | GTGACCTATGCACCAGACGTTCAAAGAAGTTCACAGGCAGGTCAAGGACATGCTGGTAAGGAGATCGGAAGAGCGGTTTCAG |
| chr15 | 74324863 | 74324902 | PML_3167      | - | GTGACCTATGCACCAGACGTGGGAAAATAGTGTAGCAAAATGACTAGGCAGCAGCCAGGATCGGAAGAGCGGTTTCAG     |
| chr15 | 74325447 | 74325486 | PML_3168      | - | GTGACCTATGCACCAGACGTGGAGTCAACAGGCCAGGTGAGGTGCCTGCAGGGGTGAGTGAAGATCGGAAGAGCGGTTTCAG |
| chr15 | 74326769 | 74326808 | PML_3169      | - | GTGACCTATGCACCAGACGTGAAGGGGAGATGCATTATGAATGCCTAGGATGCATGCTGAGATCGGAAGAGCGGTTTCAG   |
| chr15 | 74328298 | 74328337 | PML_3170      | - | GTGACCTATGCACCAGACGTGGGCAGGGGTGTTGGCTGCAAGGTTACAAGAGAAGGGTAGAGATCGGAAGAGCGGTTTCAG  |
| chr15 | 74335280 | 74335319 | PML_3171      | - | GTGACCTATGCACCAGACGTGAAAAACCAAGCGTCAGGGATTGAGAGGGCCAAAGCAGATCGGAAGAGCGGTTTCAG      |
| chr15 | 74336512 | 74336551 | PML_3172      | - | GTGACCTATGCACCAGACGTGAGAAGGGCAGGGTGAGGACCCAGGTCACAGAGAGCTTAGATCGGAAGAGCGGTTTCAG    |
| chr15 | 74315409 | 74315448 | PML_3173      | - | GTGACCTATGCACCAGACGTCTCCTGAGCCCGCACGTGACCTACCACCTGGCGCACGCGCAGATCGGAAGAGCGGTTTCAG  |
| chr15 | 74327853 | 74327892 | PML_3174      | - | GTGACCTATGCACCAGACGTGCAGGAGTGTGGCTTGGACCACATGGGGAGACCAAGTCCAGATCGGAAGAGCGGTTTCAG   |
| chr15 | 74336906 | 74336945 | PML_3175      | - | GTGACCTATGCACCAGACGTCCAGCACGGCAGCCATGGCGCTGCGCTCGCTCATGTTTCTAGATCGGAAGAGCGGTTTCAG  |
| chr3  | 12393042 | 12393081 | PPARG_3176    | - | GTGACCTATGCACCAGACGTAATAGGGGTTTGTCTGTAATTCACACTGATATTTTGTCTTAGATCGGAAGAGCGGTTTCAG  |
| chr3  | 12421153 | 12421192 | PPARG_3177    | - | GTGACCTATGCACCAGACGTAATAGACTAGCTGTGAAGTTAAGTCTAGAGAACACAGCAGATCGGAAGAGCGGTTTCAG    |
| chr3  | 12421155 | 12421194 | PPARG_3178    | - | GTGACCTATGCACCAGACGTAAAATAGACTAGCTGTGAAGTTAAGTCTAGAGAACACAGCAGATCGGAAGAGCGGTTTCAG  |
| chr3  | 12422771 | 12422810 | PPARG_3179    | - | GTGACCTATGCACCAGACGTAGACATGTGAGAGGATAATTATCCCATGAAAACAGTCTTAAGATCGGAAGAGCGGTTTCAG  |
| chr3  | 12447331 | 12447370 | PPARG_3180    | - | GTGACCTATGCACCAGACGTAGAGGAATGACAGGATGAATCATTGGATTACTACTGCTCTAGATCGGAAGAGCGGTTTCAG  |
| chr3  | 12458153 | 12458192 | PPARG_3181    | - | GTGACCTATGCACCAGACGTAAACAGGGAAAACGTGGATGACTTGGAGATTTTAACTCACAGATCGGAAGAGCGGTTTCAG  |
| chr3  | 12475347 | 12475386 | PPARG_3182    | - | GTGACCTATGCACCAGACGTACATATGAAAACACAAACAGGGGGTTTCAGTCAAAAAATCCAGATCGGAAGAGCGGTTTCAG |
| chr4  | 23797395 | 23797434 | PPARGC1A_3183 | - | GTGACCTATGCACCAGACGTAGCTGAGGATGACAGAGGGATGGCGAATACCTCATGGGACAGATCGGAAGAGCGGTTTCAG  |
| chr4  | 23803303 | 23803342 | PPARGC1A_3184 | - | GTGACCTATGCACCAGACGTTATTGTACTGTGAAATGAGGAATCCATAATGTAGAGCTCAAAGATCGGAAGAGCGGTTTCAG |
| chr4  | 23803797 | 23803836 | PPARGC1A_3185 | - | GTGACCTATGCACCAGACGTTCAAAGTATTTTCTGTTTGAAGTGCAGTATGTA AAAAAGATCGGAAGAGCGGTTTCAG    |
| chr4  | 23814320 | 23814359 | PPARGC1A_3186 | - | GTGACCTATGCACCAGACGTTGGAGCTCACTTTTATTTTAAAGTAGGGTTTCTTCTTTTATAGATCGGAAGAGCGGTTTCAG |
| chr4  | 23814594 | 23814633 | PPARGC1A_3187 | - | GTGACCTATGCACCAGACGTATGTCTTTTCTTTAGCTCCCTTTATCCCTCTTGTAGAAGATCGGAAGAGCGGTTTCAG     |
| chr4  | 23826036 | 23826075 | PPARGC1A_3188 | - | GTGACCTATGCACCAGACGTAGA AATGAACATTTTCTGAAAGGGAAGGGGGTCTAATAGATCGGAAGAGCGGTTTCAG    |
| chr4  | 23829973 | 23830012 | PPARGC1A_3189 | - | GTGACCTATGCACCAGACGTGACCAAACAGCTGGTGTGAGGGCACTGGAAGCAAAGAAGATCGGAAGAGCGGTTTCAG     |
| chr4  | 23831036 | 23831075 | PPARGC1A_3190 | - | GTGACCTATGCACCAGACGTA AATTTTTTAAATCAGTGGGGGATGTACCAAAGATTTTGTAGATCGGAAGAGCGGTTTCAG |

|       |          |          |               |   |                                                                                      |
|-------|----------|----------|---------------|---|--------------------------------------------------------------------------------------|
| chr4  | 23833130 | 23833169 | PPARGC1A_3191 | - | GTGACCTATGCACCAGACGTTTCCCTACTGTTTAGCAGGAATTGGAGTTGCCCTGGCTACAGATCGGAAGAGCGGTTTCAG    |
| chr4  | 23886325 | 23886364 | PPARGC1A_3192 | - | GTGACCTATGCACCAGACGTCCTTTGAAACATTAATTTTTTCATTGAGTTTGGCTTGGCAGATCGGAAGAGCGGTTTCAG     |
| chr4  | 23891477 | 23891516 | PPARGC1A_3193 | - | GTGACCTATGCACCAGACGTGCAGGGCTCGGCGCTGCAGCCAACTGACGCTTCCCTCAAGATCGGAAGAGCGGTTTCAG      |
| chr4  | 23815721 | 23815760 | PPARGC1A_3194 | - | GTGACCTATGCACCAGACGTCAAGAAAACAGCTCCAAGACCAGGAATCCGAGCCGAGCTAGATCGGAAGAGCGGTTTCAG     |
| chr17 | 38487421 | 38487460 | RARA_3195     | - | GTGACCTATGCACCAGACGTACAGTCAAGGGGAGGCAGACAGTCTGGCAGGGGGCTCTAGATCGGAAGAGCGGTTTCAG      |
| chr17 | 38498907 | 38498946 | RARA_3196     | - | GTGACCTATGCACCAGACGTGAAGGCAAGAGGTCCGAGTGGGAAGTCTGCGCGCCGCCAGATCGGAAGAGCGGTTTCAG      |
| chr17 | 38504518 | 38504557 | RARA_3197     | - | GTGACCTATGCACCAGACGTAAAGAGGGGAGGGCAGTTAGAGCACTAGGTCGCCATCCTTAGATCGGAAGAGCGGTTTCAG    |
| chr17 | 38505986 | 38506025 | RARA_3198     | - | GTGACCTATGCACCAGACGTAGGGGAGGGAGTCAAGTTGTCCACACCCACAGTGGGAGCAAGATCGGAAGAGCGGTTTCAG    |
| chr17 | 38508112 | 38508151 | RARA_3199     | - | GTGACCTATGCACCAGACGTCAAGGGGGTTAAGAGGGCAGCTGCAGGCTGCTCAGGGCCAGATCGGAAGAGCGGTTTCAG     |
| chr17 | 38508533 | 38508572 | RARA_3200     | - | GTGACCTATGCACCAGACGTAGGGAGAGTGAAGGCTTCTTCTCCATGGCACCCCTTCTCAGATCGGAAGAGCGGTTTCAG     |
| chr17 | 38510504 | 38510543 | RARA_3201     | - | GTGACCTATGCACCAGACGTAGGATGCTTGGGTTTCAAGGGACTGGAACCCGAACCCACTCTGAGATCGGAAGAGCGGTTTCAG |
| chr17 | 38511465 | 38511504 | RARA_3202     | - | GTGACCTATGCACCAGACGTAGAACCACCCCTGAGCAGCTGGGAACACAGCTGCACCCAGATCGGAAGAGCGGTTTCAG      |
| chr17 | 38512211 | 38512250 | RARA_3203     | - | GTGACCTATGCACCAGACGTGGAGGGGGCAGGTCAGCACGCTGGGCCAGCCCTCCACAGATCGGAAGAGCGGTTTCAG       |
| chr5  | 36152315 | 36152354 | SKP2_3204     | - | GTGACCTATGCACCAGACGTGGCCCGGGAGTTAAATACGTGCATTAACCTGACAGAGCTGAGATCGGAAGAGCGGTTTCAG    |
| chr5  | 36152823 | 36152862 | SKP2_3205     | - | GTGACCTATGCACCAGACGTGCACATAACCCCGGTTCTTTTGGAAAACACACCCATAAAAGATCGGAAGAGCGGTTTCAG     |
| chr5  | 36163697 | 36163736 | SKP2_3206     | - | GTGACCTATGCACCAGACGTAAAACAAGTGTGGTCCATCACCATTCTTTCACCCATCAAAGATCGGAAGAGCGGTTTCAG     |
| chr5  | 36166571 | 36166610 | SKP2_3207     | - | GTGACCTATGCACCAGACGTGGAGATACTTAATTTGGCCAGTCGGTCCACACTAAATGCTGAGATCGGAAGAGCGGTTTCAG   |
| chr5  | 36168365 | 36168404 | SKP2_3208     | - | GTGACCTATGCACCAGACGTGAGAAAAAGAGTCCATAGTGGCTCTCACGGGTACAAAGATCGGAAGAGCGGTTTCAG        |
| chr5  | 36170396 | 36170435 | SKP2_3209     | - | GTGACCTATGCACCAGACGTAGAAAAACGTCAAGAAAAAGACCAGTAAGACACTATTAGATCGGAAGAGCGGTTTCAG       |
| chr5  | 36171655 | 36171694 | SKP2_3210     | - | GTGACCTATGCACCAGACGTGAGGGGTAAATAACAAAATATGAAACCATCACACGGGAATAGATCGGAAGAGCGGTTTCAG    |
| chr5  | 36177237 | 36177276 | SKP2_3211     | - | GTGACCTATGCACCAGACGTGGCAGAAGAAAAGATATTGAAAATCACACATTGATCCTAGAGATCGGAAGAGCGGTTTCAG    |
| chr5  | 36181870 | 36181909 | SKP2_3212     | - | GTGACCTATGCACCAGACGTAGAAAAAGACTTTCAGAATAGCAGTATCTATGGAACCTGATAGATCGGAAGAGCGGTTTCAG   |
| chr5  | 36183892 | 36183931 | SKP2_3213     | - | GTGACCTATGCACCAGACGTAAATTTCAAGTAGTATTAGCATTTTTAATCTATTAAAGAAAGATCGGAAGAGCGGTTTCAG    |
| chr16 | 11348650 | 11348689 | SOCS1_3214    | - | GTGACCTATGCACCAGACGTGCCCGGTGCAGCAGCATTAACCTGGATGCCGTGTTATTTAGATCGGAAGAGCGGTTTCAG     |
| chr16 | 11348968 | 11349007 | SOCS1_3215    | - | GTGACCTATGCACCAGACGTACTGCTTTTTCGCCCTTAGCGTGAAGATGGCCTCGGGACCAGATCGGAAGAGCGGTTTCAG    |
| chr2  | 39212915 | 39212954 | SOS1_3216     | - | GTGACCTATGCACCAGACGTACTGGGATGTATTTTTCTAGCCCAAATCCATTGCTGGAGATCGGAAGAGCGGTTTCAG       |
| chr2  | 39214564 | 39214603 | SOS1_3217     | - | GTGACCTATGCACCAGACGTAAATCTTGTGTGAGAAATGGAATCATTACAGTTTATTAGATCGGAAGAGCGGTTTCAG       |
| chr2  | 39216361 | 39216400 | SOS1_3218     | - | GTGACCTATGCACCAGACGTGGTGGTTAAGACTCATAATTTCTGCTTTGGCTTTAAAAATAGATCGGAAGAGCGGTTTCAG    |
| chr2  | 39222214 | 39222253 | SOS1_3219     | - | GTGACCTATGCACCAGACGTAAATTTAAGTGCATTAAGTATTGTTAGTACTATACATAGATCGGAAGAGCGGTTTCAG       |
| chr2  | 39224013 | 39224052 | SOS1_3220     | - | GTGACCTATGCACCAGACGTGTATATTTGCTGGTATGATCTACTACCATATGTGTTAAGATCGGAAGAGCGGTTTCAG       |
| chr2  | 39224344 | 39224383 | SOS1_3221     | - | GTGACCTATGCACCAGACGTATTTAAAGATTCACTCTTGATTAAGTTTCTAAACTAAGATCGGAAGAGCGGTTTCAG        |
| chr2  | 39233503 | 39233542 | SOS1_3222     | - | GTGACCTATGCACCAGACGTCTTCTGAATTTTTATTGCATTTCTGGATAAAACAAAACAGATCGGAAGAGCGGTTTCAG      |
| chr2  | 39237675 | 39237714 | SOS1_3223     | - | GTGACCTATGCACCAGACGTCTAGCATTTCTATATTTATAGCTGCAGCTATGTTATGAAGATCGGAAGAGCGGTTTCAG      |
| chr2  | 39239217 | 39239256 | SOS1_3224     | - | GTGACCTATGCACCAGACGTAAACATTCAAGTTGAAAAGCTATTTCAAAGAGTTAACTTAGATCGGAAGAGCGGTTTCAG     |
| chr2  | 39240551 | 39240590 | SOS1_3225     | - | GTGACCTATGCACCAGACGTATTTTTAGTGGCTGCTATTTTTATATGTAATAAAAGTACCAAAGATCGGAAGAGCGGTTTCAG  |
| chr2  | 39240958 | 39240997 | SOS1_3226     | - | GTGACCTATGCACCAGACGTAAATAATGAAGTAAATAAGTCTTTATCAAACCTTTCGTTTCAGATCGGAAGAGCGGTTTCAG   |
| chr2  | 39249661 | 39249700 | SOS1_3227     | - | GTGACCTATGCACCAGACGTTGCAGTTGCCCTGTCACCTTTGTTTTCTGCTTCAAACCTGAAGATCGGAAGAGCGGTTTCAG   |
| chr2  | 39251101 | 39251140 | SOS1_3228     | - | GTGACCTATGCACCAGACGTTTACTTTTTAAAAATATCCTTTTTTCCCTGAATATTGGTAGATCGGAAGAGCGGTTTCAG     |
| chr2  | 39262303 | 39262342 | SOS1_3229     | - | GTGACCTATGCACCAGACGTTCTTTATTGTTATTTGTAACATATTCAAGTGTGAATTTTTAGATCGGAAGAGCGGTTTCAG    |
| chr2  | 39262481 | 39262520 | SOS1_3230     | - | GTGACCTATGCACCAGACGTTTTAAATGAAGATGACAATGCTGAAAAGTAAACTTAAAGATCGGAAGAGCGGTTTCAG       |
| chr2  | 39278235 | 39278274 | SOS1_3231     | - | GTGACCTATGCACCAGACGTGAATATATACCCGAAAAAGTCTGCATAAAAGCCTACATTTAGATCGGAAGAGCGGTTTCAG    |
| chr2  | 39281705 | 39281744 | SOS1_3232     | - | GTGACCTATGCACCAGACGTTTGTATATATGCCTCTCATTGAATGTGTTGTGAAATTTGCAGATCGGAAGAGCGGTTTCAG    |
| chr2  | 39283793 | 39283832 | SOS1_3233     | - | GTGACCTATGCACCAGACGTGAGCTTTTTCTATTTTTTCTTAAAGTTTCTTTTTATGACTTAGATCGGAAGAGCGGTTTCAG   |
| chr2  | 39285764 | 39285803 | SOS1_3234     | - | GTGACCTATGCACCAGACGTACTACTGCCTTCTGCTTTTTAAGGGAAAAATAAAACCCAAAGATCGGAAGAGCGGTTTCAG    |
| chr2  | 39294719 | 39294758 | SOS1_3235     | - | GTGACCTATGCACCAGACGTTGTGCTTGTATTTACTTTATATCTAATTTGTGTTGGAGATCGGAAGAGCGGTTTCAG        |
| chr2  | 39347427 | 39347466 | SOS1_3236     | - | GTGACCTATGCACCAGACGTGCGGGACCCCGCTCCGCGCCGACGCCCCAGCGGAGATCGGAAGAGCGGTTTCAG           |
| chr2  | 39249989 | 39250028 | SOS1_3237     | - | GTGACCTATGCACCAGACGTTTGAAATAATTTAAAAGATGAAAATAGTGTATATTTTCAGATCGGAAGAGCGGTTTCAG      |
| chr20 | 36012507 | 36012546 | SRC_3238      | - | GTGACCTATGCACCAGACGTGGAGAGAGAGAAGACACTGGAACAGGCAGGGCTGCCGGGGAGATCGGAAGAGCGGTTTCAG    |
| chr20 | 36014428 | 36014467 | SRC_3239      | - | GTGACCTATGCACCAGACGTGGGTGGGGTGTGTGAGAACAGTGGGGCCACAGCCAGGGAAGATCGGAAGAGCGGTTTCAG     |
| chr20 | 36022248 | 36022287 | SRC_3240      | - | GTGACCTATGCACCAGACGTACAGAAGGAGGGAGGAAAGGAGAAGGGAGCCGTCAGCCACAGATCGGAAGAGCGGTTTCAG    |
| chr20 | 36022527 | 36022566 | SRC_3241      | - | GTGACCTATGCACCAGACGTGAGGACGGAGGATGGTGTGCTGACTGTCCAGGCTTCTGCCAAGATCGGAAGAGCGGTTTCAG   |
| chr20 | 36024515 | 36024554 | SRC_3242      | - | GTGACCTATGCACCAGACGTCCGAGGGGAGCCGTCCAGGCCATTGCCCTCTCCCCCTCCAGAGATCGGAAGAGCGGTTTCAG   |
| chr20 | 36026052 | 36026091 | SRC_3243      | - | GTGACCTATGCACCAGACGTGGCAGGAGGAGCAGTTAGGCGGGTCTTCTGCCCTGGGGCCAGATCGGAAGAGCGGTTTCAG    |
| chr20 | 36028468 | 36028507 | SRC_3244      | - | GTGACCTATGCACCAGACGTGGGATGCAGGCTGACTCAGTGGAGCCCCCAACTCCTACCAGATCGGAAGAGCGGTTTCAG     |
| chr20 | 36029955 | 36029994 | SRC_3245      | - | GTGACCTATGCACCAGACGTAGAGACCCAGCTCCAGCTCCTGCCCTGTCCCTCTGCCAGGAGATCGGAAGAGCGGTTTCAG    |
| chr20 | 36030788 | 36030827 | SRC_3246      | - | GTGACCTATGCACCAGACGTAACCGTGGGAGCCTGGCTCAGGTGCCACCCATGCCCTCCAGATCGGAAGAGCGGTTTCAG     |
| chr20 | 36031524 | 36031563 | SRC_3247      | - | GTGACCTATGCACCAGACGTAGCGAGCTGGGAGCCCGGCTCCGCTGAGGAAAGTGGGAGATCGGAAGAGCGGTTTCAG       |
| chr9  | 27109539 | 27109578 | TEK_3248      | - | GTGACCTATGCACCAGACGTACTCTCCATCCAGTTTCCACAAATGTGCATGAGTCCCAAGATCGGAAGAGCGGTTTCAG      |



|       |           |           |            |   |                                                                                      |
|-------|-----------|-----------|------------|---|--------------------------------------------------------------------------------------|
| chr9  | 27157779  | 27157818  | TEK_3249   | - | GTGACCTATGCACCAGACGTAGAGAGACAATAATGTATGACTAAGGTTATTAACATGACCAGATCGGAAGAGCGGTTTCAG    |
| chr9  | 27168443  | 27168482  | TEK_3250   | - | GTGACCTATGCACCAGACGTAGAGAAAACAAATACCAAAAATGGGATCACACATTTTCTCAGATCGGAAGAGCGGTTTCAG    |
| chr9  | 27169425  | 27169464  | TEK_3251   | - | GTGACCTATGCACCAGACGTGGAAGAGTGAAGAACCGTAGGTCACACTGAAACATACCTGAGATCGGAAGAGCGGTTTCAG    |
| chr9  | 27173170  | 27173209  | TEK_3252   | - | GTGACCTATGCACCAGACGTAAAAGAAAAGATGATTCAGAGTCAAATATGCAACCCCTTGAGATCGGAAGAGCGGTTTCAG    |
| chr9  | 27180188  | 27180227  | TEK_3253   | - | GTGACCTATGCACCAGACGTAGACATCAAAAAACAGTATTAATCCAGGGGAAGAGAGGAAGATCGGAAGAGCGGTTTCAG     |
| chr9  | 27183407  | 27183446  | TEK_3254   | - | GTGACCTATGCACCAGACGTAAAACAGCACTGTAAATCTAATATTTAACAGAGCCAGCAAGATCGGAAGAGCGGTTTCAG     |
| chr9  | 27185433  | 27185472  | TEK_3255   | - | GTGACCTATGCACCAGACGTCAAATCAAAAAATAAAAACTTCAGGGAGGCATAAAACAGATCGGAAGAGCGGTTTCAG       |
| chr9  | 27190477  | 27190516  | TEK_3256   | - | GTGACCTATGCACCAGACGTTCAGAAAGGCAGATTAGTCCCTTCGGCTTTGAGGTTTTGTAGATCGGAAGAGCGGTTTCAG    |
| chr9  | 27192437  | 27192476  | TEK_3257   | - | GTGACCTATGCACCAGACGTAAAACGTCCAGGAACTTAAGTTGGCATTCTCTTACATTAGATCGGAAGAGCGGTTTCAG      |
| chr9  | 27202768  | 27202807  | TEK_3258   | - | GTGACCTATGCACCAGACGTAAAAGAAAAAAGATTCACTTAAGATATACTACCATGGCCTAGATCGGAAGAGCGGTTTCAG    |
| chr9  | 27204859  | 27204898  | TEK_3259   | - | GTGACCTATGCACCAGACGTAGACAGAGGTTGAAGCAGGTGATCTTTAGTTTACATAGAGAAAAGATCGGAAGAGCGGTTTCAG |
| chr9  | 27206530  | 27206569  | TEK_3260   | - | GTGACCTATGCACCAGACGTAAATATTTTCATCATTTTGTGTCAGGATTTTTCATAATTCTAGATCGGAAGAGCGGTTTCAG   |
| chr9  | 27209069  | 27209108  | TEK_3261   | - | GTGACCTATGCACCAGACGTAGTCAAGGGTTGTGATTCCTTTGTTTACACCTTTTCAGAAAGTCGGAAGAGCGGTTTCAG     |
| chr9  | 27212655  | 27212694  | TEK_3262   | - | GTGACCTATGCACCAGACGTGGAAGAGAGCATCGACTCATCAGTGGCCCTGAACAGCTATAGATCGGAAGAGCGGTTTCAG    |
| chr9  | 27213432  | 27213471  | TEK_3263   | - | GTGACCTATGCACCAGACGTTGAAAACATTATGTATTTTCAGCCTAATGAAAGCCCCAGGAGATCGGAAGAGCGGTTTCAG    |
| chr9  | 27217636  | 27217675  | TEK_3264   | - | GTGACCTATGCACCAGACGTCAAAGTGAGATTTCACTTAACCTGGGACAGGGTCTTTAAGAAGATCGGAAGAGCGGTTTCAG   |
| chr9  | 27218725  | 27218764  | TEK_3265   | - | GTGACCTATGCACCAGACGTGACAAGTGTAAACCAACAATCAGCAACAGAGTCAACCCAGATCGGAAGAGCGGTTTCAG      |
| chr9  | 27219997  | 27220036  | TEK_3266   | - | GTGACCTATGCACCAGACGTAAACAGTGCCACTTAAGTCCCTCTGCGCATGAAAAGCAATAGATCGGAAGAGCGGTTTCAG    |
| chr9  | 27228154  | 27228193  | TEK_3267   | - | GTGACCTATGCACCAGACGTAAAAGAATTAAGGGTTAATTCTATAACTGTGCTTCAGTCCAGATCGGAAGAGCGGTTTCAG    |
| chr9  | 27229106  | 27229145  | TEK_3268   | - | GTGACCTATGCACCAGACGTGAAAATGGTTCAGAGACATAGGCTGCTTTGATTCCACCTCAGATCGGAAGAGCGGTTTCAG    |
| chr17 | 38545721  | 38545760  | TOP2A_3269 | - | GTGACCTATGCACCAGACGTGATTATTTAAGTAATATCTTACCAGCCCAAGACTGGTAGATCGGAAGAGCGGTTTCAG       |
| chr17 | 38546167  | 38546206  | TOP2A_3270 | - | GTGACCTATGCACCAGACGTATCCTAGTCACTCTTTGCTGTAGATGTTCTGAAACACGAGATCGGAAGAGCGGTTTCAG      |
| chr17 | 38547708  | 38547747  | TOP2A_3271 | - | GTGACCTATGCACCAGACGTATCTTTGAGATGGTGAATGTTGCAATACCTAAGTGGTTAGATCGGAAGAGCGGTTTCAG      |
| chr17 | 38548270  | 38548309  | TOP2A_3272 | - | GTGACCTATGCACCAGACGTAAAGTAGTAGACTGTCCTTACTGGACACTCAAGATCGGAAGAGCGGTTTCAG             |
| chr17 | 38548420  | 38548459  | TOP2A_3273 | - | GTGACCTATGCACCAGACGTATCTAATATGGGTTTTGTCATGATTGTTCTAATATATTAGATCGGAAGAGCGGTTTCAG      |
| chr17 | 38548787  | 38548826  | TOP2A_3274 | - | GTGACCTATGCACCAGACGTCTAAAGAACATTATAGATAAACTGTAAGAGTGGAAATGGCCAGATCGGAAGAGCGGTTTCAG   |
| chr17 | 38551651  | 38551690  | TOP2A_3275 | - | GTGACCTATGCACCAGACGTATTTTGAAGAAAATGGTATAAAGTGAAGATTAATTTGTGTAGATCGGAAGAGCGGTTTCAG    |
| chr17 | 38554760  | 38554799  | TOP2A_3276 | - | GTGACCTATGCACCAGACGTATAATGCCCTGTAGAATTTTATTAATGAAATAATAGATCGGAAGAGCGGTTTCAG          |
| chr17 | 38554975  | 38555014  | TOP2A_3277 | - | GTGACCTATGCACCAGACGTAGTAGGATGACACTGCTTAGTCTTTGTTCTATTCTAAAGATCGGAAGAGCGGTTTCAG       |
| chr17 | 38555242  | 38555281  | TOP2A_3278 | - | GTGACCTATGCACCAGACGTGTGGCACTTTTCTATATTGTTAAAGACTGATTTGTACAAAGATCGGAAGAGCGGTTTCAG     |
| chr17 | 38556074  | 38556113  | TOP2A_3279 | - | GTGACCTATGCACCAGACGTGGAATAATAACTGCTTACTAAAACCTAGTTACGCCAAACAGATCGGAAGAGCGGTTTCAG     |
| chr17 | 38556411  | 38556450  | TOP2A_3280 | - | GTGACCTATGCACCAGACGTGTTTTGTAGATGTACAGTTCATTTATATTAAGATAGATCGGAAGAGCGGTTTCAG          |
| chr17 | 38556731  | 38556770  | TOP2A_3281 | - | GTGACCTATGCACCAGACGTATGGATTTCTTTTTAGGTTTTGTGATCAAAAAGAAATACCTAGATCGGAAGAGCGGTTTCAG   |
| chr17 | 38557052  | 38557091  | TOP2A_3282 | - | GTGACCTATGCACCAGACGTGTGTGTGTTAAGAGCCTTAACTTTTCCCTGGGTTTTGATAGATCGGAAGAGCGGTTTCAG     |
| chr17 | 38559108  | 38559147  | TOP2A_3283 | - | GTGACCTATGCACCAGACGTTCCTAAGTACCATTGATGACTTCCATTTCCAGTTTTGAAAACAGATCGGAAGAGCGGTTTCAG  |
| chr17 | 38560354  | 38560393  | TOP2A_3284 | - | GTGACCTATGCACCAGACGTAAATCCATGTTCCAGAAAGCATTATATCAGAAATCCCTGCAGATCGGAAGAGCGGTTTCAG    |
| chr17 | 38560579  | 38560618  | TOP2A_3285 | - | GTGACCTATGCACCAGACGTATTTGTTAGTCTGTTTTTCATTGTAAGATGGAATCAAATAGATCGGAAGAGCGGTTTCAG     |
| chr17 | 38560993  | 38561032  | TOP2A_3286 | - | GTGACCTATGCACCAGACGTAAATATATGCCACAAAATGGATTTGTTAGACTGACCTTTTATAGATCGGAAGAGCGGTTTCAG  |
| chr17 | 38562586  | 38562625  | TOP2A_3287 | - | GTGACCTATGCACCAGACGTGTTGATTTTTATATACATTCTAATTTTAGAAATCACTACTAGATCGGAAGAGCGGTTTCAG    |
| chr17 | 38562786  | 38562825  | TOP2A_3288 | - | GTGACCTATGCACCAGACGTAAACCCATATAGAACTTCTCATTTTATATACACCCTGTAAGATCGGAAGAGCGGTTTCAG     |
| chr17 | 38563034  | 38563073  | TOP2A_3289 | - | GTGACCTATGCACCAGACGTTCCTAAGTACCATTGATGATTTTAAAGCCCTACTCCTCAGATCGGAAGAGCGGTTTCAG      |
| chr17 | 38563751  | 38563790  | TOP2A_3290 | - | GTGACCTATGCACCAGACGTTTATTAATTTTTAGATTGTTCAACTAAATTAAGCATGTCAGATCGGAAGAGCGGTTTCAG     |
| chr17 | 38564169  | 38564208  | TOP2A_3291 | - | GTGACCTATGCACCAGACGTAGACGATTTTCAAGATCAAATCTAATTTATAATACAAGAAGATCGGAAGAGCGGTTTCAG     |
| chr17 | 38564694  | 38564733  | TOP2A_3292 | - | GTGACCTATGCACCAGACGTAAATATGTTTTCCAACTTTTAAAGTCTTATAGTTGTTATTTAGATCGGAAGAGCGGTTTCAG   |
| chr17 | 38567311  | 38567350  | TOP2A_3293 | - | GTGACCTATGCACCAGACGTAGAGGAAAATAAAAAATGAAACACCTGACTTTATTTTCCAAGATCGGAAGAGCGGTTTCAG    |
| chr17 | 38567556  | 38567595  | TOP2A_3294 | - | GTGACCTATGCACCAGACGTTCAGAGTTTTCTTTTCTGAAAGTCAAGGAAGAAGAGAAAGATCGGAAGAGCGGTTTCAG      |
| chr17 | 38567847  | 38567886  | TOP2A_3295 | - | GTGACCTATGCACCAGACGTCTTAAATTTAATCATGATTTATCTTTACATATATGTAGATCGGAAGAGCGGTTTCAG        |
| chr17 | 38568961  | 38569000  | TOP2A_3296 | - | GTGACCTATGCACCAGACGTTCTGGATGTTAAGGATAATAAGGGATTTTGAATCATTGAGATCGGAAGAGCGGTTTCAG      |
| chr17 | 38569397  | 38569436  | TOP2A_3297 | - | GTGACCTATGCACCAGACGTAAAGTGTCTTTGATCTTAATGATAAATGGTAGTAGTATAGCAGATCGGAAGAGCGGTTTCAG   |
| chr17 | 38572207  | 38572246  | TOP2A_3298 | - | GTGACCTATGCACCAGACGTGCTTAGTTTTGTTATGTAGCTGCTTGTCTATTGTTAGCTAGATCGGAAGAGCGGTTTCAG     |
| chr17 | 38572624  | 38572663  | TOP2A_3299 | - | GTGACCTATGCACCAGACGTCTTTAATATAAAGATCTGGTCAAATCTTTCATAAGAAGTAGATCGGAAGAGCGGTTTCAG     |
| chr17 | 38572942  | 38572981  | TOP2A_3300 | - | GTGACCTATGCACCAGACGTGCTCAAGTAAAGGCAGTTAACTTAGTAGTTGAAATGGATAGATCGGAAGAGCGGTTTCAG     |
| chr17 | 38573973  | 38574012  | TOP2A_3301 | - | GTGACCTATGCACCAGACGTGCGGGGGGACTGGCGGTGGAGCCTCCGCGCGGCCCGGGCAAGATCGGAAGAGCGGTTTCAG    |
| chr1  | 154130065 | 154130104 | TPM3_3302  | - | GTGACCTATGCACCAGACGTTCCACCCTGCTGCTGCTCCTCCCTCGACCAGACTCCGAGATCGGAAGAGCGGTTTCAG       |
| chr1  | 154131395 | 154131434 | TPM3_3303  | - | GTGACCTATGCACCAGACGTTCAATGATGCCATTAAACTGAGCTTACTGCTCACACCACAGATCGGAAGAGCGGTTTCAG     |
| chr1  | 154140363 | 154140402 | TPM3_3304  | - | GTGACCTATGCACCAGACGTTTCTGCTGTTCTGGATCGCCCTTTACTCTCGGGGAGATCGGAAGAGCGGTTTCAG          |
| chr1  | 154141731 | 154141770 | TPM3_3305  | - | GTGACCTATGCACCAGACGTGACAGTAGAGTGGGGCTGGGATCTTGGCTTTGGTGGATAGATCGGAAGAGCGGTTTCAG      |
| chr1  | 154142826 | 154142865 | TPM3_3306  | - | GTGACCTATGCACCAGACGTGGAGTAGGGATTGAAATAGAGAAATAGAGGAAGACTGAGATCGGAAGAGCGGTTTCAG       |

|       |           |           |            |   |                                                                                          |
|-------|-----------|-----------|------------|---|------------------------------------------------------------------------------------------|
| chr1  | 154143075 | 154143114 | TPM3_3307  | - | GTGACCTATGCACCAGACGTGGGATTTATAGGGCAGAACCACAAACATTTAGAGGTATATAGATCGGAAGAGCGGTTTCAG        |
| chr1  | 154143839 | 154143878 | TPM3_3308  | - | GTGACCTATGCACCAGACGTGTTTTGTGAAAGTGACAGGCTTTGGGGCCTGGGCCAGCCAGATCGGAAGAGCGGTTTCAG         |
| chr1  | 154145334 | 154145373 | TPM3_3309  | - | GTGACCTATGCACCAGACGTAGCTCCCCAAATCTGTGATTACCAATTTATCCCTTCCCCAGATCGGAAGAGCGGTTTCAG         |
| chr1  | 154145510 | 154145549 | TPM3_3310  | - | GTGACCTATGCACCAGACGTTTCTGTAGTCCCTCTCGTATCGGCCTTTTACAAAGCATAAGATCGGAAGAGCGGTTTCAG         |
| chr1  | 154148541 | 154148580 | TPM3_3311  | - | GTGACCTATGCACCAGACGTAAGCCTGATGGAGTGTGGATTTTAAAAAGTTATAATAGTTAGATCGGAAGAGCGGTTTCAG        |
| chr1  | 154155414 | 154155453 | TPM3_3312  | - | GTGACCTATGCACCAGACGTGGTGGAGGCTCATGAGGGAGGGGCAAGCGGCTGGAGTATCCGAGATCGGAAGAGCGGTTTCAG      |
| chr1  | 154163612 | 154163651 | TPM3_3313  | - | GTGACCTATGCACCAGACGTGAGAGATGGAGTGGTAACTACACATATAGATCTTAGATCGGAAGAGCGGTTTCAG              |
| chr1  | 154164328 | 154164367 | TPM3_3314  | - | GTGACCTATGCACCAGACGTGCATTGATCTCTCATCTGCTAGTGAACAAAGACTGTGAAAGATCGGAAGAGCGGTTTCAG         |
| chr9  | 107546546 | 107546585 | ABCA1_3315 | - | GTGACCTATGCACCAGACGTTCCATACGGGGTGGCTGAAAGTAAAGAGGAACTAGACTTTTCAGATCGGAAGAGCGGTTTCAG      |
| chr9  | 107547627 | 107547666 | ABCA1_3316 | - | GTGACCTATGCACCAGACGTAGTGTCAAACAGATTTACTTCTCAGGGTGTGGATTCTGAGATCGGAAGAGCGGTTTCAG          |
| chr9  | 107548529 | 107548568 | ABCA1_3317 | - | GTGACCTATGCACCAGACGTTAATTTCTTTGGGATAGTCCCTAGTGAGAAGGCTTGATATAGATCGGAAGAGCGGTTTCAG        |
| chr9  | 107549104 | 107549143 | ABCA1_3318 | - | GTGACCTATGCACCAGACGTAAGTCTTTGGGTTCCCTACTGTGGGATGTTTTAACTTTTCCAAGATCGGAAGAGCGGTTTCAG      |
| chr9  | 107550151 | 107550190 | ABCA1_3319 | - | GTGACCTATGCACCAGACGTCTGGATGGAAACTGTTGTTCTGCGCTGAGTGGAAACAGATCGGAAGAGCGGTTTCAG            |
| chr9  | 107550657 | 107550696 | ABCA1_3320 | - | GTGACCTATGCACCAGACGTCACTGAAAGCCAGCCTGTCTCCTTTGGCATCCTGACAATAGATCGGAAGAGCGGTTTCAG         |
| chr9  | 107553153 | 107553192 | ABCA1_3321 | - | GTGACCTATGCACCAGACGTAAGTGGCTTGATTTTGTCTGCAAAGACTTTGTTTTAATTAGATCGGAAGAGCGGTTTCAG         |
| chr9  | 107554167 | 107554206 | ABCA1_3322 | - | GTGACCTATGCACCAGACGTTTTGTCTATATTGCCGTTTGTCCCTATTAGTTCAGACTATCAGATCGGAAGAGCGGTTTCAG       |
| chr9  | 107555017 | 107555056 | ABCA1_3323 | - | GTGACCTATGCACCAGACGTACAGGTTACAATAGCTCATCTCAGTTTTTTTTTTCAGCTTTAAGATCGGAAGAGCGGTTTCAG      |
| chr9  | 107555402 | 107555441 | ABCA1_3324 | - | GTGACCTATGCACCAGACGTTCTGTAGAACCTGTGGAGCCCTGGAGCCTGGTTGAGGGTCCACAGAGAGATCGGAAGAGCGGTTTCAG |
| chr9  | 107556618 | 107556657 | ABCA1_3325 | - | GTGACCTATGCACCAGACGTCACTGGCTGTAGGATGCTTTAATGGAGATGGCACTCTGCAAGATCGGAAGAGCGGTTTCAG        |
| chr9  | 107558540 | 107558579 | ABCA1_3326 | - | GTGACCTATGCACCAGACGTTCTGAGTGAGGGAGCTGCACAGTGGATAAGGCATTTGGTGAGATCGGAAGAGCGGTTTCAG        |
| chr9  | 107560652 | 107560691 | ABCA1_3327 | - | GTGACCTATGCACCAGACGTAGGCCCTGCTGTATCTTTCTGATGTCTGTCAGGGCCATGGAAGATCGGAAGAGCGGTTTCAG       |
| chr9  | 107562050 | 107562089 | ABCA1_3328 | - | GTGACCTATGCACCAGACGTCTGTGTCTGTATAGATGGAGTGGGGCAAGGGAGAGGGTTAAGATCGGAAGAGCGGTTTCAG        |
| chr9  | 107562741 | 107562780 | ABCA1_3329 | - | GTGACCTATGCACCAGACGTGCTCTTTGCTTAGTAGCTTTTTGATGAACAATAATCCTTAAGATCGGAAGAGCGGTTTCAG        |
| chr9  | 107564285 | 107564324 | ABCA1_3330 | - | GTGACCTATGCACCAGACGTATCTGGATGGAAACTGTATCAGAAAAATGGGCATGTAGCTGTAGATCGGAAGAGCGGTTTCAG      |
| chr9  | 107565515 | 107565554 | ABCA1_3331 | - | GTGACCTATGCACCAGACGTGCTTTCTGGCACGTTTAGCTCAGGGGGAGGATGGTGTGAGATCGGAAGAGCGGTTTCAG          |
| chr9  | 107566857 | 107566896 | ABCA1_3332 | - | GTGACCTATGCACCAGACGTACTAAACTTGGCCCTGCCGTATTACTAATAGAGGAAGATCGGAAGAGCGGTTTCAG             |
| chr9  | 107568472 | 107568511 | ABCA1_3333 | - | GTGACCTATGCACCAGACGTTTCAGGGGGTGATTGGGCAGAAAGGGTGCAGGATGGGCTGAGATCGGAAGAGCGGTTTCAG        |
| chr9  | 107571697 | 107571736 | ABCA1_3334 | - | GTGACCTATGCACCAGACGTCTTAGCCATAAGCAGGCTTCTTGTGCTTGTGCCTGGTTAGATCGGAAGAGCGGTTTCAG          |
| chr9  | 107573031 | 107573070 | ABCA1_3335 | - | GTGACCTATGCACCAGACGTCTTACACTCCAGAGGGGTGAAGATCGAGCAGACCAAGATCGGAAGAGCGGTTTCAG             |
| chr9  | 107574805 | 107574844 | ABCA1_3336 | - | GTGACCTATGCACCAGACGCTGTTTTGCGCACAGACTCGGCTTTCATGGGTGGGCTGCAAGATCGGAAGAGCGGTTTCAG         |
| chr9  | 107576349 | 107576388 | ABCA1_3337 | - | GTGACCTATGCACCAGACGTGCAAGATCAAACAGTGTCTACTGTTTGAATGTGAAATTCAGATCGGAAGAGCGGTTTCAG         |
| chr9  | 107576658 | 107576697 | ABCA1_3338 | - | GTGACCTATGCACCAGACGTTGAGGGAGAATGGCACACTTAAGATAGTGCCCTCTGCTGGAGATCGGAAGAGCGGTTTCAG        |
| chr9  | 107578374 | 107578413 | ABCA1_3339 | - | GTGACCTATGCACCAGACGTTGGCTGACTGTCCGAATATATAGCAAAGGCCAAATGTCTTAAGATCGGAAGAGCGGTTTCAG       |
| chr9  | 107579563 | 107579602 | ABCA1_3340 | - | GTGACCTATGCACCAGACGTTGGGTTCTTATCCAGTGGTGGCTGAGCTTCCCCCAGCAGATCGGAAGAGCGGTTTCAG           |
| chr9  | 107580894 | 107580933 | ABCA1_3341 | - | GTGACCTATGCACCAGACGTGTCTTGGTCTGTTGCTGGGCTGGGCTGGGCTGGGCAAGATCGGAAGAGCGGTTTCAG            |
| chr9  | 107581817 | 107581856 | ABCA1_3342 | - | GTGACCTATGCACCAGACGTTGTATTTATTCTGAGTAAATGGACTGAGAGAGAGCGGGGAGATCGGAAGAGCGGTTTCAG         |
| chr9  | 107582158 | 107582197 | ABCA1_3343 | - | GTGACCTATGCACCAGACGTGAGCTACCTTCCCTATCCCTCTCCCTCCTCCTCCGGCTAAGATCGGAAGAGCGGTTTCAG         |
| chr9  | 107583606 | 107583645 | ABCA1_3344 | - | GTGACCTATGCACCAGACGTGCAGCACGTTAAGAAATAGGCCTTTTCTGGATGTGTGTGAGATCGGAAGAGCGGTTTCAG         |
| chr9  | 107584727 | 107584766 | ABCA1_3345 | - | GTGACCTATGCACCAGACGTGGTGTGGTTCCCGCAGAATCAGCCACAGGAGGGTCTGCAAGATCGGAAGAGCGGTTTCAG         |
| chr9  | 107586696 | 107586735 | ABCA1_3346 | - | GTGACCTATGCACCAGACGTTTGACCTCTGCTTTCTTTAACCTAGTGTCTGCTGCCTCAGATCGGAAGAGCGGTTTCAG          |
| chr9  | 107587914 | 107587953 | ABCA1_3347 | - | GTGACCTATGCACCAGACGTTGGGCTGCTGTTTTGGAAAATGACTTCTAGCTGATCGGATCGGAAGAGCGGTTTCAG            |
| chr9  | 107589179 | 107589218 | ABCA1_3348 | - | GTGACCTATGCACCAGACGTCTGGCCTTTCTTCACTGGCTGTAGGCATTTGACCTTCTTAGATCGGAAGAGCGGTTTCAG         |
| chr9  | 107591147 | 107591186 | ABCA1_3349 | - | GTGACCTATGCACCAGACGTCTCACTCGCTCTTCCCTGCCAGGAAACTCCGAAATAGCTCAGATCGGAAGAGCGGTTTCAG        |
| chr9  | 107593156 | 107593195 | ABCA1_3350 | - | GTGACCTATGCACCAGACGTTGCAAGCCACTGTTTTTAAACCAGTTTATACTGTGCCAGATAGATCGGAAGAGCGGTTTCAG       |
| chr9  | 107593853 | 107593892 | ABCA1_3351 | - | GTGACCTATGCACCAGACGTTCCCATCACACCAGCCTGGTCTTTGGGAGGTCCAGAGCACAGATCGGAAGAGCGGTTTCAG        |
| chr9  | 107594805 | 107594844 | ABCA1_3352 | - | GTGACCTATGCACCAGACGTTGCTGGATCTTAGAAAGACTTAACCGGTTCTTTCTCAGATCGGAAGAGCGGTTTCAG            |
| chr9  | 107599211 | 107599250 | ABCA1_3353 | - | GTGACCTATGCACCAGACGTCTCCCATTTATACCATGTGCTGCTTGATACTGGAGAGGTAGATCGGAAGAGCGGTTTCAG         |
| chr9  | 107599659 | 107599698 | ABCA1_3354 | - | GTGACCTATGCACCAGACGTCCCAGCCAAAGACTCCCTCCCAGAATCTCCCAGAACTGAGATCGGAAGAGCGGTTTCAG          |
| chr9  | 107602510 | 107602549 | ABCA1_3355 | - | GTGACCTATGCACCAGACGTATGCAGACCCAGCCCTGTCCCAACCCCATCCCTCCCTTAGATCGGAAGAGCGGTTTCAG          |
| chr9  | 107607708 | 107607747 | ABCA1_3356 | - | GTGACCTATGCACCAGACGTTCTTCCAGTACCAGGAAAGCGGATCATCCACTGTATCAGTAGATCGGAAGAGCGGTTTCAG        |
| chr9  | 107620753 | 107620792 | ABCA1_3357 | - | GTGACCTATGCACCAGACGTTTGCCTACTGGAGAACTCAAGCATAATGCTTTTCGAAAGATCGGAAGAGCGGTTTCAG           |
| chr9  | 107623910 | 107623949 | ABCA1_3358 | - | GTGACCTATGCACCAGACGTGCTCCAGCTTCCCTCAGTAAAGCTGATGGCAATTGAGATCGGAAGAGCGGTTTCAG             |
| chr9  | 107645270 | 107645309 | ABCA1_3359 | - | GTGACCTATGCACCAGACGTACCTTCTGCTCCGTTTATAATTGGAATTTGACCTGCAAGATCGGAAGAGCGGTTTCAG           |
| chr9  | 107646658 | 107646697 | ABCA1_3360 | - | GTGACCTATGCACCAGACGTGATCAGGTTTTCTTTCCAAACTTGTGACTTAATCTTTTCAGATCGGAAGAGCGGTTTCAG         |
| chr9  | 107651333 | 107651372 | ABCA1_3361 | - | GTGACCTATGCACCAGACGTGTGGATGTTGCCTGAGACTACCAATGGCAGGAAAATCCAGATCGGAAGAGCGGTTTCAG          |
| chr9  | 107665845 | 107665884 | ABCA1_3362 | - | GTGACCTATGCACCAGACGTGTTTTTCAGCAGCGGGGGTCTCTCATTTTTTCTTTGTGAGATCGGAAGAGCGGTTTCAG          |
| chr19 | 1452951   | 1452990   | APC2_3363  | - | GTGACCTATGCACCAGACGTTGGAGCTGGGATCAGAGGTTCCAGAGGTTCCAGTATAGATCGGAAGAGCGGTTTCAG            |
| chr19 | 1453196   | 1453235   | APC2_3364  | - | GTGACCTATGCACCAGACGTGGGAAAAGGGCGGGAAGCCATGACGACTGCATGGGCTAGATCGGAAGAGCGGTTTCAG           |

|       |           |           |              |   |                                                                                     |
|-------|-----------|-----------|--------------|---|-------------------------------------------------------------------------------------|
| chr19 | 1453380   | 1453419   | APC2_3365    | - | GTGACCTATGCACCAGACGTGGGGACAGGGCGGAGGTCAGCGGCCCTGCCTGCCTTTCCAGATCGGAAGAGCGGTTTCAG    |
| chr19 | 1455098   | 1455137   | APC2_3366    | - | GTGACCTATGCACCAGACGTAGTCAGCGGGGGCGGGCTCAGAGGGCGCGCCGTGTGTGTAGATCGGAAGAGCGGTTTCAG    |
| chr19 | 1455333   | 1455372   | APC2_3367    | - | GTGACCTATGCACCAGACGTGACGGCGGGCGGGCCACGGTGAGGGGGCGCCGGGGCCAGGCCAGATCGGAAGAGCGGTTTCAG |
| chr19 | 1456255   | 1456294   | APC2_3368    | - | GTGACCTATGCACCAGACGTAGCACCAGGGTCGGGGGTACAGTCCCAGAGCACCCAGTCTAGATCGGAAGAGCGGTTTCAG   |
| chr19 | 1456802   | 1456841   | APC2_3369    | - | GTGACCTATGCACCAGACGTGGCAGGGTCAGGGTGGGGTCCCTCACCTGCCCCCGCACAAAGATCGGAAGAGCGGTTTCAG   |
| chr19 | 1457914   | 1457953   | APC2_3370    | - | GTGACCTATGCACCAGACGTAGGGACCATGATCAGAGCCCCATCCCAGGAAATGTCCCAAGATCGGAAGAGCGGTTTCAG    |
| chr19 | 1460130   | 1460169   | APC2_3371    | - | GTGACCTATGCACCAGACGTCAAACAAGTTGGTGGGTGCCAGGGATGACCCTGCCTGTAGATCGGAAGAGCGGTTTCAG     |
| chr19 | 1460729   | 1460768   | APC2_3372    | - | GTGACCTATGCACCAGACGTATATGCAGCGGGGTACAGGGGTTGGGACACAAAGGGAGACAGATCGGAAGAGCGGTTTCAG   |
| chr19 | 1460986   | 1461025   | APC2_3373    | - | GTGACCTATGCACCAGACGTTGAGGGGCAAGTGTGGTGGGACTAGGGTCCAGGCCCCCAAGATCGGAAGAGCGGTTTCAG    |
| chr19 | 1461912   | 1461951   | APC2_3374    | - | GTGACCTATGCACCAGACGTGGCGGGAGAGGGGGCGGGTACAGGGCCTGAGTGGCCCGGAGGAGATCGGAAGAGCGGTTTCAG |
| chr19 | 1465104   | 1465143   | APC2_3375    | - | GTGACCTATGCACCAGACGTAGGGCGGGTTAGCCTGGGCGACCCCCACCCTCCCCTGCCAGATCGGAAGAGCGGTTTCAG    |
| chr19 | 1465564   | 1465603   | APC2_3376    | - | GTGACCTATGCACCAGACGTGCCAGGCCCTCAGGTGTCGACGGGGCGGCAGCGGCTTCTAGATCGGAAGAGCGGTTTCAG    |
| chr19 | 1466024   | 1466063   | APC2_3377    | - | GTGACCTATGCACCAGACGTGCTGCGGTGGGGCCGCTTGAGCCGACGACGCGGGTGGCGCCAGATCGGAAGAGCGGTTTCAG  |
| chr19 | 1466484   | 1466523   | APC2_3378    | - | GTGACCTATGCACCAGACGTAGGAAAGGGAGCTGCATCGGGACAGCGAGAGTGGCCCTCAGATCGGAAGAGCGGTTTCAG    |
| chr19 | 1466944   | 1466983   | APC2_3379    | - | GTGACCTATGCACCAGACGTTGGGTGGCCTCGGGGGGACCCTGTGGCGGGGGCGCCAGCGAGATCGGAAGAGCGGTTTCAG   |
| chr19 | 1467404   | 1467443   | APC2_3380    | - | GTGACCTATGCACCAGACGTGGCCGGGGCGGGACCAACATGTAGACGGGCACGGGGAGTAGATCGGAAGAGCGGTTTCAG    |
| chr19 | 1467864   | 1467903   | APC2_3381    | - | GTGACCTATGCACCAGACGTGAGGGATGGCCGATGTGCGCCGGTGGGTTGGCGTGGGCGCAGATCGGAAGAGCGGTTTCAG   |
| chr19 | 1468324   | 1468363   | APC2_3382    | - | GTGACCTATGCACCAGACGTGCGCGCCACTCCACGCTATCCAGGTCGGAGGCCGTCGAGATCGGAAGAGCGGTTTCAG      |
| chr19 | 1468784   | 1468823   | APC2_3383    | - | GTGACCTATGCACCAGACGTCCGCGACCGCTGCTGCCCGGGGCTCGGGACTTTGGCTGGAAGATCGGAAGAGCGGTTTCAG   |
| chr19 | 1469244   | 1469283   | APC2_3384    | - | GTGACCTATGCACCAGACGTGCTGTGCCGGAAGCCGAGCGGTCGGAGGACTCGCTGCCAGATCGGAAGAGCGGTTTCAG     |
| chr19 | 1469704   | 1469743   | APC2_3385    | - | GTGACCTATGCACCAGACGTGCCGCCAGGTCGTGCCCGGGCGCGCCACCCTGGGGAGCGAGATCGGAAGAGCGGTTTCAG    |
| chr20 | 54945164  | 54945203  | AURKA_3386   | - | GTGACCTATGCACCAGACGTGGGGGAGAAATCCTTGACACAGGCTGCCATATAACCTGAAGATCGGAAGAGCGGTTTCAG    |
| chr20 | 54945491  | 54945530  | AURKA_3387   | - | GTGACCTATGCACCAGACGTGAAAGGACCCAGCACATGCTGGAATTTCTTCTAGATCGGAAGAGCGGTTTCAG           |
| chr20 | 54948414  | 54948453  | AURKA_3388   | - | GTGACCTATGCACCAGACGTTAGAGGTTGGAAGTGTGTTGTTTACCAGCCCTGGGAGATCGGAAGAGCGGTTTCAG        |
| chr20 | 54956439  | 54956478  | AURKA_3389   | - | GTGACCTATGCACCAGACGTATTTATTGTCCAGGCTAATTGTGTTTCTTTATACCTGTAGATCGGAAGAGCGGTTTCAG     |
| chr20 | 54957991  | 54958030  | AURKA_3390   | - | GTGACCTATGCACCAGACGTAGGTTTCATGTTCAAAGAAATGTTCCACCAATGCTGCACCCAGATCGGAAGAGCGGTTTCAG  |
| chr20 | 54959276  | 54959315  | AURKA_3391   | - | GTGACCTATGCACCAGACGTATTTATTAACAAGTCTGTACTGTTCTACTAGAATATATAAGATCGGAAGAGCGGTTTCAG    |
| chr20 | 54961263  | 54961302  | AURKA_3392   | - | GTGACCTATGCACCAGACGTGTTTGTAGACTATTGGATAGTCTTCTTTGTGCTGTTGAGATCGGAAGAGCGGTTTCAG      |
| chr20 | 54963162  | 54963201  | AURKA_3393   | - | GTGACCTATGCACCAGACGTAACTCTGTAATCTCATTACATTTATAAACCCACATGGAGAGATCGGAAGAGCGGTTTCAG    |
| chr6  | 41903628  | 41903667  | CCND3_3394   | - | GTGACCTATGCACCAGACGTGCCCTGTGAGTGGCCATAAGCAGAGAGGGGGCGCTGCAGATCGGAAGAGCGGTTTCAG      |
| chr6  | 41904247  | 41904286  | CCND3_3395   | - | GTGACCTATGCACCAGACGTGGTAGCTGGGCAGCAGCCTCTCCATTATAAAGTAGTGTAGATCGGAAGAGCGGTTTCAG     |
| chr6  | 41904923  | 41904962  | CCND3_3396   | - | GTGACCTATGCACCAGACGTTATGCACATTTTGGCAAATTTGGAATAATCAGAAAGACTTAAGATCGGAAGAGCGGTTTCAG  |
| chr6  | 41908058  | 41908097  | CCND3_3397   | - | GTGACCTATGCACCAGACGTAATCCCCCCACCCCGACACGATTTGTCTCCCACTTTTCAGATCGGAAGAGCGGTTTCAG     |
| chr6  | 41909140  | 41909179  | CCND3_3398   | - | GTGACCTATGCACCAGACGTGACGCGTCCCCCTCCCCACCGCTCCCGGGTCTGGACACAAGATCGGAAGAGCGGTTTCAG    |
| chrX  | 135730358 | 135730397 | CD40LG_3399  | - | GTGACCTATGCACCAGACGTAGTTGAAATGGTATCTTCTGCGCAGAGAAGGTTGGCAGAGGATCGGAAGAGCGGTTTCAG    |
| chrX  | 135732375 | 135732414 | CD40LG_3400  | - | GTGACCTATGCACCAGACGTATAACAAGGATATGATAAATGTCATTGCGAAGGAGAATACAGATCGGAAGAGCGGTTTCAG   |
| chrX  | 135736482 | 135736521 | CD40LG_3401  | - | GTGACCTATGCACCAGACGTAAAGCATTGCAAGAGGTCATTTTACAGGGGCTCTGCTGTAGATCGGAAGAGCGGTTTCAG    |
| chrX  | 135738465 | 135738504 | CD40LG_3402  | - | GTGACCTATGCACCAGACGTACCAAAACTGTAGGCTAAAATAATGCAAAAACTGCCAAAGATCGGAAGAGCGGTTTCAG     |
| chrX  | 135741148 | 135741187 | CD40LG_3403  | - | GTGACCTATGCACCAGACGTGAAAGGGAAAGTTTGTGGTGGAGGTAAGCAGAGCATGGTTAGATCGGAAGAGCGGTTTCAG   |
| chr13 | 28537202  | 28537241  | CDX2_3404    | - | GTGACCTATGCACCAGACGTTCTGCAGCGCCAGGCAATTCAGGCTGAGCCATGAGGAGAGATCGGAAGAGCGGTTTCAG     |
| chr13 | 28538957  | 28538996  | CDX2_3405    | - | GTGACCTATGCACCAGACGTCCTAGCTCCCGGCAAGCCGCACTGCCCTGGCAGAGACAGATCGGAAGAGCGGTTTCAG      |
| chr13 | 28542553  | 28542592  | CDX2_3406    | - | GTGACCTATGCACCAGACGTGCTGCGCCCTTCGGAGGGTGTCTGGGAAGGCGCGGGTTCAGATCGGAAGAGCGGTTTCAG    |
| chr13 | 28542823  | 28542862  | CDX2_3407    | - | GTGACCTATGCACCAGACGTGGCCCTCAACGGTGGCTCCCCGGCCGACGATGGCTACAGATCGGAAGAGCGGTTTCAG      |
| chr15 | 51502955  | 51502994  | CYP19A1_3408 | - | GTGACCTATGCACCAGACGTTACGTAACCACTTGGAGCATTCTCATCAGTAGTTCACAAGATCGGAAGAGCGGTTTCAG     |
| chr15 | 51504467  | 51504506  | CYP19A1_3409 | - | GTGACCTATGCACCAGACGTTTCCATAAACTGATGTGCCACTCTTGAAGATGCAACTAGATCGGAAGAGCGGTTTCAG      |
| chr15 | 51507217  | 51507256  | CYP19A1_3410 | - | GTGACCTATGCACCAGACGTAACTAAATAATACATCTTAAAAACAATTTCTTCTGAAAGATCGGAAGAGCGGTTTCAG      |
| chr15 | 51507850  | 51507889  | CYP19A1_3411 | - | GTGACCTATGCACCAGACGTGAACAACTGTAATTTCCCTGCCACATATGTTATGACTGTAGATCGGAAGAGCGGTTTCAG    |
| chr15 | 51510688  | 51510727  | CYP19A1_3412 | - | GTGACCTATGCACCAGACGTCAACTTTGGAAGATTTATGAGTACAATTTGATTGGTTTTTATAGATCGGAAGAGCGGTTTCAG |
| chr15 | 51514496  | 51514535  | CYP19A1_3413 | - | GTGACCTATGCACCAGACGTTTCACTCTCACATCTTGACCATCTGTCCCTTACTGAACAAGATCGGAAGAGCGGTTTCAG    |
| chr15 | 51519926  | 51519965  | CYP19A1_3414 | - | GTGACCTATGCACCAGACGTACTTAGTTAGCTACAATCTTTTTTGTCTATGAATGTGCTAGATCGGAAGAGCGGTTTCAG    |
| chr15 | 51529006  | 51529045  | CYP19A1_3415 | - | GTGACCTATGCACCAGACGTTCAATCTGAAGACATACTTTTAACTCGAGGCTGGAGTTAGATCGGAAGAGCGGTTTCAG     |
| chr15 | 51534915  | 51534954  | CYP19A1_3416 | - | GTGACCTATGCACCAGACGTCATTATTTCTGTATCTAAGGAGATTAATTTACTTGGGATTAGATCGGAAGAGCGGTTTCAG   |
| chr20 | 31367872  | 31367911  | DNMT3B_3417  | - | GTGACCTATGCACCAGACGTTGTCCGAAGGCTCAGACGCCAGCACCCAGGACAGAGTGGAGATCGGAAGAGCGGTTTCAG    |
| chr20 | 31368074  | 31368113  | DNMT3B_3418  | - | GTGACCTATGCACCAGACGTAGCCAGAATGGGTGGGGTGAAGGGAAGCAGGGACATGAGAGATCGGAAGAGCGGTTTCAG    |
| chr20 | 31368080  | 31368119  | DNMT3B_3419  | - | GTGACCTATGCACCAGACGTGGGAGAAAGCCAGAATGGGTGGGGTGAAGGGAAGCAGGGAAGATCGGAAGAGCGGTTTCAG   |
| chr20 | 31369109  | 31369148  | DNMT3B_3420  | - | GTGACCTATGCACCAGACGTAACAGCCAGGAGTCTGTTTTGGGGGCGAGCCAGCTAGATCGGAAGAGCGGTTTCAG        |
| chr20 | 31372514  | 31372553  | DNMT3B_3421  | - | GTGACCTATGCACCAGACGTAACAGATGATGAACATGATGAAGCCAGGCTATCAGCAAGATCGGAAGAGCGGTTTCAG      |
| chr20 | 31374258  | 31374297  | DNMT3B_3422  | - | GTGACCTATGCACCAGACGTGAGAGGACACTGAGGCTTGGGCTTAGGTTGACTGGAGGCTGGAGATCGGAAGAGCGGTTTCAG |

|       |          |          |             |   |                                                                                               |
|-------|----------|----------|-------------|---|-----------------------------------------------------------------------------------------------|
| chr20 | 31374986 | 31375025 | DNMT3B_3423 | - | GTGACCTATGCACCAGACGTAAGGACACATAGTTTGGGCCAGAGCAAAGGATGTCGGTGAAGATCGGAAGAGCGGTTTCAG             |
| chr20 | 31376610 | 31376649 | DNMT3B_3424 | - | GTGACCTATGCACCAGACGTTACCCACATGAAGAAATCCCAGTGAGGAGAGGCCATCCTGGAGATCGGAAGAGCGGTTTCAG            |
| chr20 | 31379357 | 31379396 | DNMT3B_3425 | - | GTGACCTATGCACCAGACGTAAGACATCATCAACATCCACCTACAGGTGTGTCCCAGGTGAGATCGGAAGAGCGGTTTCAG             |
| chr20 | 31380382 | 31380421 | DNMT3B_3426 | - | GTGACCTATGCACCAGACGTAGAGTCTGTGATGAATGGGGGGTGGGGAGGAGGTGCTCGAGATCGGAAGAGCGGTTTCAG              |
| chr20 | 31383165 | 31383204 | DNMT3B_3427 | - | GTGACCTATGCACCAGACGTTAATTAGACTGCAGCCGTGGCTTGGTAGGAGGGTCCAGAGAGATCGGAAGAGCGGTTTCAG             |
| chr20 | 31383406 | 31383445 | DNMT3B_3428 | - | GTGACCTATGCACCAGACGTAAGAAGAAGGCATGAGATGAGGTGAGGTCAGGAGCCGGGTACAGAGATCGGAAGAGCGGTTTCAG         |
| chr20 | 31384585 | 31384586 | DNMT3B_3429 | - | GTGACCTATGCACCAGACGTTAAAGATGACAGCCGAGGGTTGTGGCTTTTGGCAGTTGAGGCCCTGACACCAAGATCGGAAGAGCGGTTTCAG |
| chr20 | 31384943 | 31384982 | DNMT3B_3430 | - | GTGACCTATGCACCAGACGTGAGAGAAACACCAAGTGAATCGGAGACCAGAGAAGGGCAGAGATCGGAAGAGCGGTTTCAG             |
| chr20 | 31386216 | 31386255 | DNMT3B_3431 | - | GTGACCTATGCACCAGACGTTGGCAGGGAGAAGGGATGCCTTTGTCAGAGCTGGTCTCCTAGATCGGAAGAGCGGTTTCAG             |
| chr20 | 31387000 | 31387039 | DNMT3B_3432 | - | GTGACCTATGCACCAGACGTAGGAAGGAGGTCATGGTGGTGAAGGCACAGGGCAAAGACTAGATCGGAAGAGCGGTTTCAG             |
| chr20 | 31387909 | 31387948 | DNMT3B_3433 | - | GTGACCTATGCACCAGACGTGACAGAGACACAGAAGCATAAATGATGCTGAGCACACAGCAGATCGGAAGAGCGGTTTCAG             |
| chr20 | 31388591 | 31388630 | DNMT3B_3434 | - | GTGACCTATGCACCAGACGTGAGACAGAGTCAGGATGAGGGTGTGGACAGAGGGAAAGAGAGATCGGAAGAGCGGTTTCAG             |
| chr20 | 31389034 | 31389073 | DNMT3B_3435 | - | GTGACCTATGCACCAGACGTTAAAGATGACAGCCGAGGGTTCATTTGAAACCTCCAGCCAGATCGGAAGAGCGGTTTCAG              |
| chr20 | 31390141 | 31390180 | DNMT3B_3436 | - | GTGACCTATGCACCAGACGTTAAAGAAGGTTACTGTTAGGAGCCTATTATTAGAGTTTCAGAGATCGGAAGAGCGGTTTCAG            |
| chr20 | 31393094 | 31393133 | DNMT3B_3437 | - | GTGACCTATGCACCAGACGTCCAAAACCCATTACTTCTTACTAGCTATAGAGGGTCCCTAGATCGGAAGAGCGGTTTCAG              |
| chr20 | 31393965 | 31394004 | DNMT3B_3438 | - | GTGACCTATGCACCAGACGTTAAATGACATCATGGAGTGAGCACAGAATGAAGGGACCTGGAGATCGGAAGAGCGGTTTCAG            |
| chr20 | 31395518 | 31395557 | DNMT3B_3439 | - | GTGACCTATGCACCAGACGTCGGAGTGAAAGACAGCAAGTCAAGATGCCTCCAGGATGAGATCGGAAGAGCGGTTTCAG               |
| chr19 | 45912883 | 45912922 | ERCC1_3440  | - | GTGACCTATGCACCAGACGTTGCCAAGGAAACCCAGTGAATAAATAATCGTCCTCCAGATCGGAAGAGCGGTTTCAG                 |
| chr19 | 45916885 | 45916924 | ERCC1_3441  | - | GTGACCTATGCACCAGACGTTGGGAAAGAACCAGAGGTTGGGGAAAGGAGAGAGCCCCAGATCGGAAGAGCGGTTTCAG               |
| chr19 | 45917171 | 45917210 | ERCC1_3442  | - | GTGACCTATGCACCAGACGTGCTCCCCTGCCCATAGGCATTTCTGTCCCCTTGCCCTTTAGATCGGAAGAGCGGTTTCAG              |
| chr19 | 45918069 | 45918108 | ERCC1_3443  | - | GTGACCTATGCACCAGACGTCTCACTCCCATCCTGCCTGGGCCCTCCCGCAGCTCCTGAGATCGGAAGAGCGGTTTCAG               |
| chr19 | 45920029 | 45920068 | ERCC1_3444  | - | GTGACCTATGCACCAGACGTGGCTTCCCTGCCTCATTAGGCTCCACCTGGGATTGGTCCAGATCGGAAGAGCGGTTTCAG              |
| chr19 | 45922345 | 45922384 | ERCC1_3445  | - | GTGACCTATGCACCAGACGTGCTGCTCCCTGCCAGCCCTACCCGGCTTTGAGGTTGTGCAGATCGGAAGAGCGGTTTCAG              |
| chr19 | 45923532 | 45923571 | ERCC1_3446  | - | GTGACCTATGCACCAGACGTCGGCGCCACCCAGACTTCAGGAAGGGCACCCCTGGCCAGATCGGAAGAGCGGTTTCAG                |
| chr19 | 45924386 | 45924425 | ERCC1_3447  | - | GTGACCTATGCACCAGACGTAGACGGAGAAGTGAGGCCCTTGGAGTTTTCAGTGGGAAACGAGATCGGAAGAGCGGTTTCAG            |
| chr19 | 45926478 | 45926517 | ERCC1_3448  | - | GTGACCTATGCACCAGACGTGAGATGCGGGGCCCTGGGAGGCTGGGGGCTGTTAGACGAGATCGGAAGAGCGGTTTCAG               |
| chr16 | 14013973 | 14014012 | ERCC4_3449  | - | GTGACCTATGCACCAGACGTCGGGTCGCAGCCGAACGCAGCCGAAGGAAGCCGACTCCTAGATCGGAAGAGCGGTTTCAG              |
| chr16 | 14015838 | 14015877 | ERCC4_3450  | - | GTGACCTATGCACCAGACGTTCAAACCTTGATTAGTAGGCTATTTAATACAGGGCAGTTTTAGATCGGAAGAGCGGTTTCAG            |
| chr16 | 14021835 | 14021874 | ERCC4_3451  | - | GTGACCTATGCACCAGACGTTAAATATTTTCAACAATTTTCTAGAGTTTTCAGCAGCTATGAGATCGGAAGAGCGGTTTCAG            |
| chr16 | 14024517 | 14024556 | ERCC4_3452  | - | GTGACCTATGCACCAGACGTTAAATAATTTGCTATTTGCTAAATATGTTAAGTATAGTTAAGATCGGAAGAGCGGTTTCAG             |
| chr16 | 14025964 | 14026003 | ERCC4_3453  | - | GTGACCTATGCACCAGACGTAAGTTAAAGAAAAAGTGCCATCAATTTATGGTTAATTTAAGATCGGAAGAGCGGTTTCAG              |
| chr16 | 14027999 | 14028038 | ERCC4_3454  | - | GTGACCTATGCACCAGACGTATAAAAATATCTCATTCTATGTGATAAATTTACCCATAAAGATCGGAAGAGCGGTTTCAG              |
| chr16 | 14028953 | 14028992 | ERCC4_3455  | - | GTGACCTATGCACCAGACGTTAAACAACATTATGTTACTATTACCTCACTTGTCCCTCTAAGATCGGAAGAGCGGTTTCAG             |
| chr16 | 14031573 | 14031612 | ERCC4_3456  | - | GTGACCTATGCACCAGACGTAGACAGAATTTTAGGTTGGAAAAACAGCATTTTAATCCAGATCGGAAGAGCGGTTTCAG               |
| chr16 | 14038530 | 14038569 | ERCC4_3457  | - | GTGACCTATGCACCAGACGTTAAACACTTCTCAACACTTCTGAAACAAATTTCAAATTTAAGATCGGAAGAGCGGTTTCAG             |
| chr16 | 14041421 | 14041460 | ERCC4_3458  | - | GTGACCTATGCACCAGACGTTAAAGTAAGTAATGTCCTACTGGGGAAGAACTCTCAAAGAAGGAGATCGGAAGAGCGGTTTCAG          |
| chr16 | 14029252 | 14029291 | ERCC4_3459  | - | GTGACCTATGCACCAGACGTGGTTTTCTACCATTGAGTTAAGGTCAACTTCCGTTTTTAGATCGGAAGAGCGGTTTCAG               |
| chr16 | 14041788 | 14041827 | ERCC4_3460  | - | GTGACCTATGCACCAGACGTTAAGAAGAGTGAGTTTGGAACTAATGTCATTGCTGGAGATAGATCGGAAGAGCGGTTTCAG             |
| chr17 | 41605837 | 41605876 | ETV4_3461   | - | GTGACCTATGCACCAGACGTCGTGTTCCCTGCTCCGCGAGGTGGTGCTGCCCTGTGTACATAGATCGGAAGAGCGGTTTCAG            |
| chr17 | 41606453 | 41606492 | ETV4_3462   | - | GTGACCTATGCACCAGACGTTGGGTCACGGCAAGGTGGTGGGGGGCAGTGGCTGTGAGAGATCGGAAGAGCGGTTTCAG               |
| chr17 | 41606822 | 41606861 | ETV4_3463   | - | GTGACCTATGCACCAGACGTCGGATGTTCCAGCCCTCCTTTCCAAAGTTTACAGCTGGAGATCGGAAGAGCGGTTTCAG               |
| chr17 | 41607202 | 41607241 | ETV4_3464   | - | GTGACCTATGCACCAGACGTTGACTGTTGATGGGAGGGTCAAGGCTTTATCACGCTGTGTAGATCGGAAGAGCGGTTTCAG             |
| chr17 | 41607425 | 41607464 | ETV4_3465   | - | GTGACCTATGCACCAGACGTCCTCCCTTCCCTGCCAAGCCCTCCATGTTGGGGAGGGAGAGATCGGAAGAGCGGTTTCAG              |
| chr17 | 41609992 | 41610031 | ETV4_3466   | - | GTGACCTATGCACCAGACGTTGGGGTGGGGCAGGGTGGCATGTGATCAAGTGTTCAGTTAAAGATCGGAAGAGCGGTTTCAG            |
| chr17 | 41610505 | 41610544 | ETV4_3467   | - | GTGACCTATGCACCAGACGTAGGGAAACCCACTGCTCATGGGCCAGGTGTTTTTTCAATAGATCGGAAGAGCGGTTTCAG              |
| chr17 | 41611177 | 41611216 | ETV4_3468   | - | GTGACCTATGCACCAGACGTGCCCTGGACCTGGTGAAGGTAGGAGGGTCCAGAGGAAGATCGGAAGAGCGGTTTCAG                 |
| chr17 | 41613744 | 41613783 | ETV4_3469   | - | GTGACCTATGCACCAGACGTGTCCTGGGGAGAGGGTATAGGGAGTGGAGGATGGCAGGAAGATCGGAAGAGCGGTTTCAG              |
| chr17 | 41622293 | 41622332 | ETV4_3470   | - | GTGACCTATGCACCAGACGTTTGTGACCTTTTCTATTTTGGGAGGCTGGACAGGGGGACAAGATCGGAAGAGCGGTTTCAG             |
| chr15 | 91428226 | 91428265 | FES_3471    | - | GTGACCTATGCACCAGACGTTGGGGACAGAAAAGGGGCCATCCTGGAGGCAAGGCAGCAAGATCGGAAGAGCGGTTTCAG              |
| chr15 | 91428592 | 91428631 | FES_3472    | - | GTGACCTATGCACCAGACGTGAGATGGGGAGGCGAGGGGGGGCAATGGCTCCCAAAGATCGGAAGAGCGGTTTCAG                  |
| chr15 | 91430141 | 91430180 | FES_3473    | - | GTGACCTATGCACCAGACGTAGGAGAGGGCCAGTGTGGGGCAGCAGGTCCCAAGTTGGAAGATCGGAAGAGCGGTTTCAG              |
| chr15 | 91430367 | 91430406 | FES_3474    | - | GTGACCTATGCACCAGACGTTGGGGCAGGGGTATAGATGACAGCATGGAGGCCAGGCAAGATCGGAAGAGCGGTTTCAG               |
| chr15 | 91432697 | 91432736 | FES_3475    | - | GTGACCTATGCACCAGACGTCAGCGCCCCGTGAGTGACAGGCCAGCAGCCCTGGGCCAAAGATCGGAAGAGCGGTTTCAG              |
| chr15 | 91433020 | 91433059 | FES_3476    | - | GTGACCTATGCACCAGACGTGAGAAGGGCAGCATTAGAACCAGCCCTCCTGCCCTCAAGATCGGAAGAGCGGTTTCAG                |
| chr15 | 91433272 | 91433311 | FES_3477    | - | GTGACCTATGCACCAGACGTTGGCGGGTGGGAGGGTGGATGAGAATAAGGGCTCGGCTGAGATCGGAAGAGCGGTTTCAG              |
| chr15 | 91433581 | 91433620 | FES_3478    | - | GTGACCTATGCACCAGACGTGGACAGACGTCAGCGGGTGGCCAGGCTTAGGGAGGGGGAGAGATCGGAAGAGCGGTTTCAG             |
| chr15 | 91434162 | 91434201 | FES_3479    | - | GTGACCTATGCACCAGACGTGAGGATCGAGGAGGACCTTAAACCTTTGTTGAAGAGATCGGAAGAGCGGTTTCAG                   |
| chr15 | 91434734 | 91434773 | FES_3480    | - | GTGACCTATGCACCAGACGTTGGGACCCGGGTCAGCAGCCTCCTTCTGAGGGGCGTGAGATCGGAAGAGCGGTTTCAG                |

|       |           |           |            |   |                                                                                       |
|-------|-----------|-----------|------------|---|---------------------------------------------------------------------------------------|
| chr15 | 91435238  | 91435277  | FES_3481   | - | GTGACCTATGCACCAGACGTGAGGAGACAGGGGATCAGAAGTCTGAAGAAAAGGGGTGCTAGATCGGAAGAGCGGTTTCAG     |
| chr15 | 91435887  | 91435926  | FES_3482   | - | GTGACCTATGCACCAGACGCTTTGGGCTCCTACCACGGCCTCCAGTCCCGCAGTTCTCAGATCGGAAGAGCGGTTTCAG       |
| chr15 | 91436280  | 91436319  | FES_3483   | - | GTGACCTATGCACCAGACGCTGTGCTCAGGATCTACGTGGCCAGGCCCGCTCCCCAGAGATCGGAAGAGCGGTTTCAG        |
| chr15 | 91436471  | 91436510  | FES_3484   | - | GTGACCTATGCACCAGACGTGGAGGACCCCTGCTGAGCCTCCTGAGGTAAGGCTGCCACCAGATCGGAAGAGCGGTTTCAG     |
| chr15 | 91436834  | 91436873  | FES_3485   | - | GTGACCTATGCACCAGACGTCAGGGCAGGGGCTCATTGGCCAACAGTCCGCTGCCACAGATCGGAAGAGCGGTTTCAG        |
| chr15 | 91437116  | 91437155  | FES_3486   | - | GTGACCTATGCACCAGACGTGGCGAGGAGGTGAGGCAGCGTGTAGTGCACCCTCCCTGGGGAGATCGGAAGAGCGGTTTCAG    |
| chr15 | 91438596  | 91438635  | FES_3487   | - | GTGACCTATGCACCAGACGTAAAGCACAGCACAGCAGCAGGATGAGGGAGTGTGAGGGTGCATCGGAAGAGCGGTTTCAG      |
| chr4  | 144258292 | 144258331 | GAB1_3488  | - | GTGACCTATGCACCAGACGTTCTCGGGCTCCGGGCCGGGCAGCTGAGGGGGCGGGCGCAGATCGGAAGAGCGGTTTCAG       |
| chr4  | 144336580 | 144336619 | GAB1_3489  | - | GTGACCTATGCACCAGACGTAACAAAATATCCATTCACTATTAACCTTGTAGATAATGTTTAGATCGGAAGAGCGGTTTCAG    |
| chr4  | 144354594 | 144354633 | GAB1_3490  | - | GTGACCTATGCACCAGACGTAAAGTTTAACTATCACGCTATCACAGTTAAACAATTTTATAGATCGGAAGAGCGGTTTCAG     |
| chr4  | 144359102 | 144359141 | GAB1_3491  | - | GTGACCTATGCACCAGACGTATTGTTAATGACACAATAAAAGGTGGAGACTAAGAATAAGATCGGAAGAGCGGTTTCAG       |
| chr4  | 144360905 | 144360944 | GAB1_3492  | - | GTGACCTATGCACCAGACGTGAACAAAATCAACATTTATCCCATCTTTGCCAGCTCTAGATCGGAAGAGCGGTTTCAG        |
| chr4  | 144361182 | 144361221 | GAB1_3493  | - | GTGACCTATGCACCAGACGTATATATTTCTTTAATAAACAACAACTCTTGTACACATAGATCGGAAGAGCGGTTTCAG        |
| chr4  | 144378783 | 144378822 | GAB1_3494  | - | GTGACCTATGCACCAGACGTAAAGAAGACTCTCTTAATATAATGTTATTTAATTTGGAGATCGGAAGAGCGGTTTCAG        |
| chr4  | 144380488 | 144380527 | GAB1_3495  | - | GTGACCTATGCACCAGACGTAAAGAGAAAAGAGATTTTATGATACAGAACTTTGGAAAAGATCGGAAGAGCGGTTTCAG       |
| chr4  | 144381467 | 144381506 | GAB1_3496  | - | GTGACCTATGCACCAGACGTAAATATCATCACAAACATAAGCCTTGACAAAATATCTAAGATCGGAAGAGCGGTTTCAG       |
| chr4  | 144387206 | 144387245 | GAB1_3497  | - | GTGACCTATGCACCAGACGTTAGACAACAAAATCAACGGTCAGACATTCCACAGACATACAGATCGGAAGAGCGGTTTCAG     |
| chr4  | 144390134 | 144390173 | GAB1_3498  | - | GTGACCTATGCACCAGACGTAAAGAAAACAACAAAGCTCAACATATAAAGGAGTGTCTAGATCGGAAGAGCGGTTTCAG       |
| chr4  | 144359403 | 144359442 | GAB1_3499  | - | GTGACCTATGCACCAGACGTTCTCGATGCCAGATGGGGTATAAAAACATAGAGTTCTCAGATCGGAAGAGCGGTTTCAG       |
| chr7  | 81331847  | 81331886  | HGF_3500   | - | GTGACCTATGCACCAGACGTTGTGTCTGAAGCACCCACCAATAACAACGTCTTTTACATGAGATCGGAAGAGCGGTTTCAG     |
| chr7  | 81334656  | 81334695  | HGF_3501   | - | GTGACCTATGCACCAGACGTAGTTCTTTAATAAGGAGTATGTGATTCATAGCTTAGTGTAGATCGGAAGAGCGGTTTCAG      |
| chr7  | 81335553  | 81335592  | HGF_3502   | - | GTGACCTATGCACCAGACGTTTGAAGATTTTGTATTTTTCACCTGGACAAGAATTGTTGAGATCGGAAGAGCGGTTTCAG      |
| chr7  | 81336556  | 81336595  | HGF_3503   | - | GTGACCTATGCACCAGACGTTTAAAATAGTATATTTTGTAGCCTTTAAAATGTGTATGAGATCGGAAGAGCGGTTTCAG       |
| chr7  | 81339413  | 81339452  | HGF_3504   | - | GTGACCTATGCACCAGACGTATAGTGAAGTCAAGTCAATCATGATCCAGAATATGTACAAGAGAAGATCGGAAGAGCGGTTTCAG |
| chr7  | 81340747  | 81340786  | HGF_3505   | - | GTGACCTATGCACCAGACGTTTTCACAATAAAGTATATTCTGAGTCTCTCTGTGTGAGATCGGAAGAGCGGTTTCAG         |
| chr7  | 81346498  | 81346537  | HGF_3506   | - | GTGACCTATGCACCAGACGTTTAGGGATTGGTGTCTGTGAAATATTTAAAATGTACTACAGATCGGAAGAGCGGTTTCAG      |
| chr7  | 81350011  | 81350050  | HGF_3507   | - | GTGACCTATGCACCAGACGTTTCTCCTTTCAATATATAGAATGTAGTGATACCAACAGAAAGATCGGAAGAGCGGTTTCAG     |
| chr7  | 81355156  | 81355195  | HGF_3508   | - | GTGACCTATGCACCAGACGTACATTCTGCAGGGTGGGCATGATTAATTCAGGGGAAATGAGATCGGAAGAGCGGTTTCAG      |
| chr7  | 81358871  | 81358910  | HGF_3509   | - | GTGACCTATGCACCAGACGTTAGGCAATTTATACATTTTTCAGTAGCCCTGGGGAAAATGAGATCGGAAGAGCGGTTTCAG     |
| chr7  | 81372208  | 81372247  | HGF_3510   | - | GTGACCTATGCACCAGACGTCAACTGATGGTGAACCTTCTTGTGTGAGTGACAGAGGCTGAGATCGGAAGAGCGGTTTCAG     |
| chr7  | 81372619  | 81372658  | HGF_3511   | - | GTGACCTATGCACCAGACGTGCAAAATTTATGCTTCTTTTCTCTCACAGACTGGATCAGATCGGAAGAGCGGTTTCAG        |
| chr7  | 81374266  | 81374305  | HGF_3512   | - | GTGACCTATGCACCAGACGTAATGAATCATGCTTTTTCAGTATTCTTTTACAACATATATAGATCGGAAGAGCGGTTTCAG     |
| chr7  | 81381378  | 81381417  | HGF_3513   | - | GTGACCTATGCACCAGACGTCATGTGGGCCATCTATTCCCCCTATGTGTAGAATGTAAAGATCGGAAGAGCGGTTTCAG       |
| chr7  | 81381386  | 81381425  | HGF_3514   | - | GTGACCTATGCACCAGACGTCATGTAATGCCATGTGGGCCATCTATTCCCCCTATGTGTAGATCGGAAGAGCGGTTTCAG      |
| chr7  | 81386455  | 81386494  | HGF_3515   | - | GTGACCTATGCACCAGACGTTTGAAGAAAAGAGATGAAGCCCTCTGTCTTTTTTACATGTAGATCGGAAGAGCGGTTTCAG     |
| chr7  | 81387958  | 81387997  | HGF_3516   | - | GTGACCTATGCACCAGACGTTCTCCCTAAATATTGCATAATGAAATAAAGTATAATGAAAAGATCGGAAGAGCGGTTTCAG     |
| chr7  | 81391973  | 81392012  | HGF_3517   | - | GTGACCTATGCACCAGACGTTTCATTTTCTTCTTGAATAATTTTCCAAATATAGCATGCAAGATCGGAAGAGCGGTTTCAG     |
| chr7  | 81399150  | 81399189  | HGF_3518   | - | GTGACCTATGCACCAGACGTTTCTTCTTCTTCAATATAGTATTAGTATTTAACTCTCTAGATCGGAAGAGCGGTTTCAG       |
| chr12 | 68551643  | 68551682  | IFNG_3519  | - | GTGACCTATGCACCAGACGTTTAAATCTTTTCTTTGGTTTCATTGCCGAGGGTCTTGCAAAGATCGGAAGAGCGGTTTCAG     |
| chr12 | 68551921  | 68551960  | IFNG_3520  | - | GTGACCTATGCACCAGACGTTATCCCATTTGGCTAAATTTCTGTGCTTCTTCTGAAGATCGGAAGAGCGGTTTCAG          |
| chr12 | 68553232  | 68553271  | IFNG_3521  | - | GTGACCTATGCACCAGACGTTTCTTTAATAGTACTTGTGTTGTGTTGAAAATGACTGAATAGATCGGAAGAGCGGTTTCAG     |
| chr6  | 160412166 | 160412205 | IGF2R_3522 | - | GTGACCTATGCACCAGACGTAGAAAAACAACCTGTCAATGTCACCTGATTTATCAAAAATTAGATCGGAAGAGCGGTTTCAG    |
| chr6  | 160429992 | 160430031 | IGF2R_3523 | - | GTGACCTATGCACCAGACGTAGAAAAGAGAGTGAACAGGCTATAAAAACATACATAACCAAGATCGGAAGAGCGGTTTCAG     |
| chr6  | 160431669 | 160431708 | IGF2R_3524 | - | GTGACCTATGCACCAGACGTAAATAGTAATTATAATGTTACCATACCACACATTTGTAAGATCGGAAGAGCGGTTTCAG       |
| chr6  | 160445554 | 160445593 | IGF2R_3525 | - | GTGACCTATGCACCAGACGTGGAAGAAAAGTGTAGTCTTTCAGTATACCTTTGGTCAATAGATCGGAAGAGCGGTTTCAG      |
| chr6  | 160448167 | 160448206 | IGF2R_3526 | - | GTGACCTATGCACCAGACGTTGATTAATCACTTAACTAGATTAGGTTAGGAGTGATAATAGATCGGAAGAGCGGTTTCAG      |
| chr6  | 160450532 | 160450571 | IGF2R_3527 | - | GTGACCTATGCACCAGACGTCACATTGAGAAAAGAGTATTACAAAAGTATAAAGTACATCAGATCGGAAGAGCGGTTTCAG     |
| chr6  | 160453533 | 160453572 | IGF2R_3528 | - | GTGACCTATGCACCAGACGTCATGTGAAAGAAGCAAAAATAAATGTTTCATGCAGCTAGATCGGAAGAGCGGTTTCAG        |
| chr6  | 160453924 | 160453963 | IGF2R_3529 | - | GTGACCTATGCACCAGACGTGGAATTAACAAGAAGAGGCTTGTGTTTATATGAATAGGTAAGATCGGAAGAGCGGTTTCAG     |
| chr6  | 160455401 | 160455440 | IGF2R_3530 | - | GTGACCTATGCACCAGACGTGTGAATACACAGACAAATGTGTTTGGGAGAACCAAGAAAAGATCGGAAGAGCGGTTTCAG      |
| chr6  | 160461542 | 160461581 | IGF2R_3531 | - | GTGACCTATGCACCAGACGTCAAGAGGAGAAATTTAACTCCATACGTCACCAAAATTTGAAGATCGGAAGAGCGGTTTCAG     |
| chr6  | 160464130 | 160464169 | IGF2R_3532 | - | GTGACCTATGCACCAGACGTACAAAAGTATTTTATGCCAAAAGCAATGCTGATTTCTAGATCGGAAGAGCGGTTTCAG        |
| chr6  | 160465496 | 160465535 | IGF2R_3533 | - | GTGACCTATGCACCAGACGTAAGGGGGAGAAAACAGAAGATGTGGTTAAAATGATCATCAGATCGGAAGAGCGGTTTCAG      |
| chr6  | 160466727 | 160466766 | IGF2R_3534 | - | GTGACCTATGCACCAGACGTGGAAGAGAGATGGGGATCACTAATCCGTTTCTTCTAAAAGATCGGAAGAGCGGTTTCAG       |
| chr6  | 160467480 | 160467519 | IGF2R_3535 | - | GTGACCTATGCACCAGACGTATAAAAACAATAAAGTATGGAAGGTCAGTCCGACAGTTAAGATCGGAAGAGCGGTTTCAG      |
| chr6  | 160468141 | 160468180 | IGF2R_3536 | - | GTGACCTATGCACCAGACGTCACAGTTCTCTCAGCAAAGCCTGAGGGGCGAAGACACAGATCGGAAGAGCGGTTTCAG        |
| chr6  | 160468774 | 160468813 | IGF2R_3537 | - | GTGACCTATGCACCAGACGTTGACATGCCGCGGAGGGATGGCAAAAAGCAACAGTGTAGATCGGAAGAGCGGTTTCAG        |
| chr6  | 160469357 | 160469396 | IGF2R_3538 | - | GTGACCTATGCACCAGACGTTAAAGCAAAAATGTATATGCTTTTAAAGAGCTTACACATTTTCAGATCGGAAGAGCGGTTTCAG  |

|       |           |           |            |   |                                                                                     |
|-------|-----------|-----------|------------|---|-------------------------------------------------------------------------------------|
| chr6  | 160477406 | 160477445 | IGF2R_3539 | - | GTGACCTATGCACCAGACGTAAATCCAGGGTAAAAGTCAATACAGTAACATGGAACCTGAAGATCGGAAGAGCGGTTTCAG   |
| chr6  | 160479005 | 160479044 | IGF2R_3540 | - | GTGACCTATGCACCAGACGTCAAAATGGGGAAAAAGGGGCGCATTCAAACCAATTCACAAGATCGGAAGAGCGGTTTCAG    |
| chr6  | 160479888 | 160479927 | IGF2R_3541 | - | GTGACCTATGCACCAGACGTGACGGTAAGAGCCATACAAAACAAATTTATGCCTCGTATCTAGATCGGAAGAGCGGTTTCAG  |
| chr6  | 160481529 | 160481568 | IGF2R_3542 | - | GTGACCTATGCACCAGACGTAGAAGGCCAGATTTAAGAGACAGAACAGTATTCATGGCAGATCGGAAGAGCGGTTTCAG     |
| chr6  | 160482485 | 160482524 | IGF2R_3543 | - | GTGACCTATGCACCAGACGTACAAAAAACACCGCTGGAGAATCTGCCTCCTTGTGAGCAAGATCGGAAGAGCGGTTTCAG    |
| chr6  | 160482735 | 160482774 | IGF2R_3544 | - | GTGACCTATGCACCAGACGTAGAATAAGTGGTTTGGGCATGAGGAAGCCGATGACCTTGAAGATCGGAAGAGCGGTTTCAG   |
| chr6  | 160483514 | 160483553 | IGF2R_3545 | - | GTGACCTATGCACCAGACGTAAATCAGACGCTGATTTGTTTCTGATTTTAAATAATAGATCGGAAGAGCGGTTTCAG       |
| chr6  | 160484397 | 160484436 | IGF2R_3546 | - | GTGACCTATGCACCAGACGTATGGAAGAAGTGAAGGGCAACTGCAACCACACACGCATTAGATCGGAAGAGCGGTTTCAG    |
| chr6  | 160485383 | 160485422 | IGF2R_3547 | - | GTGACCTATGCACCAGACGTGGAGAACATTAACAAGGTTTGGTTCCGGTCCCTAGGCTGAGATCGGAAGAGCGGTTTCAG    |
| chr6  | 160485786 | 160485825 | IGF2R_3548 | - | GTGACCTATGCACCAGACGTAAAGAGGCACATATATAAAAGTGAAGATGCAAAACTTTAGAGATCGGAAGAGCGGTTTCAG   |
| chr6  | 160489231 | 160489270 | IGF2R_3549 | - | GTGACCTATGCACCAGACGTGAAAACCCGCGAGTTAGTTAGGCTTGGTCTGTTTCTCTTAAAGATCGGAAGAGCGGTTTCAG  |
| chr6  | 160490850 | 160490889 | IGF2R_3550 | - | GTGACCTATGCACCAGACGTAGACACAAGAAAGATGGCTTTAGTACTCCCAGGCTAAGATCGGAAGAGCGGTTTCAG       |
| chr6  | 160492892 | 160492931 | IGF2R_3551 | - | GTGACCTATGCACCAGACGTGCACACAGACGCTGGAAGGGATCACGCAAAAACCTCAGATGAGATCGGAAGAGCGGTTTCAG  |
| chr6  | 160493747 | 160493786 | IGF2R_3552 | - | GTGACCTATGCACCAGACGTGAAGAAGATGGGGACACAGTACTCCAGGGAGCTGAGACTAGATCGGAAGAGCGGTTTCAG    |
| chr6  | 160494195 | 160494234 | IGF2R_3553 | - | GTGACCTATGCACCAGACGTAGGGAAAGGGCGGAGAAAACACATACAGACTCGATGGCCAGATCGGAAGAGCGGTTTCAG    |
| chr6  | 160494739 | 160494778 | IGF2R_3554 | - | GTGACCTATGCACCAGACGTGGAAGACTGCTTTGAGTCTACAAAAAATTTTCCATATCAGATCGGAAGAGCGGTTTCAG     |
| chr6  | 160496829 | 160496868 | IGF2R_3555 | - | GTGACCTATGCACCAGACGTAGCGAGGGCAAACAGTATTTTCAGAAATTAACCATTCCCAAGATCGGAAGAGCGGTTTCAG   |
| chr6  | 160499183 | 160499222 | IGF2R_3556 | - | GTGACCTATGCACCAGACGTGAAGAGCACGGTGCTTAAAACCCATGGCATAGGGATGAGATCGGAAGAGCGGTTTCAG      |
| chr6  | 160500562 | 160500601 | IGF2R_3557 | - | GTGACCTATGCACCAGACGTACCATGCGTGGCCGTCAGCAGAGTGGCAGCACCCAGGCTAGATCGGAAGAGCGGTTTCAG    |
| chr6  | 160501111 | 160501150 | IGF2R_3558 | - | GTGACCTATGCACCAGACGTGAAGAACATTATCAGTGTGGCAGCTGTGCCTCGCCAGGCAAGATCGGAAGAGCGGTTTCAG   |
| chr6  | 160505977 | 160506016 | IGF2R_3559 | - | GTGACCTATGCACCAGACGTACACAAAGGGCAGGTAAGAGGCATGCAAGTGACGCTCTAGATCGGAAGAGCGGTTTCAG     |
| chr6  | 160509015 | 160509054 | IGF2R_3560 | - | GTGACCTATGCACCAGACGTCAAATGATTGAACTGACATTATTTCTAGTGCATTATAAAAAGATCGGAAGAGCGGTTTCAG   |
| chr6  | 160510089 | 160510128 | IGF2R_3561 | - | GTGACCTATGCACCAGACGTGGAAGCACAGGCTACAGTCACTCCCAGCCAGACATAAGAGATCGGAAGAGCGGTTTCAG     |
| chr6  | 160510898 | 160510937 | IGF2R_3562 | - | GTGACCTATGCACCAGACGTAGAAGAAGATCAGATGACATGGAAGCTTCAAGAAGGCATCGGAAGAGCGGTTTCAG        |
| chr6  | 160517421 | 160517460 | IGF2R_3563 | - | GTGACCTATGCACCAGACGTGGAAGGGCACACATGGCATGTACCATCATTTTTTACGAGAGATCGGAAGAGCGGTTTCAG    |
| chr6  | 160523501 | 160523540 | IGF2R_3564 | - | GTGACCTATGCACCAGACGTGCACAGAAAAGGAGCCGTGTACAGGGTGGTCTGCTGCAGATCGGAAGAGCGGTTTCAG      |
| chr6  | 160524728 | 160524767 | IGF2R_3565 | - | GTGACCTATGCACCAGACGTAAAGGAGACAATAATTACTCCAGTGTAGAGAGGGCATGGGAGATCGGAAGAGCGGTTTCAG   |
| chr6  | 160525656 | 160525695 | IGF2R_3566 | - | GTGACCTATGCACCAGACGTTCAACAGCAGAGACCACGTCAGCCCCCTAAGAGACCCCATAGATCGGAAGAGCGGTTTCAG   |
| chr19 | 7117017   | 7117056   | INSR_3567  | - | GTGACCTATGCACCAGACGTGTGGCGGGGGCGGCGAGGGTCCCATTTTCGTTTCTAGATCGGAAGAGCGGTTTCAG        |
| chr19 | 7119410   | 7119449   | INSR_3568  | - | GTGACCTATGCACCAGACGTAAAGGGTTTAAAGTGTGTGAGGTGTTGTTGTTGAAAGGGTATAGATCGGAAGAGCGGTTTCAG |
| chr19 | 7120581   | 7120620   | INSR_3569  | - | GTGACCTATGCACCAGACGTTGTGGATGGGTGGATGGACGCTGGGCTTGAATTCAGGTGAGATCGGAAGAGCGGTTTCAG    |
| chr19 | 7122575   | 7122614   | INSR_3570  | - | GTGACCTATGCACCAGACGCTTTTCTGCTTTGAAAACATAACGACCAGGCCAGGTTTGAAGATCGGAAGAGCGGTTTCAG    |
| chr19 | 7122840   | 7122879   | INSR_3571  | - | GTGACCTATGCACCAGACGTTCCGGGGACCCAGCGGGGTACTCGGTGGAGCACCCGCTCCAGATCGGAAGAGCGGTTTCAG   |
| chr19 | 7125244   | 7125283   | INSR_3572  | - | GTGACCTATGCACCAGACGTTGGGGTGGGACATGGGCTGGCTTCCCTGACCTTCCCTTAGATCGGAAGAGCGGTTTCAG     |
| chr19 | 7126545   | 7126584   | INSR_3573  | - | GTGACCTATGCACCAGACGTTCCCTTCCCTGTGGTGGCCAGAACCCCTACTCATCAGCTTAGATCGGAAGAGCGGTTTCAG   |
| chr19 | 7132119   | 7132158   | INSR_3574  | - | GTGACCTATGCACCAGACGTATGGCAGCCTCAGCTGACTGGGGCTGTGCTTAGCACTGAGAGATCGGAAGAGCGGTTTCAG   |
| chr19 | 7141638   | 7141677   | INSR_3575  | - | GTGACCTATGCACCAGACGTTGACTCTTGGGCATGCCCTGCACACTTACAGATGCCCTAGATCGGAAGAGCGGTTTCAG     |
| chr19 | 7142777   | 7142816   | INSR_3576  | - | GTGACCTATGCACCAGACGTTGCTCCGGGGTCCGAGTGTGATGGTGGGACATCAAGGCTAGATCGGAAGAGCGGTTTCAG    |
| chr19 | 7150458   | 7150497   | INSR_3577  | - | GTGACCTATGCACCAGACGTCCTGTGCGACCCCTGGTGCCTGCTCCGCGCAGGGCCGGCAGATCGGAAGAGCGGTTTCAG    |
| chr19 | 7152687   | 7152726   | INSR_3578  | - | GTGACCTATGCACCAGACGTGGCGCTGGGCTCTTGTGGTGGCAATTGGCTTGGTGTAGATCGGAAGAGCGGTTTCAG       |
| chr19 | 7162993   | 7163032   | INSR_3579  | - | GTGACCTATGCACCAGACGTGACGCTGGCTAGGATCGGTGGGGTTTGCACACGTGTGATCGGAAGAGCGGTTTCAG        |
| chr19 | 7166115   | 7166154   | INSR_3580  | - | GTGACCTATGCACCAGACGTTTGGGAATGTGAATTCGATGTGAATCAGACCTCTTGTAGATCGGAAGAGCGGTTTCAG      |
| chr19 | 7167929   | 7167968   | INSR_3581  | - | GTGACCTATGCACCAGACGTGAGTTAGAGAGACGCTGAGGAGGCGAGGGCTGGCTGGCTCAGATCGGAAGAGCGGTTTCAG   |
| chr19 | 7172251   | 7172290   | INSR_3582  | - | GTGACCTATGCACCAGACGCTGATTGTGTGATGGCCTGAGTGCTAACTAGGAAGTTTCAGATCGGAAGAGCGGTTTCAG     |
| chr19 | 7174544   | 7174583   | INSR_3583  | - | GTGACCTATGCACCAGACGTTCTGTGGCGGCTGGGGGTCCTGTTGGGCTCCATGCCCAGATCGGAAGAGCGGTTTCAG      |
| chr19 | 7184277   | 7184316   | INSR_3584  | - | GTGACCTATGCACCAGACGTGATGTGGTCTGGGGGCGAGGAGGAGAGGAACTGAGATCGGAAGAGCGGTTTCAG          |
| chr19 | 7267306   | 7267345   | INSR_3585  | - | GTGACCTATGCACCAGACGTGATACAGGGTTCTAAGCAGTGTCTCGTGCCTTGTCTAGAAGATCGGAAGAGCGGTTTCAG    |
| chr19 | 7293753   | 7293792   | INSR_3586  | - | GTGACCTATGCACCAGACGTGGGCGCGGGCGTGGGCGGGGAGCGCCGCGATGGGAGAGGAGATCGGAAGAGCGGTTTCAG    |
| chr19 | 7267582   | 7267621   | INSR_3587  | - | GTGACCTATGCACCAGACGTGGAACCTCGGCCTCTACAACCTGATGAACATCACCCGGGGTAGATCGGAAGAGCGGTTTCAG  |
| chr10 | 3821681   | 3821720   | KLF6_3588  | - | GTGACCTATGCACCAGACGTAGGTGGATCCTGTAGGCTAAAAGGCTTCCAGGCTGAGAGCAGATCGGAAGAGCGGTTTCAG   |
| chr10 | 3822248   | 3822287   | KLF6_3589  | - | GTGACCTATGCACCAGACGTGAGGACAATGCTGGGCAAGGAGCGTGGGGCTTGGGAATGAGATCGGAAGAGCGGTTTCAG    |
| chr10 | 3823783   | 3823822   | KLF6_3590  | - | GTGACCTATGCACCAGACGTACGCGCCGCGGAGGAGGCGGCTGGTGGGCGCCACTCGAGATCGGAAGAGCGGTTTCAG      |
| chr10 | 3824070   | 3824109   | KLF6_3591  | - | GTGACCTATGCACCAGACGTTTGGTCACTCGGGAAAATTGAGCTCCTCTGTACCTCCAAGATCGGAAGAGCGGTTTCAG     |
| chr1  | 43803470  | 43803509  | MPL_3592   | - | GTGACCTATGCACCAGACGTACTGTGTGCTGCCTTAGCCCATCTCCCTTCCAGGAAGCTAGATCGGAAGAGCGGTTTCAG    |
| chr1  | 43803720  | 43803759  | MPL_3593   | - | GTGACCTATGCACCAGACGTGCTGTGTGAGTTGGCCCTGGGCTCCAGGCATGTTTATGAGATCGGAAGAGCGGTTTCAG     |
| chr1  | 43804163  | 43804202  | MPL_3594   | - | GTGACCTATGCACCAGACGTAGAAGAGGTTCCCTCTACACAGCCACCATGCGGAGCCCTGAGATCGGAAGAGCGGTTTCAG   |
| chr1  | 43804892  | 43804931  | MPL_3595   | - | GTGACCTATGCACCAGACGTGACAGGGCACATCGAACTGAGTACCACAGTCTAGGACATCGGAAGAGCGGTTTCAG        |
| chr1  | 43805585  | 43805624  | MPL_3596   | - | GTGACCTATGCACCAGACGTTAAATCCCAGCTTCAACTAGGTTCTGCCTGTGAGATCGGAAGAGCGGTTTCAG           |

|       |           |           |             |   |                                                                                      |
|-------|-----------|-----------|-------------|---|--------------------------------------------------------------------------------------|
| chr1  | 43806008  | 43806047  | MPL_3597    | - | GTGACCTATGCACCAGACGTAGAAGTAAGTCCCATCAGGGCCCGTGTGCCCTACTGTATAGATCGGAAGAGCGGTTTCAG     |
| chr1  | 43812066  | 43812105  | MPL_3598    | - | GTGACCTATGCACCAGACGTGCCCCACAGAGTCATTGAATCAGGCCTGCCCCAGAGACTAAGATCGGAAGAGCGGTTTCAG    |
| chr1  | 43812413  | 43812452  | MPL_3599    | - | GTGACCTATGCACCAGACGTGTCAGCAGGGAGCAGCTTAAGTCCTTCTGTGCACAAGGCAAGATCGGAAGAGCGGTTTCAG    |
| chr1  | 43814464  | 43814503  | MPL_3600    | - | GTGACCTATGCACCAGACGTAAGCGTGCGGTGGCCCGCGTGGGGCTTCGATAGCCCAGAGATCGGAAGAGCGGTTTCAG      |
| chr1  | 43814884  | 43814923  | MPL_3601    | - | GTGACCTATGCACCAGACGTAAAGGGTCAGACTTCGGCCACCCTGGCCGGAGCCCCGAGATCGGAAGAGCGGTTTCAG       |
| chr1  | 43817837  | 43817876  | MPL_3602    | - | GTGACCTATGCACCAGACGTAGGAAGAGAGCAGACTGAGCCATGGCAGTGGATTGGCAGAGATCGGAAGAGCGGTTTCAG     |
| chr1  | 43818139  | 43818178  | MPL_3603    | - | GTGACCTATGCACCAGACGTGAGGAGAGGGCTGGATTAAGCAGATCCTGTGGGAGGAAGATCGGAAGAGCGGTTTCAG       |
| chr1  | 45794928  | 45794967  | MUTYH_3604  | - | GTGACCTATGCACCAGACGTAGCCCCATTCCCTGAGAATCCTGTTGTTAGTAAAGTGCTAGATCGGAAGAGCGGTTTCAG     |
| chr1  | 45796138  | 45796177  | MUTYH_3605  | - | GTGACCTATGCACCAGACGTTAGGCCCTCTCCCAACCGTGTCTCCCAGGCCTGAGTCCATAGATCGGAAGAGCGGTTTCAG    |
| chr1  | 45796804  | 45796843  | MUTYH_3606  | - | GTGACCTATGCACCAGACGTTGTTGTCTTTGTTGACTTCTTGTGTTTTCTACATGTTCCAGATCGGAAGAGCGGTTTCAG     |
| chr1  | 45797042  | 45797081  | MUTYH_3607  | - | GTGACCTATGCACCAGACGTAGCCGAATAGCCAAGGATGTTGGCTTTTGAGGCTATATCCAGATCGGAAGAGCGGTTTCAG    |
| chr1  | 45797283  | 45797322  | MUTYH_3608  | - | GTGACCTATGCACCAGACGTACTGGCGTGGAGGGCAGTGGCATGAGTAAACAAGAGAGAAAGATCGGAAGAGCGGTTTCAG    |
| chr1  | 45797645  | 45797684  | MUTYH_3609  | - | GTGACCTATGCACCAGACGTAACTAGCCCCACCCCAACCCCTTCTGGCCCGAGTCAGAAAAGATCGGAAGAGCGGTTTCAG    |
| chr1  | 45797788  | 45797827  | MUTYH_3610  | - | GTGACCTATGCACCAGACGTTGGGGAAGGGGACAGTGAGAAGTCTAAGGAGTGACTCTGCAGATCGGAAGAGCGGTTTCAG    |
| chr1  | 45798013  | 45798052  | MUTYH_3611  | - | GTGACCTATGCACCAGACGTGGGGTAACAAGGGTGTCTCAGGGGTGTCTGCAAAGGAGCTAGATCGGAAGAGCGGTTTCAG    |
| chr1  | 45798196  | 45798235  | MUTYH_3612  | - | GTGACCTATGCACCAGACGTAGCCCAACCCCACTTTGTGCGTGCCAGCCTCCTTCTCCAGATCGGAAGAGCGGTTTCAG      |
| chr1  | 45798385  | 45798424  | MUTYH_3613  | - | GTGACCTATGCACCAGACGTGGCAGGAGGGTAGGAACCCAGGAGTCTTGGGTGTCTTATAAGATCGGAAGAGCGGTTTCAG    |
| chr1  | 45798540  | 45798579  | MUTYH_3614  | - | GTGACCTATGCACCAGACGTCCCTAGGGTAGGGGAATAGGAACAAATAGAGGGACTGACGAGATCGGAAGAGCGGTTTCAG    |
| chr1  | 45798719  | 45798758  | MUTYH_3615  | - | GTGACCTATGCACCAGACGTGGGAGGAAGGGGAGGTCATGGGTCAGACCCAGATGAGAAGATCGGAAGAGCGGTTTCAG      |
| chr1  | 45798907  | 45798946  | MUTYH_3616  | - | GTGACCTATGCACCAGACGTCTCCTGAGAGCAGGGCCACTTTGCCTCGAGGCCCTTGGGTAGATCGGAAGAGCGGTTTCAG    |
| chr1  | 45799035  | 45799074  | MUTYH_3617  | - | GTGACCTATGCACCAGACGTGAGGAGCAGGGACAGTGGGTGGGAGGCAGGCACCCAGCCAGATCGGAAGAGCGGTTTCAG     |
| chr1  | 45800013  | 45800052  | MUTYH_3618  | - | GTGACCTATGCACCAGACGTAGGTTGTGGCCCAAGGCTCATTGGCCATGAAAGGCAGATTAGATCGGAAGAGCGGTTTCAG    |
| chr1  | 45805841  | 45805880  | MUTYH_3619  | - | GTGACCTATGCACCAGACGTTTGGGTCCTCTCGCCCGGTTCCAGGCAGTCGGGAAGATCGGAAGAGCGGTTTCAG          |
| chr1  | 40362994  | 40363033  | MYCL1_3620  | - | GTGACCTATGCACCAGACGTGACGTTCTGCTTACGAAGACCAAGTTTATTTAGATCGGAAGAGCGGTTTCAG             |
| chr1  | 40366436  | 40366475  | MYCL1_3621  | - | GTGACCTATGCACCAGACGTGTAGTCCCCAACCGTGTCTGTCTGGCACGTGGGTGTGTTGAGATCGGAAGAGCGGTTTCAG    |
| chr1  | 40366561  | 40366600  | MYCL1_3622  | - | GTGACCTATGCACCAGACGTCCCCGAGCCATCCAAGAGGGGGCCACCCATGGGTGGCCAAGATCGGAAGAGCGGTTTCAG     |
| chr1  | 40363293  | 40363332  | MYCL1_3623  | - | GTGACCTATGCACCAGACGTCCCCAACCTGTGACTTCTGATACTGAGGATGTGACCAAGAGATCGGAAGAGCGGTTTCAG     |
| chr1  | 40366746  | 40366785  | MYCL1_3624  | - | GTGACCTATGCACCAGACGTGCTGTGAGGCACCGGCTCGCTCCTGGCGCGCCCGGGGAAGATCGGAAGAGCGGTTTCAG      |
| chr5  | 142658879 | 142658918 | NR3C1_3625  | - | GTGACCTATGCACCAGACGTAACAATTTGGCGCTCAAAAAATAGAAGTCAATGAGAAAAAGATCGGAAGAGCGGTTTCAG     |
| chr5  | 142661404 | 142661443 | NR3C1_3626  | - | GTGACCTATGCACCAGACGTAAGAATGGTTGCCTTAAAGAACTCGAATTAATAGCTTTTAGATCGGAAGAGCGGTTTCAG     |
| chr5  | 142662083 | 142662122 | NR3C1_3627  | - | GTGACCTATGCACCAGACGTAACATAAAGCCAATATAAGAGTTTTCTGGGACAAAGTATAGATCGGAAGAGCGGTTTCAG     |
| chr5  | 142674975 | 142675014 | NR3C1_3628  | - | GTGACCTATGCACCAGACGTACCTTTTACCTTATGTCAAAAGCATGAAATATGAAGGCAGATCGGAAGAGCGGTTTCAG      |
| chr5  | 142678183 | 142678222 | NR3C1_3629  | - | GTGACCTATGCACCAGACGTTGTGTGTCATTTTCCCTGTATTCTATAGGGTATCTTTAACCCAGATCGGAAGAGCGGTTTCAG  |
| chr5  | 142680000 | 142680039 | NR3C1_3630  | - | GTGACCTATGCACCAGACGTAACATAAAGAGCAACTATAAACCCTTTGTGTTTTCTTAGATCGGAAGAGCGGTTTCAG       |
| chr5  | 142689612 | 142689651 | NR3C1_3631  | - | GTGACCTATGCACCAGACGTTATCTGAAAGCAATTGTTTGTCTGTAGCTTATAAAAAATAGATCGGAAGAGCGGTTTCAG     |
| chr5  | 142693514 | 142693553 | NR3C1_3632  | - | GTGACCTATGCACCAGACGTTGAAGAGTTTTTTTTCTCTACTTGGTTTTCTATTCTCAAGATCGGAAGAGCGGTTTCAG      |
| chr5  | 142693517 | 142693556 | NR3C1_3633  | - | GTGACCTATGCACCAGACGTTTTTGAAGAGTTTTTTTTCTCTACTTGGTTTTCTATTCTAGATCGGAAGAGCGGTTTCAG     |
| chr5  | 142779171 | 142779210 | NR3C1_3634  | - | GTGACCTATGCACCAGACGTTGTTTTTCTGTTTTCTTAAAGAAATGGTACATTTAAGGTAGATAGATCGGAAGAGCGGTTTCAG |
| chr5  | 142779565 | 142779604 | NR3C1_3635  | - | GTGACCTATGCACCAGACGTCCCCAGTAATGTAACACTGCCCAAGTGAACACAGAAAAAGATCGGAAGAGCGGTTTCAG      |
| chr5  | 142779959 | 142779998 | NR3C1_3636  | - | GTGACCTATGCACCAGACGTGAGAAACCCCAAGATTCAGCATCCACTGCTGTCTGCAGATCGGAAGAGCGGTTTCAG        |
| chr18 | 39535207  | 39535246  | PIK3C3_3637 | - | GTGACCTATGCACCAGACGTGCAAAGTACCACCTAAGCGGGAACCTTAGGTACAGGAAAAAGATCGGAAGAGCGGTTTCAG    |
| chr18 | 39537485  | 39537524  | PIK3C3_3638 | - | GTGACCTATGCACCAGACGTAAGACCAACAATGTTTCAGACATGAATTTTTAAGCATGTAGATCGGAAGAGCGGTTTCAG     |
| chr18 | 39542404  | 39542443  | PIK3C3_3639 | - | GTGACCTATGCACCAGACGTGAAGTTAACATAAATCAGAAATACATATATATATCTTTAGATCGGAAGAGCGGTTTCAG      |
| chr18 | 39550241  | 39550280  | PIK3C3_3640 | - | GTGACCTATGCACCAGACGTAGAGAATGTTCCAGGGTAGAAGTAAATTAATACAGTTTCATTAGATCGGAAGAGCGGTTTCAG  |
| chr18 | 39567726  | 39567765  | PIK3C3_3641 | - | GTGACCTATGCACCAGACGTAATACAATCAGCAAAATTTAATATACATCTAGTAGAAAAGATCGGAAGAGCGGTTTCAG      |
| chr18 | 39570373  | 39570412  | PIK3C3_3642 | - | GTGACCTATGCACCAGACGTAAGATTTTCTGAAAAATGATTATTTTCAACATTTCTAGATCGGAAGAGCGGTTTCAG        |
| chr18 | 39575804  | 39575843  | PIK3C3_3643 | - | GTGACCTATGCACCAGACGTTTTTAAATATTGACAATGTAACACTTCAACAAAAGGAAATAGATCGGAAGAGCGGTTTCAG    |
| chr18 | 39576552  | 39576591  | PIK3C3_3644 | - | GTGACCTATGCACCAGACGTAAGAAAAAGAACTAATTTTGTCAACAATACATGTCTAAGATCGGAAGAGCGGTTTCAG       |
| chr18 | 39584270  | 39584309  | PIK3C3_3645 | - | GTGACCTATGCACCAGACGTAAATATTTAAAAATAGAAACAGCCTATTTCTGGGATAAGATCGGAAGAGCGGTTTCAG       |
| chr18 | 39593356  | 39593395  | PIK3C3_3646 | - | GTGACCTATGCACCAGACGTAAAAAAGTAAAGTAATATTAGGAAAAGAAATGCAAAATTAAGATCGGAAGAGCGGTTTCAG    |
| chr18 | 39595390  | 39595429  | PIK3C3_3647 | - | GTGACCTATGCACCAGACGTAATAAAGAGATCACTGAGATGTAATAACTCTGTCCATAAGATCGGAAGAGCGGTTTCAG      |
| chr18 | 39600552  | 39600591  | PIK3C3_3648 | - | GTGACCTATGCACCAGACGTAAAGAAATGTATTATATATCATCTACTAGTAATGATAAGATCGGAAGAGCGGTTTCAG       |
| chr18 | 39607357  | 39607396  | PIK3C3_3649 | - | GTGACCTATGCACCAGACGTGTTTGGCCATTGATGTGATGTGAAATGAACTTAGATTAGATCGGAAGAGCGGTTTCAG       |
| chr18 | 39609239  | 39609278  | PIK3C3_3650 | - | GTGACCTATGCACCAGACGTCAAAGTGAGAAAAAATAGTTCTATGTTGCGTAAATGATCTAGATCGGAAGAGCGGTTTCAG    |
| chr18 | 39613740  | 39613779  | PIK3C3_3651 | - | GTGACCTATGCACCAGACGTTCAAAAAGGATTAAAGAGTTAAAATAGAAAGATAGTTTAAAGATCGGAAGAGCGGTTTCAG    |
| chr18 | 39617606  | 39617645  | PIK3C3_3652 | - | GTGACCTATGCACCAGACGTAATAATTGATTTCAAATTTGGCCATGAATTAATGCATAAAGATCGGAAGAGCGGTTTCAG     |
| chr18 | 39618695  | 39618734  | PIK3C3_3653 | - | GTGACCTATGCACCAGACGTAAAGTAAACATATATAAGCACTGTAAAGACTGTTAAAAAGATCGGAAGAGCGGTTTCAG      |
| chr18 | 39620591  | 39620630  | PIK3C3_3654 | - | GTGACCTATGCACCAGACGTATGATGCATGCAATTAAGCATAGCTACTGGTTAAGAAATAGATCGGAAGAGCGGTTTCAG     |

|       |           |           |              |   |                                                                                           |
|-------|-----------|-----------|--------------|---|-------------------------------------------------------------------------------------------|
| chr18 | 39623647  | 39623686  | PIK3C3_3655  | - | GTGACCTATGCACCAGACGTATTATTACATGTTTTAGAATTAAGTACAACAACAAACAGATCGGAAGAGCGGTTTCAG            |
| chr18 | 39629445  | 39629484  | PIK3C3_3656  | - | GTGACCTATGCACCAGACGTAGTTAAAAAAAATATGTGAAAAACAATGCAAAACCAGGTTAAGATCGGAAGAGCGGTTTCAG        |
| chr18 | 39637797  | 39637836  | PIK3C3_3657  | - | GTGACCTATGCACCAGACGTACAAGAACTCATTTGTTTCCAGAATTATCTTAAAGAACTAGATCGGAAGAGCGGTTTCAG          |
| chr18 | 39644654  | 39644693  | PIK3C3_3658  | - | GTGACCTATGCACCAGACGTGCAGAAAAGAAAAAATAGCAACGATTAAGAATTCTGCATAGATCGGAAGAGCGGTTTCAG          |
| chr18 | 39647302  | 39647341  | PIK3C3_3659  | - | GTGACCTATGCACCAGACGTACTCTTAGTCTTTACAACGAAGAAAAATAGGGCACATTAGATCGGAAGAGCGGTTTCAG           |
| chr18 | 39661037  | 39661076  | PIK3C3_3660  | - | GTGACCTATGCACCAGACGTAAAAAAGAAATAAACAGAAAATTTACTTAATTATTCAAGATCGGAAGAGCGGTTTCAG            |
| chr1  | 9770464   | 9770503   | PIK3CD_3661  | - | GTGACCTATGCACCAGACGTACTTCCAGATGACAGTTGTCCATAAAATGAAGAAATGGAGATCGGAAGAGCGGTTTCAG           |
| chr1  | 9775549   | 9775588   | PIK3CD_3662  | - | GTGACCTATGCACCAGACGTAGTACCCTGTCAGCCCTCCACCAAGGCAGCCACTGGGAAGATCGGAAGAGCGGTTTCAG           |
| chr1  | 9775857   | 9775896   | PIK3CD_3663  | - | GTGACCTATGCACCAGACGTGGGAGGGCTGGGTGAGCGGGTGGGGCAGGCAGGGCCAGCCAGATCGGAAGAGCGGTTTCAG         |
| chr1  | 9776448   | 9776487   | PIK3CD_3664  | - | GTGACCTATGCACCAGACGTGAGGGAGGTACGTCTCTGCCCTCGAGGCCCCCGGGGTTAGATCGGAAGAGCGGTTTCAG           |
| chr1  | 9776967   | 9777006   | PIK3CD_3665  | - | GTGACCTATGCACCAGACGTGTGCAGGGTGAAGCGGCTGGTGGGGCGGCCCAACCACTCCAGATCGGAAGAGCGGTTTCAG         |
| chr1  | 9777545   | 9777584   | PIK3CD_3666  | - | GTGACCTATGCACCAGACGTGGGAAGCAGGGCTGTTAACACGGCTCAAAGTGCAGCTTGATAGATCGGAAGAGCGGTTTCAG        |
| chr1  | 9778702   | 9778741   | PIK3CD_3667  | - | GTGACCTATGCACCAGACGTGGCCGGATGATGGGTGAGGAGGCAGAGGCCAGCCCTCAGATCGGAAGAGCGGTTTCAG            |
| chr1  | 9779929   | 9779968   | PIK3CD_3668  | - | GTGACCTATGCACCAGACGTACAGGGCAGGTGAGGACAGCCACTCAGGGGCTCCAGACCAGATCGGAAGAGCGGTTTCAG          |
| chr1  | 9780120   | 9780159   | PIK3CD_3669  | - | GTGACCTATGCACCAGACGTGGGCAGATGAAGTTGTAGAGGGTGAACAGCATCTCTGGGAGATCGGAAGAGCGGTTTCAG          |
| chr1  | 9780619   | 9780658   | PIK3CD_3670  | - | GTGACCTATGCACCAGACGTGGCTGCACCTCAGCGTCCCCAGGGGCTGGACCAGCCCGGAGATCGGAAGAGCGGTTTCAG          |
| chr1  | 9780750   | 9780789   | PIK3CD_3671  | - | GTGACCTATGCACCAGACGTGGGCAGGAGTGAAGGGCTCTGGTTCACGCGGGCTCCATGAGATCGGAAGAGCGGTTTCAG          |
| chr1  | 9781452   | 9781491   | PIK3CD_3672  | - | GTGACCTATGCACCAGACGTGGAGGGCTGGGGCTCCGACTCCCGCAGGCAGGACAGATCGGAAGAGCGGTTTCAG               |
| chr1  | 9781769   | 9781808   | PIK3CD_3673  | - | GTGACCTATGCACCAGACGTAAAGGAGGGCTGAGCCTCAGCAGGCAGCACCCAGATCGGAAGAGCGGTTTCAG                 |
| chr1  | 9781983   | 9782022   | PIK3CD_3674  | - | GTGACCTATGCACCAGACGTGATGGGAGGGCGGGTGGGCAGGTCCCAGCCTCGACCAAGATCGGAAGAGCGGTTTCAG            |
| chr1  | 9782252   | 9782291   | PIK3CD_3675  | - | GTGACCTATGCACCAGACGTAGAGAGCGGGCAGTACAGAGGGGCTCCTTACCAGCCCTCAGATCGGAAGAGCGGTTTCAG          |
| chr1  | 9782536   | 9782575   | PIK3CD_3676  | - | GTGACCTATGCACCAGACGTGGCCGGTGGGAGGAGAAGCGTGAGTTTCTGGTAGGTTCTCAGATCGGAAGAGCGGTTTCAG         |
| chr1  | 9783133   | 9783172   | PIK3CD_3677  | - | GTGACCTATGCACCAGACGTGGGAAGAGGGCAGGGCAAATGGCATGGTCAAGGGCTGCCAGATCGGAAGAGCGGTTTCAG          |
| chr1  | 9784284   | 9784323   | PIK3CD_3678  | - | GTGACCTATGCACCAGACGTGGGAGAGGGAGGGGAGATTGAGAAGGTGCAGACAGGAGAGATCGGAAGAGCGGTTTCAG           |
| chr1  | 9784812   | 9784851   | PIK3CD_3679  | - | GTGACCTATGCACCAGACGTGGGACAGAGGAAGTGAGGCTCTGGGAACTCCCAGCCACAGAGATCGGAAGAGCGGTTTCAG         |
| chr1  | 9786917   | 9786956   | PIK3CD_3680  | - | GTGACCTATGCACCAGACGTATCACAGCGGTGTCCACGTTAAGGGGGCCCGACCTTGCTAGATCGGAAGAGCGGTTTCAG          |
| chr19 | 18266640  | 18266679  | PIK3R2_3681  | - | GTGACCTATGCACCAGACGTGTGGGGTGGGGTCTGGATGGTTAGGTGGCTGCTTGGAGCCAGATCGGAAGAGCGGTTTCAG         |
| chr19 | 18271231  | 18271270  | PIK3R2_3682  | - | GTGACCTATGCACCAGACGTAAACAGGGGGGTTGCATGTTGGTGGGGTCTTGGAAAGGAGAGATCGGAAGAGCGGTTTCAG         |
| chr19 | 18271679  | 18271718  | PIK3R2_3683  | - | GTGACCTATGCACCAGACGTAGGGGACAGCGGAGTCAAGCTTCAAATGCTGCCCCAGCTAGATCGGAAGAGCGGTTTCAG          |
| chr19 | 18271814  | 18271853  | PIK3R2_3684  | - | GTGACCTATGCACCAGACGTAGGGGGGCACAGCTCCAACTCATGTACTGGGGCCCAAGATCGGAAGAGCGGTTTCAG             |
| chr19 | 18272039  | 18272078  | PIK3R2_3685  | - | GTGACCTATGCACCAGACGTATGGCCAGGGCAGGGTGAAGCAGGCTGGGGCTCCACCAAGATCGGAAGAGCGGTTTCAG           |
| chr19 | 18272726  | 18272765  | PIK3R2_3686  | - | GTGACCTATGCACCAGACGTAGGGGAGTGTGGTGAAGGCTGGGTAGGGCTGTCCGCCAAGATCGGAAGAGCGGTTTCAG           |
| chr19 | 18272962  | 18273001  | PIK3R2_3687  | - | GTGACCTATGCACCAGACGTGAAACAAATGCATCCTGAGCACCGACTGTATACTGTGGAGATCGGAAGAGCGGTTTCAG           |
| chr19 | 18273168  | 18273207  | PIK3R2_3688  | - | GTGACCTATGCACCAGACGTATCCAACATGGGACTGCCGACCCACCTGGAGACCCCGCTAGATCGGAAGAGCGGTTTCAG          |
| chr19 | 18273727  | 18273766  | PIK3R2_3689  | - | GTGACCTATGCACCAGACGTAGAGGGGTGTCCGACCTGTCGGCAGCCAGTGGACCCCGCACCTGACCCAGATCGGAAGAGCGGTTTCAG |
| chr19 | 18274023  | 18274062  | PIK3R2_3690  | - | GTGACCTATGCACCAGACGTGTGGCGGAATGAGGGGAGATGCATAGCCTGGTGGGTCTAAGATCGGAAGAGCGGTTTCAG          |
| chr19 | 18276920  | 18276959  | PIK3R2_3691  | - | GTGACCTATGCACCAGACGTGGGCAGCTCAGCACCTCTGGGACTCCCCAAAAGGCCAGATCGGAAGAGCGGTTTCAG             |
| chr19 | 18279486  | 18279525  | PIK3R2_3692  | - | GTGACCTATGCACCAGACGTGGGCGTGGCGGGGAGGGCCCTGTACTCACTGACCTGCCAGCAGATCGGAAGAGCGGTTTCAG        |
| chr19 | 18279847  | 18279886  | PIK3R2_3693  | - | GTGACCTATGCACCAGACGTAGACGAGAGGGGGAGTGGAAAGGCTGGCCCTCCCGCCAAGATCGGAAGAGCGGTTTCAG           |
| chr7  | 113517728 | 113517767 | PPP1R3A_3694 | - | GTGACCTATGCACCAGACGTACTATTCTCTTAAAAGATAAGCTATTTAAACCCAAACAAGATCGGAAGAGCGGTTTCAG           |
| chr7  | 113522044 | 113522083 | PPP1R3A_3695 | - | GTGACCTATGCACCAGACGTGGTTGGTGGCCAGGTATAGAGAAGATGAATCCATTTCTGTAGATCGGAAGAGCGGTTTCAG         |
| chr7  | 113522267 | 113522306 | PPP1R3A_3696 | - | GTGACCTATGCACCAGACGTTCATTAATTTTAAAACAAATTTGTCTCTTTTGTGAAAGTAGATCGGAAGAGCGGTTTCAG          |
| chr7  | 113558220 | 113558259 | PPP1R3A_3697 | - | GTGACCTATGCACCAGACGTATCTACATATTTATTATTACAAATCTTAAAGTTTTATAGATCGGAAGAGCGGTTTCAG            |
| chr7  | 113558611 | 113558650 | PPP1R3A_3698 | - | GTGACCTATGCACCAGACGTGTCTCTTCTGGGTCTACAAGTATCAAGGGTATTATTCGAAGATCGGAAGAGCGGTTTCAG          |
| chr7  | 113518208 | 113518247 | PPP1R3A_3699 | - | GTGACCTATGCACCAGACGTCTTATCTGAGTCTAAACCTGAAGAAGTTCCAGAAGTTTCAGATCGGAAGAGCGGTTTCAG          |
| chr7  | 113518688 | 113518727 | PPP1R3A_3700 | - | GTGACCTATGCACCAGACGTGTTGTAATGTACTGTGATGAATGAAGAAGGAGGAAATCGGAAGAGCGGTTTCAG                |
| chr7  | 113519168 | 113519207 | PPP1R3A_3701 | - | GTGACCTATGCACCAGACGTATAATAGCCACAGCATAAAACAAAGTTGGAATGTTCTGGAAGATCGGAAGAGCGGTTTCAG         |
| chr7  | 113519648 | 113519687 | PPP1R3A_3702 | - | GTGACCTATGCACCAGACGTGAGATTTCCATTAGATACGTGGCATGTCTCAAAGAATCAGATCGGAAGAGCGGTTTCAG           |
| chr11 | 111597639 | 111597678 | PPP2R1B_3703 | - | GTGACCTATGCACCAGACGTAAAAAAGAAACATAAAAAATAAAGTACCACACATATTGAGATCGGAAGAGCGGTTTCAG           |
| chr11 | 111608122 | 111608161 | PPP2R1B_3704 | - | GTGACCTATGCACCAGACGTGAAAGCCTGGGGTCAAGTCTGCCCTCAGGGCTGCGGGCAAGATCGGAAGAGCGGTTTCAG          |
| chr11 | 111612270 | 111612309 | PPP2R1B_3705 | - | GTGACCTATGCACCAGACGTGAGGAAAAGCCCTTACTAGATTCTTGACAAAATTTAGATCGGAAGAGCGGTTTCAG              |
| chr11 | 111612727 | 111612766 | PPP2R1B_3706 | - | GTGACCTATGCACCAGACGTCTTTTGGCTTTGCTTGGCTTACTGCTTGGTTAACTGGGAAGATCGGAAGAGCGGTTTCAG          |
| chr11 | 111613197 | 111613236 | PPP2R1B_3707 | - | GTGACCTATGCACCAGACGTAGTGTGTTAGTCTGTTTTAAAAGTGTACTTTAAATTTTACAGATCGGAAGAGCGGTTTCAG         |
| chr11 | 111614050 | 111614089 | PPP2R1B_3708 | - | GTGACCTATGCACCAGACGTACAACTGTTATTGCTAAGCTTAATCATTAAAGCAAATTAGATCGGAAGAGCGGTTTCAG           |
| chr11 | 111618628 | 111618667 | PPP2R1B_3709 | - | GTGACCTATGCACCAGACGTAAAAACAGATTATGAAAGCCCATATATCCATGATTTTCAAGATCGGAAGAGCGGTTTCAG          |
| chr11 | 111622833 | 111622872 | PPP2R1B_3710 | - | GTGACCTATGCACCAGACGTGTTGCTCCATGAACTGCAGGGTAGTGTGCAGATAGTGACAAAGATCGGAAGAGCGGTTTCAG        |
| chr11 | 111624117 | 111624156 | PPP2R1B_3711 | - | GTGACCTATGCACCAGACGTCTTTATGTTTCTGGCTTTGATGATAATTTGATTTTATAGATCGGAAGAGCGGTTTCAG            |
| chr11 | 111625173 | 111625212 | PPP2R1B_3712 | - | GTGACCTATGCACCAGACGTCTTTATGTTTCTTACTCTCTTTTATATGAAGGTAACCTAGATCGGAAGAGCGGTTTCAG           |



|       |           |           |              |   |                                                                                      |
|-------|-----------|-----------|--------------|---|--------------------------------------------------------------------------------------|
| chr11 | 111625654 | 111625693 | PPP2R1B_3713 | - | GTGACCTATGCACCAGACGTTCAATTTATGTTGGAACATGTGTCATTCAATTTTGGTGCATAGATCGGAAGAGCGGTTTCAG   |
| chr11 | 111625969 | 111626008 | PPP2R1B_3714 | - | GTGACCTATGCACCAGACGTCATTTTTAAAGTACTAAGGAAATAAACCTGAAAAACATAGAGATCGGAAGAGCGGTTTCAG    |
| chr11 | 111630478 | 111630517 | PPP2R1B_3715 | - | GTGACCTATGCACCAGACGTTCTTAGTATTTAAGGGACACAGATATGCTCCTTCTCTAAGATCGGAAGAGCGGTTTCAG      |
| chr11 | 111631493 | 111631532 | PPP2R1B_3716 | - | GTGACCTATGCACCAGACGTTGATTTTTTGCCTTGTAAAGCAGAAAATCAGGTAGTAAGAGATCGGAAGAGCGGTTTCAG     |
| chr11 | 111635479 | 111635518 | PPP2R1B_3717 | - | GTGACCTATGCACCAGACGTATAAGCTGCCTACCCTCCTTACAACTTTTGCAGTATAAAGATCGGAAGAGCGGTTTCAG      |
| chr11 | 111635968 | 111636007 | PPP2R1B_3718 | - | GTGACCTATGCACCAGACGTTCTTTGTTAAAGAAAGTAGGGACATTCATTTCCAGTAAGATCGGAAGAGCGGTTTCAG       |
| chr11 | 111636922 | 111636961 | PPP2R1B_3719 | - | GTGACCTATGCACCAGACGTGAGGCCGGGGACCCGAGCCGAGACCCGGTGGTCCGCTGGTAGATCGGAAGAGCGGTTTCAG    |
| chr12 | 70915219  | 70915258  | PTPRB_3720   | - | GTGACCTATGCACCAGACGTGAAGAGCTCCTGGATAAAAATTATTCACTGTGTGATTTGTAGATCGGAAGAGCGGTTTCAG    |
| chr12 | 70918201  | 70918240  | PTPRB_3721   | - | GTGACCTATGCACCAGACGTACTTCACTTACTTCCCAAGTTTCTTCATCAAGATATGGTAGATCGGAAGAGCGGTTTCAG     |
| chr12 | 70925765  | 70925804  | PTPRB_3722   | - | GTGACCTATGCACCAGACGTAGACTGAAAGTTACAGGCCACCCTCCTCCCCACTGTATTAGATCGGAAGAGCGGTTTCAG     |
| chr12 | 70928218  | 70928257  | PTPRB_3723   | - | GTGACCTATGCACCAGACGTACCTAGCAGCCAATAAAATGGCAGCCATAAGGGGGTTGTGAGATCGGAAGAGCGGTTTCAG    |
| chr12 | 70928563  | 70928602  | PTPRB_3724   | - | GTGACCTATGCACCAGACGTTTGCTTGACTTAAACAACCGAGCTGGGAGATGAATGAGAAGATCGGAAGAGCGGTTTCAG     |
| chr12 | 70929755  | 70929794  | PTPRB_3725   | - | GTGACCTATGCACCAGACGTAGCCCTTCCTGGCATCAAAGCTTTTGACTTTCTGCCACCTGGAAGATCGGAAGAGCGGTTTCAG |
| chr12 | 70931885  | 70931924  | PTPRB_3726   | - | GTGACCTATGCACCAGACGTCACTAGGCCATAGTGTTCAGGATGAGGCTTTGGTGGGTGGAGATCGGAAGAGCGGTTTCAG    |
| chr12 | 70932654  | 70932693  | PTPRB_3727   | - | GTGACCTATGCACCAGACGTTGTCAAATTTGTAATACTGTCTTCTCTAGCCATTTCTGAGATCGGAAGAGCGGTTTCAG      |
| chr12 | 70933355  | 70933394  | PTPRB_3728   | - | GTGACCTATGCACCAGACGTGGCAGAATGAAGCTTCAGCATCCCTAGTTCTTAGCAGAAATAGATCGGAAGAGCGGTTTCAG   |
| chr12 | 70933557  | 70933596  | PTPRB_3729   | - | GTGACCTATGCACCAGACGTGAACACATTAATCTATATTTACTGCTTTGAAATATGAAGATCGGAAGAGCGGTTTCAG       |
| chr12 | 70933669  | 70933708  | PTPRB_3730   | - | GTGACCTATGCACCAGACGTGACCTTCTGATAATTTGTTGAAAGATGGTATTATGTAGATCGGAAGAGCGGTTTCAG        |
| chr12 | 70934588  | 70934627  | PTPRB_3731   | - | GTGACCTATGCACCAGACGTAGATCCTTTTGTTGGTAGTGACCACAACCTTTAAAAATGCAAGATCGGAAGAGCGGTTTCAG   |
| chr12 | 70938287  | 70938326  | PTPRB_3732   | - | GTGACCTATGCACCAGACGTCTTTACATCATGTTCTACCAACTGCCATGTCACCTACAAAGATCGGAAGAGCGGTTTCAG     |
| chr12 | 70946507  | 70946546  | PTPRB_3733   | - | GTGACCTATGCACCAGACGTTTACCACGTGTTTTGCTAGAAGGGACATGCTACATTACTAAAGATCGGAAGAGCGGTTTCAG   |
| chr12 | 70948890  | 70948929  | PTPRB_3734   | - | GTGACCTATGCACCAGACGTATGAGTTAACTCCACTCTGAGACACAGAATGCTTCTCAAGATCGGAAGAGCGGTTTCAG      |
| chr12 | 70949600  | 70949639  | PTPRB_3735   | - | GTGACCTATGCACCAGACGTGAGGCTGCGCACAGACAGCCCTCTGCACTGGAGTGAAGGAGATCGGAAGAGCGGTTTCAG     |
| chr12 | 70953073  | 70953112  | PTPRB_3736   | - | GTGACCTATGCACCAGACGTTTTTGCTACTCTTATTTCTCAAATGGAGTAGAGGAAGTATAGCTCGGAAGAGCGGTTTCAG    |
| chr12 | 70954401  | 70954440  | PTPRB_3737   | - | GTGACCTATGCACCAGACGTGAGGTGCCAATGGCCAAGGGATGGTGGGAAGTAGCTTCCAAGATCGGAAGAGCGGTTTCAG    |
| chr12 | 70956574  | 70956613  | PTPRB_3738   | - | GTGACCTATGCACCAGACGTGACCCAAGCAGTAATGAATCGTGGGGGAATGTCCCGGTAAAGATCGGAAGAGCGGTTTCAG    |
| chr12 | 70960165  | 70960204  | PTPRB_3739   | - | GTGACCTATGCACCAGACGTGAGCATAATGTTTTGTAGCACAATTTGCCAATGTCTGTGTAAGATCGGAAGAGCGGTTTCAG   |
| chr12 | 70963405  | 70963444  | PTPRB_3740   | - | GTGACCTATGCACCAGACGTACCTGGAGAAGGCTAGATTGTAGAATGCCCTCATGGTTCTAGATCGGAAGAGCGGTTTCAG    |
| chr12 | 70964756  | 70964795  | PTPRB_3741   | - | GTGACCTATGCACCAGACGTATACTGTTCTTGAACCTGAATAGATGCAGTGGTGCATTTAAGATCGGAAGAGCGGTTTCAG    |
| chr12 | 70965554  | 70965593  | PTPRB_3742   | - | GTGACCTATGCACCAGACGTGATTTGCAAATCTGACAGTTGGTTGGACTTGAAGTCTCAGATCGGAAGAGCGGTTTCAG      |
| chr12 | 70970112  | 70970151  | PTPRB_3743   | - | GTGACCTATGCACCAGACGTATGAAGTTTCAGGGCTCCGTAAGAACCAATTCACATGTGGAGATCGGAAGAGCGGTTTCAG    |
| chr12 | 70974766  | 70974805  | PTPRB_3744   | - | GTGACCTATGCACCAGACGTGAGATATGTGTCTGTGACTTAACTAAGATCTGAGTACATGAGATCGGAAGAGCGGTTTCAG    |
| chr12 | 70980737  | 70980776  | PTPRB_3745   | - | GTGACCTATGCACCAGACGTTTATAAATTTTACATTTTAAAGTGTCTGTCTGTGTAATTAGATCGGAAGAGCGGTTTCAG     |
| chr12 | 70983694  | 70983733  | PTPRB_3746   | - | GTGACCTATGCACCAGACGTGAAGATGTTAATCCCAATGGAAGAGTAATTTGTTCCCTAGATCGGAAGAGCGGTTTCAG      |
| chr12 | 70986012  | 70986051  | PTPRB_3747   | - | GTGACCTATGCACCAGACGTGGCTCCAGAATGTTCTTGGTTGCTGCAACTCACTCTCTGAAGATCGGAAGAGCGGTTTCAG    |
| chr12 | 70988197  | 70988236  | PTPRB_3748   | - | GTGACCTATGCACCAGACGTCTAGCTAGCTGAAGAAGAATAAAGTGAATCAAGGGAAATAGATCGGAAGAGCGGTTTCAG     |
| chr12 | 70989779  | 70989818  | PTPRB_3749   | - | GTGACCTATGCACCAGACGTTTTATTTTATAGCTGAGTAGTTAATAGGATACTTTTCAAGAGATCGGAAGAGCGGTTTCAG    |
| chr12 | 71002799  | 71002838  | PTPRB_3750   | - | GTGACCTATGCACCAGACGTACAGGTGCAATGGATGGCCAAGCCACACGGGGTTGGCCAGATCGGAAGAGCGGTTTCAG      |
| chr12 | 71003491  | 71003530  | PTPRB_3751   | - | GTGACCTATGCACCAGACGTGAGAAGGGGTCAGAGCTGATGCGCCCCCTCCCCGCCAAAGATCGGAAGAGCGGTTTCAG      |
| chr12 | 71016120  | 71016159  | PTPRB_3752   | - | GTGACCTATGCACCAGACGTGGGGTGTGGAGTGTGGTCTGTCACGCTCAGGAGGCTAGATCGGAAGAGCGGTTTCAG        |
| chr12 | 71029401  | 71029440  | PTPRB_3753   | - | GTGACCTATGCACCAGACGTCTTTTCTAGTACAATAATCCTGAAATGCTTCTACTAAATATCAGATCGGAAGAGCGGTTTCAG  |
| chr12 | 71031071  | 71031110  | PTPRB_3754   | - | GTGACCTATGCACCAGACGTCTGCCTCAGTGTCTGAGGCAATTTCTTCAAGATCTAGCCAAGATCGGAAGAGCGGTTTCAG    |
| chr6  | 117609605 | 117609644 | ROS1_3755    | - | GTGACCTATGCACCAGACGTTGGGAAATAGAGAGTTGAGATAAACACTCTCATTCACTAGATCGGAAGAGCGGTTTCAG      |
| chr6  | 117622087 | 117622126 | ROS1_3756    | - | GTGACCTATGCACCAGACGTTTCTTCAAGATTTTCTAGTTTTCTGCTGCACTGTGAACTGAAGATCGGAAGAGCGGTTTCAG   |
| chr6  | 117629907 | 117629946 | ROS1_3757    | - | GTGACCTATGCACCAGACGTTATGTTAACATATGTAATCCCCAACAAAAACATGTGCACAGATCGGAAGAGCGGTTTCAG     |
| chr6  | 117632133 | 117632172 | ROS1_3758    | - | GTGACCTATGCACCAGACGTTCTTGGATACGGGTTATTACGGATATTGGCACAATAATAGATCGGAAGAGCGGTTTCAG      |
| chr6  | 117638256 | 117638295 | ROS1_3759    | - | GTGACCTATGCACCAGACGTGGGATCCATAATATTGGTTTCTAATGCAAATGCCCTATAAGATCGGAAGAGCGGTTTCAG     |
| chr6  | 117639301 | 117639340 | ROS1_3760    | - | GTGACCTATGCACCAGACGTAAATAATTTCTCCTGGTATGGGTAAGAAGTTTTAAGTCCGAGATCGGAAGAGCGGTTTCAG    |
| chr6  | 117640981 | 117641020 | ROS1_3761    | - | GTGACCTATGCACCAGACGTCTTTCGAACCTCTGACACATTATATCACCATATCTACAAAGATCGGAAGAGCGGTTTCAG     |
| chr6  | 117642372 | 117642411 | ROS1_3762    | - | GTGACCTATGCACCAGACGTTTGCCATCATTATGGAGCACCTAGGCAAAAGGTTGGCAAAGATCGGAAGAGCGGTTTCAG     |
| chr6  | 117645445 | 117645484 | ROS1_3763    | - | GTGACCTATGCACCAGACGTGAGATTTTTAAATAGGCAACAAACTGTTTACTTAAATCAAGATCGGAAGAGCGGTTTCAG     |
| chr6  | 117647337 | 117647376 | ROS1_3764    | - | GTGACCTATGCACCAGACGTAGTCTGTCTGACACACTGACTTATTACCTAAAAGTTTCACTAGATCGGAAGAGCGGTTTCAG   |
| chr6  | 117650442 | 117650481 | ROS1_3765    | - | GTGACCTATGCACCAGACGTTTGCAAAGTACTTTGAAATGACAAAGAACTAAGAAGATAAAGATCGGAAGAGCGGTTTCAG    |
| chr6  | 117658285 | 117658324 | ROS1_3766    | - | GTGACCTATGCACCAGACGTACATACTCAATACTCAGAAAACCTGTGTTTCAGTTTTTATAGATCGGAAGAGCGGTTTCAG    |
| chr6  | 117662248 | 117662287 | ROS1_3767    | - | GTGACCTATGCACCAGACGTTAATGCAAGTCTTTATTTTATGATAGAATAAATGGAAAAGATCGGAAGAGCGGTTTCAG      |
| chr6  | 117662513 | 117662552 | ROS1_3768    | - | GTGACCTATGCACCAGACGTTTACTAGGCACTTTTATTGTCTATTCTCAAGTGAAGGCAGATCGGAAGAGCGGTTTCAG      |
| chr6  | 117663513 | 117663552 | ROS1_3769    | - | GTGACCTATGCACCAGACGTTGGCTTTGTTGGTTCTTCAAGCAGAATATTGTGATATAGATCGGAAGAGCGGTTTCAG       |
| chr6  | 117665173 | 117665212 | ROS1_3770    | - | GTGACCTATGCACCAGACGTTAAGTGTGGTCTTTGCTTTTCCACAAGATGTTCTTTTTGAGATCGGAAGAGCGGTTTCAG     |

|       |           |           |              |   |                                                                                        |
|-------|-----------|-----------|--------------|---|----------------------------------------------------------------------------------------|
| chr6  | 117674103 | 117674142 | ROS1_3771    | - | GTGACCTATGCACCAGACGTACATTGCGTAACTAGCTTTGTTCTCCCAATTAGGGTCCAGAAGATCGGAAGAGCGGTTTCAG     |
| chr6  | 117677742 | 117677781 | ROS1_3772    | - | GTGACCTATGCACCAGACGTGATGATGTGCACAGATATTTGTTAATAAGAGCAGCCCTAGATCGGAAGAGCGGTTTCAG        |
| chr6  | 117678917 | 117678956 | ROS1_3773    | - | GTGACCTATGCACCAGACGTGCAAGTATTTTTTATATTGTGATGAAATAGATATAGACAAGATCGGAAGAGCGGTTTCAG       |
| chr6  | 117680922 | 117680961 | ROS1_3774    | - | GTGACCTATGCACCAGACGTATGTAATTCTCCGAAATAAAGGAAGTGAAGTATTGTCATAGATCGGAAGAGCGGTTTCAG       |
| chr6  | 117683716 | 117683755 | ROS1_3775    | - | GTGACCTATGCACCAGACGTGAAAACAGAAAGATAGAGAGTCTTAATAGCCGCATTGTGGAGATCGGAAGAGCGGTTTCAG      |
| chr6  | 117686173 | 117686212 | ROS1_3776    | - | GTGACCTATGCACCAGACGTAAAATCTGTCTTTTTCTTAAAAAAGCAGAATCTCACTTAGATCGGAAGAGCGGTTTCAG        |
| chr6  | 117686694 | 117686733 | ROS1_3777    | - | GTGACCTATGCACCAGACGTGGTTCTAGTAGTACCTTTTCAATTTCCCAAACAGACTGTACCTCAGATCGGAAGAGCGGTTTCAG  |
| chr6  | 117687189 | 117687228 | ROS1_3778    | - | GTGACCTATGCACCAGACGTTCATTCTGCTTACCCTACTCCACTATACCTTCAGTTAAAAGATCGGAAGAGCGGTTTCAG       |
| chr6  | 117700172 | 117700211 | ROS1_3779    | - | GTGACCTATGCACCAGACGTTCCCTCAAAGGCAATTGATTGAGAAGAAAACCTTGCAGTCAGATCGGAAGAGCGGTTTCAG      |
| chr6  | 117704430 | 117704469 | ROS1_3780    | - | GTGACCTATGCACCAGACGTAAAAGATCTGATCATTAGTAATACTGAATAGCTCTATATAGATCGGAAGAGCGGTTTCAG       |
| chr6  | 117708002 | 117708041 | ROS1_3781    | - | GTGACCTATGCACCAGACGTAGTCTCTGTTCCTCACTTGAATGACAGATTTTCTACTATAAGAGATCGGAAGAGCGGTTTCAG    |
| chr6  | 117708893 | 117708932 | ROS1_3782    | - | GTGACCTATGCACCAGACGTGTTCTGGATTTAGGGAGTGACTCTACAAAAAGAGGACTAAGATCGGAAGAGCGGTTTCAG       |
| chr6  | 117710463 | 117710502 | ROS1_3783    | - | GTGACCTATGCACCAGACGTGTGCCACAGCTGCCCTGCGCTTACTGCGCTTGTGGAATAAGAGGAAGATCGGAAGAGCGGTTTCAG |
| chr6  | 117714337 | 117714376 | ROS1_3784    | - | GTGACCTATGCACCAGACGTGCGCTTGTAAAGATGAATCTCTTCCATTGGGAATAAATAAAGATCGGAAGAGCGGTTTCAG      |
| chr6  | 117715275 | 117715314 | ROS1_3785    | - | GTGACCTATGCACCAGACGTGAAGTAAAGAGGAATAGTGATAGACAGTGATACTGATATAGATCGGAAGAGCGGTTTCAG       |
| chr6  | 117715729 | 117715768 | ROS1_3786    | - | GTGACCTATGCACCAGACGTAAAGGATAAATGATTCTTATGTTGTAAGAAAGATTTCAAAGATCGGAAGAGCGGTTTCAG       |
| chr6  | 117717301 | 117717340 | ROS1_3787    | - | GTGACCTATGCACCAGACGTGGCTTCTTCCCTTAGCTACACAGGAATGAGGGTGGCAAGGATCGGAAGAGCGGTTTCAG        |
| chr6  | 117718028 | 117718067 | ROS1_3788    | - | GTGACCTATGCACCAGACGTAGTGATACAGGAAAATGTAAACAGCATGGCTGCAGGCAAGATCGGAAGAGCGGTTTCAG        |
| chr6  | 117724252 | 117724291 | ROS1_3789    | - | GTGACCTATGCACCAGACGTACACACTTCTTATAAGAGGACATTATTTCAAAGCTTTGGAAGATCGGAAGAGCGGTTTCAG      |
| chr6  | 117730695 | 117730734 | ROS1_3790    | - | GTGACCTATGCACCAGACGTACACACGACTTTTTAAAAATAGGCTGCACCCTCTAGTGAAGATCGGAAGAGCGGTTTCAG       |
| chr6  | 117737371 | 117737410 | ROS1_3791    | - | GTGACCTATGCACCAGACGTATTAGATTCTTATTTTATGACTGATGTTTCTTTCAAAGAGGAGATCGGAAGAGCGGTTTCAG     |
| chr6  | 117739575 | 117739614 | ROS1_3792    | - | GTGACCTATGCACCAGACGTCTTCTCAGTTGTCAAGAATTTACATGTTTGTGTTGATAAAGATCGGAAGAGCGGTTTCAG       |
| chr6  | 117746647 | 117746686 | ROS1_3793    | - | GTGACCTATGCACCAGACGTCAATCTAATATTTGTCTTTGAGAGACTAGAACCTGTAGCAGATCGGAAGAGCGGTTTCAG       |
| chr6  | 166826200 | 166826239 | RPS6KA2_3794 | - | GTGACCTATGCACCAGACGTCTGCCCCAGCTGCCCTGCCAGCTCCCTCGTCCAGTCAAGATCGGAAGAGCGGTTTCAG         |
| chr6  | 166827232 | 166827271 | RPS6KA2_3795 | - | GTGACCTATGCACCAGACGTGCGACAGTGAGGACAGAGTGGTGGGAATGGGAAACCCAGAAGATCGGAAGAGCGGTTTCAG      |
| chr6  | 166831663 | 166831702 | RPS6KA2_3796 | - | GTGACCTATGCACCAGACGTGCCACAGCTTGTCTTTAAATATTCAGATTCTGAATAGCAGATCGGAAGAGCGGTTTCAG        |
| chr6  | 166833320 | 166833359 | RPS6KA2_3797 | - | GTGACCTATGCACCAGACGTACCTCAAACAGGTGTCCAGGAGGAGACACAGGGCAGCAGCCAGATCGGAAGAGCGGTTTCAG     |
| chr6  | 166836694 | 166836733 | RPS6KA2_3798 | - | GTGACCTATGCACCAGACGTCCCGACTGCCAGACCCCGCTCTATATGCCCAAAGCAGGAGATCGGAAGAGCGGTTTCAG        |
| chr6  | 166843891 | 166843930 | RPS6KA2_3799 | - | GTGACCTATGCACCAGACGTGGCTGGCGAGCCTTCCGGGAGGAGCGGCTTCAGGGCAAGATCGGAAGAGCGGTTTCAG         |
| chr6  | 166845839 | 166845878 | RPS6KA2_3800 | - | GTGACCTATGCACCAGACGTCCCGTGCAACAGCATCTCCACTTCTGTTCTTCAACAGATCGGAAGAGCGGTTTCAG           |
| chr6  | 166862162 | 166862201 | RPS6KA2_3801 | - | GTGACCTATGCACCAGACGTCTGCTGAGTGAGCAGGGCCCTGTGTGAGTGACGCGCTGAGATCGGAAGAGCGGTTTCAG        |
| chr6  | 166864541 | 166864580 | RPS6KA2_3802 | - | GTGACCTATGCACCAGACGTGGCTGACGTGGGTTGGGGGTAAGAGGGCACTTGGATGAAGATCGGAAGAGCGGTTTCAG        |
| chr6  | 166872887 | 166872926 | RPS6KA2_3803 | - | GTGACCTATGCACCAGACGTGACGTGGTCCCTCTATCGTGGCTTCTCCACCTGACCCAGATCGGAAGAGCGGTTTCAG         |
| chr6  | 166883279 | 166883318 | RPS6KA2_3804 | - | GTGACCTATGCACCAGACGTGCCACAGTCCCACCTGCACACGCTGACACAGAAGTGGAGATCGGAAGAGCGGTTTCAG         |
| chr6  | 166902271 | 166902310 | RPS6KA2_3805 | - | GTGACCTATGCACCAGACGTCCCGGACACCCACCCAGGAGCTGACAGGGCTGCCCCAGATCGGAAGAGCGGTTTCAG          |
| chr6  | 166904109 | 166904148 | RPS6KA2_3806 | - | GTGACCTATGCACCAGACGTGGGAGCCACCCAGAGACTGCGAGCACCTTCTGATATCAGATCGGAAGAGCGGTTTCAG         |
| chr6  | 166911946 | 166911985 | RPS6KA2_3807 | - | GTGACCTATGCACCAGACGTCCCGACCTCTTCTGTGCCATGGCGCTGTTCCCCACGTGAGATCGGAAGAGCGGTTTCAG        |
| chr6  | 166914325 | 166914364 | RPS6KA2_3808 | - | GTGACCTATGCACCAGACGTGACGCGCAGGCCCTCCATGGCTTCATCTCAGCCCTGGTAAGATCGGAAGAGCGGTTTCAG       |
| chr6  | 166917944 | 166917983 | RPS6KA2_3809 | - | GTGACCTATGCACCAGACGTAAAACACTAGGGCTGACTTCCCCACGCCATCAGCTCCATGAGATCGGAAGAGCGGTTTCAG      |
| chr6  | 166921641 | 166921680 | RPS6KA2_3810 | - | GTGACCTATGCACCAGACGTGCCACATCACACAGGAGGGCGGGCAGGAGCTTCTGTGAGATCGGAAGAGCGGTTTCAG         |
| chr6  | 166923715 | 166923754 | RPS6KA2_3811 | - | GTGACCTATGCACCAGACGTTCAAATGACACTTTAAAGAGGACCCAGGCAACCTTCTCAGATCGGAAGAGCGGTTTCAG        |
| chr6  | 166944670 | 166944709 | RPS6KA2_3812 | - | GTGACCTATGCACCAGACGTGCGAAGGGCCGGCTGCTTCAGAGACAGGTAACCTGCAATTTAGATCGGAAGAGCGGTTTCAG     |
| chr6  | 166952106 | 166952145 | RPS6KA2_3813 | - | GTGACCTATGCACCAGACGTCCCTGGCTGTCTTGGAGTCTATTCTTCAACACAAAGGAAGATCGGAAGAGCGGTTTCAG        |
| chr6  | 167040359 | 167040398 | RPS6KA2_3814 | - | GTGACCTATGCACCAGACGTGCCCTCGGGGCGCGCAGTGTCCGGCCTGAGCGGGCCGAGATCGGAAGAGCGGTTTCAG         |
| chr6  | 167271638 | 167271677 | RPS6KA2_3815 | - | GTGACCTATGCACCAGACGTACTGTTTTATTACACTGCTGTTTTGGGAGATTGGCCAGATCGGAAGAGCGGTTTCAG          |
| chr6  | 167275546 | 167275585 | RPS6KA2_3816 | - | GTGACCTATGCACCAGACGTGAGAGAACGCATTTTACAGACTCTCAAGATCCGAAACAGATCGGAAGAGCGGTTTCAG         |
| chr1  | 17345326  | 17345365  | SDHB_3817    | - | GTGACCTATGCACCAGACGTGCTAAACATGATTTATAACCAGCTCAGAGCTGAACATAATAGATCGGAAGAGCGGTTTCAG      |
| chr1  | 17349053  | 17349092  | SDHB_3818    | - | GTGACCTATGCACCAGACGTCTGGTGACCCTCAGCTCTGCCCTCAGAGCTGACACGCCAGAAGATCGGAAGAGCGGTTTCAG     |
| chr1  | 17350418  | 17350457  | SDHB_3819    | - | GTGACCTATGCACCAGACGTCTTAATTGCTTTAAGAGAAATTGAAACTCAAGCATCCAGAGATCGGAAGAGCGGTTTCAG       |
| chr1  | 17354194  | 17354233  | SDHB_3820    | - | GTGACCTATGCACCAGACGTCTATTTATTGTTTCAATCTGAAGAATTTATGCAAAGATAGATCGGAAGAGCGGTTTCAG        |
| chr1  | 17355045  | 17355084  | SDHB_3821    | - | GTGACCTATGCACCAGACGTGCATCTCTGTTTTGTTTTATTGTCATGGGGGCGAGTAGATCGGAAGAGCGGTTTCAG          |
| chr1  | 17359505  | 17359544  | SDHB_3822    | - | GTGACCTATGCACCAGACGTCTTCTCTGGCTCCAGATCTGTGGCTTTCCAAAGAAAGATCGGAAGAGCGGTTTCAG           |
| chr1  | 17371206  | 17371245  | SDHB_3823    | - | GTGACCTATGCACCAGACGTCTGTGAAAGCCAGCTATTGAAGGAGAGTTCTTGTATTGATAGATCGGAAGAGCGGTTTCAG      |
| chr1  | 17380393  | 17380432  | SDHB_3824    | - | GTGACCTATGCACCAGACGTGAGCCTCAGAGAGGGAAAAGTCAAGAAAACCCAGAGACTAGATCGGAAGAGCGGTTTCAG       |
| chr12 | 53774026  | 53774065  | SP1_3825     | - | GTGACCTATGCACCAGACGTGAGGGAACAAGCTCAAGGGGCTCCTGTCGGGGGGGTTGGGAGATCGGAAGAGCGGTTTCAG      |
| chr12 | 53775393  | 53775432  | SP1_3826     | - | GTGACCTATGCACCAGACGTAAAAAACAACAACGTAAACTTGAGGGAAGAAAAGAAATAGATCGGAAGAGCGGTTTCAG        |
| chr12 | 53775407  | 53775446  | SP1_3827     | - | GTGACCTATGCACCAGACGTGAGTAAAGATAAATAACAACAACGTAAACTTGAGAGATCGGAAGAGCGGTTTCAG            |
| chr12 | 53775844  | 53775883  | SP1_3828     | - | GTGACCTATGCACCAGACGTTAGGAAAGAGAAAAGAGTTAGTGACACCCAGCTGCAGAGATCGGAAGAGCGGTTTCAG         |

|       |           |           |             |   |                                                                                       |
|-------|-----------|-----------|-------------|---|---------------------------------------------------------------------------------------|
| chr12 | 53800319  | 53800358  | SP1_3829    | - | GTGACCTATGCACCAGACGTGAGAGAAAAGGTCACACATGTGACATGGGCAGGTTATCACAGATCGGAAGAGCGGTTTCAG     |
| chr12 | 53803096  | 53803135  | SP1_3830    | - | GTGACCTATGCACCAGACGTGGACACAACGTGTAATCATTACTTCTAGAGAAAACAAAGAGATCGGAAGAGCGGTTTCAG      |
| chr12 | 53804661  | 53804700  | SP1_3831    | - | GTGACCTATGCACCAGACGTGAAGAAAAGATAAGAAGCTGACATGTTAGGAAGTGAGGTTAGATCGGAAGAGCGGTTTCAG     |
| chr12 | 53776222  | 53776261  | SP1_3832    | - | GTGACCTATGCACCAGACGTGGGATTACTTGATACTGAATATTAGGCATCACTCCAGGTAAGATCGGAAGAGCGGTTTCAG     |
| chr12 | 53776600  | 53776639  | SP1_3833    | - | GTGACCTATGCACCAGACGTGTCCCTGAGGTGACAGGCTGTGAGCCACTCTCTGGGACCAGATCGGAAGAGCGGTTTCAG      |
| chr12 | 53776978  | 53777017  | SP1_3834    | - | GTGACCTATGCACCAGACGTGTTGTAGTTGTAAGGTCGCCCTGCAAAATGGTGTCTGCTTAGATCGGAAGAGCGGTTTCAG     |
| chr15 | 39874009  | 39874048  | THBS1_3835  | - | GTGACCTATGCACCAGACGTGTTGGTGCCACAGGACTCCCTGTAGCAGGAAGCACAAGAGATCGGAAGAGCGGTTTCAG       |
| chr15 | 39874344  | 39874383  | THBS1_3836  | - | GTGACCTATGCACCAGACGTGGAGAGAACAAGTGAGCTTTCTAGGCTGGGACCAGCAAGATCGGAAGAGCGGTTTCAG        |
| chr15 | 39875768  | 39875807  | THBS1_3837  | - | GTGACCTATGCACCAGACGTAGGACACACATTACTTGTAGAATGCAGAGCGGGTGGGGAAGATCGGAAGAGCGGTTTCAG      |
| chr15 | 39876139  | 39876178  | THBS1_3838  | - | GTGACCTATGCACCAGACGTACAAAATGAAAACCTTCAAATAGATACTTACCAACCAAGCAGATCGGAAGAGCGGTTTCAG     |
| chr15 | 39876451  | 39876490  | THBS1_3839  | - | GTGACCTATGCACCAGACGTGAGAATATCATAGTTGCCCCCGCATTTCAGTCATTGAGATCGGAAGAGCGGTTTCAG         |
| chr15 | 39877621  | 39877660  | THBS1_3840  | - | GTGACCTATGCACCAGACGTAGAGAGTGAGAGGGGAACAGGCTGCTGAGCATGTTGCATAAGATCGGAAGAGCGGTTTCAG     |
| chr15 | 39879498  | 39879537  | THBS1_3841  | - | GTGACCTATGCACCAGACGTAAACAGAGGTTTCATCAGGTCAGTGTGATGATTAGGACAAGCTGAGATCGGAAGAGCGGTTTCAG |
| chr15 | 39880193  | 39880232  | THBS1_3842  | - | GTGACCTATGCACCAGACGTGAGTTGATGGTCACAAATGGTTTTGGCTTAGAGACAGCCAAGATCGGAAGAGCGGTTTCAG     |
| chr15 | 39880677  | 39880716  | THBS1_3843  | - | GTGACCTATGCACCAGACGTATGAACACAGGCAACAATTAAGATCAACTTCAAATCCCAGATCGGAAGAGCGGTTTCAG       |
| chr15 | 39881110  | 39881149  | THBS1_3844  | - | GTGACCTATGCACCAGACGTGAGAGAGAGCAGTCACAGTAAATGGTTGGTCTAAGCTGCAGATCGGAAGAGCGGTTTCAG      |
| chr15 | 39881353  | 39881392  | THBS1_3845  | - | GTGACCTATGCACCAGACGTAATAAGAGCGTGCATCATGTTAGAAGTCACTGCCATAAGAGATCGGAAGAGCGGTTTCAG      |
| chr15 | 39881956  | 39881995  | THBS1_3846  | - | GTGACCTATGCACCAGACGTACCATGCTGCTGTTACACAGGCTTTTGTAGAAATCCCTCAGAAGATCGGAAGAGCGGTTTCAG   |
| chr15 | 39882667  | 39882706  | THBS1_3847  | - | GTGACCTATGCACCAGACGTGAAGATATATCACTGCTTCAGTTGCCTTCTCATGCTGAGATCGGAAGAGCGGTTTCAG        |
| chr15 | 39883342  | 39883381  | THBS1_3848  | - | GTGACCTATGCACCAGACGTAGAANAATGGAGCACTTAAACAATGTTGTCCTTGAAAACAGCAGATCGGAAGAGCGGTTTCAG   |
| chr15 | 39883656  | 39883695  | THBS1_3849  | - | GTGACCTATGCACCAGACGTCAAGGGACAATAAGAGCTGGGCTCTCCAGCCTTGATGTAGATCGGAAGAGCGGTTTCAG       |
| chr15 | 39884719  | 39884758  | THBS1_3850  | - | GTGACCTATGCACCAGACGTGATGTAATGGAGGGTAAATTCAGATATAAACCTTATGAGATCGGAAGAGCGGTTTCAG        |
| chr15 | 39885151  | 39885190  | THBS1_3851  | - | GTGACCTATGCACCAGACGTAAAAGCAAAGAGTTTCAGAAAATCTCAAAGTCTATTATTAAGATCGGAAGAGCGGTTTCAG     |
| chr15 | 39885548  | 39885587  | THBS1_3852  | - | GTGACCTATGCACCAGACGTGAGAGGAAAGAGGCTGAGTAAACCTCAGCCCTTCAGAAGGTTAGATCGGAAGAGCGGTTTCAG   |
| chr15 | 39886250  | 39886289  | THBS1_3853  | - | GTGACCTATGCACCAGACGTAGGAAAAGGAAAGGTTGAAACACAGCTCCTTCAGGTAAGAGATCGGAAGAGCGGTTTCAG      |
| chr15 | 39886452  | 39886491  | THBS1_3854  | - | GTGACCTATGCACCAGACGTAAAAAATCTTTGTTTGTAGTACAATGCTATTTAATACTTTTGTAGATCGGAAGAGCGGTTTCAG  |
| chr15 | 39887513  | 39887552  | THBS1_3855  | - | GTGACCTATGCACCAGACGTAAACAATAATAAATAATAACAAATGAAAACATAATTCAAGATCGGAAGAGCGGTTTCAG       |
| chr15 | 39874624  | 39874663  | THBS1_3856  | - | GTGACCTATGCACCAGACGTAGTGGTCTTCCGCTCCAGGGCCAGCAGCTGCCCGGGTAGATCGGAAGAGCGGTTTCAG        |
| chr1  | 3598880   | 3598919   | TP73_3857   | - | GTGACCTATGCACCAGACGTCCGGCTCCGAGGGCAGCTGCTGTCAGGAAGGAAGAAAGATCGGAAGAGCGGTTTCAG         |
| chr1  | 3599574   | 3599613   | TP73_3858   | - | GTGACCTATGCACCAGACGTGAGAGGAAAATGAAAGCAGTCCAGCTCCAGTTTTGGGTTCAAGATCGGAAGAGCGGTTTCAG    |
| chr1  | 3607420   | 3607459   | TP73_3859   | - | GTGACCTATGCACCAGACGTGGGGGGTCTGCACACGCCAGGGAAGCTGGTGTCCCGTGGAAGATCGGAAGAGCGGTTTCAG     |
| chr1  | 3624063   | 3624102   | TP73_3860   | - | GTGACCTATGCACCAGACGTAAAGGGGAGGAGGGAGGGGAAACACACAGTCAAGTCTAGATCGGAAGAGCGGTTTCAG        |
| chr1  | 3638535   | 3638574   | TP73_3861   | - | GTGACCTATGCACCAGACGTGGAGAGGGAGCGGGTGAGACCAGTGGTCCCAACTGCACCCAGATCGGAAGAGCGGTTTCAG     |
| chr1  | 3639868   | 3639907   | TP73_3862   | - | GTGACCTATGCACCAGACGTGGGTCGACATTCAGAGAGGTGCATAGAGGTGCCACCCCAAGATCGGAAGAGCGGTTTCAG      |
| chr1  | 3643629   | 3643668   | TP73_3863   | - | GTGACCTATGCACCAGACGTGGGAGCAGGGAGAGGGCTAGCATCAGCAGCCAGCCACCCAGATCGGAAGAGCGGTTTCAG      |
| chr1  | 3644142   | 3644181   | TP73_3864   | - | GTGACCTATGCACCAGACGTGGCAGACCCAGAATTGTGAGCTCAACCCTGCCACCCTCAAGATCGGAAGAGCGGTTTCAG      |
| chr1  | 3644643   | 3644682   | TP73_3865   | - | GTGACCTATGCACCAGACGTAGGCAGGGCAGGGGGTGAGCAGGCAGGACCAGAGGGTGAGATCGGAAGAGCGGTTTCAG       |
| chr1  | 3645841   | 3645880   | TP73_3866   | - | GTGACCTATGCACCAGACGTAGGAGCAGATCTCTGCCACGTGCCCCAGACCCCACGGGAGATCGGAAGAGCGGTTTCAG       |
| chr1  | 3646514   | 3646553   | TP73_3867   | - | GTGACCTATGCACCAGACGTGCAACGGCTCGCATGGGTGGGAAGCAAGGCAGCCCTCGTGCAGATCGGAAGAGCGGTTTCAG    |
| chr1  | 3647441   | 3647480   | TP73_3868   | - | GTGACCTATGCACCAGACGTGGCAGGTGGGGCCATCAGGGCAGCCAGGCTGGGCATCCAGATCGGAAGAGCGGTTTCAG       |
| chr1  | 3647977   | 3648016   | TP73_3869   | - | GTGACCTATGCACCAGACGTAATTGTGAGAAAAGAAAGCAGCATTAGCTTCCGAGCACAGGGAGATCGGAAGAGCGGTTTCAG   |
| chr1  | 3649261   | 3649300   | TP73_3870   | - | GTGACCTATGCACCAGACGTCCGGCGCATTAGGGGCGAGGGGCGAGTGAGCAGGGAGAGCAGATCGGAAGAGCGGTTTCAG     |
| chr12 | 121746233 | 121746272 | ANAPC5_3871 | - | GTGACCTATGCACCAGACGTCTGCTGGGCTGCTGTGCAGAGTATAAGATTTTGACCTTGTAGATCGGAAGAGCGGTTTCAG     |
| chr12 | 121747454 | 121747493 | ANAPC5_3872 | - | GTGACCTATGCACCAGACGTGTACGAAGACTGTTAGGCAATGCTATTCCAGAAGAAGCATTGAGATCGGAAGAGCGGTTTCAG   |
| chr12 | 121756030 | 121756069 | ANAPC5_3873 | - | GTGACCTATGCACCAGACGTCTCTGTTTTATGACACATATTTGTGCTCAAGAGCTGGTGAGATCGGAAGAGCGGTTTCAG      |
| chr12 | 121756254 | 121756293 | ANAPC5_3874 | - | GTGACCTATGCACCAGACGTCTTGTACATCTAGCAGATAGTGGTGTTGATCTTTCAAGATCGGAAGAGCGGTTTCAG         |
| chr12 | 121757450 | 121757489 | ANAPC5_3875 | - | GTGACCTATGCACCAGACGTTTTGAAAACCTTAACCCCAAGAATAAAATAATTGTTAAATGGAGATCGGAAGAGCGGTTTCAG   |
| chr12 | 121758138 | 121758177 | ANAPC5_3876 | - | GTGACCTATGCACCAGACGTTTTGTCATGGCAATAGATTTATTTCTGATAAAAATAGCTTAGATCGGAAGAGCGGTTTCAG     |
| chr12 | 121764849 | 121764888 | ANAPC5_3877 | - | GTGACCTATGCACCAGACGTGGCCGGGCCACGTGCTTCTGGAGCAATGGAGGCTCTACCAGATCGGAAGAGCGGTTTCAG      |
| chr12 | 121766069 | 121766108 | ANAPC5_3878 | - | GTGACCTATGCACCAGACGTCAAGCCCTGGGGGTGTGAATTTCTTAGAGAGAAGCAGGAAGATCGGAAGAGCGGTTTCAG      |
| chr12 | 121768336 | 121768375 | ANAPC5_3879 | - | GTGACCTATGCACCAGACGTCTTTCTGTGATAGTTTCCATAAATGGTCAGGCTTTGAGATCGGAAGAGCGGTTTCAG         |
| chr12 | 121769100 | 121769139 | ANAPC5_3880 | - | GTGACCTATGCACCAGACGTCCTCTGCTGTTGGGAGTTTTGTACAGGGTGAATTTGGCCAGATCGGAAGAGCGGTTTCAG      |
| chr12 | 121773286 | 121773325 | ANAPC5_3881 | - | GTGACCTATGCACCAGACGTAGACCTTTGTCTTGCGCAAAATGAAGGAACCGATGACAAGATCGGAAGAGCGGTTTCAG       |
| chr12 | 121775044 | 121775083 | ANAPC5_3882 | - | GTGACCTATGCACCAGACGTCCCAGAATTTGTTGCTGTGTTGAAAGGAATGACAAGGCAAGATCGGAAGAGCGGTTTCAG      |
| chr12 | 121779756 | 121779795 | ANAPC5_3883 | - | GTGACCTATGCACCAGACGTTCTGTAATTTATCATGAACCTTCTGTTCTAGTCTGTGATGAGATCGGAAGAGCGGTTTCAG     |
| chr12 | 121783592 | 121783631 | ANAPC5_3884 | - | GTGACCTATGCACCAGACGTTTTTCTGACAGGGACTTTTTCTGTAATAGTATAATTAGATCGGAAGAGCGGTTTCAG         |
| chr12 | 121784649 | 121784688 | ANAPC5_3885 | - | GTGACCTATGCACCAGACGTTTTCTTCAAGAGCAGAGATTTTTCATGAAGTGACAGATCGGAAGAGCGGTTTCAG           |
| chr12 | 121785555 | 121785594 | ANAPC5_3886 | - | GTGACCTATGCACCAGACGTTTCTTCTTTATATATGAAAAGGTGTGAAGGTAGATGAAAGATCGGAAGAGCGGTTTCAG       |

|       |           |           |            |   |                                                                                     |
|-------|-----------|-----------|------------|---|-------------------------------------------------------------------------------------|
| chr3  | 142168221 | 142168260 | ATR_3887   | - | GTGACCTATGCACCAGACGTTGTAAGAATATGTTAATAATCTAAAAGTAATGCATTTGAGATCGGAAGAGCGGTTTCAG     |
| chr3  | 142171920 | 142171959 | ATR_3888   | - | GTGACCTATGCACCAGACGTTGGTATAGCTTGATATGGGCTGTAGTCCATCTCTACAAAAGATCGGAAGAGCGGTTTCAG    |
| chr3  | 142176396 | 142176435 | ATR_3889   | - | GTGACCTATGCACCAGACGTATACTTTGTAATAATTTAACAGTAACTCGAATATAATTAGATCGGAAGAGCGGTTTCAG     |
| chr3  | 142177750 | 142177789 | ATR_3890   | - | GTGACCTATGCACCAGACGTTGAGTTACTCTTACTAATTTGTGTTTCTCTCAATTTCTTAGATCGGAAGAGCGGTTTCAG    |
| chr3  | 142180732 | 142180771 | ATR_3891   | - | GTGACCTATGCACCAGACGTTAATCTTATACATATACAGTGTGGGTAAGTTATATAAGATCGGAAGAGCGGTTTCAG       |
| chr3  | 142185116 | 142185155 | ATR_3892   | - | GTGACCTATGCACCAGACGTTTATATGACTATGATTTTAAATTTAGTTGTTAAAAAGATCGGAAGAGCGGTTTCAG        |
| chr3  | 142186726 | 142186765 | ATR_3893   | - | GTGACCTATGCACCAGACGTTAATCTTAGCTGTATAAAGTATGTTGGTAAATTATGTATAGATCGGAAGAGCGGTTTCAG    |
| chr3  | 142188129 | 142188168 | ATR_3894   | - | GTGACCTATGCACCAGACGTTCTTTTACCTTTTATATGAAAAGATCTTTTACCATTTTATAGATCGGAAGAGCGGTTTCAG   |
| chr3  | 142188878 | 142188917 | ATR_3895   | - | GTGACCTATGCACCAGACGTTACGTAAGTGTAAAGGACTAGGAATTATAACTTTGGAGATCGGAAGAGCGGTTTCAG       |
| chr3  | 142203932 | 142203971 | ATR_3896   | - | GTGACCTATGCACCAGACGTTGAATGTCATGTTTGCAGATTAATATGAAGGATGACTATAGATCGGAAGAGCGGTTTCAG    |
| chr3  | 142211924 | 142211963 | ATR_3897   | - | GTGACCTATGCACCAGACGTTGATAATGCAGTTTCAGTTAACTCTGTTGACTACGTAAAAAGATCGGAAGAGCGGTTTCAG   |
| chr3  | 142215805 | 142215844 | ATR_3898   | - | GTGACCTATGCACCAGACGTTACTTTTTTAAAAATGTCATTTACTTGAATTTGGTATAGATCGGAAGAGCGGTTTCAG      |
| chr3  | 142217389 | 142217428 | ATR_3899   | - | GTGACCTATGCACCAGACGTTATTTCCATTTTATATTTTCCGCTATAAATGTCACCTGAAGATCGGAAGAGCGGTTTCAG    |
| chr3  | 142222154 | 142222193 | ATR_3900   | - | GTGACCTATGCACCAGACGTATAAAATGATTTTCTTTGTTATTGCATCTGAATGGAGAAGATCGGAAGAGCGGTTTCAG     |
| chr3  | 142223931 | 142223970 | ATR_3901   | - | GTGACCTATGCACCAGACGTAAATGAAAGGCAACTGTAATGAAAATAGCCCTGAATGGAAGATCGGAAGAGCGGTTTCAG    |
| chr3  | 142226723 | 142226762 | ATR_3902   | - | GTGACCTATGCACCAGACGTAATATAGTGAATTTAATAATGAAAATTAATGTGCCAGTCAGATCGGAAGAGCGGTTTCAG    |
| chr3  | 142231052 | 142231091 | ATR_3903   | - | GTGACCTATGCACCAGACGTACTTCTGTTTTTTTTTTTTTTTTTTAGCTATTCACCAGATCGGAAGAGCGGTTTCAG       |
| chr3  | 142232293 | 142232332 | ATR_3904   | - | GTGACCTATGCACCAGACGTTTCATCTTACTTGTGTTTTGAACATGGAACCTACTTTCTAGATCGGAAGAGCGGTTTCAG    |
| chr3  | 142234187 | 142234226 | ATR_3905   | - | GTGACCTATGCACCAGACGTTCTGTTAGTTTGTAACTGAAATGAAAATCTAAAGGAAACAGATCGGAAGAGCGGTTTCAG    |
| chr3  | 142241520 | 142241559 | ATR_3906   | - | GTGACCTATGCACCAGACGTATATAGTCATTACTGGCTTTAAATTGTTAATCAAATAAAGATCGGAAGAGCGGTTTCAG     |
| chr3  | 142242785 | 142242824 | ATR_3907   | - | GTGACCTATGCACCAGACGTTGAAATTTGGAATGACAAAAGAGTTCTCTGTCCCTATTGAGGAGATCGGAAGAGCGGTTTCAG |
| chr3  | 142253872 | 142253911 | ATR_3908   | - | GTGACCTATGCACCAGACGTATGATATAATAAAAATGATAACAAAGAAAGATTGGAGGAGATCGGAAGAGCGGTTTCAG     |
| chr3  | 142254900 | 142254939 | ATR_3909   | - | GTGACCTATGCACCAGACGTTTAATTTGTGGTTTAGGAGATCATAACAGCAATTGTTAGATCGGAAGAGCGGTTTCAG      |
| chr3  | 142257274 | 142257313 | ATR_3910   | - | GTGACCTATGCACCAGACGTTGAATTAATAGTAAATTAATAACTTTTTAAACTGTATTTAGATCGGAAGAGCGGTTTCAG    |
| chr3  | 142261457 | 142261496 | ATR_3911   | - | GTGACCTATGCACCAGACGTATAGTCCAGAGTGCTAAGATAGAATTTCATACAGAATAAAGATCGGAAGAGCGGTTTCAG    |
| chr3  | 142266517 | 142266556 | ATR_3912   | - | GTGACCTATGCACCAGACGTTGTTCTATGAGGTTTTTTGTTGTTTCTTCTTTTCAGATCGGAAGAGCGGTTTCAG         |
| chr3  | 142268924 | 142268963 | ATR_3913   | - | GTGACCTATGCACCAGACGTACATATAGTTCACCTTGAAGTTTGAACCTAGATTTTTGTTAGATCGGAAGAGCGGTTTCAG   |
| chr3  | 142272019 | 142272058 | ATR_3914   | - | GTGACCTATGCACCAGACGTGCGTTTTGTCTGGACTATAGGCAACAGCAGTACTTTTTAAGAGATCGGAAGAGCGGTTTCAG  |
| chr3  | 142272432 | 142272471 | ATR_3915   | - | GTGACCTATGCACCAGACGTGAGCTTGTCTTCTTATTTTGGCCATTCTCCAGATCGGAAGAGCGGTTTCAG             |
| chr3  | 142272617 | 142272656 | ATR_3916   | - | GTGACCTATGCACCAGACGTTTTGTTTTTAACTTTGAGTTTTACGTTCAACCTAGCTCTAAAGATCGGAAGAGCGGTTTCAG  |
| chr3  | 142274669 | 142274708 | ATR_3917   | - | GTGACCTATGCACCAGACGTATGACTTATTAATACTTTAAACCTATTTAAGCTCTGCTAGATCGGAAGAGCGGTTTCAG     |
| chr3  | 142275175 | 142275214 | ATR_3918   | - | GTGACCTATGCACCAGACGTAGATTTTAATTTGAATATATCACTCTATTGGAAGATCATAGATCGGAAGAGCGGTTTCAG    |
| chr3  | 142278043 | 142278082 | ATR_3919   | - | GTGACCTATGCACCAGACGTATTAGCAACAGATCAGAATAAGCTTTAAAGATAATCAGTAAGATCGGAAGAGCGGTTTCAG   |
| chr3  | 142279055 | 142279094 | ATR_3920   | - | GTGACCTATGCACCAGACGTTCTTCTGTTTCTGGGTTGGGTTTCTGTAAATGAATTTGAGATCGGAAGAGCGGTTTCAG     |
| chr3  | 142280035 | 142280074 | ATR_3921   | - | GTGACCTATGCACCAGACGTTCTTCTTCACTGTTTTGATTTAGCCATTAAATAAACTTTGTTAGATCGGAAGAGCGGTTTCAG |
| chr3  | 142281024 | 142281063 | ATR_3922   | - | GTGACCTATGCACCAGACGTTTTAGGTTACTAGTTAAGTATGATTTTTGTTTCATCATTTAGATCGGAAGAGCGGTTTCAG   |
| chr3  | 142284913 | 142284952 | ATR_3923   | - | GTGACCTATGCACCAGACGTTTATTCATGCATTCCTTGGCCATCTGTTCTATAAAATCCTAGATCGGAAGAGCGGTTTCAG   |
| chr3  | 142286855 | 142286894 | ATR_3924   | - | GTGACCTATGCACCAGACGTAATTTTCTTATATAAATTTATAAATTAAGATTTTTCTTAGATCGGAAGAGCGGTTTCAG     |
| chr3  | 142297438 | 142297477 | ATR_3925   | - | GTGACCTATGCACCAGACGTGCCCAGCCTGGGTCTGCATCCTCCTCCGCTGATTCGGCAGATCGGAAGAGCGGTTTCAG     |
| chr3  | 142281463 | 142281502 | ATR_3926   | - | GTGACCTATGCACCAGACGTTGCAATTGCTTTTTAACAGAAGTTTTCAGCTGGAGGACATCGGAAGAGCGGTTTCAG       |
| chr19 | 45251998  | 45252037  | BCL3_3927  | - | GTGACCTATGCACCAGACGTGGGACGCGGCGGCGGACCGCTGGGCTCGGCTGCACGGGAGATCGGAAGAGCGGTTTCAG     |
| chr19 | 45254434  | 45254473  | BCL3_3928  | - | GTGACCTATGCACCAGACGTGAGGACAGAGAAGGGACATGGGTGAGGCCACACCCACAGAAGATCGGAAGAGCGGTTTCAG   |
| chr19 | 45259439  | 45259478  | BCL3_3929  | - | GTGACCTATGCACCAGACGTGGGAGTGAAGGAATCACAGGCATTAGGGGTTGTTACCTCAGATCGGAAGAGCGGTTTCAG    |
| chr19 | 45260224  | 45260263  | BCL3_3930  | - | GTGACCTATGCACCAGACGTGTGACTGTGAGGGACCTGTGTCCAGCCCTGCTCTCTAGTCAGATCGGAAGAGCGGTTTCAG   |
| chr19 | 45260534  | 45260573  | BCL3_3931  | - | GTGACCTATGCACCAGACGTGGAGGGCTCGGTGAAACCTAGGCCCGGGCTTTGCGGCCGAGATCGGAAGAGCGGTTTCAG    |
| chr19 | 45260853  | 45260892  | BCL3_3932  | - | GTGACCTATGCACCAGACGTGAGGGAGGCTTAGTTTTCTCCAAGCTGCTCCAGCAGATCGGAAGAGCGGTTTCAG         |
| chr19 | 45261453  | 45261492  | BCL3_3933  | - | GTGACCTATGCACCAGACGTGGAGGGCCGGGTGAGGAGGCGCGCGGCCACCCGGGTAAGATCGGAAGAGCGGTTTCAG      |
| chr19 | 45261931  | 45261970  | BCL3_3934  | - | GTGACCTATGCACCAGACGTATGGCGTGACCATAGAGCCACCCATGCCTCACAGTCTCAGATCGGAAGAGCGGTTTCAG     |
| chr2  | 32582180  | 32582219  | BIRC6_3935 | - | GTGACCTATGCACCAGACGTGGGGCAAGCCGAGCGCTTAGCCGGAAGTGAAGTCAGCGCAGATCGGAAGAGCGGTTTCAG    |
| chr2  | 32602606  | 32602645  | BIRC6_3936 | - | GTGACCTATGCACCAGACGTAACAAAATTAACACTTAAGATTTTCAGGCCAATGGTCTAGATCGGAAGAGCGGTTTCAG     |
| chr2  | 32613768  | 32613807  | BIRC6_3937 | - | GTGACCTATGCACCAGACGTATGGGATTAAGCAAAAGGAAAATGACTCAACAGTTTTAAGATCGGAAGAGCGGTTTCAG     |
| chr2  | 32617057  | 32617096  | BIRC6_3938 | - | GTGACCTATGCACCAGACGTACATCTTATGTAATTAAGTTAGGCATCAAATCACAGTAGATCGGAAGAGCGGTTTCAG      |
| chr2  | 32620529  | 32620568  | BIRC6_3939 | - | GTGACCTATGCACCAGACGTATAAAGAAAAGAGACAGAAAAGGTAATCATTATTAATAAGATCGGAAGAGCGGTTTCAG     |
| chr2  | 32626181  | 32626220  | BIRC6_3940 | - | GTGACCTATGCACCAGACGTATTTAGAAAAGAAAAGTTTACTAAAATAAAGCAATTCAGAGATCGGAAGAGCGGTTTCAG    |
| chr2  | 32626481  | 32626520  | BIRC6_3941 | - | GTGACCTATGCACCAGACGTGAAAAGCCTAAGTTTACAACCTGATCTTTTTCAATTAAGATCGGAAGAGCGGTTTCAG      |
| chr2  | 32631517  | 32631556  | BIRC6_3942 | - | GTGACCTATGCACCAGACGTAAAACAAAGTAAACAATTTGAATTTCAAAAAAGTATACAGATCGGAAGAGCGGTTTCAG     |
| chr2  | 32639787  | 32639826  | BIRC6_3943 | - | GTGACCTATGCACCAGACGTGAACAATTTCATAGATGTTTTCTACTCATCCAGTCAGAGATCGGAAGAGCGGTTTCAG      |
| chr2  | 32654164  | 32654203  | BIRC6_3944 | - | GTGACCTATGCACCAGACGTTGAAATTTATAGATACATGAAAATAAGGTAACATTCAAAGATCGGAAGAGCGGTTTCAG     |

|      |          |          |            |   |                                                                                      |
|------|----------|----------|------------|---|--------------------------------------------------------------------------------------|
| chr2 | 32658662 | 32658701 | BIRC6_3945 | - | GTGACCTATGCACCAGACGTAGGGGAAAAATGCTAAATAAGCAAAAATCTTTCTTTCAGCAGATCGGAAGAGCGGTTTCAG    |
| chr2 | 32660514 | 32660553 | BIRC6_3946 | - | GTGACCTATGCACCAGACGTAGGAAAGGTGATCTGCCTATCTACTGCTGTTTCTAGAGGAAGATCGGAAGAGCGGTTTCAG    |
| chr2 | 32661071 | 32661110 | BIRC6_3947 | - | GTGACCTATGCACCAGACGTAAATACATATTTTTCTTTTAAATTCATTCATTTAAATGTAGATCGGAAGAGCGGTTTCAG     |
| chr2 | 32664526 | 32664565 | BIRC6_3948 | - | GTGACCTATGCACCAGACGTGGAGTAGAATGGGGAAAAATAACTGAATCACCAATAAAATTCAGATCGGAAGAGCGGTTTCAG  |
| chr2 | 32666347 | 32666386 | BIRC6_3949 | - | GTGACCTATGCACCAGACGTCAAATAATAATGAATTTTAAAAAATAAACTAAACTAAAAAAGATCGGAAGAGCGGTTTCAG    |
| chr2 | 32667083 | 32667122 | BIRC6_3950 | - | GTGACCTATGCACCAGACGTGAAAAATATAAACCACTTACCAAAAAACAAAACAACAACATAGATCGGAAGAGCGGTTTCAG   |
| chr2 | 32667342 | 32667381 | BIRC6_3951 | - | GTGACCTATGCACCAGACGTATAGCAGACATTTAGACTCATCTGAACITTCATCATAAAGATCGGAAGAGCGGTTTCAG      |
| chr2 | 32668509 | 32668548 | BIRC6_3952 | - | GTGACCTATGCACCAGACGTTTTTAAAAAGAAAAATTTGTAAGACATTTACTCAAGGTCTAAAGATCGGAAGAGCGGTTTCAG  |
| chr2 | 32670539 | 32670578 | BIRC6_3953 | - | GTGACCTATGCACCAGACGTAAAAACAAAATAAATGTTTCTTTTCTCTCTTTCTCTCTAGATCGGAAGAGCGGTTTCAG      |
| chr2 | 32673813 | 32673852 | BIRC6_3954 | - | GTGACCTATGCACCAGACGTAAATAATGACTAACAATTTTCTCTTTCAGCCATCTAATTAAGATCGGAAGAGCGGTTTCAG    |
| chr2 | 32678826 | 32678865 | BIRC6_3955 | - | GTGACCTATGCACCAGACGTAAAGACAAGTTTTATAACACGTGAAGATAATTTTTAAAAAGAGATCGGAAGAGCGGTTTCAG   |
| chr2 | 32688212 | 32688251 | BIRC6_3956 | - | GTGACCTATGCACCAGACGTACAAGGGTAAAAACAAAAACAAAAACACCAGGATGAAGAGATCGGAAGAGCGGTTTCAG      |
| chr2 | 32689527 | 32689566 | BIRC6_3957 | - | GTGACCTATGCACCAGACGTAGTAAAAACAACATATATAGACTAATCTGCCTACCTAAAAAGATCGGAAGAGCGGTTTCAG    |
| chr2 | 32690083 | 32690122 | BIRC6_3958 | - | GTGACCTATGCACCAGACGTGAAAAAATAAATACTAATCTTATATTGATATTACTATAGAGATCGGAAGAGCGGTTTCAG     |
| chr2 | 32692543 | 32692582 | BIRC6_3959 | - | GTGACCTATGCACCAGACGTAAAGAGAAACAGTTGACCAAAAATATATCAATTAACAAAAGATCGGAAGAGCGGTTTCAG     |
| chr2 | 32692921 | 32692960 | BIRC6_3960 | - | GTGACCTATGCACCAGACGTAAATATAATATACATATATACACACTCTGCCACAATAAAAGATCGGAAGAGCGGTTTCAG     |
| chr2 | 32693455 | 32693494 | BIRC6_3961 | - | GTGACCTATGCACCAGACGTAAAAGATTGAACAAAAATAATCTTGTAATGTCTCTTTATAGATCGGAAGAGCGGTTTCAG     |
| chr2 | 32694413 | 32694452 | BIRC6_3962 | - | GTGACCTATGCACCAGACGTAAAGAAAAACAACTTTCTTATTAATGTATTGTATAAGATCGGAAGAGCGGTTTCAG         |
| chr2 | 32695186 | 32695225 | BIRC6_3963 | - | GTGACCTATGCACCAGACGTAAACAAAAAAGAAAAGAATAAGAATCAATTCGATTGTAGATCGGAAGAGCGGTTTCAG       |
| chr2 | 32696032 | 32696071 | BIRC6_3964 | - | GTGACCTATGCACCAGACGTATGACAGCAAAGGAAAAACATCCAGATGACTTTAGGATTCAGATCGGAAGAGCGGTTTCAG    |
| chr2 | 32698130 | 32698169 | BIRC6_3965 | - | GTGACCTATGCACCAGACGTAGGAAAACTTGTATTAAATTCCTGTTAAATGTGATTTTAAAGATCGGAAGAGCGGTTTCAG    |
| chr2 | 32701231 | 32701270 | BIRC6_3966 | - | GTGACCTATGCACCAGACGTCAAATAAAACAATTAATCTTTAAACAAGTTAAAAACAAAAAGATCGGAAGAGCGGTTTCAG    |
| chr2 | 32702386 | 32702425 | BIRC6_3967 | - | GTGACCTATGCACCAGACGTAAATGTATAGTGTAAAATCAATGTTTACTTAATGAAAATAGATCGGAAGAGCGGTTTCAG     |
| chr2 | 32703653 | 32703692 | BIRC6_3968 | - | GTGACCTATGCACCAGACGTTTTTATAAAATCATACACTTAAATAGCAATTAACATGTTTTAGATCGGAAGAGCGGTTTCAG   |
| chr2 | 32704480 | 32704519 | BIRC6_3969 | - | GTGACCTATGCACCAGACGTGGGGATAGTCTGTTTTAATAATTTATACAGATTTGAAAAGATCGGAAGAGCGGTTTCAG      |
| chr2 | 32706338 | 32706377 | BIRC6_3970 | - | GTGACCTATGCACCAGACGTAAAAAGTATCTTATTGGTGGAGTGATCACATAAAATAGATCGGAAGAGCGGTTTCAG        |
| chr2 | 32707447 | 32707486 | BIRC6_3971 | - | GTGACCTATGCACCAGACGTGGAAAAAAACTGTGGTTTTATTTTTGCCTCTTGCTGAAAGATCGGAAGAGCGGTTTCAG      |
| chr2 | 32710660 | 32710699 | BIRC6_3972 | - | GTGACCTATGCACCAGACGTCAATTGAAAGAAAAAGAAAACATTGACAATTTACTCATAGATCGGAAGAGCGGTTTCAG      |
| chr2 | 32712664 | 32712703 | BIRC6_3973 | - | GTGACCTATGCACCAGACGTAAACAAGTATAATTTATACATAAAGATCAGGATATGTAGATCGGAAGAGCGGTTTCAG       |
| chr2 | 32713605 | 32713644 | BIRC6_3974 | - | GTGACCTATGCACCAGACGTAAAAATCAACAGGAGAAAAATGTACCTATTATAATATGAGATCGGAAGAGCGGTTTCAG      |
| chr2 | 32715058 | 32715097 | BIRC6_3975 | - | GTGACCTATGCACCAGACGTAAAGAAAAGGGAAAAATTTTTTCAGAAAAACAATGTTTTATAGATCGGAAGAGCGGTTTCAG   |
| chr2 | 32716442 | 32716481 | BIRC6_3976 | - | GTGACCTATGCACCAGACGTTTTTTTAAAAACCTCTTAAGAAATGGACCATGAAATATGAGATCGGAAGAGCGGTTTCAG     |
| chr2 | 32718557 | 32718596 | BIRC6_3977 | - | GTGACCTATGCACCAGACGTATGTATTTCACTGAAAACCTGCTTACTGGTAACATGTTAAAGATCGGAAGAGCGGTTTCAG    |
| chr2 | 32727812 | 32727851 | BIRC6_3978 | - | GTGACCTATGCACCAGACGTAAATATGCATATTTATGACTTTATATATCTGTGTAATAAGATCGGAAGAGCGGTTTCAG      |
| chr2 | 32728059 | 32728098 | BIRC6_3979 | - | GTGACCTATGCACCAGACGTAAAGAAATGAAATGAAATGCATCTCAGGACAGATGGTTTCAGATCGGAAGAGCGGTTTCAG    |
| chr2 | 32730022 | 32730061 | BIRC6_3980 | - | GTGACCTATGCACCAGACGTATTTTTTACATAAATTTATAAGAACTTGCAAAAAGAAACATAAAGATCGGAAGAGCGGTTTCAG |
| chr2 | 32732997 | 32733036 | BIRC6_3981 | - | GTGACCTATGCACCAGACGTAGAAAACGAATCATCACAAAAAGACAAAAGTATACATAGATTAGATCGGAAGAGCGGTTTCAG  |
| chr2 | 32734755 | 32734794 | BIRC6_3982 | - | GTGACCTATGCACCAGACGTAAAAATGACTTGTATGATCAATATAAGTCGCTCAAATCACTAGATCGGAAGAGCGGTTTCAG   |
| chr2 | 32735543 | 32735582 | BIRC6_3983 | - | GTGACCTATGCACCAGACGTAGAAATCCAAAGAAAAGTTTGCTAAATAAGCAAGTTAACCCAGATCGGAAGAGCGGTTTCAG   |
| chr2 | 32737950 | 32737989 | BIRC6_3984 | - | GTGACCTATGCACCAGACGTGAAAAAGAAATCATATAACCAACTATATAGTGAATTTGCGAGATCGGAAGAGCGGTTTCAG    |
| chr2 | 32740007 | 32740046 | BIRC6_3985 | - | GTGACCTATGCACCAGACGTAAAGATATCATATTAATGATACAAAGTATATTTTTAGAAAGAAAGATCGGAAGAGCGGTTTCAG |
| chr2 | 32743271 | 32743310 | BIRC6_3986 | - | GTGACCTATGCACCAGACGTAAAAATTTTTAAAAAGTTAAATGCAAGATTTATATGCAGCTAGATCGGAAGAGCGGTTTCAG   |
| chr2 | 32743834 | 32743873 | BIRC6_3987 | - | GTGACCTATGCACCAGACGTAGAAATCAAGAATCAGGAAGTAACTTTTTGAATACATAGATCGGAAGAGCGGTTTCAG       |
| chr2 | 32749905 | 32749944 | BIRC6_3988 | - | GTGACCTATGCACCAGACGTATATTATCTAAAATACACTGCTTTTTCCAATCATTAAAGAAAGATCGGAAGAGCGGTTTCAG   |
| chr2 | 32750481 | 32750520 | BIRC6_3989 | - | GTGACCTATGCACCAGACGTAGGATCAGTAAGATTCTACATAGTCAACACTAATATGAAGATCGGAAGAGCGGTTTCAG      |
| chr2 | 32754668 | 32754707 | BIRC6_3990 | - | GTGACCTATGCACCAGACGTATAACTAAGTTAAATCTGGAACCCGAGAAAGAAAACATTTAAGATCGGAAGAGCGGTTTCAG   |
| chr2 | 32756372 | 32756411 | BIRC6_3991 | - | GTGACCTATGCACCAGACGTAAATACAAAATAACTGAATAGGTAAGAAAAGGGTATTTTTAGATCGGAAGAGCGGTTTCAG    |
| chr2 | 32768258 | 32768297 | BIRC6_3992 | - | GTGACCTATGCACCAGACGTAGAAAAGTGTGGCTTGGCCATTACATTTTCAACATCAGAGATCGGAAGAGCGGTTTCAG      |
| chr2 | 32770660 | 32770699 | BIRC6_3993 | - | GTGACCTATGCACCAGACGTGAAAGAAAGAGGACTCAAGATTAATAAAGATGAAAACACAAGATCGGAAGAGCGGTTTCAG    |
| chr2 | 32772867 | 32772906 | BIRC6_3994 | - | GTGACCTATGCACCAGACGTCAAAAAATGAAAATCCATTACAATTTGTTTTGCTTATCTAGATCGGAAGAGCGGTTTCAG     |
| chr2 | 32774330 | 32774369 | BIRC6_3995 | - | GTGACCTATGCACCAGACGTGTTGAAATTAATTTGGATTTTCAGTTTCACATACTTCAAAGAGATCGGAAGAGCGGTTTCAG   |
| chr2 | 32800173 | 32800212 | BIRC6_3996 | - | GTGACCTATGCACCAGACGTAAAGAAAGCAAAAAGCAAAAATGAGCAATGATAAATAAAGATCGGAAGAGCGGTTTCAG      |
| chr2 | 32818932 | 32818971 | BIRC6_3997 | - | GTGACCTATGCACCAGACGTAAATATGGAAGAAAAGCAAGGAAAATTAAGATTTTAGGAGATCGGAAGAGCGGTTTCAG      |
| chr2 | 32822768 | 32822807 | BIRC6_3998 | - | GTGACCTATGCACCAGACGTAAAGAAAAATAAACCAGAACTGCAAAAATTTGTTATAAAGATCGGAAGAGCGGTTTCAG      |
| chr2 | 32824756 | 32824795 | BIRC6_3999 | - | GTGACCTATGCACCAGACGTATAAACAATAAAAAGTCTATGTTAACATTCCTAAACACTGAGATCGGAAGAGCGGTTTCAG    |
| chr2 | 32828023 | 32828062 | BIRC6_4000 | - | GTGACCTATGCACCAGACGTAAAAAGCATAAACAGAATGAAAAAGAGTGCTTAAAAAGATCGGAAGAGCGGTTTCAG        |
| chr2 | 32832472 | 32832511 | BIRC6_4001 | - | GTGACCTATGCACCAGACGTAAAGAAAAGAACACTATGAGGGACATTTTTACTGTGGAGATCGGAAGAGCGGTTTCAG       |
| chr2 | 32836465 | 32836504 | BIRC6_4002 | - | GTGACCTATGCACCAGACGTAGTAAAACAGGAAACAAGCAGTGTTTACAGTCAAATTTAAAGATCGGAAGAGCGGTTTCAG    |

|       |           |           |              |   |                                                                                       |
|-------|-----------|-----------|--------------|---|---------------------------------------------------------------------------------------|
| chr2  | 32842742  | 32842781  | BIRC6_4003   | - | GTGACCTATGCACCAGACGTGAAAAGGACTAATGTTAGAAGTCAAACCCCTCTAGCACAAGATCGGAAGAGCGGTTTCAG      |
| chr2  | 32724845  | 32724884  | BIRC6_4004   | - | GTGACCTATGCACCAGACGTCATTTCGCCACAAAAGTCTTTTGCATCACCCGACGAATAAGATCGGAAGAGCGGTTTCAG      |
| chr2  | 32740397  | 32740436  | BIRC6_4005   | - | GTGACCTATGCACCAGACGTAGCTAGAAAATGTGGCTAAAGCAGAAAAGTCCCTAGATCGGAAGAGCGGTTTCAG           |
| chr2  | 32640252  | 32640291  | BIRC6_4006   | - | GTGACCTATGCACCAGACGCTTTCTCTGCTTTCTCATCAGATTCCCTTGATGCTATAAAGAAGATCGGAAGAGCGGTTTCAG    |
| chr2  | 32640717  | 32640756  | BIRC6_4007   | - | GTGACCTATGCACCAGACGTGATTACATAATATTTGCACCATTCACTACACGAAGATTTAGATCGGAAGAGCGGTTTCAG      |
| chr17 | 59760607  | 59760646  | BRIP1_4008   | - | GTGACCTATGCACCAGACGTTCTCAAGTCAAGTAAAATATGTCATCATGCTTATGTTAAAGATCGGAAGAGCGGTTTCAG      |
| chr17 | 59763147  | 59763186  | BRIP1_4009   | - | GTGACCTATGCACCAGACGTCTTCCCTTTACCTTTGATAGAGAAGTCTTTTCATTATAAGATCGGAAGAGCGGTTTCAG       |
| chr17 | 59793262  | 59793301  | BRIP1_4010   | - | GTGACCTATGCACCAGACGTTGAAATTTAATAATAATTATCTGTGACAGGGCTATATATAGATCGGAAGAGCGGTTTCAG      |
| chr17 | 59820324  | 59820363  | BRIP1_4011   | - | GTGACCTATGCACCAGACGTAAAACCTTAAGTTTTATTATTACAGGAGTCAATGGTTTTGAGATCGGAAGAGCGGTTTCAG     |
| chr17 | 59821743  | 59821782  | BRIP1_4012   | - | GTGACCTATGCACCAGACGTATTATTTTCATGGTCCGTGAAAAAATATTTTTTATTACAAAAGATCGGAAGAGCGGTTTCAG    |
| chr17 | 59853712  | 59853751  | BRIP1_4013   | - | GTGACCTATGCACCAGACGTATTTATTGTTTTCTTTTGCCTTTAAATAATCATTTCATTTAGATCGGAAGAGCGGTTTCAG     |
| chr17 | 59857572  | 59857611  | BRIP1_4014   | - | GTGACCTATGCACCAGACGTGTTTTTTTTTGGAAAGCCCTTCAGTGTCTTCTACTTCAATAGATCGGAAGAGCGGTTTCAG     |
| chr17 | 59858151  | 59858190  | BRIP1_4015   | - | GTGACCTATGCACCAGACGTGATGTAATGGAAATTTTGTCTTCTTGCATACCAGCAAGATCGGAAGAGCGGTTTCAG         |
| chr17 | 59861581  | 59861620  | BRIP1_4016   | - | GTGACCTATGCACCAGACGTATAACTAGTATGATTTTTCTTTTAAAAATAGCCTAATTTAGATCGGAAGAGCGGTTTCAG      |
| chr17 | 59870908  | 59870947  | BRIP1_4017   | - | GTGACCTATGCACCAGACGTTTTTCTACCTGTGAAACGTATTAGTGAATTAGAAGTGATAGATCGGAAGAGCGGTTTCAG      |
| chr17 | 59876411  | 59876450  | BRIP1_4018   | - | GTGACCTATGCACCAGACGTTTGTCTATAGTGTATTTGTGCTGCCTTTATATGAAAAATAGATCGGAAGAGCGGTTTCAG      |
| chr17 | 59878564  | 59878603  | BRIP1_4019   | - | GTGACCTATGCACCAGACGTGTGTAATAAGAACCTTCTTCTACTCATGGAGATGTAAGATCGGAAGAGCGGTTTCAG         |
| chr17 | 59885778  | 59885817  | BRIP1_4020   | - | GTGACCTATGCACCAGACGTTATTTTGTGTAGAGAAAAATAGGCTGAAAAATTTAAGATCGGAAGAGCGGTTTCAG          |
| chr17 | 59924412  | 59924451  | BRIP1_4021   | - | GTGACCTATGCACCAGACGTATGCCATTGTTTCAGTTTTAAAGAAAGGAAGATGGAATTTAGATCGGAAGAGCGGTTTCAG     |
| chr17 | 59926440  | 59926479  | BRIP1_4022   | - | GTGACCTATGCACCAGACGTTTTATTGGCAGTAAATAACCCAGTATAGTACAGCTGAACAAGATCGGAAGAGCGGTTTCAG     |
| chr17 | 59934369  | 59934408  | BRIP1_4023   | - | GTGACCTATGCACCAGACGTTTTTGCCTGGGTGAGTTGATATCTGTAATAAGAGTCTTAAAGATCGGAAGAGCGGTTTCAG     |
| chr17 | 59937107  | 59937146  | BRIP1_4024   | - | GTGACCTATGCACCAGACGTGCTTGATATCTTCAGGTTACTTACTGGGATCTGAGAAAATAGATCGGAAGAGCGGTTTCAG     |
| chr17 | 59938758  | 59938797  | BRIP1_4025   | - | GTGACCTATGCACCAGACGTTTTCAGCAGTAAAGTTTTTAAATAGATAGATACTTATGAAGATCGGAAGAGCGGTTTCAG      |
| chr17 | 59761029  | 59761068  | BRIP1_4026   | - | GTGACCTATGCACCAGACGTACAGTCCACTTCAAAATAGAGATTTTGAACAAGAAGATCGGAAGAGCGGTTTCAG           |
| chr16 | 88943334  | 88943373  | CBFA2T3_4027 | - | GTGACCTATGCACCAGACGTCCCTGGCCTGCCGGACACAGCACCGTGCCAACCCACCCCAAGATCGGAAGAGCGGTTTCAG     |
| chr16 | 88945628  | 88945667  | CBFA2T3_4028 | - | GTGACCTATGCACCAGACGTCCGGCCACGCTGACACCCATCCCTGCCTCGGCTCCCCTGAGATCGGAAGAGCGGTTTCAG      |
| chr16 | 88947078  | 88947117  | CBFA2T3_4029 | - | GTGACCTATGCACCAGACGTGTGCAGGGGCTGGCCACGAGAGCTGTGGGAGGCCAGGGCAGATCGGAAGAGCGGTTTCAG      |
| chr16 | 88947649  | 88947688  | CBFA2T3_4030 | - | GTGACCTATGCACCAGACGTGGTGTGGGGGGAGGGAGCAGACACGGGGTGCTCTGGTGGGAGATCGGAAGAGCGGTTTCAG     |
| chr16 | 88951404  | 88951443  | CBFA2T3_4031 | - | GTGACCTATGCACCAGACGTGGTGGGGGGGAGCGTGGACCGGTTACAGAGCACACAGATCGGAAGAGCGGTTTCAG          |
| chr16 | 88952319  | 88952358  | CBFA2T3_4032 | - | GTGACCTATGCACCAGACGTGCTCCGGGATCTCGGGCTGGGGTGGCCGTGGACCGGCAGATCGGAAGAGCGGTTTCAG        |
| chr16 | 88958240  | 88958279  | CBFA2T3_4033 | - | GTGACCTATGCACCAGACGTACCCGTCCCGCTGCTGCGGGAGCCTCCCTAGAAGGCCCAGATCGGAAGAGCGGTTTCAG       |
| chr16 | 88958602  | 88958641  | CBFA2T3_4034 | - | GTGACCTATGCACCAGACGTACGGGACAGCCGGGGCCTTGGGACATGCATATCCCTCCGAGATCGGAAGAGCGGTTTCAG      |
| chr16 | 88964436  | 88964475  | CBFA2T3_4035 | - | GTGACCTATGCACCAGACGTAAACAAAACCCGAGCCCTCCCACAGAGTCTTACCAGAGATCGGAAGAGCGGTTTCAG         |
| chr16 | 88967862  | 88967901  | CBFA2T3_4036 | - | GTGACCTATGCACCAGACGTCCCACCTCCAGCAGCCGGGGCAGTGTTCAGGGGAGGCCAGATCGGAAGAGCGGTTTCAG       |
| chr16 | 89043015  | 89043054  | CBFA2T3_4037 | - | GTGACCTATGCACCAGACGTCCBAGGGGAGGTTGGTGGGTTGGGGGACAGAGCGGAGCCAGATCGGAAGAGCGGTTTCAG      |
| chr1  | 193094192 | 193094231 | CDC73_4038   | - | GTGACCTATGCACCAGACGTAAAGCAAGATTTTTTTTACTGACAATTCTAATTCAACTCAGATCGGAAGAGCGGTTTCAG      |
| chr1  | 193099254 | 193099293 | CDC73_4039   | - | GTGACCTATGCACCAGACGTAAATTTAAATGAGATATGAAATGAATAACAATGATACACAAGATCGGAAGAGCGGTTTCAG     |
| chr1  | 193104471 | 193104510 | CDC73_4040   | - | GTGACCTATGCACCAGACGTAAAAAGATTCACGTAAGGATTAATTTTCAACATATATATAGATCGGAAGAGCGGTTTCAG      |
| chr1  | 193104617 | 193104656 | CDC73_4041   | - | GTGACCTATGCACCAGACGTAAAGAGAAGTAAATAAATGTGTAGTTTTGGAATGGGCTTCTAGATCGGAAGAGCGGTTTCAG    |
| chr1  | 193107165 | 193107204 | CDC73_4042   | - | GTGACCTATGCACCAGACGTCCACTGGTAAATGCATTTAAATTTTTTATGAACTTTTAGAGATCGGAAGAGCGGTTTCAG      |
| chr1  | 193110930 | 193110969 | CDC73_4043   | - | GTGACCTATGCACCAGACGTTTTCTTTTTTAAATTTTACACGAAAGGCATTCCCTGGAGTGTAGATCGGAAGAGCGGTTTCAG   |
| chr1  | 193116947 | 193116986 | CDC73_4044   | - | GTGACCTATGCACCAGACGTAAATGGATTTTAAATTAAGCCCACTTTAAATATACAATAGTAAAGATCGGAAGAGCGGTTTCAG  |
| chr1  | 193119384 | 193119423 | CDC73_4045   | - | GTGACCTATGCACCAGACGTATTAATTTAGTACTTGTTAATATTTTTAAATGTCACATAGATCGGAAGAGCGGTTTCAG       |
| chr1  | 193121460 | 193121499 | CDC73_4046   | - | GTGACCTATGCACCAGACGTAAAGAGGCTTATTTGTTAAGATTTTATAGATCATGTATCTTAGATCGGAAGAGCGGTTTCAG    |
| chr1  | 193172875 | 193172914 | CDC73_4047   | - | GTGACCTATGCACCAGACGTATAAGAATTGATATATAAGATCAAAGTTTTCTTACATAATAGATCGGAAGAGCGGTTTCAG     |
| chr1  | 193181145 | 193181184 | CDC73_4048   | - | GTGACCTATGCACCAGACGTGAAAAAATCACAACCTCTGTGCATAAAAAACCATATTTCTAGATCGGAAGAGCGGTTTCAG     |
| chr1  | 193181470 | 193181509 | CDC73_4049   | - | GTGACCTATGCACCAGACGTAAAAATTTACAGGTAGAAAATATATTATTAGAATTATACTAGATCGGAAGAGCGGTTTCAG     |
| chr1  | 193202073 | 193202112 | CDC73_4050   | - | GTGACCTATGCACCAGACGTACAGAGATGAGAAAAAGTCAATGTATTCCACGTGATGAAAAGATCGGAAGAGCGGTTTCAG     |
| chr1  | 193205336 | 193205375 | CDC73_4051   | - | GTGACCTATGCACCAGACGTAAAAAGTGGGTGGGGGGAGGTAGGGGACAGCAGGAGATTATAGATCGGAAGAGCGGTTTCAG    |
| chr1  | 193218810 | 193218849 | CDC73_4052   | - | GTGACCTATGCACCAGACGTGGTGGAGAGAAGTTATCATTTTTACTCAAATAAAAAAAGATCGGAAGAGCGGTTTCAG        |
| chr1  | 193219756 | 193219795 | CDC73_4053   | - | GTGACCTATGCACCAGACGTATTATGTTAGTAGTTATAAGTACTATAGGAATTTTGAATTTAGATCGGAAGAGCGGTTTCAG    |
| chr5  | 68530753  | 68530792  | CDK7_4054    | - | GTGACCTATGCACCAGACGTAAAGCCGACTCCAGCCGAAAGGGCAGCTCCAGGACAGATCGGAAGAGCGGTTTCAG          |
| chr5  | 68531171  | 68531210  | CDK7_4055    | - | GTGACCTATGCACCAGACGTAAATAGAATAACATAAGTTTTATGGGAGTTTTTGTGTTTGGAGATCGGAAGAGCGGTTTCAG    |
| chr5  | 68548195  | 68548234  | CDK7_4056    | - | GTGACCTATGCACCAGACGTGGAAAAAACCCAAATATATTTAAATGTGTTAAATTATAGATCGGAAGAGCGGTTTCAG        |
| chr5  | 68550379  | 68550418  | CDK7_4057    | - | GTGACCTATGCACCAGACGTAGGCAAGCAAAAAGTGAATAATTTCTGAAATCTCAAACCTAGATCGGAAGAGCGGTTTCAG     |
| chr5  | 68551237  | 68551276  | CDK7_4058    | - | GTGACCTATGCACCAGACGTAAAAATTTAAATGTGATTCACTATTTAATACCTGACAGTAGATCGGAAGAGCGGTTTCAG      |
| chr5  | 68553820  | 68553859  | CDK7_4059    | - | GTGACCTATGCACCAGACGTAGTATACATAATACAGGTACCCCTTATTTCAAATAAAAAAGATCGGAAGAGCGGTTTCAG      |
| chr5  | 68555595  | 68555634  | CDK7_4060    | - | GTGACCTATGCACCAGACGTGAAGTTTTTAAACAAAACAAATGAAGCAGGTTAGGGGAGAACAAAGATCGGAAGAGCGGTTTCAG |

|       |           |           |            |   |                                                                                       |
|-------|-----------|-----------|------------|---|---------------------------------------------------------------------------------------|
| chr5  | 68557982  | 68558021  | CDK7_4061  | - | GTGACCTATGCACCAGACGTA AAAAGAATTAGTATCATTTTAGCATGAAATATCAAAGCAAGATCGGAAGAGCGGTTCCAG    |
| chr5  | 68572320  | 68572359  | CDK7_4062  | - | GTGACCTATGCACCAGACGTA AAAAGATACCAAAGTAAAGGTAGGTGAGTATCTGAAATGTAGATCGGAAGAGCGGTTCCAG   |
| chr5  | 68572884  | 68572923  | CDK7_4063  | - | GTGACCTATGCACCAGACGTA AAAAGAACAAGAAAAAAGTTGTTCCACATTTAACAAAAGATCGGAAGAGCGGTTCCAG      |
| chr17 | 57724709  | 57724748  | CLTC_4064  | - | GTGACCTATGCACCAGACGTAATCAAGAAATTATAATCATTTAAAGAGTAAAGTTTAGAAAAGATCGGAAGAGCGGTTCCAG    |
| chr17 | 57725551  | 57725590  | CLTC_4065  | - | GTGACCTATGCACCAGACGTTCAAAGGAGAATAACGTTTGAAGACCCATAAATCAAAACTAGATCGGAAGAGCGGTTCCAG     |
| chr17 | 57733165  | 57733204  | CLTC_4066  | - | GTGACCTATGCACCAGACGTA AAAACTCAACACTTTAGTAAAAAATGAATCTACAAAACAGAAGATCGGAAGAGCGGTTCCAG  |
| chr17 | 57737702  | 57737741  | CLTC_4067  | - | GTGACCTATGCACCAGACGTTAAGAATAAAATGTAGCTGCAATGTGTTCATTTGGATACAAAAGATCGGAAGAGCGGTTCCAG   |
| chr17 | 57738754  | 57738793  | CLTC_4068  | - | GTGACCTATGCACCAGACGTGAGA AATGTTAAAGCTCTTCGAAAAGTGAAGAAGGAGAAAAGATCGGAAGAGCGGTTCCAG    |
| chr17 | 57741153  | 57741192  | CLTC_4069  | - | GTGACCTATGCACCAGACGTG AAAAGAGATTGTTTAGTGATCCATGAACGTGTTTAGAAAAGATCGGAAGAGCGGTTCCAG    |
| chr17 | 57742098  | 57742137  | CLTC_4070  | - | GTGACCTATGCACCAGACGTACA AAGACTTAAACGCTGCTCCTAAGTTTCAATTTATAGAGATCGGAAGAGCGGTTCCAG     |
| chr17 | 57743414  | 57743453  | CLTC_4071  | - | GTGACCTATGCACCAGACGTAG ATTTAAAAGAAATTTGTTTTAAGATACTATGGAGAGTATAGATCGGAAGAGCGGTTCCAG   |
| chr17 | 57743791  | 57743830  | CLTC_4072  | - | GTGACCTATGCACCAGACGTACA AAACAAGGCAAGTTATTGTCCACTCCACTACATGAGAGATCGGAAGAGCGGTTCCAG     |
| chr17 | 57746088  | 57746127  | CLTC_4073  | - | GTGACCTATGCACCAGACGTCAA GATTTACA AATTAAGCATAGGCACACTTTTGAAATGAGATCGGAAGAGCGGTTCCAG    |
| chr17 | 57750958  | 57750997  | CLTC_4074  | - | GTGACCTATGCACCAGACGTGACA AAACAAAAGGAAAACCTTAAATTTCTTCTATGAGGTATAGATCGGAAGAGCGGTTCCAG  |
| chr17 | 57752012  | 57752051  | CLTC_4075  | - | GTGACCTATGCACCAGACGTAAA GAAGTAGAAGAATGTTATTATGTTATTTAAAAGCAAAGATCGGAAGAGCGGTTCCAG     |
| chr17 | 57754265  | 57754304  | CLTC_4076  | - | GTGACCTATGCACCAGACGTAG GAAAAAAACCTCACACACACATACTGTATTATAAATAAAGATCGGAAGAGCGGTTCCAG    |
| chr17 | 57756708  | 57756747  | CLTC_4077  | - | GTGACCTATGCACCAGACGTTAT GATAGATTAATTTCAAGTAAAAAGTAAAGGACTTTTATAGATCGGAAGAGCGGTTCCAG   |
| chr17 | 57758223  | 57758262  | CLTC_4078  | - | GTGACCTATGCACCAGACGTTAT ATGGGACATAAGTACTGAAATCAAGTTGTTTAAAAGATCGGAAGAGCGGTTCCAG       |
| chr17 | 57758606  | 57758645  | CLTC_4079  | - | GTGACCTATGCACCAGACGTAAA AAGAATATTTTTAAATGCAATATTTTAAAGTTTATCCGAAGATCGGAAGAGCGGTTCCAG  |
| chr17 | 57758958  | 57758997  | CLTC_4080  | - | GTGACCTATGCACCAGACGTAAG TTTGAAATTAGGGTTAGAGTAAATCAATCCTACCCAAGATCGGAAGAGCGGTTCCAG     |
| chr17 | 57759582  | 57759621  | CLTC_4081  | - | GTGACCTATGCACCAGACGTAAA AAGAAAAAATATATCCAAAACACTAACATCCTAGTTTAAAGATCGGAAGAGCGGTTCCAG  |
| chr17 | 57759940  | 57759979  | CLTC_4082  | - | GTGACCTATGCACCAGACGTAAA GGTAACCCACATTCAGCAAGATATTAGTGTGAGCTTAAAGATCGGAAGAGCGGTTCCAG   |
| chr17 | 57760218  | 57760257  | CLTC_4083  | - | GTGACCTATGCACCAGACGTCA TTTCCCTTGCTGTGAACCTCAATGTAAAACATGGCTAGTAGATCGGAAGAGCGGTTCCAG   |
| chr17 | 57760406  | 57760445  | CLTC_4084  | - | GTGACCTATGCACCAGACGTGAA GATGTTAGATGAAGAATCTATGTTGAAAAGAAAGATCGGAAGAGCGGTTCCAG         |
| chr17 | 57760698  | 57760737  | CLTC_4085  | - | GTGACCTATGCACCAGACGTAAG ACTTAATTGCTTTAGATATGAGTCTAGCTAACAGCCTAGATCGGAAGAGCGGTTCCAG    |
| chr17 | 57760936  | 57760975  | CLTC_4086  | - | GTGACCTATGCACCAGACGTAAA ATCCATACATAAGTCAAGTTACTTCCTAATGAGCTTTCAGATCGGAAGAGCGGTTCCAG   |
| chr17 | 57761186  | 57761225  | CLTC_4087  | - | GTGACCTATGCACCAGACGTAA GAGTTTGTACAAATATAGCACATTATTGAAGTCCCAGAGATCGGAAGAGCGGTTCCAG     |
| chr17 | 57762367  | 57762406  | CLTC_4088  | - | GTGACCTATGCACCAGACGTAAA AAGCCATCCAATGCCAGTCAATTTTGTTTAACATAGATCGGAAGAGCGGTTCCAG       |
| chr17 | 57762898  | 57762937  | CLTC_4089  | - | GTGACCTATGCACCAGACGTA AATAGTGAAGCTCAAAAACATTAGACCCACATACTGAAAGATCGGAAGAGCGGTTCCAG     |
| chr17 | 57767947  | 57767986  | CLTC_4090  | - | GTGACCTATGCACCAGACGTACA CATCATGTTAATTAGCACCCCAAAGTATTATAAACCAGATCGGAAGAGCGGTTCCAG     |
| chr17 | 57771039  | 57771078  | CLTC_4091  | - | GTGACCTATGCACCAGACGTAGA AAAACAAAAGAGCAGGGGGCAGGGGCAAGGAGGCAGAGATCGGAAGAGCGGTTCCAG     |
| chr8  | 113236950 | 113236989 | CSMD3_4092 | - | GTGACCTATGCACCAGACGTTTT GCCTTCTTCCAGAAGCTTGGAAATCGACACACAAAACAAGATCGGAAGAGCGGTTCCAG   |
| chr8  | 113240935 | 113240974 | CSMD3_4093 | - | GTGACCTATGCACCAGACGTTG ATTTTTAACTACAAAATGTTTCCCAAATCTGTTTTTCAAGATCGGAAGAGCGGTTCCAG    |
| chr8  | 113243724 | 113243763 | CSMD3_4094 | - | GTGACCTATGCACCAGACGTCAT TTTGATTTTTCACGAACCTGTTTATTATCCAGACATAGATCGGAAGAGCGGTTCCAG     |
| chr8  | 113246544 | 113246583 | CSMD3_4095 | - | GTGACCTATGCACCAGACGTTT ATTTTTAACTTCTGCTGCTGATTTTTAATGATAAATTTGATAGATCGGAAGAGCGGTTCCAG |
| chr8  | 113249369 | 113249408 | CSMD3_4096 | - | GTGACCTATGCACCAGACGTA AAAACAGCAGCGAAATATACCTTCATGACTTTATTCTAAGATCGGAAGAGCGGTTCCAG     |
| chr8  | 113253899 | 113253938 | CSMD3_4097 | - | GTGACCTATGCACCAGACGTTCA TTTGTTTTCTAGAGTTCATTATTTCTAAAATGGTCAGATCGGAAGAGCGGTTCCAG      |
| chr8  | 113256573 | 113256612 | CSMD3_4098 | - | GTGACCTATGCACCAGACGTTCT ATAGAATCTTTTAAACACAAGAGATTGCACATTGCTAGATCGGAAGAGCGGTTCCAG     |
| chr8  | 113259199 | 113259238 | CSMD3_4099 | - | GTGACCTATGCACCAGACGTTGG ATAAGAAAATGCTATCATGGGTAAAGAAATTTATAGATCGGAAGAGCGGTTCCAG       |
| chr8  | 113266432 | 113266471 | CSMD3_4100 | - | GTGACCTATGCACCAGACGTTAG CTATGCTCATTAGCATCATACTAGGTGAGAATGCGTAGATCGGAAGAGCGGTTCCAG     |
| chr8  | 113267433 | 113267472 | CSMD3_4101 | - | GTGACCTATGCACCAGACGTTT AAAGGCTGATTTGCACAGTAACGTGTGAATTAATAGAGATCGGAAGAGCGGTTCCAG      |
| chr8  | 113275818 | 113275857 | CSMD3_4102 | - | GTGACCTATGCACCAGACGTTTT CTACTAACAACTGTTACTTAAAATTTTCAAATTTTTCAGATCGGAAGAGCGGTTCCAG    |
| chr8  | 113293353 | 113293392 | CSMD3_4103 | - | GTGACCTATGCACCAGACGTTCT CAATATTTAAAAATCAGTAATTATAGAAATGTTGAAGATCGGAAGAGCGGTTCCAG      |
| chr8  | 113299243 | 113299282 | CSMD3_4104 | - | GTGACCTATGCACCAGACGTGC AAAAAATTAATATATTGCAACTACTGGATTTTAGTGTGAGATCGGAAGAGCGGTTCCAG    |
| chr8  | 113301544 | 113301583 | CSMD3_4105 | - | GTGACCTATGCACCAGACGTA AATTTGGACAATGTGTTGGAAATACATTATTTGTTAAAGATCGGAAGAGCGGTTCCAG      |
| chr8  | 113303689 | 113303728 | CSMD3_4106 | - | GTGACCTATGCACCAGACGTAAT GTGAATGTTTCTTGAGAACATGTCAATGGAACATAAGATCGGAAGAGCGGTTCCAG      |
| chr8  | 113304716 | 113304755 | CSMD3_4107 | - | GTGACCTATGCACCAGACGTAAG TATATTTCCCAATTTGGTGGCATGATAATAATATTACAAGATCGGAAGAGCGGTTCCAG   |
| chr8  | 113308012 | 113308051 | CSMD3_4108 | - | GTGACCTATGCACCAGACGTAT GGCAAAAGCAATTAGAGACCTCTGATCTTTGGAATAATAGATCGGAAGAGCGGTTCCAG    |
| chr8  | 113313972 | 113314011 | CSMD3_4109 | - | GTGACCTATGCACCAGACGTTT AAATTTGTTTTGTCAAACCTCCCTGCCCTCACCCTAGATCGGAAGAGCGGTTCCAG       |
| chr8  | 113316900 | 113316939 | CSMD3_4110 | - | GTGACCTATGCACCAGACGTACT CTGCTAACTTATTTCATAAGCTATGTTTGGTTATCGAGATCGGAAGAGCGGTTCCAG     |
| chr8  | 113318186 | 113318225 | CSMD3_4111 | - | GTGACCTATGCACCAGACGTAAG GAAATTTCACTGTTTCTCTGGTATTATTATAGATCGGAAGAGCGGTTCCAG           |
| chr8  | 113323157 | 113323196 | CSMD3_4112 | - | GTGACCTATGCACCAGACGTTT ATGGCAAAATGAAACAAAACATGAATGTGAGATTAGCAAGATCGGAAGAGCGGTTCCAG    |
| chr8  | 113326085 | 113326124 | CSMD3_4113 | - | GTGACCTATGCACCAGACGTTCT TATAACTCAGGACAGATCTCACTATCATCTCGGTATAGATCGGAAGAGCGGTTCCAG     |
| chr8  | 113326608 | 113326647 | CSMD3_4114 | - | GTGACCTATGCACCAGACGTGTT ATATTTATTGGATATTCATCAATTAAGTACA AATGTTAGATCGGAAGAGCGGTTCCAG   |
| chr8  | 113331016 | 113331055 | CSMD3_4115 | - | GTGACCTATGCACCAGACGTGTT CCTATGATTATTTATTCTTAAATATTTGCTTTATGTAGATCGGAAGAGCGGTTCCAG     |
| chr8  | 113332080 | 113332119 | CSMD3_4116 | - | GTGACCTATGCACCAGACGTTAA ATTTATTTTCAAAGAAAACATACTGCTGGCAACTATAGATCGGAAGAGCGGTTCCAG     |
| chr8  | 113347508 | 113347547 | CSMD3_4117 | - | GTGACCTATGCACCAGACGTTCT GAGAGTTCTTATTTCACTGTTTAAATTTGTCAGATCGGAAGAGCGGTTCCAG          |
| chr8  | 113348831 | 113348870 | CSMD3_4118 | - | GTGACCTATGCACCAGACGTACT ATTTGTTATTGATTTTCAATTTATATACAGATAAAAAGATCGGAAGAGCGGTTCCAG     |

|       |           |           |              |   |                                                                                     |
|-------|-----------|-----------|--------------|---|-------------------------------------------------------------------------------------|
| chr8  | 113349722 | 113349761 | CSMD3_4119   | - | GTGACCTATGCACCAGACGTAACCTGAAGCTATCTTTTAGGTGATGTCATCTGTTTTTAAAGATCGGAAGAGCGGTTCCAG   |
| chr8  | 113358276 | 113358315 | CSMD3_4120   | - | GTGACCTATGCACCAGACGTTAAAAACACGTGAAGAGCTTTCAATATTTATTAATGTAGAGATCGGAAGAGCGGTTCCAG    |
| chr8  | 113363354 | 113363393 | CSMD3_4121   | - | GTGACCTATGCACCAGACGTAGACTATAAAGTATTTACCCTAGAACCTAAAGTGTAATAAAGATCGGAAGAGCGGTTCCAG   |
| chr8  | 113364595 | 113364634 | CSMD3_4122   | - | GTGACCTATGCACCAGACGTTTTAAAGTTGTGGTTTTGATTTTTCATGGCCCTTTCAGAAATAGATCGGAAGAGCGGTTCCAG |
| chr8  | 113395746 | 113395785 | CSMD3_4123   | - | GTGACCTATGCACCAGACGTGAGCTGAGCTTAATTAATAACAGATATAATAGGAATATAGATCGGAAGAGCGGTTCCAG     |
| chr8  | 113402843 | 113402882 | CSMD3_4124   | - | GTGACCTATGCACCAGACGTTAAAGTTTTCTCTTTTCATTGTGTGTTAGTAAATCAGATCGGAAGAGCGGTTCCAG        |
| chr8  | 113418703 | 113418742 | CSMD3_4125   | - | GTGACCTATGCACCAGACGTAAATTTGTATGATCTGTGATATACATAGTTTATATAAAGATCGGAAGAGCGGTTCCAG      |
| chr8  | 113420497 | 113420536 | CSMD3_4126   | - | GTGACCTATGCACCAGACGTCTGTAGTCTAGAAACACACTAAGGAATGATATAATTTTCCAGATCGGAAGAGCGGTTCCAG   |
| chr8  | 113421098 | 113421137 | CSMD3_4127   | - | GTGACCTATGCACCAGACGTATAGAAGTCCATGCATCAGTTACTGATTAAGACTGACTAGATCGGAAGAGCGGTTCCAG     |
| chr8  | 113484770 | 113484809 | CSMD3_4128   | - | GTGACCTATGCACCAGACGTTTTGACTCATTATGTAGTATTTTCATCCAGACATGCTTTATAGATCGGAAGAGCGGTTCCAG  |
| chr8  | 113504668 | 113504707 | CSMD3_4129   | - | GTGACCTATGCACCAGACGTTATTTTTGGCTGAATTTTCATGATTAGAAAAAATCAAAAAGATCGGAAGAGCGGTTCCAG    |
| chr8  | 113515969 | 113516008 | CSMD3_4130   | - | GTGACCTATGCACCAGACGTACATCCATGTTAGTATCATGATTTAAATATAGATTTAGATCGGAAGAGCGGTTCCAG       |
| chr8  | 113518870 | 113518909 | CSMD3_4131   | - | GTGACCTATGCACCAGACGTATATATTTATTTCCACGTAAAAAATATATTTGTTAGCCAGATCGGAAGAGCGGTTCCAG     |
| chr8  | 113529213 | 113529252 | CSMD3_4132   | - | GTGACCTATGCACCAGACGTAAAGAACAAATTAATTTTATATAAACATAAAAAAATGGTTAGATCGGAAGAGCGGTTCCAG   |
| chr8  | 113562850 | 113562889 | CSMD3_4133   | - | GTGACCTATGCACCAGACGTTCAAAAAATTTCTCAATGCAAAATAGGAAGGTGATGTAAGATCGGAAGAGCGGTTCCAG     |
| chr8  | 113564773 | 113564812 | CSMD3_4134   | - | GTGACCTATGCACCAGACGTTTTCATTTTCTCAACATTACTAGGGAATCTGAAGTGCCTAAAGATCGGAAGAGCGGTTCCAG  |
| chr8  | 113568942 | 113568981 | CSMD3_4135   | - | GTGACCTATGCACCAGACGTGTCATAGATTTTCATTGAAATTTCTGTGAAAACTTTATCAGATCGGAAGAGCGGTTCCAG    |
| chr8  | 113585680 | 113585719 | CSMD3_4136   | - | GTGACCTATGCACCAGACGTAGAAGAGTAAATGCCCACAAACACTGGGGTCTGCTCATGTAAGATCGGAAGAGCGGTTCCAG  |
| chr8  | 113648996 | 113649035 | CSMD3_4137   | - | GTGACCTATGCACCAGACGTAGCTGCTTTTCATTGCTTGTATGTGTAGTCACTGTCCATGAGATCGGAAGAGCGGTTCCAG   |
| chr8  | 113650875 | 113650914 | CSMD3_4138   | - | GTGACCTATGCACCAGACGTAAAAACAAAAGGGCTCATTCAAGTAACTTTTAAAAAAGCAAGATCGGAAGAGCGGTTCCAG   |
| chr8  | 113657288 | 113657327 | CSMD3_4139   | - | GTGACCTATGCACCAGACGTTCATGAAATAATAATGGACTATCTTCTGAATTTTTCATTGAGATCGGAAGAGCGGTTCCAG   |
| chr8  | 113662340 | 113662379 | CSMD3_4140   | - | GTGACCTATGCACCAGACGTATTTGACATGCAAAAATGCTGATTTATAACAGAAAAATAGATCGGAAGAGCGGTTCCAG     |
| chr8  | 113668333 | 113668372 | CSMD3_4141   | - | GTGACCTATGCACCAGACGTATAAACTTTTTGATTTCTCATTCTGTTTTGCCCTACTTTAGATCGGAAGAGCGGTTCCAG    |
| chr8  | 113678456 | 113678495 | CSMD3_4142   | - | GTGACCTATGCACCAGACGTATATTTTTTCTACTTTTTAAAGAAAAATATCTAAAAAGATTAGATCGGAAGAGCGGTTCCAG  |
| chr8  | 113694621 | 113694660 | CSMD3_4143   | - | GTGACCTATGCACCAGACGTAGTGTAGTGAGAAATAGAACCTCATCATATTATGTACAAAGATCGGAAGAGCGGTTCCAG    |
| chr8  | 113697585 | 113697624 | CSMD3_4144   | - | GTGACCTATGCACCAGACGTGTTTCTGTTTTTTCCCATATAATATTTCTATAAATTTAGATCGGAAGAGCGGTTCCAG      |
| chr8  | 113702047 | 113702086 | CSMD3_4145   | - | GTGACCTATGCACCAGACGTAATGCTTTTCTTCCAGATAGCATATGTTACCCTGTCCTTGAGATCGGAAGAGCGGTTCCAG   |
| chr8  | 113812341 | 113812380 | CSMD3_4146   | - | GTGACCTATGCACCAGACGTATTTCTACATAGGAAATGTTATCTTAATACCACCAGAGAAAGATCGGAAGAGCGGTTCCAG   |
| chr8  | 113841865 | 113841904 | CSMD3_4147   | - | GTGACCTATGCACCAGACGTAATGTTTTCATTTGCTTAGCCCTACGGGTACTAATAAAGATCGGAAGAGCGGTTCCAG      |
| chr8  | 113871324 | 113871363 | CSMD3_4148   | - | GTGACCTATGCACCAGACGTACCATCTGTGATTTAAAAAAGCAATTAATCATAAAGACAGATCGGAAGAGCGGTTCCAG     |
| chr8  | 113933806 | 113933845 | CSMD3_4149   | - | GTGACCTATGCACCAGACGTATAATAATGCCCTCTGAACACATTTTAAATAGTTAACTTAGATCGGAAGAGCGGTTCCAG    |
| chr8  | 113959969 | 113960008 | CSMD3_4150   | - | GTGACCTATGCACCAGACGTAAATATTGACTTCATTATTTATCTTGTCAAGGTTTATTAGATCGGAAGAGCGGTTCCAG     |
| chr8  | 113966863 | 113966902 | CSMD3_4151   | - | GTGACCTATGCACCAGACGTTTTCTTTTTTGTACTTTCTCTAGTGCAGAGTGAAGTTTGTAGATCGGAAGAGCGGTTCCAG   |
| chr8  | 113988055 | 113988055 | CSMD3_4152   | - | GTGACCTATGCACCAGACGTTTATTTTCTTTGCCCCATTTAGTTACAGCCAAAGCTATAAGATCGGAAGAGCGGTTCCAG    |
| chr8  | 114031246 | 114031285 | CSMD3_4153   | - | GTGACCTATGCACCAGACGTGGAATTAACCTTTTCCCTTTTGGATGTAAAAATAATTTGGAGATCGGAAGAGCGGTTCCAG   |
| chr8  | 114110935 | 114110974 | CSMD3_4154   | - | GTGACCTATGCACCAGACGTAGCTTCTATTAACCTTGCATTGATGTTGTTGAAGCAAAGTAGATCGGAAGAGCGGTTCCAG   |
| chr8  | 114185901 | 114185940 | CSMD3_4155   | - | GTGACCTATGCACCAGACGTAACTTTAAAAATGAGAGTTGTTATCAGCCAGTGTATTTAGATCGGAAGAGCGGTTCCAG     |
| chr8  | 114290771 | 114290810 | CSMD3_4156   | - | GTGACCTATGCACCAGACGTGTAGTGGCAAACAAACACTGCCCTTAATGTAATTAACAAGATCGGAAGAGCGGTTCCAG     |
| chr8  | 114326750 | 114326789 | CSMD3_4157   | - | GTGACCTATGCACCAGACGTTTTGAATGGAAGACTGGAGAGAAAAATTTCTGGGTAAAAGATCGGAAGAGCGGTTCCAG     |
| chr8  | 114388917 | 114388956 | CSMD3_4158   | - | GTGACCTATGCACCAGACGTTGGCTCTTAGCTCCTTGGCCCCAACCTTCGGTCTTGTAGATCGGAAGAGCGGTTCCAG      |
| chr8  | 114448856 | 114448895 | CSMD3_4159   | - | GTGACCTATGCACCAGACGTTTTGGGGTCCCTCCGCTTTGGATGGAGTGGGTGGCTGACTAGATCGGAAGAGCGGTTCCAG   |
| chr19 | 1969722   | 1969761   | CSNK1G2_4160 | - | GTGACCTATGCACCAGACGTTACCCTGGCTCTCCACGGTGACTCTGCTGCCGTGCAAAATAGATCGGAAGAGCGGTTCCAG   |
| chr19 | 1978254   | 1978293   | CSNK1G2_4161 | - | GTGACCTATGCACCAGACGTAGAGACCATCAGCACCGCCAGCGCAGGGCCACCTAGCCAGATCGGAAGAGCGGTTCCAG     |
| chr19 | 1978391   | 1978430   | CSNK1G2_4162 | - | GTGACCTATGCACCAGACGTAAGAGCGAGTCACCAGGGGACCGGGTCCGCTGCCCTGAAATAGATCGGAAGAGCGGTTCCAG  |
| chr19 | 1978551   | 1978590   | CSNK1G2_4163 | - | GTGACCTATGCACCAGACGTGGACAGACGCAGCCGGGCTGCGGGCGGCAGCCCTCCCTGCAGATCGGAAGAGCGGTTCCAG   |
| chr19 | 1979268   | 1979307   | CSNK1G2_4164 | - | GTGACCTATGCACCAGACGTCTGTGGTCAAGCTTGTCTCCGCCCTCGCTCCCGCCAGATCGGAAGAGCGGTTCCAG        |
| chr19 | 1979701   | 1979740   | CSNK1G2_4165 | - | GTGACCTATGCACCAGACGTGGGAGCAGGGGTCAGGATGGGCTGCAGCGCCGGTTCATAGATCGGAAGAGCGGTTCCAG     |
| chr19 | 1979860   | 1979899   | CSNK1G2_4166 | - | GTGACCTATGCACCAGACGTCAGTAGGGGTACGCTGGCCGCCCATGCCCTCCCTGGGAGATCGGAAGAGCGGTTCCAG      |
| chr19 | 1980098   | 1980137   | CSNK1G2_4167 | - | GTGACCTATGCACCAGACGTGCAAGTGGCTCAGGTAGGAGACCGGGTGCAGGGCGGGGCAGATCGGAAGAGCGGTTCCAG    |
| chr5  | 138117564 | 138117603 | CTNNA1_4168  | - | GTGACCTATGCACCAGACGTGAACAACAAAGTCAAGTCAAGCAACACAAACATAGATCGGAAGAGCGGTTCCAG          |
| chr5  | 138118816 | 138118855 | CTNNA1_4169  | - | GTGACCTATGCACCAGACGTCAATTTTAACTAAACTGGAGTCAATAAATGACAACAGATCGGAAGAGCGGTTCCAG        |
| chr5  | 138145677 | 138145716 | CTNNA1_4170  | - | GTGACCTATGCACCAGACGTGAATGAAAACAAACTCAGCAAGAATGAACCTCAAAATACTAGATCGGAAGAGCGGTTCCAG   |
| chr5  | 138147822 | 138147861 | CTNNA1_4171  | - | GTGACCTATGCACCAGACGTAGAAAGACCCCAAAACCAAAATCTGAATGTAGGTTCTGAGATCGGAAGAGCGGTTCCAG     |
| chr5  | 138160169 | 138160208 | CTNNA1_4172  | - | GTGACCTATGCACCAGACGTAAATAAAACAAGAAATTTGGAGCACTTTTATATGGGCTTTAGATCGGAAGAGCGGTTCCAG   |
| chr5  | 138163154 | 138163193 | CTNNA1_4173  | - | GTGACCTATGCACCAGACGTAGTATACCAGATTTAGTACTCATCTCTGTTCCCTTCTAGATCGGAAGAGCGGTTCCAG      |
| chr5  | 138221851 | 138221890 | CTNNA1_4174  | - | GTGACCTATGCACCAGACGTGAAAGAGATGAGCATTTTATTTATCAAAAGAACTAGATCGGAAGAGCGGTTCCAG         |
| chr5  | 138223129 | 138223168 | CTNNA1_4175  | - | GTGACCTATGCACCAGACGTAATTTGAATAATTTGATTTTTTTTCCAAAAAGGTATTAGATCGGAAGAGCGGTTCCAG      |
| chr5  | 138239988 | 138240027 | CTNNA1_4176  | - | GTGACCTATGCACCAGACGTAATAAATCTTTAAAGATTTTTCTTTTTGACTGCTAAAGATCGGAAGAGCGGTTCCAG       |



|       |           |           |             |   |                                                                                     |
|-------|-----------|-----------|-------------|---|-------------------------------------------------------------------------------------|
| chr5  | 138253381 | 138253420 | CTNNA1_4177 | - | GTGACCTATGCACCAGACGTTATAAACTTCACTGTTTACTCTTTTCAGAGTCATGGCTAGATCGGAAGAGCGGTTTCAG     |
| chr5  | 138260149 | 138260188 | CTNNA1_4178 | - | GTGACCTATGCACCAGACGTAGCAAAAAGTTGAATGAGGAAGGAGGCTTTCTATGAAAAGAGATCGGAAGAGCGGTTTCAG   |
| chr5  | 138260895 | 138260934 | CTNNA1_4179 | - | GTGACCTATGCACCAGACGTAGAGGCACAGTAGATACCCTGGTCAGCAGGCAGCATCATTAGATCGGAAGAGCGGTTTCAG   |
| chr5  | 138264885 | 138264924 | CTNNA1_4180 | - | GTGACCTATGCACCAGACGTGACAAGATCACAGGTCAGACACATCTCTGGGCCACCAGCAGATCGGAAGAGCGGTTTCAG    |
| chr5  | 138266112 | 138266151 | CTNNA1_4181 | - | GTGACCTATGCACCAGACGTAAAGCACAAGAGACTCTTACATAAAAAAATATGAAGTTCTAGATCGGAAGAGCGGTTTCAG   |
| chr5  | 138266469 | 138266508 | CTNNA1_4182 | - | GTGACCTATGCACCAGACGTGGAAGAGAACAAGGATTATTGTATGTGAAGCCCCTCACAGAGATCGGAAGAGCGGTTTCAG   |
| chr5  | 138268217 | 138268256 | CTNNA1_4183 | - | GTGACCTATGCACCAGACGTGACAGGCTTAAACACCAAGTACTCTGGCCCTGCCCCAAGCACAGATCGGAAGAGCGGTTTCAG |
| chr5  | 138269441 | 138269480 | CTNNA1_4184 | - | GTGACCTATGCACCAGACGTGACAGGGGTGTAAGAAGCACCGGCCTGACCTCCAGCCTCAGATCGGAAGAGCGGTTTCAG    |
| chr2  | 38297815  | 38297854  | CYP1B1_4185 | - | GTGACCTATGCACCAGACGTGCAAGCTGAAATTTTAGAAATATTCACATCTTCGGAGATGAGATCGGAAGAGCGGTTTCAG   |
| chr2  | 38301439  | 38301478  | CYP1B1_4186 | - | GTGACCTATGCACCAGACGTTGGGAGGCGTGGGCCAGGCTTTTTCTCCTCTGAAAAGGCAGATCGGAAGAGCGGTTTCAG    |
| chr2  | 38298109  | 38298148  | CYP1B1_4187 | - | GTGACCTATGCACCAGACGTGCCTCATCAACAAGGACCTGACCAGCAGAGTGATGATTTTAGATCGGAAGAGCGGTTTCAG   |
| chr2  | 38301786  | 38301825  | CYP1B1_4188 | - | GTGACCTATGCACCAGACGTGCGCGGCCAGCCTGGTGGACGTGATGCCCTGGCTGCAGTAAGATCGGAAGAGCGGTTTCAG   |
| chr2  | 38302133  | 38302172  | CYP1B1_4189 | - | GTGACCTATGCACCAGACGTGCGCTTCCGCTGCTGGTGTCCGGCCGCGCAGCATCGGCTAGATCGGAAGAGCGGTTTCAG    |
| chr11 | 47236638  | 47236677  | DDB2_4190   | - | GTGACCTATGCACCAGACGTGTGTGAAGGGTACTGTGCTCTATGCGAAGATCATGGAGGAGATCGGAAGAGCGGTTTCAG    |
| chr11 | 47237837  | 47237876  | DDB2_4191   | - | GTGACCTATGCACCAGACGTGAACAGACATATTTCTCCTCCAATCTCACGAAAGGTTTTAGATCGGAAGAGCGGTTTCAG    |
| chr11 | 47238359  | 47238398  | DDB2_4192   | - | GTGACCTATGCACCAGACGTGAGAATGAATTAGGTTGAATTAACCCAAAGTTCTGGGTAGATCGGAAGAGCGGTTTCAG     |
| chr11 | 47254315  | 47254354  | DDB2_4193   | - | GTGACCTATGCACCAGACGTGAAGGAAAAGCCAGTGAGTGATGATGGGCCCTGGCCGTGAAGATCGGAAGAGCGGTTTCAG   |
| chr11 | 47256258  | 47256297  | DDB2_4194   | - | GTGACCTATGCACCAGACGTGAGCTGAGTTCCAGTGGGACACAGAACCAGAGTTGGGGTAGATCGGAAGAGCGGTTTCAG    |
| chr11 | 47256771  | 47256810  | DDB2_4195   | - | GTGACCTATGCACCAGACGTGAAAAGCCCCTGAGCTGAAGGAACCAAGCCCTCTGTGGAGATCGGAAGAGCGGTTTCAG     |
| chr11 | 47259338  | 47259377  | DDB2_4196   | - | GTGACCTATGCACCAGACGTGAGAGGCCGGCCATGAGGGTAAACACAGAACATGATCAAGAGATCGGAAGAGCGGTTTCAG   |
| chr11 | 47259639  | 47259678  | DDB2_4197   | - | GTGACCTATGCACCAGACGTAAAGAGTGTCAACATGAGGAGAGGGTGAAGGTATTAGCAGAAGATCGGAAGAGCGGTTTCAG  |
| chr11 | 47260301  | 47260340  | DDB2_4198   | - | GTGACCTATGCACCAGACGTTGAGACCAGTCTGACTTACACTTTCTGTTACCAATCTCTCAGATCGGAAGAGCGGTTTCAG   |
| chr7  | 137075916 | 137075955 | DGKI_4199   | - | GTGACCTATGCACCAGACGTGGGCAAAGAGGACATGAGCAAGCGTATCACATCGCCCTAGATCGGAAGAGCGGTTTCAG     |
| chr7  | 137080294 | 137080333 | DGKI_4200   | - | GTGACCTATGCACCAGACGTGAGTGAGTGCAACATCTCCCGCTGGGCGAGATCGAGATCGGAAGAGCGGTTTCAG         |
| chr7  | 137082073 | 137082112 | DGKI_4201   | - | GTGACCTATGCACCAGACGTCTTTTTATTACATAGTCTAGGTTATTTCTTCCAGAACATAAGATCGGAAGAGCGGTTTCAG   |
| chr7  | 137092571 | 137092610 | DGKI_4202   | - | GTGACCTATGCACCAGACGTATAGTGAACCTACCAAGGATCACTTACCTGTGAAATCCATAGATCGGAAGAGCGGTTTCAG   |
| chr7  | 137096866 | 137096905 | DGKI_4203   | - | GTGACCTATGCACCAGACGTTTCTACCAAATCTTTGGCGATGCTTTAAGAACTTTAATAGATCGGAAGAGCGGTTTCAG     |
| chr7  | 137128773 | 137128812 | DGKI_4204   | - | GTGACCTATGCACCAGACGTTCTGTCTTATTTATACCAATTCAGGATTGAAACTTGACCAGATCGGAAGAGCGGTTTCAG    |
| chr7  | 137148185 | 137148224 | DGKI_4205   | - | GTGACCTATGCACCAGACGTTCTGTCTTTCTTTCTCTGTGCCACTGTATTGCTGGGAGATCGGAAGAGCGGTTTCAG       |
| chr7  | 137150604 | 137150643 | DGKI_4206   | - | GTGACCTATGCACCAGACGTTTCTCCTGGCCTGTGAGGCTGGCCCTTAGGGTGACATCCATAGATCGGAAGAGCGGTTTCAG  |
| chr7  | 137151598 | 137151637 | DGKI_4207   | - | GTGACCTATGCACCAGACGTTTCCAGCCTGCTTGTGAAAGTGA AAAATTC CCAAGTTAATAGATCGGAAGAGCGGTTTCAG |
| chr7  | 137154246 | 137154285 | DGKI_4208   | - | GTGACCTATGCACCAGACGTCCTTTCTTGGGGATCGTGGGAGTTGGGGAAGTTGAAGAAGATCGGAAGAGCGGTTTCAG     |
| chr7  | 137170070 | 137170109 | DGKI_4209   | - | GTGACCTATGCACCAGACGTATTGACTCTCCTTTGTTTCTTACCTTCTGGCCAAATGAAGTAGATCGGAAGAGCGGTTTCAG  |
| chr7  | 137172306 | 137172345 | DGKI_4210   | - | GTGACCTATGCACCAGACGTTTAGCCAAATTTTTATTCTCTCAACTTTCCATTTTTGTAAGATCGGAAGAGCGGTTTCAG    |
| chr7  | 137206562 | 137206601 | DGKI_4211   | - | GTGACCTATGCACCAGACGTAGTGCCCTATTGATTTTACATCGCATAGCCTATCTTCCAGTATCGGAAGAGCGGTTTCAG    |
| chr7  | 137237065 | 137237104 | DGKI_4212   | - | GTGACCTATGCACCAGACGTTTCATGGCCTACCTTCTTAAACATGAAGACCTTGGAGAGGAAGATCGGAAGAGCGGTTTCAG  |
| chr7  | 137255871 | 137255910 | DGKI_4213   | - | GTGACCTATGCACCAGACGTTAACTGTTTTATTAATAAGAAATGTATTTAGTACAGAGAGATCGGAAGAGCGGTTTCAG     |
| chr7  | 137257461 | 137257500 | DGKI_4214   | - | GTGACCTATGCACCAGACGTTTTGATTGTTTCCCTTTGGTTTGAGCTGAACTCTGACTTGAAGATCGGAAGAGCGGTTTCAG  |
| chr7  | 137261918 | 137261957 | DGKI_4215   | - | GTGACCTATGCACCAGACGTAATATGTTGATTTATTAATTTGAATATGATGACTGCCAGATCGGAAGAGCGGTTTCAG      |
| chr7  | 137262966 | 137263005 | DGKI_4216   | - | GTGACCTATGCACCAGACGTATTTTATTCATAATTACTACATATTACTTATTGCCAATTAGATCGGAAGAGCGGTTTCAG    |
| chr7  | 137266546 | 137266585 | DGKI_4217   | - | GTGACCTATGCACCAGACGTCTCCCTTTCCATTTCCACAGGAGGAAGTTTCTAGCAGGAGATCGGAAGAGCGGTTTCAG     |
| chr7  | 137269905 | 137269944 | DGKI_4218   | - | GTGACCTATGCACCAGACGTTTTTTGTTCTGCAGAAAGGAGCCCTGGAGCATCTGCCTGAAGATCGGAAGAGCGGTTTCAG   |
| chr7  | 137271793 | 137271832 | DGKI_4219   | - | GTGACCTATGCACCAGACGTCCTCTCGGGACTGCCCATATCATCAAACAACAACCCGGATAGATCGGAAGAGCGGTTTCAG   |
| chr7  | 137282543 | 137282582 | DGKI_4220   | - | GTGACCTATGCACCAGACGTGAGAGAGAATCCAGTTCTCTGCCAATCTATCTTTCTTATAGATCGGAAGAGCGGTTTCAG    |
| chr7  | 137284519 | 137284558 | DGKI_4221   | - | GTGACCTATGCACCAGACGTAATATTCTCCATGGTCCATATGATTTTTAGGCAAGTGAGAGATCGGAAGAGCGGTTTCAG    |
| chr7  | 137293662 | 137293701 | DGKI_4222   | - | GTGACCTATGCACCAGACGTTTTTATCATTTTCAACTTTGCAAGTTTTGATAATTTCTGAAATCGGAAGAGCGGTTTCAG    |
| chr7  | 137304520 | 137304559 | DGKI_4223   | - | GTGACCTATGCACCAGACGTGGACTCTGGTCTGCTGGGCCAGTGCAGAGAAAATGAACAGATCGGAAGAGCGGTTTCAG     |
| chr7  | 137308179 | 137308218 | DGKI_4224   | - | GTGACCTATGCACCAGACGTGATGAAATAAAGCAATGTGGGCTCATGTTTTGCGAAATAAGATCGGAAGAGCGGTTTCAG    |
| chr7  | 137330168 | 137330207 | DGKI_4225   | - | GTGACCTATGCACCAGACGTAGCCACCTCATGGCCTCGCAGGAGGCTCCCCAGGCCTCTGAGATCGGAAGAGCGGTTTCAG   |
| chr7  | 137339428 | 137339467 | DGKI_4226   | - | GTGACCTATGCACCAGACGTGACAGCTTGATTCAAGTATCACCTTTGATTTCTCATTGAAGATCGGAAGAGCGGTTTCAG    |
| chr7  | 137341162 | 137341201 | DGKI_4227   | - | GTGACCTATGCACCAGACGTGCCCTTGTGCAGTTTTGTACATTTGCAAGTATTTGGTCAGATCGGAAGAGCGGTTTCAG     |
| chr7  | 137363253 | 137363292 | DGKI_4228   | - | GTGACCTATGCACCAGACGTGCTCCGCTTCTGGTGGGGAAGGCCCTGTGGATCTGAATGAAAAGATCGGAAGAGCGGTTTCAG |
| chr7  | 137374590 | 137374629 | DGKI_4229   | - | GTGACCTATGCACCAGACGTGCCTTTTTCATTTAAACATCACTTTCAGTGATGTTTTGTGTAGATCGGAAGAGCGGTTTCAG  |
| chr7  | 137531158 | 137531197 | DGKI_4230   | - | GTGACCTATGCACCAGACGTGGAGCCGGCAGCCGAGACAGGTGCGCCGCGGCGGGAGACCAGATCGGAAGAGCGGTTTCAG   |
| chr6  | 10983964  | 10984003  | ELOVL2_4231 | - | GTGACCTATGCACCAGACGTGAGAAAAGCACATATACTAGCCTAACAGATTGGCTTGTTAGATCGGAAGAGCGGTTTCAG    |
| chr6  | 10990501  | 10990540  | ELOVL2_4232 | - | GTGACCTATGCACCAGACGTCTCTTTTACTTTTTCTCCATGTGGCTTATGGATGGGGAAGATCGGAAGAGCGGTTTCAG     |
| chr6  | 10995190  | 10995229  | ELOVL2_4233 | - | GTGACCTATGCACCAGACGTTTGTAAATTTCCGTTTTGAGGAATGGCTTTAGAGACCAAGATCGGAAGAGCGGTTTCAG     |
| chr6  | 11000270  | 11000309  | ELOVL2_4234 | - | GTGACCTATGCACCAGACGTAGAAGCAATCAACCAACTATAACCAGTTCCTTACATGACAAAGATCGGAAGAGCGGTTTCAG  |

|       |           |           |             |   |                                                                                     |
|-------|-----------|-----------|-------------|---|-------------------------------------------------------------------------------------|
| chr6  | 11005555  | 11005594  | ELOVL2_4235 | - | GTGACCTATGCACCAGACGTGTAGCCAAAGCTGAAGTCCAGTAACTAGCAGTTTTTATAGATCGGAAGAGCGGTTTCAG     |
| chr6  | 11010929  | 11010968  | ELOVL2_4236 | - | GTGACCTATGCACCAGACGTTACTTGAGAACCTAATGTGGAAAGAACACAGGAAGAACACAGATCGGAAGAGCGGTTTCAG   |
| chr6  | 11044411  | 11044450  | ELOVL2_4237 | - | GTGACCTATGCACCAGACGTCCGCGCGCCGCCACCCGACCCGCCGCGCTTTCTTCTCTCAGATCGGAAGAGCGGTTTCAG    |
| chr12 | 132445115 | 132445154 | EP400_4238  | - | GTGACCTATGCACCAGACGTCTTCTGTATCCAATGTGTGCTTCTCTCTAAAATATAAATTAGATCGGAAGAGCGGTTTCAG   |
| chr12 | 132464192 | 132464231 | EP400_4239  | - | GTGACCTATGCACCAGACGTAAAAGATTGAAAAAATGAGATTTTGATCACTGAAGGCCATTAGATCGGAAGAGCGGTTTCAG  |
| chr12 | 132466588 | 132466627 | EP400_4240  | - | GTGACCTATGCACCAGACGTAGAAAAGTGCACAAAGCATTGATTTCCAAAGTGTGGCAGCTAGATCGGAAGAGCGGTTTCAG  |
| chr12 | 132471009 | 132471048 | EP400_4241  | - | GTGACCTATGCACCAGACGTGAGGGCACAAGTGGAGCAAGTGAAGAAAAGATGTCGGGGCAGATCGGAAGAGCGGTTTCAG   |
| chr12 | 132472200 | 132472239 | EP400_4242  | - | GTGACCTATGCACCAGACGTTACATGGGGGATGGTGGGGTCCGCATGTGATGAGTGTGTTAGATCGGAAGAGCGGTTTCAG   |
| chr12 | 132474459 | 132474498 | EP400_4243  | - | GTGACCTATGCACCAGACGTAAAGTGAAGAATTGTATGTTGTACTCTATGTCATGCTGGAGATCGGAAGAGCGGTTTCAG    |
| chr12 | 132475131 | 132475170 | EP400_4244  | - | GTGACCTATGCACCAGACGTAGGATTAATGAATAAGCACATTAAGGATGGGAATTAAGATCGGAAGAGCGGTTTCAG       |
| chr12 | 132475902 | 132475941 | EP400_4245  | - | GTGACCTATGCACCAGACGTAAGGAGCACAGTTCGTTCCCAAGGCCCCCATGCTTGGCGGAGATCGGAAGAGCGGTTTCAG   |
| chr12 | 132476668 | 132476707 | EP400_4246  | - | GTGACCTATGCACCAGACGTAGAAAAGAAAACCAAGCATGAGATCCAAACACTCGAAAGATCGGAAGAGCGGTTTCAG      |
| chr12 | 132479362 | 132479401 | EP400_4247  | - | GTGACCTATGCACCAGACGTTATCAGCAAGTGTCACTGAGAGGCAACACCATTGAGTGTAGATCGGAAGAGCGGTTTCAG    |
| chr12 | 132489572 | 132489611 | EP400_4248  | - | GTGACCTATGCACCAGACGTTTGGCGGCAGAAGGGCTGTTACTTTATAACAACAAGTGAAGATCGGAAGAGCGGTTTCAG    |
| chr12 | 132490607 | 132490646 | EP400_4249  | - | GTGACCTATGCACCAGACGTAATAAACACAGAGAAGTGAAGGGCCACTGAGAAAGCTTTATAAGATCGGAAGAGCGGTTTCAG |
| chr12 | 132491195 | 132491234 | EP400_4250  | - | GTGACCTATGCACCAGACGTGAACAAATAAAGAATTGACAGCTCGTCAAATAATCACCCAGATCGGAAGAGCGGTTTCAG    |
| chr12 | 132495993 | 132496032 | EP400_4251  | - | GTGACCTATGCACCAGACGTAAAACAGAAATTTCCAGCTCAAAGTATCTGTCATGTCCTCAAGATCGGAAGAGCGGTTTCAG  |
| chr12 | 132497504 | 132497543 | EP400_4252  | - | GTGACCTATGCACCAGACGTGAGAGACAGTCAAGTGCCTTCAACCTCCACTGTCTTTCAAGATCGGAAGAGCGGTTTCAG    |
| chr12 | 132497985 | 132498024 | EP400_4253  | - | GTGACCTATGCACCAGACGTGACAAGAGCAACAAGTGGAGTTCACAGCCACGGGGCTGGAGATCGGAAGAGCGGTTTCAG    |
| chr12 | 132498272 | 132498311 | EP400_4254  | - | GTGACCTATGCACCAGACGTAAGTGTACTGTTTTCTTTCCAAAATGCTGCTGTAAACAGATCGGAAGAGCGGTTTCAG      |
| chr12 | 132502030 | 132502069 | EP400_4255  | - | GTGACCTATGCACCAGACGTAGAAAGAAACACGAAGCATTCAATCCAAACGGCCATCGGAAGATCGGAAGAGCGGTTTCAG   |
| chr12 | 132502705 | 132502744 | EP400_4256  | - | GTGACCTATGCACCAGACGTAAGAAAAAAGTCTTGTCTGCATGAAGAGGGCAAAAAAAGCAGATCGGAAGAGCGGTTTCAG   |
| chr12 | 132504544 | 132504583 | EP400_4257  | - | GTGACCTATGCACCAGACGTATTGGTCCAGCAAGAATACAGATCAGACCCAGAAAGATCGGAAGAGCGGTTTCAG         |
| chr12 | 132505574 | 132505613 | EP400_4258  | - | GTGACCTATGCACCAGACGTTAAGGTTTGTGCAAGAGTGTGATAGGTTCTTAATAAAGATCGGAAGAGCGGTTTCAG       |
| chr12 | 132508272 | 132508311 | EP400_4259  | - | GTGACCTATGCACCAGACGTGAGAGGAAAAGTGAATTCAGATCATTGGAAAAATAGATCGGAAGAGCGGTTTCAG         |
| chr12 | 132510141 | 132510180 | EP400_4260  | - | GTGACCTATGCACCAGACGTAGGTCCACTAGGTGTCAATGACAGGCATGTGTACATACAAGATCGGAAGAGCGGTTTCAG    |
| chr12 | 132511932 | 132511971 | EP400_4261  | - | GTGACCTATGCACCAGACGTATAAAGGAAGAGGTGAAAAGGAAGCCCAAGTTCACAGGATAGATCGGAAGAGCGGTTTCAG   |
| chr12 | 132512512 | 132512551 | EP400_4262  | - | GTGACCTATGCACCAGACGTAAGTGTGATAAACAAGTACTTGAAGAACAGAAATGACAAGAGATCGGAAGAGCGGTTTCAG   |
| chr12 | 132514196 | 132514235 | EP400_4263  | - | GTGACCTATGCACCAGACGTGAAGCTGTTTTGTCCACCACGAGCCACACCTTCAAGATCGGAAGAGCGGTTTCAG         |
| chr12 | 132514484 | 132514523 | EP400_4264  | - | GTGACCTATGCACCAGACGTAATCACATCAAGAGCGCTCATTCCAGGCGCGTGCAGAGATCGGAAGAGCGGTTTCAG       |
| chr12 | 132516448 | 132516487 | EP400_4265  | - | GTGACCTATGCACCAGACGTACAAAACACAGGAGTTAGTATTCTGGAAAATGTTGGAAAGATCGGAAGAGCGGTTTCAG     |
| chr12 | 132522177 | 132522216 | EP400_4266  | - | GTGACCTATGCACCAGACGTAAGATGTAAGATGCTAAGTCAGTCACCAGGAAACACAGTGTAGATCGGAAGAGCGGTTTCAG  |
| chr12 | 132522448 | 132522487 | EP400_4267  | - | GTGACCTATGCACCAGACGTAGATGTGTGTTACTCCCCAGTACAAGTCCAAAGTGTGCATAGATCGGAAGAGCGGTTTCAG   |
| chr12 | 132527799 | 132527838 | EP400_4268  | - | GTGACCTATGCACCAGACGTTCTATGTTTAGTTCGCTTATAGATCTTTTAAATGAGGGAGATCGGAAGAGCGGTTTCAG     |
| chr12 | 132528140 | 132528179 | EP400_4269  | - | GTGACCTATGCACCAGACGTAGTATATTTTTGAATAGGGTTAATAGCAAGTAAATAAAAAGATCGGAAGAGCGGTTTCAG    |
| chr12 | 132528672 | 132528711 | EP400_4270  | - | GTGACCTATGCACCAGACGTGAGCAGCAAGAAGTTCAGGATCAGGAGTGCAGCTCAGAGAGATCGGAAGAGCGGTTTCAG    |
| chr12 | 132529166 | 132529205 | EP400_4271  | - | GTGACCTATGCACCAGACGTACGGCAAGCTCTGACTTCCACCAAGTCTCAGTGTATGATCGGAAGAGCGGTTTCAG        |
| chr12 | 132529295 | 132529334 | EP400_4272  | - | GTGACCTATGCACCAGACGTAAGGGAAGGCCATGAGATGTGGAACCTCACAGGAAGCTGCAGATCGGAAGAGCGGTTTCAG   |
| chr12 | 132529814 | 132529853 | EP400_4273  | - | GTGACCTATGCACCAGACGTAGGCAGTCTTCCAGCAAGAGAGTAAACCAGGAGATTCACAAAGATCGGAAGAGCGGTTTCAG  |
| chr12 | 132530222 | 132530261 | EP400_4274  | - | GTGACCTATGCACCAGACGTAGATTTCAAGTAAAACAGGTGAATACACTAAGTCAGAAAGATCGGAAGAGCGGTTTCAG     |
| chr12 | 132534818 | 132534857 | EP400_4275  | - | GTGACCTATGCACCAGACGTATTGACGAGAGTGCATCTGAATTAAGGCAGCATGGACAGACAGATCGGAAGAGCGGTTTCAG  |
| chr12 | 132535094 | 132535133 | EP400_4276  | - | GTGACCTATGCACCAGACGTGACAGTGTGACAGCAATTATAAATAAAGGAAATCTGAAGATCGGAAGAGCGGTTTCAG      |
| chr12 | 132537641 | 132537680 | EP400_4277  | - | GTGACCTATGCACCAGACGTGACGCAAGGTTAAAACATACAGGCAAGTTTAAGACAGAGATCGGAAGAGCGGTTTCAG      |
| chr12 | 132537838 | 132537877 | EP400_4278  | - | GTGACCTATGCACCAGACGTAGGAAGGAAGAGGAGCCACTGGAGGGGCAGACTCGGCCTGAGATCGGAAGAGCGGTTTCAG   |
| chr12 | 132539594 | 132539633 | EP400_4279  | - | GTGACCTATGCACCAGACGTAGGCGGGCATAAGGCAACAGCGCCAGGAAATGGGGTCCAGATCGGAAGAGCGGTTTCAG     |
| chr12 | 132546605 | 132546644 | EP400_4280  | - | GTGACCTATGCACCAGACGTCAAACAGGACCTCAAATAATTTTACACAGACACTCAGAGATCGGAAGAGCGGTTTCAG      |
| chr12 | 132546961 | 132547000 | EP400_4281  | - | GTGACCTATGCACCAGACGTGTTTGTCTATTAGTCTGGACAGGGATACTCGCCACCTTAGATCGGAAGAGCGGTTTCAG     |
| chr12 | 132549163 | 132549202 | EP400_4282  | - | GTGACCTATGCACCAGACGTAGCAAAGTATCTTCTTCAACATTAAGTGTGCTCCATTAGATCGGAAGAGCGGTTTCAG      |
| chr12 | 132551269 | 132551308 | EP400_4283  | - | GTGACCTATGCACCAGACGTGAAAATAATGGGAGAGTCCAGAGAAATTCAGGACACGGTATAGATCGGAAGAGCGGTTTCAG  |
| chr12 | 132551857 | 132551896 | EP400_4284  | - | GTGACCTATGCACCAGACGTCAAAAGCCCTTAGTCAAGCAGACTGGGAAAAGAGCTTGAAGATCGGAAGAGCGGTTTCAG    |
| chr12 | 132553990 | 132554029 | EP400_4285  | - | GTGACCTATGCACCAGACGTACTGCGAAATTAGGGCCGACAGACACTCCGCGCTCAAGAGATCGGAAGAGCGGTTTCAG     |
| chr12 | 132561011 | 132561050 | EP400_4286  | - | GTGACCTATGCACCAGACGTACAAAAGGCCAAAACATACAGATTCAAAGGAGTATGTGCAAGATCGGAAGAGCGGTTTCAG   |
| chr12 | 132561896 | 132561935 | EP400_4287  | - | GTGACCTATGCACCAGACGTAGAGTACAGAAAACACACTTGCACAGGAAACTCAGTCCAGAGATCGGAAGAGCGGTTTCAG   |
| chr12 | 132445560 | 132445599 | EP400_4288  | - | GTGACCTATGCACCAGACGTCTGCCCGGGCCGGACTGGGCTGCGTGGGACTCTGGGTGAGATCGGAAGAGCGGTTTCAG     |
| chr12 | 132446005 | 132446044 | EP400_4289  | - | GTGACCTATGCACCAGACGTAGCCAGGGGCCGGGGCAGCGGGCCGCTGCAGCACCTGAGATCGGAAGAGCGGTTTCAG      |
| chr1  | 22895732  | 22895771  | EPHA8_4290  | - | GTGACCTATGCACCAGACGTGGAGACAAGAGGGCATCAGGCCCTCTGACTTCTCCCAGAGATCGGAAGAGCGGTTTCAG     |
| chr1  | 22902660  | 22902699  | EPHA8_4291  | - | GTGACCTATGCACCAGACGTGAGGAACACAGCTACAGCAGACCCACCTCACCTAGATCGGAAGAGCGGTTTCAG          |
| chr1  | 22912923  | 22912962  | EPHA8_4292  | - | GTGACCTATGCACCAGACGTGAAGGCGGCTGCACATGAGCCAGAGCCACCCCTGGCTGAGATCGGAAGAGCGGTTTCAG     |

|       |          |          |            |   |                                                                                     |
|-------|----------|----------|------------|---|-------------------------------------------------------------------------------------|
| chr1  | 22915314 | 22915353 | EPHA8_4293 | - | GTGACCTATGCACCAGACGTAGGATGACAGATGGGGCAGTGGTTATTTATTTGGGCTGTGAGATCGGAAGAGCGGTTTCAG   |
| chr1  | 22919769 | 22919808 | EPHA8_4294 | - | GTGACCTATGCACCAGACGCTAATCCCCTGATGAGGCGGAGGAGACAAGGCGTGGCCAGATCGGAAGAGCGGTTTCAG      |
| chr1  | 22919967 | 22920006 | EPHA8_4295 | - | GTGACCTATGCACCAGACGTACGGTGGTCACTGGGCGCTGCTGGCCAGCCCCTCAGATCGGAAGAGCGGTTTCAG         |
| chr1  | 22921673 | 22921712 | EPHA8_4296 | - | GTGACCTATGCACCAGACGTAAGCCAGGGTTGGGGGACCAGGCTCTCAGCCCTGGCCTTGAGATCGGAAGAGCGGTTTCAG   |
| chr1  | 22922549 | 22922588 | EPHA8_4297 | - | GTGACCTATGCACCAGACGTGGGCACCGCCCTGCTGAGGCCAGGCCACCCCTAGCCCGGAGATCGGAAGAGCGGTTTCAG    |
| chr1  | 22923755 | 22923794 | EPHA8_4298 | - | GTGACCTATGCACCAGACGTGGAGGAGGGCCCTTCACTGGGGCCAGGAGAGATTGCTTTTAGATCGGAAGAGCGGTTTCAG   |
| chr1  | 22924119 | 22924158 | EPHA8_4299 | - | GTGACCTATGCACCAGACGTGAGAGAGGGTGTGGAGGGCCAGTGGGACCCCTGAAGATCGGAAGAGCGGTTTCAG         |
| chr1  | 22924594 | 22924633 | EPHA8_4300 | - | GTGACCTATGCACCAGACGTAGTAGGGAGAGGGTGGCTCTTGTTGGTGGGGCTCAGGGCTGAGATCGGAAGAGCGGTTTCAG  |
| chr1  | 22925281 | 22925320 | EPHA8_4301 | - | GTGACCTATGCACCAGACGTACATGGCTTGGACTTCAGGAAAGCCCGGGAGGCGCCTGGAGATCGGAAGAGCGGTTTCAG    |
| chr1  | 22927104 | 22927143 | EPHA8_4302 | - | GTGACCTATGCACCAGACGTACACAAGAGTTGAGGGGGCTGCCAGGCCTGGCAGGGTGTAGATCGGAAGAGCGGTTTCAG    |
| chr1  | 22927341 | 22927380 | EPHA8_4303 | - | GTGACCTATGCACCAGACGTTCAGCGCTGGGCTCAGCCCTCCCTCCCTGCACCTGAGGCAGATCGGAAGAGCGGTTTCAG    |
| chr1  | 22927743 | 22927782 | EPHA8_4304 | - | GTGACCTATGCACCAGACGTGGGGCTCTGGTAAGTGGCCAGAGGGTTCCGGAGGCTGGAAGATCGGAAGAGCGGTTTCAG    |
| chr1  | 22928070 | 22928109 | EPHA8_4305 | - | GTGACCTATGCACCAGACGTAGGGTGTCTGGCTGGCCAGCTGGGAGCTGGGAGGCTGGGAGCAGATCGGAAGAGCGGTTTCAG |
| chr1  | 22902992 | 22903031 | EPHA8_4306 | - | GTGACCTATGCACCAGACGTACCAAGGTGCGCACCTGTGAAGCTCTCGTGGCCGCAATAGATCGGAAGAGCGGTTTCAG     |
| chr1  | 22915568 | 22915607 | EPHA8_4307 | - | GTGACCTATGCACCAGACGTTAGTTCATGTGGCCAGCAGGTTGGCCACCAGCAGGCTGGAGATCGGAAGAGCGGTTTCAG    |
| chr1  | 23107864 | 23107903 | EPHB2_4308 | - | GTGACCTATGCACCAGACGTAGCAAAAGATCACCACCCCGCCCACTACCAGGCGCTGTAGATCGGAAGAGCGGTTTCAG     |
| chr1  | 23110835 | 23110874 | EPHB2_4309 | - | GTGACCTATGCACCAGACGTAATGCTGTCAGTGGGGAGTAAAGGCTCAGCCCCAGCAAGATCGGAAGAGCGGTTTCAG      |
| chr1  | 23189480 | 23189519 | EPHB2_4310 | - | GTGACCTATGCACCAGACGTAGCAAGGAGTCAACGAAACTGAGATGAAGACTCAGAAGATCGGAAGAGCGGTTTCAG       |
| chr1  | 23191320 | 23191359 | EPHB2_4311 | - | GTGACCTATGCACCAGACGTGAGAGGTTGTTGGTCACTGGGGGGCTCAGGGGTACTATTAGATCGGAAGAGCGGTTTCAG    |
| chr1  | 23208802 | 23208841 | EPHB2_4312 | - | GTGACCTATGCACCAGACGTGGCCAGAGGTCAGGGATCAGGGAGGCATGAGAAGTGCAGAGATCGGAAGAGCGGTTTCAG    |
| chr1  | 23219327 | 23219366 | EPHB2_4313 | - | GTGACCTATGCACCAGACGTACAGAGAAGAAAATTAGTGAGGTTGTGGCTCATAGTGGTAGATCGGAAGAGCGGTTTCAG    |
| chr1  | 23221915 | 23221954 | EPHB2_4314 | - | GTGACCTATGCACCAGACGTAGCATGGTAGGGCATTCTCAGCCTGGCTGTGGGAGTCGTAAGATCGGAAGAGCGGTTTCAG   |
| chr1  | 23222854 | 23222893 | EPHB2_4315 | - | GTGACCTATGCACCAGACGTAGCAAAAGGCTGGAGCCACTGAAGCGCCAGGGAGCTGAGATCGGAAGAGCGGTTTCAG      |
| chr1  | 23222857 | 23222896 | EPHB2_4316 | - | GTGACCTATGCACCAGACGTAAAGGCAAAAGGCTGAGCCACTGAAGCGCCAGGGAGAGCTCGGAAGAGCGGTTTCAG       |
| chr1  | 23232430 | 23232469 | EPHB2_4317 | - | GTGACCTATGCACCAGACGTAGACCAGGCTCTGTATATGGACTGACTCAAGATGCACACAGATCGGAAGAGCGGTTTCAG    |
| chr1  | 23233153 | 23233192 | EPHB2_4318 | - | GTGACCTATGCACCAGACGTAACACCAAGACAGACAGGATGTCACTTCCAGGTTGGAAGGAGATCGGAAGAGCGGTTTCAG   |
| chr1  | 23234396 | 23234435 | EPHB2_4319 | - | GTGACCTATGCACCAGACGTAGTGGGGAAAAACACAGAGTAAACAGAAGAGCAGGCATCAGAGATCGGAAGAGCGGTTTCAG  |
| chr1  | 23236825 | 23236864 | EPHB2_4320 | - | GTGACCTATGCACCAGACGTGACAGAGTGCAGTGGGGTGGGTGGATGGGCTGAGGGCGTAGATCGGAAGAGCGGTTTCAG    |
| chr1  | 23238887 | 23238926 | EPHB2_4321 | - | GTGACCTATGCACCAGACGTGGTGGGCGACAGATGGTCAGGCGACCTGTTTCAGGGAGATCGGAAGAGCGGTTTCAG       |
| chr1  | 23239905 | 23239944 | EPHB2_4322 | - | GTGACCTATGCACCAGACGTGAAGCAGCTGTGTTGGAAGAAATGCGGGTGAAGGGTCCAGATCGGAAGAGCGGTTTCAG     |
| chr1  | 23111177 | 23111216 | EPHB2_4323 | - | GTGACCTATGCACCAGACGTCCCAGTCCACCTGGGAGAAGCTCTCGTGGCTGCAATGGAGATCGGAAGAGCGGTTTCAG     |
| chr21 | 39755275 | 39755314 | ERG_4324   | - | GTGACCTATGCACCAGACGTGAGGCTTTTCCCATCAGCGTGCATTACCAGCCCATCGCCAGATCGGAAGAGCGGTTTCAG    |
| chr21 | 39762867 | 39762906 | ERG_4325   | - | GTGACCTATGCACCAGACGTGCTGATGTTTCTTCTTACAAAATTACTTTTTGGCAGTGAAGATCGGAAGAGCGGTTTCAG    |
| chr21 | 39763531 | 39763570 | ERG_4326   | - | GTGACCTATGCACCAGACGTGGGGCGCTGGGATAAACATAAGACAAGATTAGGCTCAGAGATCGGAAGAGCGGTTTCAG     |
| chr21 | 39764248 | 39764287 | ERG_4327   | - | GTGACCTATGCACCAGACGTGGCTCCCATGACCTGAGTTTTCATGTACAGGCATGGATGATCGGAAGAGCGGTTTCAG      |
| chr21 | 39772446 | 39772485 | ERG_4328   | - | GTGACCTATGCACCAGACGTACCCCTGTGTGATCTTCTTATTGAGAGACATCCCAGATGTAGATCGGAAGAGCGGTTTCAG   |
| chr21 | 39774429 | 39774468 | ERG_4329   | - | GTGACCTATGCACCAGACGTCCCCGCCCTGCTCCAGCAAGAGCGTAGGGTCTTACGTAGATCGGAAGAGCGGTTTCAG      |
| chr21 | 39775378 | 39775417 | ERG_4330   | - | GTGACCTATGCACCAGACGTCTTCTTCTCAAGGATAGATGGCTGTGGCTATGGTCTTATAGATCGGAAGAGCGGTTTCAG    |
| chr21 | 39795282 | 39795321 | ERG_4331   | - | GTGACCTATGCACCAGACGTACAGCTTCACTGCCCTCGGCAGATCGCAACTTCCCAGAGATCGGAAGAGCGGTTTCAG      |
| chr21 | 39817277 | 39817316 | ERG_4332   | - | GTGACCTATGCACCAGACGTGTTCCGCCCTTCTCCTCCCTGACCTCCCATTTCTATCCAGATCGGAAGAGCGGTTTCAG     |
| chr21 | 39870237 | 39870276 | ERG_4333   | - | GTGACCTATGCACCAGACGTGGTTTCTTCTTAAATTTGACAAAATCTTGTCTTACTTAGATCGGAAGAGCGGTTTCAG      |
| chr21 | 39947536 | 39947575 | ERG_4334   | - | GTGACCTATGCACCAGACGTCTTGGCTGGGAAGCCAGCTCTGCCCTTCTCTGTGCCTAGAGATCGGAAGAGCGGTTTCAG    |
| chr21 | 39755535 | 39755574 | ERG_4335   | - | GTGACCTATGCACCAGACGTGGCCCTCCAGCCCAACCCCGGAGTATCTCTGTACAAGAGATCGGAAGAGCGGTTTCAG      |
| chr11 | 44129213 | 44129252 | EXT2_4336  | - | GTGACCTATGCACCAGACGTACAGCCTTCTCCTCACACTCCTGGTACCAGGGAGAGAAAAGATCGGAAGAGCGGTTTCAG    |
| chr11 | 44130694 | 44130733 | EXT2_4337  | - | GTGACCTATGCACCAGACGTATTTAAATGTAGGAGAATTAAGTGTCAACTATGAAAAGAGATCGGAAGAGCGGTTTCAG     |
| chr11 | 44135685 | 44135724 | EXT2_4338  | - | GTGACCTATGCACCAGACGTAGTATTTTGTAAACAGATGAAAGAAAGGACTTTTATTCTAGATCGGAAGAGCGGTTTCAG    |
| chr11 | 44146289 | 44146328 | EXT2_4339  | - | GTGACCTATGCACCAGACGTAAAAAACAGGTGATTGGAAAATTGCAGCTGGTATGTTAGTAGATCGGAAGAGCGGTTTCAG   |
| chr11 | 44148316 | 44148355 | EXT2_4340  | - | GTGACCTATGCACCAGACGTACAAAGAGGCAAGAGATTACAACTAGTTTTGCTGATCCAAGATCGGAAGAGCGGTTTCAG    |
| chr11 | 44151545 | 44151584 | EXT2_4341  | - | GTGACCTATGCACCAGACGTACAGAAAACAGTTTACATACACACAGCCCTTACAGAAAAGAGATCGGAAGAGCGGTTTCAG   |
| chr11 | 44193111 | 44193150 | EXT2_4342  | - | GTGACCTATGCACCAGACGTAATAATGCTGTTTTAAGTAGCAAGCGACAGAGTGGGAAGATCGGAAGAGCGGTTTCAG      |
| chr11 | 44219329 | 44219368 | EXT2_4343  | - | GTGACCTATGCACCAGACGTACAGATTAACACGGGTCAGAAAAGCAGCTGTAACAATATGAGATCGGAAGAGCGGTTTCAG   |
| chr11 | 44228293 | 44228332 | EXT2_4344  | - | GTGACCTATGCACCAGACGTAGAAAAGGTTATTACTTATCTTCTTAACTTTTGTGAGGAGAAGATCGGAAGAGCGGTTTCAG  |
| chr11 | 44253853 | 44253892 | EXT2_4345  | - | GTGACCTATGCACCAGACGTACACATAATAAACAATCAAGTCCCAATTGACAGCAACCAAGATCGGAAGAGCGGTTTCAG    |
| chr11 | 44255615 | 44255654 | EXT2_4346  | - | GTGACCTATGCACCAGACGTAGACAGAAAAGAAGAAATATTCAAAAATAGCAGTTCCCTTTAGATCGGAAGAGCGGTTTCAG  |
| chr11 | 44257793 | 44257832 | EXT2_4347  | - | GTGACCTATGCACCAGACGTAGGACAAAACATACCTGGCTGTCAAGTGTCAAGGACAATAAGATCGGAAGAGCGGTTTCAG   |
| chr11 | 44265649 | 44265688 | EXT2_4348  | - | GTGACCTATGCACCAGACGTTGGAGAGGAGTGGGGAGGAGGGGTTTGGAGCAATGAGAAGATCGGAAGAGCGGTTTCAG     |
| chr11 | 44129481 | 44129520 | EXT2_4349  | - | GTGACCTATGCACCAGACGTGCTGCAACTGAGATCCCCCGCTGCGGATGGGACTGTGAGATCGGAAGAGCGGTTTCAG      |
| chr9  | 97863939 | 97863978 | FANCC_4350 | - | GTGACCTATGCACCAGACGTGGCCGTGTGGGTGCCCGGCTGAGGGATCAGGCTCCAGAGATCGGAAGAGCGGTTTCAG      |

|      |          |          |            |   |                                                                                     |
|------|----------|----------|------------|---|-------------------------------------------------------------------------------------|
| chr9 | 97869328 | 97869337 | FANCC_4351 | - | GTGACCTATGCACCAGACGTCTGTGGTCCAGCATCCTAGTACTCATTCTTCTGCCAGGCGAGATCGGAAGAGCGGTTTCAG   |
| chr9 | 97873695 | 97873734 | FANCC_4352 | - | GTGACCTATGCACCAGACGTGGCCCCACTGCATGTGTTTTGGGGTGGGCTCTGGGGGGCTGAGATCGGAAGAGCGGTTTCAG  |
| chr9 | 97876861 | 97876900 | FANCC_4353 | - | GTGACCTATGCACCAGACGTACTGACCACTCCCAAACTACTTCACACATGGTTTTCCCTAAGATCGGAAGAGCGGTTTCAG   |
| chr9 | 97879547 | 97879586 | FANCC_4354 | - | GTGACCTATGCACCAGACGTGTTGACTTTGCCACATCAGAATGATTTCTGGGAAGAGCAGATCGGAAGAGCGGTTTCAG     |
| chr9 | 97887318 | 97887357 | FANCC_4355 | - | GTGACCTATGCACCAGACGTTCACATATATTACTATTCCAGAAATAAGACGCTGAGATCGGAAGAGCGGTTTCAG         |
| chr9 | 97888761 | 97888800 | FANCC_4356 | - | GTGACCTATGCACCAGACGTCACTGTTTTCTTAGTAATTGATGAAAAAGGTTCCATTAGATCGGAAGAGCGGTTTCAG      |
| chr9 | 97897578 | 97897617 | FANCC_4357 | - | GTGACCTATGCACCAGACGTGGTTTTGATGAAGGGAAAACTTGAAGGAGATGCTTGGAGATCGGAAGAGCGGTTTCAG      |
| chr9 | 97912155 | 97912194 | FANCC_4358 | - | GTGACCTATGCACCAGACGTAATGTTTTCTGTCTCCTGCGTCTGTTTTCTTTTTCTTAGAGATCGGAAGAGCGGTTTCAG    |
| chr9 | 97933311 | 97933350 | FANCC_4359 | - | GTGACCTATGCACCAGACGTAACATAACATCTTCTTCTCAGGTTTTCAAATGTATCAGTAGATCGGAAGAGCGGTTTCAG    |
| chr9 | 97934269 | 97934308 | FANCC_4360 | - | GTGACCTATGCACCAGACGTAAAATTTATCACTTTTGAATGTTAATGCTGAATGTGCCAGATCGGAAGAGCGGTTTCAG     |
| chr9 | 98002881 | 98002920 | FANCC_4361 | - | GTGACCTATGCACCAGACGTAAATCTTGCTCTGCACCTCTTTGAATTAATGATTATTTAGATCGGAAGAGCGGTTTCAG     |
| chr9 | 98009664 | 98009703 | FANCC_4362 | - | GTGACCTATGCACCAGACGTAAAACGTGCTCTCAAATGGCTATTTAATCTTTGCATAGATCGGAAGAGCGGTTTCAG       |
| chr9 | 98011359 | 98011398 | FANCC_4363 | - | GTGACCTATGCACCAGACGTGACCAAGATAAATAAATTTTTCTGACCTCAGGGACTCTAGATCGGAAGAGCGGTTTCAG     |
| chr9 | 35074055 | 35074094 | FANCC_4364 | - | GTGACCTATGCACCAGACGTTTTGAAGAGCTTGAGCTGGGTCCCCAGTGGGCTGTCTCTAGATCGGAAGAGCGGTTTCAG    |
| chr9 | 35074318 | 35074357 | FANCC_4365 | - | GTGACCTATGCACCAGACGTGGCCTGCTGGCTTGGGGCTGAGGGGCAGTTGGTGTCTAGAGATCGGAAGAGCGGTTTCAG    |
| chr9 | 35074874 | 35074913 | FANCC_4366 | - | GTGACCTATGCACCAGACGTTTGCATGACGTGCGCTATGCATAGATGTGCAAGGACAGAGATCGGAAGAGCGGTTTCAG     |
| chr9 | 35075226 | 35075265 | FANCC_4367 | - | GTGACCTATGCACCAGACGTCTTTCAAGTTTTCTTACCTCTGGAAGTGGTAGTGGTGGATCGGAAGAGCGGTTTCAG       |
| chr9 | 35075412 | 35075451 | FANCC_4368 | - | GTGACCTATGCACCAGACGTGGCTCCTAGAGGGGGTGGAGGATGATTTTTCTGATTGGAGATCGGAAGAGCGGTTTCAG     |
| chr9 | 35075909 | 35075948 | FANCC_4369 | - | GTGACCTATGCACCAGACGTTCAAGCTTCTGCAATGGGGTAGACGGGTTGGTGTCCAGATCGGAAGAGCGGTTTCAG       |
| chr9 | 35076379 | 35076418 | FANCC_4370 | - | GTGACCTATGCACCAGACGTCTTGTCTCACCTGAGCTTCTTCCCCTTCTGATGCTCAGATCGGAAGAGCGGTTTCAG       |
| chr9 | 35076671 | 35076710 | FANCC_4371 | - | GTGACCTATGCACCAGACGTGCCAGTGAAGATGTGGGGTGGAGGATTCTGAGGTGCTTAGATCGGAAGAGCGGTTTCAG     |
| chr9 | 35076918 | 35076957 | FANCC_4372 | - | GTGACCTATGCACCAGACGTTCTAGGGTGGATTGGGAAACCAGAAGCATTATGTATAGATCGGAAGAGCGGTTTCAG       |
| chr9 | 35077211 | 35077250 | FANCC_4373 | - | GTGACCTATGCACCAGACGTAACCTGACTCATCTTCTACCTTTAAGTGGTCTCCAGAAGATCGGAAGAGCGGTTTCAG      |
| chr9 | 35078088 | 35078127 | FANCC_4374 | - | GTGACCTATGCACCAGACGTAAAGTGACCTGAAGCTGAGGGTCTCCCTCTCCATAGATCGGAAGAGCGGTTTCAG         |
| chr9 | 35078552 | 35078591 | FANCC_4375 | - | GTGACCTATGCACCAGACGTGAGATTGTCCCTGATTCCCCTGCCATCTTCACTCTGGGTTAGATCGGAAGAGCGGTTTCAG   |
| chr9 | 35079098 | 35079137 | FANCC_4376 | - | GTGACCTATGCACCAGACGTCTCCCCAGGATGGTCAGTCCCCTTCCATAGCCAGAGATCGGAAGAGCGGTTTCAG         |
| chr9 | 35079388 | 35079427 | FANCC_4377 | - | GTGACCTATGCACCAGACGTTGCTGGCACCTCGGTTTGCAGCCTCAAGATCCCTGAAAGAGATCGGAAGAGCGGTTTCAG    |
| chr1 | 11167492 | 11167531 | MTOR_4378  | - | GTGACCTATGCACCAGACGTAGATGTGCCCATCACTGTTTTTCTGAGGCTTTTGTACTTTAGATCGGAAGAGCGGTTTCAG   |
| chr1 | 11168188 | 11168227 | MTOR_4379  | - | GTGACCTATGCACCAGACGTCTCTCAAAGTACTTTTAAATAAGCAATCAGTCCCAGATCGGAAGAGCGGTTTCAG         |
| chr1 | 11169297 | 11169336 | MTOR_4380  | - | GTGACCTATGCACCAGACGTATGTGTTTTACTTAAAGGGACATAAAATCTGACACACTAGATCGGAAGAGCGGTTTCAG     |
| chr1 | 11169656 | 11169695 | MTOR_4381  | - | GTGACCTATGCACCAGACGTCTCTGAGGAACCCGACCAAGTACTAGCTCATTAAAGAAAAGATCGGAAGAGCGGTTTCAG    |
| chr1 | 11172859 | 11172898 | MTOR_4382  | - | GTGACCTATGCACCAGACGTCCACGGGAGGTGCAAAAGGCTCTCCCCTTGTGCAGAGTGAGATCGGAAGAGCGGTTTCAG    |
| chr1 | 11174820 | 11174859 | MTOR_4383  | - | GTGACCTATGCACCAGACGTATCGGAACGAGTCTCTCAAATGGGATCAGGACAGTTAAGATCGGAAGAGCGGTTTCAG      |
| chr1 | 11175403 | 11175442 | MTOR_4384  | - | GTGACCTATGCACCAGACGTGTTCTAGAACCCCACTCATCTCCCGGGTATCATTAGATCGGAAGAGCGGTTTCAG         |
| chr1 | 11177011 | 11177050 | MTOR_4385  | - | GTGACCTATGCACCAGACGTTAATTTGGTTTTTGTAGTCTTCTTCTCCATTGTAGTTTTAGATCGGAAGAGCGGTTTCAG    |
| chr1 | 11181253 | 11181292 | MTOR_4386  | - | GTGACCTATGCACCAGACGTGGGCCCTGCAGACCTGCGCTCTCTGGAACCCCACTCGCAGATCGGAAGAGCGGTTTCAG     |
| chr1 | 11181986 | 11182025 | MTOR_4387  | - | GTGACCTATGCACCAGACGTGGCCACGAGAGCTAGTGCCCTTCCGTGGCAGGAATCTAGATCGGAAGAGCGGTTTCAG      |
| chr1 | 11184505 | 11184544 | MTOR_4388  | - | GTGACCTATGCACCAGACGTACCCTGAAATGGCAACAATTTGAGAAGTCTTCTGGTTTTAGATCGGAAGAGCGGTTTCAG    |
| chr1 | 11186629 | 11186668 | MTOR_4389  | - | GTGACCTATGCACCAGACGTTTGTGCACTTCTGTCAACCACTTCTCCCTCTACACTGGCAGATCGGAAGAGCGGTTTCAG    |
| chr1 | 11187017 | 11187056 | MTOR_4390  | - | GTGACCTATGCACCAGACGTGAGGCTCCTGGCAGGGTAACTGTCAATTAGTCTTTCTAGATCGGAAGAGCGGTTTCAG      |
| chr1 | 11187631 | 11187670 | MTOR_4391  | - | GTGACCTATGCACCAGACGTAAAACAGCAAAAGGACATAAACCCCTGTAGAAATATTCTGCCAGATCGGAAGAGCGGTTTCAG |
| chr1 | 11188011 | 11188050 | MTOR_4392  | - | GTGACCTATGCACCAGACGTGCCACTGTGGGGCTTCATAGACCCTGGTCCCTTAGCTGGTATAGATCGGAAGAGCGGTTTCAG |
| chr1 | 11188461 | 11188500 | MTOR_4393  | - | GTGACCTATGCACCAGACGTACTCTGGGCAGTTTCTCATCTAACCACTGGTTTGGTGGTTCAGATCGGAAGAGCGGTTTCAG  |
| chr1 | 11188862 | 11188901 | MTOR_4394  | - | GTGACCTATGCACCAGACGTTTGGTTACAGGTAAGGTGGCTCCAAGTCTCTTCTGTGAGATCGGAAGAGCGGTTTCAG      |
| chr1 | 11189745 | 11189784 | MTOR_4395  | - | GTGACCTATGCACCAGACGTAGGGAAGGATGCAACTCTGGTAGGCCATGTTAATGGCAAGAGATCGGAAGAGCGGTTTCAG   |
| chr1 | 11190536 | 11190575 | MTOR_4396  | - | GTGACCTATGCACCAGACGTCTTCTTCTTATAACCAACCAAGGTCAGAGGCTCAGATCGGAAGAGCGGTTTCAG          |
| chr1 | 11193087 | 11193126 | MTOR_4397  | - | GTGACCTATGCACCAGACGTGCAGGCCACCTGTGAGACCAACCAACCTGGCTGGCTCGTGGATCGGAAGAGCGGTTTCAG    |
| chr1 | 11194358 | 11194397 | MTOR_4398  | - | GTGACCTATGCACCAGACGTCACTGACCTGGGGCAAGTCATATCCAGCCCTGTCCAGATCGGAAGAGCGGTTTCAG        |
| chr1 | 11199311 | 11199350 | MTOR_4399  | - | GTGACCTATGCACCAGACGTCAATGCATCCAGAACAGACCACCTTCTCCAGAATGCTCGCAGATCGGAAGAGCGGTTTCAG   |
| chr1 | 11199540 | 11199579 | MTOR_4400  | - | GTGACCTATGCACCAGACGTACCACCCACACATGGGCAGGTAGGCCCCATGGTGTCCAGATCGGAAGAGCGGTTTCAG      |
| chr1 | 11204655 | 11204694 | MTOR_4401  | - | GTGACCTATGCACCAGACGTTAGAAAGCCCAAGTTCACCACTTACCCTTCCCAAGATCGGAAGAGCGGTTTCAG          |
| chr1 | 11204975 | 11205014 | MTOR_4402  | - | GTGACCTATGCACCAGACGTACTATTCTGACAGCTTATTCTTTGAGGCTTATTTCCATAGATCGGAAGAGCGGTTTCAG     |
| chr1 | 11206683 | 11206722 | MTOR_4403  | - | GTGACCTATGCACCAGACGTACATGCACCCAGATCTCTCAGTGAGGAAAAGATTGTAGTGAGATCGGAAGAGCGGTTTCAG   |
| chr1 | 11210133 | 11210172 | MTOR_4404  | - | GTGACCTATGCACCAGACGTCTCACAGGCACCTGTGAAGGATGGGGTAGTGAGGCTAAGATCGGAAGAGCGGTTTCAG      |
| chr1 | 11217159 | 11217198 | MTOR_4405  | - | GTGACCTATGCACCAGACGTTAGAATGATGGCATGTGTGGCTCAAGAGACTTGTCTCTAGATCGGAAGAGCGGTTTCAG     |
| chr1 | 11227449 | 11227488 | MTOR_4406  | - | GTGACCTATGCACCAGACGTACTTCTTTGGAAAAGCAGGAGGTAGAGACTTGGCTAGGAGATCGGAAGAGCGGTTTCAG     |
| chr1 | 11259265 | 11259304 | MTOR_4407  | - | GTGACCTATGCACCAGACGTAACCTTTTTAATTGCTGCTCATGCAAAATGACCTCAGATCGGAAGAGCGGTTTCAG        |
| chr1 | 11259548 | 11259587 | MTOR_4408  | - | GTGACCTATGCACCAGACGTTCCCAATTGCTCCAGATGGAGGACAGGGAACCACTGGAGATCGGAAGAGCGGTTTCAG      |

|      |           |           |            |   |                                                                                          |
|------|-----------|-----------|------------|---|------------------------------------------------------------------------------------------|
| chr1 | 11264568  | 11264607  | MTOR_4409  | - | GTGACCTATGCACCAGACGTTTCAGGGCGGGTGGAGAAGATCAGCACATAGAAAACGATATAGATCGGAAGAGCGGTTTCAG       |
| chr1 | 11269319  | 11269358  | MTOR_4410  | - | GTGACCTATGCACCAGACGTTGTTTCAGGTGACTGGGAAAGGAGAGCTCTGCTCTTCTCAAGATCGGAAGAGCGGTTTCAG        |
| chr1 | 11270821  | 11270860  | MTOR_4411  | - | GTGACCTATGCACCAGACGTTCTTTCTTTCTGTTCTGAAGTCCCTGTTGTCTTTACTACTTAGATCGGAAGAGCGGTTTCAG       |
| chr1 | 11272319  | 11272358  | MTOR_4412  | - | GTGACCTATGCACCAGACGTAGTCTGGACAGACAGGTGCTCTTCTGCCTTATTGGAAAGAGATCGGAAGAGCGGTTTCAG         |
| chr1 | 11272803  | 11272842  | MTOR_4413  | - | GTGACCTATGCACCAGACGTCCTCTTTGGGACTAGCAATCTTTAAGCTTTAATGTTTTGTAGATCGGAAGAGCGGTTTCAG        |
| chr1 | 11273406  | 11273445  | MTOR_4414  | - | GTGACCTATGCACCAGACGTTACGTCACTCCAGAGAGATTTTCTGATTTCTCTGAGTAGATCGGAAGAGCGGTTTCAG           |
| chr1 | 11276155  | 11276194  | MTOR_4415  | - | GTGACCTATGCACCAGACGTTGTAATGCTTTGGCCCTTTCCATCTTCCGTTTGGGTCAAGGAAGAGATCGGAAGAGCGGTTTCAG    |
| chr1 | 11288675  | 11288714  | MTOR_4416  | - | GTGACCTATGCACCAGACGTCAAAACCCCAATCCTTCTCTTCTCCTCTGCACCACACATGAGATCGGAAGAGCGGTTTCAG        |
| chr1 | 11290932  | 11290971  | MTOR_4417  | - | GTGACCTATGCACCAGACGTTGGTAGCCATGAAAGACTTGCCAAGTTCTCACTCACAGAGCAGATCGGAAGAGCGGTTTCAG       |
| chr1 | 11291307  | 11291346  | MTOR_4418  | - | GTGACCTATGCACCAGACGTTGGCAAACCTTGGTCTTTAAAGACTTTGCTGGGACGATGGCAGATCGGAAGAGCGGTTTCAG       |
| chr1 | 11293405  | 11293444  | MTOR_4419  | - | GTGACCTATGCACCAGACGTAGCTACTTTTTCCATAGCGGAGATAGGGTGGAAAAGAAAACAGATCGGAAGAGCGGTTTCAG       |
| chr1 | 11294150  | 11294189  | MTOR_4420  | - | GTGACCTATGCACCAGACGTTCCGAGAGGCTGGTCTTCTGTGCGTGTGCATCAGCTCAGATCGGAAGAGCGGTTTCAG           |
| chr1 | 11297850  | 11297889  | MTOR_4421  | - | GTGACCTATGCACCAGACGTTGATGGCCAGACCCACAGGCAAGGGAAGACAGGACTCTCGCAGATCGGAAGAGCGGTTTCAG       |
| chr1 | 11298409  | 11298448  | MTOR_4422  | - | GTGACCTATGCACCAGACGTTCCAGACAGAAGAACTAGGGGAGTTAAGGAGCTTAGGACAGATCGGAAGAGCGGTTTCAG         |
| chr1 | 11300310  | 11300349  | MTOR_4423  | - | GTGACCTATGCACCAGACGTACAACGGCTCTTGCCAAGATAGTGAGAGATGCTGAAAACATAGATCGGAAGAGCGGTTTCAG       |
| chr1 | 11301560  | 11301599  | MTOR_4424  | - | GTGACCTATGCACCAGACGTTGAAACCTGAGCTTGCCCTGTATCAGCGTAGGCTTGGCCAGATCGGAAGAGCGGTTTCAG         |
| chr1 | 11303121  | 11303160  | MTOR_4425  | - | GTGACCTATGCACCAGACGTTCTGTTATGATTTACCTTCCACTCCATTTGGTTGGAGAGGATCGGAAGAGCGGTTTCAG          |
| chr1 | 11307632  | 11307671  | MTOR_4426  | - | GTGACCTATGCACCAGACGTTGATGGAGATTCATTACCCTCAGGGTAAACAGGGAAGATCGGAAGAGCGGTTTCAG             |
| chr1 | 11307826  | 11307865  | MTOR_4427  | - | GTGACCTATGCACCAGACGTAGAGGCCCTTTCCCTCTTTTCTTAAGCTCCACACCTCACTAGATCGGAAGAGCGGTTTCAG        |
| chr1 | 11315999  | 11316038  | MTOR_4428  | - | GTGACCTATGCACCAGACGTGGCTCCATTCCCACCCTAGCAAAGCACATCTGCGTAGAGAGATCGGAAGAGCGGTTTCAG         |
| chr1 | 11316940  | 11316979  | MTOR_4429  | - | GTGACCTATGCACCAGACGTACAGGGAGGACACAGCCAGGCTTGGGGAACGATGGTGTGATCGGAAGAGCGGTTTCAG           |
| chr1 | 11318492  | 11318531  | MTOR_4430  | - | GTGACCTATGCACCAGACGTAGTCTCTGGTCAAAAAACAACACACTCACCTTTGTGCCAGATCGGAAGAGCGGTTTCAG          |
| chr1 | 11319255  | 11319294  | MTOR_4431  | - | GTGACCTATGCACCAGACGTGATCTGGGCGGCTATTGTGGGATGTGGGCTAAATGATAGATCGGAAGAGCGGTTTCAG           |
| chrX | 48649467  | 48649506  | GATA1_4432 | - | GTGACCTATGCACCAGACGTGGGATTAAGCTGACAGCAGGAGGGTCTCTCAGACACAGATCGGAAGAGCGGTTTCAG            |
| chrX | 48650201  | 48650240  | GATA1_4433 | - | GTGACCTATGCACCAGACGTCAAGGTAGGGATGGAGGAAAGAAGAGGCAAAATCAGTCTAGAGATCGGAAGAGCGGTTTCAG       |
| chrX | 48650680  | 48650719  | GATA1_4434 | - | GTGACCTATGCACCAGACGTGGAGAGGAGAAGAGGGAGCTAGGCTCAGCTCAGCTTTACTAGATCGGAAGAGCGGTTTCAG        |
| chrX | 48651529  | 48651568  | GATA1_4435 | - | GTGACCTATGCACCAGACGTACAGGATGTGAGATCAGTCCCTGGGGATGTGGAAGTGGGAGATCGGAAGAGCGGTTTCAG         |
| chrX | 48652150  | 48652189  | GATA1_4436 | - | GTGACCTATGCACCAGACGTGGAGGCTGCGGGTGTCCCAACTCCAGACCTTTGCCTCTCAGATCGGAAGAGCGGTTTCAG         |
| chr3 | 155588610 | 155588649 | GMPS_4437  | - | GTGACCTATGCACCAGACGTGCCGGAGCCGGCGGCTCAGCGCCAGATCAGGAGGGGAGATCGGAAGAGCGGTTTCAG            |
| chr3 | 155611257 | 155611296 | GMPS_4438  | - | GTGACCTATGCACCAGACGTCAATACAATAACAAGCTTAATTTATGAAAATTAAGCTAAGATCGGAAGAGCGGTTTCAG          |
| chr3 | 155615666 | 155615705 | GMPS_4439  | - | GTGACCTATGCACCAGACGTAGGAACAATCAGTGAAGAACTCTGTAAATTTTTATACAAGATCGGAAGAGCGGTTTCAG          |
| chr3 | 155621602 | 155621641 | GMPS_4440  | - | GTGACCTATGCACCAGACGTAAAAAATTAATGTTAATAGAAATCAAAAGAAAAATACCAGATCGGAAGAGCGGTTTCAG          |
| chr3 | 155623899 | 155623938 | GMPS_4441  | - | GTGACCTATGCACCAGACGTAAAAAATAAAACACAAAATATCTTAATTAATAACATGATAGATCGGAAGAGCGGTTTCAG         |
| chr3 | 155628431 | 155628470 | GMPS_4442  | - | GTGACCTATGCACCAGACGTAAAAATGACAAAATTTTATGCTGAAAAGACAGATCGGAAGAGCGGTTTCAG                  |
| chr3 | 155628853 | 155628892 | GMPS_4443  | - | GTGACCTATGCACCAGACGTAAATGAAAAATAAAATGAGCAAAACAAGCAAAAAAGAAAAAGATCGGAAGAGCGGTTTCAG        |
| chr3 | 155632158 | 155632197 | GMPS_4444  | - | GTGACCTATGCACCAGACGTGGGGAGAAGCGTTTTAAATTTGGTATAACATGTTTTTAAATAGATCGGAAGAGCGGTTTCAG       |
| chr3 | 155633758 | 155633797 | GMPS_4445  | - | GTGACCTATGCACCAGACGTCAAGGATAAAACAGCCTTGTAAAGATAAATTTTTTAAAGATCGGAAGAGCGGTTTCAG           |
| chr3 | 155636972 | 155637011 | GMPS_4446  | - | GTGACCTATGCACCAGACGTGAAAAGAAGCCAACCAATAAACTAGTAACCAAGATGACAAGATCGGAAGAGCGGTTTCAG         |
| chr3 | 155642980 | 155643019 | GMPS_4447  | - | GTGACCTATGCACCAGACGTCCAAAGAGGCACTTTTTTTCAGTTTTAAGAAATAAGGTATTGATCGGAAGAGCGGTTTCAG        |
| chr3 | 155649504 | 155649543 | GMPS_4448  | - | GTGACCTATGCACCAGACGTAAAGATAATCAATAATTTTTAATAGTCAAAAGATACACAAGATCGGAAGAGCGGTTTCAG         |
| chr3 | 155652655 | 155652694 | GMPS_4449  | - | GTGACCTATGCACCAGACGTAAAGGTAGAGGTAATAAATAACAGCAATTTCAATTTCAAAATGTAGAAGATCGGAAGAGCGGTTTCAG |
| chr3 | 155654077 | 155654116 | GMPS_4450  | - | GTGACCTATGCACCAGACGTGTATATGTAGAACAATCACACACCATAGAAAAGCACTCAGATCGGAAGAGCGGTTTCAG          |
| chr3 | 155655330 | 155655369 | GMPS_4451  | - | GTGACCTATGCACCAGACGTAAATATAGAAAAAGTCAAGATCCACTGCATGTCAGCAAGATCGGAAGAGCGGTTTCAG           |
| chrX | 132670102 | 132670141 | GPC3_4452  | - | GTGACCTATGCACCAGACGTCCCAGCACATGTGCTGCCCTACAGCACCTGTGGTCTTCCAGATCGGAAGAGCGGTTTCAG         |
| chrX | 132730418 | 132730457 | GPC3_4453  | - | GTGACCTATGCACCAGACGTAGTGTACCCAAATGTAATCAAAAATGGTGTGCTCAGAGATCGGAAGAGCGGTTTCAG            |
| chrX | 132826347 | 132826386 | GPC3_4454  | - | GTGACCTATGCACCAGACGTTTGAAGTTACATATAGCAATTTGAGGAATAATTGTCAAGATCGGAAGAGCGGTTTCAG           |
| chrX | 132833873 | 132833912 | GPC3_4455  | - | GTGACCTATGCACCAGACGTTCTTTTTTTTATTCCACAATAACAATTAACAATTGTATTAGATCGGAAGAGCGGTTTCAG         |
| chrX | 132887459 | 132887498 | GPC3_4456  | - | GTGACCTATGCACCAGACGTGTCTACAGTTGTACAGGATTTGGCCCTATTGGGGTGAAGATCGGAAGAGCGGTTTCAG           |
| chrX | 133087027 | 133087066 | GPC3_4457  | - | GTGACCTATGCACCAGACGTGGGATTATTTTAGATGTGCTGCTTAGTGGCATCATTATTAGATCGGAAGAGCGGTTTCAG         |
| chrX | 133119252 | 133119291 | GPC3_4458  | - | GTGACCTATGCACCAGACGTGCCCTTGAGCGTGCCTAGCGCCACCGGGAGCAAGGCGAGATCGGAAGAGCGGTTTCAG           |
| chrX | 132887806 | 132887845 | GPC3_4459  | - | GTGACCTATGCACCAGACGTTCTGAATTTGAATTTGAATGATCAACCAACTGATCAGATCGGAAGAGCGGTTTCAG             |
| chr2 | 239974743 | 239974782 | HDAC4_4460 | - | GTGACCTATGCACCAGACGTAAAGCTGCTGTTCTTTGCTGTCTGTCTGTCTGTTGAAGCAGATCGGAAGAGCGGTTTCAG         |
| chr2 | 239975106 | 239975145 | HDAC4_4461 | - | GTGACCTATGCACCAGACGTGCCCTGCCGCCCGCTGCAGGCTCACCCAGCCCCACTGTGAGATCGGAAGAGCGGTTTCAG         |
| chr2 | 239976395 | 239976434 | HDAC4_4462 | - | GTGACCTATGCACCAGACGTTGGCTGGGTGCTCACAGGGGACACGCCCTGGGGTGGGAAGATCGGAAGAGCGGTTTCAG          |
| chr2 | 239988368 | 239988407 | HDAC4_4463 | - | GTGACCTATGCACCAGACGTCCCAGAGACCCACAGGATGCTCCACTGACAGGCTCGGAGATCGGAAGAGCGGTTTCAG           |
| chr2 | 239990135 | 239990174 | HDAC4_4464 | - | GTGACCTATGCACCAGACGTTCCGATGACTGAGGAGCCGGTCTGCTCATGTCCATGAAGATCGGAAGAGCGGTTTCAG           |
| chr2 | 240002741 | 240002780 | HDAC4_4465 | - | GTGACCTATGCACCAGACGTTCCGCTTCCATGACACCTGAAGTAGCAGCTTTTCTCTGTAGATCGGAAGAGCGGTTTCAG         |
| chr2 | 240003748 | 240003787 | HDAC4_4466 | - | GTGACCTATGCACCAGACGTTATATAAGGGCTCTGGGGGAAAGGGGACTGCGGGAGAGATCGGAAGAGCGGTTTCAG            |

|       |            |           |             |   |                                                                                     |
|-------|------------|-----------|-------------|---|-------------------------------------------------------------------------------------|
| chr2  | 240005801  | 240005840 | HDAC4_4467  | - | GTGACCTATGCACCAGACGTCCGCCCTTGCCACGCGCAGCTCAGGTTGCTCCTTTGCCGTAGATCGGAAGAGCGGTTTCAG   |
| chr2  | 240009205  | 240009244 | HDAC4_4468  | - | GTGACCTATGCACCAGACGTGCCGACGCCCCGCACAGCAGGGGAACCCAGGTCTTCTTCAGATCGGAAGAGCGGTTTCAG    |
| chr2  | 240011655  | 240011694 | HDAC4_4469  | - | GTGACCTATGCACCAGACGTGCCTGGACAGTGGTGGCCCTCCAGGAGGCTGCCATAGATAGATCGGAAGAGCGGTTTCAG    |
| chr2  | 240016656  | 240016695 | HDAC4_4470  | - | GTGACCTATGCACCAGACGTCTTAATGTGTAATAATGTCCTGTTTTCTTCAGATCCCAGATCGGAAGAGCGGTTTCAG      |
| chr2  | 240024422  | 240024461 | HDAC4_4471  | - | GTGACCTATGCACCAGACGTACCTTCCCTTCCCTCCATATTTGGGTTTGAAGTCCCCTGAGAGATCGGAAGAGCGGTTTCAG  |
| chr2  | 240029696  | 240029735 | HDAC4_4472  | - | GTGACCTATGCACCAGACGTCCGGGGCAGGTGGGCAGCTGCGGCTTTGGGACCATTAGAAGATCGGAAGAGCGGTTTCAG    |
| chr2  | 2400332172 | 240033211 | HDAC4_4473  | - | GTGACCTATGCACCAGACGTGCGGTTGTGACGCTGAGGGTGAACGCGGGCCACAGTGGAGATCGGAAGAGCGGTTTCAG     |
| chr2  | 240036699  | 240036738 | HDAC4_4474  | - | GTGACCTATGCACCAGACGTGCGGGGAGGGCACCAGAAAGGCTGGCACGCACAGCCACCTAGATCGGAAGAGCGGTTTCAG   |
| chr2  | 240048102  | 240048141 | HDAC4_4475  | - | GTGACCTATGCACCAGACGTGGCTCAGCGCTCCCAGGCCCCAGGGCGGCTGTGTGCTGTAGATCGGAAGAGCGGTTTCAG    |
| chr2  | 240055891  | 240055930 | HDAC4_4476  | - | GTGACCTATGCACCAGACGTATGGGCTGGGTGCAGCCAGGCTCTGAGGCTGCCACCGCTAGATCGGAAGAGCGGTTTCAG    |
| chr2  | 240056173  | 240056212 | HDAC4_4477  | - | GTGACCTATGCACCAGACGTCCCCGTGGGTCCGTGTGGTGTGGGGTGGTGGTGTGGGTGATCGGAAGAGCGGTTTCAG      |
| chr2  | 240061330  | 240061369 | HDAC4_4478  | - | GTGACCTATGCACCAGACGTAGCGTTTTGTCCTGTGTCCTACGGCTAGATCGGACTCGGGAGATCGGAAGAGCGGTTTCAG   |
| chr2  | 240066229  | 240066268 | HDAC4_4479  | - | GTGACCTATGCACCAGACGTTAGAGCAGGTAGCCAGCCCGCCGCTGCCCTCTCTGCCAGGCCAGATCGGAAGAGCGGTTTCAG |
| chr2  | 240078298  | 240078337 | HDAC4_4480  | - | GTGACCTATGCACCAGACGTAGGCATGCTGTGGGCCGGGAGGTCTCCTGCACGGGCACCTAGATCGGAAGAGCGGTTTCAG   |
| chr2  | 240085449  | 240085488 | HDAC4_4481  | - | GTGACCTATGCACCAGACGTGTGTGGGGAGCACCCCGGCTCCTCTCTGGGGGCCAGAGAGATCGGAAGAGCGGTTTCAG     |
| chr2  | 240111479  | 240111518 | HDAC4_4482  | - | GTGACCTATGCACCAGACGTGTGCCGGGGCTGCGGGTGGGCCAGGCCCTCCGGCACCTCAAAGATCGGAAGAGCGGTTTCAG  |
| chr2  | 240158239  | 240158278 | HDAC4_4483  | - | GTGACCTATGCACCAGACGTCCACCCCTGCCCTGTCCGGCCGGCCCTGCCTGAGCCAAAAGATCGGAAGAGCGGTTTCAG    |
| chr2  | 240274323  | 240274362 | HDAC4_4484  | - | GTGACCTATGCACCAGACGTGCTAATTTCTCTGTGGCCACACAGCGGGGCTTTCTTTGGCAGATCGGAAGAGCGGTTTCAG   |
| chr6  | 34208508   | 34208547  | HMGA1_4485  | - | GTGACCTATGCACCAGACGTCTAAGGAGCAGGTGGAAGAGTGATGGCTGGGATGCTGGGAAGATCGGAAGAGCGGTTTCAG   |
| chr6  | 34210439   | 34210478  | HMGA1_4486  | - | GTGACCTATGCACCAGACGTAGAGGGGTAGTACAGGGACAGTCATCACCTGTTTCCACCCAGATCGGAAGAGCGGTTTCAG   |
| chr6  | 34211195   | 34211234  | HMGA1_4487  | - | GTGACCTATGCACCAGACGTAGAGAAAATATCTCCTAAGTCCAAAATGCTCATAGTGTAGATCGGAAGAGCGGTTTCAG     |
| chr6  | 34212558   | 34212597  | HMGA1_4488  | - | GTGACCTATGCACCAGACGTGGCAGTTGTTGGTGTGAGCTCTGGCCGGTCCCCTCTTCAGATCGGAAGAGCGGTTTCAG     |
| chr2  | 176972034  | 176972073 | HOXD11_4489 | - | GTGACCTATGCACCAGACGTGTGCGCGCCAGCGAGCCTGTGGCCCTCCCGCCGACCCAGATCGGAAGAGCGGTTTCAG      |
| chr2  | 176973585  | 176973624 | HOXD11_4490 | - | GTGACCTATGCACCAGACGTGTAAGCAGGTAGAGGGGTGAGAGCGCCGCTGCCTGACAGCCAGATCGGAAGAGCGGTTTCAG  |
| chr2  | 209101753  | 209101792 | IDH1_4491   | - | GTGACCTATGCACCAGACGTGAGCTAAGAAGGATAATTGTCTTTTGGTAAGTGTCTACAGATCGGAAGAGCGGTTTCAG     |
| chr2  | 209103745  | 209103784 | IDH1_4492   | - | GTGACCTATGCACCAGACGTGATGCCCTAGTTTCTATGGTCAAATTAACACTTATCCTCAAGATCGGAAGAGCGGTTTCAG   |
| chr2  | 209104537  | 209104576 | IDH1_4493   | - | GTGACCTATGCACCAGACGTGTTTACATTGATTTCTCACAGAGAGTGTCTCCTCAAAGCAAGATCGGAAGAGCGGTTTCAG   |
| chr2  | 209106668  | 209106707 | IDH1_4494   | - | GTGACCTATGCACCAGACGTGGAGCCTGGCCGTGTAGGAACAGGGTCAATCCAGGTAAGTGTAGATCGGAAGAGCGGTTTCAG |
| chr2  | 209108101  | 209108140 | IDH1_4495   | - | GTGACCTATGCACCAGACGTCTTTTTTAACTTTTTCTTATTCTCAAGTAAGTGTACAAGATCGGAAGAGCGGTTTCAG      |
| chr2  | 209109993  | 209110032 | IDH1_4496   | - | GTGACCTATGCACCAGACGTCTGTAGCAATAAGCTCTTTTTTTTTTAAACAAATGATTTAAGATCGGAAGAGCGGTTTCAG   |
| chr2  | 209113043  | 209113082 | IDH1_4497   | - | GTGACCTATGCACCAGACGTGGCAATAATGTGATTTTGCATGTTTTTTTTTTCATGGCAGATCGGAAGAGCGGTTTCAG     |
| chr15 | 99250741   | 99250780  | IGF1R_4498  | - | GTGACCTATGCACCAGACGTACAAGAGGGTAAAGTCTCAGTTAGAAGGAAATAATTTTAGATCGGAAGAGCGGTTTCAG     |
| chr15 | 99434504   | 99434543  | IGF1R_4499  | - | GTGACCTATGCACCAGACGTAGAGGAGAGACGGAGATGAGACCCGGGCAGGGGAGGCCACCGAGATCGGAAGAGCGGTTTCAG |
| chr15 | 99439936   | 99439975  | IGF1R_4500  | - | GTGACCTATGCACCAGACGTAGAAAAAAATCAAAACACACATAATTTAGTCTGTCTAGATCGGAAGAGCGGTTTCAG       |
| chr15 | 99442656   | 99442695  | IGF1R_4501  | - | GTGACCTATGCACCAGACGTGAGGGAATGTGCTACTGTGTCTCACTTGTGTAAGGTTGAGATCGGAAGAGCGGTTTCAG     |
| chr15 | 99451864   | 99451903  | IGF1R_4502  | - | GTGACCTATGCACCAGACGTAGAAATCGATGTTAGCGCACCTGCCCTTGGCCACAGTCCAGATCGGAAGAGCGGTTTCAG    |
| chr15 | 99454494   | 99454533  | IGF1R_4503  | - | GTGACCTATGCACCAGACGTGAGTACATCCGTGAGTGACAGAGATTCATGTGTCTCTGAAAGATCGGAAGAGCGGTTTCAG   |
| chr15 | 99456223   | 99456262  | IGF1R_4504  | - | GTGACCTATGCACCAGACGTATTAAGTTACAGAAAAGTTCGGGGCTCTGACATCAAAACAGATCGGAAGAGCGGTTTCAG    |
| chr15 | 99459143   | 99459182  | IGF1R_4505  | - | GTGACCTATGCACCAGACGTGAACAAAGAACATTCTAGAAAATGAAATGAACTTAAAGATAGATCGGAAGAGCGGTTTCAG   |
| chr15 | 99459851   | 99459890  | IGF1R_4506  | - | GTGACCTATGCACCAGACGTAGAAAAACCAAAACAAGTGGGAATGAAAGCCGTTATAAGATCGGAAGAGCGGTTTCAG      |
| chr15 | 99465327   | 99465366  | IGF1R_4507  | - | GTGACCTATGCACCAGACGTGAGAGAAATGGGCTTTTTTAAAGTACTTTTACCTCTTTTTCAGATCGGAAGAGCGGTTTCAG  |
| chr15 | 99467055   | 99467094  | IGF1R_4508  | - | GTGACCTATGCACCAGACGTAAACAGGTGACAAAGTTGGATTTGGGTTCCAGGGAGGGAGATCGGAAGAGCGGTTTCAG     |
| chr15 | 99467704   | 99467743  | IGF1R_4509  | - | GTGACCTATGCACCAGACGTAAAACATACATGTCAATTTCCCATGAATGCAGGAGAAATCAGATCGGAAGAGCGGTTTCAG   |
| chr15 | 99472737   | 99472776  | IGF1R_4510  | - | GTGACCTATGCACCAGACGTGAGGAGGAAATGATAAAATATCACCAAGGTGAACAATTTGCAGATCGGAAGAGCGGTTTCAG  |
| chr15 | 99473414   | 99473453  | IGF1R_4511  | - | GTGACCTATGCACCAGACGTGATTAATTTACGTTAAACAAAACCCACCTCCATACATTAGATCGGAAGAGCGGTTTCAG     |
| chr15 | 99478003   | 99478042  | IGF1R_4512  | - | GTGACCTATGCACCAGACGTAAACGTAATTAAGCAGGTACAGAAACCAAGCCCTTAGACAAGATCGGAAGAGCGGTTTCAG   |
| chr15 | 99478495   | 99478534  | IGF1R_4513  | - | GTGACCTATGCACCAGACGTTCAAAAAGAGAAAGACTCAGAGGGTCAGGTGCCCTTGTAGATCGGAAGAGCGGTTTCAG     |
| chr15 | 99482380   | 99482419  | IGF1R_4514  | - | GTGACCTATGCACCAGACGTAAAAAAATTCACATGAGAAATTTGGATTTTTTTTTTTCAGATCGGAAGAGCGGTTTCAG     |
| chr15 | 99486102   | 99486141  | IGF1R_4515  | - | GTGACCTATGCACCAGACGTAGAGAGGGCGCAGAGTCAACAGCTGGAGCAGGCACCACTGAGATCGGAAGAGCGGTTTCAG   |
| chr15 | 99491753   | 99491792  | IGF1R_4516  | - | GTGACCTATGCACCAGACGTAAAAAACTGTGAGGAGCTTGGAAAGGGATGGACTGAACAAGATCGGAAGAGCGGTTTCAG    |
| chr15 | 99500240   | 99500279  | IGF1R_4517  | - | GTGACCTATGCACCAGACGTGACACACGGGAGGGGCTCAAACCCGGCCACATGGAGATCGGAAGAGCGGTTTCAG         |
| chr15 | 99251014   | 99251053  | IGF1R_4518  | - | GTGACCTATGCACCAGACGTGATGACCAAGGCGTGTGTAAGAGTTCAGAGCCGGAGATCGGAAGAGCGGTTTCAG         |
| chr7  | 45954369   | 45954408  | IGFBP3_4519 | - | GTGACCTATGCACCAGACGTCAAGGGTGTACTCAGGAGGGGCAGCCTGGGGCTCCAGGAGATCGGAAGAGCGGTTTCAG     |
| chr7  | 45956097   | 45956136  | IGFBP3_4520 | - | GTGACCTATGCACCAGACGTTCCTCAGTGTGTTTTCTTCTCTTCTGTTGACACAGAGGAAGATCGGAAGAGCGGTTTCAG    |
| chr7  | 45956762   | 45956801  | IGFBP3_4521 | - | GTGACCTATGCACCAGACGTTCCTCTTGTAAAGGAGGAGGGCAAGACTGCCAAGCCTAGATCGGAAGAGCGGTTTCAG      |
| chr7  | 45960269   | 45960308  | IGFBP3_4522 | - | GTGACCTATGCACCAGACGTTCAGCACCCGGCGCACTGGCCGGAAGGGCTGGGGTTAGATCGGAAGAGCGGTTTCAG       |
| chr7  | 45960287   | 45960326  | IGFBP3_4523 | - | GTGACCTATGCACCAGACGTGCGCCAGTGCCTGCTGTCAGCACCCGCGCACTGGCGAGATCGGAAGAGCGGTTTCAG       |
| chr3  | 123813635  | 123813674 | KALRN_4524  | - | GTGACCTATGCACCAGACGTACTCATCTTACAGCCAGTCCCTCGGCAGAGCCTCATCAGATCGGAAGAGCGGTTTCAG      |

|      |           |           |            |   |                                                                                     |
|------|-----------|-----------|------------|---|-------------------------------------------------------------------------------------|
| chr3 | 123946787 | 123946826 | KALRN_4525 | - | GTGACCTATGCACCAGACGTACA AAC CAGAAGGAATCAGGGTGAGAGGAGCCAGCTGGCTAGATCGGAAGAGCGGTTCCAG |
| chr3 | 123953626 | 123953665 | KALRN_4526 | - | GTGACCTATGCACCAGACGTGAGGAAAGAGAGAGTGTTTAAGAAAACCACTCAGAAAGGAAGATCGGAAGAGCGGTTCCAG   |
| chr3 | 123983295 | 123983334 | KALRN_4527 | - | GTGACCTATGCACCAGACGTGTCAGAGGTCGGTATGGTCACTCTGGGTAGCTGAGACTTTAGATCGGAAGAGCGGTTCCAG   |
| chr3 | 123987540 | 123987579 | KALRN_4528 | - | GTGACCTATGCACCAGACGTGACAGACAGACAAGGATACTCAGTGATGTCAGGGGAAGAAAAGATCGGAAGAGCGGTTCCAG  |
| chr3 | 124017588 | 124017627 | KALRN_4529 | - | GTGACCTATGCACCAGACGTCAAGAAGGCACAGCATAATCAGAAATGGTCATGGTCTGAATAGATCGGAAGAGCGGTTCCAG  |
| chr3 | 124044777 | 124044816 | KALRN_4530 | - | GTGACCTATGCACCAGACGTAAAGGAGAGTGTCTAGTGGGGCAGGCTCAAAGACATCCACAGATCGGAAGAGCGGTTCCAG   |
| chr3 | 124048658 | 124048697 | KALRN_4531 | - | GTGACCTATGCACCAGACGTAGCAGGTTGGATGTGGGGGAGCACTGGGGGTGAGGAGAGATCGGAAGAGCGGTTCCAG      |
| chr3 | 124053062 | 124053101 | KALRN_4532 | - | GTGACCTATGCACCAGACGTGAGAGAAAGTTAAAGTTAAGGGAAAAGGGTGATAGGCAGGGAGATCGGAAGAGCGGTTCCAG  |
| chr3 | 124065940 | 124065979 | KALRN_4533 | - | GTGACCTATGCACCAGACGTAAAGATAACAGCAACAATGACTTTCTAGCAGAAGGAAAGAGATCGGAAGAGCGGTTCCAG    |
| chr3 | 124103642 | 124103681 | KALRN_4534 | - | GTGACCTATGCACCAGACGTCAACAGTGAGGGCAAAGTCAAGTTGACAGTCGCGCCTTCCAGAGATCGGAAGAGCGGTTCCAG |
| chr3 | 124113932 | 124113971 | KALRN_4535 | - | GTGACCTATGCACCAGACGTAGAGCAGAGATTCACCTCAGGGAAGATGGGAGAGGCCAGGAGATCGGAAGAGCGGTTCCAG   |
| chr3 | 124117494 | 124117533 | KALRN_4536 | - | GTGACCTATGCACCAGACGTGTTGGGGAGAAAAAGGGAGGGAGAGGCCTTTCCATGTTAAAGATCGGAAGAGCGGTTCCAG   |
| chr3 | 124132267 | 124132306 | KALRN_4537 | - | GTGACCTATGCACCAGACGTACCACCTGCATCAGCACAGGCTCACCAGGTCCACGAGAGAAAGATCGGAAGAGCGGTTCCAG  |
| chr3 | 124141609 | 124141648 | KALRN_4538 | - | GTGACCTATGCACCAGACGTAAAAATGAAACAATAAAAACCAGCTAGTACTGTGAAGGAGATCGGAAGAGCGGTTCCAG     |
| chr3 | 124149453 | 124149492 | KALRN_4539 | - | GTGACCTATGCACCAGACGTGGGACAGCACACAGGTGAATGGCCTTCCGCAGTTTCCCAGATCGGAAGAGCGGTTCCAG     |
| chr3 | 124153104 | 124153143 | KALRN_4540 | - | GTGACCTATGCACCAGACGTGGAGAGGAGAGAAAGTCCGTGGGAACAACCCAGCGCTGGAGATCGGAAGAGCGGTTCCAG    |
| chr3 | 124157685 | 124157724 | KALRN_4541 | - | GTGACCTATGCACCAGACGTGAGAAAGAAAGACTCAGTAAATTAATTATTTCAGGAATTAAGATCGGAAGAGCGGTTCCAG   |
| chr3 | 124160742 | 124160781 | KALRN_4542 | - | GTGACCTATGCACCAGACGTCAAAGCTGTGAGGCCCTGTCGCCAGGTGTATGGAATCAGATCGGAAGAGCGGTTCCAG      |
| chr3 | 124164958 | 124164997 | KALRN_4543 | - | GTGACCTATGCACCAGACGTAGGAGATGCATGATGGTCAACAAGGGGCTCTGAGCAATCCAGATCGGAAGAGCGGTTCCAG   |
| chr3 | 124165560 | 124165599 | KALRN_4544 | - | GTGACCTATGCACCAGACGTAAACAACCTCATCCAGTCCCCAAAAGGCAGCTGTCAGTAGAGATCGGAAGAGCGGTTCCAG   |
| chr3 | 124173974 | 124174013 | KALRN_4545 | - | GTGACCTATGCACCAGACGTAGATGGCCTTAAGTTACTGGATTACATTTATTCTCCTGCCAGATCGGAAGAGCGGTTCCAG   |
| chr3 | 124175407 | 124175446 | KALRN_4546 | - | GTGACCTATGCACCAGACGTAGGGATCACAAGGTCACCTTGTGATGCTTTGGGAAAGCAAGATCGGAAGAGCGGTTCCAG    |
| chr3 | 124180687 | 124180726 | KALRN_4547 | - | GTGACCTATGCACCAGACGTACAATGGGCTTTTACTTTGGATATAGATAATGTCTCTCAGATCGGAAGAGCGGTTCCAG     |
| chr3 | 124181321 | 124181360 | KALRN_4548 | - | GTGACCTATGCACCAGACGTGTAACAGTTTCACTGGCACTGGCAGGCCATATAAAAGATCGGAAGAGCGGTTCCAG        |
| chr3 | 124193460 | 124193499 | KALRN_4549 | - | GTGACCTATGCACCAGACGTAGAAAAAGACTGAATCAGACACCTCTGTGCAGCTGACCCAGATCGGAAGAGCGGTTCCAG    |
| chr3 | 124196042 | 124196081 | KALRN_4550 | - | GTGACCTATGCACCAGACGTCAAAGATAATAAGATAAGCATTATTAGTTGTTCCCTTAGATCGGAAGAGCGGTTCCAG      |
| chr3 | 124201605 | 124201644 | KALRN_4551 | - | GTGACCTATGCACCAGACGTGAGAAACAATGTGCAATTAGACACAGAGGGGTGTGTGCATGAGATCGGAAGAGCGGTTCCAG  |
| chr3 | 124207001 | 124207040 | KALRN_4552 | - | GTGACCTATGCACCAGACGTAAAGTCCCGACATAATTAGGGCCATCTCCCCAGCTTCCAGATCGGAAGAGCGGTTCCAG     |
| chr3 | 124209491 | 124209530 | KALRN_4553 | - | GTGACCTATGCACCAGACGTCCATTTCCACCTGTGGAGTTTCTACTGCCACGTCAAGATCGGAAGAGCGGTTCCAG        |
| chr3 | 124210120 | 124210159 | KALRN_4554 | - | GTGACCTATGCACCAGACGTGAAATGCCTATGACAGGGCGGGAAGGGAGGGCAGTGGGGAGATCGGAAGAGCGGTTCCAG    |
| chr3 | 124211537 | 124211576 | KALRN_4555 | - | GTGACCTATGCACCAGACGTACAGGGAGAAAAGACTGAGAACCCCAACTCCCATCACCTTAAGATCGGAAGAGCGGTTCCAG  |
| chr3 | 124215108 | 124215147 | KALRN_4556 | - | GTGACCTATGCACCAGACGTAAAGAGAAAAAACAGGGGTGGGGGTGGGGGAACCACTGAGATCGGAAGAGCGGTTCCAG     |
| chr3 | 124237197 | 124237236 | KALRN_4557 | - | GTGACCTATGCACCAGACGTAAAGGGCCGGGCTCTGTGATTTGCATATAACTTTGCAAAAAGATCGGAAGAGCGGTTCCAG   |
| chr3 | 124303619 | 124303658 | KALRN_4558 | - | GTGACCTATGCACCAGACGTGCCCCAGCGCTCCCGCATGCCACAGCGGGGCCAGCCGGGAGATCGGAAGAGCGGTTCCAG    |
| chr3 | 124351217 | 124351256 | KALRN_4559 | - | GTGACCTATGCACCAGACGTGCGGACAGACAGCCATGTACAGAGTGGTGAAGGCAGCCAGATCGGAAGAGCGGTTCCAG     |
| chr3 | 124352646 | 124352685 | KALRN_4560 | - | GTGACCTATGCACCAGACGTAGAGCAGCATTAGTTACTGTGTACAAACATGCCAGTGGTAGATCGGAAGAGCGGTTCCAG    |
| chr3 | 124356005 | 124356044 | KALRN_4561 | - | GTGACCTATGCACCAGACGTTCCGGCAGCAGAGGAAAAGCAGATTAGCAAAGAATAAGGAAGATCGGAAGAGCGGTTCCAG   |
| chr3 | 124369605 | 124369644 | KALRN_4562 | - | GTGACCTATGCACCAGACGTAGAAAAACAGGCTTAGAGAAAGTGTACTTTGAAAAGTCAATTAGATCGGAAGAGCGGTTCCAG |
| chr3 | 124374398 | 124374437 | KALRN_4563 | - | GTGACCTATGCACCAGACGTGATTAAGAACAGTGAGTGTTCCTTTCATTGTTAAGCCAAAGATCGGAAGAGCGGTTCCAG    |
| chr3 | 124376245 | 124376284 | KALRN_4564 | - | GTGACCTATGCACCAGACGTAAAGGCAATGGTTAGTAGCATATTTACAGGAAAAGCTTTAGATCGGAAGAGCGGTTCCAG    |
| chr3 | 124376531 | 124376570 | KALRN_4565 | - | GTGACCTATGCACCAGACGTAAAAGGGGATAGAGAAGGAAGCAACTTATTCAGAAGTGTAGATCGGAAGAGCGGTTCCAG    |
| chr3 | 124377228 | 124377267 | KALRN_4566 | - | GTGACCTATGCACCAGACGTAGAGAGAGACATGTGGACAGTCAGGCATCTTGTGTCTTTTAGATCGGAAGAGCGGTTCCAG   |
| chr3 | 124378162 | 124378201 | KALRN_4567 | - | GTGACCTATGCACCAGACGTGGCAGCAATATTAGAAGAAAAGGAAGTGAAGAACTGGGGAGATCGGAAGAGCGGTTCCAG    |
| chr3 | 124379720 | 124379759 | KALRN_4568 | - | GTGACCTATGCACCAGACGTGGGGAAAGCAGGCAAGAGTGTGGGAAGGGGTAATAATTAGTAAGATCGGAAGAGCGGTTCCAG |
| chr3 | 124380648 | 124380687 | KALRN_4569 | - | GTGACCTATGCACCAGACGTGAACAACCTGTTACTCAGGAGGGGGAACAGCACTCAGGCAGAGATCGGAAGAGCGGTTCCAG  |
| chr3 | 124385246 | 124385285 | KALRN_4570 | - | GTGACCTATGCACCAGACGTGACCGCTGGGGTGAAGTGAATGAAAATGGGGAGCGAGCATCGGAAGAGCGGTTCCAG       |
| chr3 | 124385809 | 124385848 | KALRN_4571 | - | GTGACCTATGCACCAGACGTACGAGTTGATCCTTTTTACATTTAAAAGATTTTTTAAAAAAGATCGGAAGAGCGGTTCCAG   |
| chr3 | 124390457 | 124390496 | KALRN_4572 | - | GTGACCTATGCACCAGACGTAGAGCAGGTGGTTACTCTAAGCTTTGGGAATCCACAAGGAGATCGGAAGAGCGGTTCCAG    |
| chr3 | 124393158 | 124393197 | KALRN_4573 | - | GTGACCTATGCACCAGACGTAGGGTGAGAGGGGCACAACAAGGAGCGCTAGTTCACATAGATCGGAAGAGCGGTTCCAG     |
| chr3 | 124396987 | 124397026 | KALRN_4574 | - | GTGACCTATGCACCAGACGTAAAAATGCACCAATCAAAATGGCAGGTCAGGGACAGCGAAGATCGGAAGAGCGGTTCCAG    |
| chr3 | 124398255 | 124398294 | KALRN_4575 | - | GTGACCTATGCACCAGACGTAGCATGAGGAAGGGGAAGAAAAGCAACACAGTTAGAACAAGATCGGAAGAGCGGTTCCAG    |
| chr3 | 124412601 | 124412640 | KALRN_4576 | - | GTGACCTATGCACCAGACGTAAAAGAGACAGAAAATGCTTGAAGTAACTTAACCTAAAAGATCGGAAGAGCGGTTCCAG     |
| chr3 | 124413129 | 124413168 | KALRN_4577 | - | GTGACCTATGCACCAGACGTATCAACATACATTAACATCATTAGAGCAAATTTAGAATAAGATCGGAAGAGCGGTTCCAG    |
| chr3 | 124414931 | 124414970 | KALRN_4578 | - | GTGACCTATGCACCAGACGTCAAAGGATGCTCTTCAGACTCCAGTAATGAGACACTTGAAGATCGGAAGAGCGGTTCCAG    |
| chr3 | 124416390 | 124416429 | KALRN_4579 | - | GTGACCTATGCACCAGACGTAGAAATCAGGATCAGGTGCTATTTCTGCAGAACTTGCATAGATCGGAAGAGCGGTTCCAG    |
| chr3 | 124418666 | 124418705 | KALRN_4580 | - | GTGACCTATGCACCAGACGTGTTTCCCAGGAGGGGAAAAGAGAAAAGCCAAAGGGATATTAGATCGGAAGAGCGGTTCCAG   |
| chr3 | 124420835 | 124420874 | KALRN_4581 | - | GTGACCTATGCACCAGACGTAAAAGAAATCCATTTACAATCAGAGGATGTCATATAAGAAGATCGGAAGAGCGGTTCCAG    |
| chr3 | 124431732 | 124431771 | KALRN_4582 | - | GTGACCTATGCACCAGACGTAAAGAGGGAGAGTTTGCCAACATTCATTAATTAAC TAGATAAGATCGGAAGAGCGGTTCCAG |

|       |           |           |            |   |                                                                                       |
|-------|-----------|-----------|------------|---|---------------------------------------------------------------------------------------|
| chr3  | 124436044 | 124436083 | KALRN_4583 | - | GTGACCTATGCACCAGACGTGCAGGGAAAGGCAAAGGAAATATGTTTGAATGAAGAAATAGATCGGAAGAGCGGTTTCAG      |
| chr3  | 124437722 | 124437761 | KALRN_4584 | - | GTGACCTATGCACCAGACGTCCAAGGAAGCAGGGAGAAAAGAGGGAAAGTTTGTAGCCCTCAGATCGGAAGAGCGGTTTCAG    |
| chr3  | 123987796 | 123987835 | KALRN_4585 | - | GTGACCTATGCACCAGACGTCTGTGTGTTCGTCATGAGCCGCCGAGAGCCCTCCACAAGATCGGAAGAGCGGTTTCAG        |
| chr3  | 124437995 | 124438034 | KALRN_4586 | - | GTGACCTATGCACCAGACGTGATACGTTGATACATGTCTCCTCTTTGCTCTCATCCAAGAAGATCGGAAGAGCGGTTTCAG     |
| chr3  | 20081920  | 20081959  | KAT2B_4587 | - | GTGACCTATGCACCAGACGTAGCACGGCAGGAGCGGCCGAGTGTGACGGCCGCCGCCGCGCAGATCGGAAGAGCGGTTTCAG    |
| chr3  | 20113775  | 20113814  | KAT2B_4588 | - | GTGACCTATGCACCAGACGTAATAAAGAAAGAGACAAAATATTTAACAGGCAGCCGTTGGAGATCGGAAGAGCGGTTTCAG     |
| chr3  | 20136705  | 20136744  | KAT2B_4589 | - | GTGACCTATGCACCAGACGTGATCAAAGAAACATATGTAAGACCTCAATTGGAAACCAAAGATCGGAAGAGCGGTTTCAG      |
| chr3  | 20142729  | 20142768  | KAT2B_4590 | - | GTGACCTATGCACCAGACGTGGGAAGGCAATTTCTTCATGCAGCTATGCAATCATACTAAAGATCGGAAGAGCGGTTTCAG     |
| chr3  | 20153038  | 20153077  | KAT2B_4591 | - | GTGACCTATGCACCAGACGTAGAAGTCAAGCACCATCAATATCCATAAACCCCCAGGTCAGATCGGAAGAGCGGTTTCAG      |
| chr3  | 20156324  | 20156363  | KAT2B_4592 | - | GTGACCTATGCACCAGACGTGAGTAATAGCAATAAGATTAATAAAAAAACTACTGTAAGGAAGATCGGAAGAGCGGTTTCAG    |
| chr3  | 20161040  | 20161079  | KAT2B_4593 | - | GTGACCTATGCACCAGACGTAAAAAGGAGAAGAAGGTGTAGATGACTGACTCCTTTCTTAAGATCGGAAGAGCGGTTTCAG     |
| chr3  | 20164110  | 20164149  | KAT2B_4594 | - | GTGACCTATGCACCAGACGTCAAAATAAAAGGCAACAATGGGTGGTTCTAAACACAAAAGATCGGAAGAGCGGTTTCAG       |
| chr3  | 20167347  | 20167386  | KAT2B_4595 | - | GTGACCTATGCACCAGACGTGAGACAGGAAAAATACACAGAGCTATTCTCTCAAGACAGATCGGAAGAGCGGTTTCAG        |
| chr3  | 20168865  | 20168904  | KAT2B_4596 | - | GTGACCTATGCACCAGACGTAAGATTATGTCAAAGTTTTACCTATCCTAGTTATATAAATAGATCGGAAGAGCGGTTTCAG     |
| chr3  | 20178384  | 20178423  | KAT2B_4597 | - | GTGACCTATGCACCAGACGTGTTAGTATACAAACAATACATTAGACTGGGGAGAAAATAGATCGGAAGAGCGGTTTCAG       |
| chr3  | 20187758  | 20187797  | KAT2B_4598 | - | GTGACCTATGCACCAGACGTGAGGAAGGAAATGTGTTTAGGGAAGAAGTCTATGGATACAGATCGGAAGAGCGGTTTCAG      |
| chr3  | 20189405  | 20189444  | KAT2B_4599 | - | GTGACCTATGCACCAGACGTACAAGGTAAACACTGAATGAGAAGTCTTTGGTCAAGAAGATCGGAAGAGCGGTTTCAG        |
| chr3  | 20189685  | 20189724  | KAT2B_4600 | - | GTGACCTATGCACCAGACGTAAAAAGGAAACAGGAAAGCAATGATTAGAGTTTTACCCATAGATCGGAAGAGCGGTTTCAG     |
| chr3  | 20189845  | 20189884  | KAT2B_4601 | - | GTGACCTATGCACCAGACGTGAAAAAGTAAGGTATCTAATATGAAATTCATGTGGGAAGATCGGAAGAGCGGTTTCAG        |
| chr3  | 20193774  | 20193813  | KAT2B_4602 | - | GTGACCTATGCACCAGACGTAAAAAAATATTAGCAATCTTTGACTCCCTTTAAACACCAAGATCGGAAGAGCGGTTTCAG      |
| chr18 | 6942028   | 6942067   | LAMA1_4603 | - | GTGACCTATGCACCAGACGTGAATCCTCAGTTGGAATCATTGCTAATATTTGAGGAGAAAGATCGGAAGAGCGGTTTCAG      |
| chr18 | 6943129   | 6943168   | LAMA1_4604 | - | GTGACCTATGCACCAGACGTGTACCTGCTCTTCCACTCAAAGCGGCAGCTGTCCCTGGAGAGATCGGAAGAGCGGTTTCAG     |
| chr18 | 6947112   | 6947151   | LAMA1_4605 | - | GTGACCTATGCACCAGACGTCTCTCCTCAGTTGAGGCTCTTCTCCCGCCAGTGTGAGAGACAAGATCGGAAGAGCGGTTTCAG   |
| chr18 | 6948352   | 6948391   | LAMA1_4606 | - | GTGACCTATGCACCAGACGTGCAACACTCTGAAAGCCAGGCACTCCCCAGATGAGTCTGTACTCAGATCGGAAGAGCGGTTTCAG |
| chr18 | 6949050   | 6949089   | LAMA1_4607 | - | GTGACCTATGCACCAGACGTTTTTCCATACTGACATTTTACCTTCGTTGTGTTGTTAGATCGGAAGAGCGGTTTCAG         |
| chr18 | 6950731   | 6950770   | LAMA1_4608 | - | GTGACCTATGCACCAGACGTAGGAGGCTTGTGGTGGCTGCTTCTGAGTTCTGTTCCATCTAGATCGGAAGAGCGGTTTCAG     |
| chr18 | 6955302   | 6955341   | LAMA1_4609 | - | GTGACCTATGCACCAGACGTTTCTAACATCCTTATGCGGCGTCTCATTGCTAGATGTATGAGATCGGAAGAGCGGTTTCAG     |
| chr18 | 6956585   | 6956624   | LAMA1_4610 | - | GTGACCTATGCACCAGACGTCTCCTTTACTATCAGTCCAGTCCAGTCAGCAAAGGAGGGAGATCGGAAGAGCGGTTTCAG      |
| chr18 | 6958426   | 6958465   | LAMA1_4611 | - | GTGACCTATGCACCAGACGTCTGCTCTGCTGATTTCTGCATTTCTGACCTTTTCATGAGATCGGAAGAGCGGTTTCAG        |
| chr18 | 6959290   | 6959329   | LAMA1_4612 | - | GTGACCTATGCACCAGACGTGCGGCCAGGCAGTGTGTAATGAAGTTGTGGTGAAGTCAAGATCGGAAGAGCGGTTTCAG       |
| chr18 | 6961535   | 6961574   | LAMA1_4613 | - | GTGACCTATGCACCAGACGTCCAGTGCTCCTGAGCCCCAAGCTCAGGAAATTAATTCGGGAGATCGGAAGAGCGGTTTCAG     |
| chr18 | 6961894   | 6961933   | LAMA1_4614 | - | GTGACCTATGCACCAGACGTTTGTATTAAATGTTCAAATGAGTTCCATAAGTGTCCATTAGATCGGAAGAGCGGTTTCAG      |
| chr18 | 6965237   | 6965276   | LAMA1_4615 | - | GTGACCTATGCACCAGACGTAGATGGACTCACCAGATGTCGGTCCACCTCATAAGAATAGATCGGAAGAGCGGTTTCAG       |
| chr18 | 6966096   | 6966135   | LAMA1_4616 | - | GTGACCTATGCACCAGACGTTTGTGCGGCCCTGACCCCTACTGTATCACACATTTAGATAGATCGGAAGAGCGGTTTCAG      |
| chr18 | 6971806   | 6971845   | LAMA1_4617 | - | GTGACCTATGCACCAGACGTGTCACGGTTTAGCACATGTATGTTATTCTGTTAACATCTAGATCGGAAGAGCGGTTTCAG      |
| chr18 | 6973006   | 6973045   | LAMA1_4618 | - | GTGACCTATGCACCAGACGTGAAAGTCTTCTGAACAGGACTGATTGACTGATTTTACCTAGATCGGAAGAGCGGTTTCAG      |
| chr18 | 6974852   | 6974891   | LAMA1_4619 | - | GTGACCTATGCACCAGACGTATGTTCTCTCAAAGCAGCTCTCTTTTTAAAGTGTGTCTCAGATCGGAAGAGCGGTTTCAG      |
| chr18 | 6975886   | 6975925   | LAMA1_4620 | - | GTGACCTATGCACCAGACGTGACCTTTGGAAAGCGACACTGAATCTTTTATGCATTTCTAAGATCGGAAGAGCGGTTTCAG     |
| chr18 | 6977676   | 6977715   | LAMA1_4621 | - | GTGACCTATGCACCAGACGTGGCCCCGTGGCTTTCTGTAAGTGGGCTCTCAGTCTGTTGGGAGATCGGAAGAGCGGTTTCAG    |
| chr18 | 6978145   | 6978184   | LAMA1_4622 | - | GTGACCTATGCACCAGACGTGCCCTTCTCCAGTCTGCTGCTGCTGCTGATGCAGACGAGATCGGAAGAGCGGTTTCAG        |
| chr18 | 6980470   | 6980509   | LAMA1_4623 | - | GTGACCTATGCACCAGACGTAGGACTTTCTTCTGTAATAACGTTCTTCTCATTGTAAGAAGATCGGAAGAGCGGTTTCAG      |
| chr18 | 6982446   | 6982485   | LAMA1_4624 | - | GTGACCTATGCACCAGACGTGGCTCGGACGGTGTAGACAGGCAGAGTGAAGCGTGAAGCGTCAAGATCGGAAGAGCGGTTTCAG  |
| chr18 | 6983048   | 6983087   | LAMA1_4625 | - | GTGACCTATGCACCAGACGTACGTTGGCTTCTTTTTCTGGGCTCTGTGGGAGATTTTTCTGAGATCGGAAGAGCGGTTTCAG    |
| chr18 | 6985186   | 6985225   | LAMA1_4626 | - | GTGACCTATGCACCAGACGTGCCCTTTGTGGGAACCTAAGAGCTTGCAGTCTATTGATCGGAGATCGGAAGAGCGGTTTCAG    |
| chr18 | 6985476   | 6985515   | LAMA1_4627 | - | GTGACCTATGCACCAGACGTTCTGACACAGCCACAGTACAGTTTTTAAAGAATCTTACAGATCGGAAGAGCGGTTTCAG       |
| chr18 | 6986086   | 6986125   | LAMA1_4628 | - | GTGACCTATGCACCAGACGTCTTGCTCTCCTCTCTCAATAGAACAGGTAACAAAATACAGATCGGAAGAGCGGTTTCAG       |
| chr18 | 6992510   | 6992549   | LAMA1_4629 | - | GTGACCTATGCACCAGACGTAATTACTGTGTGCAATGCAACCAAGTAGAGAGAGAAAATCTAGATCGGAAGAGCGGTTTCAG    |
| chr18 | 6993590   | 6993629   | LAMA1_4630 | - | GTGACCTATGCACCAGACGTGCTGCTAGTTTGAAGTATCTGTGCTTATCTAGTAAGAAAGATCGGAAGAGCGGTTTCAG       |
| chr18 | 6995306   | 6995345   | LAMA1_4631 | - | GTGACCTATGCACCAGACGTTCCATAACCAACCAACCTTCTCCTGGTCCCTCCCATCAGAGATCGGAAGAGCGGTTTCAG      |
| chr18 | 6997691   | 6997730   | LAMA1_4632 | - | GTGACCTATGCACCAGACGTGAAATACAGAGATGAACAGACACTTGTATCATTAAAGGATAGATCGGAAGAGCGGTTTCAG     |
| chr18 | 6999394   | 6999433   | LAMA1_4633 | - | GTGACCTATGCACCAGACGTCTCCTCTAAATGTGTAAGATGTTTTTCTCCCAAATGTAGATCGGAAGAGCGGTTTCAG        |
| chr18 | 6999860   | 6999899   | LAMA1_4634 | - | GTGACCTATGCACCAGACGTGATGTTGTCTGATGTGAAATCCCTGGGCACTCTGTTTTTGTAGATCGGAAGAGCGGTTTCAG    |
| chr18 | 7002213   | 7002252   | LAMA1_4635 | - | GTGACCTATGCACCAGACGTACAGGGCAGCTGGCATGCTGGGCTGCCAGGGCTGCTTCAGATCGGAAGAGCGGTTTCAG       |
| chr18 | 7007088   | 7007127   | LAMA1_4636 | - | GTGACCTATGCACCAGACGTTTGTGGGGTCTTGGCTGAGTTTGAAGTAAAGTGGACGAGATCGGAAGAGCGGTTTCAG        |
| chr18 | 7008437   | 7008476   | LAMA1_4637 | - | GTGACCTATGCACCAGACGTTCTAGTCCAAATCTATTTCTGGGTTTGTAGTTGAAATGTGAGATCGGAAGAGCGGTTTCAG     |
| chr18 | 7009188   | 7009227   | LAMA1_4638 | - | GTGACCTATGCACCAGACGTCTTAGAATTTGACCGTTATTTTATATTTGAAAGCAAAGATCGGAAGAGCGGTTTCAG         |
| chr18 | 7010149   | 7010188   | LAMA1_4639 | - | GTGACCTATGCACCAGACGTGATCTTTTCATAGATCCCTTAAAGACATTGACTTTTGTAGATCGGAAGAGCGGTTTCAG       |
| chr18 | 7011249   | 7011288   | LAMA1_4640 | - | GTGACCTATGCACCAGACGTGCGCCCTCCGAGGCCAGTCCGTTGCTTCTTAGGATATACAAGATCGGAAGAGCGGTTTCAG     |



|       |           |           |            |   |                                                                                     |
|-------|-----------|-----------|------------|---|-------------------------------------------------------------------------------------|
| chr18 | 7011944   | 7011983   | LAMA1_4641 | - | GTGACCTATGCACCAGACGTACACAGCGAAAGTGTCTGCTTCTAACCCCACTCCCCTGGGAGATCGGAAGAGCGGTTTCAG   |
| chr18 | 7013764   | 7013803   | LAMA1_4642 | - | GTGACCTATGCACCAGACGTTCCATCCTCTCTTTCATCCTGTCTCTGGCTCCTCATCATAGATCGGAAGAGCGGTTTCAG    |
| chr18 | 7015671   | 7015710   | LAMA1_4643 | - | GTGACCTATGCACCAGACGTTCCATCCACGCTCTTGCTTAACTGAGAGTTGCTTTGCTGTAAGATCGGAAGAGCGGTTTCAG  |
| chr18 | 7016440   | 7016479   | LAMA1_4644 | - | GTGACCTATGCACCAGACGTATTTCCCTGTTTGTAGACTTTGTAGTCATTCCCAGAGCTTTAGATCGGAAGAGCGGTTTCAG  |
| chr18 | 7017227   | 7017266   | LAMA1_4645 | - | GTGACCTATGCACCAGACGTTGTGACTAATTGACACCTTAGCCTTGGTACAGAGGCGATTAGATCGGAAGAGCGGTTTCAG   |
| chr18 | 7023113   | 7023152   | LAMA1_4646 | - | GTGACCTATGCACCAGACGTGACCGTGAAGTCAGGTCAGCTGTTTATTGCCATAGGAAGTAGATCGGAAGAGCGGTTTCAG   |
| chr18 | 7024329   | 7024368   | LAMA1_4647 | - | GTGACCTATGCACCAGACGTTCCACTGGCTTCAACACATTTTTCGAAATTAATAATAATAGATCGGAAGAGCGGTTTCAG    |
| chr18 | 7025928   | 7025967   | LAMA1_4648 | - | GTGACCTATGCACCAGACGTGACCTCATCAGCGGTTCTGCCAGCATGGCCAGGATTCCCAGATCGGAAGAGCGGTTTCAG    |
| chr18 | 7032015   | 7032054   | LAMA1_4649 | - | GTGACCTATGCACCAGACGTCACTGTAGTTCAGGTGCCCTCTCCTCAATTCCAGAGCCAGATCGGAAGAGCGGTTTCAG     |
| chr18 | 7032933   | 7032972   | LAMA1_4650 | - | GTGACCTATGCACCAGACGTTCTCTTCTGTCTTTTTCCCTTCCTTCCGTTCCCTTAAGGGGAAGATCGGAAGAGCGGTTTCAG |
| chr18 | 7034428   | 7034467   | LAMA1_4651 | - | GTGACCTATGCACCAGACGTAAAAATGGAGGAAAAAATTACGGTGAAGGTACTTCCATTTTAGATCGGAAGAGCGGTTTCAG  |
| chr18 | 7035936   | 7035975   | LAMA1_4652 | - | GTGACCTATGCACCAGACGTTTGCTTTGATTCTGCTATAGACTTAGGGCTTAGTGGCTAGATCGGAAGAGCGGTTTCAG     |
| chr18 | 7037527   | 7037566   | LAMA1_4653 | - | GTGACCTATGCACCAGACGTCCGTAGCGATGTCTCAGATGAAGATCTCAGGGAAGATCGGAAGAGCGGTTTCAG          |
| chr18 | 7038759   | 7038798   | LAMA1_4654 | - | GTGACCTATGCACCAGACGTCCATCTGCGCGCGGGATTAAATGAGCAGGTCGTATTGCAAGATCGGAAGAGCGGTTTCAG    |
| chr18 | 7040025   | 7040064   | LAMA1_4655 | - | GTGACCTATGCACCAGACGTAGGTGAGAGACACCCCTGAGCTTCCCTTGGAGCTTCTCTGGAGATCGGAAGAGCGGTTTCAG  |
| chr18 | 7042094   | 7042133   | LAMA1_4656 | - | GTGACCTATGCACCAGACGTGATTCACTTTTGTGCTTGAATTGATTTGTGTGTGTGAGATCGGAAGAGCGGTTTCAG       |
| chr18 | 7043176   | 7043215   | LAMA1_4657 | - | GTGACCTATGCACCAGACGTTTTCTTTGCCATTGCTGATCTTCATCATCTCCCCAGGTGGAGATCGGAAGAGCGGTTTCAG   |
| chr18 | 7044671   | 7044710   | LAMA1_4658 | - | GTGACCTATGCACCAGACGTTTAGAATCTGAAAGTCAGTACGTTTTCTCTTAATACGTAGATCGGAAGAGCGGTTTCAG     |
| chr18 | 7046227   | 7046266   | LAMA1_4659 | - | GTGACCTATGCACCAGACGTGATTTTACATTTTTACTAAAACCTTCAAAAACGAAATTTGAAGATCGGAAGAGCGGTTTCAG  |
| chr18 | 7049027   | 7049066   | LAMA1_4660 | - | GTGACCTATGCACCAGACGTGACGGCAGTCTGCCAAATAAAAATAAAAAGATTTCATTTAAGATCGGAAGAGCGGTTTCAG   |
| chr18 | 7050643   | 7050682   | LAMA1_4661 | - | GTGACCTATGCACCAGACGTTGCCCGCTGCAGCAAGATCTGTTTCTCATCAGAGTCTCCAGATCGGAAGAGCGGTTTCAG    |
| chr18 | 7079924   | 7079963   | LAMA1_4662 | - | GTGACCTATGCACCAGACGTCCAGAACCATTGAAGAGTGTCTACAGGCTGCTGAGCTGTGAGATCGGAAGAGCGGTTTCAG   |
| chr18 | 7080236   | 7080275   | LAMA1_4663 | - | GTGACCTATGCACCAGACGTGCGCTTTATTTCTGAAATCCCATTGGGAATGTACACTTTGAGATCGGAAGAGCGGTTTCAG   |
| chr13 | 113960750 | 113960789 | LAMP1_4664 | - | GTGACCTATGCACCAGACGTCCGTGAGGCAAGCAGGACCATCAAAAACCTGTCAGAAAATACAGATCGGAAGAGCGGTTTCAG |
| chr13 | 113963908 | 113963947 | LAMP1_4665 | - | GTGACCTATGCACCAGACGTACACAATTAATGTAACCCAATTGGGATGCAGGTTATTAAGATCGGAAGAGCGGTTTCAG     |
| chr13 | 113964974 | 113965013 | LAMP1_4666 | - | GTGACCTATGCACCAGACGTAAAAAATAAATCACAATTGCAAACTACTTGCAGTACTTAAGATCGGAAGAGCGGTTTCAG    |
| chr13 | 113973734 | 113973773 | LAMP1_4667 | - | GTGACCTATGCACCAGACGTAGTGAGGGGAGATTAGGTTCTGGGTTTCTATAACCATCAAGATCGGAAGAGCGGTTTCAG    |
| chr13 | 113974610 | 113974649 | LAMP1_4668 | - | GTGACCTATGCACCAGACGTCAAGCAAGCAAGTCAACCCCTAGCTCAGGTTCTCCACACAGATCGGAAGAGCGGTTTCAG    |
| chr13 | 113975669 | 113975708 | LAMP1_4669 | - | GTGACCTATGCACCAGACGTAAAATGATCTTAACTCAGGACAGATTCATAGAAAGATGAGATCGGAAGAGCGGTTTCAG     |
| chr13 | 113976547 | 113976586 | LAMP1_4670 | - | GTGACCTATGCACCAGACGTAGACCGGATGTTGTCAAGGCTCTGCTCACACAGGGCCCTGCAGATCGGAAGAGCGGTTTCAG  |
| chr11 | 18418340  | 18418379  | LDHA_4671  | - | GTGACCTATGCACCAGACGTGAACCAAAAGGAATCTATAGGAGGAAAAACATTTAGTGTGATCGGAAGAGCGGTTTCAG     |
| chr11 | 18420928  | 18420967  | LDHA_4672  | - | GTGACCTATGCACCAGACGTTCAAATCTTTAGTTAAATGGAAAATGCCACTTCTAGATTAGATCGGAAGAGCGGTTTCAG    |
| chr11 | 18422334  | 18422373  | LDHA_4673  | - | GTGACCTATGCACCAGACGTGGGGAATAATGACCAGATTAAGGCCTTTAGAATAAATTTAGATCGGAAGAGCGGTTTCAG    |
| chr11 | 18424337  | 18424376  | LDHA_4674  | - | GTGACCTATGCACCAGACGTGGAGAAAAATAAATCACCATTATCTCTCCCTACACACAGATCGGAAGAGCGGTTTCAG      |
| chr11 | 18425191  | 18425230  | LDHA_4675  | - | GTGACCTATGCACCAGACGTAGTACAGACTATTATTTTATGTTACCAACAGATTAGATCGGAAGAGCGGTTTCAG         |
| chr11 | 18426946  | 18426985  | LDHA_4676  | - | GTGACCTATGCACCAGACGTGAAACCATAGGTAAGGAGCAAAAAAGCAGGGTGGGAGAAAGATCGGAAGAGCGGTTTCAG    |
| chr11 | 18428614  | 18428653  | LDHA_4677  | - | GTGACCTATGCACCAGACGTAATGAAAAAATAAATCTCACATTTTGTCTATGCATTCCAGATCGGAAGAGCGGTTTCAG     |
| chr2  | 33173892  | 33173931  | LTBP1_4678 | - | GTGACCTATGCACCAGACGTGCAAGATCGCTGAGTCCAGCAGCAGAAAGACCCCTTCCCAGATCGGAAGAGCGGTTTCAG    |
| chr2  | 33245926  | 33245965  | LTBP1_4679 | - | GTGACCTATGCACCAGACGTAAAAACAGAAAGGCACAGCTTTGAAGAACAACATTGTAGACTAGATCGGAAGAGCGGTTTCAG |
| chr2  | 33335599  | 33335638  | LTBP1_4680 | - | GTGACCTATGCACCAGACGTACAAAATAAAGAGAAGGAATTAATAATGGGCTTTAAAAAGATCGGAAGAGCGGTTTCAG     |
| chr2  | 33359810  | 33359849  | LTBP1_4681 | - | GTGACCTATGCACCAGACGTAGGCAGGGAGAAAAAACAACACACATCAGCTTAGTAAGATCGGAAGAGCGGTTTCAG       |
| chr2  | 33411873  | 33411912  | LTBP1_4682 | - | GTGACCTATGCACCAGACGTAAAGAGAAAAACATGGAGAGTTGGTTAGTCTCTCAGAGGCTAGATCGGAAGAGCGGTTTCAG  |
| chr2  | 33413594  | 33413633  | LTBP1_4683 | - | GTGACCTATGCACCAGACGTTTGGGAGGAAAACTTGTGATGCTGAATAACTAACAGGCAAGATCGGAAGAGCGGTTTCAG    |
| chr2  | 33442569  | 33442608  | LTBP1_4684 | - | GTGACCTATGCACCAGACGTTAGTGTGAAATATGAAGGTTAATTGAGTGCAGGATGCCAGATCGGAAGAGCGGTTTCAG     |
| chr2  | 33447097  | 33447136  | LTBP1_4685 | - | GTGACCTATGCACCAGACGTAGAAATGCTTTGTACATCTTAAATCTTCAACTCTTAGAGATCGGAAGAGCGGTTTCAG      |
| chr2  | 33468679  | 33468718  | LTBP1_4686 | - | GTGACCTATGCACCAGACGTACACAATCTTTAGAAAGGAGCAGTCAAGCCCATGAGCAAGATCGGAAGAGCGGTTTCAG     |
| chr2  | 33477694  | 33477733  | LTBP1_4687 | - | GTGACCTATGCACCAGACGTGAGATAAAGCCGACATTACATGAGAAACCAAACTACATAGATCGGAAGAGCGGTTTCAG     |
| chr2  | 33482301  | 33482340  | LTBP1_4688 | - | GTGACCTATGCACCAGACGTGATGGGAAATATCTCTTTAAAAATCTAACAGTCAAAACAGATCGGAAGAGCGGTTTCAG     |
| chr2  | 33484605  | 33484644  | LTBP1_4689 | - | GTGACCTATGCACCAGACGTAAAAAGAAAAGGGTATTAGTACCATTAAAGACAATTAGTAGATCGGAAGAGCGGTTTCAG    |
| chr2  | 33487739  | 33487778  | LTBP1_4690 | - | GTGACCTATGCACCAGACGTGATTTAAAAAGAGAATAAGAAAAAAGAAATGAAAGAGATCGGAAGAGCGGTTTCAG        |
| chr2  | 33488311  | 33488350  | LTBP1_4691 | - | GTGACCTATGCACCAGACGTAAGCAGAGGATAAAAAAGAAAATTAAGCCCTTATGTGCAAGATCGGAAGAGCGGTTTCAG    |
| chr2  | 33498673  | 33498712  | LTBP1_4692 | - | GTGACCTATGCACCAGACGTAAAATAAATGTTGAAAAAACCCACAGAAATGAACAGATAGATCGGAAGAGCGGTTTCAG     |
| chr2  | 33499982  | 33500021  | LTBP1_4693 | - | GTGACCTATGCACCAGACGTAAATACATATAAAAAATATTAGTTCTGTGTAGCAAGAACTTAGATCGGAAGAGCGGTTTCAG  |
| chr2  | 33500818  | 33500857  | LTBP1_4694 | - | GTGACCTATGCACCAGACGTGATAGCATTGTTGAGTTTTGTGTTCAAATACTGTTTCAGATCGGAAGAGCGGTTTCAG      |
| chr2  | 33505056  | 33505095  | LTBP1_4695 | - | GTGACCTATGCACCAGACGTAAAAACCTAGGTCGTGAACATTTTATCAGAAATACCAAAACAGATCGGAAGAGCGGTTTCAG  |
| chr2  | 33518177  | 33518216  | LTBP1_4696 | - | GTGACCTATGCACCAGACGTGTTGCGTAATGAAAGAAACAAAAAAGAAAGAAAAAGATCGGAAGAGCGGTTTCAG         |
| chr2  | 33525468  | 33525507  | LTBP1_4697 | - | GTGACCTATGCACCAGACGTAAACAGGCAATTTTTCTGAAAAAGAGACTACCAGGAGAAAGATCGGAAGAGCGGTTTCAG    |
| chr2  | 33526539  | 33526578  | LTBP1_4698 | - | GTGACCTATGCACCAGACGTGAGAATACAAAAGAACTGTGGAAGTGGTCTTCAAAAACAGATCGGAAGAGCGGTTTCAG     |

|       |           |           |             |   |                                                                                    |
|-------|-----------|-----------|-------------|---|------------------------------------------------------------------------------------|
| chr2  | 33534451  | 33534490  | LTBP1_4699  | - | GTGACCTATGCACCAGACGTATTTAAAAATTTTTAAAGACTAAATAAATCACATATCGGAAGATCGGAAGAGCGGTTCCAG  |
| chr2  | 33540161  | 33540200  | LTBP1_4700  | - | GTGACCTATGCACCAGACGTAAATAGAGTCTTAAAAAATTGAAAAAATCGGTTTCATTAGATCGGAAGAGCGGTTCCAG    |
| chr2  | 33567855  | 33567894  | LTBP1_4701  | - | GTGACCTATGCACCAGACGTGACATGGAACATCAGACACAAAACAAACACAGGCTGACAAAGATCGGAAGAGCGGTTCCAG  |
| chr2  | 33572384  | 33572423  | LTBP1_4702  | - | GTGACCTATGCACCAGACGTGAGCACAGACCAAGTGAATGTGTGCCTCATTACAGACAGAGATCGGAAGAGCGGTTCCAG   |
| chr2  | 33585614  | 33585653  | LTBP1_4703  | - | GTGACCTATGCACCAGACGTAGAGAAAGTAGAGTGACAATAGGCACATCAGAACTACCAGATCGGAAGAGCGGTTCCAG    |
| chr2  | 33586446  | 33586485  | LTBP1_4704  | - | GTGACCTATGCACCAGACGTAAGAGACAAAAAAGATTTCAACATCTTCCATGAAGATCGGAAGAGCGGTTCCAG         |
| chr2  | 33588407  | 33588446  | LTBP1_4705  | - | GTGACCTATGCACCAGACGTAAAAAATTGAGAAATCAAAAAAGAGTTAGGTTTGATCTTTAGATCGGAAGAGCGGTTCCAG  |
| chr2  | 33589233  | 33589272  | LTBP1_4706  | - | GTGACCTATGCACCAGACGTAAAAAAGTATTACTAAAGAAAATCAGCCATCAGTTGTACAGATCGGAAGAGCGGTTCCAG   |
| chr2  | 33590350  | 33590389  | LTBP1_4707  | - | GTGACCTATGCACCAGACGTAGACATAGTTCCATGAAAATCGCACAGTTATTCATTTAAGATCGGAAGAGCGGTTCCAG    |
| chr2  | 33614201  | 33614240  | LTBP1_4708  | - | GTGACCTATGCACCAGACGTGACAAGCAGCATGAGGCCCCACCAGTGTAGCTCGACCTAGATCGGAAGAGCGGTTCCAG    |
| chr2  | 33622150  | 33622189  | LTBP1_4709  | - | GTGACCTATGCACCAGACGTAAGGGCAGAAGCTAAGTTAGAGCTTCTCAACTTCTATATAGATCGGAAGAGCGGTTCCAG   |
| chr2  | 33623381  | 33623420  | LTBP1_4710  | - | GTGACCTATGCACCAGACGTTCAAGCCAGTCAAGGTAACAATCTGGATATTATCTGTGAGATCGGAAGAGCGGTTCCAG    |
| chr16 | 30127939  | 30127978  | MAPK3_4711  | - | GTGACCTATGCACCAGACGTCATCTCTGCACCCTGGGGCCTGTTGAGTGTCTCCATGGCCAGATCGGAAGAGCGGTTCCAG  |
| chr16 | 30128108  | 30128147  | MAPK3_4712  | - | GTGACCTATGCACCAGACGTTGCCAGGCCTGAGCCTTGCTGTCTTACCACCCAGCCAGAGATCGGAAGAGCGGTTCCAG    |
| chr16 | 30128165  | 30128204  | MAPK3_4713  | - | GTGACCTATGCACCAGACGTCCCCAGCAGCAGTGGGGCTGGGGGCAGGGGAGCAGGGGGGAGATCGGAAGAGCGGTTCCAG  |
| chr16 | 30128425  | 30128464  | MAPK3_4714  | - | GTGACCTATGCACCAGACGTCATGAGGGTGGGTGTGGGATAAACCTTGGGTGTCTGGAGAGATCGGAAGAGCGGTTCCAG   |
| chr16 | 30128941  | 30128980  | MAPK3_4715  | - | GTGACCTATGCACCAGACGTCGCCGCTGGCTGAGTTGGGGATGATTAGCTTTTCCGAGGTAGATCGGAAGAGCGGTTCCAG  |
| chr16 | 30129318  | 30129357  | MAPK3_4716  | - | GTGACCTATGCACCAGACGTCGCCACTCTGAAAGAACCGACAGTCCAGGAAGCAGATCGGAAGAGCGGTTCCAG         |
| chr16 | 30129620  | 30129659  | MAPK3_4717  | - | GTGACCTATGCACCAGACGTTGGGCACCTGTCCCTCTCCCCAGGCTCTGGGGCTCCAGATCGGAAGAGCGGTTCCAG      |
| chr16 | 30133095  | 30133134  | MAPK3_4718  | - | GTGACCTATGCACCAGACGTCCTTGCCAGTCCGGCTGGTCAAGGCACGGCTCGCAGCTGGAGATCGGAAGAGCGGTTCCAG  |
| chr16 | 30134311  | 30134350  | MAPK3_4719  | - | GTGACCTATGCACCAGACGTGTTCCGGGGGAGGGGTGCCCTCAGGGGAGGGGGCTTCGAGATCGGAAGAGCGGTTCCAG    |
| chr10 | 89264623  | 89264662  | MINPP1_4720 | - | GTGACCTATGCACCAGACGTGTCAGTGGAGTGCGCCGAGCCAGCTGCAGATGCCCGTTAGATCGGAAGAGCGGTTCCAG    |
| chr10 | 89268043  | 89268082  | MINPP1_4721 | - | GTGACCTATGCACCAGACGTAAAAAATTATATGTTATTGTAATCACTGACATAAATGAAGATCGGAAGAGCGGTTCCAG    |
| chr10 | 89272831  | 89272870  | MINPP1_4722 | - | GTGACCTATGCACCAGACGTGCAAAAGGTAAAAATTTGGGGTTCATTATTTTCTGCAATTTAGATCGGAAGAGCGGTTCCAG |
| chr10 | 89311789  | 89311828  | MINPP1_4723 | - | GTGACCTATGCACCAGACGTAAATTAAGAGAAAATAAGGTATATATTAATGTCATAGAAGATCGGAAGAGCGGTTCCAG    |
| chr10 | 89264941  | 89264980  | MINPP1_4724 | - | GTGACCTATGCACCAGACGTCTCAGCTTGCAGTCTGTTTGACCGTGGGGTAGCGGTTGCAGATCGGAAGAGCGGTTCCAG   |
| chr11 | 118307178 | 118307217 | MLL_4725    | - | GTGACCTATGCACCAGACGTTGAAGTGAAGCAGCGAGAGGGAGAGGCGACAACACAGGGGAGATCGGAAGAGCGGTTCCAG  |
| chr11 | 118339440 | 118339479 | MLL_4726    | - | GTGACCTATGCACCAGACGTGAAAAATTTTAAAAATCAGAAGCAAAAACGTCATACAAGATCGGAAGAGCGGTTCCAG     |
| chr11 | 118342327 | 118342366 | MLL_4727    | - | GTGACCTATGCACCAGACGTAAATTAACAAATGAAGACCATATATTAGCTGTGTAGTTAGATCGGAAGAGCGGTTCCAG    |
| chr11 | 118347470 | 118347509 | MLL_4728    | - | GTGACCTATGCACCAGACGTGGCAATCCAAAAACAATAACAACATCATCATGTTGAAATTAAGATCGGAAGAGCGGTTCCAG |
| chr11 | 118348632 | 118348671 | MLL_4729    | - | GTGACCTATGCACCAGACGTAATGTGGCATTAGTTCCAAGGGAGTACTGAATTCAAACCTAGATCGGAAGAGCGGTTCCAG  |
| chr11 | 118350839 | 118350878 | MLL_4730    | - | GTGACCTATGCACCAGACGTAACGAATAAACCATGAAACAATAAATTTAGAAGAAAAGAGATCGGAAGAGCGGTTCCAG    |
| chr11 | 118352380 | 118352419 | MLL_4731    | - | GTGACCTATGCACCAGACGTAACACAACAACATCATCTGTCTATAGTGAATAAATTTAAGATCGGAAGAGCGGTTCCAG    |
| chr11 | 118353087 | 118353126 | MLL_4732    | - | GTGACCTATGCACCAGACGTCAGAATAAATTCGAGTCAGATGCTGGCAACGACTACTTTAAGATCGGAAGAGCGGTTCCAG  |
| chr11 | 118354848 | 118354887 | MLL_4733    | - | GTGACCTATGCACCAGACGTAAAAAGGTAAATATAAGAAAACAAACACACCTATTGCTTTAGATCGGAAGAGCGGTTCCAG  |
| chr11 | 118355527 | 118355566 | MLL_4734    | - | GTGACCTATGCACCAGACGTAGAAAGGTCACTTAGGAAAAGTTTTACAATACACAACCTTTAGATCGGAAGAGCGGTTCCAG |
| chr11 | 118359279 | 118359318 | MLL_4735    | - | GTGACCTATGCACCAGACGTAACATGGGAAGATAGAAGTATGTCAAATAATATGTAGAAAAGATCGGAAGAGCGGTTCCAG  |
| chr11 | 118360457 | 118360496 | MLL_4736    | - | GTGACCTATGCACCAGACGTATATAATGGCAAAAAGATAAGCATCATATTACCTTCACCAGATCGGAAGAGCGGTTCCAG   |
| chr11 | 118360794 | 118360833 | MLL_4737    | - | GTGACCTATGCACCAGACGTAGAAAAGAAATCAATAGGAATTTCTTGTTTTAAATATCTAGATCGGAAGAGCGGTTCCAG   |
| chr11 | 118361861 | 118361900 | MLL_4738    | - | GTGACCTATGCACCAGACGTAGCAAAGTTTACAGCAGTCTTTGGCTCACATACCCGTGTAGATCGGAAGAGCGGTTCCAG   |
| chr11 | 118362409 | 118362448 | MLL_4739    | - | GTGACCTATGCACCAGACGTAAAAACCTACCATGATGAGGCTCTGAAAGAATGAGAGAGATCGGAAGAGCGGTTCCAG     |
| chr11 | 118363722 | 118363761 | MLL_4740    | - | GTGACCTATGCACCAGACGTGAAAGATATGTTGCTTTTCTAACACTAAAACCAAGGTGAGATCGGAAGAGCGGTTCCAG    |
| chr11 | 118364953 | 118364992 | MLL_4741    | - | GTGACCTATGCACCAGACGTAAACAAAATGTTAATTTCTTAAAACAGTGTGCTCTGAAAGATCGGAAGAGCGGTTCCAG    |
| chr11 | 118365359 | 118365398 | MLL_4742    | - | GTGACCTATGCACCAGACGTACACAAAACAAAATGTAATATGTAACACTCATTTAGATAAGATCGGAAGAGCGGTTCCAG   |
| chr11 | 118366926 | 118366965 | MLL_4743    | - | GTGACCTATGCACCAGACGTAAAAAGACTCCCATCAATACCTTTGAGATCCAGTTAAAATGAGATCGGAAGAGCGGTTCCAG |
| chr11 | 118368601 | 118368640 | MLL_4744    | - | GTGACCTATGCACCAGACGTAAAGAGTCTTTTTTCTTAAAGAAATAATGCCAAAGAAAGATCGGAAGAGCGGTTCCAG     |
| chr11 | 118369035 | 118369074 | MLL_4745    | - | GTGACCTATGCACCAGACGTAAAAAGAACAGAGTCTTATTAGACATTTTATATGTTTTAAAGATCGGAAGAGCGGTTCCAG  |
| chr11 | 118369968 | 118370007 | MLL_4746    | - | GTGACCTATGCACCAGACGTACCCATGGTAGCTGTTAATAGGCTGTCCCTTGCACATTAAGATCGGAAGAGCGGTTCCAG   |
| chr11 | 118371652 | 118371691 | MLL_4747    | - | GTGACCTATGCACCAGACGTAGATTTGGGAAAATCATCATAAGGGAGAGGATAGAAGCAGAGATCGGAAGAGCGGTTCCAG  |
| chr11 | 118372337 | 118372376 | MLL_4748    | - | GTGACCTATGCACCAGACGTAAATAAAAACTCTTAACTAAAAAGGCCAATTAATAATCAGATCGGAAGAGCGGTTCCAG    |
| chr11 | 118373063 | 118373102 | MLL_4749    | - | GTGACCTATGCACCAGACGTGAGAAAAGTAAATAATGCTATTGTAGATAAACAATGTAGATCGGAAGAGCGGTTCCAG     |
| chr11 | 118378194 | 118378233 | MLL_4750    | - | GTGACCTATGCACCAGACGTGGCATTGTATCTTTTCAAGACAACCCAGTAATATGAGATCGGAAGAGCGGTTCCAG       |
| chr11 | 118379801 | 118379840 | MLL_4751    | - | GTGACCTATGCACCAGACGTACCAAAATGTAAGATAAATATCAGCTAGTCTTCAATTCAGATCGGAAGAGCGGTTCCAG    |
| chr11 | 118382616 | 118382655 | MLL_4752    | - | GTGACCTATGCACCAGACGTATAAAGAAAACCCGTAAGCCAGAAAATATGCACGTAACCCAGATCGGAAGAGCGGTTCCAG  |
| chr11 | 118390283 | 118390322 | MLL_4753    | - | GTGACCTATGCACCAGACGTGAGAAAGCAGAGGAAAGTGAAGAGCGCAGTCAACAGGAAAAGATCGGAAGAGCGGTTCCAG  |
| chr11 | 118390622 | 118390661 | MLL_4754    | - | GTGACCTATGCACCAGACGTAAGATTAACACATATTTAGAGAAAATGCTTTAATAAAGCAGAGATCGGAAGAGCGGTTCCAG |
| chr11 | 118391467 | 118391506 | MLL_4755    | - | GTGACCTATGCACCAGACGTAGACACTATTAAAGCAATTTTTTCAAGAAAATGTTTGTAGATCGGAAGAGCGGTTCCAG    |
| chr11 | 118391953 | 118391992 | MLL_4756    | - | GTGACCTATGCACCAGACGTGAGAAAAGGTCAGACACAAAATTTTGAAGTAAAGTTAGATCGGAAGAGCGGTTCCAG      |

|       |           |           |           |   |                                                                                        |
|-------|-----------|-----------|-----------|---|----------------------------------------------------------------------------------------|
| chr11 | 118392562 | 118392601 | MLL_4757  | - | GTGACCTATGCACCAGACGTAGAAGAAGGGAGAAGAACTTGTCACTTTCTATAAACTCAGAGATCGGAAGAGCGGTTTCAG      |
| chr11 | 118342769 | 118342808 | MLL_4758  | - | GTGACCTATGCACCAGACGTTCCCTTCTGTTGATGGAGGCCCTTCTCCTCCGTCGTACAATAGATCGGAAGAGCGGTTTCAG     |
| chr11 | 118343211 | 118343250 | MLL_4759  | - | GTGACCTATGCACCAGACGTGAAGATCCACAGGACGGGGCACTGAATCTACTATTCCGGTGAAGATCGGAAGAGCGGTTTCAG    |
| chr11 | 118343653 | 118343692 | MLL_4760  | - | GTGACCTATGCACCAGACGTCCTTGCATAGGAGCAGTGAAGCAGGCAAAAATGGTGATAGATCGGAAGAGCGGTTTCAG        |
| chr11 | 118344095 | 118344134 | MLL_4761  | - | GTGACCTATGCACCAGACGTAGTGAAGAAGGATCTTGGTTTCAGATCGAATAGGACTAAAAGATCGGAAGAGCGGTTTCAG      |
| chr11 | 118373535 | 118373574 | MLL_4762  | - | GTGACCTATGCACCAGACGTGACGCTCCCTCTGAGCTCTGGAACCTCAGCACTTTGGTCTTAGATCGGAAGAGCGGTTTCAG     |
| chr11 | 118374007 | 118374046 | MLL_4763  | - | GTGACCTATGCACCAGACGTGGTTGGCCCATACTCAGGAGTCAAACCTCATCCATAAAGATCGGAAGAGCGGTTTCAG         |
| chr11 | 118374479 | 118374518 | MLL_4764  | - | GTGACCTATGCACCAGACGTGAGTGGGGTAAAGCCAAAAACATGTTAGAACGTGCACGGAGATCGGAAGAGCGGTTTCAG       |
| chr11 | 118374951 | 118374990 | MLL_4765  | - | GTGACCTATGCACCAGACGTGTTTTAACTCTGCTTACAGAATGGCAGTTATCCATCTTAGATCGGAAGAGCGGTTTCAG        |
| chr11 | 118375423 | 118375462 | MLL_4766  | - | GTGACCTATGCACCAGACGTAGTCTACTGGGATTCTGGCTGGGGACAGTGGGACTCCGGGAGATCGGAAGAGCGGTTTCAG      |
| chr11 | 118375895 | 118375934 | MLL_4767  | - | GTGACCTATGCACCAGACGTAGAGGTCAATTGGATTTTTGGGTCACTCCATTTGGAAGAAGATCGGAAGAGCGGTTTCAG       |
| chr11 | 118376367 | 118376406 | MLL_4768  | - | GTGACCTATGCACCAGACGTAGGAAGCTGGGAGGGTGAAGTTAATCAATGTCATATTAGATCGGAAGAGCGGTTTCAG         |
| chr11 | 118376839 | 118376878 | MLL_4769  | - | GTGACCTATGCACCAGACGTGTTATTGCAGCAGTAGAGGGGGTGTGTGATGTCCCAGATTAGATCGGAAGAGCGGTTTCAG      |
| chr7  | 151833867 | 151833906 | MLL3_4770 | - | GTGACCTATGCACCAGACGTTTCTAGCTCAGCGGGCGGCTTGTCCCTAGGAAGAGGCGAAGATCGGAAGAGCGGTTTCAG       |
| chr7  | 151835831 | 151835870 | MLL3_4771 | - | GTGACCTATGCACCAGACGTGAGAGATTGCATCTGCCATGTTGTTTCAGATCCTGGGCGAAAGATCGGAAGAGCGGTTTCAG     |
| chr7  | 151836221 | 151836260 | MLL3_4772 | - | GTGACCTATGCACCAGACGTGAGGAACCTGACGGGGAGTGCTTTTGTCTGTGGGGCCAGTAGATCGGAAGAGCGGTTTCAG      |
| chr7  | 151836710 | 151836749 | MLL3_4773 | - | GTGACCTATGCACCAGACGTGGTCCCGAGATTGATACACAGCACCATCATCTCCAGATCGGAAGAGCGGTTTCAG            |
| chr7  | 151841748 | 151841787 | MLL3_4774 | - | GTGACCTATGCACCAGACGTACTTTGCTAGCAGGAAGTGGAGAGCGGGTGTGAGTGTCCCAGATTAGATCGGAAGAGCGGTTTCAG |
| chr7  | 151842188 | 151842227 | MLL3_4775 | - | GTGACCTATGCACCAGACGTTTAACTTACATAGTACAGCCAGGGTTTCTAGGCGTATTAGATCGGAAGAGCGGTTTCAG        |
| chr7  | 151843634 | 151843673 | MLL3_4776 | - | GTGACCTATGCACCAGACGTTGGTCAGGCTTTGAGATTGGAATTGCTTTTCTGATTGATAGATCGGAAGAGCGGTTTCAG       |
| chr7  | 151845068 | 151845107 | MLL3_4777 | - | GTGACCTATGCACCAGACGTCCGTTACATGCTGTGCAGTGTCTACTTACTCTGATGTCAGAGATCGGAAGAGCGGTTTCAG      |
| chr7  | 151848477 | 151848516 | MLL3_4778 | - | GTGACCTATGCACCAGACGTACTCCTTTTATGACCCACCTCCTACCTCCAGCGAAAATGAGATCGGAAGAGCGGTTTCAG       |
| chr7  | 151849740 | 151849779 | MLL3_4779 | - | GTGACCTATGCACCAGACGTGAGCTTTTTGTTAACCCCAAATCCATTCTGATTCAAAGAGATCGGAAGAGCGGTTTCAG        |
| chr7  | 151851045 | 151851084 | MLL3_4780 | - | GTGACCTATGCACCAGACGTGTTAATGACTTCTTAATGTTAAACGATGTTGCTCCCAATTTTTCAGATCGGAAGAGCGGTTTCAG  |
| chr7  | 151851302 | 151851341 | MLL3_4781 | - | GTGACCTATGCACCAGACGTCACTTAACTTATTATTTCCCTTTTACTACTACGCCAATTTAAGATCGGAAGAGCGGTTTCAG     |
| chr7  | 151852945 | 151852984 | MLL3_4782 | - | GTGACCTATGCACCAGACGTTTTTTTTCTCAAATAATCTTAGTATTCTTCTTTTAAAGATCGGAAGAGCGGTTTCAG          |
| chr7  | 151853240 | 151853279 | MLL3_4783 | - | GTGACCTATGCACCAGACGTAGCCTCAAATTTACACCTCGGAGAAATGTGCCTCTGCCAGATCGGAAGAGCGGTTTCAG        |
| chr7  | 151859152 | 151859191 | MLL3_4784 | - | GTGACCTATGCACCAGACGTATCAAAAAACGACAACCTTTTTTCTTTTGTTTAAATATAGATCGGAAGAGCGGTTTCAG        |
| chr7  | 151864181 | 151864220 | MLL3_4785 | - | GTGACCTATGCACCAGACGTGGTTTGCAAAATGAAACTCAACCAATTAATGAGTAGAAAGATCGGAAGAGCGGTTTCAG        |
| chr7  | 151866221 | 151866260 | MLL3_4786 | - | GTGACCTATGCACCAGACGTGTTCTAATAAGTAAATGTTTCTGGGGATTGCTTGTCTGCAAGATCGGAAGAGCGGTTTCAG      |
| chr7  | 151868299 | 151868338 | MLL3_4787 | - | GTGACCTATGCACCAGACGTCTGTAATGAGTCCCTCTAGAATGCACGCTTTTCTGTTTCCAGATCGGAAGAGCGGTTTCAG      |
| chr7  | 151871166 | 151871205 | MLL3_4788 | - | GTGACCTATGCACCAGACGTTGGCTGCTTGTCTTACTGGGCATCTAGACATTCATGAAAAGATCGGAAGAGCGGTTTCAG       |
| chr7  | 151873226 | 151873265 | MLL3_4789 | - | GTGACCTATGCACCAGACGTTCTTGAGTCTCAACGTATATTACTATGGGTATTAGAGTGGAGATCGGAAGAGCGGTTTCAG      |
| chr7  | 151876869 | 151876908 | MLL3_4790 | - | GTGACCTATGCACCAGACGTTAATTTCTGCCGAATTTAAATGCTATTAGAAGAGGGAAAGATCGGAAGAGCGGTTTCAG        |
| chr7  | 151877746 | 151877785 | MLL3_4791 | - | GTGACCTATGCACCAGACGTGATGTTCTCAAGTTTTAAATGATTATTGAGGAAGCTGAGATCGGAAGAGCGGTTTCAG         |
| chr7  | 151880009 | 151880048 | MLL3_4792 | - | GTGACCTATGCACCAGACGTTTTGGATAATCTACTTTTTGAAGTTGCATTTTTGTTTTGAAGATCGGAAGAGCGGTTTCAG      |
| chr7  | 151882593 | 151882632 | MLL3_4793 | - | GTGACCTATGCACCAGACGTAACTCCTCTATCTTTAAATATTTAAATACAGTGTGTAAGATCGGAAGAGCGGTTTCAG         |
| chr7  | 151884297 | 151884336 | MLL3_4794 | - | GTGACCTATGCACCAGACGTAATATATATTTCTGTTTTACCAACATTTTCACATGTGCAAGATCGGAAGAGCGGTTTCAG       |
| chr7  | 151884750 | 151884789 | MLL3_4795 | - | GTGACCTATGCACCAGACGTTATTTCTATGGAACCTAAATGCACTAATTTCTGTTTGAAGATCGGAAGAGCGGTTTCAG        |
| chr7  | 151891044 | 151891083 | MLL3_4796 | - | GTGACCTATGCACCAGACGTACTTTATAATCTACATTATATCACACACATGTGATATAGATCGGAAGAGCGGTTTCAG         |
| chr7  | 151891264 | 151891303 | MLL3_4797 | - | GTGACCTATGCACCAGACGTTTTGATTTTCTAGTTTTCTAATGAAAATGGCGTTCCCATACCAAGATCGGAAGAGCGGTTTCAG   |
| chr7  | 151891475 | 151891514 | MLL3_4798 | - | GTGACCTATGCACCAGACGTTGCCCTACATCTAGGCTTTCTAAAAGACCTGAGTAAATATAGATCGGAAGAGCGGTTTCAG      |
| chr7  | 151892942 | 151892981 | MLL3_4799 | - | GTGACCTATGCACCAGACGTATACTGTTTACCCTTTTTCTGGTTTCTGATGTGAGCGAGAAGATCGGAAGAGCGGTTTCAG      |
| chr7  | 151896314 | 151896353 | MLL3_4800 | - | GTGACCTATGCACCAGACGTTTATTACAGATATTTCTTTATATCATATAACATACATCAGATCGGAAGAGCGGTTTCAG        |
| chr7  | 151899969 | 151900008 | MLL3_4801 | - | GTGACCTATGCACCAGACGTGCTTTACATATTTTACATGGTTTGTAAATGAGGAAATAAGATCGGAAGAGCGGTTTCAG        |
| chr7  | 151904335 | 151904374 | MLL3_4802 | - | GTGACCTATGCACCAGACGTGAGGTAGACATTTCAATATCATCAACACTTGGTTAATTAAGATCGGAAGAGCGGTTTCAG       |
| chr7  | 151917558 | 151917597 | MLL3_4803 | - | GTGACCTATGCACCAGACGTTTTATTTTCCATGAAATATGTGTGCAAGAATTAAGCATAAGATCGGAAGAGCGGTTTCAG       |
| chr7  | 151919036 | 151919075 | MLL3_4804 | - | GTGACCTATGCACCAGACGTAATGCTTTACTTGATTTAATTAATTTACTTTGCTTAATTAGATCGGAAGAGCGGTTTCAG       |
| chr7  | 151919608 | 151919647 | MLL3_4805 | - | GTGACCTATGCACCAGACGTAATTTAAACTGTGAGTCTGCACTCTTGATCCACTCACTTGAGATCGGAAGAGCGGTTTCAG      |
| chr7  | 151921050 | 151921089 | MLL3_4806 | - | GTGACCTATGCACCAGACGTATTTTTTCTATCTTTTTAAAGCTTTTCTCTTTGAAATGTAGAGATCGGAAGAGCGGTTTCAG     |
| chr7  | 151921470 | 151921509 | MLL3_4807 | - | GTGACCTATGCACCAGACGTGTTTGGCTTGTGCTTAGTCTTTCAAGTTCAGAGCTTTCTAGATCGGAAGAGCGGTTTCAG       |
| chr7  | 151926958 | 151926997 | MLL3_4808 | - | GTGACCTATGCACCAGACGTTTTAATTTGAGTTAACAATAATGATTGAATTTTTTGGAGATCGGAAGAGCGGTTTCAG         |
| chr7  | 151927255 | 151927294 | MLL3_4809 | - | GTGACCTATGCACCAGACGTGACAATTTACTGTCTTCTCATTGAATTCCTCCTTGCACAAGATCGGAAGAGCGGTTTCAG       |
| chr7  | 151932852 | 151932891 | MLL3_4810 | - | GTGACCTATGCACCAGACGTTCTCATGTATTTTTCTCTAATCTAAATGTCAGTTAATGAAGATCGGAAGAGCGGTTTCAG       |
| chr7  | 151935742 | 151935781 | MLL3_4811 | - | GTGACCTATGCACCAGACGTTTGCATTTACATTCATATATCATTTCTGTCTGATTTGTTTAGATCGGAAGAGCGGTTTCAG      |
| chr7  | 151944937 | 151944976 | MLL3_4812 | - | GTGACCTATGCACCAGACGTTTTAATGATATTGACAGAAAAGATTTGGAACAATTCATAGATCGGAAGAGCGGTTTCAG        |
| chr7  | 151946911 | 151946950 | MLL3_4813 | - | GTGACCTATGCACCAGACGTTTTCATATTGCTAAATTTGATTGAGTTACAAGATAATGATCGGAAGAGCGGTTTCAG          |
| chr7  | 151947888 | 151947927 | MLL3_4814 | - | GTGACCTATGCACCAGACGTTTTAATGGATATACTGTTTTTGAAGAAAATGTGTATATAAGATCGGAAGAGCGGTTTCAG       |

|       |           |           |            |   |                                                                                     |
|-------|-----------|-----------|------------|---|-------------------------------------------------------------------------------------|
| chr7  | 151948974 | 151949013 | MLL3_4815  | - | GTGACCTATGCACCAGACGTGAATGATTTTTTTTTAAATTTTTTGTGTTTGTGTAATGTTGTAGATCGGAAGAGCGGTTTCAG |
| chr7  | 151949581 | 151949620 | MLL3_4816  | - | GTGACCTATGCACCAGACGTAGTTATTCTATTCAAGTTGTTTTGTCGATTGTTTTATTATAGATCGGAAGAGCGGTTTCAG   |
| chr7  | 151962073 | 151962112 | MLL3_4817  | - | GTGACCTATGCACCAGACGTATTTCAATTCAAAGCTGTGTATTGGGTTAAGAGGGACCCAGATCGGAAGAGCGGTTTCAG    |
| chr7  | 151970740 | 151970779 | MLL3_4818  | - | GTGACCTATGCACCAGACGTTACGGATAGACTTTAAACTTCAACCAATGTATTTACTGAAGATCGGAAGAGCGGTTTCAG    |
| chr7  | 152007001 | 152007040 | MLL3_4819  | - | GTGACCTATGCACCAGACGTAAAGCAAATATTTAAATCATAGTTTTATAACATTCACTTTAGATCGGAAGAGCGGTTTCAG   |
| chr7  | 152008833 | 152008872 | MLL3_4820  | - | GTGACCTATGCACCAGACGTGTTTTCAATAATGACTGCCTCTTAATCTGGAAGCATTTTTAGATCGGAAGAGCGGTTTCAG   |
| chr7  | 152012173 | 152012212 | MLL3_4821  | - | GTGACCTATGCACCAGACGTTCGACTTTAAATGTGGAAATGATTAAGACTGCATATAATAGATCGGAAGAGCGGTTTCAG    |
| chr7  | 152027636 | 152027675 | MLL3_4822  | - | GTGACCTATGCACCAGACGTGAATGCAGCTGGATTGGATATTAGTGACAGGAATAAAGCAAGATCGGAAGAGCGGTTTCAG   |
| chr7  | 152055622 | 152055661 | MLL3_4823  | - | GTGACCTATGCACCAGACGTTCAAGAATTTATAAGAAATGTATAATGATGCTTTGCATATGAGATCGGAAGAGCGGTTTCAG  |
| chr7  | 152132661 | 152132700 | MLL3_4824  | - | GTGACCTATGCACCAGACGTTGCGAGGGAGCCAGGCCGGGAGCCAGCGCGCGGCCGGGCAGATCGGAAGAGCGGTTTCAG    |
| chr7  | 151945296 | 151945335 | MLL3_4825  | - | GTGACCTATGCACCAGACGTAAATTCTGAACCTTTCTACTGGATTGATGGACTCTGAAATGAGATCGGAAGAGCGGTTTCAG  |
| chr7  | 151845441 | 151845480 | MLL3_4826  | - | GTGACCTATGCACCAGACGTTTCATGAGCAAGAATAAGTTACTTTGCAGTCTTCAGGAGATCGGAAGAGCGGTTTCAG      |
| chr7  | 151845814 | 151845853 | MLL3_4827  | - | GTGACCTATGCACCAGACGTGGCACTTCCCTTAAACCTGATGCTTGCCCAAAGACTATCAGATCGGAAGAGCGGTTTCAG    |
| chr7  | 151859579 | 151859618 | MLL3_4828  | - | GTGACCTATGCACCAGACGTAACAAACTGCCCAATAGTGATTTCTACAAGCAACTCAAAGATCGGAAGAGCGGTTTCAG     |
| chr7  | 151873681 | 151873720 | MLL3_4829  | - | GTGACCTATGCACCAGACGTCCACCAACTCTGCCGGCTCCCATCCAATCATGTGTCAAAGATCGGAAGAGCGGTTTCAG     |
| chr7  | 151878217 | 151878256 | MLL3_4830  | - | GTGACCTATGCACCAGACGTGAGGGGTTTTACTAGGTCCCTCAATGACAAGACCAGTCTAGATCGGAAGAGCGGTTTCAG    |
| chr7  | 151860006 | 151860045 | MLL3_4831  | - | GTGACCTATGCACCAGACGTTTTCTGGGACCAGCTCCAGCAGTCCCAGTGAGGCGCTTCTAGATCGGAAGAGCGGTTTCAG   |
| chr7  | 151874136 | 151874175 | MLL3_4832  | - | GTGACCTATGCACCAGACGTAGTGTCTGTTGACCAAAAAAGGAACAAGAAAGATCGGAAGAGCGGTTTCAG             |
| chr7  | 151878688 | 151878727 | MLL3_4833  | - | GTGACCTATGCACCAGACGTAAAGGCCTGCTTTGACACCAAGACCTATAGATAATTTTTTCAGATCGGAAGAGCGGTTTCAG  |
| chr7  | 151860433 | 151860472 | MLL3_4834  | - | GTGACCTATGCACCAGACGTAACGGGAACGTAAGGAACGTTTACGAGAACAGCAAGAGAGATCGGAAGAGCGGTTTCAG     |
| chr7  | 151874591 | 151874630 | MLL3_4835  | - | GTGACCTATGCACCAGACGTTTCTTGTCCATTCTCTATGGTCAATGAGGACTCTGAGATCGGAAGAGCGGTTTCAG        |
| chr7  | 151879159 | 151879198 | MLL3_4836  | - | GTGACCTATGCACCAGACGTGAAGAAATCTGCTGCACCAGTGGAAAATGTACACCTTTAGATCGGAAGAGCGGTTTCAG     |
| chr3  | 49924690  | 49924729  | MST1R_4837 | - | GTGACCTATGCACCAGACGTGGGCTGGACCTGCTTAGCTGCCTTGAGCTAACCCCAAGCTAGATCGGAAGAGCGGTTTCAG   |
| chr3  | 49927868  | 49927907  | MST1R_4838 | - | GTGACCTATGCACCAGACGTGGCCTGCCCTACAGTCCACATGCTTGTGGCACCACAAGAACAGATCGGAAGAGCGGTTTCAG  |
| chr3  | 49928580  | 49928619  | MST1R_4839 | - | GTGACCTATGCACCAGACGTAGAGTAGCTGGGGTGAAGCAAAGGACAGGGCATGAGGGTAGATCGGAAGAGCGGTTTCAG    |
| chr3  | 49928782  | 49928821  | MST1R_4840 | - | GTGACCTATGCACCAGACGTATCTGGCTCTGGGTTGGGGCTGGGCAGCAGCTGGAGAAGAGATCGGAAGAGCGGTTTCAG    |
| chr3  | 49929141  | 49929180  | MST1R_4841 | - | GTGACCTATGCACCAGACGTGAGAGATGGGAAGGACAGAGGGAGGGCCCTCAGGCTGGGAAGATCGGAAGAGCGGTTTCAG   |
| chr3  | 49932550  | 49932589  | MST1R_4842 | - | GTGACCTATGCACCAGACGTGAGGTGGGGCTGGGGCAGAGATGGAGTCTCAAGATGACATAGATCGGAAGAGCGGTTTCAG   |
| chr3  | 49932830  | 49932869  | MST1R_4843 | - | GTGACCTATGCACCAGACGTGGAGGCATGAGAAGCTAAAGCCACCCCTGCCCTACAAGATCGGAAGAGCGGTTTCAG       |
| chr3  | 49933098  | 49933137  | MST1R_4844 | - | GTGACCTATGCACCAGACGTGCTCCTACCTTTAATCAGCCCTACCCCCAACCAATGGCAGATCGGAAGAGCGGTTTCAG     |
| chr3  | 49933344  | 49933383  | MST1R_4845 | - | GTGACCTATGCACCAGACGTGAGTGGACCTCCCTGGGAAACACGGGCAGAGGGCCTACAAGATCGGAAGAGCGGTTTCAG    |
| chr3  | 49933578  | 49933617  | MST1R_4846 | - | GTGACCTATGCACCAGACGTGGGATAGGGGCAGGGACAGTTGGGGATCTGAAAGTAGGGGAGATCGGAAGAGCGGTTTCAG   |
| chr3  | 49933923  | 49933962  | MST1R_4847 | - | GTGACCTATGCACCAGACGTGCTGGCCAGGAGGGAGGAAGGCTGGATGAGTCCCTGAGCAGATCGGAAGAGCGGTTTCAG    |
| chr3  | 49934112  | 49934151  | MST1R_4848 | - | GTGACCTATGCACCAGACGTCTCTTTGCCACTCTGGCCCTGGGGAATGAGAGCCCAAGATCGGAAGAGCGGTTTCAG       |
| chr3  | 49934663  | 49934702  | MST1R_4849 | - | GTGACCTATGCACCAGACGTCCAGCCAGCATGGGAGGCCCGCAGGGTCTTATCCAGGTGGAGATCGGAAGAGCGGTTTCAG   |
| chr3  | 49934903  | 49934942  | MST1R_4850 | - | GTGACCTATGCACCAGACGTCTTGCCCTGTCTGTGCCCTTGCCAGTGCATGGTACGGGAAGATCGGAAGAGCGGTTTCAG    |
| chr3  | 49935434  | 49935473  | MST1R_4851 | - | GTGACCTATGCACCAGACGTGCCCTCCCTCCCTTTCCCTGAAGGGGAAACCAAGCAGAGATCGGAAGAGCGGTTTCAG      |
| chr3  | 49935901  | 49935940  | MST1R_4852 | - | GTGACCTATGCACCAGACGTCCCTGGCAGGGCACAGGTAAGAGTGGGACAGGCTGGGCCTGAGATCGGAAGAGCGGTTTCAG  |
| chr3  | 49936250  | 49936289  | MST1R_4853 | - | GTGACCTATGCACCAGACGTGAGGGGAGGGCCCTGGGGCCAGGGTGTGGGATCACAGACAGATCGGAAGAGCGGTTTCAG    |
| chr3  | 49936458  | 49936497  | MST1R_4854 | - | GTGACCTATGCACCAGACGTATCCCAAGTCCCTAGCCCTGGGTCCTTGTCTCCATCCAGATCGGAAGAGCGGTTTCAG      |
| chr3  | 49939763  | 49939802  | MST1R_4855 | - | GTGACCTATGCACCAGACGTAGAAGGGCCCTACTTGTGAGTGCATGCATGGCTGAAGATCGGAAGAGCGGTTTCAG        |
| chr3  | 49940173  | 49940212  | MST1R_4856 | - | GTGACCTATGCACCAGACGTACACGCCTGGCACGGCTTAGCGCCACTGAGCCAGAGTTGAGATCGGAAGAGCGGTTTCAG    |
| chr3  | 49940583  | 49940622  | MST1R_4857 | - | GTGACCTATGCACCAGACGTGGCCGCTGCTTCTGATGAGCTAGAGCCCAAGGGACAGAGATCGGAAGAGCGGTTTCAG      |
| chr1  | 155158561 | 155158600 | MUC1_4858  | - | GTGACCTATGCACCAGACGTCCCGCTGAGCTGAGTGGCCAGCCAGTGCCATTCCACTCCAAGATCGGAAGAGCGGTTTCAG   |
| chr1  | 155159651 | 155159690 | MUC1_4859  | - | GTGACCTATGCACCAGACGTGCCCCACAGCCAGGGGAAGCAGAGGGTTTGGCTGGGCAAGATCGGAAGAGCGGTTTCAG     |
| chr1  | 155159881 | 155159920 | MUC1_4860  | - | GTGACCTATGCACCAGACGTTCCTGGCCCTGATCAGAGCCCCCGGTGAGAAAGCCTCCAGATCGGAAGAGCGGTTTCAG     |
| chr1  | 155160148 | 155160187 | MUC1_4861  | - | GTGACCTATGCACCAGACGTTTTCCCTGGCTGACAGCCAGCACCATGCCGGGGCCCTCTCAGATCGGAAGAGCGGTTTCAG   |
| chr1  | 155160434 | 155160473 | MUC1_4862  | - | GTGACCTATGCACCAGACGTGGGTGTGGACCAAGTGTGGTGGTTGGAGGGTGGTGGTGGAGATCGGAAGAGCGGTTTCAG    |
| chr1  | 155160589 | 155160628 | MUC1_4863  | - | GTGACCTATGCACCAGACGTGCCCTTCCCTTCCCATGCTCCCTGAAGCAGCCATCAGAAGATCGGAAGAGCGGTTTCAG     |
| chr1  | 155161924 | 155161963 | MUC1_4864  | - | GTGACCTATGCACCAGACGTCCAGCAGCTACTCTCCAGCCACAGCCCCGGTTCCAGGCTCAGATCGGAAGAGCGGTTTCAG   |
| chr1  | 155162527 | 155162566 | MUC1_4865  | - | GTGACCTATGCACCAGACGTGAGGTGGGAGTGGGCTGCCCTGCTTAGTGGTCTTCGATAGATCGGAAGAGCGGTTTCAG     |
| chr10 | 76602566  | 76602605  | MYST4_4866 | - | GTGACCTATGCACCAGACGTGACTTCTTCAACAAAAGTTACCATAGAGGTTCTCTTAGATCGGAAGAGCGGTTTCAG       |
| chr10 | 76719678  | 76719717  | MYST4_4867 | - | GTGACCTATGCACCAGACGTATTAATAAAAAAATACTGTCACTTTTCCATTTCAAAGTAGATCGGAAGAGCGGTTTCAG     |
| chr10 | 76729368  | 76729407  | MYST4_4868 | - | GTGACCTATGCACCAGACGTAAAAAGCAAATGCTTGTGAGGGAAATGGTGCCTTTGACTTTAGATCGGAAGAGCGGTTTCAG  |
| chr10 | 76729728  | 76729767  | MYST4_4869 | - | GTGACCTATGCACCAGACGTACATATTAGAGACTAATTGAGACTGAAACCAACTGTAAAAGATCGGAAGAGCGGTTTCAG    |
| chr10 | 76732215  | 76732254  | MYST4_4870 | - | GTGACCTATGCACCAGACGTATATATGAGAAAAATTTAATGTTTTATTATTTAAGAGAGATCGGAAGAGCGGTTTCAG      |
| chr10 | 76735107  | 76735146  | MYST4_4871 | - | GTGACCTATGCACCAGACGTATTATAGAGAAATGATCAGCATTTAATAAATAGAATTATAAGATCGGAAGAGCGGTTTCAG   |
| chr10 | 76737024  | 76737063  | MYST4_4872 | - | GTGACCTATGCACCAGACGTAAACCAGCAAGAAATGATTACTGACTTGAATCATGATAGATCGGAAGAGCGGTTTCAG      |

|       |           |           |             |   |                                                                                    |
|-------|-----------|-----------|-------------|---|------------------------------------------------------------------------------------|
| chr10 | 76738932  | 76738971  | MYST4_4873  | - | GTGACCTATGCACCAGACGTGAAAGAAAAGAAAATAATAATATATATACTTCACTTACAAGATCGGAAGAGCGGTTTCAG   |
| chr10 | 76741495  | 76741534  | MYST4_4874  | - | GTGACCTATGCACCAGACGTTTAAAAATCATAGAATCTATCAGATAGATTATACTGTTGGAGATCGGAAGAGCGGTTTCAG  |
| chr10 | 76744788  | 76744827  | MYST4_4875  | - | GTGACCTATGCACCAGACGTGAAACAGACAACATTATTTAACATAAAAAATACTGCACCATAGATCGGAAGAGCGGTTTCAG |
| chr10 | 76748727  | 76748766  | MYST4_4876  | - | GTGACCTATGCACCAGACGTGAGAAAACAGATCAAGTATGTCAGAGCCCTGCTGAAGTGGGAGATCGGAAGAGCGGTTTCAG |
| chr10 | 76780290  | 76780329  | MYST4_4877  | - | GTGACCTATGCACCAGACGTAAAAATAAATGGGCATTCTCCTACTGTGGCATTCCCAGAGCAGATCGGAAGAGCGGTTTCAG |
| chr10 | 76780834  | 76780873  | MYST4_4878  | - | GTGACCTATGCACCAGACGTATAAGGCGAGAACAAGATGTAATCACAAGCTGAAATTTACAGATCGGAAGAGCGGTTTCAG  |
| chr10 | 76781589  | 76781628  | MYST4_4879  | - | GTGACCTATGCACCAGACGTAGGGTAAAATGTGGCCAGTGAGAGGGCAGTTACACAGCAGATCGGAAGAGCGGTTTCAG    |
| chr10 | 76784666  | 76784705  | MYST4_4880  | - | GTGACCTATGCACCAGACGTTTCCAAACATAACACATAAGAGCTCATGAGAAATTAATGAGATCGGAAGAGCGGTTTCAG   |
| chr10 | 76788197  | 76788236  | MYST4_4881  | - | GTGACCTATGCACCAGACGTAGACAAAAACGGGAAGGAAAAAAAACAGTCTTAGAAAGCAGATCGGAAGAGCGGTTTCAG   |
| chr10 | 76602876  | 76602915  | MYST4_4882  | - | GTGACCTATGCACCAGACGTATTACATGATCCTCTAGACCCTTGGCTGACTTAGGAAAAAGATCGGAAGAGCGGTTTCAG   |
| chr10 | 76735573  | 76735612  | MYST4_4883  | - | GTGACCTATGCACCAGACGTCTGGGGCTCTGACCGGAGATGGGGGTTGGGGGTGGAAGTGAGATCGGAAGAGCGGTTTCAG  |
| chr10 | 76789049  | 76789088  | MYST4_4884  | - | GTGACCTATGCACCAGACGTAGATTCGGGTACAGCTTCAGGGTCCCCAGCAAGCTCCTTGAGATCGGAAGAGCGGTTTCAG  |
| chr10 | 76789475  | 76789514  | MYST4_4885  | - | GTGACCTATGCACCAGACGTGATGTTCTGCGAGATGGCAGTGCAGATGGCACTTTGATCTAGATCGGAAGAGCGGTTTCAG  |
| chr10 | 76789901  | 76789940  | MYST4_4886  | - | GTGACCTATGCACCAGACGTCTCGGGGATTTTCAGCCAGCTGCATGGGTGGGGTGAAGTTAAGATCGGAAGAGCGGTTTCAG |
| chr10 | 76790327  | 76790366  | MYST4_4887  | - | GTGACCTATGCACCAGACGTCTGGTTCATGGAGATGTGGCCCTTGCTGGCAATCTGGAGATCGGAAGAGCGGTTTCAG     |
| chr12 | 78225192  | 78225231  | NAV3_4888   | - | GTGACCTATGCACCAGACGTAAATATCTTCTTCTGCTGCCAAAGAAAATGCTTCTAACCTCAGATCGGAAGAGCGGTTTCAG |
| chr12 | 78334049  | 78334088  | NAV3_4889   | - | GTGACCTATGCACCAGACGTGAGAGAAGGAAAAAGTGAGATGGGGTGGGGGAAAAACAGAGAGATCGGAAGAGCGGTTTCAG |
| chr12 | 78334811  | 78334850  | NAV3_4890   | - | GTGACCTATGCACCAGACGTGAGATAAAAAGAGAAAAAGAAAAAAGAACGCAGATCTTAAGATCGGAAGAGCGGTTTCAG   |
| chr12 | 78359959  | 78359998  | NAV3_4891   | - | GTGACCTATGCACCAGACGTAAAAGCAGTGAAAAAGCAACTTAGAGGATTATATTTTTAACAGATCGGAAGAGCGGTTTCAG |
| chr12 | 78362249  | 78362288  | NAV3_4892   | - | GTGACCTATGCACCAGACGTTGAAAAATACAAAAAAGAATCATATGTATTTAATGTCTTAGATCGGAAGAGCGGTTTCAG   |
| chr12 | 78388533  | 78388572  | NAV3_4893   | - | GTGACCTATGCACCAGACGTAGAAACAGAGAAATTAAGTAAAGAGATTCTTTGAACATGAGATCGGAAGAGCGGTTTCAG   |
| chr12 | 78392067  | 78392106  | NAV3_4894   | - | GTGACCTATGCACCAGACGTATAAGAAAAATTACATCATTATTGTACATTACAAAAAGTAGATCGGAAGAGCGGTTTCAG   |
| chr12 | 78400149  | 78400188  | NAV3_4895   | - | GTGACCTATGCACCAGACGTTTAGAGAAAAATAAGAAAAAGCCGATTAACTTTGATCAAGATCGGAAGAGCGGTTTCAG    |
| chr12 | 78415477  | 78415516  | NAV3_4896   | - | GTGACCTATGCACCAGACGTCTTGAATAAAGAAAGAAATAGCAGTTATAGTCTACTAGATCGGAAGAGCGGTTTCAG      |
| chr12 | 78443723  | 78443762  | NAV3_4897   | - | GTGACCTATGCACCAGACGTAAATGATAAATTTGCTATTTCATGACATTTAGTATCCTCAAGATCGGAAGAGCGGTTTCAG  |
| chr12 | 78444494  | 78444533  | NAV3_4898   | - | GTGACCTATGCACCAGACGTAAATGGAGAAATAACTATACTCTGGTTCACTTAGGGCCATAGATCGGAAGAGCGGTTTCAG  |
| chr12 | 78452726  | 78452765  | NAV3_4899   | - | GTGACCTATGCACCAGACGTATGTCTAATTAATTCACAGAAAACTAAATCAACTCAACTGAGATCGGAAGAGCGGTTTCAG  |
| chr12 | 78510502  | 78510541  | NAV3_4900   | - | GTGACCTATGCACCAGACGTGACATGCAAGAGCAGTGAATCAAACACAGGATGCACAATGAGATCGGAAGAGCGGTTTCAG  |
| chr12 | 78511757  | 78511796  | NAV3_4901   | - | GTGACCTATGCACCAGACGTAAATATTACAGAAAAACTTTATGTAGAAAAATTTATAAGAGATCGGAAGAGCGGTTTCAG   |
| chr12 | 78512967  | 78513006  | NAV3_4902   | - | GTGACCTATGCACCAGACGTGAAATAACACAATAATATGTGCCTGTAGAGTTTGATATCAAGATCGGAAGAGCGGTTTCAG  |
| chr12 | 78515670  | 78515709  | NAV3_4903   | - | GTGACCTATGCACCAGACGTAAACAATAACAACCTCAGTTGTTCCAAGAAGCTAATATCCAGATCGGAAGAGCGGTTTCAG  |
| chr12 | 78520897  | 78520936  | NAV3_4904   | - | GTGACCTATGCACCAGACGTAAAGAAAACCCCTAAGGACATAATGTAACAAAACCTTCAAGATCGGAAGAGCGGTTTCAG   |
| chr12 | 78522436  | 78522475  | NAV3_4905   | - | GTGACCTATGCACCAGACGTGCACAGCTATGACACTTAAGCACATCTACAAGGGCAAGGCAGATCGGAAGAGCGGTTTCAG  |
| chr12 | 78530907  | 78530946  | NAV3_4906   | - | GTGACCTATGCACCAGACGTAAACACACAGAGCCTTACTTCTTAAGCTTGAAGATGAAAGATCGGAAGAGCGGTTTCAG    |
| chr12 | 78534012  | 78534051  | NAV3_4907   | - | GTGACCTATGCACCAGACGTCAAAACAGACAATAAGATGTTAAACAATAAGGTCTACTCAAGATCGGAAGAGCGGTTTCAG  |
| chr12 | 78540099  | 78540138  | NAV3_4908   | - | GTGACCTATGCACCAGACGTATAAAAAAGAAAGACTTTAACTATAAAAACTATTTTCAATTAGATCGGAAGAGCGGTTTCAG |
| chr12 | 78542572  | 78542611  | NAV3_4909   | - | GTGACCTATGCACCAGACGTTTAAAAAATCAATGGAATAGGCAAGTAGATTTTTACTTAAAGATCGGAAGAGCGGTTTCAG  |
| chr12 | 78552933  | 78552972  | NAV3_4910   | - | GTGACCTATGCACCAGACGTAAATGGAAGAAACATAGTTTAAATGTCAGAATCTTATGTGGAGATCGGAAGAGCGGTTTCAG |
| chr12 | 78562485  | 78562524  | NAV3_4911   | - | GTGACCTATGCACCAGACGTAAACAGAGTTTGAAGCTTTAGTACCCGAAAGAAAAATAAAGATCGGAAGAGCGGTTTCAG   |
| chr12 | 78569036  | 78569075  | NAV3_4912   | - | GTGACCTATGCACCAGACGTAGGGAGAGTATCATCCGGCTCATGAAGAGTCTCGATCTGAGATCGGAAGAGCGGTTTCAG   |
| chr12 | 78570169  | 78570208  | NAV3_4913   | - | GTGACCTATGCACCAGACGTGTAAGAAAGAGTGTGAATTAACAATCAAGGGAATGAAGGCAGATCGGAAGAGCGGTTTCAG  |
| chr12 | 78570871  | 78570910  | NAV3_4914   | - | GTGACCTATGCACCAGACGTGACAGAAATTACCCTTCTTGTCTATTTGCACTTGGAGAGCAGATCGGAAGAGCGGTTTCAG  |
| chr12 | 78573259  | 78573298  | NAV3_4915   | - | GTGACCTATGCACCAGACGTAAACAAAACAGAATCAGTGGCCTGGGGAAGCCAGAGGATTAAGATCGGAAGAGCGGTTTCAG |
| chr12 | 78574601  | 78574640  | NAV3_4916   | - | GTGACCTATGCACCAGACGTGATGGAAAAACGAAAAAACTGAGTTGGTTTGATTGAGAAGATCGGAAGAGCGGTTTCAG    |
| chr12 | 78579331  | 78579370  | NAV3_4917   | - | GTGACCTATGCACCAGACGTTTAAAAGAAAGACATACACAACAGTATAACATTAGCTCAGAGATCGGAAGAGCGGTTTCAG  |
| chr12 | 78581978  | 78582017  | NAV3_4918   | - | GTGACCTATGCACCAGACGTACAAAATAAAAGTAAGATAAAAATCAAACCTGATCTTTTGAATCGGAAGAGCGGTTTCAG   |
| chr12 | 78582339  | 78582378  | NAV3_4919   | - | GTGACCTATGCACCAGACGTACACAAAAAATAAATCAAACAGAGGTTCAACTCATCAGATCGGAAGAGCGGTTTCAG      |
| chr12 | 78583714  | 78583753  | NAV3_4920   | - | GTGACCTATGCACCAGACGTAAACAAAAAATAGCATGATTTATTGTTCTACATAAGCTAAGATCGGAAGAGCGGTTTCAG   |
| chr12 | 78590977  | 78591016  | NAV3_4921   | - | GTGACCTATGCACCAGACGTATGAAGAAAAACAGATACGTCAAGTATAAATTTATACTAATAGATCGGAAGAGCGGTTTCAG |
| chr12 | 78594203  | 78594242  | NAV3_4922   | - | GTGACCTATGCACCAGACGTATAAATAACAAAATTTTTAAGAGTTATATTAATAATCTAGATCGGAAGAGCGGTTTCAG    |
| chr12 | 78598665  | 78598704  | NAV3_4923   | - | GTGACCTATGCACCAGACGTACCACGCGTTTAGGATATATAAAATGCATTTCTATTCAAGATCGGAAGAGCGGTTTCAG    |
| chr12 | 78604128  | 78604167  | NAV3_4924   | - | GTGACCTATGCACCAGACGTGAAAAAGACATCGATGATGGCAATGATGCATTGAGTAAGCAGATCGGAAGAGCGGTTTCAG  |
| chr12 | 78513321  | 78513360  | NAV3_4925   | - | GTGACCTATGCACCAGACGTGCTAACATGCAGCAACAACATCCTGATTCTGTGAACCGAGATCGGAAGAGCGGTTTCAG    |
| chr12 | 78400491  | 78400530  | NAV3_4926   | - | GTGACCTATGCACCAGACGTACTGGGAGGCTGCGGGGGGCGTAAAGCAGTCCGGGCATTGAGATCGGAAGAGCGGTTTCAG  |
| chr12 | 78400833  | 78400872  | NAV3_4927   | - | GTGACCTATGCACCAGACGTTTCTTCTAGCTGCTGTTGTCTTGGCTGCCCTTAGGGATCAGATCGGAAGAGCGGTTTCAG   |
| chr1  | 120457879 | 120457918 | NOTCH2_4928 | - | GTGACCTATGCACCAGACGTCTCCAGTGTAGAGACATAACTGACTTTTTGTAATGCTGCTAGATCGGAAGAGCGGTTTCAG  |
| chr1  | 120460238 | 120460277 | NOTCH2_4929 | - | GTGACCTATGCACCAGACGTTGGGCTCTGAGTCTGAGAGGCTCATAGCAGTGCCTCAGTAGATCGGAAGAGCGGTTTCAG   |
| chr1  | 120460979 | 120461018 | NOTCH2_4930 | - | GTGACCTATGCACCAGACGTAAAGCAGGATTTGGATTCTTAACTGCAAGCATGCCTCTAGATCGGAAGAGCGGTTTCAG    |



|       |           |           |               |   |                                                                                      |
|-------|-----------|-----------|---------------|---|--------------------------------------------------------------------------------------|
| chr5  | 176721597 | 176721636 | NSD1_4989     | - | GTGACCTATGCACCAGACGTTCTCAGGAGGTGGGAGTCTCTGGACAAAGAGGCATGGGGAGATCGGAAGAGCGGTTTCAG     |
| chr5  | 176722004 | 176722043 | NSD1_4990     | - | GTGACCTATGCACCAGACGTTCTTCTGAGGCCTGAGTTGTTGGCTCATATAAAAAGGCCAGATCGGAAGAGCGGTTTCAG     |
| chr5  | 176637014 | 176637053 | NSD1_4991     | - | GTGACCTATGCACCAGACGTAAGTTTCATTAGAGGCCTGCGTATCAGATATATCCCCAGAGAGATCGGAAGAGCGGTTTCAG   |
| chr5  | 176637441 | 176637480 | NSD1_4992     | - | GTGACCTATGCACCAGACGTTGTTTGGCAGCAAACCTAGAATACTTTATCTTTTCATTAGATCGGAAGAGCGGTTTCAG      |
| chr5  | 176637868 | 176637907 | NSD1_4993     | - | GTGACCTATGCACCAGACGTAGACCATCCACTTTCCCACCTTTAGAAATCGCTGGCCAAGAGATCGGAAGAGCGGTTTCAG    |
| chr5  | 176638295 | 176638334 | NSD1_4994     | - | GTGACCTATGCACCAGACGTAGGATTGGCGAGTTCTGAGTGCCATCTCCCTTTTTCTCTAGATCGGAAGAGCGGTTTCAG     |
| chr5  | 176638722 | 176638761 | NSD1_4995     | - | GTGACCTATGCACCAGACGTTACCAGGATCAGATTGCTTAACTTGGCTATCGAAATGCACAGATCGGAAGAGCGGTTTCAG    |
| chr11 | 117023114 | 117023153 | PAFAH1B2_4996 | - | GTGACCTATGCACCAGACGTAGAAAAAACGTCTATGTCATGTTTCATTTGTTAACAGGAAAGATCGGAAGAGCGGTTTCAG    |
| chr11 | 117031811 | 117031850 | PAFAH1B2_4997 | - | GTGACCTATGCACCAGACGTAAAAACTTGATTAGTGTACCTAAAACCTAGGGGAAAGTTTAGATCGGAAGAGCGGTTTCAG    |
| chr11 | 117034436 | 117034475 | PAFAH1B2_4998 | - | GTGACCTATGCACCAGACGTAGAAAAAAGGGGGGAAAGGAGAAGATAAATACCCAGGAACAGATCGGAAGAGCGGTTTCAG    |
| chr11 | 117038087 | 117038126 | PAFAH1B2_4999 | - | GTGACCTATGCACCAGACGTGTTGGAAAACATTAATTAGAAAGATTCACTTATTTTTCTCTAGATCGGAAGAGCGGTTTCAG   |
| chr20 | 9520059   | 9520098   | PAK7_5000     | - | GTGACCTATGCACCAGACGTCGTGTAGGTGGCAAAGCTAGATGAGGCATGAGAATAATTAGATCGGAAGAGCGGTTTCAG     |
| chr20 | 9523183   | 9523222   | PAK7_5001     | - | GTGACCTATGCACCAGACGTGACAGCTGTTGCTAAAGTTGCTAAAGTTTGGATTTTTGATTTCAGATCGGAAGAGCGGTTTCAG |
| chr20 | 9524966   | 9525005   | PAK7_5002     | - | GTGACCTATGCACCAGACGTACAGTCATAGGCGTGGCAGGACTGGGGACAGGCTCAGGGAGATCGGAAGAGCGGTTTCAG     |
| chr20 | 9538205   | 9538244   | PAK7_5003     | - | GTGACCTATGCACCAGACGTGATGTTTGGCCCGTTCGTAGTTTTTCTTGTCACTCTGCTAGATCGGAAGAGCGGTTTCAG     |
| chr20 | 9543488   | 9543527   | PAK7_5004     | - | GTGACCTATGCACCAGACGTTTATTATCCAGAGAATTCAGAGTGCCTTCTTATCTCTCCAGATCGGAAGAGCGGTTTCAG     |
| chr20 | 9546490   | 9546529   | PAK7_5005     | - | GTGACCTATGCACCAGACGTTGTTGGGTCATCCTTTCTCTCTGTTGAACATTTATTTTTCAGATCGGAAGAGCGGTTTCAG    |
| chr20 | 9560742   | 9560781   | PAK7_5006     | - | GTGACCTATGCACCAGACGTCTACCTCCTTTCCCTCAGTGTGCTGCAAAAACCTCCACAGGGAGATCGGAAGAGCGGTTTCAG  |
| chr20 | 9624723   | 9624762   | PAK7_5007     | - | GTGACCTATGCACCAGACGTGGCTCCATCTTTGGCTGGGCTTAAAGAATCATGCTCTTATTAGATCGGAAGAGCGGTTTCAG   |
| chr20 | 9561135   | 9561174   | PAK7_5008     | - | GTGACCTATGCACCAGACGTTGGACTCACTGAGCAAACCAAGTGAATACAGTGACCTCAAAGATCGGAAGAGCGGTTTCAG    |
| chr14 | 20811751  | 20811790  | PARP2_5009    | - | GTGACCTATGCACCAGACGTGCTGACGTCATCAACCCGCTCCAAGGAATCGCGGGCCAAGATCGGAAGAGCGGTTTCAG      |
| chr14 | 20813041  | 20813080  | PARP2_5010    | - | GTGACCTATGCACCAGACGTTGGAAATTAGCAAAAGAAATGAGTACACACCCGAATACGTTAGATCGGAAGAGCGGTTTCAG   |
| chr14 | 20813503  | 20813542  | PARP2_5011    | - | GTGACCTATGCACCAGACGTACAGATAGGTACTATTTATGGGAATCAAAAACAGCTGTTAGATCGGAAGAGCGGTTTCAG     |
| chr14 | 20814972  | 20815011  | PARP2_5012    | - | GTGACCTATGCACCAGACGTGAGAGAGGAAAAAACAATGATGATAGTTGTTTCAGCCCTGAGATCGGAAGAGCGGTTTCAG    |
| chr14 | 20818635  | 20818674  | PARP2_5013    | - | GTGACCTATGCACCAGACGTTGAAAACAAAAAACAAGGAGTTTTGCAAAATGGAAAAGATCGGAAGAGCGGTTTCAG        |
| chr14 | 20819156  | 20819195  | PARP2_5014    | - | GTGACCTATGCACCAGACGTAATGCCACACATAAGATAGTTCCCTAAGAGTACAGGCCAAAGATCGGAAGAGCGGTTTCAG    |
| chr14 | 20820354  | 20820393  | PARP2_5015    | - | GTGACCTATGCACCAGACGTCAAGGTGTAAGAAAACTTTACAAATAAAGGTCCTACTATGAAGATCGGAAGAGCGGTTTCAG   |
| chr14 | 20822918  | 20822957  | PARP2_5016    | - | GTGACCTATGCACCAGACGTACCAGAGATCAGACTCCAACCTAGGATCCCCTCTAGTGAAGATCGGAAGAGCGGTTTCAG     |
| chr14 | 20823861  | 20823900  | PARP2_5017    | - | GTGACCTATGCACCAGACGTAGATATAACCATAATGAGCTTTCTGACATGTGGCTAAAAGATCGGAAGAGCGGTTTCAG      |
| chr14 | 20824006  | 20824045  | PARP2_5018    | - | GTGACCTATGCACCAGACGTGAGATATAGAATCAATGTCAGGAGACACTGGTATAAGGGAAGATCGGAAGAGCGGTTTCAG    |
| chr14 | 20824416  | 20824455  | PARP2_5019    | - | GTGACCTATGCACCAGACGTTAAGACAAAAAGGCTGATGTAGACTCTACAAGAGACTGAGAGATCGGAAGAGCGGTTTCAG    |
| chr14 | 20824699  | 20824738  | PARP2_5020    | - | GTGACCTATGCACCAGACGTGCCAATATTATTGTACTCTGTTGTTCTGCACAGATAGGCCAGATCGGAAGAGCGGTTTCAG    |
| chr14 | 20825160  | 20825199  | PARP2_5021    | - | GTGACCTATGCACCAGACGTTACATGAATACCAAGGTCAGCTTTCTAACCCACTGTGTTAGATCGGAAGAGCGGTTTCAG     |
| chr14 | 20825505  | 20825544  | PARP2_5022    | - | GTGACCTATGCACCAGACGTAAAAACCTTTGAAATCCCATCTACTAAGAATTAGATGAGATCGGAAGAGCGGTTTCAG       |
| chr14 | 20825747  | 20825786  | PARP2_5023    | - | GTGACCTATGCACCAGACGTGAAAAAAAGTTGTGTCAACATCACTGCTCTGGTTCAAGAGCTAGATCGGAAGAGCGGTTTCAG  |
| chr17 | 26881188  | 26881227  | PIGS_5024     | - | GTGACCTATGCACCAGACGTACCTCCATAGGAAGCCTTCTTCTTGGCCAAGGTTGGCGGAGATCGGAAGAGCGGTTTCAG     |
| chr17 | 26881819  | 26881858  | PIGS_5025     | - | GTGACCTATGCACCAGACGTAGGGGATGGATTCTGCAGCTTGGGACTGGAGTAGCCAGAGAGATCGGAAGAGCGGTTTCAG    |
| chr17 | 26883134  | 26883173  | PIGS_5026     | - | GTGACCTATGCACCAGACGTGGATGATCCACTTTGGGACATAGTCTCCTTGGCTGTAGAGAGATCGGAAGAGCGGTTTCAG    |
| chr17 | 26883795  | 26883834  | PIGS_5027     | - | GTGACCTATGCACCAGACGTCACTACGACAGCCCCAGAGCCCATGCTTCTGGGACAGGCAAGATCGGAAGAGCGGTTTCAG    |
| chr17 | 26885444  | 26885483  | PIGS_5028     | - | GTGACCTATGCACCAGACGTAAGGATGAGGGCTTTCTTTCTGCCAGGCTAGGGGAAAGATCGGAAGAGCGGTTTCAG        |
| chr17 | 26887017  | 26887056  | PIGS_5029     | - | GTGACCTATGCACCAGACGTGAGCAAGTTGAGGAGTCCTTTTCAATGTCTATACATATTAGATCGGAAGAGCGGTTTCAG     |
| chr17 | 26888390  | 26888429  | PIGS_5030     | - | GTGACCTATGCACCAGACGTAGGCTCTGCCACATGAAGGGAGAGGAAATGAATTACATGGAGATCGGAAGAGCGGTTTCAG    |
| chr17 | 26890399  | 26890438  | PIGS_5031     | - | GTGACCTATGCACCAGACGTAGAGAGGCTGCGACTTTGCTTTCTGCCAGGCTAGGGGAAAGATCGGAAGAGCGGTTTCAG     |
| chr17 | 26890786  | 26890825  | PIGS_5032     | - | GTGACCTATGCACCAGACGTGGATGAGCACACCAATTTAATGTGAAGCCCTCTTTTTCTAGATCGGAAGAGCGGTTTCAG     |
| chr17 | 26897820  | 26897859  | PIGS_5033     | - | GTGACCTATGCACCAGACGTGGGGATCAGGGCTGCTTTTCGCTCTGAGCTCAGTTCAAGAGATCGGAAGAGCGGTTTCAG     |
| chr17 | 26898017  | 26898056  | PIGS_5034     | - | GTGACCTATGCACCAGACGTTGTGCGGAGGGTGTGGCGGACAGCCGCCCCGCAAGGTGGAGATCGGAAGAGCGGTTTCAG     |
| chr17 | 26898431  | 26898470  | PIGS_5035     | - | GTGACCTATGCACCAGACGTCTTCGGGTGGGGGCGCTGCAGCTAGCTGATGGCAAGGGAGAGATCGGAAGAGCGGTTTCAG    |
| chr12 | 133201233 | 133201272 | POLE_5036     | - | GTGACCTATGCACCAGACGTGCCCGGGTGCCTCTGCGTCCGTGCCAGGCCCTCTGATGCAGATCGGAAGAGCGGTTTCAG     |
| chr12 | 133201441 | 133201480 | POLE_5037     | - | GTGACCTATGCACCAGACGTCCCTCATCTGCTCCTGGCTCAGCCTGGCCTCCTTGGCCTCCTAGATCGGAAGAGCGGTTTCAG  |
| chr12 | 133202181 | 133202220 | POLE_5038     | - | GTGACCTATGCACCAGACGTACGCGCCTGCCCCGTGTCGCTGGAGTCCACAGGGGGGTAGATCGGAAGAGCGGTTTCAG      |
| chr12 | 133202653 | 133202692 | POLE_5039     | - | GTGACCTATGCACCAGACGTGCTCCAGCGGCCCTCACTGTGGAGCAGAACATCCGAGGAGATCGGAAGAGCGGTTTCAG      |
| chr12 | 133208851 | 133208890 | POLE_5040     | - | GTGACCTATGCACCAGACGTACGCTGCGTGTGAGGAGAGGACACTAACGTACATGTGTAAGATCGGAAGAGCGGTTTCAG     |
| chr12 | 133209200 | 133209239 | POLE_5041     | - | GTGACCTATGCACCAGACGTTTTTGTCTTTGAGGCCACTGCCATGTGCCAGTGACCTAAAAGATCGGAAGAGCGGTTTCAG    |
| chr12 | 133210722 | 133210761 | POLE_5042     | - | GTGACCTATGCACCAGACGTAGCCAGGGCTGCGCAGCCCCACTGAAGGGACTCATGGTAGATCGGAAGAGCGGTTTCAG      |
| chr12 | 133212428 | 133212467 | POLE_5043     | - | GTGACCTATGCACCAGACGTTGCAGTGTGCCACCCGAGCCAGCTTTGGGGGTCCGCTTCAAGATCGGAAGAGCGGTTTCAG    |
| chr12 | 133214550 | 133214589 | POLE_5044     | - | GTGACCTATGCACCAGACGTCGGTCTGGTGACGACGACTGTGGCTTTGAGAGGGATGAGATCGGAAGAGCGGTTTCAG       |
| chr12 | 133215661 | 133215700 | POLE_5045     | - | GTGACCTATGCACCAGACGTCCTCCTCGTGGCTGCTCCAGCTGCGCTGAGATCGGAAGAGCGGTTTCAG                |
| chr12 | 133218183 | 133218222 | POLE_5046     | - | GTGACCTATGCACCAGACGTCTCTGGGAAGGAGTGTACTAATAGAAGGGTCTTATCTTAGATCGGAAGAGCGGTTTCAG      |

|       |           |           |               |   |                                                                                             |
|-------|-----------|-----------|---------------|---|---------------------------------------------------------------------------------------------|
| chr12 | 133218713 | 133218752 | POLE_5047     | - | GTGACCTATGCACCAGACGTGGGAGGACGAGGCCCATGAGACCTGGCTGGTGTCTTCTGCCAGATCGGAAGAGCGGTTTCAG          |
| chr12 | 133219042 | 133219081 | POLE_5048     | - | GTGACCTATGCACCAGACGTTACTGTCTGTGGGCCAGTGGTCCCCAGGCAGAGCCGGCAGATCGGAAGAGCGGTTTCAG             |
| chr12 | 133219356 | 133219395 | POLE_5049     | - | GTGACCTATGCACCAGACGTTTGGGGTCTTGTCTGTGTGAGCCCCATCTTCTTTGAGGCTGAGATCGGAAGAGCGGTTTCAG          |
| chr12 | 133219760 | 133219799 | POLE_5050     | - | GTGACCTATGCACCAGACGTGGCCCTCCATGGCAGCACATTGGCTGGGGCAGGGTTTGGGAGATCGGAAGAGCGGTTTCAG           |
| chr12 | 133219943 | 133219982 | POLE_5051     | - | GTGACCTATGCACCAGACGTCACCAGCCGCCATCATGTGCCTGCCTCCCACACATCTGGAGATCGGAAGAGCGGTTTCAG            |
| chr12 | 133220373 | 133220412 | POLE_5052     | - | GTGACCTATGCACCAGACGTAGCCCTCGACTGAACGGGGAGGCTCCAGCAGGGTGAGATCGGAAGAGCGGTTTCAG                |
| chr12 | 133225465 | 133225504 | POLE_5053     | - | GTGACCTATGCACCAGACGTTCCGCTGGTGTCTGTGGCAGCTATGGCAGCCTGAGGTGAGATCGGAAGAGCGGTTTCAG             |
| chr12 | 133225842 | 133225881 | POLE_5054     | - | GTGACCTATGCACCAGACGTTGATCCAAGGGGAGGGCAGTGGCTCTGCTGATGGCCCAGGAGATCGGAAGAGCGGTTTCAG           |
| chr12 | 133226213 | 133226252 | POLE_5055     | - | GTGACCTATGCACCAGACGTCAGCTGTGATACTGTCTGTCTGTGAGGGTCTGCACAGCCAGATCGGAAGAGCGGTTTCAG            |
| chr12 | 133233672 | 133233711 | POLE_5056     | - | GTGACCTATGCACCAGACGTGGCCCCAAGGCTGGGCTGGGCAGGATCCTTGTGACACACAAGATCGGAAGAGCGGTTTCAG           |
| chr12 | 133233885 | 133233924 | POLE_5057     | - | GTGACCTATGCACCAGACGTGGTCACTGAGTGGCAGCGGGCTGTGGGGCTAAAACTGTGCAGTTAGATCGGAAGAGCGGTTTCAG       |
| chr12 | 133234404 | 133234443 | POLE_5058     | - | GTGACCTATGCACCAGACGTGTTCGCTTCTACTCTTAAAGTTTACAAGGAAAGCTAGAGATCGGAAGAGCGGTTTCAG              |
| chr12 | 133235831 | 133235870 | POLE_5059     | - | GTGACCTATGCACCAGACGTCCCCATCACGGAGAGGTTGAGGGCTCCTCCCATCACGGACAGATCGGAAGAGCGGTTTCAG           |
| chr12 | 133237505 | 133237544 | POLE_5060     | - | GTGACCTATGCACCAGACGTACCCTCCACCCTCACCTGCTCTGAGGGATGAAGGATGAAGAGATCGGAAGAGCGGTTTCAG           |
| chr12 | 133238063 | 133238102 | POLE_5061     | - | GTGACCTATGCACCAGACGTCATAGCTTTTGTGCTTTAGAAAGGACATGGATTGAGATAGAGATCGGAAGAGCGGTTTCAG           |
| chr12 | 133240540 | 133240579 | POLE_5062     | - | GTGACCTATGCACCAGACGTGGCCTCTGGTCTGAGACTCTGGCTGGCCTGGCCTCAGTGAGATCGGAAGAGCGGTTTCAG            |
| chr12 | 133240906 | 133240945 | POLE_5063     | - | GTGACCTATGCACCAGACGTAAGGGGAGCCGTGGGGCTGGGAGCAGGCTCTGGGGCAAGAGATCGGAAGAGCGGTTTCAG            |
| chr12 | 133241838 | 133241877 | POLE_5064     | - | GTGACCTATGCACCAGACGTCCGGGCCGGGAGAGGCTTATGGAGGAATGGATGAGTCCAGATCGGAAGAGCGGTTTCAG             |
| chr12 | 133244039 | 133244078 | POLE_5065     | - | GTGACCTATGCACCAGACGTAGGGGCTGCAAGCTTTGGCCTCTGTGAGGGCAGTTTCAGTATAGATCGGAAGAGCGGTTTCAG         |
| chr12 | 133244892 | 133244931 | POLE_5066     | - | GTGACCTATGCACCAGACGTGGGCATGGTCAAGGCTGTAAAGATGTGGCTCCTGCTCCCAAGATCGGAAGAGCGGTTTCAG           |
| chr12 | 133245171 | 133245210 | POLE_5067     | - | GTGACCTATGCACCAGACGTGCCGCTGGGTGGGCACCTCGGTGGGAAACGGGTGGGTGAGAGATCGGAAGAGCGGTTTCAG           |
| chr12 | 133245347 | 133245386 | POLE_5068     | - | GTGACCTATGCACCAGACGTACTTCCCGTGTCAAGTCTGGAGCTCTCTCTGCCAGCCCTAGATCGGAAGAGCGGTTTCAG            |
| chr12 | 133248751 | 133248790 | POLE_5069     | - | GTGACCTATGCACCAGACGTGGGAGCGAGGAAGGCCAGTCTGTGTTGGCGCTTCTTCAGATCGGAAGAGCGGTTTCAG              |
| chr12 | 133249163 | 133249202 | POLE_5070     | - | GTGACCTATGCACCAGACGTTCCTGGGTTCCAGATTCTCCCACTTTGTGCTGTGCTAAAGATCGGAAGAGCGGTTTCAG             |
| chr12 | 133249700 | 133249739 | POLE_5071     | - | GTGACCTATGCACCAGACGTTCTGTCTGTGGCACCCTGGCCTCCTCAGCCCTTCCCCAGATCGGAAGAGCGGTTTCAG              |
| chr12 | 133250111 | 133250150 | POLE_5072     | - | GTGACCTATGCACCAGACGTCACATCCCGCTGCCCTGCTGCCGTGTGCACGCATCCAGAGATCGGAAGAGCGGTTTCAG             |
| chr12 | 133251934 | 133251973 | POLE_5073     | - | GTGACCTATGCACCAGACGTCAGAGCAGCATGGCTCCTCACTGCTGCCGTGAGCGAGATAGATCGGAAGAGCGGTTTCAG            |
| chr12 | 133252271 | 133252310 | POLE_5074     | - | GTGACCTATGCACCAGACGTGCTTCTATGAGTAACTGGGACGATTTGAGAGGGAGGAGATCGGAAGAGCGGTTTCAG               |
| chr12 | 133252630 | 133252669 | POLE_5075     | - | GTGACCTATGCACCAGACGTACCTTGGAACTACCCGCTATTGTGGGAAGAACGGACAGATCGGAAGAGCGGTTTCAG               |
| chr12 | 133253082 | 133253121 | POLE_5076     | - | GTGACCTATGCACCAGACGTTCCCTGGGTTTCCATAGACTCAGGTCAGACGACCTGTGTGCTATTCTGTGAGATCGGAAGAGCGGTTTCAG |
| chr12 | 133253899 | 133253938 | POLE_5077     | - | GTGACCTATGCACCAGACGTTGTGTTACCTTCATCCTAAAATTTCCAGTTTTCTGGAGAGATCGGAAGAGCGGTTTCAG             |
| chr12 | 133254114 | 133254153 | POLE_5078     | - | GTGACCTATGCACCAGACGTCAGGGTTGGGTGCTGCTCACATGAATTTCCTAACAGCCAAGATCGGAAGAGCGGTTTCAG            |
| chr12 | 133256033 | 133256072 | POLE_5079     | - | GTGACCTATGCACCAGACGTGCTTGTGAGCAAAGCATCAGCGGTTTCAGAACGACAAGATAGATCGGAAGAGCGGTTTCAG           |
| chr12 | 133256490 | 133256529 | POLE_5080     | - | GTGACCTATGCACCAGACGTCACGACTTCCAGGGGTAATGAGGCGCAGATCTACATTAGATCGGAAGAGCGGTTTCAG              |
| chr12 | 133256714 | 133256753 | POLE_5081     | - | GTGACCTATGCACCAGACGTTTCCATAGACTCAGGTCAGACGACCTGTGTGCTATTCTGTGAGATCGGAAGAGCGGTTTCAG          |
| chr12 | 133257143 | 133257182 | POLE_5082     | - | GTGACCTATGCACCAGACGTGACTGCGACAAGCTAAAACCCACTTTTATGGGTGTTTCATGAGATCGGAAGAGCGGTTTCAG          |
| chr12 | 133257674 | 133257713 | POLE_5083     | - | GTGACCTATGCACCAGACGTGGTCTTCTCCACCCAGGAATATGGCTGCAACCCTTCTGAGATCGGAAGAGCGGTTTCAG             |
| chr12 | 133263790 | 133263829 | POLE_5084     | - | GTGACCTATGCACCAGACGTCCCTCCTGAGGCTCTCGGGCCGGCCCTCCGGAGGGTGCCAAGATCGGAAGAGCGGTTTCAG           |
| chr19 | 45883398  | 45883437  | PPP1R13L_5085 | - | GTGACCTATGCACCAGACGTGGAGGTTTCTGAGGCTGACAGAAACAAGCATTCTGCTTAGATCGGAAGAGCGGTTTCAG             |
| chr19 | 45885735  | 45885774  | PPP1R13L_5086 | - | GTGACCTATGCACCAGACGTGGGAGAAGTCAATGGGGACCTCCCGACAGTTGGGGTTGGGAGATCGGAAGAGCGGTTTCAG           |
| chr19 | 45888770  | 45888809  | PPP1R13L_5087 | - | GTGACCTATGCACCAGACGTGGGCTGCTGGCCCTGGGTACCTGCGGGGTGCGCAGGAGCAGATCGGAAGAGCGGTTTCAG            |
| chr19 | 45889032  | 45889071  | PPP1R13L_5088 | - | GTGACCTATGCACCAGACGTACCCGCGCGGTGGGCTGGGTCCCGCTGGGCGGACGCGCAAGATCGGAAGAGCGGTTTCAG            |
| chr19 | 45889257  | 45889296  | PPP1R13L_5089 | - | GTGACCTATGCACCAGACGTCAGAGCGGAGGTGGGCACGGCGGGGATCGCAGATGCCAGATCGGAAGAGCGGTTTCAG              |
| chr19 | 45895088  | 45895127  | PPP1R13L_5090 | - | GTGACCTATGCACCAGACGTCAGGAGGAAACCGGGGTATGTTGCTACATGAATCCAGGAAGATCGGAAGAGCGGTTTCAG            |
| chr19 | 45898684  | 45898683  | PPP1R13L_5091 | - | GTGACCTATGCACCAGACGTAATGAGGGCCCTAGAGGACTGGGTGAAGGGAGGACAAATGAGATCGGAAGAGCGGTTTCAG           |
| chr19 | 45899376  | 45899415  | PPP1R13L_5092 | - | GTGACCTATGCACCAGACGTGACGCTGGGAGGAGGAGCTGGGAGGTCGAGAGTCCGAGATCGGAAGAGCGGTTTCAG               |
| chr19 | 45899546  | 45899585  | PPP1R13L_5093 | - | GTGACCTATGCACCAGACGTGAGGCCCCGGGAATGGAGGACCCGAGGAGAGGCAGCCCCAGATCGGAAGAGCGGTTTCAG            |
| chr19 | 45899753  | 45899792  | PPP1R13L_5094 | - | GTGACCTATGCACCAGACGTGGGCCCTCGCGGGCCTTTGACTCGCGGGGTCAAAGCGGAGATCGGAAGAGCGGTTTCAG             |
| chr19 | 45901213  | 45901252  | PPP1R13L_5095 | - | GTGACCTATGCACCAGACGTTTCCACCTTGATCTCAAAGCCAGCCTCTCGCCACAGTCAGATCGGAAGAGCGGTTTCAG             |
| chr19 | 45901472  | 45901511  | PPP1R13L_5096 | - | GTGACCTATGCACCAGACGTGATGGGGGCGGGCTGGCGAGGCGGGGACCTCGGCAGCGGAGATCGGAAGAGCGGTTTCAG            |
| chr19 | 45900010  | 45900049  | PPP1R13L_5097 | - | GTGACCTATGCACCAGACGTGCGCCCTCCCGCCCGGCGCCAGCCCGCTCCGCCAGCAGATCGGAAGAGCGGTTTCAG               |
| chr8  | 30643701  | 30643740  | PPP2CB_5098   | - | GTGACCTATGCACCAGACGTGGAAACCTGCTTTGTATGTGGAAGTATACCTGCTTTTTAGATCGGAAGAGCGGTTTCAG             |
| chr8  | 30648663  | 30648702  | PPP2CB_5099   | - | GTGACCTATGCACCAGACGTGAAATTTAATTGTATATACTTTCAGAAGGAAATTTAAGATCGGAAGAGCGGTTTCAG               |
| chr8  | 30651383  | 30651422  | PPP2CB_5100   | - | GTGACCTATGCACCAGACGTTCTGACAGAATGATCTTTATTTAGATAGTATATACTTAGATCGGAAGAGCGGTTTCAG              |
| chr8  | 30651658  | 30651697  | PPP2CB_5101   | - | GTGACCTATGCACCAGACGTTTAAAAAAGAGAAGAAAGAAAAGAAAATATAACCACAAGATCGGAAGAGCGGTTTCAG              |
| chr8  | 30655047  | 30655086  | PPP2CB_5102   | - | GTGACCTATGCACCAGACGTGTGTCTTACATCTGGGAGGAGGTAATGGAAGCAGAGAAGATCGGAAGAGCGGTTTCAG              |
| chr8  | 30657012  | 30657051  | PPP2CB_5103   | - | GTGACCTATGCACCAGACGTTGAAATTTTTTTTCAAGATTTAAACCAGGCAAAAAGATCGGAAGAGCGGTTTCAG                 |
| chr8  | 30669786  | 30669825  | PPP2CB_5104   | - | GTGACCTATGCACCAGACGTTGGCGGGGCGAGTGGCGGAGCGGGGCTGGGACGGCCGAGATCGGAAGAGCGGTTTCAG              |



|      |           |           |              |   |                                                                                       |
|------|-----------|-----------|--------------|---|---------------------------------------------------------------------------------------|
| chr5 | 145969460 | 145969499 | PPP2R2B_5105 | - | GTGACCTATGCACCAGACGTTATTACTTAATAATCTCACATACTGAATACTAGTCAAACAAGATCGGAAGAGCGGTTCCAG     |
| chr5 | 145972484 | 145972523 | PPP2R2B_5106 | - | GTGACCTATGCACCAGACGCTCTGTGGCTGAAGAACCTTCCAAGATTGTCTTGAAGAGAGATCGGAAGAGCGGTTCCAG       |
| chr5 | 145979804 | 145979843 | PPP2R2B_5107 | - | GTGACCTATGCACCAGACGTCACAGGCACCCATAGGTATATTGAACATTCCCTTCATGAGCAGATCGGAAGAGCGGTTCCAG    |
| chr5 | 146017764 | 146017803 | PPP2R2B_5108 | - | GTGACCTATGCACCAGACGCTACTGAAGGGAGGTGGGGGGCATGCCACTGGCCCCAATGTAGATCGGAAGAGCGGTTCCAG     |
| chr5 | 146030060 | 146030099 | PPP2R2B_5109 | - | GTGACCTATGCACCAGACGTTTTGTGATCAAGAATCAACTGCCCTGAATTAAGAGTATTCAGATCGGAAGAGCGGTTCCAG     |
| chr5 | 146070641 | 146070680 | PPP2R2B_5110 | - | GTGACCTATGCACCAGACGTACAGCTGCCCTGCCACCACAGTCAGGGGCAGGTCTCCTAAGATCGGAAGAGCGGTTCCAG      |
| chr5 | 146077492 | 146077531 | PPP2R2B_5111 | - | GTGACCTATGCACCAGACGTTTTCTGTGTTGGTATTTTCCAGATACAGTCGGGCAAACATAGATCGGAAGAGCGGTTCCAG     |
| chr5 | 146080558 | 146080597 | PPP2R2B_5112 | - | GTGACCTATGCACCAGACGTGTGAATGCAAAATGCCATTCTTCACTTTTTAAAGGAGAGATCGGAAGAGCGGTTCCAG        |
| chr5 | 146236012 | 146236051 | PPP2R2B_5113 | - | GTGACCTATGCACCAGACGTTATTATTATACCTACTCTTCTTGATAAAGTAGCAGTATAAGATCGGAAGAGCGGTTCCAG      |
| chr5 | 146257515 | 146257554 | PPP2R2B_5114 | - | GTGACCTATGCACCAGACGTCCCCGCCGATTCCGCCGTTGGGGCCGGCGCAAGTTGCGAGATCGGAAGAGCGGTTCCAG       |
| chr5 | 146435178 | 146435217 | PPP2R2B_5115 | - | GTGACCTATGCACCAGACGTGAGAGGGAGAGTGTCTGGTGGGTGGGAAAAGTGGGCTGGAGATCGGAAGAGCGGTTCCAG      |
| chr1 | 45288037  | 45288076  | PTCH2_5116   | - | GTGACCTATGCACCAGACGTGAAGCACAGACCATGTGTGGGGCGTGTGGGTCACCTGGAGATCGGAAGAGCGGTTCCAG       |
| chr1 | 45288691  | 45288730  | PTCH2_5117   | - | GTGACCTATGCACCAGACGTCCTCGGCACCATCCCTCTACTCCCAGCCCAAGGGACGGGGAGATCGGAAGAGCGGTTCCAG     |
| chr1 | 45288865  | 45288904  | PTCH2_5118   | - | GTGACCTATGCACCAGACGTCCTCGGGCAGGGAGGCAGGGCTCAGGACAGGCCTGGGCTGAGATCGGAAGAGCGGTTCCAG     |
| chr1 | 45292110  | 45292149  | PTCH2_5119   | - | GTGACCTATGCACCAGACGTGCAGGAGTGGGGACAGAGACACCCCACCCTTCCCTGCCCAAGATCGGAAGAGCGGTTCCAG     |
| chr1 | 45292524  | 45292563  | PTCH2_5120   | - | GTGACCTATGCACCAGACGTGGGGGAGCTCGGCAAGAGCCTCACCTCGCCACACAAGCAGATCGGAAGAGCGGTTCCAG       |
| chr1 | 45292789  | 45292828  | PTCH2_5121   | - | GTGACCTATGCACCAGACGTGGCTGGAGGGTCCACTAGTACAGGGGCTGCAGGCCTCCTAGATCGGAAGAGCGGTTCCAG      |
| chr1 | 45293024  | 45293063  | PTCH2_5122   | - | GTGACCTATGCACCAGACGTGAGGACGGGCGAGAGGTGTCTGCAGGGAGAAACGCCAGATCGGAAGAGCGGTTCCAG         |
| chr1 | 45293465  | 45293504  | PTCH2_5123   | - | GTGACCTATGCACCAGACGTGCAGAGCAGGGCAGAGACTTAGCATCTCTGGGCCAGAAAGATCGGAAGAGCGGTTCCAG       |
| chr1 | 45293918  | 45293957  | PTCH2_5124   | - | GTGACCTATGCACCAGACGTGCCCCAGCCCTTCTCCCTGGTACCACGCCAGCCTGTCAGATCGGAAGAGCGGTTCCAG        |
| chr1 | 45294128  | 45294167  | PTCH2_5125   | - | GTGACCTATGCACCAGACGTTACACGGGGCAGCTCAGGGTGGTGTGGGGCTGAGGCCAAGATCGGAAGAGCGGTTCCAG       |
| chr1 | 45294604  | 45294643  | PTCH2_5126   | - | GTGACCTATGCACCAGACGTGTCCCCAGGGCTCATCTGAGGCAGCTCAGCTTACTGGTTAGATCGGAAGAGCGGTTCCAG      |
| chr1 | 45294779  | 45294818  | PTCH2_5127   | - | GTGACCTATGCACCAGACGTACTGCAGGGCAGACTCAGTCCAGTACCAGGCTTCCAGGAGATCGGAAGAGCGGTTCCAG       |
| chr1 | 45295024  | 45295063  | PTCH2_5128   | - | GTGACCTATGCACCAGACGTCACCTGCACCTTGCCCCACCCTCCAAACCAGTCCAGATCGGAAGAGCGGTTCCAG           |
| chr1 | 45295236  | 45295275  | PTCH2_5129   | - | GTGACCTATGCACCAGACGTACAAGGACAAGGGGGTGCCCTGAGGCCATTCCCTCCTCCAGATCGGAAGAGCGGTTCCAG      |
| chr1 | 45295531  | 45295570  | PTCH2_5130   | - | GTGACCTATGCACCAGACGTCTCTGGGAGTTGGTGAAGGGACTCTGTTTCATGAGAACCCAAGATCGGAAGAGCGGTTCCAG    |
| chr1 | 45296470  | 45296509  | PTCH2_5131   | - | GTGACCTATGCACCAGACGTACCAGGTCTGCCAGGGAAAGGCTGTTTTCTCCCTTCCAGATCGGAAGAGCGGTTCCAG        |
| chr1 | 45297328  | 45297367  | PTCH2_5132   | - | GTGACCTATGCACCAGACGTCTCCTGGGGCTGCTTCTATCCCGCTGGGGACTCTCCAGATCGGAAGAGCGGTTCCAG         |
| chr1 | 45297597  | 45297636  | PTCH2_5133   | - | GTGACCTATGCACCAGACGTTGAGAGGGAGTAGGGCAGCACTTTTCTGTAGCTGGGAAGATCGGAAGAGCGGTTCCAG        |
| chr1 | 45297774  | 45297813  | PTCH2_5134   | - | GTGACCTATGCACCAGACGCTGACGCCCTGAGCAGCTGGGGCCGAGGCCGCTGTGGGGAGATCGGAAGAGCGGTTCCAG       |
| chr1 | 45307469  | 45307508  | PTCH2_5135   | - | GTGACCTATGCACCAGACGTGACACTGGCCATAGCTGCTCAGGTATGGTGAAGCCCAAGACAGATCGGAAGAGCGGTTCCAG    |
| chr1 | 45308483  | 45308522  | PTCH2_5136   | - | GTGACCTATGCACCAGACGTGGGGAGCTGGAAGAAGGAAGAGAGCGGAGCCAGGTCTGTCAGATCGGAAGAGCGGTTCCAG     |
| chr8 | 141669515 | 141669554 | PTK2_5137    | - | GTGACCTATGCACCAGACGTGGAGCAGCTTGTACTACCTCTTTTTGAAGATGTTCTCTAGAGATCGGAAGAGCGGTTCCAG     |
| chr8 | 141674966 | 141675005 | PTK2_5138    | - | GTGACCTATGCACCAGACGTATCTCCCCCTTGACGCCCTGTGACAGCACTGGGCAGAGATCGGAAGAGCGGTTCCAG         |
| chr8 | 141678318 | 141678357 | PTK2_5139    | - | GTGACCTATGCACCAGACGTGTCAATTTTTGTACTGGCAAAATGTTCTTTGTTTCTGTAAGATCGGAAGAGCGGTTCCAG      |
| chr8 | 141684347 | 141684386 | PTK2_5140    | - | GTGACCTATGCACCAGACGTGAGCCTGTGACACCTTCTGCTTGCAGGATTTGTGGTGTAGATCGGAAGAGCGGTTCCAG       |
| chr8 | 141685509 | 141685548 | PTK2_5141    | - | GTGACCTATGCACCAGACGTAAGAATTGGGCGGAAAGAAGTTAGTTTAATTTGATGAAAAGATCGGAAGAGCGGTTCCAG      |
| chr8 | 141696681 | 141696720 | PTK2_5142    | - | GTGACCTATGCACCAGACGTGTTTTACAGCAGGATTTGATTTCCAGTCTCCTGTGCGTGGAGATCGGAAGAGCGGTTCCAG     |
| chr8 | 141710940 | 141710979 | PTK2_5143    | - | GTGACCTATGCACCAGACGTTTTCTGAAAGGCTTCTTTGACTTTTTAAGCCCTGTTAGAGTAGATCGGAAGAGCGGTTCCAG    |
| chr8 | 141712619 | 141712658 | PTK2_5144    | - | GTGACCTATGCACCAGACGTTGCTTTGGGCTTCACTTTGTAACCTATAAAGCATGGCAAGATCGGAAGAGCGGTTCCAG       |
| chr8 | 141716168 | 141716207 | PTK2_5145    | - | GTGACCTATGCACCAGACGTCATTACAGATAAATCTGTGTATTATTATTAGCCTAGATCGGAAGAGCGGTTCCAG           |
| chr8 | 141727647 | 141727686 | PTK2_5146    | - | GTGACCTATGCACCAGACGTTCCCCACCCCAACTTTGGGGTTACTCTTACTAACTTTCAAAGATCGGAAGAGCGGTTCCAG     |
| chr8 | 141745300 | 141745339 | PTK2_5147    | - | GTGACCTATGCACCAGACGTGCGGGAGAGAGGGCCTGGGGGTGGGGGCAGATTATGCTGCAGATCGGAAGAGCGGTTCCAG     |
| chr8 | 141749067 | 141749106 | PTK2_5148    | - | GTGACCTATGCACCAGACGTTTAAAAGTTTTGATTCTTTAAAATTTATATTTTCATATGTAGATCGGAAGAGCGGTTCCAG     |
| chr8 | 141753279 | 141753318 | PTK2_5149    | - | GTGACCTATGCACCAGACGTAGAGTAGTACTCAAGAATAAGGCTTGAATCTTAACTTAAAGTAAAGATCGGAAGAGCGGTTCCAG |
| chr8 | 141754701 | 141754740 | PTK2_5150    | - | GTGACCTATGCACCAGACGTGTCAATAAAGTGTAAAGTCCCTTCTGAAAAGTAGTGATCAGATCGGAAGAGCGGTTCCAG      |
| chr8 | 141756809 | 141756848 | PTK2_5151    | - | GTGACCTATGCACCAGACGTCCCCAAATCTTACCCTCTGGACTCAGCGTTTGATATCTTTAGATCGGAAGAGCGGTTCCAG     |
| chr8 | 141762281 | 141762320 | PTK2_5152    | - | GTGACCTATGCACCAGACGTAGAAATTTCTGTGGAATCCATTGACTTTCTATCTGTGAAGATCGGAAGAGCGGTTCCAG       |
| chr8 | 141771214 | 141771253 | PTK2_5153    | - | GTGACCTATGCACCAGACGTTAAGACTACCAAACAATAGACTAATTTTGACTATTTAAGAGATCGGAAGAGCGGTTCCAG      |
| chr8 | 141774283 | 141774322 | PTK2_5154    | - | GTGACCTATGCACCAGACGTTTCTGATTTTGTCTTGTCTCAGACTTGACAGATGCCTCCTAGATCGGAAGAGCGGTTCCAG     |
| chr8 | 141799523 | 141799562 | PTK2_5155    | - | GTGACCTATGCACCAGACGTTAGTAGACACTGAAAAGCACTCTCATGGGTAAGAAGATCGGAAGAGCGGTTCCAG           |
| chr8 | 141803403 | 141803442 | PTK2_5156    | - | GTGACCTATGCACCAGACGTTTTTTTTGTACTGTTTATTTGTTTTGTTTGGAAAGTTTAAAGATCGGAAGAGCGGTTCCAG     |
| chr8 | 141810508 | 141810547 | PTK2_5157    | - | GTGACCTATGCACCAGACGTGTTTTCTGAGCATTCCCAATTGCGCTTCTACCAAAATTTAAGATCGGAAGAGCGGTTCCAG     |
| chr8 | 141813592 | 141813631 | PTK2_5158    | - | GTGACCTATGCACCAGACGTGTACGTTTCATCATTAAAGGAAAATGGTAAATAGGGATGAGATCGGAAGAGCGGTTCCAG      |
| chr8 | 141828326 | 141828365 | PTK2_5159    | - | GTGACCTATGCACCAGACGTTCTGACCTTTCCGGAACTTGGCGTTACACAAAGAAGAATCAGATCGGAAGAGCGGTTCCAG     |
| chr8 | 141828929 | 141828968 | PTK2_5160    | - | GTGACCTATGCACCAGACGTGAATAGGGAAATAGTGGGTAGTTTATTACTTTTTTCAGATCGGAAGAGCGGTTCCAG         |
| chr8 | 141840521 | 141840560 | PTK2_5161    | - | GTGACCTATGCACCAGACGTTCTCCTTTATCATATAAATAAACAATAAGTATGCCAAGACATCGGAAGAGCGGTTCCAG       |
| chr8 | 141856309 | 141856348 | PTK2_5162    | - | GTGACCTATGCACCAGACGTTACTTACAATCTATACCTGAAATAATGCAGAACTAAATCAGATCGGAAGAGCGGTTCCAG      |

|       |           |           |              |   |                                                                                      |
|-------|-----------|-----------|--------------|---|--------------------------------------------------------------------------------------|
| chr8  | 141874361 | 141874400 | PTK2_5163    | - | GTGACCTATGCACCAGACGCTGCTTTTCATATACTTTTTGTTTGTTCCTTTGAATCCTAAGATCGGAAGAGCGGTTTCAG     |
| chr8  | 141889520 | 141889559 | PTK2_5164    | - | GTGACCTATGCACCAGACGTAACCTGCTTTGGTGTGATGCACACTTGATTTCTTTTCTTTAGATCGGAAGAGCGGTTTCAG    |
| chr8  | 141900592 | 141900631 | PTK2_5165    | - | GTGACCTATGCACCAGACGTTTTTCCATGAGACATCTTTAATGTTTTATTAGGTTAAAAATAGATCGGAAGAGCGGTTTCAG   |
| chr9  | 8317824   | 8317863   | PTPRD_5166   | - | GTGACCTATGCACCAGACGTCCTTCTGGATTTTTACTACAGGCCCTTCATATCCATGAGATCGGAAGAGCGGTTTCAG       |
| chr9  | 8319781   | 8319820   | PTPRD_5167   | - | GTGACCTATGCACCAGACGTCCTTTCGATTTTTTCCGATCTCAAGAGCCTACGTTTTGCTAAGATCGGAAGAGCGGTTTCAG   |
| chr9  | 8331532   | 8331571   | PTPRD_5168   | - | GTGACCTATGCACCAGACGTATTGTGAATAAAGCAGTGATAAGTGGTGGTGTTCCTTCAAGATCGGAAGAGCGGTTTCAG     |
| chr9  | 8338872   | 8338911   | PTPRD_5169   | - | GTGACCTATGCACCAGACGTACAGCTTCAACTTTAACCATTAGCTGAAAAGTAGCTAAGATCGGAAGAGCGGTTTCAG       |
| chr9  | 8340293   | 8340332   | PTPRD_5170   | - | GTGACCTATGCACCAGACGTGGCCCTTGTGTCTCTCCTCATAAGACATTTACTCTGTGGAAGATCGGAAGAGCGGTTTCAG    |
| chr9  | 8341040   | 8341079   | PTPRD_5171   | - | GTGACCTATGCACCAGACGTTTGTCTCCCTGACTATCCAAGCCTTGATATTTACATGTGAGATCGGAAGAGCGGTTTCAG     |
| chr9  | 8341643   | 8341682   | PTPRD_5172   | - | GTGACCTATGCACCAGACGTGGATGTGATGTGGTTATTCAGGAGCAAGTCATTCTGGGTAGATCGGAAGAGCGGTTTCAG     |
| chr9  | 8375886   | 8375925   | PTPRD_5173   | - | GTGACCTATGCACCAGACGTTTTGTTCACCTGCAGTCAGGAAACAGAAAAGCTAAATTGACAGATCGGAAGAGCGGTTTCAG   |
| chr9  | 8376557   | 8376596   | PTPRD_5174   | - | GTGACCTATGCACCAGACGTCATCTTTTTCTCCCTCCCTTCTCTATTGTTTAAAGATCGGAAGAGCGGTTTCAG           |
| chr9  | 8389182   | 8389221   | PTPRD_5175   | - | GTGACCTATGCACCAGACGTGTATCCACTCTTTCCCTTTTAAAAATTTCCCTCAGAGTCAGATCGGAAGAGCGGTTTCAG     |
| chr9  | 8404487   | 8404526   | PTPRD_5176   | - | GTGACCTATGCACCAGACGTGCAGACATCACTGATACCTTTATTTTTCATGGATTTGAGTAAGATCGGAAGAGCGGTTTCAG   |
| chr9  | 8436542   | 8436581   | PTPRD_5177   | - | GTGACCTATGCACCAGACGTGTGTTTTATTCTTTACAGTAATTTCAAGAGTTACTCTTCTCAGATCGGAAGAGCGGTTTCAG   |
| chr9  | 8449675   | 8449714   | PTPRD_5178   | - | GTGACCTATGCACCAGACGTTACACATCTAATCCACACACAGCTTTCCTCAGAAAGTTGATAGATCGGAAGAGCGGTTTCAG   |
| chr9  | 8460361   | 8460400   | PTPRD_5179   | - | GTGACCTATGCACCAGACGTCCAATATTTCTGTGTAATTTGGAGGCTGCCTTATTTTAGATCGGAAGAGCGGTTTCAG       |
| chr9  | 8465416   | 8465455   | PTPRD_5180   | - | GTGACCTATGCACCAGACGTTATGATGGCTTGTTCCTATGGTACCGTTATACATTTTAGATCGGAAGAGCGGTTTCAG       |
| chr9  | 8470945   | 8470984   | PTPRD_5181   | - | GTGACCTATGCACCAGACGTCAATTGTTGGCCATGCTTTTTATTGTTTAAATCTGCTGAGATCGGAAGAGCGGTTTCAG      |
| chr9  | 8484069   | 8484108   | PTPRD_5182   | - | GTGACCTATGCACCAGACGTTGAAGGCTTAGGGCTGAAGGAAAGAATTATAGGTAATAGAGATCGGAAGAGCGGTTTCAG     |
| chr9  | 8485177   | 8485216   | PTPRD_5183   | - | GTGACCTATGCACCAGACGTTTCTAATTTGTAAGAAATCACAGATAAAAGTAGAGGGACAGATCGGAAGAGCGGTTTCAG     |
| chr9  | 8485712   | 8485751   | PTPRD_5184   | - | GTGACCTATGCACCAGACGTTCTGCTTACGGCCCTTCCCTTTAAAGGATTGTCAGTCTTAGATCGGAAGAGCGGTTTCAG     |
| chr9  | 8492812   | 8492851   | PTPRD_5185   | - | GTGACCTATGCACCAGACGTTGTGCATGTATGTCCCTGAACAGTAATACTAATTTTAGATCGGAAGAGCGGTTTCAG        |
| chr9  | 8497192   | 8497231   | PTPRD_5186   | - | GTGACCTATGCACCAGACGTTTTGACTTGTGTCAAAAGCAGACTATATGCTTGTTTAGATCGGAAGAGCGGTTTCAG        |
| chr9  | 8499597   | 8499636   | PTPRD_5187   | - | GTGACCTATGCACCAGACGTGAAATTATGTACCTCTGTTTTATATAATAAGTTTATCTTAGATCGGAAGAGCGGTTTCAG     |
| chr9  | 8500704   | 8500743   | PTPRD_5188   | - | GTGACCTATGCACCAGACGTTCCGCTACGTCTGTTGCACCTTCTGACACAGTCTTATAGATCGGAAGAGCGGTTTCAG       |
| chr9  | 8504211   | 8504250   | PTPRD_5189   | - | GTGACCTATGCACCAGACGTCCTTTGCTTACTTTCTGCCTTTTTATTTCCTCGGGGAGAAAGATCGGAAGAGCGGTTTCAG    |
| chr9  | 8507251   | 8507290   | PTPRD_5190   | - | GTGACCTATGCACCAGACGTAGTCTTCTCACCTTGGGAATTATTCATTACGTTGGGCAAGATCGGAAGAGCGGTTTCAG      |
| chr9  | 8517798   | 8517837   | PTPRD_5191   | - | GTGACCTATGCACCAGACGTTTGAGGAGGAAATAGGGCAGGAGGGCTGGTCAAAAGATCGGAAGAGCGGTTTCAG          |
| chr9  | 8521227   | 8521266   | PTPRD_5192   | - | GTGACCTATGCACCAGACGTTGGATTGCTTTGAGGATCTGGGTACACTCAAGCCAAGTAGATCGGAAGAGCGGTTTCAG      |
| chr9  | 8523463   | 8523502   | PTPRD_5193   | - | GTGACCTATGCACCAGACGTTTTTACTTTTTACCACCTTACAAAATTAATAAACAGATCGGAAGAGCGGTTTCAG          |
| chr9  | 8526577   | 8526616   | PTPRD_5194   | - | GTGACCTATGCACCAGACGTTGAACTAACGTTACAGAAATGATCTTACTATTCTTCTGAGATCGGAAGAGCGGTTTCAG      |
| chr9  | 8527295   | 8527334   | PTPRD_5195   | - | GTGACCTATGCACCAGACGTAGTTCTGAAGCGCACTTCAACCCCACTAATTTCCATATCCAGATCGGAAGAGCGGTTTCAG    |
| chr9  | 8633267   | 8633306   | PTPRD_5196   | - | GTGACCTATGCACCAGACGTAAGTGAAGGTTGCTCTTGTGCTATTGTTACAATTTGTAAGATCGGAAGAGCGGTTTCAG      |
| chr9  | 8636649   | 8636688   | PTPRD_5197   | - | GTGACCTATGCACCAGACGTCATTGTTCTGTTTTCTGTTTTGAGGGAAGAAATGTATCTGCTGAGATCGGAAGAGCGGTTTCAG |
| chr9  | 8733730   | 8733769   | PTPRD_5198   | - | GTGACCTATGCACCAGACGTCTCCCTTCTCTAGGGGCTGTGACCATAATGAGTGGTTTAGATCGGAAGAGCGGTTTCAG      |
| chr9  | 8486006   | 8486045   | PTPRD_5199   | - | GTGACCTATGCACCAGACGTCCTTCACTCAGAAGGCACCCTTCAACCTCCGTCAGTTAAGATCGGAAGAGCGGTTTCAG      |
| chr9  | 8518089   | 8518128   | PTPRD_5200   | - | GTGACCTATGCACCAGACGTGAGGGATGTCCAGGCAGAAATGTTGAGTTCGACCACATTAGATCGGAAGAGCGGTTTCAG     |
| chr14 | 68290211  | 68290250  | RAD51L1_5201 | - | GTGACCTATGCACCAGACGTCCAGCAAAGAAAAGAAACCATGAAAAAACACAGAATAGATCGGAAGAGCGGTTTCAG        |
| chr14 | 68292131  | 68292170  | RAD51L1_5202 | - | GTGACCTATGCACCAGACGTATAAAGAGAGATTTTAAACATATATGTGTAACAAAGATAAGATCGGAAGAGCGGTTTCAG     |
| chr14 | 68301747  | 68301786  | RAD51L1_5203 | - | GTGACCTATGCACCAGACGTTAAAGTATTAAGTTTTTTTTCAACCTTATATATAATTCAAAAGATCGGAAGAGCGGTTTCAG   |
| chr14 | 68352536  | 68352575  | RAD51L1_5204 | - | GTGACCTATGCACCAGACGTAAAAATAGCACAAACGAAACAGTCAATTTACTTAAAGAGATCGGAAGAGCGGTTTCAG       |
| chr14 | 68758551  | 68758590  | RAD51L1_5205 | - | GTGACCTATGCACCAGACGTACAGGGAGAAGGGGTAGGGGGCAAGGGAGAAGAAAGACAGATCGGAAGAGCGGTTTCAG      |
| chr14 | 68878091  | 68878130  | RAD51L1_5206 | - | GTGACCTATGCACCAGACGTATGGTAAAGCAGCCTTTCAGATGCCCTTCTTGGATGGAGATCGGAAGAGCGGTTTCAG       |
| chr14 | 68934839  | 68934878  | RAD51L1_5207 | - | GTGACCTATGCACCAGACGTAGCACATTTTTCTAGGGTTAGTCAAAGGATCAGGGATGGGAGATCGGAAGAGCGGTTTCAG    |
| chr7  | 151164155 | 151164194 | RHEB_5208    | - | GTGACCTATGCACCAGACGTAAGCCTGAGACCTGGAAGATATTTCTACCTGAAGACAGATCGGAAGAGCGGTTTCAG        |
| chr7  | 151167607 | 151167646 | RHEB_5209    | - | GTGACCTATGCACCAGACGTCTATAAACCCTCAATTTGCAATGCGTCTCATCAGTCGAGAGATCGGAAGAGCGGTTTCAG     |
| chr7  | 151168430 | 151168469 | RHEB_5210    | - | GTGACCTATGCACCAGACGTTTTATAAAGTCAAATCTAAGATGATTTAGTCACTGAAGTAAGATCGGAAGAGCGGTTTCAG    |
| chr7  | 151168585 | 151168624 | RHEB_5211    | - | GTGACCTATGCACCAGACGTCCATTTTTATCTGCTTGTAGAGAAACTCTTTTAAATAGTAAGATCGGAAGAGCGGTTTCAG    |
| chr7  | 151174369 | 151174408 | RHEB_5212    | - | GTGACCTATGCACCAGACGTTGCTGCCTGCTTGAGTTGATTTGCTACTCATAGATAACATAGATCGGAAGAGCGGTTTCAG    |
| chr7  | 151181773 | 151181812 | RHEB_5213    | - | GTGACCTATGCACCAGACGTTTGGATCTCAGAACTTATACAGCATATCAGACGTCTAGATCGGAAGAGCGGTTTCAG        |
| chr7  | 151187979 | 151188018 | RHEB_5214    | - | GTGACCTATGCACCAGACGTTTTTCCATGTAAAAAAGTGAAGAACTTCCATTTTGTGTAAGATCGGAAGAGCGGTTTCAG     |
| chr7  | 151216496 | 151216535 | RHEB_5215    | - | GTGACCTATGCACCAGACGTGGTGGCCGCGCGCTTCCGCGCCGCGGGGCTCGCTAGATCGGAAGAGCGGTTTCAG          |
| chr3  | 49397592  | 49397631  | RHOA_5216    | - | GTGACCTATGCACCAGACGTCAAGCACAGCCCTTATGCGGTTAATTTGAAGTGTCTTTTAGATCGGAAGAGCGGTTTCAG     |
| chr3  | 49399879  | 49399918  | RHOA_5217    | - | GTGACCTATGCACCAGACGTGGGCAGGACTGTCTGTAGATTCTTGAAGTGGGCCCAAGATCGGAAGAGCGGTTTCAG        |
| chr3  | 49405811  | 49405850  | RHOA_5218    | - | GTGACCTATGCACCAGACGTCTGCCACCTGATTTTGCCTGCCTGTGTAGCTAGTTGGAGATCGGAAGAGCGGTTTCAG       |
| chr3  | 49412817  | 49412856  | RHOA_5219    | - | GTGACCTATGCACCAGACGTTTTTCAACCACTGATGCCATTTTCCATTTGTAAGATTTAGATCGGAAGAGCGGTTTCAG      |
| chr1  | 26856362  | 26856401  | RPS6KA1_5220 | - | GTGACCTATGCACCAGACGTCCAGCTCACCCGCTCTCTCCGGCGGCCCGGCTCGCAGATCGGAAGAGCGGTTTCAG         |

|       |           |           |              |   |                                                                                              |
|-------|-----------|-----------|--------------|---|----------------------------------------------------------------------------------------------|
| chr1  | 26863366  | 26863405  | RPS6KA1_5221 | - | GTGACCTATGCACCAGACGTGAAAGGAGATTGGGGGAGCACTGTGCAGAACTTACACGCTTAGATCGGAAGAGCGGTTTCAG           |
| chr1  | 26872342  | 26872381  | RPS6KA1_5222 | - | GTGACCTATGCACCAGACGTGGGCCACGGCACCATGGCAGGAGCAGGCAGAGTCCGGGGCAGATCGGAAGAGCGGTTTCAG            |
| chr1  | 26873308  | 26873347  | RPS6KA1_5223 | - | GTGACCTATGCACCAGACGTGACAGAGCTGGTGGGCATGGTGGGCCCCATCCAGGCAGCAAGATCGGAAGAGCGGTTTCAG            |
| chr1  | 26873630  | 26873669  | RPS6KA1_5224 | - | GTGACCTATGCACCAGACGTAGAGCAGGAAGCAGGGCAGAAGATGGGAGAGGTCTGAGTCAGATCGGAAGAGCGGTTTCAG            |
| chr1  | 26877838  | 26877877  | RPS6KA1_5225 | - | GTGACCTATGCACCAGACGTGAGAAGGAATCACCAGTAGCCTAGACACTCAACACAGCAGATCGGAAGAGCGGTTTCAG              |
| chr1  | 26878085  | 26878124  | RPS6KA1_5226 | - | GTGACCTATGCACCAGACGTGGGAAAAGCCAAAGTGAGAGTCGGCGCGGCCTTATGATCTAGATCGGAAGAGCGGTTTCAG            |
| chr1  | 26879832  | 26879871  | RPS6KA1_5227 | - | GTGACCTATGCACCAGACGTGAGGAGGGGCCTTCAGCAGAGGCACTCCTTCCTTAAGAGATCGGAAGAGCGGTTTCAG               |
| chr1  | 26880655  | 26880694  | RPS6KA1_5228 | - | GTGACCTATGCACCAGACGTGAAATAGTGGTCAGGGCCCCCTCAGCTGTGGCCGTGTGGGTAGATCGGAAGAGCGGTTTCAG           |
| chr1  | 26881037  | 26881076  | RPS6KA1_5229 | - | GTGACCTATGCACCAGACGTGAGGGCAGGAGGACACACTTAGGACCCCTGCCCTTCCTTGAGATCGGAAGAGCGGTTTCAG            |
| chr1  | 26881592  | 26881631  | RPS6KA1_5230 | - | GTGACCTATGCACCAGACGTCAAGGATCTATTCAGGCTCTGATCCCTGTCTCCGACACACAGATCGGAAGAGCGGTTTCAG            |
| chr1  | 26881978  | 26882017  | RPS6KA1_5231 | - | GTGACCTATGCACCAGACGTCCCCGGGACTCATCAAGGCTGAGCCCTGCCCCAGAGGCCCATCGGAAGAGCGGTTTCAG              |
| chr1  | 26883095  | 26883134  | RPS6KA1_5232 | - | GTGACCTATGCACCAGACGTCCAAATGAAGGGTCTGTCCCTGGCTGGCACAAGTCCCAAGATCGGAAGAGCGGTTTCAG              |
| chr1  | 26883439  | 26883478  | RPS6KA1_5233 | - | GTGACCTATGCACCAGACGTGGGTGGGCACCTGTGGTCACTATGCCATCCTCAACAGCCCAAGATCGGAAGAGCGGTTTCAG           |
| chr1  | 26885248  | 26885287  | RPS6KA1_5234 | - | GTGACCTATGCACCAGACGTGGAAGGAGAATGTGAGGGTACCTGAGGAGGTCCCTCGACAGATCGGAAGAGCGGTTTCAG             |
| chr1  | 26887167  | 26887206  | RPS6KA1_5235 | - | GTGACCTATGCACCAGACGTCCAAAATTGTGGCTGACCCTGGCTCTAGAGTGTAGGGAGATCGGAAGAGCGGTTTCAG               |
| chr1  | 26887486  | 26887525  | RPS6KA1_5236 | - | GTGACCTATGCACCAGACGTGGGGTGCATGTGGCAGTGTCAGGGTGACAGGGTCCAGGGTAGATCGGAAGAGCGGTTTCAG            |
| chr1  | 26887946  | 26887985  | RPS6KA1_5237 | - | GTGACCTATGCACCAGACGTCTCCACTCACCATCAGGCTCTCTCCCAAGTGTGAGGCTGAGCAGATCGGAAGAGCGGTTTCAG          |
| chr1  | 26897890  | 26897929  | RPS6KA1_5238 | - | GTGACCTATGCACCAGACGTGGGGTGGGGCTAGTTCAGTGTGGGAGGTGGTGGTGTGAGATCGGAAGAGCGGTTTCAG               |
| chr1  | 26898290  | 26898329  | RPS6KA1_5239 | - | GTGACCTATGCACCAGACGTGGCAGGGGAGGTGGTCACTGTGGGGGGCAGTAGAAAGTCAGATCGGAAGAGCGGTTTCAG             |
| chr1  | 26898617  | 26898656  | RPS6KA1_5240 | - | GTGACCTATGCACCAGACGTGCCCGCACGGTCTGGGTACAGACTCTGGCTCCACTGTGGAGATCGGAAGAGCGGTTTCAG             |
| chr1  | 26899665  | 26899704  | RPS6KA1_5241 | - | GTGACCTATGCACCAGACGTAGTGGGCAAGGGGTTGGGGAGGGCTGCAGGGGAGCAGGAGATCGGAAGAGCGGTTTCAG              |
| chr1  | 26900520  | 26900559  | RPS6KA1_5242 | - | GTGACCTATGCACCAGACGTAGTGGCGGAGGTCAGGTCACAAATGGTGGGAGATGTAGCGGGAGATCGGAAGAGCGGTTTCAG          |
| chr17 | 57970496  | 57970535  | RPS6KB1_5243 | - | GTGACCTATGCACCAGACGTCCGGCGCAGCCACACAGCCGCTGCCGCCATCACCGGTGTAGATCGGAAGAGCGGTTTCAG             |
| chr17 | 57987873  | 57987912  | RPS6KB1_5244 | - | GTGACCTATGCACCAGACGTGGTGTAAAAGTTTCAGAATAATCTAATAAACATAAAATTTAGATCGGAAGAGCGGTTTCAG            |
| chr17 | 57989995  | 57990034  | RPS6KB1_5245 | - | GTGACCTATGCACCAGACGTAAGCAAACCAAAATAAATTTGCAAAAAGTTAAATTAAGATCGGAAGAGCGGTTTCAG                |
| chr17 | 57991946  | 57991985  | RPS6KB1_5246 | - | GTGACCTATGCACCAGACGTAAAAAGTGTGTGTATTTCAAAGGCAAACTATGTCAGGCATAGATCGGAAGAGCGGTTTCAG            |
| chr17 | 58003746  | 58003785  | RPS6KB1_5247 | - | GTGACCTATGCACCAGACGTAGAGATCATCTAAGAACAATAAGTAGAACATTTTATTAGATCGGAAGAGCGGTTTCAG               |
| chr17 | 58007428  | 58007467  | RPS6KB1_5248 | - | GTGACCTATGCACCAGACGTAAAGGAAAAAACATTAATAAAACAAGTATTTATTTCCAAAGATCGGAAGAGCGGTTTCAG             |
| chr17 | 58008933  | 58008972  | RPS6KB1_5249 | - | GTGACCTATGCACCAGACGTAAAGTATTAAATAAAATTAAGAGGTAATCTATCCAAGATCGGAAGAGCGGTTTCAG                 |
| chr17 | 58011481  | 58011520  | RPS6KB1_5250 | - | GTGACCTATGCACCAGACGTGATTACAGCATGATTATTCTCCGAATTAAGTATGTGCAGATCGGAAGAGCGGTTTCAG               |
| chr17 | 58011745  | 58011784  | RPS6KB1_5251 | - | GTGACCTATGCACCAGACGTGAAATAATATGCTTAAAAATTACCCATTTGCATATCATAGATCGGAAGAGCGGTTTCAG              |
| chr17 | 58012504  | 58012543  | RPS6KB1_5252 | - | GTGACCTATGCACCAGACGTGAAACAAGTAAATAATATAGCAGGGAGAGAAAAATAAAGATCGGAAGAGCGGTTTCAG               |
| chr17 | 58013526  | 58013565  | RPS6KB1_5253 | - | GTGACCTATGCACCAGACGTGAAAAAAGCTTGGATAAAGAACCTTAGTCAAACATGATTAGATCGGAAGAGCGGTTTCAG             |
| chr17 | 58013775  | 58013814  | RPS6KB1_5254 | - | GTGACCTATGCACCAGACGTAAAAGCAGGAAGAAAAGTTGAGGGGACTAGACCTTTTCTGGAGATCGGAAGAGCGGTTTCAG           |
| chr17 | 58018147  | 58018186  | RPS6KB1_5255 | - | GTGACCTATGCACCAGACGTGAAAAATAATTAGAAAATAAATAAATAGTCCATGTTACATAGATCGGAAGAGCGGTTTCAG            |
| chr17 | 58022717  | 58022756  | RPS6KB1_5256 | - | GTGACCTATGCACCAGACGTGAACAGTGGACTACAGAATGGCATTTTGTATGTATCTCAGATCGGAAGAGCGGTTTCAG              |
| chr17 | 58023862  | 58023901  | RPS6KB1_5257 | - | GTGACCTATGCACCAGACGTAGGAAGAGCTATCATTCACTTTGCTTAAAGGGTCATCTCAACAGATCGGAAGAGCGGTTTCAG          |
| chr8  | 92972420  | 92972459  | RUNX1T1_5258 | - | GTGACCTATGCACCAGACGTGAAACTGTCGGAGGAAGACAACACAACCAACGCGAAACCAGATCGGAAGAGCGGTTTCAG             |
| chr8  | 92982836  | 92982875  | RUNX1T1_5259 | - | GTGACCTATGCACCAGACGTGGGAAGCTCAAATAAAACAAGATAGTTTTTCACTCATTAAAGATCGGAAGAGCGGTTTCAG            |
| chr8  | 92988083  | 92988122  | RUNX1T1_5260 | - | GTGACCTATGCACCAGACGTTTTAAAAATGAGTTTTCTGTTCTGGCAGCTGTGTCGACAGATCGGAAGAGCGGTTTCAG              |
| chr8  | 92998302  | 92998341  | RUNX1T1_5261 | - | GTGACCTATGCACCAGACGTTCCAGATGAGTATCTCGAAAACCAATATTTCTTAGCTGTAGATCGGAAGAGCGGTTTCAG             |
| chr8  | 92999065  | 92999104  | RUNX1T1_5262 | - | GTGACCTATGCACCAGACGTAGTAATCATTGGGATTAATAAATGTTTGGAAAACAACGATCGGAAGAGCGGTTTCAG                |
| chr8  | 93003817  | 93003856  | RUNX1T1_5263 | - | GTGACCTATGCACCAGACGTGAGGACCTGTTCACTTCTTACGGGATGGTGTCTGAAGACAGATCGGAAGAGCGGTTTCAG             |
| chr8  | 93017294  | 93017333  | RUNX1T1_5264 | - | GTGACCTATGCACCAGACGTGAGGAGCCTGGATGAACCATGACCTTTTTCCATACCTGAGATCGGAAGAGCGGTTTCAG              |
| chr8  | 93023180  | 93023219  | RUNX1T1_5265 | - | GTGACCTATGCACCAGACGTGTTCACTGGTCTGTAAGATTTTAAACCATATTTGTTGATCGGAAGAGCGGTTTCAG                 |
| chr8  | 93026757  | 93026796  | RUNX1T1_5266 | - | GTGACCTATGCACCAGACGTGGAACCCAGTTTCTGTTGTAAAGGATAGTGGAATCGGAAGAGCGGTTTCAG                      |
| chr8  | 93029404  | 93029443  | RUNX1T1_5267 | - | GTGACCTATGCACCAGACGTATTTCAAGGCTTTTGGATTTTAAAGTTTAAATTAAGATCGGAAGAGCGGTTTCAG                  |
| chr8  | 93074724  | 93074763  | RUNX1T1_5268 | - | GTGACCTATGCACCAGACGTCTCTGTCTGTCTCTCTGTCTTCCAAATGAAGAAAGCTAGATCGGAAGAGCGGTTTCAG               |
| chr8  | 93088143  | 93088182  | RUNX1T1_5269 | - | GTGACCTATGCACCAGACGTGACAATAATTTTGAATTTTGAATTTACTTACGTACCAGAAGATCGGAAGAGCGGTTTCAG             |
| chr1  | 161284146 | 161284185 | SDHC_5270    | - | GTGACCTATGCACCAGACGTGGTCTGGACGGAAGTGACGCCAGGCGGCCCGCCACCCGAAGATCGGAAGAGCGGTTTCAG             |
| chr1  | 161293354 | 161293393 | SDHC_5271    | - | GTGACCTATGCACCAGACGTAGAGAACTAAAACCAATACACATTTAGAGATCAACTTTAAGATCGGAAGAGCGGTTTCAG             |
| chr1  | 161298136 | 161298175 | SDHC_5272    | - | GTGACCTATGCACCAGACGTGACAGACCTTTGAAAAATAACATAAATTTGTTTAAAGATAAATTTGTTTAAAGATCGGAAGAGCGGTTTCAG |
| chr1  | 161310334 | 161310373 | SDHC_5273    | - | GTGACCTATGCACCAGACGTACACACAAGACAATTTTAAAAGGAAAAGATGACACCATAGATCGGAAGAGCGGTTTCAG              |
| chr1  | 161326417 | 161326456 | SDHC_5274    | - | GTGACCTATGCACCAGACGTAAACAAAGTAGTCTGTACAGCTGCTCATAAGTTACAATAAGATCGGAAGAGCGGTTTCAG             |
| chr1  | 161332069 | 161332108 | SDHC_5275    | - | GTGACCTATGCACCAGACGTGCAAAAAAAGGAATTTCCAGTAAATAGGACATTAGATCGGAAGAGCGGTTTCAG                   |
| chr11 | 111957582 | 111957621 | SDHD_5276    | - | GTGACCTATGCACCAGACGTAGGCTCAAGGTCATCCACCAACCCGGAACCACTTAGGCAGATCGGAAGAGCGGTTTCAG              |
| chr11 | 111958531 | 111958570 | SDHD_5277    | - | GTGACCTATGCACCAGACGTAGTCAATGATGATCATAAAGCAACCTCTCCTTAAACAGGAAGATCGGAAGAGCGGTTTCAG            |
| chr11 | 111959541 | 111959580 | SDHD_5278    | - | GTGACCTATGCACCAGACGTGACCAAGATTCAATAAGGTTGATGTGAGAACACATCTTAGATCGGAAGAGCGGTTTCAG              |

|       |           |           |             |   |                                                                                    |
|-------|-----------|-----------|-------------|---|------------------------------------------------------------------------------------|
| chr11 | 111965479 | 111965518 | SDHD_5279   | - | GTGACCTATGCACCAGACGTGAGAAAAATCATAACATCAATAAAAAACCACAGTGAAATTAGATCGGAAGAGCGGTTTCAG  |
| chr10 | 88718405  | 88718444  | SNCG_5280   | - | GTGACCTATGCACCAGACGTCAGGGTTGTCTGCTGCGAGCCAGGACGGAGCTGGATCTCCAGATCGGAAGAGCGGTTTCAG  |
| chr10 | 88719340  | 88719379  | SNCG_5281   | - | GTGACCTATGCACCAGACGTAATGGAGCTGTGACCCAGACCTCCCTCGAGGTTGTGGGAGATCGGAAGAGCGGTTTCAG    |
| chr10 | 88719708  | 88719747  | SNCG_5282   | - | GTGACCTATGCACCAGACGTACTGCTGGCTGGCCCTCACCAGCCAGCCCAAGGCAGAGATCGGAAGAGCGGTTTCAG      |
| chr10 | 88722311  | 88722350  | SNCG_5283   | - | GTGACCTATGCACCAGACGTCAAAGGGGGCATGAGACCATGTGGAGAATCGAGAGACCAGATCGGAAGAGCGGTTTCAG    |
| chr10 | 88722672  | 88722711  | SNCG_5284   | - | GTGACCTATGCACCAGACGTTAATGACCTGCACACCCAGCTCCAGCCCGCCAGCTTATGATCGGAAGAGCGGTTTCAG     |
| chr12 | 93966624  | 93966663  | SOCS2_5285  | - | GTGACCTATGCACCAGACGTTACCCGCGGCAAGAGACAGGTGGCCGCCAGCTCAAGATCGGAAGAGCGGTTTCAG        |
| chr12 | 93968448  | 93968487  | SOCS2_5286  | - | GTGACCTATGCACCAGACGTTGTTCAAAGAAAAGAAAAGAGGGTAAAACAGTTATTAAGATCGGAAGAGCGGTTTCAG     |
| chr1  | 16174513  | 16174552  | SPEN_5287   | - | GTGACCTATGCACCAGACGTGTGCCGGCGACCGCCGCTGCTGGCTCCCCCTCGCCGGCTTAGATCGGAAGAGCGGTTTCAG  |
| chr1  | 16199261  | 16199300  | SPEN_5288   | - | GTGACCTATGCACCAGACGTTAAAGTCAACGTTATTGCTGCATATCAATAATTTTCAAAGATCGGAAGAGCGGTTTCAG    |
| chr1  | 16202647  | 16202686  | SPEN_5289   | - | GTGACCTATGCACCAGACGTGAGGGGGAAAAATATTTAATCAGAAAGGAGCAAGCAAAACAGATCGGAAGAGCGGTTTCAG  |
| chr1  | 16235766  | 16235805  | SPEN_5290   | - | GTGACCTATGCACCAGACGTGCAACAACAACAACCTTAGTGAAAGACAACAAGATAAGATCGGAAGAGCGGTTTCAG      |
| chr1  | 16237546  | 16237585  | SPEN_5291   | - | GTGACCTATGCACCAGACGTAAAAAAAACCAAGTTATTAACTTCTAATTTAATTTAAGATCGGAAGAGCGGTTTCAG      |
| chr1  | 16242573  | 16242612  | SPEN_5292   | - | GTGACCTATGCACCAGACGTAATGGGGCCGAGTAAAAAGAGAAGACAGATTTTAAATGCAGATCGGAAGAGCGGTTTCAG   |
| chr1  | 16245371  | 16245410  | SPEN_5293   | - | GTGACCTATGCACCAGACGTCAATGAATACAACCTTAGCAATATGCCCAAGAAAATAAATAGATCGGAAGAGCGGTTTCAG  |
| chr1  | 16245849  | 16245888  | SPEN_5294   | - | GTGACCTATGCACCAGACGTAAGGCAAAAATTTCTATTAGTAAAGTTCACAATTTACTATTAGATCGGAAGAGCGGTTTCAG |
| chr1  | 16247315  | 16247354  | SPEN_5295   | - | GTGACCTATGCACCAGACGTAAACAAAAGAAAACAGTAAGAGCCCTCACTCCAGCTTAGATCGGAAGAGCGGTTTCAG     |
| chr1  | 16248694  | 16248733  | SPEN_5296   | - | GTGACCTATGCACCAGACGTTAAAGAGGTGTTTGGCAAGTTCAAATTTTAAATGATGAGATCGGAAGAGCGGTTTCAG     |
| chr1  | 16254536  | 16254575  | SPEN_5297   | - | GTGACCTATGCACCAGACGTATAACAAAGATATTAGTCTTTTTGTTTCTCATCACTTATAGATCGGAAGAGCGGTTTCAG   |
| chr1  | 16263608  | 16263647  | SPEN_5298   | - | GTGACCTATGCACCAGACGTGAAGGAAGGCAAGGGACAGAGTCAAGTCTGTTGTGCACAAAGATCGGAAGAGCGGTTTCAG  |
| chr1  | 16264257  | 16264296  | SPEN_5299   | - | GTGACCTATGCACCAGACGTGGAACAACAGGAAGTGAGCTCATGGCCCCCTCGCTGAGCAGATCGGAAGAGCGGTTTCAG   |
| chr1  | 16265163  | 16265202  | SPEN_5300   | - | GTGACCTATGCACCAGACGTGGCCAGCTGCCAGTGAGCAGGGGGCCTCCTAGTCAAACAGCAGATCGGAAGAGCGGTTTCAG |
| chr1  | 16265741  | 16265780  | SPEN_5301   | - | GTGACCTATGCACCAGACGTGATAGAGAGCAAGTGGACCGCTGCTCTTCAACCCCAAGATCGGAAGAGCGGTTTCAG      |
| chr1  | 16255017  | 16255056  | SPEN_5302   | - | GTGACCTATGCACCAGACGTATCTGGAGGGGAGAGTGAAGCTCAGCTCAGACTTCCAGCTGATCGGAAGAGCGGTTTCAG   |
| chr1  | 16255498  | 16255537  | SPEN_5303   | - | GTGACCTATGCACCAGACGTTGATTCCAGTTTAGACAAGTCAAGATTTGACAGGCTCCGTCAGATCGGAAGAGCGGTTTCAG |
| chr1  | 16255979  | 16256018  | SPEN_5304   | - | GTGACCTATGCACCAGACGTATTACCTGCTAGTTCTCCAGTCTTGCTTGTAGGCTGAAGATCGGAAGAGCGGTTTCAG     |
| chr1  | 16256460  | 16256499  | SPEN_5305   | - | GTGACCTATGCACCAGACGTGAATCTTCGCTGATTTGGCGTGAACCTCTGTAATTCGGTTAGATCGGAAGAGCGGTTTCAG  |
| chr1  | 16256941  | 16256980  | SPEN_5306   | - | GTGACCTATGCACCAGACGTTAGCTTGTCTTCTGTCCTCAATAAAAAAGACAATCGAAGATCGGAAGAGCGGTTTCAG     |
| chr1  | 16257422  | 16257461  | SPEN_5307   | - | GTGACCTATGCACCAGACGTTGGAATCGTTGTGCTGTTTCTCCCTCAGATGCTGCTTAGATCGGAAGAGCGGTTTCAG     |
| chr1  | 16257903  | 16257942  | SPEN_5308   | - | GTGACCTATGCACCAGACGTGGAGGCTTGGCATTCCAGATTAAGCGGCTGGTCACTGATGAGATCGGAAGAGCGGTTTCAG  |
| chr1  | 16258384  | 16258423  | SPEN_5309   | - | GTGACCTATGCACCAGACGTGAGAGGCAAACTTGGTTCCGGATGTTCAAGGCTGCAGCAAGATCGGAAGAGCGGTTTCAG   |
| chr1  | 16258865  | 16258904  | SPEN_5310   | - | GTGACCTATGCACCAGACGTTTTAGGGGGTTTTTGTCTGTGCCAGCATCTTTTCTGTCAGATCGGAAGAGCGGTTTCAG    |
| chr1  | 16259346  | 16259385  | SPEN_5311   | - | GTGACCTATGCACCAGACGTGCAGCCAGCTCTGTTTCACTTGCTTGGTGTGCAGGCTTGTAGATCGGAAGAGCGGTTTCAG  |
| chr1  | 16259827  | 16259866  | SPEN_5312   | - | GTGACCTATGCACCAGACGTGTGCTGTACTGTTGTCCTCCTATTGCAAGCAGGACTCTCAAGATCGGAAGAGCGGTTTCAG  |
| chr1  | 16260308  | 16260347  | SPEN_5313   | - | GTGACCTATGCACCAGACGTGAATCTTCTCAGGGTGCTGGAGCTGGTGTCAACATCAGAATCGGAAGAGCGGTTTCAG     |
| chr1  | 16260789  | 16260828  | SPEN_5314   | - | GTGACCTATGCACCAGACGTTTTACAGGCCCTTTCAGGACGTTACGGGCCAGCAGGGGAGATCGGAAGAGCGGTTTCAG    |
| chr1  | 16261270  | 16261309  | SPEN_5315   | - | GTGACCTATGCACCAGACGTAGTTTACCTGGGACTTGGACACTGACTGCTGAAATCAAGATCGGAAGAGCGGTTTCAG     |
| chr1  | 16261751  | 16261790  | SPEN_5316   | - | GTGACCTATGCACCAGACGTCAGCTGCCAAATGGGAGACAGTTTCATGCTGGGATGCTAGATCGGAAGAGCGGTTTCAG    |
| chr1  | 16262232  | 16262271  | SPEN_5317   | - | GTGACCTATGCACCAGACGTACTAGTACTCTGACTGCACAGGGGCTGTGGCTCGAGCGAAGATCGGAAGAGCGGTTTCAG   |
| chrX  | 48887619  | 48887658  | TFE3_5318   | - | GTGACCTATGCACCAGACGTCCCCCTCCCTGGGACTTCCACCCAGGAAAGGAGGACCAAGATCGGAAGAGCGGTTTCAG    |
| chrX  | 48888862  | 48888901  | TFE3_5319   | - | GTGACCTATGCACCAGACGTAGGAGATGGTGTGGGGGAGGAGGGGAGAGCTTCTCTGCAAGATCGGAAGAGCGGTTTCAG   |
| chrX  | 48890930  | 48890969  | TFE3_5320   | - | GTGACCTATGCACCAGACGTGCTGGGACCCCTCAGGCCAGCGGGAGGTGGGGCAGGCGTCCAGATCGGAAGAGCGGTTTCAG |
| chrX  | 48891191  | 48891230  | TFE3_5321   | - | GTGACCTATGCACCAGACGTGAGCGTGTGCATTGCCCGGGTGTGTCAGGCTGCTCAAGATCGGAAGAGCGGTTTCAG      |
| chrX  | 48891599  | 48891638  | TFE3_5322   | - | GTGACCTATGCACCAGACGTGGGTCTTGGCCCATGGCCCTACACTTTACCCAGGTGAGAGATCGGAAGAGCGGTTTCAG    |
| chrX  | 48895485  | 48895524  | TFE3_5323   | - | GTGACCTATGCACCAGACGTGAGATGGGAGGTTGGTCTGAAAATTAGGGCACTTTCTGTATAGATCGGAAGAGCGGTTTCAG |
| chrX  | 48895672  | 48895711  | TFE3_5324   | - | GTGACCTATGCACCAGACGTACAGCCAACTCCCTCCCAACTCCCTCCCAATTTCTCAGATCGGAAGAGCGGTTTCAG      |
| chrX  | 48896582  | 48896621  | TFE3_5325   | - | GTGACCTATGCACCAGACGTATCCAGAGGCCCTGGGAGGGGGCTCCTGGTACTGAGGAGAGATCGGAAGAGCGGTTTCAG   |
| chrX  | 48897932  | 48897971  | TFE3_5326   | - | GTGACCTATGCACCAGACGTTGCTATCTGATCCCCTCCCAATTCCTCAGCCCTCCTAGATCGGAAGAGCGGTTTCAG      |
| chrX  | 48900587  | 48900626  | TFE3_5327   | - | GTGACCTATGCACCAGACGTGCCTGGGGCTGGGAGTGCAGGACTGGGGCTCCAGGGGCTAGATCGGAAGAGCGGTTTCAG   |
| chr9  | 101891087 | 101891126 | TGFBR1_5328 | - | GTGACCTATGCACCAGACGTAGAAAGATTCTTAGAAAAATCTCAAGGTTAACAGTTTGAAGATCGGAAGAGCGGTTTCAG   |
| chr9  | 101894741 | 101894780 | TGFBR1_5329 | - | GTGACCTATGCACCAGACGTGCCCTGAGTGAATAACATCAACAACAGCAAAAACATGAGATCGGAAGAGCGGTTTCAG     |
| chr9  | 101900091 | 101900130 | TGFBR1_5330 | - | GTGACCTATGCACCAGACGTAAATAAATAGTACTCAACAACATCAACAATATTACATGTTAGATCGGAAGAGCGGTTTCAG  |
| chr9  | 101904768 | 101904807 | TGFBR1_5331 | - | GTGACCTATGCACCAGACGTGAATTAACATTTGCGTTGGGCTGCAGACCATTATGATTTAGATCGGAAGAGCGGTTTCAG   |
| chr9  | 101906964 | 101907003 | TGFBR1_5332 | - | GTGACCTATGCACCAGACGTAAAAATTAACATGACTGCTTAAAAGTAAATCAACATCACAGATCGGAAGAGCGGTTTCAG   |
| chr9  | 101908717 | 101908756 | TGFBR1_5333 | - | GTGACCTATGCACCAGACGTTTTGCAAAAAGAACTTTGAAAATCATCCCCTACTGCCATAGATCGGAAGAGCGGTTTCAG   |
| chr9  | 101909886 | 101909925 | TGFBR1_5334 | - | GTGACCTATGCACCAGACGTTTAAAAAAATTAATTTTATGATTAATTTTACAGTAATGAGATCGGAAGAGCGGTTTCAG    |
| chr10 | 102893882 | 102893921 | TLX1_5335   | - | GTGACCTATGCACCAGACGTTGTTAACAGTGAAGGGTGAGAGGCCACTGGAGCGGACAGATCGGAAGAGCGGTTTCAG     |
| chr10 | 102896398 | 102896437 | TLX1_5336   | - | GTGACCTATGCACCAGACGTAAACAGCGTTACTGCCAGAGGCCAGCCAGCTCCCGAGATCGGAAGAGCGGTTTCAG       |

|       |           |           |             |   |                                                                                     |
|-------|-----------|-----------|-------------|---|-------------------------------------------------------------------------------------|
| chr3  | 195591002 | 195591041 | TNK2_5337   | - | GTGACCTATGCACCAGACGTGAGAGCCAGAGGGCCTGCCTGAAGGAATCACCTGAGCCTGAGATCGGAAGAGCGGTTTCAG   |
| chr3  | 195593710 | 195593749 | TNK2_5338   | - | GTGACCTATGCACCAGACGTCCACAGTCTGCCCGCTCCGTGCCCCAGGAGGGCTGTCAGATCGGAAGAGCGGTTTCAG      |
| chr3  | 195593990 | 195594029 | TNK2_5339   | - | GTGACCTATGCACCAGACGTCTCCTGCTCACTCTGGCTCTCAGGGACCCTGAAGCCTGGTAGATCGGAAGAGCGGTTTCAG   |
| chr3  | 195594182 | 195594221 | TNK2_5340   | - | GTGACCTATGCACCAGACGTAGCCTGGCTGTGGGCGAAGCGGGGCAGGGCCCAAGGGCCAGATCGGAAGAGCGGTTTCAG    |
| chr3  | 195596318 | 195596357 | TNK2_5341   | - | GTGACCTATGCACCAGACGTCTGCTCCGATGCCTTGGCCCCGCCCCCGCCCTCTCTAGATCGGAAGAGCGGTTTCAG       |
| chr3  | 195596935 | 195596974 | TNK2_5342   | - | GTGACCTATGCACCAGACGTCTCCTGGCTCCCTGGTGTCCCTAATCATCCGGCTACTCAGGAAGATCGGAAGAGCGGTTTCAG |
| chr3  | 195599097 | 195599136 | TNK2_5343   | - | GTGACCTATGCACCAGACGTGGCGGGTAGGATGCTGACCTGGCCCGCTCGGGACTCCAAGATCGGAAGAGCGGTTTCAG     |
| chr3  | 195605074 | 195605113 | TNK2_5344   | - | GTGACCTATGCACCAGACGTGAGGGCTGGGCCGCCCTGGGATCGCTTGAAGGGCACAGAGATCGGAAGAGCGGTTTCAG     |
| chr3  | 195605267 | 195605306 | TNK2_5345   | - | GTGACCTATGCACCAGACGTGGTCAGCCCAGGAGAGCTGGGGTGTTCAGCTGAGGGGCTAGATCGGAAGAGCGGTTTCAG    |
| chr3  | 195605870 | 195605909 | TNK2_5346   | - | GTGACCTATGCACCAGACGTGGAGACGGGCCCCATAGGGCTGGTGGGGTGAATTCCATTAGATCGGAAGAGCGGTTTCAG    |
| chr3  | 195608872 | 195608911 | TNK2_5347   | - | GTGACCTATGCACCAGACGTGGTGCCTGCCAGCTCACAGAGTCCCTGCAGACCCAGGCCTCAGATCGGAAGAGCGGTTTCAG  |
| chr3  | 195609978 | 195610017 | TNK2_5348   | - | GTGACCTATGCACCAGACGTGGCGGGAGGGGGCGGGCAGGGAGAGGGCTCCGGTCCCAAGATCGGAAGAGCGGTTTCAG     |
| chr3  | 195611633 | 195611672 | TNK2_5349   | - | GTGACCTATGCACCAGACGTGTGTCTGCCAGCCAGCAGAGGCGATGGGACCCGGGGCTAGATCGGAAGAGCGGTTTCAG     |
| chr3  | 195615247 | 195615286 | TNK2_5350   | - | GTGACCTATGCACCAGACGTGTTGGCCTGGCTTGTCTTGCCTTACCCTTTCCGTCTTAGATCGGAAGAGCGGTTTCAG      |
| chr3  | 195622067 | 195622106 | TNK2_5351   | - | GTGACCTATGCACCAGACGTAGGCTAGGGATAGCCAGATACCTGGGCCCCAGACCCCTTAGATCGGAAGAGCGGTTTCAG    |
| chr3  | 195594631 | 195594670 | TNK2_5352   | - | GTGACCTATGCACCAGACGTCCAGAGCTTTGCCTCAGACCCCAAGTACGCCACCCCCAGAGATCGGAAGAGCGGTTTCAG    |
| chr3  | 195595080 | 195595119 | TNK2_5353   | - | GTGACCTATGCACCAGACGTAACTACGCCTTTGTCCCTGAGCAGGGCGCCGCCCTCAGATCGGAAGAGCGGTTTCAG       |
| chr19 | 54072581  | 54072620  | ZNF331_5354 | - | GTGACCTATGCACCAGACGTGTAAGAACTGTAGCTTCTCGGGTTTCCACTGAAGAAGATCGGAAGAGCGGTTTCAG        |
| chr19 | 54074808  | 54074847  | ZNF331_5355 | - | GTGACCTATGCACCAGACGTAAACCACACGTGCATGAAATGAAAGGAAACAGCTTCCAGATCGGAAGAGCGGTTTCAG      |
| chr19 | 54079901  | 54079940  | ZNF331_5356 | - | GTGACCTATGCACCAGACGTAGAACATATTTCTTTCTTTAGAGGGACACAAGTACAAAAGATCGGAAGAGCGGTTTCAG     |
| chr19 | 54080319  | 54080358  | ZNF331_5357 | - | GTGACCTATGCACCAGACGTATGAATTTTTGATGTTGAGTAAGCTGATTGCCCAACGAGATCGGAAGAGCGGTTTCAG      |
| chr19 | 54080737  | 54080776  | ZNF331_5358 | - | GTGACCTATGCACCAGACGTGGATCTTCTGTAGTGTAGTAAGGTAATTGACTCGAGTAAAGATCGGAAGAGCGGTTTCAG    |
| chr11 | 10327198  | 10327237  | ADM_5359    | - | GTGACCTATGCACCAGACGTAAAGCGACCCCTGAAAAGAAGAAGAGAGTCGAGCGTGAGATCGGAAGAGCGGTTTCAG      |
| chr11 | 10327446  | 10327485  | ADM_5360    | - | GTGACCTATGCACCAGACGTCAAGCAGCCGATTCGCGTCCAGTCAAGTACGCCACGGAGATCGGAAGAGCGGTTTCAG      |
| chr11 | 10327829  | 10327868  | ADM_5361    | - | GTGACCTATGCACCAGACGTGGGGAGGGGAAGAAAGGCAACTTGAGACCCCATCAAGCAAGATCGGAAGAGCGGTTTCAG    |
| chr14 | 20923755  | 20923794  | APEX1_5362  | - | GTGACCTATGCACCAGACGTAAAGCCCTTGGGCAGCTGTACCGCTCACCCACCGAAGCAAGATCGGAAGAGCGGTTTCAG    |
| chr14 | 20924023  | 20924062  | APEX1_5363  | - | GTGACCTATGCACCAGACGTAGTAATATATACTGACAAAAAGCTGGTGGTTTTCCAACCTCAGATCGGAAGAGCGGTTTCAG  |
| chr14 | 20924777  | 20924816  | APEX1_5364  | - | GTGACCTATGCACCAGACGTAAAGAAAGTGGGAAAACGTATTATCAATTCAGCAGAACATAGATCGGAAGAGCGGTTTCAG   |
| chr14 | 20925100  | 20925139  | APEX1_5365  | - | GTGACCTATGCACCAGACGTGAAAAGAGATTAGCATAAAAAATAAGAAAAGGAAAGATCGGAAGAGCGGTTTCAG         |
| chr14 | 20925359  | 20925398  | APEX1_5366  | - | GTGACCTATGCACCAGACGTACTTCTTTTTTTCCCTTGGGGTTCGAAGGTCAATTTTTCAGATCGGAAGAGCGGTTTCAG    |
| chr19 | 41725248  | 41725287  | AXL_5367    | - | GTGACCTATGCACCAGACGTCTTCTCAGAAGTGTGGGGCTCCCAGCGGGGAGGGGGAGATCGGAAGAGCGGTTTCAG       |
| chr19 | 41726491  | 41726530  | AXL_5368    | - | GTGACCTATGCACCAGACGTGATGGGAAGAGTTAGCTTAGGAACCCCCAGCTCCTTCCGAGATCGGAAGAGCGGTTTCAG    |
| chr19 | 41727001  | 41727040  | AXL_5369    | - | GTGACCTATGCACCAGACGTAAAGAGGAGACAGAGAGGTTTCAGGGTTCAGAGCTGGACACAGATCGGAAGAGCGGTTTCAG  |
| chr19 | 41727735  | 41727774  | AXL_5370    | - | GTGACCTATGCACCAGACGTGGGCAGTGGTAGAGGCTGGGGTCCCTCTGAGGCCCAAGAAGATCGGAAGAGCGGTTTCAG    |
| chr19 | 41736822  | 41736861  | AXL_5371    | - | GTGACCTATGCACCAGACGTATATGAGGGGAAGGTTCCAATATCAGAGAGGGGCAGGAAGGATCGGAAGAGCGGTTTCAG    |
| chr19 | 41737038  | 41737077  | AXL_5372    | - | GTGACCTATGCACCAGACGTACGGGAGAGATTGACCCTGGGGAGCCTTTGCTCAAAGCTCAGATCGGAAGAGCGGTTTCAG   |
| chr19 | 41743799  | 41743838  | AXL_5373    | - | GTGACCTATGCACCAGACGTGCAAGGGTGTGAGGACGGGACAGCAAGCAATCACACGAGATCGGAAGAGCGGTTTCAG      |
| chr19 | 41744325  | 41744364  | AXL_5374    | - | GTGACCTATGCACCAGACGTGGGAAGAGGGGAGCTGGCACCCCCACCTTCCCTGACCCAGATCGGAAGAGCGGTTTCAG     |
| chr19 | 41745019  | 41745058  | AXL_5375    | - | GTGACCTATGCACCAGACGTCAAGAAGTGGATCAGGGTAGAACCTTACCCCCAGCTGTTAGATCGGAAGAGCGGTTTCAG    |
| chr19 | 41745549  | 41745588  | AXL_5376    | - | GTGACCTATGCACCAGACGTAAAGGACAGAGGAGATGTGCTCAGAGAGGACAAGATGAGATCGGAAGAGCGGTTTCAG      |
| chr19 | 41748738  | 41748777  | AXL_5377    | - | GTGACCTATGCACCAGACGTGTATGAGGAACAGGTGATGAGGCTTGGATCCAGCTAGATCGGAAGAGCGGTTTCAG        |
| chr19 | 41749471  | 41749510  | AXL_5378    | - | GTGACCTATGCACCAGACGTGGGGGAGTAGGTGAGGGCAGGGAAAACCATGTGGAACCCAGATCGGAAGAGCGGTTTCAG    |
| chr19 | 41754598  | 41754637  | AXL_5379    | - | GTGACCTATGCACCAGACGTCCAGAGGGAGACACTGACCTCAGAGGGCCCGTGGGGACTGAGATCGGAAGAGCGGTTTCAG   |
| chr19 | 41758206  | 41758245  | AXL_5380    | - | GTGACCTATGCACCAGACGTAGAGAAAGTTCGTGAGGAGGAGGGGAGGAGGGGAGGACTAGATCGGAAGAGCGGTTTCAG    |
| chr19 | 41758701  | 41758740  | AXL_5381    | - | GTGACCTATGCACCAGACGTGAGTAGCCCTGTCACTCTGTCTGGGCAGAAAGGCCAGATCGGAAGAGCGGTTTCAG        |
| chr19 | 41759454  | 41759493  | AXL_5382    | - | GTGACCTATGCACCAGACGTGAAGCAGGTGAGGAGGAGGACTAACAGAGTCCCTTGTAGCGAGATCGGAAGAGCGGTTTCAG  |
| chr19 | 41762307  | 41762346  | AXL_5383    | - | GTGACCTATGCACCAGACGTGGGGAAAAGGAACAGGGTCAGGGCATCAGTACCTCCACCAGATCGGAAGAGCGGTTTCAG    |
| chr19 | 41763348  | 41763387  | AXL_5384    | - | GTGACCTATGCACCAGACGTGAGAGGAATTAGACAGTCTCTCTGCACAGAATCACCCAGATCGGAAGAGCGGTTTCAG      |
| chr19 | 41765408  | 41765447  | AXL_5385    | - | GTGACCTATGCACCAGACGTAAAATGAGGGGTGGGAGATTGAGCAGGGACTCAGAAGGGGAGATCGGAAGAGCGGTTTCAG   |
| chr11 | 102195191 | 102195230 | BIRC3_5386  | - | GTGACCTATGCACCAGACGTATGGGGAAGAAAAGGGACTAGCCTTTCTTAGGGAGGTAGATCGGAAGAGCGGTTTCAG      |
| chr11 | 102196147 | 102196186 | BIRC3_5387  | - | GTGACCTATGCACCAGACGTGTTTATGACAAAACTATGAAATACATAATTTGCCCACTAGATCGGAAGAGCGGTTTCAG     |
| chr11 | 102198733 | 102198772 | BIRC3_5388  | - | GTGACCTATGCACCAGACGTGAAAAGAAATAAAATTTAGGGATATTATACAAGTGAATAAGATCGGAAGAGCGGTTTCAG    |
| chr11 | 102201680 | 102201719 | BIRC3_5389  | - | GTGACCTATGCACCAGACGTCAAAGAATTTAACACATATTAGGATAGCCTTATATTTCTTAGATCGGAAGAGCGGTTTCAG   |
| chr11 | 102206647 | 102206686 | BIRC3_5390  | - | GTGACCTATGCACCAGACGTAAAGAAAACAGCATAAACATGTTCAAACCTCTGCTCACAAAAGATCGGAAGAGCGGTTTCAG  |
| chr11 | 102207441 | 102207480 | BIRC3_5391  | - | GTGACCTATGCACCAGACGTAAAAGAAAAGCATTACTATGACAAATAAGGTTAATATTAGATCGGAAGAGCGGTTTCAG     |
| chr11 | 102207590 | 102207629 | BIRC3_5392  | - | GTGACCTATGCACCAGACGTGAAAGAATTTTAAATAAAAGGCAGTTTGTCTTTCAGTGAAGATCGGAAGAGCGGTTTCAG    |
| chr11 | 102195617 | 102195656 | BIRC3_5393  | - | GTGACCTATGCACCAGACGTGAAGAAAGCTCAGCCACGAAATTAACCTGTTTTCTGTACCCGAGATCGGAAGAGCGGTTTCAG |
| chr14 | 54418521  | 54418560  | BMP4_5394   | - | GTGACCTATGCACCAGACGTTCACCCAGCTGCGTGGGGAGGGCTGGTGGGACTGGCTAAGATCGGAAGAGCGGTTTCAG     |

|       |           |           |             |   |                                                                                     |
|-------|-----------|-----------|-------------|---|-------------------------------------------------------------------------------------|
| chr14 | 54417128  | 54417167  | BMP4_5395   | - | GTGACCTATGCACCAGACGTCCTCCTGGTACACCTTTGGCCATGATGGCCGGGGCCATGCCAGATCGGAAGAGCGGTTTCAG  |
| chr10 | 88635726  | 88635765  | BMPR1A_5396 | - | GTGACCTATGCACCAGACGTTAATGTTTCTGTACTGTACCTTTAATAATTGGTCTTAGATCGGAAGAGCGGTTTCAG       |
| chr10 | 88649769  | 88649808  | BMPR1A_5397 | - | GTGACCTATGCACCAGACGTATATGGAATTTGTAAGTAAATCATTTCTGAAAAGCTCATTAGATCGGAAGAGCGGTTTCAG   |
| chr10 | 88659501  | 88659540  | BMPR1A_5398 | - | GTGACCTATGCACCAGACGTAGTAATGATAAAATAGAAATGGTTGGTATTTAAACTGAGATCGGAAGAGCGGTTTCAG      |
| chr10 | 88659734  | 88659773  | BMPR1A_5399 | - | GTGACCTATGCACCAGACGTAAGTAAACAATGTAAACAATTTGAAATGAAAAAATAATCTGAGATCGGAAGAGCGGTTTCAG  |
| chr10 | 88671947  | 88671986  | BMPR1A_5400 | - | GTGACCTATGCACCAGACGTAGCAGAAAACAATCTACATTTAAAAATGAAAAACTATAAAAAAGATCGGAAGAGCGGTTTCAG |
| chr10 | 88676841  | 88676880  | BMPR1A_5401 | - | GTGACCTATGCACCAGACGTTAAAAGTAAAAGGTTTGAGCTTTGATGAAAGAAAACCCATTAGATCGGAAGAGCGGTTTCAG  |
| chr10 | 88678879  | 88678918  | BMPR1A_5402 | - | GTGACCTATGCACCAGACGTGATGAGTTTAAAAGGTTAGTTATCATCAGAGATAGGCTAGAGATCGGAAGAGCGGTTTCAG   |
| chr10 | 88681227  | 88681266  | BMPR1A_5403 | - | GTGACCTATGCACCAGACGTAGAAAAGCAAGGTCCAAGTTGAGGGCCAAAATAAAATAGAGATCGGAAGAGCGGTTTCAG    |
| chr10 | 88683083  | 88683122  | BMPR1A_5404 | - | GTGACCTATGCACCAGACGTATGAGAAAACATGGGCACAAAATGGTTGCTGGACAAGATAGATCGGAAGAGCGGTTTCAG    |
| chr10 | 88683301  | 88683340  | BMPR1A_5405 | - | GTGACCTATGCACCAGACGTAAGAGATGTTCACTGAGCAGAGAATATATTTGGTGGCATTAGATCGGAAGAGCGGTTTCAG   |
| chr3  | 48200385  | 48200424  | CDC25A_5406 | - | GTGACCTATGCACCAGACGTACCAGCCAGCAGCCCAAGCTTCCCTCCATCCCCCTTTAGATCGGAAGAGCGGTTTCAG      |
| chr3  | 48200784  | 48200823  | CDC25A_5407 | - | GTGACCTATGCACCAGACGTGGTGTGGAGAGCATCTCTCCCTGCCCCAGTGGTAAGATCGGAAGAGCGGTTTCAG         |
| chr3  | 48205747  | 48205786  | CDC25A_5408 | - | GTGACCTATGCACCAGACGTACGGAACTGGGTTCTGGGGCACAGGCTCCATGATGCTTTAGATCGGAAGAGCGGTTTCAG    |
| chr3  | 48207076  | 48207115  | CDC25A_5409 | - | GTGACCTATGCACCAGACGTCTGAGACTTGCTGTAGAAGGAGCCCTAACAGGATCTGTGAGATCGGAAGAGCGGTTTCAG    |
| chr3  | 48207271  | 48207310  | CDC25A_5410 | - | GTGACCTATGCACCAGACGTCTTTTGAACCCACCACACATCGGGTACTTGAATCTAGTAGATCGGAAGAGCGGTTTCAG     |
| chr3  | 48209286  | 48209325  | CDC25A_5411 | - | GTGACCTATGCACCAGACGTGCAGAGCTGCTCTGGCAAGTGTAGGAGGGAGTGGGTTATAGATCGGAAGAGCGGTTTCAG    |
| chr3  | 48218811  | 48218850  | CDC25A_5412 | - | GTGACCTATGCACCAGACGTCTAGTGCTGTGGAGAACGCTCGTGATTGGGGCACTGAGATCGGAAGAGCGGTTTCAG       |
| chr3  | 48219294  | 48219333  | CDC25A_5413 | - | GTGACCTATGCACCAGACGTTGTGTGTGTGTTTCTATTGTTCTACTAATTAATACCAGATCGGAAGAGCGGTTTCAG       |
| chr3  | 48222161  | 48222200  | CDC25A_5414 | - | GTGACCTATGCACCAGACGTTGGCTTTTATAGGGGAATTCCTGACAGGAAGAAAGGATTAAGATCGGAAGAGCGGTTTCAG   |
| chr3  | 48224369  | 48224408  | CDC25A_5415 | - | GTGACCTATGCACCAGACGTCTCAATGTACTAACCTGAGGCAGAGGTGAAACCCACAGGAGATCGGAAGAGCGGTTTCAG    |
| chr3  | 48225240  | 48225279  | CDC25A_5416 | - | GTGACCTATGCACCAGACGTTCCCTTGTATTTTATTTGAGCTAATACCTGTTATCTGTTCTTAGATCGGAAGAGCGGTTTCAG |
| chr3  | 48226093  | 48226132  | CDC25A_5417 | - | GTGACCTATGCACCAGACGTACTGCTTTCAAATGTTTATATGTAAGAAAACGTGTCTAAAGATCGGAAGAGCGGTTTCAG    |
| chr3  | 48228143  | 48228182  | CDC25A_5418 | - | GTGACCTATGCACCAGACGTCTGTGTTGGGGCAATACTTGAATTTCTGAAACATAGATCGGAAGAGCGGTTTCAG         |
| chr3  | 48229218  | 48229257  | CDC25A_5419 | - | GTGACCTATGCACCAGACGTACCGGCGGGCGGTGCTCCGGGCCCTGGCCTCGGTGTGCGGATCGGAAGAGCGGTTTCAG     |
| chr2  | 175666385 | 175666424 | CHN1_5420   | - | GTGACCTATGCACCAGACGTGACTTTGAGTCTTACACTTGTATTGCATCCAAATTTAAGAGATCGGAAGAGCGGTTTCAG    |
| chr2  | 175673583 | 175673622 | CHN1_5421   | - | GTGACCTATGCACCAGACGTATGCATGATTTCAAATAACCTGACAACGTCTCTTGGTAAGATCGGAAGAGCGGTTTCAG     |
| chr2  | 175676189 | 175676228 | CHN1_5422   | - | GTGACCTATGCACCAGACGTACAGATGTTCCATACTTAGGACAATAACTCTTTTCTAAGATCGGAAGAGCGGTTTCAG      |
| chr2  | 175676987 | 175677026 | CHN1_5423   | - | GTGACCTATGCACCAGACGTTGCAGTCGGGGTTCGAGTGGTCTCCGTCTACTACCAGTACAGATCGGAAGAGCGGTTTCAG   |
| chr2  | 175689112 | 175689151 | CHN1_5424   | - | GTGACCTATGCACCAGACGTTTGCTTTGTCTCTGATTGAGTCAAGTTGTGAAGTTATAAGATCGGAAGAGCGGTTTCAG     |
| chr2  | 175711558 | 175711597 | CHN1_5425   | - | GTGACCTATGCACCAGACGTTTGCTTTTGTCTTTAAGAAATGCATATTACTTGAATAAGATCGGAAGAGCGGTTTCAG      |
| chr2  | 175742518 | 175742557 | CHN1_5426   | - | GTGACCTATGCACCAGACGTATGAAACCACACTTATCTTTTTCTGTTTGGGGTCTTTTAGATCGGAAGAGCGGTTTCAG     |
| chr2  | 175779736 | 175779775 | CHN1_5427   | - | GTGACCTATGCACCAGACGTGGCCTGCAATTACTACTGTGCTTTATTTAAACTCTCTAAGATCGGAAGAGCGGTTTCAG     |
| chr2  | 175783212 | 175783251 | CHN1_5428   | - | GTGACCTATGCACCAGACGTATTTAGAAAACCTTTTATAGATTGGCATATGAAGCAAGATCGGAAGAGCGGTTTCAG       |
| chr2  | 175809566 | 175809605 | CHN1_5429   | - | GTGACCTATGCACCAGACGTTGAAACTGCTACCAAAATAATGCTCTCAACATCTGTTTTCAGATCGGAAGAGCGGTTTCAG   |
| chr2  | 175816842 | 175816881 | CHN1_5430   | - | GTGACCTATGCACCAGACGTAAATAATTGTGTGGTTATAGTGCTTTATAAGTAATATAAGATCGGAAGAGCGGTTTCAG     |
| chr2  | 175869572 | 175869611 | CHN1_5431   | - | GTGACCTATGCACCAGACGTCCGCTCCCCCGCGCCGCCAGGTGGGCCCGCTCCCGGGGAGATCGGAAGAGCGGTTTCAG     |
| chr12 | 57910542  | 57910581  | DDIT3_5432  | - | GTGACCTATGCACCAGACGTGCATCAGTCCCCACTTGGGCCACACTACCACCTTTCCAGATCGGAAGAGCGGTTTCAG      |
| chr12 | 57911002  | 57911041  | DDIT3_5433  | - | GTGACCTATGCACCAGACGTTAGCCCTAAAGCTAAAGGGGGATGTTACCTTTCCCTTCTCAGATCGGAAGAGCGGTTTCAG   |
| chr3  | 185867829 | 185867868 | DGKG_5434   | - | GTGACCTATGCACCAGACGTTAAACACCAGCTAAACCAAGAGAGAAAGCAAGAAACTATAAGATCGGAAGAGCGGTTTCAG   |
| chr3  | 185879342 | 185879381 | DGKG_5435   | - | GTGACCTATGCACCAGACGTTCCAATCTTGTAGATGGGATGAGAAGCCTTATTTTTGAGCAGATCGGAAGAGCGGTTTCAG   |
| chr3  | 185882637 | 185882676 | DGKG_5436   | - | GTGACCTATGCACCAGACGTTTGTACCCAACAGCCTCTGCATCTCCCCGCTGCGTACAAGATCGGAAGAGCGGTTTCAG     |
| chr3  | 185905941 | 185905980 | DGKG_5437   | - | GTGACCTATGCACCAGACGTAATGAGGATAATTGTTTTAGGTCAATGCCAGTAGTAGGTAGATCGGAAGAGCGGTTTCAG    |
| chr3  | 185929534 | 185929573 | DGKG_5438   | - | GTGACCTATGCACCAGACGTAAGTGGGGAGAAGGCTTCTGGATCTTGGTTCTGCTCTCAGATCGGAAGAGCGGTTTCAG     |
| chr3  | 185960243 | 185960282 | DGKG_5439   | - | GTGACCTATGCACCAGACGTGGCCCCGGTGGCTGCCACCCACCCAGTGTGGCCCTGGCGAGATCGGAAGAGCGGTTTCAG    |
| chr3  | 185969498 | 185969537 | DGKG_5440   | - | GTGACCTATGCACCAGACGTCAAAGCTCAACCTTCTGTATGAAAGGGAACCGCCAGAAAGATCGGAAGAGCGGTTTCAG     |
| chr3  | 185970832 | 185970871 | DGKG_5441   | - | GTGACCTATGCACCAGACGTATGCTAATGGTGGTACCCTGGGAACAGGTGTTCTGTTAAGATCGGAAGAGCGGTTTCAG     |
| chr3  | 185975593 | 185975632 | DGKG_5442   | - | GTGACCTATGCACCAGACGTGCTGAGAGGGCGTTTGTGCTTATTTATAGTAAGCGTATTAGATCGGAAGAGCGGTTTCAG    |
| chr3  | 185978178 | 185978217 | DGKG_5443   | - | GTGACCTATGCACCAGACGTACAACTTTTACCTTATTTCTCCCTCCCTTTTAAACAGATCGGAAGAGCGGTTTCAG        |
| chr3  | 185979438 | 185979477 | DGKG_5444   | - | GTGACCTATGCACCAGACGTTTCTGTTTCAAAGTGGAGCAACTAGGGCGACACGACTCAGAGATCGGAAGAGCGGTTTCAG   |
| chr3  | 185982986 | 185983025 | DGKG_5445   | - | GTGACCTATGCACCAGACGTAGCTCAAATCCGATGCACCTTCTAAGTTGTTCCAGGGCAGATCGGAAGAGCGGTTTCAG     |
| chr3  | 185985424 | 185985463 | DGKG_5446   | - | GTGACCTATGCACCAGACGTGCCCCGGCAGGGCTGTAGCTTCTCCGGTTCTGGTTTTCAGATCGGAAGAGCGGTTTCAG     |
| chr3  | 185986540 | 185986579 | DGKG_5447   | - | GTGACCTATGCACCAGACGTGCCCCAGGGCGGCCCTGCTTCTTTTCAACGTTTTTTTTGCCAGATCGGAAGAGCGGTTTCAG  |
| chr3  | 185989994 | 185990033 | DGKG_5448   | - | GTGACCTATGCACCAGACGTTCTACTGCCTTGTCTACTGCATGCCTCATCCAGAAACAAGATCGGAAGAGCGGTTTCAG     |
| chr3  | 185993286 | 185993325 | DGKG_5449   | - | GTGACCTATGCACCAGACGTTTCTTCAAACCTCTTCCCCCGGCACTATCTTGTCTGCAGATCGGAAGAGCGGTTTCAG      |
| chr3  | 185997590 | 185997629 | DGKG_5450   | - | GTGACCTATGCACCAGACGTTAAGCTGGAGTTTCAGAGATCTTGCCATTTCAGGAACATTGAGATCGGAAGAGCGGTTTCAG  |
| chr3  | 185998409 | 185998448 | DGKG_5451   | - | GTGACCTATGCACCAGACGTATAAGGATGGGGTGCTTTGAGTGGAGCTTCTAAGACAGATCGGAAGAGCGGTTTCAG       |
| chr3  | 186002399 | 186002438 | DGKG_5452   | - | GTGACCTATGCACCAGACGTACTCTAAATATCCCTCATGGAGCTGAGAAAGGCTGGGGGAAGATCGGAAGAGCGGTTTCAG   |

|       |           |           |            |   |                                                                                     |
|-------|-----------|-----------|------------|---|-------------------------------------------------------------------------------------|
| chr3  | 186006449 | 186006488 | DGKG_5453  | - | GTGACCTATGCACCAGACGTACCTGTCAAGGGGCTTCAGCTTTTTCTAGAGAAGGATCAGATCGGAAGAGCGGTTTCAG     |
| chr3  | 186015160 | 186015199 | DGKG_5454  | - | GTGACCTATGCACCAGACGTGGAATATAAGACTTGTGGGAAAAGTAGGGAATACCTCATCAGATCGGAAGAGCGGTTTCAG   |
| chr3  | 186015803 | 186015842 | DGKG_5455  | - | GTGACCTATGCACCAGACGTCTTTCCCAAGATGGGAAGACCTTGCGCAGCTCTCATCCCAGATCGGAAGAGCGGTTTCAG    |
| chr3  | 186024640 | 186024679 | DGKG_5456  | - | GTGACCTATGCACCAGACGTTCATTTTAAAGCCTTAAAAACCCTGTGTTTTTTAGCCAGATCGGAAGAGCGGTTTCAG      |
| chr3  | 186038132 | 186038171 | DGKG_5457  | - | GTGACCTATGCACCAGACGTGCATTGACAGCCCTGGGACGGGATTTCTTCTGGCTGGAGAGATCGGAAGAGCGGTTTCAG    |
| chr8  | 120569711 | 120569750 | ENPP2_5458 | - | GTGACCTATGCACCAGACGTATCTGCAGTACAGTCTTATCACTGGTTGTATATTTTTATAGATCGGAAGAGCGGTTTCAG    |
| chr8  | 120575047 | 120575086 | ENPP2_5459 | - | GTGACCTATGCACCAGACGTAGAGAGTCCCTTTAGGATTGTCCATAGTTTCCACTTCAGATCGGAAGAGCGGTTTCAG      |
| chr8  | 120577013 | 120577052 | ENPP2_5460 | - | GTGACCTATGCACCAGACGTCACTTCTACTCAGTGTGTGATTTTTAAGTCCCAAGATCTCAGATCGGAAGAGCGGTTTCAG   |
| chr8  | 120580365 | 120580404 | ENPP2_5461 | - | GTGACCTATGCACCAGACGTATTTACCTAATACTGTTATTTATGAAAATAAACATTTAGATCGGAAGAGCGGTTTCAG      |
| chr8  | 120581425 | 120581464 | ENPP2_5462 | - | GTGACCTATGCACCAGACGTAAATCAAGATCTGATGCCTTCAGAGGGATGTCACATTGTAGATCGGAAGAGCGGTTTCAG    |
| chr8  | 120584366 | 120584405 | ENPP2_5463 | - | GTGACCTATGCACCAGACGTAGTTTTGAAGGAAAAGCTGGGTTGTTTTACTGCCCTTAAGAGATCGGAAGAGCGGTTTCAG   |
| chr8  | 120592306 | 120592345 | ENPP2_5464 | - | GTGACCTATGCACCAGACGTGTGCAAAAATACAGATAAGGTTTTCTCGTTTTCGAAAAGATCGGAAGAGCGGTTTCAG      |
| chr8  | 120595907 | 120595946 | ENPP2_5465 | - | GTGACCTATGCACCAGACGTCAATTAATCAGAACCATTGAACAACATCTTAGTTAGTATAAGATCGGAAGAGCGGTTTCAG   |
| chr8  | 120596152 | 120596191 | ENPP2_5466 | - | GTGACCTATGCACCAGACGTAGAAGTGTGAATTGTGTTTTAGTGGTCTTCGAAAAGATCGGAAGAGCGGTTTCAG         |
| chr8  | 120598376 | 120598415 | ENPP2_5467 | - | GTGACCTATGCACCAGACGTTATGGGCTATTTCTGTTTTCTCATTTCCACAACCACCCCTTAGATCGGAAGAGCGGTTTCAG  |
| chr8  | 120599234 | 120599273 | ENPP2_5468 | - | GTGACCTATGCACCAGACGTCCAGTTGTCCCGCCTCGCCCTGCCACAGCCCTCGCCCTAGATCGGAAGAGCGGTTTCAG     |
| chr8  | 120605942 | 120605981 | ENPP2_5469 | - | GTGACCTATGCACCAGACGTGTTTTTTCTTGCTAATAGGATAGATGGATAATGTTTTCTGAGATCGGAAGAGCGGTTTCAG   |
| chr8  | 120608037 | 120608076 | ENPP2_5470 | - | GTGACCTATGCACCAGACGTCTATTGTCTTCAAGCTTTGTGGCGGGCAGGTCTGAGTTGAAGATCGGAAGAGCGGTTTCAG   |
| chr8  | 120612868 | 120612907 | ENPP2_5471 | - | GTGACCTATGCACCAGACGTTAGCATCTGCCTGAGAAGAATCTGTGGCCTGGGCTACCTAGATCGGAAGAGCGGTTTCAG    |
| chr8  | 120613587 | 120613626 | ENPP2_5472 | - | GTGACCTATGCACCAGACGTCTCTCTTTCTCTTTCTTCAGTACATTTCTATCTTAGATCGGAAGAGCGGTTTCAG         |
| chr8  | 120620112 | 120620151 | ENPP2_5473 | - | GTGACCTATGCACCAGACGTTTTTATTTTGCAATGTTTATAAAATGACAGCTATGATCAAGATCGGAAGAGCGGTTTCAG    |
| chr8  | 120628455 | 120628494 | ENPP2_5474 | - | GTGACCTATGCACCAGACGTCACTTATTGTGTCTATGTGTTTTGTGTGTTTATGATTAGATCGGAAGAGCGGTTTCAG      |
| chr8  | 120629354 | 120629393 | ENPP2_5475 | - | GTGACCTATGCACCAGACGTGTTTGAATGATACACATTCAAAAGGCTGATTTTCATCCGGAGATCGGAAGAGCGGTTTCAG   |
| chr8  | 120629656 | 120629695 | ENPP2_5476 | - | GTGACCTATGCACCAGACGTCCATCTCTGTCTTATCTGTAATCTGCATCTCCACAGATCGGAAGAGCGGTTTCAG         |
| chr8  | 120631434 | 120631473 | ENPP2_5477 | - | GTGACCTATGCACCAGACGTTTTATGACTATTTTGAAGTTTTATGATTAGCTGATAAACAGATCGGAAGAGCGGTTTCAG    |
| chr8  | 120633584 | 120633623 | ENPP2_5478 | - | GTGACCTATGCACCAGACGTCTTTGGATTGGCCTGAGCTTTAAAAGAATAAAAACGGAGATCGGAAGAGCGGTTTCAG      |
| chr8  | 120638755 | 120638794 | ENPP2_5479 | - | GTGACCTATGCACCAGACGTTATGAGTCCCTCTACTTCAAGTAGATGGCTTAAAGACTAGATCGGAAGAGCGGTTTCAG     |
| chr8  | 120650615 | 120650654 | ENPP2_5480 | - | GTGACCTATGCACCAGACGTAAGTATTTGCATTTTCAATTTTTAAAAATATACATACAGATCGGAAGAGCGGTTTCAG      |
| chr8  | 120650938 | 120650977 | ENPP2_5481 | - | GTGACCTATGCACCAGACGTGGAGGATACGGGGGACCTGTTGATCTTCAGAATCAGTAGATCGGAAGAGCGGTTTCAG      |
| chr1  | 16451660  | 16451699  | EPHA2_5482 | - | GTGACCTATGCACCAGACGTGGCCTGTGAGGCCCCCAGCCAAAGATACTTGAAGAAAACAGATCGGAAGAGCGGTTTCAG    |
| chr1  | 16455879  | 16455918  | EPHA2_5483 | - | GTGACCTATGCACCAGACGTCCCTTTCCGTCCCCCTCGCCTCCCGCCTCCCACTCCAGATCGGAAGAGCGGTTTCAG       |
| chr1  | 16456671  | 16456710  | EPHA2_5484 | - | GTGACCTATGCACCAGACGTGGCCTCTGCCCATGATGACCTCAATTTTCTTCTGCAGAAGATCGGAAGAGCGGTTTCAG     |
| chr1  | 16458166  | 16458205  | EPHA2_5485 | - | GTGACCTATGCACCAGACGTTTGCCTCCCAAGCCCTGCTCCGACCTGAACCTAAGCCCTAGATCGGAAGAGCGGTTTCAG    |
| chr1  | 16458509  | 16458548  | EPHA2_5486 | - | GTGACCTATGCACCAGACGTGAAGGGGACCTCAAGGGAGAAGCGCCCTCCGCCCTGCATGAGATCGGAAGAGCGGTTTCAG   |
| chr1  | 16458823  | 16458862  | EPHA2_5487 | - | GTGACCTATGCACCAGACGTGAGGGTGTAGGGGGGGGATGCCTGACCATTGAGCCCGGGAGATCGGAAGAGCGGTTTCAG    |
| chr1  | 16459625  | 16459664  | EPHA2_5488 | - | GTGACCTATGCACCAGACGTGGGCCTGCCACACTGGGTGGAGAGGGGCCACTTAGCAGGAGATCGGAAGAGCGGTTTCAG    |
| chr1  | 16459926  | 16459965  | EPHA2_5489 | - | GTGACCTATGCACCAGACGTCCCTGCCAAGGGGCCCTGAGGAGGCAGCGGTGGTGACAAGATCGGAAGAGCGGTTTCAG     |
| chr1  | 16460305  | 16460344  | EPHA2_5490 | - | GTGACCTATGCACCAGACGTGCCCTCCAGGCCAGCCCTGCCCGCACCCTCCAGAGATCGGAAGAGCGGTTTCAG          |
| chr1  | 16460913  | 16460952  | EPHA2_5491 | - | GTGACCTATGCACCAGACGTGCCATACCCTGGCTCCACATGGGCTGGGTGGGAAAATGAGATCGGAAGAGCGGTTTCAG     |
| chr1  | 16461481  | 16461520  | EPHA2_5492 | - | GTGACCTATGCACCAGACGTGGACCTGGGCTGGACAGCCAGGCCACAGCCAGAACGACATCGGAAGAGCGGTTTCAG       |
| chr1  | 16462100  | 16462139  | EPHA2_5493 | - | GTGACCTATGCACCAGACGTGAGGGGGGGGCTGGCTTAGCTGGGCCGACAGCAAGGGGAAGATCGGAAGAGCGGTTTCAG    |
| chr1  | 16464298  | 16464337  | EPHA2_5494 | - | GTGACCTATGCACCAGACGTGGGGTGGCAGCTGTGCCCTATGGGGCTGCCAGGTGGGGAGATCGGAAGAGCGGTTTCAG     |
| chr1  | 16464720  | 16464759  | EPHA2_5495 | - | GTGACCTATGCACCAGACGTGAGTGGGTGAGGGTGGCCTGACTGAGGGTGACGTGTCAGATCGGAAGAGCGGTTTCAG      |
| chr1  | 16474823  | 16474862  | EPHA2_5496 | - | GTGACCTATGCACCAGACGTGTTCTGGGTTGACGGGAAGGGGTTCTGCATTTCCAGGTTAGATCGGAAGAGCGGTTTCAG    |
| chr1  | 16482293  | 16482332  | EPHA2_5497 | - | GTGACCTATGCACCAGACGTGGCGGCTGGACCCCTGGCCCGCCCGCCCGCCAGATGCCCCAGATCGGAAGAGCGGTTTCAG   |
| chr1  | 16475158  | 16475197  | EPHA2_5498 | - | GTGACCTATGCACCAGACGTGAGCGCTCCGTTGGGGCCCTCCAGCAAGGCTTACCAGATCGGAAGAGCGGTTTCAG        |
| chr21 | 40181909  | 40181948  | ETS2_5499  | - | GTGACCTATGCACCAGACGTAAAAAAGTCAAAGAGGCCAAAAGATTAAGTACACTAAGATCGGAAGAGCGGTTTCAG       |
| chr21 | 40184877  | 40184916  | ETS2_5500  | - | GTGACCTATGCACCAGACGTAGATGAAAAAATGAAATACAATTTAAACTGATTGAGATCGGAAGAGCGGTTTCAG         |
| chr21 | 40186147  | 40186186  | ETS2_5501  | - | GTGACCTATGCACCAGACGTACCCTCCATGGGACATTAGGACTTCAAGTTGGTGATATCAGATCGGAAGAGCGGTTTCAG    |
| chr21 | 40186655  | 40186694  | ETS2_5502  | - | GTGACCTATGCACCAGACGTAGAAGAAAAATGAAACACATGAGGTAACAAACAGTGGAAAAGATCGGAAGAGCGGTTTCAG   |
| chr21 | 40188882  | 40188921  | ETS2_5503  | - | GTGACCTATGCACCAGACGTGACACAGGAGACGTAAGATGCCAGATGAGTGAAGTAAAACTAAGATCGGAAGAGCGGTTTCAG |
| chr21 | 40190299  | 40190338  | ETS2_5504  | - | GTGACCTATGCACCAGACGTACAATCGAGCCAGGACGCTCTTAAAGTCAAGTGTACCCTAGATCGGAAGAGCGGTTTCAG    |
| chr21 | 40191377  | 40191416  | ETS2_5505  | - | GTGACCTATGCACCAGACGTCAACCAACACATACTTTGATTCCTCCAGGACACAGTTGGAGATCGGAAGAGCGGTTTCAG    |
| chr21 | 40193460  | 40193499  | ETS2_5506  | - | GTGACCTATGCACCAGACGTAGGGAGGGAGACGGATCATACCCTTTCACAGATGTAATAATAGATCGGAAGAGCGGTTTCAG  |
| chr21 | 40194548  | 40194587  | ETS2_5507  | - | GTGACCTATGCACCAGACGTGATGGTGAAGAAAGTAAACTCAATTTGTAATGAAGAAGATCGGAAGAGCGGTTTCAG       |
| chr3  | 59737902  | 59737941  | FHIT_5508  | - | GTGACCTATGCACCAGACGTGATGCACTTTCGTCAATACCAGACCCCTCCGTTGGGCTCAGATCGGAAGAGCGGTTTCAG    |
| chr3  | 59908022  | 59908061  | FHIT_5509  | - | GTGACCTATGCACCAGACGTCTCTGTATCTTTGTTTTGATCAGCGGACTGTCGGTGAAGAGCGGTTTCAG              |
| chr3  | 59997047  | 59997086  | FHIT_5510  | - | GTGACCTATGCACCAGACGTTATTTGTGCATACAATAAATGAGAGCGGATTATGAGAACAGATCGGAAGAGCGGTTTCAG    |

|       |           |           |            |   |                                                                                                |
|-------|-----------|-----------|------------|---|------------------------------------------------------------------------------------------------|
| chr3  | 59999683  | 59999722  | FHIT_5511  | - | GTGACCTATGCACCAGACGTAGATTTCTCAGAAATGATTTTTCTCCCTTTCATATCCCGAGATCGGAAGAGCGGTTTCAG               |
| chr3  | 60522543  | 60522582  | FHIT_5512  | - | GTGACCTATGCACCAGACGTTTTTTTTTTTTTTGGAGAGGGAAAATAAAAAGTCTTCTGAGCCAGATCGGAAGAGCGGTTTCAG           |
| chr15 | 91418921  | 91418960  | FURIN_5513 | - | GTGACCTATGCACCAGACGTGGTGGCTGGGACCCTGGAGCGCCGCTCCTTGGCCTGGTAGATCGGAAGAGCGGTTTCAG                |
| chr15 | 91419435  | 91419474  | FURIN_5514 | - | GTGACCTATGCACCAGACGTGCAGGGAGACTGAGCTGGGCTTCCATCTGTGAGTCCCGAGATCGGAAGAGCGGTTTCAG                |
| chr15 | 91419642  | 91419681  | FURIN_5515 | - | GTGACCTATGCACCAGACGTGTGAGGGAGAGATGGTGTGGGTGGAGCAGGAGGCGAGAGATCGGAAGAGCGGTTTCAG                 |
| chr15 | 91420076  | 91420115  | FURIN_5516 | - | GTGACCTATGCACCAGACGTACCCACCCACTTATGAGACATGATTGGTTTTGTGAGAGATCGGAAGAGCGGTTTCAG                  |
| chr15 | 91420315  | 91420354  | FURIN_5517 | - | GTGACCTATGCACCAGACGTTTTGGCCACCATCAGGAGAAGGTGACCTACTGATAGAAGATCGGAAGAGCGGTTTCAG                 |
| chr15 | 91420707  | 91420746  | FURIN_5518 | - | GTGACCTATGCACCAGACGTCAAGCACGTAGCATGAGTAGAACAATAAGGGTGAACAGGGAGATCGGAAGAGCGGTTTCAG              |
| chr15 | 91421312  | 91421351  | FURIN_5519 | - | GTGACCTATGCACCAGACGTAGGGGGGGCAGGAAGAGGGATGCTGCATGGTCCAGCTGTAGATCGGAAGAGCGGTTTCAG               |
| chr15 | 91421944  | 91421983  | FURIN_5520 | - | GTGACCTATGCACCAGACGTAGTGGGCTGGGTCTATTCAAGATTGGGACTTGAGGGAGGGAGATCGGAAGAGCGGTTTCAG              |
| chr15 | 91422624  | 91422663  | FURIN_5521 | - | GTGACCTATGCACCAGACGTGAGAATCATATTGGGGCCCTGTGATGGGTGGAGGGGGCTAGAGATCGGAAGAGCGGTTTCAG             |
| chr15 | 91422851  | 91422890  | FURIN_5522 | - | GTGACCTATGCACCAGACGTGGAAGGGAGAGGCTGGGGTCACTTTTTGGGAGCAGCAGATCGGAAGAGCGGTTTCAG                  |
| chr15 | 91423047  | 91423086  | FURIN_5523 | - | GTGACCTATGCACCAGACGTAGGGAGGTTAGGGTCACTGTGAGGTCAGGTCAGGTCAGGTCAGAGTGCCTTCTAGATCGGAAGAGCGGTTTCAG |
| chr15 | 91423274  | 91423313  | FURIN_5524 | - | GTGACCTATGCACCAGACGTGAGCACCATGATGGTCACTGGCCAGAGGGACCAGCGGAGATCGGAAGAGCGGTTTCAG                 |
| chr15 | 91423871  | 91423910  | FURIN_5525 | - | GTGACCTATGCACCAGACGTGAGTGCACACAGCCCTGAGGCCCTGCGGGACCCCAAGCCAGATCGGAAGAGCGGTTTCAG               |
| chr15 | 91424110  | 91424149  | FURIN_5526 | - | GTGACCTATGCACCAGACGTGCGGGAGGAGGGCAAGAGTTAAGACAGTGTCTGGCACCAAGATCGGAAGAGCGGTTTCAG               |
| chr15 | 91424466  | 91424505  | FURIN_5527 | - | GTGACCTATGCACCAGACGTGGGAGAGAGGGCAAGTGTGTGTGAGTCAAAACAGACTGTAGAGATCGGAAGAGCGGTTTCAG             |
| chr15 | 91424762  | 91424801  | FURIN_5528 | - | GTGACCTATGCACCAGACGTGAGTGGCTGCTGTGGGGGACTCTGGCTGTCTAGATCGGAAGAGCGGTTTCAG                       |
| chr22 | 24376373  | 24376412  | GSTT1_5529 | - | GTGACCTATGCACCAGACGTCTCACCCCTTGCACGCTCCTCAGCAGTCCACAAGCATTTTATAGATCGGAAGAGCGGTTTCAG            |
| chr22 | 24376772  | 24376811  | GSTT1_5530 | - | GTGACCTATGCACCAGACGTTGGGCAGGTGAACCCACTAGGCAGGGGGCCCTGGCTAGTTAGATCGGAAGAGCGGTTTCAG              |
| chr22 | 24379311  | 24379350  | GSTT1_5531 | - | GTGACCTATGCACCAGACGTGAATGTGGGGGGCCGACGAGAGCATTCCCAAGGTGTAGATCGGAAGAGCGGTTTCAG                  |
| chr22 | 24384070  | 24384109  | GSTT1_5532 | - | GTGACCTATGCACCAGACGTCTCGGGTTTGGGGAACCGAAAAGTCAAGGAAGGGACAGGAGATCGGAAGAGCGGTTTCAG               |
| chr5  | 14100985  | 141001024 | HDAC3_5533 | - | GTGACCTATGCACCAGACGTGGATGCTGTGCCAAAGAAATTTCTTTTCACTCTTGGTTAGATCGGAAGAGCGGTTTCAG                |
| chr5  | 141004725 | 141004764 | HDAC3_5534 | - | GTGACCTATGCACCAGACGTAGGGTCACTGCTCCCTCAGGCTACCTTTCAATAGGCTTGGTGGAGGTAGATCGGAAGAGCGGTTTCAG       |
| chr5  | 141005202 | 141005241 | HDAC3_5535 | - | GTGACCTATGCACCAGACGTACAGAAAAGCTGAGCACAAACTTCTCCTGAAAGGTGGAGCCAGATCGGAAGAGCGGTTTCAG             |
| chr5  | 141005530 | 141005569 | HDAC3_5536 | - | GTGACCTATGCACCAGACGTCCCCACAACACCCCAATAACAGGAAGGCCATTCTCACAGAGATCGGAAGAGCGGTTTCAG               |
| chr5  | 141005711 | 141005750 | HDAC3_5537 | - | GTGACCTATGCACCAGACGTCTCCTGATTTCTCCCTGTTGTCCAGTGTGAGCTAGGGTGTAGATCGGAAGAGCGGTTTCAG              |
| chr5  | 141007410 | 141007449 | HDAC3_5538 | - | GTGACCTATGCACCAGACGTCTCCTTCTTCTCCCAAGGTTTTTAAGTGGCCTTGGACAGATCGGAAGAGCGGTTTCAG                 |
| chr5  | 141007631 | 141007670 | HDAC3_5539 | - | GTGACCTATGCACCAGACGTCACTTCTCCTCAGGATGTTCTGCTGGGCTTGGGAAAAGATCGGAAGAGCGGTTTCAG                  |
| chr5  | 141008076 | 141008115 | HDAC3_5540 | - | GTGACCTATGCACCAGACGTAAAGTCTTCCCTCTGTTCCCTTAGCCCTTCTTTTCTCCTAGATCGGAAGAGCGGTTTCAG               |
| chr5  | 141009201 | 141009240 | HDAC3_5541 | - | GTGACCTATGCACCAGACGTGAGGAGGATGGGGGCGATTACGGGATTTTGGCTGAGGAGATCGGAAGAGCGGTTTCAG                 |
| chr5  | 141009377 | 141009416 | HDAC3_5542 | - | GTGACCTATGCACCAGACGTAGGTGATGGAAAGACAGTGGCCATCCTAGGGTAGGTGTAGATCGGAAGAGCGGTTTCAG                |
| chr5  | 141009561 | 141009600 | HDAC3_5543 | - | GTGACCTATGCACCAGACGTCCCAGTCTGTTCTTCTCCTCTGGATCCCTGGACTCAGATCGGAAGAGCGGTTTCAG                   |
| chr5  | 141014328 | 141014367 | HDAC3_5544 | - | GTGACCTATGCACCAGACGTACTGGGATTTTTGATGTTCAACAGTTAATGCCAAGCCCTAGATCGGAAGAGCGGTTTCAG               |
| chr5  | 141016065 | 141016104 | HDAC3_5545 | - | GTGACCTATGCACCAGACGTCCCGCTCGGGGCTGGGGGTTGGGGGTGGGGCGAGCTGTGGCAGATCGGAAGAGCGGTTTCAG             |
| chr5  | 141016253 | 141016292 | HDAC3_5546 | - | GTGACCTATGCACCAGACGTAGGGATATGCATGAGGAGTTGGGACAGGAGTTTTTGGGAGATCGGAAGAGCGGTTTCAG                |
| chr19 | 10381786  | 10381825  | ICAM1_5547 | - | GTGACCTATGCACCAGACGTAGGTTGCAACTCTGAGTAGCAGAGGAGCTCAGCGTCGACTAGATCGGAAGAGCGGTTTCAG              |
| chr19 | 10394107  | 10394146  | ICAM1_5548 | - | GTGACCTATGCACCAGACGTACAGAGGTGGGGGTCTGGTGAAGTGGACCTTGTCTAGATCGGAAGAGCGGTTTCAG                   |
| chr19 | 10394659  | 10394698  | ICAM1_5549 | - | GTGACCTATGCACCAGACGTAAGAAAGGTGTGAGCAGACAGGGATGGACGTCCCGAAGCCAGATCGGAAGAGCGGTTTCAG              |
| chr19 | 10395029  | 10395068  | ICAM1_5550 | - | GTGACCTATGCACCAGACGTACACAGTAGGCCCCCGGGTTTCAAGTCAACCCCAAGATCGGAAGAGCGGTTTCAG                    |
| chr19 | 10395409  | 10395448  | ICAM1_5551 | - | GTGACCTATGCACCAGACGTACGATGAGATGACATGGAGTGGGTGGGGGACGAGCTTGGAGATCGGAAGAGCGGTTTCAG               |
| chr19 | 10395741  | 10395780  | ICAM1_5552 | - | GTGACCTATGCACCAGACGTGATACAACAGGCGGTGAGGATTGCATTAGGTCCATGGCCAGATCGGAAGAGCGGTTTCAG               |
| chr4  | 123374815 | 123374854 | IL2_5553   | - | GTGACCTATGCACCAGACGTACTTTATTTGCTCTCCTGGAATAAAAAAAAAAAAGTAGAGATCGGAAGAGCGGTTTCAG                |
| chr4  | 123377249 | 123377288 | IL2_5554   | - | GTGACCTATGCACCAGACGTTATTTTATGTTCAATTTCTGTTTTAATAAAATTTCAAAGTATAGATCGGAAGAGCGGTTTCAG            |
| chr4  | 123377399 | 123377438 | IL2_5555   | - | GTGACCTATGCACCAGACGTTTTCTTTCTTAAATTTTACTAAATTTATACATTTAGTAATCTAGCTAGATCGGAAGAGCGGTTTCAG        |
| chr10 | 6054785   | 6054824   | IL2RA_5556 | - | GTGACCTATGCACCAGACGTGAACAAAGAATTTCTTGGTAAGAGCCGGGAACAGACAACAGATCGGAAGAGCGGTTTCAG               |
| chr10 | 6059966   | 6060005   | IL2RA_5557 | - | GTGACCTATGCACCAGACGTACACCAAGGCACCCCTTGGTCAAGTCAAACTGTACAGATCGGAAGAGCGGTTTCAG                   |
| chr10 | 6061341   | 6061380   | IL2RA_5558 | - | GTGACCTATGCACCAGACGTCACTGGCTTTGGGACAAAATGTACACAGGCTGAGATATAGATCGGAAGAGCGGTTTCAG                |
| chr10 | 6061783   | 6061822   | IL2RA_5559 | - | GTGACCTATGCACCAGACGTAGACAAACGCTGGACACAGAGCCCTAGTCCAAAAGGGCAAGATCGGAAGAGCGGTTTCAG               |
| chr10 | 6066157   | 6066196   | IL2RA_5560 | - | GTGACCTATGCACCAGACGTAATCTGTCTCCAGCTAACTCTGCTAGCGCACCCCTTCTCAGATCGGAAGAGCGGTTTCAG               |
| chr10 | 6067747   | 6067786   | IL2RA_5561 | - | GTGACCTATGCACCAGACGTCTTCTGTACTACCAAGAATAAAAGAACTGCAGCAAGAGATCGGAAGAGCGGTTTCAG                  |
| chr10 | 6104001   | 6104040   | IL2RA_5562 | - | GTGACCTATGCACCAGACGTGTGGGTGGCCCCGGAAATTCGGGGAAGGCTGATGGCATTCCAGATCGGAAGAGCGGTTTCAG             |
| chr17 | 45351735  | 45351774  | ITGB3_5563 | - | GTGACCTATGCACCAGACGTGAGCAAAAGGCATTAGCACCAGATTTGGCTCAGTGAAGGTAGATCGGAAGAGCGGTTTCAG              |
| chr17 | 45360670  | 45360709  | ITGB3_5564 | - | GTGACCTATGCACCAGACGTGGAGCCAAAGAGAAGTCCAGCAATCAGAGCTATGGCAGAGATCGGAAGAGCGGTTTCAG                |
| chr17 | 45361759  | 45361798  | ITGB3_5565 | - | GTGACCTATGCACCAGACGTGAAAAGATGTTAGTTTTATCTTCTCTCCACCAAGATTGAGATCGGAAGAGCGGTTTCAG                |
| chr17 | 45363576  | 45363615  | ITGB3_5566 | - | GTGACCTATGCACCAGACGTATGGGATAATTTAAGCAGACACCTTCATGGAAAAGGCAAGATCGGAAGAGCGGTTTCAG                |
| chr17 | 45364386  | 45364425  | ITGB3_5567 | - | GTGACCTATGCACCAGACGTAAAACAATAAAAGCAAGAGAGGACAAAACAATTCAGAGATCGGAAGAGCGGTTTCAG                  |
| chr17 | 45366997  | 45367036  | ITGB3_5568 | - | GTGACCTATGCACCAGACGTGAAGGATGTAGAGGTTAATGACGTTCTCATGTACATCTTAAGATCGGAAGAGCGGTTTCAG              |



|       |           |           |             |   |                                                                                     |
|-------|-----------|-----------|-------------|---|-------------------------------------------------------------------------------------|
| chr17 | 45367501  | 45367540  | ITGB3_5569  | - | GTGACCTATGCACCAGACGTAAACAAAGATGTCCAGAGCTTACCAAAGGAAGCTGGTGGTAGATCGGAAGAGCGGTTTCAG   |
| chr17 | 45368270  | 45368309  | ITGB3_5570  | - | GTGACCTATGCACCAGACGTAGGGGCACAAGAAGACAAGAAATGAACTGAAAGGAAACGAGATCGGAAGAGCGGTTTCAG    |
| chr17 | 45369455  | 45369494  | ITGB3_5571  | - | GTGACCTATGCACCAGACGTAGAAAGATTGTATTTAGACACAGTTGGGCCAGTTAACACAGATCGGAAGAGCGGTTTCAG    |
| chr17 | 45376624  | 45376663  | ITGB3_5572  | - | GTGACCTATGCACCAGACGTACAGCCCAGGAAGGTGGACCCGCTGGCGAGAGCTCCACTCAGATCGGAAGAGCGGTTTCAG   |
| chr17 | 45377794  | 45377833  | ITGB3_5573  | - | GTGACCTATGCACCAGACGTGAGGACACAGTGATTAAGGCAAAGAGGAGCAAGCCTAAGAGATCGGAAGAGCGGTTTCAG    |
| chr17 | 45380037  | 45380076  | ITGB3_5574  | - | GTGACCTATGCACCAGACGTGGAAATGGAGGAATAAAAAGTGAGACAACACTACTGGAAGAAGATCGGAAGAGCGGTTTCAG  |
| chr17 | 45384787  | 45384826  | ITGB3_5575  | - | GTGACCTATGCACCAGACGTGAAACAGTAGGAGCAGGGCGGTTGTGAATGAAGCAGGAGTCAAGATCGGAAGAGCGGTTTCAG |
| chr17 | 45387455  | 45387494  | ITGB3_5576  | - | GTGACCTATGCACCAGACGTAAACAGAATAGCATCTTACAGTGACTTCTTAAAGTCTTCCAGATCGGAAGAGCGGTTTCAG   |
| chr19 | 17940867  | 17940906  | JAK3_5577   | - | GTGACCTATGCACCAGACGTGAGGGCTAGCCTCAGTTTCCAGTCTGTAGATTGGGCCGGAGATCGGAAGAGCGGTTTCAG    |
| chr19 | 17941262  | 17941301  | JAK3_5578   | - | GTGACCTATGCACCAGACGTTCACAGAGCCCCAGCCTTCTTCCCTCCACGCCCTCAGATCGGAAGAGCGGTTTCAG        |
| chr19 | 17942433  | 17942472  | JAK3_5579   | - | GTGACCTATGCACCAGACGTGCGCCCCGGGACTTGTGGGGATTTCAGCTGGCACGGCCTGGAGATCGGAAGAGCGGTTTCAG  |
| chr19 | 17943278  | 17943317  | JAK3_5580   | - | GTGACCTATGCACCAGACGTTCGCGGATGAGTGAACCAAGCATGGTGGTCTTTTCAAAGATCGGAAGAGCGGTTTCAG      |
| chr19 | 17943549  | 17943588  | JAK3_5581   | - | GTGACCTATGCACCAGACGTGAGGGCCAGGTTGGGTTGGAGAGGCGAGGCGCATCCAGAGATCGGAAGAGCGGTTTCAG     |
| chr19 | 17945330  | 17945369  | JAK3_5582   | - | GTGACCTATGCACCAGACGTGGACGGGTTGGGTGGGGAGGGCTGTGATGTCATATTGGGCAGATCGGAAGAGCGGTTTCAG   |
| chr19 | 17945611  | 17945650  | JAK3_5583   | - | GTGACCTATGCACCAGACGTCTCACCCGGCATCGGTCTCCGAACCCCACTTTGACAGAAAGATCGGAAGAGCGGTTTCAG    |
| chr19 | 17945842  | 17945881  | JAK3_5584   | - | GTGACCTATGCACCAGACGTGGAGGTGGAGGAGGGAGGGGCTGAGCAGGGCAAGGAAGTGAGATCGGAAGAGCGGTTTCAG   |
| chr19 | 17946683  | 17946722  | JAK3_5585   | - | GTGACCTATGCACCAGACGTCTGCCCTGCTCCACCCCTCCTTCCAGGGAAAGGCTTTCTAGATCGGAAGAGCGGTTTCAG    |
| chr19 | 17947888  | 17947927  | JAK3_5586   | - | GTGACCTATGCACCAGACGTCCACCCAGCCACCCACCCCTGCCTCACCCAAGCTAGGAGATCGGAAGAGCGGTTTCAG      |
| chr19 | 17948691  | 17948730  | JAK3_5587   | - | GTGACCTATGCACCAGACGTTGTGGACCAGACTTTTGGAGTCGGGGCTGGCTGGAGAGGGAGATCGGAAGAGCGGTTTCAG   |
| chr19 | 17949022  | 17949061  | JAK3_5588   | - | GTGACCTATGCACCAGACGTCTGGGAAATGAGGCGATACCTCAGTCTGGGGTCCAGAGACAGATCGGAAGAGCGGTTTCAG   |
| chr19 | 17950236  | 17950275  | JAK3_5589   | - | GTGACCTATGCACCAGACGTTCTCCCTGGAATGAGTGCTGATCTGGACCCTGGCTTAGATCGGAAGAGCGGTTTCAG       |
| chr19 | 17952148  | 17952187  | JAK3_5590   | - | GTGACCTATGCACCAGACGTGTCCTTCCCTCCCGCCTCTGTGGCCACTCAGGGCCCTCAGATCGGAAGAGCGGTTTCAG     |
| chr19 | 17952399  | 17952438  | JAK3_5591   | - | GTGACCTATGCACCAGACGTGATTCCTTCCCTCCCTCAGCCTTACCCCGAGGGCGGGCCAGATCGGAAGAGCGGTTTCAG    |
| chr19 | 17953075  | 17953114  | JAK3_5592   | - | GTGACCTATGCACCAGACGTACTCCCCGCTGGCGGGCCAGCCCACTGGGGCGGGGCTCGAGATCGGAAGAGCGGTTTCAG    |
| chr19 | 17953786  | 17953825  | JAK3_5593   | - | GTGACCTATGCACCAGACGTCCAGGCTGTGGGACGGCCTCTGCTTGGGAGTGAGCAACGAGATCGGAAGAGCGGTTTCAG    |
| chr19 | 17954139  | 17954178  | JAK3_5594   | - | GTGACCTATGCACCAGACGTGCCTGGGGTTTGACCCAGGGGTTGGGGTCCAAGGGCAAGATCGGAAGAGCGGTTTCAG      |
| chr19 | 17954536  | 17954575  | JAK3_5595   | - | GTGACCTATGCACCAGACGTCCCCCAGCCCCAGGGATTGTACAATTTTATCATCTCTAGATCGGAAGAGCGGTTTCAG      |
| chr19 | 17954993  | 17955032  | JAK3_5596   | - | GTGACCTATGCACCAGACGTCCCTAGTGGGCGCCAGAGGGAAGGATGGGGCTGTGTGAGATCGGAAGAGCGGTTTCAG      |
| chr5  | 56111351  | 56111390  | MAP3K1_5597 | - | GTGACCTATGCACCAGACGTGGGCTAGATTGCTGCGGCCCTGCCAGGGAGGGGAGGGGCAGATCGGAAGAGCGGTTTCAG    |
| chr5  | 56152377  | 56152416  | MAP3K1_5598 | - | GTGACCTATGCACCAGACGTGGCAGAAACAATAAATGAGAATGTATATATGAAAAATAGATCGGAAGAGCGGTTTCAG      |
| chr5  | 56155492  | 56155531  | MAP3K1_5599 | - | GTGACCTATGCACCAGACGTGATTTCCAATATTTTATTACTTAAAAATATAAAAGGTAAAGATCGGAAGAGCGGTTTCAG    |
| chr5  | 56160511  | 56160550  | MAP3K1_5600 | - | GTGACCTATGCACCAGACGTTTTTTTTTATTAGGTAGCTTTCTCATTTCTTAATTAAGAAGATCGGAAGAGCGGTTTCAG    |
| chr5  | 56161117  | 56161156  | MAP3K1_5601 | - | GTGACCTATGCACCAGACGTAAAAAGAAAACCTATAGGTTAATACATCTGTGGTTTCAAAAGATCGGAAGAGCGGTTTCAG   |
| chr5  | 56161606  | 56161645  | MAP3K1_5602 | - | GTGACCTATGCACCAGACGTAAAAAGACAGTAACAATGATATTTTGCCATAATTATACAAGATCGGAAGAGCGGTTTCAG    |
| chr5  | 56167687  | 56167726  | MAP3K1_5603 | - | GTGACCTATGCACCAGACGTGGGGAAGAAATTAAGCATAAAAGAAATATAAAGTAGATCGGAAGAGCGGTTTCAG         |
| chr5  | 56168418  | 56168457  | MAP3K1_5604 | - | GTGACCTATGCACCAGACGTACAGAAACAAAATCTTACAAAAATGTAATGTTTAAACATTAGATCGGAAGAGCGGTTTCAG   |
| chr5  | 56168602  | 56168641  | MAP3K1_5605 | - | GTGACCTATGCACCAGACGTAAATAACAAAATCTGCTTTAAAAAATAAGACAAACCACAGATCGGAAGAGCGGTTTCAG     |
| chr5  | 56170809  | 56170848  | MAP3K1_5606 | - | GTGACCTATGCACCAGACGTACACACAGATGAATTCATGTAAGAAAAGCTTATGGACCAGATCGGAAGAGCGGTTTCAG     |
| chr5  | 56174757  | 56174796  | MAP3K1_5607 | - | GTGACCTATGCACCAGACGTAAATCTGAAGGTCAGTTTATGTACACTTAAAAAGCATCAGAGATCGGAAGAGCGGTTTCAG   |
| chr5  | 56176488  | 56176527  | MAP3K1_5608 | - | GTGACCTATGCACCAGACGTAGGAAAAGCAACATCAATCTGGATCTTGGCTAAAACACTAGATCGGAAGAGCGGTTTCAG    |
| chr5  | 56176860  | 56176899  | MAP3K1_5609 | - | GTGACCTATGCACCAGACGTGAAAAGTAAAAATAAATGATTAATAAAATAGTATATTAATAAAGATCGGAAGAGCGGTTTCAG |
| chr5  | 56177347  | 56177386  | MAP3K1_5610 | - | GTGACCTATGCACCAGACGTAAAAACATTCATTACCATATAAGTTCCAATTACTGAAAAATAGATCGGAAGAGCGGTTTCAG  |
| chr5  | 56179304  | 56179343  | MAP3K1_5611 | - | GTGACCTATGCACCAGACGTAAAGAAAGCAATCTTTTACTGTTAAAGGAGTAAGATTTTAGATCGGAAGAGCGGTTTCAG    |
| chr5  | 56180441  | 56180480  | MAP3K1_5612 | - | GTGACCTATGCACCAGACGTAAACACGTTCAAAAAGTTTTGCATATTTTCACTAGCAATAGATCGGAAGAGCGGTTTCAG    |
| chr5  | 56181709  | 56181748  | MAP3K1_5613 | - | GTGACCTATGCACCAGACGTATAAGAAATATCATAAATTAAGACAGAATTAAGATAGATCGGAAGAGCGGTTTCAG        |
| chr5  | 56183155  | 56183194  | MAP3K1_5614 | - | GTGACCTATGCACCAGACGTACAGCAAAATGACTTGTATGTTAAAAACAAAATAAGAGATCGGAAGAGCGGTTTCAG       |
| chr5  | 56184003  | 56184042  | MAP3K1_5615 | - | GTGACCTATGCACCAGACGTTCCAGAGTTAATTTGAAATAGGACTCATTTGAAAAAGAGAAGATCGGAAGAGCGGTTTCAG   |
| chr5  | 56189308  | 56189347  | MAP3K1_5616 | - | GTGACCTATGCACCAGACGTAAAGCCAGTGTGAAGCTTTGCACAACTGTAACCTCTGATAGATCGGAAGAGCGGTTTCAG    |
| chr5  | 56177779  | 56177818  | MAP3K1_5617 | - | GTGACCTATGCACCAGACGTGCTCTCAGAAATGTCCCTGTAAGTGGCACTCAATTTTGTAGATCGGAAGAGCGGTTTCAG    |
| chr5  | 56178211  | 56178250  | MAP3K1_5618 | - | GTGACCTATGCACCAGACGTCTCCCTGTTTACTTGTATTACGGGGTAGGTCTAGATGGAGATCGGAAGAGCGGTTTCAG     |
| chr5  | 179663334 | 179663373 | MAPK9_5619  | - | GTGACCTATGCACCAGACGTATAGCAAACCTGTCAAGTGAAGCAACTCTCACCTCCGATCGGAAGAGCGGTTTCAG        |
| chr5  | 179663465 | 179663504 | MAPK9_5620  | - | GTGACCTATGCACCAGACGTCACCTCTCAGTCTTATCATGCAATGACATTTTCATCCAGATCGGAAGAGCGGTTTCAG      |
| chr5  | 179665282 | 179665321 | MAPK9_5621  | - | GTGACCTATGCACCAGACGTGCTTAAATTGATTGTATGATATTTTTCTTCCCTATTCAAAGATCGGAAGAGCGGTTTCAG    |
| chr5  | 179666874 | 179666913 | MAPK9_5622  | - | GTGACCTATGCACCAGACGTAGCTTATTTTATGCTTCTTTTGTACATTTCTTCCAATCCAGATCGGAAGAGCGGTTTCAG    |
| chr5  | 179667981 | 179668020 | MAPK9_5623  | - | GTGACCTATGCACCAGACGTGTTTTGAAAAGATTTATATAGAGAGCCAGGCTTATTTAGATCGGAAGAGCGGTTTCAG      |
| chr5  | 179669523 | 179669562 | MAPK9_5624  | - | GTGACCTATGCACCAGACGTCTTTTTTCTTACTTGTGTTTTGTAATTCAGTGGTGCAGATCGGAAGAGCGGTTTCAG       |
| chr5  | 179674348 | 179674387 | MAPK9_5625  | - | GTGACCTATGCACCAGACGTACCTGACCCACTCTTACACGAGCGCTCACAGGCAAAAAGATCGGAAGAGCGGTTTCAG      |
| chr5  | 179674389 | 179674428 | MAPK9_5626  | - | GTGACCTATGCACCAGACGTCCGCGACCTTGGCCGCCCATGCTTCTTAAATGCCTCAGGAGATCGGAAGAGCGGTTTCAG    |

|       |           |           |             |   |                                                                                     |
|-------|-----------|-----------|-------------|---|-------------------------------------------------------------------------------------|
| chr5  | 179674805 | 179674844 | MAPK9_5627  | - | GTGACCTATGCACCAGACGTGACGGGGACCCGGTACTTGGCCATGGAGGCTGGGGTGGGCGAGATCGGAAGAGCGGTTTCAG  |
| chr5  | 179675923 | 179675962 | MAPK9_5628  | - | GTGACCTATGCACCAGACGTCCGGGGCTGGAAGAGGCTGGGATGTTTGAATAATGCCTCAAGATCGGAAGAGCGGTTTCAG   |
| chr5  | 179691731 | 179691770 | MAPK9_5629  | - | GTGACCTATGCACCAGACGTTTTTTATTTCAGTAATGCACTGTACATCAAAGAATGAACATAGATCGGAAGAGCGGTTTCAG  |
| chr5  | 179696230 | 179696269 | MAPK9_5630  | - | GTGACCTATGCACCAGACGTATTATGTTTTGTCTGTGTCTCCATATTGTCAATAATGTAGATCGGAAGAGCGGTTTCAG     |
| chr5  | 179707390 | 179707429 | MAPK9_5631  | - | GTGACCTATGCACCAGACGTCTGTTTTAATAGCGTGGATTGAGTTTTTGCTGTAATAAAAAGATCGGAAGAGCGGTTTCAG   |
| chr2  | 16082137  | 16082176  | MYCN_5632   | - | GTGACCTATGCACCAGACGTCCCGGCCGCTGACTGAGGGCTTCTTCCGCCCGTTCGTTAGATCGGAAGAGCGGTTTCAG     |
| chr2  | 16085565  | 16085604  | MYCN_5633   | - | GTGACCTATGCACCAGACGTGATGTGATGTGAGAACCATTTGAATGAAATAGATCGGAAGAGCGGTTTCAG             |
| chr2  | 16082532  | 16082571  | MYCN_5634   | - | GTGACCTATGCACCAGACGTGCGCGTCCAGCTTCTCGCGGGCGGAGAAAGCCGCTCCACATAGATCGGAAGAGCGGTTTCAG  |
| chr2  | 16085867  | 16085906  | MYCN_5635   | - | GTGACCTATGCACCAGACGTCTCTTGAGCGGACGTGGGACGCTCGCTCTTTATCTTCTAGATCGGAAGAGCGGTTTCAG     |
| chr9  | 134001042 | 134001081 | NUP214_5636 | - | GTGACCTATGCACCAGACGTTCAGTGTGTGGAAGCAGCCAAAGCTGCCTCCACCGCCTTAGATCGGAAGAGCGGTTTCAG    |
| chr9  | 134002861 | 134002900 | NUP214_5637 | - | GTGACCTATGCACCAGACGTGAATCAAACAGAGATCAATTCATAAAGAAAGAAATTAAGATCGGAAGAGCGGTTTCAG      |
| chr9  | 134003669 | 134003708 | NUP214_5638 | - | GTGACCTATGCACCAGACGTAAAAAATACAAAGCAGAAAACGGTATGTTCTAAGCATAAAGATCGGAAGAGCGGTTTCAG    |
| chr9  | 134004616 | 134004655 | NUP214_5639 | - | GTGACCTATGCACCAGACGTAAATATGCAAAAAGTAAATAGTTAACAAATAGTAAATCGAATCGGAAGAGCGGTTTCAG     |
| chr9  | 134006103 | 134006142 | NUP214_5640 | - | GTGACCTATGCACCAGACGTACAGTATTACCAAATGAAAACAAGAAAATGGAGCAAACCAAGATCGGAAGAGCGGTTTCAG   |
| chr9  | 134007933 | 134007972 | NUP214_5641 | - | GTGACCTATGCACCAGACGTGGAGGGGAAAAATAAGTATCAAATGAAACAAATCCTAAGATCGGAAGAGCGGTTTCAG      |
| chr9  | 134008443 | 134008482 | NUP214_5642 | - | GTGACCTATGCACCAGACGTATCTTAATCAGTAGCTCATAAAAATGACAGCAACCAGATAGATCGGAAGAGCGGTTTCAG    |
| chr9  | 134010235 | 134010274 | NUP214_5643 | - | GTGACCTATGCACCAGACGTCAAAGCAGAAAAAATTTCTCATGTGCAATTTTTCTCAGAGATCGGAAGAGCGGTTTCAG     |
| chr9  | 134011277 | 134011316 | NUP214_5644 | - | GTGACCTATGCACCAGACGTAAAAACGAGACCATACGTTCAAATACAGCAATAGTTCTAGATCGGAAGAGCGGTTTCAG     |
| chr9  | 134015886 | 134015925 | NUP214_5645 | - | GTGACCTATGCACCAGACGTAGAAAAACAATAAAAAAACCAAGTGAATTTAAGGGCCTAGATCGGAAGAGCGGTTTCAG     |
| chr9  | 134019617 | 134019656 | NUP214_5646 | - | GTGACCTATGCACCAGACGTAAAAAAGGAAGGAAAATGTTAACACTGTAACAGTGGAGGAGATCGGAAGAGCGGTTTCAG    |
| chr9  | 134021466 | 134021505 | NUP214_5647 | - | GTGACCTATGCACCAGACGTGCAGCCTGAAGGCCTCAGAAGAGCCTGCTAGAAGATTTCTAGATCGGAAGAGCGGTTTCAG   |
| chr9  | 134022827 | 134022866 | NUP214_5648 | - | GTGACCTATGCACCAGACGTAGAAGTCAAGTAAAATAGATGGCATTATTACCTTTATTAGATCGGAAGAGCGGTTTCAG     |
| chr9  | 134025661 | 134025700 | NUP214_5649 | - | GTGACCTATGCACCAGACGTAGGAAAAGTTTAAAACTGCAAGTCAATGCTTCTACAAGAGATCGGAAGAGCGGTTTCAG     |
| chr9  | 134025953 | 134025992 | NUP214_5650 | - | GTGACCTATGCACCAGACGTACAAAGTACGAAACTACTAGTCTGAAGGACAAAACAGTAAAGATCGGAAGAGCGGTTTCAG   |
| chr9  | 134027073 | 134027112 | NUP214_5651 | - | GTGACCTATGCACCAGACGTACAATAATGTGTTGGTACAAAAGTTGTTACGTTCAAATAGATCGGAAGAGCGGTTTCAG     |
| chr9  | 134034720 | 134034759 | NUP214_5652 | - | GTGACCTATGCACCAGACGTAAAATAAAAGGCAAATAACTTGTTTTTCTGATAGTTGGAGATCGGAAGAGCGGTTTCAG     |
| chr9  | 134038328 | 134038367 | NUP214_5653 | - | GTGACCTATGCACCAGACGTCAATGAGAAAAGAATTAACATGAATGGTTCAAGTAAAGGAGATCGGAAGAGCGGTTTCAG    |
| chr9  | 134039207 | 134039246 | NUP214_5654 | - | GTGACCTATGCACCAGACGTACAGCTGTAGATACAGACCACTAGGAGCTGAAAGATCGGAGATCGGAAGAGCGGTTTCAG    |
| chr9  | 134039398 | 134039437 | NUP214_5655 | - | GTGACCTATGCACCAGACGTCCATAAACCCATAAATGATTAAGACTAGTTTTTAAAGATAGATCGGAAGAGCGGTTTCAG    |
| chr9  | 134049392 | 134049431 | NUP214_5656 | - | GTGACCTATGCACCAGACGTCCCAAAACAAAACAAATTTAGACAACCTCAAAGCAAGCCAAAGATCGGAAGAGCGGTTTCAG  |
| chr9  | 134050797 | 134050836 | NUP214_5657 | - | GTGACCTATGCACCAGACGTAAAGAAAATTAAGTGTGAGTGGGTGAGAGAACAGGAAAATAGATCGGAAGAGCGGTTTCAG   |
| chr9  | 134053648 | 134053687 | NUP214_5658 | - | GTGACCTATGCACCAGACGTGAGAGAAGAGAGAACCATATTAATTCAGCAAAGGATAAGATCGGAAGAGCGGTTTCAG      |
| chr9  | 134062626 | 134062665 | NUP214_5659 | - | GTGACCTATGCACCAGACGTACAAAAGCATACTACAGAAAAGGCATGACTAGGTA AAAAGATCGGAAGAGCGGTTTCAG    |
| chr9  | 134064390 | 134064429 | NUP214_5660 | - | GTGACCTATGCACCAGACGTGAAAAGCAAAATGTTTTATGTTAAACCTAACCATTTAGATCGGAAGAGCGGTTTCAG       |
| chr9  | 134070570 | 134070609 | NUP214_5661 | - | GTGACCTATGCACCAGACGTGAAAGAAAGAAAATTA AAAAGGAAACAAAGCCAAATAAGATCGGAAGAGCGGTTTCAG     |
| chr9  | 134072553 | 134072592 | NUP214_5662 | - | GTGACCTATGCACCAGACGTAAAGAAATCAGAAAATGGGTTGGATTTAGCAAAGATGACAGATCGGAAGAGCGGTTTCAG    |
| chr9  | 134076984 | 134077023 | NUP214_5663 | - | GTGACCTATGCACCAGACGTCAAAGAAAACAAAATTAATTTGGATTGGATGAGTCTTTAGATCGGAAGAGCGGTTTCAG     |
| chr9  | 134090549 | 134090588 | NUP214_5664 | - | GTGACCTATGCACCAGACGTAAAGGGTCAAGGAAAGGATAAGGATGAGAGTCTATCGTGAAGATCGGAAGAGCGGTTTCAG   |
| chr9  | 134098115 | 134098154 | NUP214_5665 | - | GTGACCTATGCACCAGACGTGAAGATGTGAGGGAGGTCAGAGGGAGACAAATGTCTTACAGATCGGAAGAGCGGTTTCAG    |
| chr9  | 134103497 | 134103536 | NUP214_5666 | - | GTGACCTATGCACCAGACGTGAGAGGCAAAACAGAAATAGGAGAAAAGGAGGAGGATCGGAAGAGCGGTTTCAG          |
| chr9  | 134105967 | 134106006 | NUP214_5667 | - | GTGACCTATGCACCAGACGTGTGAAAACAGACTGAGGTCAAGTGGGGCCTCTACCCTTAGATCGGAAGAGCGGTTTCAG     |
| chr9  | 134107621 | 134107660 | NUP214_5668 | - | GTGACCTATGCACCAGACGTGAATAAGAGTGAAGTTAAAGCACGCATCCACTCGAAAGACAGATCGGAAGAGCGGTTTCAG   |
| chr9  | 134108791 | 134108830 | NUP214_5669 | - | GTGACCTATGCACCAGACGTGCACAGGACAGTGGTGGAGTCACTGCTCTGTACAGAGCAGATCGGAAGAGCGGTTTCAG     |
| chr9  | 134073003 | 134073042 | NUP214_5670 | - | GTGACCTATGCACCAGACGTAGGGGGCTCCGTGTGCTTCCCTAACCCGGGGGGCGAGTAAAGATCGGAAGAGCGGTTTCAG   |
| chr9  | 134073453 | 134073492 | NUP214_5671 | - | GTGACCTATGCACCAGACGTAAACAGACTCAGAAGTTTGCGGAGGACCGCTGGGAAAGCTGGAGATCGGAAGAGCGGTTTCAG |
| chr9  | 134073903 | 134073942 | NUP214_5672 | - | GTGACCTATGCACCAGACGTGCCAAAGCAGACTGCTGCGGTCTGGCTGCCACTTGCCCAAGATCGGAAGAGCGGTTTCAG    |
| chr11 | 100909797 | 100909836 | PGR_5673    | - | GTGACCTATGCACCAGACGTTTTTCTTTAAAGAATTAATTTTTGTGGTATGCTTTTTGTAGATCGGAAGAGCGGTTTCAG    |
| chr11 | 100912626 | 100912665 | PGR_5674    | - | GTGACCTATGCACCAGACGTGGTTGATCCAGAATATCAATGATTATTCTCTGAATTTCTAGATCGGAAGAGCGGTTTCAG    |
| chr11 | 100920610 | 100920649 | PGR_5675    | - | GTGACCTATGCACCAGACGTCCAAGTAACTAATGCAAGATATCTAGTTTTCTAATTCATAGATCGGAAGAGCGGTTTCAG    |
| chr11 | 100922105 | 100922144 | PGR_5676    | - | GTGACCTATGCACCAGACGTACTTTTTGTTGTTTTGTTATTTAAGTGTACATGTAGGATAGATCGGAAGAGCGGTTTCAG    |
| chr11 | 100933128 | 100933167 | PGR_5677    | - | GTGACCTATGCACCAGACGTTTTTTATATCAGCATGTAATAAAAAATATACTATGTTTGAAGATCGGAAGAGCGGTTTCAG   |
| chr11 | 100962441 | 100962480 | PGR_5678    | - | GTGACCTATGCACCAGACGTGTTTATCATCAATAATACTGTGTAATCTTTATACTATAAGATCGGAAGAGCGGTTTCAG     |
| chr11 | 100996688 | 100996727 | PGR_5679    | - | GTGACCTATGCACCAGACGTTCCTGATCTTTATTATTGGTTTAATTGTAATGGAGAGATCGGAAGAGCGGTTTCAG        |
| chr11 | 100998115 | 100998154 | PGR_5680    | - | GTGACCTATGCACCAGACGTGGGACGGGCACGCCAGCGCTCCGGGAGTAGCGGTTCCAGATCGGAAGAGCGGTTTCAG      |
| chr11 | 100998524 | 100998563 | PGR_5681    | - | GTGACCTATGCACCAGACGTCTCCCGGATTTCCCGTTGGGGCCACC GCCCGCTGCCGAGATCGGAAGAGCGGTTTCAG     |
| chr11 | 100998933 | 100998972 | PGR_5682    | - | GTGACCTATGCACCAGACGTGCGCCAGTCCGCCCTGGTGGAGCAGCGCCGATGGCAGATCGGAAGAGCGGTTTCAG        |
| chr11 | 100999342 | 100999381 | PGR_5683    | - | GTGACCTATGCACCAGACGTTGCCTGTTTTGCCCCGAACCTTCCCGAAGATCCACC GGCTGAGATCGGAAGAGCGGTTTCAG |
| chr22 | 46594231  | 46594270  | PPARA_5684  | - | GTGACCTATGCACCAGACGTGTTGGTGTGTTGTGCCCGCAGCTCCAAGCTACTGGGAGGAGATCGGAAGAGCGGTTTCAG    |

|       |           |           |            |   |                                                                                     |
|-------|-----------|-----------|------------|---|-------------------------------------------------------------------------------------|
| chr22 | 46611020  | 46611059  | PPARA_5685 | - | GTGACCTATGCACCAGACGTAGAGGAGAGACGGATGAATAGTCCAGGCATCACTATCCTGAGATCGGAAGAGCGGTTTCAG   |
| chr22 | 46614110  | 46614149  | PPARA_5686 | - | GTGACCTATGCACCAGACGTAAATACACAGTGGATTTAAAGACCTGGGCCACTGAGAAACCAGATCGGAAGAGCGGTTTCAG  |
| chr22 | 46615659  | 46615698  | PPARA_5687 | - | GTGACCTATGCACCAGACGTGAGGGGGAAACACAGGCATGAGCAGTGAGGTCATGACTGCAGATCGGAAGAGCGGTTTCAG   |
| chr22 | 46627639  | 46627678  | PPARA_5688 | - | GTGACCTATGCACCAGACGTGGACACCAAGTAAGTCAGGTGATGTGGGATGCGCTATGCAGATCGGAAGAGCGGTTTCAG    |
| chr22 | 46630980  | 46631019  | PPARA_5689 | - | GTGACCTATGCACCAGACGTAAAGAAGAGAGAGAGGTTTGTAGTGTATAATCACCCAAGAAAGATCGGAAGAGCGGTTTCAG  |
| chr19 | 54385699  | 54385738  | PRKCG_5690 | - | GTGACCTATGCACCAGACGTAGCTAGCAGGGACAGGATCCTGCCTTTCTTGGGGGAAACAGATCGGAAGAGCGGTTTCAG    |
| chr19 | 54386367  | 54386406  | PRKCG_5691 | - | GTGACCTATGCACCAGACGTGAGGATCCTAGGTCAGTGCAGAAAGGGGTACCTGGACCCAGATCGGAAGAGCGGTTTCAG    |
| chr19 | 54387365  | 54387404  | PRKCG_5692 | - | GTGACCTATGCACCAGACGTAAATCATAGACACACAGCAGCGGAGGCATGGATTAGTCCAGCAGATCGGAAGAGCGGTTTCAG |
| chr19 | 54392842  | 54392881  | PRKCG_5693 | - | GTGACCTATGCACCAGACGTAGAAGACTGGCTTAGGGGGCGTTGGGAGGGTCCAAAACCAGATCGGAAGAGCGGTTTCAG    |
| chr19 | 54393090  | 54393129  | PRKCG_5694 | - | GTGACCTATGCACCAGACGTAAAGCTGCGGGTAGCACCTCAGGCCCGCCCAAGCCAAGAGATCGGAAGAGCGGTTTCAG     |
| chr19 | 54394878  | 54394917  | PRKCG_5695 | - | GTGACCTATGCACCAGACGTAGTGAGGAAGAGTGTGACGGGTTAGAGATCCAGGAAGGGGAGATCGGAAGAGCGGTTTCAG   |
| chr19 | 54395713  | 54395752  | PRKCG_5696 | - | GTGACCTATGCACCAGACGTGTGGGGTGGATGGGGTGCAGAGCCGAGCTCATGGCTCCCCAGATCGGAAGAGCGGTTTCAG   |
| chr19 | 54396192  | 54396231  | PRKCG_5697 | - | GTGACCTATGCACCAGACGTGACCGAGACCAAGCGGCGAGCGGGGATGGGGCACCCATAGATCGGAAGAGCGGTTTCAG     |
| chr19 | 54396566  | 54396605  | PRKCG_5698 | - | GTGACCTATGCACCAGACGTAGAAGAGAGAGTCAAGGTTCCCAAGAGATGCAGGGGATCGAGATCGGAAGAGCGGTTTCAG   |
| chr19 | 54401163  | 54401202  | PRKCG_5699 | - | GTGACCTATGCACCAGACGTGAGAAAGAAAGAGCCAGAGGCAGTTAGACCTTACACAGCGAGATCGGAAGAGCGGTTTCAG   |
| chr19 | 54401644  | 54401683  | PRKCG_5700 | - | GTGACCTATGCACCAGACGTAGTTCCAAAAGGGCCAGTCCATGTTGGGAACCCAGTGGTAAGATCGGAAGAGCGGTTTCAG   |
| chr19 | 54403437  | 54403476  | PRKCG_5701 | - | GTGACCTATGCACCAGACGTGTGCATGGGCTTAGAGGGCGGGATCCATCTACCCAGATAGAGATCGGAAGAGCGGTTTCAG   |
| chr19 | 54403623  | 54403662  | PRKCG_5702 | - | GTGACCTATGCACCAGACGTGGGTGGTGGGGACGTCAAGAGGTCAGTGGCTGGATCTGAGATCGGAAGAGCGGTTTCAG     |
| chr19 | 54403815  | 54403854  | PRKCG_5703 | - | GTGACCTATGCACCAGACGTCAAGGGTGTGGGGCAGGAATTGCAAGAAGTGTGAGTTCAAGATCGGAAGAGCGGTTTCAG    |
| chr19 | 54406277  | 54406316  | PRKCG_5704 | - | GTGACCTATGCACCAGACGTTGGAAGGCAGGAATCATGATGCGTTCCTTAGGAAGCCTAAGATCGGAAGAGCGGTTTCAG    |
| chr19 | 54407839  | 54407878  | PRKCG_5705 | - | GTGACCTATGCACCAGACGTGAGGGGATAGAGAGTCAAGGACATGCCCAACTGCCTTTCAGATCGGAAGAGCGGTTTCAG    |
| chr19 | 54409911  | 54409950  | PRKCG_5706 | - | GTGACCTATGCACCAGACGTGCTGGGGGAGGGAAAGTTAAGCAGCTCCGAGGGCTCCTCGAGATCGGAAGAGCGGTTTCAG   |
| chr1  | 198608355 | 198608394 | PTPRC_5707 | - | GTGACCTATGCACCAGACGTGGAAGTCAGCGTGCCTTAAAGAACAGCATGCGTCCCTTCAGATCGGAAGAGCGGTTTCAG    |
| chr1  | 198661426 | 198661465 | PTPRC_5708 | - | GTGACCTATGCACCAGACGTGAAACAAAATCTCTTAGAAAATTTCAAATTTCCATATAAGATCGGAAGAGCGGTTTCAG     |
| chr1  | 198665791 | 198665830 | PTPRC_5709 | - | GTGACCTATGCACCAGACGTATGGAATAATGGGAGAAGGACAAAATAAATATGTGAATCATAGATCGGAAGAGCGGTTTCAG  |
| chr1  | 198668643 | 198668682 | PTPRC_5710 | - | GTGACCTATGCACCAGACGTAAAGTGAGATCATTACATCAGTCTTCCCCACTGGAGATGAGATCGGAAGAGCGGTTTCAG    |
| chr1  | 198671466 | 198671505 | PTPRC_5711 | - | GTGACCTATGCACCAGACGTAAAGGGCCATCAGCACTGTCACTTGTGTCTGTACGCAAGGAGATCGGAAGAGCGGTTTCAG   |
| chr1  | 198672377 | 198672416 | PTPRC_5712 | - | GTGACCTATGCACCAGACGTATGAATAGAAGAATAAAAGCTAATTAATTCGTTATATTAAGATCGGAAGAGCGGTTTCAG    |
| chr1  | 198673551 | 198673590 | PTPRC_5713 | - | GTGACCTATGCACCAGACGTGAAAAAAAATGAAATATTTAAATTTTGCCTTGAATATAGATCGGAAGAGCGGTTTCAG      |
| chr1  | 198675813 | 198675852 | PTPRC_5714 | - | GTGACCTATGCACCAGACGTATAGAACAATTCAGTGTATTTTTCCAGAATAAATAAACTAGATCGGAAGAGCGGTTTCAG    |
| chr1  | 198677212 | 198677251 | PTPRC_5715 | - | GTGACCTATGCACCAGACGTGATACAGAAATAAACTTGATTAGTATTTCAATGTGTATAGATCGGAAGAGCGGTTTCAG     |
| chr1  | 198678766 | 198678805 | PTPRC_5716 | - | GTGACCTATGCACCAGACGTGAAATATTTTCAATGAATATATCGATGCAATATTCACGCGAGATCGGAAGAGCGGTTTCAG   |
| chr1  | 198682032 | 198682071 | PTPRC_5717 | - | GTGACCTATGCACCAGACGTAAATAAGAATGTTATGTAATATGAAAAATAAGACATGGATAAGATCGGAAGAGCGGTTTCAG  |
| chr1  | 198685761 | 198685800 | PTPRC_5718 | - | GTGACCTATGCACCAGACGTATGTAAAAAAAATAGTAAGTCGTTAAAGTCAGTACTAAGATCGGAAGAGCGGTTTCAG      |
| chr1  | 198687173 | 198687212 | PTPRC_5719 | - | GTGACCTATGCACCAGACGTGAAGAAAGATTTTGTATAAATAAATTAATAGATGCATATGAGATCGGAAGAGCGGTTTCAG   |
| chr1  | 198697419 | 198697458 | PTPRC_5720 | - | GTGACCTATGCACCAGACGTAAATAATACATTAGAGAACGATTGTCAAATAACTTGCTAGATCGGAAGAGCGGTTTCAG     |
| chr1  | 198698216 | 198698255 | PTPRC_5721 | - | GTGACCTATGCACCAGACGTAGGAAAAATAAGTTTCTATATTCTCAAGAAGCACAAAATTAGATCGGAAGAGCGGTTTCAG   |
| chr1  | 198700696 | 198700735 | PTPRC_5722 | - | GTGACCTATGCACCAGACGTATTAAGATTCAACTACTAGTTACATGTGTCTTTCAGGTGGAGATCGGAAGAGCGGTTTCAG   |
| chr1  | 198701379 | 198701418 | PTPRC_5723 | - | GTGACCTATGCACCAGACGTCAACGATTTCTTGGATCACAGCAGATTCAGGAAAAATAATAGATCGGAAGAGCGGTTTCAG   |
| chr1  | 198701559 | 198701598 | PTPRC_5724 | - | GTGACCTATGCACCAGACGTAAAAGAAAAATAAACAGTGAATAATGAAATATCAAGTAAGATCGGAAGAGCGGTTTCAG     |
| chr1  | 198703275 | 198703314 | PTPRC_5725 | - | GTGACCTATGCACCAGACGTACATGCAGAGATATGCTATTTGCTGAACATTCAATTAAGATCGGAAGAGCGGTTTCAG      |
| chr1  | 198703407 | 198703446 | PTPRC_5726 | - | GTGACCTATGCACCAGACGTAAACAAAAGCTGATAAGAAAAATTTCTTAAAAGTGCAGATCGGAAGAGCGGTTTCAG       |
| chr1  | 198710948 | 198710987 | PTPRC_5727 | - | GTGACCTATGCACCAGACGTGATAATATTTCTTTGAGATGATTTTTTAAAGCAAACTAAGATCGGAAGAGCGGTTTCAG     |
| chr1  | 198711311 | 198711350 | PTPRC_5728 | - | GTGACCTATGCACCAGACGTAAAGCAAAAAAAGCAGAGGGCATGATCATGGAAAAAGCTGCAGATCGGAAGAGCGGTTTCAG  |
| chr1  | 198713133 | 198713172 | PTPRC_5729 | - | GTGACCTATGCACCAGACGTAAAGAAACAAATACAGATGTTAACTGATAATCTAGAGTCTAGATCGGAAGAGCGGTTTCAG   |
| chr1  | 198717188 | 198717227 | PTPRC_5730 | - | GTGACCTATGCACCAGACGTAAAACAAAACAGAAAACCTCTTAAATGTAATATTGGAGATCGGAAGAGCGGTTTCAG       |
| chr1  | 198718495 | 198718534 | PTPRC_5731 | - | GTGACCTATGCACCAGACGTAAATCAGTAGTAAGTCTTCTTAAAAAATAAATTTCTAGATCGGAAGAGCGGTTTCAG       |
| chr1  | 198719571 | 198719610 | PTPRC_5732 | - | GTGACCTATGCACCAGACGTAAAAAAGGGTGGGACTTCGTTACTACAGAAGAGAGCTCAAGATCGGAAGAGCGGTTTCAG    |
| chr1  | 198721328 | 198721367 | PTPRC_5733 | - | GTGACCTATGCACCAGACGTGAAGACAATTAACAATTTGTTTCCATTTTGAATATGCAAGATCGGAAGAGCGGTTTCAG     |
| chr1  | 198721673 | 198721712 | PTPRC_5734 | - | GTGACCTATGCACCAGACGTAAATGAAGAGAGCATTAACTGGAGTGAAGTTCAGCTTATTAGATCGGAAGAGCGGTTTCAG   |
| chr1  | 198723348 | 198723387 | PTPRC_5735 | - | GTGACCTATGCACCAGACGTAAAGAAAGATAAAAAATCTTACTTACCAAAAAGGAGATCGGAAGAGCGGTTTCAG         |
| chr1  | 198724985 | 198725024 | PTPRC_5736 | - | GTGACCTATGCACCAGACGTAAATTAAGTGGGAATTAACATGAAGAAATTTGATGTCATTAAAGATCGGAAGAGCGGTTTCAG |
| chr1  | 44010697  | 44010736  | PTPRF_5737 | - | GTGACCTATGCACCAGACGTAGCTCCACAGCCAGCCACAGCCAGGACAATCAACCTGTAAGATCGGAAGAGCGGTTTCAG    |
| chr1  | 44019113  | 44019152  | PTPRF_5738 | - | GTGACCTATGCACCAGACGTTGGAGACCAAGTACCACAGCACAGTCACTATAGGAATAGATCGGAAGAGCGGTTTCAG      |
| chr1  | 44019421  | 44019460  | PTPRF_5739 | - | GTGACCTATGCACCAGACGTACAGACATGGGGTACAGCCCTACTCAGGACACAGGAGCCTAGATCGGAAGAGCGGTTTCAG   |
| chr1  | 44035211  | 44035250  | PTPRF_5740 | - | GTGACCTATGCACCAGACGTACAGCAATGTGTATTAGGGCTGGCTTGCCTGCCCTAGATCGGAAGAGCGGTTTCAG        |
| chr1  | 44044431  | 44044470  | PTPRF_5741 | - | GTGACCTATGCACCAGACGTACGAAGAGGAGGCTCAGGACCGGCCCTGTCAGTGTGGCAGATCGGAAGAGCGGTTTCAG     |
| chr1  | 44054352  | 44054391  | PTPRF_5742 | - | GTGACCTATGCACCAGACGTAGGGAGAGGCACTACAGGCCGGCAGGACACACAGCTAGATCGGAAGAGCGGTTTCAG       |

|       |           |           |            |   |                                                                                     |
|-------|-----------|-----------|------------|---|-------------------------------------------------------------------------------------|
| chr1  | 44056593  | 44056632  | PTPRF_5743 | - | GTGACCTATGCACCAGACGTAGTGGGAAGGCTCAAAGCTGCCCGAGGTCAAGATCCTTAGGAGATCGGAAGAGCGGTTTCAG  |
| chr1  | 44057433  | 44057472  | PTPRF_5744 | - | GTGACCTATGCACCAGACGTCCACACCAGGCAGGTGAGCCTCATCTGCGTGAGGTCAGGGAGATCGGAAGAGCGGTTTCAG   |
| chr1  | 44058078  | 44058117  | PTPRF_5745 | - | GTGACCTATGCACCAGACGTACAGGGAGCACTCACTGACAGCTCTGAGCTCAAAGTCACTCAGATCGGAAGAGCGGTTTCAG  |
| chr1  | 44063369  | 44063408  | PTPRF_5746 | - | GTGACCTATGCACCAGACGTCAAATGGGGGGGAAGCAAGCAGATGGAGGGTGGGGATCACAGATCGGAAGAGCGGTTTCAG   |
| chr1  | 44064341  | 44064380  | PTPRF_5747 | - | GTGACCTATGCACCAGACGTAGGTAGAGAAGGAAGTCAGGCCTGGAGGTATCAACCTAGAGATCGGAAGAGCGGTTTCAG    |
| chr1  | 44067692  | 44067731  | PTPRF_5748 | - | GTGACCTATGCACCAGACGTGAGAGGGGAGAAAGGGAGACAGGATGGTGAAGGACTCTGAGATCGGAAGAGCGGTTTCAG    |
| chr1  | 44069037  | 44069076  | PTPRF_5749 | - | GTGACCTATGCACCAGACGTGAGGGGTTCCGTTCCCATACAAGAAATGCAGGGAGAGGCAGATCGGAAGAGCGGTTTCAG    |
| chr1  | 44069232  | 44069271  | PTPRF_5750 | - | GTGACCTATGCACCAGACGTACGGGCTGGGCTCTGGCGCTGCCTCCTGCTGCCCCACCCAGATCGGAAGAGCGGTTTCAG    |
| chr1  | 44070524  | 44070563  | PTPRF_5751 | - | GTGACCTATGCACCAGACGTATAGAGAGAGTCAGCTCTGCTGGGTATATGAGGTGGGGTGGATCGGAAGAGCGGTTTCAG    |
| chr1  | 44070811  | 44070850  | PTPRF_5752 | - | GTGACCTATGCACCAGACGTCTGGGAGGGGCAATCAATGCCTTTGGGTGAGGTTCCCTACCAGATCGGAAGAGCGGTTTCAG  |
| chr1  | 44071150  | 44071189  | PTPRF_5753 | - | GTGACCTATGCACCAGACGTAGGGCAGGAATCAGGACTGTCACTGCTGTTACCTCCAGCAGATCGGAAGAGCGGTTTCAG    |
| chr1  | 44071861  | 44071900  | PTPRF_5754 | - | GTGACCTATGCACCAGACGTAGACATGGGGTCCATGAGGGCCTTGGAGCATGCCGCCAGATCGGAAGAGCGGTTTCAG      |
| chr1  | 44072435  | 44072474  | PTPRF_5755 | - | GTGACCTATGCACCAGACGTGTGGAGAACAGCAGGCTGTGAGCTCAGCGTGAGAACCCCCAGATCGGAAGAGCGGTTTCAG   |
| chr1  | 44075004  | 44075043  | PTPRF_5756 | - | GTGACCTATGCACCAGACGTAGAAGGGAGGCTGGTGAACCTGAGGTCCAGGCTGAGACAGATCGGAAGAGCGGTTTCAG     |
| chr1  | 44079239  | 44079278  | PTPRF_5757 | - | GTGACCTATGCACCAGACGTTAGGGCATAACAGGCAGCATTAGTGTGAGGCTTGGAGCAGATCGGAAGAGCGGTTTCAG     |
| chr1  | 44083066  | 44083105  | PTPRF_5758 | - | GTGACCTATGCACCAGACGTTGGAGAAAGCGGGTGGGGTGGGGTAAAGGCCAAGTTGACAGATCGGAAGAGCGGTTTCAG    |
| chr1  | 44083357  | 44083396  | PTPRF_5759 | - | GTGACCTATGCACCAGACGTGAAAGGAGGTGGGAGGGCACTTACTACAGGGTCCCCAGCCAGATCGGAAGAGCGGTTTCAG   |
| chr1  | 44084251  | 44084290  | PTPRF_5760 | - | GTGACCTATGCACCAGACGTATGAGCAGGGCAGGCTGAGGAAAGCCACAGGCTCAGACGAGATCGGAAGAGCGGTTTCAG    |
| chr1  | 44084669  | 44084708  | PTPRF_5761 | - | GTGACCTATGCACCAGACGTAAGTGGGGACATACTGGCGACTAGGAGCCTACCTGCCATAAGATCGGAAGAGCGGTTTCAG   |
| chr1  | 44084909  | 44084948  | PTPRF_5762 | - | GTGACCTATGCACCAGACGTGGGGCTCAGCTTGGGACAGGGCAGCCCCACCTCCACCCAGATCGGAAGAGCGGTTTCAG     |
| chr1  | 44085301  | 44085340  | PTPRF_5763 | - | GTGACCTATGCACCAGACGTGACAGGATTGGTCAGGCCAGGCTTCCTGTGGGGTGGGGGAGATCGGAAGAGCGGTTTCAG    |
| chr1  | 44085716  | 44085755  | PTPRF_5764 | - | GTGACCTATGCACCAGACGTATAAGACTGGACATGCTGGAGGTGCTGCCCTTAGAGAGATCGGAAGAGCGGTTTCAG       |
| chr1  | 44086075  | 44086114  | PTPRF_5765 | - | GTGACCTATGCACCAGACGTAGGGTCGGGCCCCATAATCAGTGAGAGGAATAGGGGAGAGATCGGAAGAGCGGTTTCAG     |
| chr1  | 44086459  | 44086498  | PTPRF_5766 | - | GTGACCTATGCACCAGACGTGGGTGGGGTACATTAGAATTGCTGCCCTTAGCCAGCCAGATCGGAAGAGCGGTTTCAG      |
| chr1  | 44086718  | 44086757  | PTPRF_5767 | - | GTGACCTATGCACCAGACGTACACAGTTGGGTGACAGGCTCTGCTTGCCTCATGAGTGGAGATCGGAAGAGCGGTTTCAG    |
| chr1  | 44087556  | 44087595  | PTPRF_5768 | - | GTGACCTATGCACCAGACGTAGGGGGCTGGTCAGTGTGGTGCGCCAGTGGACACCCCCAGATCGGAAGAGCGGTTTCAG     |
| chr1  | 44056884  | 44056923  | PTPRF_5769 | - | GTGACCTATGCACCAGACGTTTCTCCCGTGCCTGCCCGACTGCCTGCTGGCGGCCCTTAGATCGGAAGAGCGGTTTCAG     |
| chr1  | 44069521  | 44069560  | PTPRF_5770 | - | GTGACCTATGCACCAGACGTCCCTCGGGGCTCCTGATCTCCTTCTCGAACTCCTCACCCAAAGATCGGAAGAGCGGTTTCAG  |
| chr3  | 12625963  | 12626002  | RAF1_5771  | - | GTGACCTATGCACCAGACGTACTCTGCTTCCAGTCCAGGGGAGGAGAAGCCAAAGATCGGAAGAGCGGTTTCAG          |
| chr3  | 12626296  | 12626335  | RAF1_5772  | - | GTGACCTATGCACCAGACGTGGGCTGCTAGAATTGTGATTAAGCATTGGGTTGGTTCTGTAAGATCGGAAGAGCGGTTTCAG  |
| chr3  | 12626571  | 12626610  | RAF1_5773  | - | GTGACCTATGCACCAGACGTGCTGGTGCGAAAGGACCCAACTCGTGGGAGCCCCTGGGCCAGATCGGAAGAGCGGTTTCAG   |
| chr3  | 12627130  | 12627169  | RAF1_5774  | - | GTGACCTATGCACCAGACGTGGGCTCCCACACAGCAGTCTCTGGTATAGGGCAAAGGAATAGATCGGAAGAGCGGTTTCAG   |
| chr3  | 12629040  | 12629079  | RAF1_5775  | - | GTGACCTATGCACCAGACGTGTTGTTGAGTTCAATTTGACTGCTCGGTTCTAAATTTAGGGAGATCGGAAGAGCGGTTTCAG  |
| chr3  | 12632247  | 12632286  | RAF1_5776  | - | GTGACCTATGCACCAGACGTGGTCTGATGCCTCTCTGGACCCAGGCATCAAATTTGCCAGATCGGAAGAGCGGTTTCAG     |
| chr3  | 12633157  | 12633196  | RAF1_5777  | - | GTGACCTATGCACCAGACGTAGCTGGCGTCCAGTCCCTCTGGAGTCTGGAGTGGGGAGAGATCGGAAGAGCGGTTTCAG     |
| chr3  | 12641140  | 12641179  | RAF1_5778  | - | GTGACCTATGCACCAGACGTGGCCCTCCCTTTACTAACTGCAGGGCTTTGGTGTGAAGTCAAGATCGGAAGAGCGGTTTCAG  |
| chr3  | 12641601  | 12641640  | RAF1_5779  | - | GTGACCTATGCACCAGACGTACAACAGTACCTCCTGCCAATTAGGGTTCAGTAAGAAAAAAGATCGGAAGAGCGGTTTCAG   |
| chr3  | 12641837  | 12641876  | RAF1_5780  | - | GTGACCTATGCACCAGACGTATAGTCATTTAGCCAAATAATGGGCTTTTTTTCTTTATAGATCGGAAGAGCGGTTTCAG     |
| chr3  | 12645585  | 12645624  | RAF1_5781  | - | GTGACCTATGCACCAGACGTACCTTGGGGGTGGTAAATGTCAAGTCAATTAATGGGGTGGAGAGATCGGAAGAGCGGTTTCAG |
| chr3  | 12647650  | 12647689  | RAF1_5782  | - | GTGACCTATGCACCAGACGTACCTATAGCTTTTTCTTTAGAAAGTATTTGGGGTGGTGGAGATCGGAAGAGCGGTTTCAG    |
| chr3  | 12650215  | 12650254  | RAF1_5783  | - | GTGACCTATGCACCAGACGTGTTCTTTTTCTAAAGGAAGATAGGGATGAGGAGTATACATAGATCGGAAGAGCGGTTTCAG   |
| chr3  | 12650682  | 12650721  | RAF1_5784  | - | GTGACCTATGCACCAGACGTGATCTCTTCTTTCTGGCATGTTGAGGGCTTTGCCAGGCAGATCGGAAGAGCGGTTTCAG     |
| chr3  | 12653399  | 12653438  | RAF1_5785  | - | GTGACCTATGCACCAGACGTAAAGTCAATTGACTTCTTACAGACTAGTAAGGATCTTCAAGATCGGAAGAGCGGTTTCAG    |
| chr3  | 12659964  | 12660003  | RAF1_5786  | - | GTGACCTATGCACCAGACGTATTCTACTTAGGAAATTTAGCTATTTATCTGCTGTGGAGAGATCGGAAGAGCGGTTTCAG    |
| chr7  | 128828943 | 128828982 | SMO_5787   | - | GTGACCTATGCACCAGACGTGCCAACTCAGCAAAAGCCCGGCCGCCCCCGCTGCTCCTCAGATCGGAAGAGCGGTTTCAG    |
| chr7  | 128843175 | 128843214 | SMO_5788   | - | GTGACCTATGCACCAGACGTCAACAGCATTGCAAGTGAAGGCCCTCCTACTCTGACCCAAAGATCGGAAGAGCGGTTTCAG   |
| chr7  | 128844994 | 128845033 | SMO_5789   | - | GTGACCTATGCACCAGACGTGGATGGGAAAAGACGGTGTCAAGGCAGCTCAGGGACGAGCAGATCGGAAGAGCGGTTTCAG   |
| chr7  | 128845401 | 128845440 | SMO_5790   | - | GTGACCTATGCACCAGACGTGAAGTGGGCCATTCTGTGAGGTTAGGGTTATTCTGCTGACAGATCGGAAGAGCGGTTTCAG   |
| chr7  | 128845941 | 128845980 | SMO_5791   | - | GTGACCTATGCACCAGACGTAGGTGAGGTGTCACTTGGAGCGGCTACTCTGTACTCCCTCAGATCGGAAGAGCGGTTTCAG   |
| chr7  | 128846255 | 128846294 | SMO_5792   | - | GTGACCTATGCACCAGACGTAAGGGGTGGGACAGAAGGTGGGTTACTGGCCCCCTCCCTCAGATCGGAAGAGCGGTTTCAG   |
| chr7  | 128848550 | 128848589 | SMO_5793   | - | GTGACCTATGCACCAGACGTGGGGACCTCAGACATTAGCAGGCTGAGGCTGCCCTGCTAGATCGGAAGAGCGGTTTCAG     |
| chr7  | 128849080 | 128849119 | SMO_5794   | - | GTGACCTATGCACCAGACGTGAGGGCAGGACAGGACTTACCAAGCCAGTCCCCGACAGCATCGGAAGAGCGGTTTCAG      |
| chr7  | 128850756 | 128850795 | SMO_5795   | - | GTGACCTATGCACCAGACGTAAGGGATAGGGAAGGAGCGTGAAGAAGCTGCCACTTCCCAAGATCGGAAGAGCGGTTTCAG   |
| chr7  | 128851427 | 128851466 | SMO_5796   | - | GTGACCTATGCACCAGACGTGGAAGGAAGGAAAGGAGAAGGAATAGTACTTCCCGGTTCCAGATCGGAAGAGCGGTTTCAG   |
| chr7  | 128851815 | 128851854 | SMO_5797   | - | GTGACCTATGCACCAGACGTGAGAGACAACACAGCCTGGGGCCTGGCTGTGCCATGACAGATCGGAAGAGCGGTTTCAG     |
| chr10 | 104263860 | 104263899 | SUFU_5798  | - | GTGACCTATGCACCAGACGTAGGGCAGGCCTGGGGAACTGGAGAGGGCAAACGACGGAGATCGGAAGAGCGGTTTCAG      |
| chr10 | 104268876 | 104268915 | SUFU_5799  | - | GTGACCTATGCACCAGACGTAAAAACAGGGGTTAGTGTAAGCCTGAAATCAGACAAAGATCGGAAGAGCGGTTTCAG       |
| chr10 | 104309677 | 104309716 | SUFU_5800  | - | GTGACCTATGCACCAGACGTTAAAAAGCAAGTGTTTAAGCTCAATTACCTTAGGAAAAAAGATCGGAAGAGCGGTTTCAG    |

|       |           |           |            |   |                                                                                            |
|-------|-----------|-----------|------------|---|--------------------------------------------------------------------------------------------|
| chr10 | 104352289 | 104352328 | SUFU_5801  | - | GTGACCTATGCACCAGACGTGATACAAGGATCCTCATTGTTCAAGGCCCCAGATCCAGGCAGATCGGAAGAGCGGTTTCAG          |
| chr10 | 104353343 | 104353382 | SUFU_5802  | - | GTGACCTATGCACCAGACGTGGATAGAAAGCCATTGTGTGTTAATGGCCACCCCCACCAGATCGGAAGAGCGGTTTCAG            |
| chr10 | 104353700 | 104353739 | SUFU_5803  | - | GTGACCTATGCACCAGACGTGGAAAGGGGATACAATGGTAACTGAGGGTCTGGGGCTGATAGATCGGAAGAGCGGTTTCAG          |
| chr10 | 104356847 | 104356886 | SUFU_5804  | - | GTGACCTATGCACCAGACGTAGAACCAAAGGCCAGAGTCTTTTCAGAGAACTGGTGACCAGATCGGAAGAGCGGTTTCAG           |
| chr10 | 104359140 | 104359179 | SUFU_5805  | - | GTGACCTATGCACCAGACGTACCATAAGTTGCCAGTGGCCCACTGGGCTCCAGCAATAGATCGGAAGAGCGGTTTCAG             |
| chr10 | 104374975 | 104375014 | SUFU_5806  | - | GTGACCTATGCACCAGACGTAGCACAGGAAAGGTTCCGGACAAGGTGAAAGCTCAGGGAGATCGGAAGAGCGGTTTCAG            |
| chr10 | 104376997 | 104377036 | SUFU_5807  | - | GTGACCTATGCACCAGACGTGAACATGGAGACAGTGAGGAGCTGGGCTTGGAAACACTTCAGATCGGAAGAGCGGTTTCAG          |
| chr10 | 104386882 | 104386921 | SUFU_5808  | - | GTGACCTATGCACCAGACGTACAAGGCAGGCTTTTATTATTATTTTAAATGTATGATCTAGATCGGAAGAGCGGTTTCAG           |
| chr10 | 104389773 | 104389812 | SUFU_5809  | - | GTGACCTATGCACCAGACGTAGCAAGCACAGACCAGGAGTGTGAGTGGTTAGCAGAATACAGATCGGAAGAGCGGTTTCAG          |
| chr1  | 47685342  | 47685381  | TAL1_5810  | - | GTGACCTATGCACCAGACGTCCACCAGGATCAGCCAGGAGGGCGTCTTAGGCTGCTGGGAGATCGGAAGAGCGGTTTCAG           |
| chr1  | 47689626  | 47689665  | TAL1_5811  | - | GTGACCTATGCACCAGACGTCCCACCCACCCTGTGTACCTGCCCTCACGCTGGTTAGAGAGATCGGAAGAGCGGTTTCAG           |
| chr14 | 76425480  | 76425519  | TGFB3_5812 | - | GTGACCTATGCACCAGACGTGGCAGAGAGAGGGGAGAGAGAACCCACTGCCTGACTAGATCGGAAGAGCGGTTTCAG              |
| chr14 | 76427216  | 76427255  | TGFB3_5813 | - | GTGACCTATGCACCAGACGTGGCTGGCTGATGCTGAGGCATGGGGCTGACCGACACAGATCGGAAGAGCGGTTTCAG              |
| chr14 | 76429609  | 76429648  | TGFB3_5814 | - | GTGACCTATGCACCAGACGTGCCACATGGGAACCAACTCTACTGCCTGCCTACTGCCAGATCGGAAGAGCGGTTTCAG             |
| chr14 | 76431881  | 76431920  | TGFB3_5815 | - | GTGACCTATGCACCAGACGTGAATGTGTATGGTAGGATGGGTGAGTGGGGGGGAAGTTAAAGATCGGAAGAGCGGTTTCAG          |
| chr14 | 76437419  | 76437458  | TGFB3_5816 | - | GTGACCTATGCACCAGACGTCTTCAGATAAGCATTTTCAGAAATGAACCTCAGGTCCTTAAAGATCGGAAGAGCGGTTTCAG         |
| chr14 | 76437848  | 76437887  | TGFB3_5817 | - | GTGACCTATGCACCAGACGTCTCAGAGCAAAACCCAGCGGAAAGCTGGTTCCTAGATCGGAAGAGCGGTTTCAG                 |
| chr14 | 76446835  | 76446874  | TGFB3_5818 | - | GTGACCTATGCACCAGACGTATTCTCGCTGGGGTGTCTGCTCTGGAGGGTCTGAAGTGGAAAGATCGGAAGAGCGGTTTCAG         |
| chr17 | 76170790  | 76170829  | TK1_5819   | - | GTGACCTATGCACCAGACGTAGGGCCGCCCGCTCCCTTCTGCCACTGCCCTACTGGAAGATCGGAAGAGCGGTTTCAG             |
| chr17 | 76171081  | 76171120  | TK1_5820   | - | GTGACCTATGCACCAGACGTCTGCCTTCCTGCAGGCCGGCGGGGTGGGGGTATGGCTCTAGATCGGAAGAGCGGTTTCAG           |
| chr17 | 76171560  | 76171599  | TK1_5821   | - | GTGACCTATGCACCAGACGTGTATCCAGTCTGAGACTGGGATTGAGGAGGGCAAGAGGCAGATCGGAAGAGCGGTTTCAG           |
| chr17 | 76178620  | 76178659  | TK1_5822   | - | GTGACCTATGCACCAGACGTGTGTCTTGGCATCACTTCTCCTGCCAGTTCCTCGCTCTGTGATCGGAAGAGCGGTTTCAG           |
| chr17 | 76181086  | 76181125  | TK1_5823   | - | GTGACCTATGCACCAGACGTGCCCCCTGCAGTCTTCCAGTGCCAGTGAAATCACAAAGGCACAGATCGGAAGAGCGGTTTCAG        |
| chr17 | 76182818  | 76182857  | TK1_5824   | - | GTGACCTATGCACCAGACGTGCCCGGCTGGGGTGGAGTCTCCTCTTCTCCGGGACAGATCGGAAGAGCGGTTTCAG               |
| chr17 | 76182960  | 76182999  | TK1_5825   | - | GTGACCTATGCACCAGACGTGAGCCCTGCCGCTGGGCTGGGGATGAGGTGGTCTGGTATAGATCGGAAGAGCGGTTTCAG           |
| chr12 | 48238479  | 48238518  | VDR_5826   | - | GTGACCTATGCACCAGACGTCTGTGGCGGTGCCTGGGTGGGGCTGCTCCTCCAGGGCCACAGATCGGAAGAGCGGTTTCAG          |
| chr12 | 48240068  | 48240107  | VDR_5827   | - | GTGACCTATGCACCAGACGTAGGCAGGGAGGAGCTCAGGGACCTGGGGAGCGGGGAGATAGATCGGAAGAGCGGTTTCAG           |
| chr12 | 48240390  | 48240429  | VDR_5828   | - | GTGACCTATGCACCAGACGTACTCCACCTCCTGGGGAGCTTTTTTCAGTCCCAGATTCAGATCGGAAGAGCGGTTTCAG            |
| chr12 | 48249363  | 48249402  | VDR_5829   | - | GTGACCTATGCACCAGACGTTCGCAATCTCTGGGGAAGCAGATCAGATCTCAGATCGGAAGAGCGGTTTCAG                   |
| chr12 | 48250862  | 48250901  | VDR_5830   | - | GTGACCTATGCACCAGACGTCTTCAGTCTCCATAGATAAGTAGAGCGGGGCGCAGGAGTAGATCGGAAGAGCGGTTTCAG           |
| chr12 | 48251237  | 48251276  | VDR_5831   | - | GTGACCTATGCACCAGACGTCTGCTGGGAGGATGAGCCGGTCCAGAGGAGAAGCACTAGTAGATCGGAAGAGCGGTTTCAG          |
| chr12 | 48258780  | 48258819  | VDR_5832   | - | GTGACCTATGCACCAGACGTAGGGGCTGGGCAGGGTTTTGGGCCTGAAGTGGAGTCAAGGAGATCGGAAGAGCGGTTTCAG          |
| chr12 | 48272701  | 48272740  | VDR_5833   | - | GTGACCTATGCACCAGACGTCTCCAGGCTCTCCCAAGTGGAAAGGGAGGGAGAAGAAGCAGATCGGAAGAGCGGTTTCAG           |
| chr4  | 89013336  | 89013375  | ABCG2_5834 | - | GTGACCTATGCACCAGACGTAAATTCAGTATTATTCCTCACATAAAAAAGAAGCACTTAGATCGGAAGAGCGGTTTCAG            |
| chr4  | 89015679  | 89015718  | ABCG2_5835 | - | GTGACCTATGCACCAGACGTAAATGGTGTTCGAAATACTCAAATGGCTTTTTGTACTACCATGGTGTGAAGATCGGAAGAGCGGTTTCAG |
| chr4  | 89016622  | 89016661  | ABCG2_5836 | - | GTGACCTATGCACCAGACGTCTTGTCTGTCACTGTGACTGCATTCCCAAGCTAGGAACAAGATCGGAAGAGCGGTTTCAG           |
| chr4  | 89018555  | 89018594  | ABCG2_5837 | - | GTGACCTATGCACCAGACGTACTGTGTTTGTCTGATAAGGAATGTTTTTTTCTTCATAGATCGGAAGAGCGGTTTCAG             |
| chr4  | 89020426  | 89020465  | ABCG2_5838 | - | GTGACCTATGCACCAGACGTAAACAAAACAAAAGGACATGCTTTTGTAGTCTTGCCTATGGAGATCGGAAGAGCGGTTTCAG         |
| chr4  | 89022332  | 89022371  | ABCG2_5839 | - | GTGACCTATGCACCAGACGTCTTTGTTCTGGGAACGGGGCTGTCCAGCAGCAGGGGCTATAGATCGGAAGAGCGGTTTCAG          |
| chr4  | 89028286  | 89028325  | ABCG2_5840 | - | GTGACCTATGCACCAGACGTGGATCTTGATTTTCAGAAAATGCTGTACTTTCTTCAAAGATCGGAAGAGCGGTTTCAG             |
| chr4  | 89034405  | 89034444  | ABCG2_5841 | - | GTGACCTATGCACCAGACGTGTTCTTTTGTGAAATCTCAAATGGGAACAATGTGGTCTGAGATCGGAAGAGCGGTTTCAG           |
| chr4  | 89036059  | 89036098  | ABCG2_5842 | - | GTGACCTATGCACCAGACGTCTGTACAGTCCCAGATTTTTGCCTAATTGAATTGGCTGAAGATCGGAAGAGCGGTTTCAG           |
| chr4  | 89039211  | 89039250  | ABCG2_5843 | - | GTGACCTATGCACCAGACGTCTTTTTATGCTGTAAAATGCTTCATTAATAGAATCCTGAAGATCGGAAGAGCGGTTTCAG           |
| chr4  | 89052163  | 89052202  | ABCG2_5844 | - | GTGACCTATGCACCAGACGTAAAACCTGAAAGCATCATGATCAGCATAAGTAGGACTTTCAGATCGGAAGAGCGGTTTCAG          |
| chr4  | 89052905  | 89052944  | ABCG2_5845 | - | GTGACCTATGCACCAGACGTGGGGTTTGCATTTTCTGTTTCTGTTTCTATATGGGTAGATCGGAAGAGCGGTTTCAG              |
| chr4  | 89053678  | 89053717  | ABCG2_5846 | - | GTGACCTATGCACCAGACGTGAGAGTATAAGTAAGCGTTTTCTGTGACTTTTAAATGTCAGATCGGAAGAGCGGTTTCAG           |
| chr4  | 89060895  | 89060934  | ABCG2_5847 | - | GTGACCTATGCACCAGACGTGAACCTGTAAAAAGACAGCTTTTTAATTTACCTACAGTGAAGATCGGAAGAGCGGTTTCAG          |
| chr5  | 131289877 | 131289916 | ACSL6_5848 | - | GTGACCTATGCACCAGACGTAAAGTCTTCTCAGTGAATGAAGTGTCTAGCAATATTATAAGATCGGAAGAGCGGTTTCAG           |
| chr5  | 131295179 | 131295218 | ACSL6_5849 | - | GTGACCTATGCACCAGACGTCTTCCCACTACTCTGTACAACCTTCAGGCAGTGTGAAAGATCGGAAGAGCGGTTTCAG             |
| chr5  | 131296163 | 131296202 | ACSL6_5850 | - | GTGACCTATGCACCAGACGTGGGGCTGTCTCCTGAAAGTTACTGAATGTTTTATGGTAAGATCGGAAGAGCGGTTTCAG            |
| chr5  | 131298178 | 131298217 | ACSL6_5851 | - | GTGACCTATGCACCAGACGTTAGGCTTAGCCCTCCCACTATCTGGGCATGCTGAAAAGATCGGAAGAGCGGTTTCAG              |
| chr5  | 131302059 | 131302098 | ACSL6_5852 | - | GTGACCTATGCACCAGACGTTTGGAAACCGAGCTCCAAACATTTGGCAGTGGGAGGTAGATCGGAAGAGCGGTTTCAG             |
| chr5  | 131303583 | 131303622 | ACSL6_5853 | - | GTGACCTATGCACCAGACGTATTTAGCCATTCTGCTGTGGCTGTCTACATGTAGTGAGTAGATCGGAAGAGCGGTTTCAG           |
| chr5  | 131305771 | 131305810 | ACSL6_5854 | - | GTGACCTATGCACCAGACGTCTAGAGATATAGGACTGGCTCGCGAGGCAGTGTGGAGTAAAGATCGGAAGAGCGGTTTCAG          |
| chr5  | 131307193 | 131307232 | ACSL6_5855 | - | GTGACCTATGCACCAGACGTGTGTGTCTCCCTTGGAAACAGCAGGAAGTTCTGTAGGGAGATCGGAAGAGCGGTTTCAG            |
| chr5  | 131308367 | 131308406 | ACSL6_5856 | - | GTGACCTATGCACCAGACGTGAACAAGTGATTATAGATGACACCTAAGTATCCAACGGGAGATCGGAAGAGCGGTTTCAG           |
| chr5  | 131308909 | 131308948 | ACSL6_5857 | - | GTGACCTATGCACCAGACGTCCAGGAGTCTCAGCCAGGCTGAGGGGCTGCATATTTGCTAGATCGGAAGAGCGGTTTCAG           |
| chr5  | 131310401 | 131310440 | ACSL6_5858 | - | GTGACCTATGCACCAGACGTGGCATCAGGGAGCCACTCTGTGCCTAGAACCATAACCAGATCGGAAGAGCGGTTTCAG             |

|       |           |           |             |   |                                                                                            |
|-------|-----------|-----------|-------------|---|--------------------------------------------------------------------------------------------|
| chr5  | 131310536 | 131310575 | ACSL6_5859  | - | GTGACCTATGCACCAGACGTACCTGACTGACCGGGCCTTGCTGGGCTCCTCTTTTTAGATCGGAAGAGCGGTTTCAG              |
| chr5  | 131312291 | 131312330 | ACSL6_5860  | - | GTGACCTATGCACCAGACGTTAGCATTACTGTTGCAGGTGTCTCTTGAGGACAACCTCAAAGATCGGAAGAGCGGTTTCAG          |
| chr5  | 131321050 | 131321089 | ACSL6_5861  | - | GTGACCTATGCACCAGACGTGCACGCAGATCCCCAGCCATGGCTACCTGCACCCTTCCTAGATCGGAAGAGCGGTTTCAG           |
| chr5  | 131322465 | 131322504 | ACSL6_5862  | - | GTGACCTATGCACCAGACGTTACCTGCAGGTCTTTATTGAGCGAGATGGCGTGCAGGGCAGATCGGAAGAGCGGTTTCAG           |
| chr5  | 131323691 | 131323730 | ACSL6_5863  | - | GTGACCTATGCACCAGACGTGCTTCTGGGCGGTTTGCTGGGCTACTGCTGGCTGGTACCAGATCGGAAGAGCGGTTTCAG           |
| chr5  | 131324448 | 131324487 | ACSL6_5864  | - | GTGACCTATGCACCAGACGTTGCCACCCACCTTGCCACTGGCAACTGGTCCCCAGCCTCAGATCGGAAGAGCGGTTTCAG           |
| chr5  | 131325050 | 131325089 | ACSL6_5865  | - | GTGACCTATGCACCAGACGTGTCTGACTGTTAGCTGGTTTTAGAGGGATTCTGGGGTAGGGTTGAGATCGGAAGAGCGGTTTCAG      |
| chr5  | 131325743 | 131325782 | ACSL6_5866  | - | GTGACCTATGCACCAGACGTACAGGACAGGCCACCCTGGCCACCATTAGATCTGGCAAGATCGGAAGAGCGGTTTCAG             |
| chr5  | 131326496 | 131326535 | ACSL6_5867  | - | GTGACCTATGCACCAGACGTTTGTGGGGGGGGTGTGGAGGGGCTGTGTGGCAGGGTGGAGATCGGAAGAGCGGTTTCAG            |
| chr5  | 131329674 | 131329713 | ACSL6_5868  | - | GTGACCTATGCACCAGACGTAGGAGACGTTCCACTGCGGAAAGTAGGGGGCAGAGGACAAGATCGGAAGAGCGGTTTCAG           |
| chr5  | 131347148 | 131347187 | ACSL6_5869  | - | GTGACCTATGCACCAGACGTGTCTGTCCGCTCCCGGACTCCCATCTCCCGCAGGCTATAGATCGGAAGAGCGGTTTCAG            |
| chr20 | 43248425  | 43248464  | ADA_5870    | - | GTGACCTATGCACCAGACGTCTCCAAGCTTCACTGTGGAGTCAACCCAACTCTGTGATCGGAAGAGCGGTTTCAG                |
| chr20 | 43248890  | 43248929  | ADA_5871    | - | GTGACCTATGCACCAGACGTGTCTGGGCTTCTGGGCTTCTGGGCTGCTGCTGGCCCTGCTGCCCCAGTGAGATCGGAAGAGCGGTTTCAG |
| chr20 | 43249609  | 43249648  | ADA_5872    | - | GTGACCTATGCACCAGACGTGTGAGCCATACTGGCCTTGACTCGGGTTTGGGAGTATGGTAGATCGGAAGAGCGGTTTCAG          |
| chr20 | 43251179  | 43251218  | ADA_5873    | - | GTGACCTATGCACCAGACGTTTCCCTGGGCTGTTCAATTTTGTCCAGGAAGGCCAAAAGATCGGAAGAGCGGTTTCAG             |
| chr20 | 43251420  | 43251459  | ADA_5874    | - | GTGACCTATGCACCAGACGTACGGGAGTGGGGAGGAACCATCCCCGGCTGTCCAACCTCAGATCGGAAGAGCGGTTTCAG           |
| chr20 | 43251598  | 43251637  | ADA_5875    | - | GTGACCTATGCACCAGACGTGGGCTGGCCATGGGGTCCCTCCTCCTGCTCCTCCATAAGATCGGAAGAGCGGTTTCAG             |
| chr20 | 43252793  | 43252832  | ADA_5876    | - | GTGACCTATGCACCAGACGTGTGAGAAGGAATGGAGAGGCTGGCCCTGGGTGAGCTGTCTAGATCGGAAGAGCGGTTTCAG          |
| chr20 | 43254160  | 43254199  | ADA_5877    | - | GTGACCTATGCACCAGACGTTACCGCCCTGCCAGGGCCGGCTCTCACCTGGCCCTAGATCGGAAGAGCGGTTTCAG               |
| chr20 | 43255047  | 43255086  | ADA_5878    | - | GTGACCTATGCACCAGACGTGGCCTGGAAGGGGCCATGCTGAGGGTGTGGCTGGGAGGCTAGATCGGAAGAGCGGTTTCAG          |
| chr20 | 43257638  | 43257677  | ADA_5879    | - | GTGACCTATGCACCAGACGTCCCAACCCACAGGTCTTAGGGCAGCATTGATCCCTATGACAGATCGGAAGAGCGGTTTCAG          |
| chr20 | 43264818  | 43264857  | ADA_5880    | - | GTGACCTATGCACCAGACGTACAGAAGAGCCCTCTCCTCCTGGGATTTGAGTGGGGTCCCAGATCGGAAGAGCGGTTTCAG          |
| chr20 | 43280166  | 43280205  | ADA_5881    | - | GTGACCTATGCACCAGACGTGCGGGGCTCCGGGAGCGGGGTCGGGCGCTGGGCGCCAGATCGGAAGAGCGGTTTCAG              |
| chr9  | 21968252  | 21968291  | CDKN2A_5882 | + | GTGACCTATGCACCAGACGTGACAGAAGAACAGGCGTTAGAAACCTGAGTCAAAGATGAGATCGGAAGAGCGGTTTCAG            |
| chr9  | 21971218  | 21971257  | CDKN2A_5883 | + | GTGACCTATGCACCAGACGTGAACAGAATGGTCAGAGCCAGGGTGGGGCCGGCATGACGAGATCGGAAGAGCGGTTTCAG           |
| chr9  | 21974837  | 21974876  | CDKN2A_5884 | + | GTGACCTATGCACCAGACGTGCCGCCGCTGCCTGCTCCTCCCTCCTCCGACCCGCCAAGATCGGAAGAGCGGTTTCAG             |
| chr7  | 55210141  | 55210180  | EGFR_5885   | + | GTGACCTATGCACCAGACGTTTGAATTTTCTACACAAATAAAATTGGAGAAAATCTAAGTAGATCGGAAGAGCGGTTTCAG          |
| chr7  | 55211192  | 55211231  | EGFR_5886   | + | GTGACCTATGCACCAGACGTGGGATGCCAAGGCTGGGGGTTTATAAATGCAGACAGCAGTAGATCGGAAGAGCGGTTTCAG          |
| chr7  | 55214444  | 55214483  | EGFR_5887   | + | GTGACCTATGCACCAGACGTATACACACTATCTCTGCTCCCTCCTATGGGGACAGATCGGAAGAGCGGTTTCAG                 |
| chr7  | 55219066  | 55219105  | EGFR_5888   | + | GTGACCTATGCACCAGACGTGAACAGCCTACAGCCATGTGTGACCCCTCTCTTCTTCTAGATCGGAAGAGCGGTTTCAG            |
| chr7  | 55220368  | 55220407  | EGFR_5889   | + | GTGACCTATGCACCAGACGTCTCCAGCAGCCTCCCTGGAGCAGGCTGGGGTGCACCCGAGATCGGAAGAGCGGTTTCAG            |
| chr7  | 55221856  | 55221895  | EGFR_5890   | + | GTGACCTATGCACCAGACGTCTGTGGGCTCTAACTGGTACAGCATCCTTGTCCCGCAGATCGGAAGAGCGGTTTCAG              |
| chr7  | 55223650  | 55223689  | EGFR_5891   | + | GTGACCTATGCACCAGACGTGCGCCGTGTGCGGAGCAGGCTGTTCTCGGCTGCTGAGGCAGATCGGAAGAGCGGTTTCAG           |
| chr7  | 55224363  | 55224402  | EGFR_5892   | + | GTGACCTATGCACCAGACGTGGTTGCTGTTGTTATAAAGAAAAAATACTGCCTTTAGATCGGAAGAGCGGTTTCAG               |
| chr7  | 55224536  | 55224575  | EGFR_5893   | + | GTGACCTATGCACCAGACGTAATATACATGAAATGGAATAACAGTGTGTTTAGAAGATCGGAAGAGCGGTTTCAG                |
| chr7  | 55224547  | 55224586  | EGFR_5894   | + | GTGACCTATGCACCAGACGTGAATATAAATGGAAATCAGTGTGTTTAGAGAGAGAATTTAGATCGGAAGAGCGGTTTCAG           |
| chr7  | 55228042  | 55228081  | EGFR_5895   | + | GTGACCTATGCACCAGACGTGCTTCTGTTTAGTTTAGTTAGTTGGTCTAATGGTCTAGATCGGAAGAGCGGTTTCAG              |
| chr7  | 55229335  | 55229374  | EGFR_5896   | + | GTGACCTATGCACCAGACGTTATTTCTTAATCCCTTGGCTTGATCAAAAATAAGGCTCCAGATCGGAAGAGCGGTTTCAG           |
| chr7  | 55231527  | 55231566  | EGFR_5897   | + | GTGACCTATGCACCAGACGTCTTGTCTATCCACGTCATTTTATGGGAAGGGCTTCAAGATCGGAAGAGCGGTTTCAG              |
| chr7  | 55233141  | 55233180  | EGFR_5898   | + | GTGACCTATGCACCAGACGTAGTGAAGGAGAACAGAACATTTCTCCTTGCATAATCAGAGATCGGAAGAGCGGTTTCAG            |
| chr7  | 55236233  | 55236272  | EGFR_5899   | + | GTGACCTATGCACCAGACGTCTGTCTGACTTTAGTCTCCACTCAAACTGCATTTCTTTAGATCGGAAGAGCGGTTTCAG            |
| chr7  | 55238248  | 55238287  | EGFR_5900   | + | GTGACCTATGCACCAGACGTTTACGTTGTTTCCCCCGCTTTTCTTTCTGCCACCCAGATCGGAAGAGCGGTTTCAG               |
| chr7  | 55238917  | 55238956  | EGFR_5901   | + | GTGACCTATGCACCAGACGTACAGCTCTGTGTACATGGACCTCGTCAAAGATGACCACAAGATCGGAAGAGCGGTTTCAG           |
| chr7  | 55240828  | 55240867  | EGFR_5902   | + | GTGACCTATGCACCAGACGTGTCTGCTGGGCTCAGGAGCCCTCGCACCCCGACAGAAAGATCGGAAGAGCGGTTTCAG             |
| chr7  | 55241747  | 55241786  | EGFR_5903   | + | GTGACCTATGCACCAGACGTTGCCACGCTCTGGGCTGGGCGCAGGGCTCTCATGGAGATCGGAAGAGCGGTTTCAG               |
| chr7  | 55242524  | 55242563  | EGFR_5904   | + | GTGACCTATGCACCAGACGTGCTTGTGCTGTGGGGTCCATGGCTCTGAACCTCAGGCCAGATCGGAAGAGCGGTTTCAG            |
| chr7  | 55249182  | 55249221  | EGFR_5905   | + | GTGACCTATGCACCAGACGTAAGGGAGATACGGGGAGGGAGATAAGGAGCCAGGATCTAGATCGGAAGAGCGGTTTCAG            |
| chr7  | 55259578  | 55259617  | EGFR_5906   | + | GTGACCTATGCACCAGACGTGGCTTTAGGTACGCCAGCATTTTCTGACACCAGGGACCAAGATCGGAAGAGCGGTTTCAG           |
| chr7  | 55260545  | 55260584  | EGFR_5907   | + | GTGACCTATGCACCAGACGTATCCTGATGCTAATGAGTTTGTACTGAGGCCAAGCTGGCTAGATCGGAAGAGCGGTTTCAG          |
| chr7  | 55266567  | 55266606  | EGFR_5908   | + | GTGACCTATGCACCAGACGTGGTGGGCTGTGTCCACTGCCTAGCTGAGCCCTGGTGGCTAGATCGGAAGAGCGGTTTCAG           |
| chr7  | 55268117  | 55268156  | EGFR_5909   | + | GTGACCTATGCACCAGACGTGACTGTGCTTCCATTGGGAAGATCCCTTAATGAGCAAGATCGGAAGAGCGGTTTCAG              |
| chr7  | 55269059  | 55269098  | EGFR_5910   | + | GTGACCTATGCACCAGACGTGCTGTCTCTCTTCTCAAGCTGTGTCTACTCATTTGAGATCGGAAGAGCGGTTTCAG               |
| chr7  | 55269486  | 55269525  | EGFR_5911   | + | GTGACCTATGCACCAGACGTACACCTTATAAGCCAGAATTTACAGCTCTCCACTATGGCTAGATCGGAAGAGCGGTTTCAG          |
| chr7  | 55270329  | 55270368  | EGFR_5912   | + | GTGACCTATGCACCAGACGTTGTCTGGAACAGTCTGCTCCTCAACCTCCTGACCCACAGATCGGAAGAGCGGTTTCAG             |
| chr7  | 55273321  | 55273360  | EGFR_5913   | + | GTGACCTATGCACCAGACGTTAGTATGAGCCCTAAAATCCAGACTTTTCTGATACCCAGAGATCGGAAGAGCGGTTTCAG           |
| chr17 | 7573019   | 7573058   | TP53_5914   | + | GTGACCTATGCACCAGACGTACAGAAGCAGGGAGGAGATGACATCAGATGAGTGGAGGAGATCGGAAGAGCGGTTTCAG            |
| chr17 | 7576595   | 7576634   | TP53_5915   | + | GTGACCTATGCACCAGACGTTCAAAGCATGAAACATTTTCTGCTCTTTAAACAATTTAGATCGGAAGAGCGGTTTCAG             |
| chr17 | 7576668   | 7576707   | TP53_5916   | + | GTGACCTATGCACCAGACGTTATATTGGTATAAGTTGGTGTCTCAAGTTAGTTAGTATGATCGGAAGAGCGGTTTCAG             |

|       |           |           |             |   |                                                                                     |
|-------|-----------|-----------|-------------|---|-------------------------------------------------------------------------------------|
| chr17 | 7576937   | 7576976   | TP53_5917   | + | GTGACCTATGCACCAGACGTGGCAAGGAAAGGTGATAAAAGTAATCTGAGGCATAACTGAGATCGGAAGAGCGGTTTCAG    |
| chr17 | 7577166   | 7577205   | TP53_5918   | + | GTGACCTATGCACCAGACGTTAGGAAAAGAGAAGCAAGAGCGCAGTAAGGAAATCAGGTCCAGATCGGAAGAGCGGTTTCAG  |
| chr17 | 7577619   | 7577658   | TP53_5919   | + | GTGACCTATGCACCAGACGTACACAGGCCCAAGATGAGGCCAGTGCGCCTTGGGGAGACCAGATCGGAAGAGCGGTTTCAG   |
| chr17 | 7578300   | 7578339   | TP53_5920   | + | GTGACCTATGCACCAGACGTTGAGGAAATCAGAGGCCCTGGGGACCCTGGGCAACCAGAGATCGGAAGAGCGGTTTCAG     |
| chr17 | 7578565   | 7578604   | TP53_5921   | + | GTGACCTATGCACCAGACGTAGGAAGGAGACAGAGTTGAAAGTCAAGGGCACAAAGTGAACAAGATCGGAAGAGCGGTTTCAG |
| chr17 | 7579732   | 7579771   | TP53_5922   | + | GTGACCTATGCACCAGACGTAGACAGCAAAGTCAAGTCCCATTGGAATTTTCGCTTCCCACAAGATCGGAAGAGCGGTTTCAG |
| chr17 | 7579923   | 7579962   | TP53_5923   | + | GTGACCTATGCACCAGACGTCGGAAGGAGCGTGGCTGCTGCAAGAGGAAAAGTGGGGATAGATCGGAAGAGCGGTTTCAG    |
| chr3  | 178916976 | 178917015 | PIK3CA_5924 | + | GTGACCTATGCACCAGACGTATATCCTATTCTAAAATGCAAATAACCATAAAGCTTAACTAGATCGGAAGAGCGGTTTCAG   |
| chr3  | 178917698 | 178917737 | PIK3CA_5925 | + | GTGACCTATGCACCAGACGTGACTAATCTACTCTAATCATTACTATAGTGCAGTCTTCTAAGATCGGAAGAGCGGTTTCAG   |
| chr3  | 178921588 | 178921627 | PIK3CA_5926 | + | GTGACCTATGCACCAGACGTATGCTGATGCTTATTATTTATAGAAATTTATTTAGATAAAGATCGGAAGAGCGGTTTCAG    |
| chr3  | 178922387 | 178922426 | PIK3CA_5927 | + | GTGACCTATGCACCAGACGTATATGATTTATATTTCCAAAGGTTATATTAGTGTGTTAGCAGATCGGAAGAGCGGTTTCAG   |
| chr3  | 178927499 | 178927538 | PIK3CA_5928 | + | GTGACCTATGCACCAGACGTTCCAGAAACAATTATGTTTACCTTTAAAAAACCCTGATAGATCGGAAGAGCGGTTTCAG     |
| chr3  | 178928137 | 178928176 | PIK3CA_5929 | + | GTGACCTATGCACCAGACGTTATTGTGATAAAATAGATATTTTTTATGGCAGTCAAACCTAGATCGGAAGAGCGGTTTCAG   |
| chr3  | 178928364 | 178928403 | PIK3CA_5930 | + | GTGACCTATGCACCAGACGTTCACTGAGTTTTATTAAGTATCAATTATACTGTGGATTAGATCGGAAGAGCGGTTTCAG     |
| chr3  | 178936133 | 178936172 | PIK3CA_5931 | + | GTGACCTATGCACCAGACGTAAATGGAGATTCTCTGTTTCTTTTCTTTATACAGAAAAGATCGGAAGAGCGGTTTCAG      |
| chr3  | 178937076 | 178937115 | PIK3CA_5932 | + | GTGACCTATGCACCAGACGTGTTTGAGATTACTAGATAACTGTTGTACAAATTTGGTATGTAGATCGGAAGAGCGGTTTCAG  |
| chr3  | 178937851 | 178937890 | PIK3CA_5933 | + | GTGACCTATGCACCAGACGTTTATTTCCCAATTAATCTTAAAGTACATATTACTTGGCTAGATCGGAAGAGCGGTTTCAG    |
| chr3  | 178938956 | 178938995 | PIK3CA_5934 | + | GTGACCTATGCACCAGACGTCAGTTGTGTTTTGAGACTCTTTTCACTGCAGTGGGGCAGAGATCGGAAGAGCGGTTTCAG    |
| chr3  | 178941986 | 178942025 | PIK3CA_5935 | + | GTGACCTATGCACCAGACGTGGGGGTTTCTATTGATATTTAAATAAATACCTTTTCTGGAGATCGGAAGAGCGGTTTCAG    |
| chr3  | 178942620 | 178942659 | PIK3CA_5936 | + | GTGACCTATGCACCAGACGTGATTAATGAGCTTATGATGCATGAATTTAGCTATCTTTTAGATCGGAAGAGCGGTTTCAG    |
| chr3  | 178943839 | 178943878 | PIK3CA_5937 | + | GTGACCTATGCACCAGACGTAGTAAGGCAACCTGTATGTTGAAAGTTATCCTGAAAAAGTAGATCGGAAGAGCGGTTTCAG   |
| chr3  | 178947241 | 178947280 | PIK3CA_5938 | + | GTGACCTATGCACCAGACGTTTATTCTTTCTTCTCTATGTTAATCTAAGTTTTTGTGATAGATCGGAAGAGCGGTTTCAG    |
| chr3  | 178947920 | 178947959 | PIK3CA_5939 | + | GTGACCTATGCACCAGACGTTCTGTTTTAAATTTTGGTGTCTTAAATTTATTCAAGATCGGAAGAGCGGTTTCAG         |
| chr3  | 178948175 | 178948214 | PIK3CA_5940 | + | GTGACCTATGCACCAGACGTGCAATTAATAAACACAAAAAAGAGTTTCTGGCTGCTATAGATCGGAAGAGCGGTTTCAG     |
| chr3  | 178952163 | 178952202 | PIK3CA_5941 | + | GTGACCTATGCACCAGACGTGAGAAAATGAAAGCTCACTCTGGATTCCACACTGCACTGTAGATCGGAAGAGCGGTTTCAG   |
| chr13 | 48878196  | 48878235  | RB1_5942    | + | GTGACCTATGCACCAGACGTAGAGCCGCCCTGCGCTCACGCGGGAAGGGCGCCCCGGGTGAGATCGGAAGAGCGGTTTCAG   |
| chr13 | 48916861  | 48916900  | RB1_5943    | + | GTGACCTATGCACCAGACGTTTGTATAAATATAAGCCTCTGCCATAAAGGAAACGAATTAGATCGGAAGAGCGGTTTCAG    |
| chr13 | 48919346  | 48919385  | RB1_5944    | + | GTGACCTATGCACCAGACGTCAATTTATTAGGTTTACACTCTGATTTTTTATGTATTGTAGATCGGAAGAGCGGTTTCAG    |
| chr13 | 48922010  | 48922049  | RB1_5945    | + | GTGACCTATGCACCAGACGTACAGAATTTATTTTTCACTTAAAAAAAAGATTTTTATAGATCGGAAGAGCGGTTTCAG      |
| chr13 | 48923170  | 48923209  | RB1_5946    | + | GTGACCTATGCACCAGACGTTATTTTAAATGTAATAATTTCAAATGTAATAAATAAAGATCGGAAGAGCGGTTTCAG       |
| chr13 | 48937104  | 48937143  | RB1_5947    | + | GTGACCTATGCACCAGACGTTTCATGATTTCTTTAAAACAGTTAAAGTAGATTTAGATGTAGATCGGAAGAGCGGTTTCAG   |
| chr13 | 48939118  | 48939157  | RB1_5948    | + | GTGACCTATGCACCAGACGTAGGAAATTAATAAAATATTAATGTTTTGAGACTGTGGAGAGATCGGAAGAGCGGTTTCAG    |
| chr13 | 48941750  | 48941789  | RB1_5949    | + | GTGACCTATGCACCAGACGTTGGTATATTTGATTGTTTCTTTAGATATAGTTGATACAGATCGGAAGAGCGGTTTCAG      |
| chr13 | 48947639  | 48947678  | RB1_5950    | + | GTGACCTATGCACCAGACGTTGAAACATTTATTGTAATATCTTGGCAAAGAAACATAGATCGGAAGAGCGGTTTCAG       |
| chr13 | 48951181  | 48951220  | RB1_5951    | + | GTGACCTATGCACCAGACGTTTATGTAATTTCTGGTACTATAGAGTAATAATATTAAAGATCGGAAGAGCGGTTTCAG      |
| chr13 | 48954388  | 48954427  | RB1_5952    | + | GTGACCTATGCACCAGACGTTTTTTCATAAATAAACACTTTTTGTTCAATTTAAAGTTAAAAAGATCGGAAGAGCGGTTTCAG |
| chr13 | 48955590  | 48955629  | RB1_5953    | + | GTGACCTATGCACCAGACGTAATAATTGAAGAAATTCATTCATGTGCATATGGCTAACAAAGATCGGAAGAGCGGTTTCAG   |
| chr13 | 49027258  | 49027297  | RB1_5954    | + | GTGACCTATGCACCAGACGTTATATGTTATGTTGACCATTCAAACCTGCAAATAGATTTTAAAGATCGGAAGAGCGGTTTCAG |
| chr13 | 49033980  | 49034019  | RB1_5955    | + | GTGACCTATGCACCAGACGTCAAGCACTTCACTTCTCTCCTCCTACTTACTTGTTAACAGATCGGAAGAGCGGTTTCAG     |
| chr13 | 49037982  | 49038021  | RB1_5956    | + | GTGACCTATGCACCAGACGTTCCATAGTAAGTTTTTTGATAAATCCATATCCATAACAAGATCGGAAGAGCGGTTTCAG     |
| chr13 | 49039258  | 49039297  | RB1_5957    | + | GTGACCTATGCACCAGACGTAGTATCTTGTATTGAAAAAATCTAATGTAATGGGTCCACAGATCGGAAGAGCGGTTTCAG    |
| chr13 | 49039515  | 49039554  | RB1_5958    | + | GTGACCTATGCACCAGACGTTCTCTTAGGGAAGTAGTAAAGAATGAGAGGGGGATTATTAGATCGGAAGAGCGGTTTCAG    |
| chr13 | 49047537  | 49047576  | RB1_5959    | + | GTGACCTATGCACCAGACGTTCTTCTATGAAATATAATAGTATGCATTGTAAGTATAAAAGATCGGAAGAGCGGTTTCAG    |
| chr13 | 49050990  | 49051029  | RB1_5960    | + | GTGACCTATGCACCAGACGTGTTTTGAATGTTTTCCAGTACCGGAGATGGTCATCTGGGGAGATCGGAAGAGCGGTTTCAG   |
| chr13 | 49051551  | 49051590  | RB1_5961    | + | GTGACCTATGCACCAGACGTTTTTTCACCTTGTTGTAATGAAATAAACAAATTTTACACTAGATCGGAAGAGCGGTTTCAG   |
| chr13 | 49054218  | 49054257  | RB1_5962    | + | GTGACCTATGCACCAGACGTACCTTGGTGGACACTGTGTACACTCTGGATTCAATGTTCTAGATCGGAAGAGCGGTTTCAG   |
| chr17 | 29422398  | 29422437  | NF1_5963    | + | GTGACCTATGCACCAGACGTGCTGGCGGGCGGGAGGTGGGAGCGGAGTGGGGGTGGGGACAGATCGGAAGAGCGGTTTCAG   |
| chr17 | 29483155  | 29483194  | NF1_5964    | + | GTGACCTATGCACCAGACGTGGGTTACTGTGTTTTGGGGAATTTGCTTTCTTTTCTTTTATAGATCGGAAGAGCGGTTTCAG  |
| chr17 | 29486122  | 29486161  | NF1_5965    | + | GTGACCTATGCACCAGACGTTGATCTTAAGTAGGCAGGCTTTGTGAATTTGATCTTGAGAAGATCGGAAGAGCGGTTTCAG   |
| chr17 | 29490405  | 29490444  | NF1_5966    | + | GTGACCTATGCACCAGACGTTAAATCCACATGGGACTCAAGTAATATGAATATTAGAAAGATCGGAAGAGCGGTTTCAG     |
| chr17 | 29497026  | 29497065  | NF1_5967    | + | GTGACCTATGCACCAGACGTATGTAATATATCTGAAAAAATCACTGGGTCAAAAACATAGATCGGAAGAGCGGTTTCAG     |
| chr17 | 29508518  | 29508557  | NF1_5968    | + | GTGACCTATGCACCAGACGTACCTCTCTGGTATGAAATTTGTTTTTGTGTTGATAAATTTAGATCGGAAGAGCGGTTTCAG   |
| chr17 | 29508814  | 29508853  | NF1_5969    | + | GTGACCTATGCACCAGACGTGATTGATTTTTTTTTTTTTTTTGTCTTTTAAATGCCTACTAGATCGGAAGAGCGGTTTCAG   |
| chr17 | 29509694  | 29509733  | NF1_5970    | + | GTGACCTATGCACCAGACGTCAAATATTTCATTATATCTAGATGTGAAGCAGTTTATAGATCGGAAGAGCGGTTTCAG      |
| chr17 | 29527624  | 29527663  | NF1_5971    | + | GTGACCTATGCACCAGACGTTATCTTCTCTACTACAACCTTAAAGAAAATTAATGAAAGATCGGAAGAGCGGTTTCAG      |
| chr17 | 29528188  | 29528227  | NF1_5972    | + | GTGACCTATGCACCAGACGTTGGTTTTATCTAACTATATTACTGATGCTGTTATCTTTAGATCGGAAGAGCGGTTTCAG     |
| chr17 | 29528514  | 29528553  | NF1_5973    | + | GTGACCTATGCACCAGACGTTAAGTATTGCTAAATTAACAAAAAATTTTTTTCTTTTCTTTAGATCGGAAGAGCGGTTTCAG  |
| chr17 | 29533400  | 29533439  | NF1_5974    | + | GTGACCTATGCACCAGACGTTCAAGTAAATCTCACCTCTTCTATTGCAATTTTAGATCGGAAGAGCGGTTTCAG          |

|       |           |           |          |   |                                                                                       |
|-------|-----------|-----------|----------|---|---------------------------------------------------------------------------------------|
| chr17 | 29541614  | 29541653  | NF1_5975 | + | GTGACCTATGCACCAGACGTTTTTATGAAATGTCTCAAAATTATCACACTAAGTTAATTGAGATCGGAAGAGCGGTTTCAG     |
| chr17 | 29546147  | 29546186  | NF1_5976 | + | GTGACCTATGCACCAGACGTAATGAATCCATGTTCTTGAAGGAAAGATTGTAACATATGTAGATCGGAAGAGCGGTTTCAG     |
| chr17 | 29549019  | 29549058  | NF1_5977 | + | GTGACCTATGCACCAGACGTTCTGTAGTACTTAGTACATTGTA AAACTTACACTTCCAAAGAGATCGGAAGAGCGGTTTCAG   |
| chr17 | 29550596  | 29550635  | NF1_5978 | + | GTGACCTATGCACCAGACGTTGACATATTTAAAAAATGGAAGAATATTTGGAATGGTAATAGATCGGAAGAGCGGTTTCAG     |
| chr17 | 29552279  | 29552318  | NF1_5979 | + | GTGACCTATGCACCAGACGTTCTGTACTTTTTCTGTATCATTTTATGTGCTCTGTTTGTAGATCGGAAGAGCGGTTTCAG      |
| chr17 | 29553713  | 29553752  | NF1_5980 | + | GTGACCTATGCACCAGACGTATAGTGGTTTTTTTTACTCAGTCTGCCTCAAAGCACATGGAGATCGGAAGAGCGGTTTCAG     |
| chr17 | 29554320  | 29554359  | NF1_5981 | + | GTGACCTATGCACCAGACGTAGCAACGAACACCCCTCCAGCGCCACCCTCAATTTAGATCGGAAGAGCGGTTTCAG          |
| chr17 | 29554635  | 29554674  | NF1_5982 | + | GTGACCTATGCACCAGACGTAAGTTGACTTTTTGTCTGTAACTGATCTGCTAAATATATAGATCGGAAGAGCGGTTTCAG      |
| chr17 | 29556494  | 29556533  | NF1_5983 | + | GTGACCTATGCACCAGACGTTCTTATTTTTACCTTTCTCTATGAATAGAGTGACTTGTAGATCGGAAGAGCGGTTTCAG       |
| chr17 | 29557003  | 29557042  | NF1_5984 | + | GTGACCTATGCACCAGACGTTACTGAAATGTAGCAGAACATTTTAAAGAGATAAGAAAAAGATCGGAAGAGCGGTTTCAG      |
| chr17 | 29557411  | 29557450  | NF1_5985 | + | GTGACCTATGCACCAGACGTA AAAAGCAATGTAGGGTCTTGTAATCTTAATATGTCCAAGATCGGAAGAGCGGTTTCAG      |
| chr17 | 29557954  | 29557993  | NF1_5986 | + | GTGACCTATGCACCAGACGTAATGACCTTCAAGTATTAGTGGGTTTTACTGTGAGAGTTAAGATCGGAAGAGCGGTTTCAG     |
| chr17 | 29559218  | 29559257  | NF1_5987 | + | GTGACCTATGCACCAGACGTTGTCACCAAAAACATAAAGCAAAAAGCAAAATAAAGCCCAAGATCGGAAGAGCGGTTTCAG     |
| chr17 | 29559910  | 29559949  | NF1_5988 | + | GTGACCTATGCACCAGACGTATGAAAGTTTTCATATAGAATAACAAAACCTAGAGAAGTGGAGATCGGAAGAGCGGTTTCAG    |
| chr17 | 29562801  | 29562840  | NF1_5989 | + | GTGACCTATGCACCAGACGTTTTCATTTTGTGTGTATGTGTGCTGAGGATGTCAAGTAAGATCGGAAGAGCGGTTTCAG       |
| chr17 | 29563050  | 29563089  | NF1_5990 | + | GTGACCTATGCACCAGACGTTTTTTCATAGAACCGCTGTTTTTGTTTTTTTTTTTTGTAGATCGGAAGAGCGGTTTCAG       |
| chr17 | 29576148  | 29576187  | NF1_5991 | + | GTGACCTATGCACCAGACGTAGTTAGAGATTACCATTATTAATCTAAAGTTAAATTTAGAGATCGGAAGAGCGGTTTCAG      |
| chr17 | 29580029  | 29580068  | NF1_5992 | + | GTGACCTATGCACCAGACGTGAGACTTTTTATGACTGTTTTCTTCAAAGCAAAAACAAAAAGATCGGAAGAGCGGTTTCAG     |
| chr17 | 29585531  | 29585570  | NF1_5993 | + | GTGACCTATGCACCAGACGTTTGATAATCTAGCTACTTTAAATTCCTTCCAACATAAAGATCGGAAGAGCGGTTTCAG        |
| chr17 | 29586158  | 29586197  | NF1_5994 | + | GTGACCTATGCACCAGACGTTGCCACTTACTCAGTTGCTCTGTTTGAATCAAATATTTTCAGATCGGAAGAGCGGTTTCAG     |
| chr17 | 29587544  | 29587583  | NF1_5995 | + | GTGACCTATGCACCAGACGTCCAGTCATGGGGATAGTGAACACTCTCCGTTTTAAATTTAGAGATCGGAAGAGCGGTTTCAG    |
| chr17 | 29588886  | 29588925  | NF1_5996 | + | GTGACCTATGCACCAGACGTACCTTGAATAGTTGATTGCTTTCTTTTTGGTTGAGAAGGAGATCGGAAGAGCGGTTTCAG      |
| chr17 | 29592368  | 29592407  | NF1_5997 | + | GTGACCTATGCACCAGACGTTCTATGTTTTGGGTCCTTAAACAGAAATTTTTAAATTTATAGAGATCGGAAGAGCGGTTTCAG   |
| chr17 | 29653281  | 29653320  | NF1_5998 | + | GTGACCTATGCACCAGACGTGTCTGTGTTTTGTAACAGTTCATTGCTTTTTCTTACTAAAGATCGGAAGAGCGGTTTCAG      |
| chr17 | 29654868  | 29654907  | NF1_5999 | + | GTGACCTATGCACCAGACGTTAAAATTTCTCTTTCAGTTTGAATTTGGGGTTTGTGCTTTTAAAGATCGGAAGAGCGGTTTCAG  |
| chr17 | 29657527  | 29657566  | NF1_6000 | + | GTGACCTATGCACCAGACGTATAATTTCTTTAATACTAACAAATTTCTAAGAGAATTAGATCGGAAGAGCGGTTTCAG        |
| chr17 | 29663502  | 29663541  | NF1_6001 | + | GTGACCTATGCACCAGACGTTTCTTTTGCCTTCTGTACTATAGCATATCTGTTTTATCATAGATCGGAAGAGCGGTTTCAG     |
| chr17 | 29663943  | 29663982  | NF1_6002 | + | GTGACCTATGCACCAGACGTGGAAGGAATTTGTGTTTACCAGTTCTCTTCCATTTTAAAGATCGGAAGAGCGGTTTCAG       |
| chr17 | 29664611  | 29664650  | NF1_6003 | + | GTGACCTATGCACCAGACGTCAAAATGATAAGAACTAAGTTAAAATCTTTTTTAAAAAAGATCGGAAGAGCGGTTTCAG       |
| chr17 | 29664909  | 29664948  | NF1_6004 | + | GTGACCTATGCACCAGACGTAATTAATAAAGTTGTAAGAAATATGCATATTGTTGAAAAAGATCGGAAGAGCGGTTTCAG      |
| chr17 | 29665168  | 29665207  | NF1_6005 | + | GTGACCTATGCACCAGACGTGCCCTCAGTTCTCCCAAATTTTATGGTTCTCAAGTTGTAGATCGGAAGAGCGGTTTCAG       |
| chr17 | 29665834  | 29665873  | NF1_6006 | + | GTGACCTATGCACCAGACGTTATAGAAAATGAGTGCATTCATTTTGGGTATCAGTGTGGAAGATCGGAAGAGCGGTTTCAG     |
| chr17 | 29667674  | 29667713  | NF1_6007 | + | GTGACCTATGCACCAGACGTTTTGCCTTGAGGTTCTAGATTACTCAAATTTAGTACTCTAGATCGGAAGAGCGGTTTCAG      |
| chr17 | 29670164  | 29670203  | NF1_6008 | + | GTGACCTATGCACCAGACGTTCTTATTTAGAAATTTTCTGAAAGTACTATTAAGAAAACAGATCGGAAGAGCGGTTTCAG      |
| chr17 | 29676280  | 29676319  | NF1_6009 | + | GTGACCTATGCACCAGACGTAAAATAACAAAATTAATCTTGCTACATCTATATATAAGGATCGGAAGAGCGGTTTCAG        |
| chr17 | 29677347  | 29677386  | NF1_6010 | + | GTGACCTATGCACCAGACGTTTACTCTCTATAATTACATAATCATAATCAAGTTTCAATAGATCGGAAGAGCGGTTTCAG      |
| chr17 | 29683611  | 29683650  | NF1_6011 | + | GTGACCTATGCACCAGACGTAAGTATTGATCTAGATCATTGAAAATAAGGTGGGAGAGTAAGATCGGAAGAGCGGTTTCAG     |
| chr17 | 29684119  | 29684158  | NF1_6012 | + | GTGACCTATGCACCAGACGTCCCTTTTTGAGTCCCCACCCTCAAATTTTTTATCCAGTAGATCGGAAGAGCGGTTTCAG       |
| chr17 | 29684398  | 29684437  | NF1_6013 | + | GTGACCTATGCACCAGACGTTCTTTGATTTTAAATTCACCTTCGTGCCTGTCTTTAAGTTAGATCGGAAGAGCGGTTTCAG     |
| chr17 | 29685651  | 29685690  | NF1_6014 | + | GTGACCTATGCACCAGACGTTGATCTGGAGAAGGATGGTGTGATGAACCTGCTAACATGCTAGATCGGAAGAGCGGTTTCAG    |
| chr17 | 29686044  | 29686083  | NF1_6015 | + | GTGACCTATGCACCAGACGTATATTTTTTCTAACTTTTGCAAAATGAAGGTTTTCTGTAGATCGGAAGAGCGGTTTCAG       |
| chr17 | 29687732  | 29687771  | NF1_6016 | + | GTGACCTATGCACCAGACGTTGATCTTTATAGACTTTGAGCAACAATAAGACACCAAGATCGGAAGAGCGGTTTCAG         |
| chr17 | 29701184  | 29701223  | NF1_6017 | + | GTGACCTATGCACCAGACGTTCTTTTTTAAAATCAACTTAAACATGGGCTTCTCAAGATCGGAAGAGCGGTTTCAG          |
| chr7  | 116340349 | 116340388 | MET_6018 | + | GTGACCTATGCACCAGACGTTTCAGTTCCCACTTATAAACTGTGAGGTATAAATTAGAAAAGATCGGAAGAGCGGTTTCAG     |
| chr7  | 116371924 | 116371963 | MET_6019 | + | GTGACCTATGCACCAGACGTTCTGAGAGTAGCTGTGCTGTCTGTTCTATCTGGTATTGTGCAAAAGATCGGAAGAGCGGTTTCAG |
| chr7  | 116380149 | 116380188 | MET_6020 | + | GTGACCTATGCACCAGACGTTCCACAGGGAATTTGCTATAGACGTGTGTTTTTCCCAAATGCAGATCGGAAGAGCGGTTTCAG   |
| chr7  | 116395580 | 116395619 | MET_6021 | + | GTGACCTATGCACCAGACGTTAAAATGCTTTTGTGGGGTGTGCTTGGAAAATAGTTTTGAGATCGGAAGAGCGGTTTCAG      |
| chr7  | 116397604 | 116397643 | MET_6022 | + | GTGACCTATGCACCAGACGTTTCTATCCTATCATGTTTGTATTTTACTTAATCTATTTAAAGATCGGAAGAGCGGTTTCAG     |
| chr7  | 116397839 | 116397878 | MET_6023 | + | GTGACCTATGCACCAGACGTTTTATTTTTTGTGCATCTGTCAATTTGAATTAATATCTGAGATCGGAAGAGCGGTTTCAG      |
| chr7  | 116398685 | 116398724 | MET_6024 | + | GTGACCTATGCACCAGACGTGCTTCTGATGGGTAAAGAAAACAAATGAATACAAGGATGAAGATCGGAAGAGCGGTTTCAG     |
| chr7  | 116399555 | 116399594 | MET_6025 | + | GTGACCTATGCACCAGACGTTGAGCAATGGTTCTACTCAGAGCTGCATCTTTGCCCTAGATCGGAAGAGCGGTTTCAG        |
| chr7  | 116403333 | 116403372 | MET_6026 | + | GTGACCTATGCACCAGACGTTTAAAACCTTTCTAAATCATTGCTCAAACTTAATTTAGATCGGAAGAGCGGTTTCAG         |
| chr7  | 116409856 | 116409895 | MET_6027 | + | GTGACCTATGCACCAGACGTTGCATTCCTCTCATGATGTAATAAGGAAGCCAGTGAATAGATCGGAAGAGCGGTTTCAG       |
| chr7  | 116411719 | 116411758 | MET_6028 | + | GTGACCTATGCACCAGACGTTACTGTTTCAATTTTAGAAGTTACTTAAAGAACACAGTCAAGATCGGAAGAGCGGTTTCAG     |
| chr7  | 116412054 | 116412093 | MET_6029 | + | GTGACCTATGCACCAGACGTTTATTTGTTCTGAGAAATACCTATACATATACCTCAGTGAAGATCGGAAGAGCGGTTTCAG     |
| chr7  | 116415176 | 116415215 | MET_6030 | + | GTGACCTATGCACCAGACGTTCACTCAGCTTTTTGTAAATACGATTTTCCAGTAAGCATAGATCGGAAGAGCGGTTTCAG      |
| chr7  | 116417534 | 116417573 | MET_6031 | + | GTGACCTATGCACCAGACGTTTTTATTTAAACCTGGAGTATACCTTTGTGGTTTGAACACAGATCGGAAGAGCGGTTTCAG     |
| chr7  | 116419022 | 116419061 | MET_6032 | + | GTGACCTATGCACCAGACGTTGCCAAGCTTAACTGGCAAACACTGCTGTAAGCCAGCCAGATCGGAAGAGCGGTTTCAG       |



|       |           |           |           |   |                                                                                              |
|-------|-----------|-----------|-----------|---|----------------------------------------------------------------------------------------------|
| chr7  | 116422162 | 116422201 | MET_6033  | + | GTGACCTATGCACCAGACGTGAATCTCTGTGCCACAATCCAAATTAAGTGACAAGGAGGAAGATCGGAAGAGCGGTTTCAG            |
| chr7  | 116423534 | 116423573 | MET_6034  | + | GTGACCTATGCACCAGACGTGGTTATCTCTGAGTTTCTCCTCTTTTACTTTTCATATCCAAAGATCGGAAGAGCGGTTTCAG           |
| chr7  | 116435856 | 116435895 | MET_6035  | + | GTGACCTATGCACCAGACGTTTTCTGTACCTCTTACGTTCTTTACTTTTACAGAAATGCCAGATCGGAAGAGCGGTTTCAG            |
| chr7  | 116436189 | 116436228 | MET_6036  | + | GTGACCTATGCACCAGACGTATGTCAAAGCAACAGTCCACACTTTGTCCAATGGTTTTTAGATCGGAAGAGCGGTTTCAG             |
| chr7  | 116339549 | 116339588 | MET_6037  | + | GTGACCTATGCACCAGACGTGAGGGACCTGCCAGCGACATGTCTTTCCCCACAATCATAGATCGGAAGAGCGGTTTCAG              |
| chr7  | 116339949 | 116339988 | MET_6038  | + | GTGACCTATGCACCAGACGTGCTCAGACTTTTCCACACAAGAAATAACAGTTCTGTTCCAAGATCGGAAGAGCGGTTTCAG            |
| chr12 | 58142411  | 58142451  | CDK4_6039 | + | GTGACCTATGCACCAGACGTAGGCAAGAGTGCAGAAAAGGTCAGAAAACCATGAAGAAAACAGACTTCTGCAGATCGGAAGAGCGGTTTCAG |
| chr12 | 58143111  | 58143150  | CDK4_6040 | + | GTGACCTATGCACCAGACGTGAGGAGAACTCTGGTTCAGGAGGGTCTCCAGTTCCCATCCAGATCGGAAGAGCGGTTTCAG            |
| chr12 | 58143298  | 58143337  | CDK4_6041 | + | GTGACCTATGCACCAGACGTAAAGGATATAAGGTAGCAGTCATTTTCAAAGATATCTTAGAGATCGGAAGAGCGGTTTCAG            |
| chr12 | 58144559  | 58144598  | CDK4_6042 | + | GTGACCTATGCACCAGACGTAGGAAAGATGGATGGGGACCCCATGGGTACCATGAAACAGATCGGAAGAGCGGTTTCAG              |
| chr12 | 58144884  | 58144923  | CDK4_6043 | + | GTGACCTATGCACCAGACGTAGGGGAGGTACAGATGCACTGGAAACTAGGCACCATACCTAGATCGGAAGAGCGGTTTCAG            |
| chr12 | 58145136  | 58145175  | CDK4_6044 | + | GTGACCTATGCACCAGACGTAAATGCTCACTTTTCAATCCCCTTAAACCAACATGCCAGATCGGAAGAGCGGTTTCAG               |
| chr12 | 58145511  | 58145550  | CDK4_6045 | + | GTGACCTATGCACCAGACGTAGGAGAACCTACAACTACAGACTCCTATCACCAAAGTCAGATCGGAAGAGCGGTTTCAG              |
| chr11 | 108098434 | 108098473 | ATM_6046  | + | GTGACCTATGCACCAGACGTACTTAAATTCATTTTCTTCTGAAATAAGTGTGATTAGTAAGATCGGAAGAGCGGTTTCAG             |
| chr11 | 108098626 | 108098665 | ATM_6047  | + | GTGACCTATGCACCAGACGTCAAATTTATTTACTGTCTTTATTTTCTCTTTTCATATTTAGATCGGAAGAGCGGTTTCAG             |
| chr11 | 108100061 | 108100100 | ATM_6048  | + | GTGACCTATGCACCAGACGTTTATAAATATAAATAAATGGCTTAACAGATTAAGTGTGCGAGATCGGAAGAGCGGTTTCAG            |
| chr11 | 108106572 | 108106611 | ATM_6049  | + | GTGACCTATGCACCAGACGTAAAGTGTGTTGTTGTTGTAATTTTCTCTCATGAAATGAACTAGATCGGAAGAGCGGTTTCAG           |
| chr11 | 108114856 | 108114895 | ATM_6050  | + | GTGACCTATGCACCAGACGTCTCTTTTCTTTTGTGTTTGTGTTTGTGTTTAAATATGTTTGTATCGGAAGAGCGGTTTCAG            |
| chr11 | 108115764 | 108115803 | ATM_6051  | + | GTGACCTATGCACCAGACGTAAAGTGTGTTTACTGTTTTGAAATTTGCTTCTTATTCAAACATAAGATCGGAAGAGCGGTTTCAG        |
| chr11 | 108117865 | 108117904 | ATM_6052  | + | GTGACCTATGCACCAGACGTTAGGTCATGTCCACATTTAGAAATTTCTGTTAATTTTTTATAGATCGGAAGAGCGGTTTCAG           |
| chr11 | 108119840 | 108119879 | ATM_6053  | + | GTGACCTATGCACCAGACGTACCATTTTCTCATTAGTGTCAATTTAATCTCTTGTATGTAGATCGGAAGAGCGGTTTCAG             |
| chr11 | 108122769 | 108122808 | ATM_6054  | + | GTGACCTATGCACCAGACGTTTCATTAGCATGCTGCTGTTTTTTTTGTTTGTATATAGATCGGAAGAGCGGTTTCAG                |
| chr11 | 108123650 | 108123689 | ATM_6055  | + | GTGACCTATGCACCAGACGTTAATAATGCTCTTTATCATTTAAGCTATAGCTTTAATTAAGATCGGAAGAGCGGTTTCAG             |
| chr11 | 108124777 | 108124816 | ATM_6056  | + | GTGACCTATGCACCAGACGTTAAAGAAAGCAACTATATATGATTCAACTTTGGTAGATCGGAAGAGCGGTTTCAG                  |
| chr11 | 108127078 | 108127117 | ATM_6057  | + | GTGACCTATGCACCAGACGTTTATACTAATAAAGTTTCGGATAAATTTGAATGAAATGTAAGATCGGAAGAGCGGTTTCAG            |
| chr11 | 108138080 | 108138119 | ATM_6058  | + | GTGACCTATGCACCAGACGTATTTACTACTTGGGATTTCTTTACTTCTTTATATTGATTAGATCGGAAGAGCGGTTTCAG             |
| chr11 | 108139347 | 108139386 | ATM_6059  | + | GTGACCTATGCACCAGACGTTTAAATGAAGAAGCTCTTGATTTTTATCTGATGTTGCTGAAGATCGGAAGAGCGGTTTCAG            |
| chr11 | 108141884 | 108141923 | ATM_6060  | + | GTGACCTATGCACCAGACGTAAACCTTATGTTATGTTCACTTTAAAGTTATAAATAACAGATCGGAAGAGCGGTTTCAG              |
| chr11 | 108142144 | 108142183 | ATM_6061  | + | GTGACCTATGCACCAGACGTTCTATTTTGGTCTATTTTCTTTTGTCTATCTGTGGATGATCGGAAGAGCGGTTTCAG                |
| chr11 | 108143345 | 108143384 | ATM_6062  | + | GTGACCTATGCACCAGACGTGCTATTTTTTGTAGTAAGATCTCCATTGAAAATTTTAAAGCAAGATCGGAAGAGCGGTTTCAG          |
| chr11 | 108143590 | 108143629 | ATM_6063  | + | GTGACCTATGCACCAGACGTTAATATTCATGAAGTATTTGGAATGCTGCAGATGGCAGTAAGATCGGAAGAGCGGTTTCAG            |
| chr11 | 108150346 | 108150385 | ATM_6064  | + | GTGACCTATGCACCAGACGTGTAACATGTATTGCTGTTATCATATGCTTGTCTATGAATAAGATCGGAAGAGCGGTTTCAG            |
| chr11 | 108151906 | 108151945 | ATM_6065  | + | GTGACCTATGCACCAGACGTATGAGTATTTTATAGAAGCTTCTTAGGTCACCTGTGAAAAGATCGGAAGAGCGGTTTCAG             |
| chr11 | 108153617 | 108153656 | ATM_6066  | + | GTGACCTATGCACCAGACGTACATGACATGTGAAATTTGTTTAAATTTAAATTTAAGATCGGAAGAGCGGTTTCAG                 |
| chr11 | 108155211 | 108155250 | ATM_6067  | + | GTGACCTATGCACCAGACGTTAATTTTATGACTTTTCTTACTTTTCAATTTTAAATTTAAGATCGGAAGAGCGGTTTCAG             |
| chr11 | 108158453 | 108158492 | ATM_6068  | + | GTGACCTATGCACCAGACGTTTAAACTTAGAGAAGTACTCTAACTTCAAGTTTTTAAAGATCGGAAGAGCGGTTTCAG               |
| chr11 | 108159841 | 108159880 | ATM_6069  | + | GTGACCTATGCACCAGACGTATGATGAGTTTAAATAATAGAACATCTCTTCTTTTTTATAGATCGGAAGAGCGGTTTCAG             |
| chr11 | 108160539 | 108160578 | ATM_6070  | + | GTGACCTATGCACCAGACGTTATTTAGACCAATATATAAGCAGTCTTTCTATCCTGTTCTAGATCGGAAGAGCGGTTTCAG            |
| chr11 | 108163531 | 108163570 | ATM_6071  | + | GTGACCTATGCACCAGACGTGACTCATCTTCAAATGGTATTTAAATATATAAAGTATTAGATCGGAAGAGCGGTTTCAG              |
| chr11 | 108164215 | 108164254 | ATM_6072  | + | GTGACCTATGCACCAGACGTTTTCATCATCTACTATTTTTTATAGAACATAGTAGTAAGATCGGAAGAGCGGTTTCAG               |
| chr11 | 108165797 | 108165836 | ATM_6073  | + | GTGACCTATGCACCAGACGTTAAATGACATGGGCTATTCTACCTGTTTTCTTTTTGAAAGATCGGAAGAGCGGTTTCAG              |
| chr11 | 108170623 | 108170662 | ATM_6074  | + | GTGACCTATGCACCAGACGTATTGATACCTTATATGTAATCTCAATATGACATTCATGGAAGATCGGAAGAGCGGTTTCAG            |
| chr11 | 108172527 | 108172566 | ATM_6075  | + | GTGACCTATGCACCAGACGTTAATAAATGTTTATTGAATACCAGCATATCTAAACAGTAGATCGGAAGAGCGGTTTCAG              |
| chr11 | 108173767 | 108173806 | ATM_6076  | + | GTGACCTATGCACCAGACGTTAATTAGTCTGATATAATCTTGTTTTATGACCTGTTTATAGATCGGAAGAGCGGTTTCAG             |
| chr11 | 108175590 | 108175629 | ATM_6077  | + | GTGACCTATGCACCAGACGTTAATTTTTAACTAATACTGTAACCTCAGTTCTAGAGAAAAGATCGGAAGAGCGGTTTCAG             |
| chr11 | 108178722 | 108178761 | ATM_6078  | + | GTGACCTATGCACCAGACGTGAGTGTGCTTCTACGTTTAGAGTGTAACTTAGATCGGAAGAGCGGTTTCAG                      |
| chr11 | 108181053 | 108181092 | ATM_6079  | + | GTGACCTATGCACCAGACGTTTAGAATTTTTGGTTTTTAAATTAATGTTGGCATTGTCTAGATCGGAAGAGCGGTTTCAG             |
| chr11 | 108183236 | 108183275 | ATM_6080  | + | GTGACCTATGCACCAGACGTGAGGCTCTATTATTTATGACAGTATTTATCTCATACTTTGAGATCGGAAGAGCGGTTTCAG            |
| chr11 | 108186649 | 108186688 | ATM_6081  | + | GTGACCTATGCACCAGACGTTTTTCTAAACAACGGTATAGTAATCTGTTTATGAAGGAAGATCGGAAGAGCGGTTTCAG              |
| chr11 | 108186851 | 108186890 | ATM_6082  | + | GTGACCTATGCACCAGACGTTCCAGATTTGGTAAAGCCATCACTAGTGTAGTGTGAGGAGATCGGAAGAGCGGTTTCAG              |
| chr11 | 108188259 | 108188298 | ATM_6083  | + | GTGACCTATGCACCAGACGTTGACTGATTTTTTTTTTGCCTCTCTCATTCTAAAGATCGGAAGAGCGGTTTCAG                   |
| chr11 | 108190796 | 108190835 | ATM_6084  | + | GTGACCTATGCACCAGACGTTAAGCAAAAGTACTGTTTTTAACTTTAATGTCATGGCTAGATCGGAAGAGCGGTTTCAG              |
| chr11 | 108192158 | 108192197 | ATM_6085  | + | GTGACCTATGCACCAGACGTGATGACTTTGTTATCCTAAAGTGCAGCTTTTCTGTTACAGATCGGAAGAGCGGTTTCAG              |
| chr11 | 108196282 | 108196321 | ATM_6086  | + | GTGACCTATGCACCAGACGTTTTAAACTATGTCATCTTACCTTTGACTTTCTTTTATAGATCGGAAGAGCGGTTTCAG               |
| chr11 | 108196963 | 108197002 | ATM_6087  | + | GTGACCTATGCACCAGACGTTTTATTGGCTGGATTAGTGTTTTACTGTTATTTAAAAAAGATCGGAAGAGCGGTTTCAG              |
| chr11 | 108198496 | 108198535 | ATM_6088  | + | GTGACCTATGCACCAGACGTTGGAGCAACCTTAAGATGTTACTTAGCATGAATATGCTAGATCGGAAGAGCGGTTTCAG              |
| chr11 | 108199976 | 108200015 | ATM_6089  | + | GTGACCTATGCACCAGACGTTTACAAAGTGACAAATTTTACTTCCACAGTTAACTGATGATCGGAAGAGCGGTTTCAG               |
| chr11 | 108202775 | 108202814 | ATM_6090  | + | GTGACCTATGCACCAGACGTTAAACATGACCTTTTTAGAAGTGTGATTTACAGTCTTTAGATCGGAAGAGCGGTTTCAG              |

|       |           |           |             |   |                                                                                     |
|-------|-----------|-----------|-------------|---|-------------------------------------------------------------------------------------|
| chr11 | 108203638 | 108203677 | ATM_6091    | + | GTGACCTATGCACCAGACGTTTTAAAGAAGAAACGTTACTTTCTTGCTGTGTTACTCTCTAGATCGGAAGAGCGGTTTCAG   |
| chr11 | 108205847 | 108205886 | ATM_6092    | + | GTGACCTATGCACCAGACGCTCTTCTCTGGCTTAGCCCTTAGAGTTTTAGTGATGAAAATAGATCGGAAGAGCGGTTTCAG   |
| chr11 | 108206699 | 108206738 | ATM_6093    | + | GTGACCTATGCACCAGACGTGACTTCTGTGATTCCACAAAAACATATAAAAGATGCCAAGATCGGAAGAGCGGTTTCAG     |
| chr11 | 108214109 | 108214148 | ATM_6094    | + | GTGACCTATGCACCAGACGTCCCAAAATTAAGGTTATTGTAAGATTATTTAATGGCTTAAGATCGGAAGAGCGGTTTCAG    |
| chr11 | 108216646 | 108216685 | ATM_6095    | + | GTGACCTATGCACCAGACGTTGTACATATAGTAGATTGACACCTTTGTTGTTTGGCAGGTAGATCGGAAGAGCGGTTTCAG   |
| chr11 | 108218103 | 108218142 | ATM_6096    | + | GTGACCTATGCACCAGACGTAATCTATGTATCTATTCTTTTGTAGAAATTTGGTCATAGATCGGAAGAGCGGTTTCAG      |
| chr11 | 108224618 | 108224657 | ATM_6097    | + | GTGACCTATGCACCAGACGTTGAAGTAAAGGAAAGAAAATTTTTGATGTCAAATTCACAGATCGGAAGAGCGGTTTCAG     |
| chr11 | 108225612 | 108225651 | ATM_6098    | + | GTGACCTATGCACCAGACGTTTATAAGGAAGACTTTATTTTTTTCTTACCAGGTAGACTAGATCGGAAGAGCGGTTTCAG    |
| chr11 | 108235956 | 108235995 | ATM_6099    | + | GTGACCTATGCACCAGACGTTTTTAAGAAGGTCCTGTTGTCAGTTTTTCAGATTTTCTTAAGATCGGAAGAGCGGTTTCAG   |
| chr11 | 108236246 | 108236285 | ATM_6100    | + | GTGACCTATGCACCAGACGTATGAATTACCCTTTCATTAGCCCTTAGAAAATATATTTAGATCGGAAGAGCGGTTTCAG     |
| chr4  | 55124995  | 55125034  | PDGFRA_6101 | + | GTGACCTATGCACCAGACGTGAGTCCCTCTGAGTTCCTTGTGGGTGCTTGTGTTTTTGTAGATCGGAAGAGCGGTTTCAG    |
| chr4  | 55127590  | 55127629  | PDGFRA_6102 | + | GTGACCTATGCACCAGACGTTGGGTCTCCAGGACCAACTTCTCTCTTCTCCAGATCGGAAGAGCGGTTTCAG            |
| chr4  | 55130105  | 55130144  | PDGFRA_6103 | + | GTGACCTATGCACCAGACGTCATCTCCTTCTTCTTAAAGTAAAGAGTAACAGGCAAAATCAGATCGGAAGAGCGGTTTCAG   |
| chr4  | 55133638  | 55133677  | PDGFRA_6104 | + | GTGACCTATGCACCAGACGCTTTTCTAAAATGTCAGTTGTCCATGCTGCTCGGGATCCATAGATCGGAAGAGCGGTTTCAG   |
| chr4  | 55133919  | 55133958  | PDGFRA_6105 | + | GTGACCTATGCACCAGACGTTCTCTGCCAAGATGCCTTTTTTAGTGTGCATCAGAGGAGATCGGAAGAGCGGTTTCAG      |
| chr4  | 55136926  | 55136965  | PDGFRA_6106 | + | GTGACCTATGCACCAGACGTGGAGTATAAAGATAATGCTAGCTCTGTAGATGAGTGTCTTAGATCGGAAGAGCGGTTTCAG   |
| chr4  | 55138698  | 55138737  | PDGFRA_6107 | + | GTGACCTATGCACCAGACGTCAGATGTGCTTCTTCTTTCCTGGTCAGAAATTTCTCCAGATCGGAAGAGCGGTTTCAG      |
| chr4  | 55139908  | 55139947  | PDGFRA_6108 | + | GTGACCTATGCACCAGACGTTGAAACAGTCAAGCACTGAGCCGATCAGCTGCCCCAGATCGGAAGAGCGGTTTCAG        |
| chr4  | 55140803  | 55140842  | PDGFRA_6109 | + | GTGACCTATGCACCAGACGTTCTCATAAACTAAAAGATCTTTGAAGCCAATGAGAACAAGAGATCGGAAGAGCGGTTTCAG   |
| chr4  | 55141151  | 55141190  | PDGFRA_6110 | + | GTGACCTATGCACCAGACGTTGGGGTAACTCCCAAGACTCCCTTTTCCCTTGCACACAAGATCGGAAGAGCGGTTTCAG     |
| chr4  | 55143670  | 55143709  | PDGFRA_6111 | + | GTGACCTATGCACCAGACGTTCTCTGGGGATTTTTGAGCAGGGGATTTTTGAGCATAGATCGGAAGAGCGGTTTCAG       |
| chr4  | 55144184  | 55144223  | PDGFRA_6112 | + | GTGACCTATGCACCAGACGTTGACCTGGAGTGAGGATTTTCACTGGACACATGTGGTTGTAGATCGGAAGAGCGGTTTCAG   |
| chr4  | 55144693  | 55144732  | PDGFRA_6113 | + | GTGACCTATGCACCAGACGTAGAGAGATGTTGCTGTCTATCATTATCTACAGGCATCAGATCGGAAGAGCGGTTTCAG      |
| chr4  | 55151664  | 55151703  | PDGFRA_6114 | + | GTGACCTATGCACCAGACGTGGAAACAGACCTTTTTAAGACCAAGATTTTCACTGAGTGGAAAGATCGGAAGAGCGGTTTCAG |
| chr4  | 55152141  | 55152180  | PDGFRA_6115 | + | GTGACCTATGCACCAGACGTACTTCCCTCACTGGTCAAGCTCATCTCTTCACTTTAATAGATCGGAAGAGCGGTTTCAG     |
| chr4  | 55153719  | 55153758  | PDGFRA_6116 | + | GTGACCTATGCACCAGACGTGACATTGCTGCTTATTTGGGCTGTTCTGAAACACCACTGGAGATCGGAAGAGCGGTTTCAG   |
| chr4  | 55155076  | 55155115  | PDGFRA_6117 | + | GTGACCTATGCACCAGACGTTCCCATCCCGGGGGCTGTGTTTACAGTCTGTGGGTCTAAGATCGGAAGAGCGGTTTCAG     |
| chr4  | 55155292  | 55155331  | PDGFRA_6118 | + | GTGACCTATGCACCAGACGTATCTGTGGGTGAAAGCTCTGGATAAAGCTGGAAGTTATAAGATCGGAAGAGCGGTTTCAG    |
| chr4  | 55156732  | 55156771  | PDGFRA_6119 | + | GTGACCTATGCACCAGACGTGGGCAGCTCGGTGCTCACCCTTCCCTCCCTTAGGCAGATCGGAAGAGCGGTTTCAG        |
| chr4  | 55161450  | 55161489  | PDGFRA_6120 | + | GTGACCTATGCACCAGACGTCGAGGGTTTCCCTTCCACTCTGGGGCCACCTCTGGATCCAGATCGGAAGAGCGGTTTCAG    |
| chr12 | 69202282  | 69202321  | MDM2_6121   | + | GTGACCTATGCACCAGACGTGGCAGCGAGCGGTCACTTTTGGGTCTGGGCTGTGACGGTGAGATCGGAAGAGCGGTTTCAG   |
| chr12 | 69203083  | 69203122  | MDM2_6122   | + | GTGACCTATGCACCAGACGTTTGTCTCGTGAACTTTTAAGAATAATTTATTTTATGAAGAGATCGGAAGAGCGGTTTCAG    |
| chr12 | 69207419  | 69207458  | MDM2_6123   | + | GTGACCTATGCACCAGACGTTCAAGAGATAAGTAGTATCTCACTAGTTACATGTAGCCATAGATCGGAAGAGCGGTTTCAG   |
| chr12 | 69210736  | 69210775  | MDM2_6124   | + | GTGACCTATGCACCAGACGTAGTTTAGTCCATTGTA AAAAGCCATCTGGGCTAACATTTTCAGATCGGAAGAGCGGTTTCAG |
| chr12 | 69214165  | 69214204  | MDM2_6125   | + | GTGACCTATGCACCAGACGTTTGGAGCATCTGGATAAATACCATAAAAACGTTTTAAAGAGATCGGAAGAGCGGTTTCAG    |
| chr12 | 69218221  | 69218260  | MDM2_6126   | + | GTGACCTATGCACCAGACGTTAAATTTCTCATTCTAATGTAATATTTATTTGCAAATTTGGAAGATCGGAAGAGCGGTTTCAG |
| chr12 | 69218442  | 69218481  | MDM2_6127   | + | GTGACCTATGCACCAGACGTATATTTATTTGACGCATTCACACAGCTTTTTGATATTCTTAGATCGGAAGAGCGGTTTCAG   |
| chr12 | 69222722  | 69222761  | MDM2_6128   | + | GTGACCTATGCACCAGACGTCATTTTAAAGTAAAGGCAAGACTCTTACTGTTCAAAGTCTAGAGATCGGAAGAGCGGTTTCAG |
| chr12 | 69222975  | 69222914  | MDM2_6129   | + | GTGACCTATGCACCAGACGTTTTTCCCTCTAATATATTGAAAAATTTATAAATTTTATAGATCGGAAGAGCGGTTTCAG     |
| chr12 | 69230540  | 69230579  | MDM2_6130   | + | GTGACCTATGCACCAGACGTATCTACTTTTTAAGAAATAAAAATTTTATTAAGTCAAGAGATCGGAAGAGCGGTTTCAG     |
| chr12 | 69233640  | 69233679  | MDM2_6131   | + | GTGACCTATGCACCAGACGTTAAGAGAATTTATATTTTTCTAACTATATAAACCTTAGGAAGATCGGAAGAGCGGTTTCAG   |
| chr12 | 69233352  | 69233391  | MDM2_6132   | + | GTGACCTATGCACCAGACGTTAGTAGCATTATTTATAGCAGCCAAGAAGATGTGAAAGAAGATCGGAAGAGCGGTTTCAG    |
| chr5  | 112090733 | 112090772 | APC_6133    | + | GTGACCTATGCACCAGACGTTGTGACTTTAATTGTAGTTATCCATTTTTATTTCAGTATAGATCGGAAGAGCGGTTTCAG    |
| chr5  | 112102118 | 112102157 | APC_6134    | + | GTGACCTATGCACCAGACGTAAAAGTGTTTTAAAATAATTTTTTAAAGCTCAAATTTGCAAGATCGGAAGAGCGGTTTCAG   |
| chr5  | 112103098 | 112103137 | APC_6135    | + | GTGACCTATGCACCAGACGTTTCATATAGTAAACATGCTTGTGACTCCAGTTTATTGAGATCGGAAGAGCGGTTTCAG      |
| chr5  | 112114445 | 112114484 | APC_6136    | + | GTGACCTATGCACCAGACGTTGGCAGTACAACTTTTAAACTTTAAACTTTGATATTAGATCGGAAGAGCGGTTTCAG       |
| chr5  | 112116611 | 112116650 | APC_6137    | + | GTGACCTATGCACCAGACGTTGTTTCTAAGTGATAAAAACAGCGAAGAGCTATTAGGAATAAGATCGGAAGAGCGGTTTCAG  |
| chr5  | 112128237 | 112128276 | APC_6138    | + | GTGACCTATGCACCAGACGTTGCCTTTCTGTTTGTGGGTATAAAAATAGGTAGTTATTTCAGATCGGAAGAGCGGTTTCAG   |
| chr5  | 112151301 | 112151340 | APC_6139    | + | GTGACCTATGCACCAGACGTATTACAACCCCTGGTCACTAATGCCATGACTACTTTGCTAAGATCGGAAGAGCGGTTTCAG   |
| chr5  | 112155052 | 112155091 | APC_6140    | + | GTGACCTATGCACCAGACGTTATAGTGTACATCGTAGTGCATGTTTCAAAGCAAATGTGAAGATCGGAAGAGCGGTTTCAG   |
| chr5  | 112157699 | 112157738 | APC_6141    | + | GTGACCTATGCACCAGACGTAATGTTTTTAAATGACATAGACAATTACTGGTGGATTTTATAGATCGGAAGAGCGGTTTCAG  |
| chr5  | 112162955 | 112162994 | APC_6142    | + | GTGACCTATGCACCAGACGTATAACATGTATTTCTTAAAGATAGCTCAGGTATGAGTTAATAGATCGGAAGAGCGGTTTCAG  |
| chr5  | 112164680 | 112164719 | APC_6143    | + | GTGACCTATGCACCAGACGTTAAACATTTAGTACTATAATGAATTTTCATGTTTGGCTTTAGATCGGAAGAGCGGTTTCAG   |
| chr5  | 112170873 | 112170912 | APC_6144    | + | GTGACCTATGCACCAGACGTAGTTTTATATTACTTTTAAAGTACAGAATTCATACTCTCAAGATCGGAAGAGCGGTTTCAG   |
| chr5  | 112179834 | 112179873 | APC_6145    | + | GTGACCTATGCACCAGACGTGAATGAAACTAAGAAAATTTCTATGTTAATTAACAAGTCTAAGATCGGAAGAGCGGTTTCAG  |
| chr5  | 112173730 | 112173769 | APC_6146    | + | GTGACCTATGCACCAGACGTTTTAATACTGGCAACATGACTGCTCTTACCATATTTAGATCGGAAGAGCGGTTTCAG       |
| chr5  | 112174200 | 112174239 | APC_6147    | + | GTGACCTATGCACCAGACGTTGATGGTTTAAAGAGGTTCAAATGAAACCCCTGATCGGAAGAGCGGTTTCAG            |
| chr5  | 112174670 | 112174709 | APC_6148    | + | GTGACCTATGCACCAGACGTCAGTCTTTGTGTGAAAAGATGACTATGAAGATGATAAGCAGATCGGAAGAGCGGTTTCAG    |

|       |           |           |            |   |                                                                                         |
|-------|-----------|-----------|------------|---|-----------------------------------------------------------------------------------------|
| chr5  | 112175140 | 112175179 | APC_6149   | + | GTGACCTATGCACCAGACGTTGAAGATGAAATAGGATGTAATCAGACGCACACAGGAAGCAAGATCGGAAGAGCGGTTTCAG      |
| chr5  | 112175610 | 112175649 | APC_6150   | + | GTGACCTATGCACCAGACGTCACCACCTCCTCAAACAGCTCAAACCAAGCGAGAAGTACCAGATCGGAAGAGCGGTTTCAG       |
| chr5  | 112176080 | 112176119 | APC_6151   | + | GTGACCTATGCACCAGACGTTACTGCTTCAAATACCTCCACCTGTGGCAAGGAAACCAAGATCGGAAGAGCGGTTTCAG         |
| chr5  | 112176550 | 112176589 | APC_6152   | + | GTGACCTATGCACCAGACGTATCTGCGTCTTTCTTCTGCACCAACAAAAATCAGTTAGATAGATCGGAAGAGCGGTTTCAG       |
| chr5  | 112177020 | 112177059 | APC_6153   | + | GTGACCTATGCACCAGACGTCACAAGCTATTGCAAAGCAGCCAAATAATCGAGGTACGCCAGATCGGAAGAGCGGTTTCAG       |
| chr5  | 112177490 | 112177529 | APC_6154   | + | GTGACCTATGCACCAGACGTAATATGGTGGCATATTAGGTGAAGATCTGACACTTGATTAGATCGGAAGAGCGGTTTCAG        |
| chr5  | 112177960 | 112177999 | APC_6155   | + | GTGACCTATGCACCAGACGTAATCTCTCGAGCCAGCAATGTTTCATATTCAGGAGTTAGATCGGAAGAGCGGTTTCAG          |
| chr5  | 112178430 | 112178469 | APC_6156   | + | GTGACCTATGCACCAGACGTAACAACAGGTTTATCCAAGAATGCCAGTAGTATTCCAAGAGATCGGAAGAGCGGTTTCAG        |
| chr5  | 112178900 | 112178939 | APC_6157   | + | GTGACCTATGCACCAGACGTTCTAGACTTCCAATCAATAGGTCAGGAACCTGAAAACGTGAGATCGGAAGAGCGGTTTCAG       |
| chr5  | 112179370 | 112179409 | APC_6158   | + | GTGACCTATGCACCAGACGTCATTAAGATTCAAAAGATAATCAGGCAAACAAAAATGTGAGATCGGAAGAGCGGTTTCAG        |
| chr22 | 41489113  | 41489152  | EP300_6159 | + | GTGACCTATGCACCAGACGTCGACGCCCGGCCCTCCACGTTCCCTTTAATCTTTTCTACTAGATCGGAAGAGCGGTTTCAG       |
| chr22 | 41513836  | 41513875  | EP300_6160 | + | GTGACCTATGCACCAGACGTTTTGGTTGTGTGCACAATCCGCATGCATGTGAGTATTGAGATCGGAAGAGCGGTTTCAG         |
| chr22 | 41522055  | 41522094  | EP300_6161 | + | GTGACCTATGCACCAGACGTATCCATTACAGACTGTTTTCAAATGGCATTMTTTCACAAAAGATCGGAAGAGCGGTTTCAG       |
| chr22 | 41523763  | 41523802  | EP300_6162 | + | GTGACCTATGCACCAGACGTCACAGGGTTACTGTACTTAGCAATTTTTACAGCCAGGGAAGATCGGAAGAGCGGTTTCAG        |
| chr22 | 41526018  | 41526057  | EP300_6163 | + | GTGACCTATGCACCAGACGTAATCTTTTGAAGGTTTATATGAAAAGTTTTAAAGTCTCAAGATCGGAAGAGCGGTTTCAG        |
| chr22 | 41527648  | 41527687  | EP300_6164 | + | GTGACCTATGCACCAGACGTGTCACTCAATAACATGGTATTGGTTGTGTGTCAGTAAATGAAGATCGGAAGAGCGGTTTCAG      |
| chr22 | 41531921  | 41531960  | EP300_6165 | + | GTGACCTATGCACCAGACGTACTGTGTTATACCTCGGGTACATTAACAATACTACTGGAGATCGGAAGAGCGGTTTCAG         |
| chr22 | 41533805  | 41533844  | EP300_6166 | + | GTGACCTATGCACCAGACGTTGTGGACAGCTCATTCTGTAAGAGATGTTACGTCGAACAGATCGGAAGAGCGGTTTCAG         |
| chr22 | 41536272  | 41536311  | EP300_6167 | + | GTGACCTATGCACCAGACGTGTTTTTTTCTATTAATAGCCAAGATTGAACCTGTTGTGGAGATCGGAAGAGCGGTTTCAG        |
| chr22 | 41537237  | 41537276  | EP300_6168 | + | GTGACCTATGCACCAGACGTTTTGTTATATTTCTGTTTGGAGAAAATTGATAATAAAATAAGATCGGAAGAGCGGTTTCAG       |
| chr22 | 41543961  | 41544000  | EP300_6169 | + | GTGACCTATGCACCAGACGTCGTCTTTGGTAATCTCTTTGGCCTTTACCTGGTATTTTGAAGATCGGAAGAGCGGTTTCAG       |
| chr22 | 41545190  | 41545229  | EP300_6170 | + | GTGACCTATGCACCAGACGTTAAGTGGATTTTTCACTTATTTTTGATTCTTGAAACTTCTAGATCGGAAGAGCGGTTTCAG       |
| chr22 | 41546213  | 41546252  | EP300_6171 | + | GTGACCTATGCACCAGACGTTATTTGGATTAGGCAGAACTTAGAGCTATACTGTAGTAAGATCGGAAGAGCGGTTTCAG         |
| chr22 | 41548027  | 41548066  | EP300_6172 | + | GTGACCTATGCACCAGACGTGGAATGCTGTTTTGTTTTGTTAGGACTCAGTATAGGAAGATCGGAAGAGCGGTTTCAG          |
| chr22 | 41548365  | 41548404  | EP300_6173 | + | GTGACCTATGCACCAGACGTGAAGCCATTGTTCTGGAGGTAGCTGAAGAAACCAAGACAGATCGGAAGAGCGGTTTCAG         |
| chr22 | 41553423  | 41553462  | EP300_6174 | + | GTGACCTATGCACCAGACGTTGTTTCAGATTTGACTTTAACTTTTCTGGGATACCTAGAAAAGATCGGAAGAGCGGTTTCAG      |
| chr22 | 41554515  | 41554554  | EP300_6175 | + | GTGACCTATGCACCAGACGTCAGGTGTGGACCATTGGTCCATGTGTCCACATGTCCAGGGAGATCGGAAGAGCGGTTTCAG       |
| chr22 | 41556737  | 41556776  | EP300_6176 | + | GTGACCTATGCACCAGACGTGCATTATTTTGAAGAGTCTAATAGTTTGTGTTCCAGTGAAGATCGGAAGAGCGGTTTCAG        |
| chr22 | 41558794  | 41558833  | EP300_6177 | + | GTGACCTATGCACCAGACGTTCCCTTTGAAATGTCAGTACGCTTTGGCTTTTCTTTTCCAGATCGGAAGAGCGGTTTCAG        |
| chr22 | 41560145  | 41560184  | EP300_6178 | + | GTGACCTATGCACCAGACGTACGTTGTAATCTTCTGGAATTTTTCTTTATCGTAATAAGATCGGAAGAGCGGTTTCAG          |
| chr22 | 41562681  | 41562720  | EP300_6179 | + | GTGACCTATGCACCAGACGTTTCTAAAGGTAATTTTGGCAAACCTATCTGAAGCCTAAGATCGGAAGAGCGGTTTCAG          |
| chr22 | 41564614  | 41564653  | EP300_6180 | + | GTGACCTATGCACCAGACGTATTTCACTTTTCTCTCCTCGTGGATCCAAAATGCTCATAGATCGGAAGAGCGGTTTCAG         |
| chr22 | 41564882  | 41564921  | EP300_6181 | + | GTGACCTATGCACCAGACGTCACAGTGGCTAGCTCCGGATTTGTGTGGGAGTTCCAACAGATCGGAAGAGCGGTTTCAG         |
| chr22 | 41565631  | 41565670  | EP300_6182 | + | GTGACCTATGCACCAGACGTTTGTATAATGGCTTTTTTTCTTTAATAGCATGGCATTCTAGATCGGAAGAGCGGTTTCAG        |
| chr22 | 41566586  | 41566625  | EP300_6183 | + | GTGACCTATGCACCAGACGTACATAGGGCCAGGTGCTGACAATAGATCTGGAATCTGGAATGACACAGATCGGAAGAGCGGTTTCAG |
| chr22 | 41568678  | 41568717  | EP300_6184 | + | GTGACCTATGCACCAGACGTTGAGTTTCTTTGAAACTTCTATCATGATTCTAATATTTAAGATCGGAAGAGCGGTTTCAG        |
| chr22 | 41572543  | 41572582  | EP300_6185 | + | GTGACCTATGCACCAGACGTGGTTGTGGGAAGGAGGAGGTGAGCTCCGCAGGGTTGTTCTAGATCGGAAGAGCGGTTTCAG       |
| chr22 | 41574971  | 41575010  | EP300_6186 | + | GTGACCTATGCACCAGACGTTAGTATTTTGGGAGCAAAAAATATTTTCTCTTAAACAAGATCGGAAGAGCGGTTTCAG          |
| chr22 | 41513518  | 41513557  | EP300_6187 | + | GTGACCTATGCACCAGACGTGTGGACCAATCAGGGTCTACGCAGTCAACAGGTATGATAGATCGGAAGAGCGGTTTCAG         |
| chr22 | 41573224  | 41573263  | EP300_6188 | + | GTGACCTATGCACCAGACGTCGGACTGGTGTGGTTGGGCAGCAACAGGGCCTCCCTCCAGATCGGAAGAGCGGTTTCAG         |
| chr22 | 41573661  | 41573700  | EP300_6189 | + | GTGACCTATGCACCAGACGTAGGGATGGGACCGAGGATGCAGCAACAGCCACCCTGGAGATCGGAAGAGCGGTTTCAG          |
| chr22 | 41574098  | 41574137  | EP300_6190 | + | GTGACCTATGCACCAGACGTCAGCCATGCAGAACATGAATCCAATGCAGGCGGGGCTTCAAGATCGGAAGAGCGGTTTCAG       |
| chr22 | 41574535  | 41574574  | EP300_6191 | + | GTGACCTATGCACCAGACGTCAGCCCAACCCCATGAGCCCCAGCAGCATATGCTCCAAAGATCGGAAGAGCGGTTTCAG         |
| chr19 | 45854990  | 45855029  | ERCC2_6192 | + | GTGACCTATGCACCAGACGTCAGAGGAAAGGGAGAGGGGGGCACTGTTGGCAGGGGCCAGATCGGAAGAGCGGTTTCAG         |
| chr19 | 45855621  | 45855660  | ERCC2_6193 | + | GTGACCTATGCACCAGACGTAAGCGCAGGGCAGGGACAGAAGGTCATTGCGGGGAGCCTGGAGATCGGAAGAGCGGTTTCAG      |
| chr19 | 45855918  | 45855957  | ERCC2_6194 | + | GTGACCTATGCACCAGACGTTGAGAGTGAAGCTGAGAGCTGGGAGGACTCCCTCCAGATCGGAAGAGCGGTTTCAG            |
| chr19 | 45856085  | 45856124  | ERCC2_6195 | + | GTGACCTATGCACCAGACGTTGAGGAGAGGGGGCGAGGGGGTTTACAAGTGTGGCTGGTGGAGATCGGAAGAGCGGTTTCAG      |
| chr19 | 45856424  | 45856463  | ERCC2_6196 | + | GTGACCTATGCACCAGACGTTGAGACCGAGACGCAAGTTAGTCACTCCTCAGAGCCACCTAGATCGGAAGAGCGGTTTCAG       |
| chr19 | 45856603  | 45856642  | ERCC2_6197 | + | GTGACCTATGCACCAGACGTTACCAGGGAGGTGAGGGTGGGTTTCAAGGACAGCCATCCTAGATCGGAAGAGCGGTTTCAG       |
| chr19 | 45858120  | 45858159  | ERCC2_6198 | + | GTGACCTATGCACCAGACGTTTCAAGGTTGGGCCCTCTCCTGGCCAGGTCCTCCTCCTAGATCGGAAGAGCGGTTTCAG         |
| chr19 | 45858997  | 45859036  | ERCC2_6199 | + | GTGACCTATGCACCAGACGTACAGAGTACAGATGAGGAGGCGAGCAGCAACTGCTCCAGAGATCGGAAGAGCGGTTTCAG        |
| chr19 | 45860640  | 45860679  | ERCC2_6200 | + | GTGACCTATGCACCAGACGTACAGTGGGAGGATCTCAGCAGGACTGGCAGGACAGGAGATCGGAAGAGCGGTTTCAG           |
| chr19 | 45860812  | 45860851  | ERCC2_6201 | + | GTGACCTATGCACCAGACGTTAGGGCAGTGGGGCCCGGGGGCTGGGCCCCGACCCAGATCGGAAGAGCGGTTTCAG            |
| chr19 | 45860968  | 45861007  | ERCC2_6202 | + | GTGACCTATGCACCAGACGTCAGGCAAGGAGGGGTGAGATTACCCACTACAGCCACAGCAGATCGGAAGAGCGGTTTCAG        |
| chr19 | 45864911  | 45864950  | ERCC2_6203 | + | GTGACCTATGCACCAGACGTTGAGAGACGGGGTTCGGGGGGCAGACGGAAGCATGAGCAGGAGATCGGAAGAGCGGTTTCAG      |
| chr19 | 45867180  | 45867219  | ERCC2_6204 | + | GTGACCTATGCACCAGACGTACGCTATCAGCGGCGAGCGGGGAGGCGGAAAGGGACTGGGAGATCGGAAGAGCGGTTTCAG       |
| chr19 | 45867388  | 45867427  | ERCC2_6205 | + | GTGACCTATGCACCAGACGTTGAGCTGGGGCTGGAGGGGGCTGGCAACCTGGGGCAGCAAGATCGGAAGAGCGGTTTCAG        |
| chr19 | 45867600  | 45867639  | ERCC2_6206 | + | GTGACCTATGCACCAGACGTTGGAGAGAGCCGGCTCAGGCAGGCCCTCAGAGGGCCTACTAGATCGGAAGAGCGGTTTCAG       |

|       |           |           |             |   |                                                                                    |
|-------|-----------|-----------|-------------|---|------------------------------------------------------------------------------------|
| chr19 | 45867816  | 45867855  | ERCC2_6207  | + | GTGACCTATGCACCAGACGTGGGGAGCAGGGTTACCAGGGCCCTGCCACCCCAACCCTAAGATCGGAAGAGCGGTTTCAG   |
| chr19 | 45868223  | 45868262  | ERCC2_6208  | + | GTGACCTATGCACCAGACGTAGTGCCAGGGGTGACGGAGGCTGCCGCCAGGCTACCTAGATCGGAAGAGCGGTTTCAG     |
| chr19 | 45868427  | 45868466  | ERCC2_6209  | + | GTGACCTATGCACCAGACGTGGGGCATCTTAGCACCCAGACAGGGTGGAAACCCAACCACAGATCGGAAGAGCGGTTTCAG  |
| chr19 | 45872012  | 45872051  | ERCC2_6210  | + | GTGACCTATGCACCAGACGTGTTGGGGGGCAGGGGAGCTTGTGCTCATTGGAGGCACAAAGATCGGAAGAGCGGTTTCAG   |
| chr19 | 45872261  | 45872300  | ERCC2_6211  | + | GTGACCTATGCACCAGACGTCAAGCGGACTCAGTCCCTGTCCCGCCCTTCTTTGTCTGAGATCGGAAGAGCGGTTTCAG    |
| chr19 | 45872416  | 45872455  | ERCC2_6212  | + | GTGACCTATGCACCAGACGTGGGACCAGAGGGGCAACACAGGGTCTCAGAACCTTGGGAGATCGGAAGAGCGGTTTCAG    |
| chr19 | 45873434  | 45873473  | ERCC2_6213  | + | GTGACCTATGCACCAGACGTGTGCTCGGGGTAGATGTAGCTACGCGGAAGTAGACCAGGAAGATCGGAAGAGCGGTTTCAG  |
| chr19 | 45873501  | 45873540  | ERCC2_6214  | + | GTGACCTATGCACCAGACGTGGGGCTGCTGGGTGAGTTCCCGTCCCCTCAGCCCTCTCCAGATCGGAAGAGCGGTTTCAG   |
| chr19 | 45873809  | 45873848  | ERCC2_6215  | + | GTGACCTATGCACCAGACGTGGACTGTGCAGCGGGTGCACCCGCTCCCTCATGAATATAGATCGGAAGAGCGGTTTCAG    |
| chr12 | 25362856  | 25362895  | KRAS_6216   | + | GTGACCTATGCACCAGACGTAAAAAGTATAAAAATGTGAATATATACGATGGCTTCATGAGATCGGAAGAGCGGTTTCAG   |
| chr12 | 25368505  | 25368544  | KRAS_6217   | + | GTGACCTATGCACCAGACGTAAACACAACCTCTTTAAAGTCTGTTGCATTGGTAAAGTAAGATCGGAAGAGCGGTTTCAG   |
| chr12 | 25378718  | 25378757  | KRAS_6218   | + | GTGACCTATGCACCAGACGTAAAAAAGTTATAGCACAGCTATTAGTAACACAATATCTAGATCGGAAGAGCGGTTTCAG    |
| chr12 | 25380357  | 25380396  | KRAS_6219   | + | GTGACCTATGCACCAGACGTGAGAACACAGTCTGGATTATACAGTGCACCTTTTACTTCAGATCGGAAGAGCGGTTTCAG   |
| chr12 | 25398329  | 25398368  | KRAS_6220   | + | GTGACCTATGCACCAGACGTCTTATAATAAAAAATAATGAAATGTGACTATATTAGAACAGATCGGAAGAGCGGTTTCAG   |
| chr7  | 106510012 | 106510051 | PIK3CG_6221 | + | GTGACCTATGCACCAGACGTGGTGTATCAATGGAAGCCTTCTCAAAGGAATGATTAGATCGGAAGAGCGGTTTCAG       |
| chr7  | 106513058 | 106513097 | PIK3CG_6222 | + | GTGACCTATGCACCAGACGTCCATTTTGATAATAGCGTGAATTTTAAAGTTGCCAAGAATAGATCGGAAGAGCGGTTTCAG  |
| chr7  | 106513394 | 106513433 | PIK3CG_6223 | + | GTGACCTATGCACCAGACGTATATTTTCTGTGTTCTTTCCAAATGCCTTCATCTCCAAGATCGGAAGAGCGGTTTCAG     |
| chr7  | 106515259 | 106515298 | PIK3CG_6224 | + | GTGACCTATGCACCAGACGTCTGGATGCTCCATGGTCTTTTATGTCTTGAAGATGCAGATCGGAAGAGCGGTTTCAG      |
| chr7  | 106520121 | 106520160 | PIK3CG_6225 | + | GTGACCTATGCACCAGACGTTTAAGATTGTTTTCAATTTACTGAAACAATTCTATATTAGATCGGAAGAGCGGTTTCAG    |
| chr7  | 106522663 | 106522702 | PIK3CG_6226 | + | GTGACCTATGCACCAGACGTACCTCAGGAGATGAATAGACCTCTCAGCTCGTTTGAAAAGAGATCGGAAGAGCGGTTTCAG  |
| chr7  | 106523619 | 106523658 | PIK3CG_6227 | + | GTGACCTATGCACCAGACGTGCTTTTTCCAGTCTAATGGCTCCTTACAAGTTGCATTAGATCGGAAGAGCGGTTTCAG     |
| chr7  | 106526748 | 106526787 | PIK3CG_6228 | + | GTGACCTATGCACCAGACGTTCCTTCATCGCCTGCTGAGAATAGCACCAGAGCAGATGTAGATCGGAAGAGCGGTTTCAG   |
| chr7  | 106545843 | 106545882 | PIK3CG_6229 | + | GTGACCTATGCACCAGACGTAGAATAAAAAAAGTTAGTGTCTATGGTTTAAATTAGATCGGAAGAGCGGTTTCAG        |
| chr7  | 106508516 | 106508555 | PIK3CG_6230 | + | GTGACCTATGCACCAGACGTGATGAGCTGGAGTGGAGTGGCTGGCTGGTGACCCGAGATCGGAAGAGCGGTTTCAG       |
| chr7  | 106509015 | 106509054 | PIK3CG_6231 | + | GTGACCTATGCACCAGACGTGAGCAGCTTACCATCCACGGCAAGGACCACGAGAGTGTGTAGATCGGAAGAGCGGTTTCAG  |
| chr7  | 106509514 | 106509553 | PIK3CG_6232 | + | GTGACCTATGCACCAGACGTGCTCTGCACTAACCCAGACAAGGAGAATCAATGTCCATAGATCGGAAGAGCGGTTTCAG    |
| chr17 | 41197830  | 41197869  | BRCA1_6233  | + | GTGACCTATGCACCAGACGTAGAACACAGCAGAGATTAGTGAATTCATTCTCTGGAAGATCGGAAGAGCGGTTTCAG      |
| chr17 | 41201222  | 41201261  | BRCA1_6234  | + | GTGACCTATGCACCAGACGTATTAGATGTAATAACTGACGTAATCTGCATACTTAAAGATCGGAAGAGCGGTTTCAG      |
| chr17 | 41203145  | 41203184  | BRCA1_6235  | + | GTGACCTATGCACCAGACGTAGAGGAAGAGAGGGGAGGGAATGGAGAGAAGAAAAGATCGGAAGAGCGGTTTCAG        |
| chr17 | 41209163  | 41209202  | BRCA1_6236  | + | GTGACCTATGCACCAGACGTCCAAACACAACCCATCAGGATAAGAGAAGAGAAGCTTCCAGATCGGAAGAGCGGTTTCAG   |
| chr17 | 41215401  | 41215440  | BRCA1_6237  | + | GTGACCTATGCACCAGACGTATAGAAAAGACAGGTTACATACAGCAGAAGAACGTGCTCAGATCGGAAGAGCGGTTTCAG   |
| chr17 | 41215979  | 41216018  | BRCA1_6238  | + | GTGACCTATGCACCAGACGTAAAAACACTCAAAGATTAGAAGTTGAAAACAAAATCAGGAGATCGGAAGAGCGGTTTCAG   |
| chr17 | 41219723  | 41219762  | BRCA1_6239  | + | GTGACCTATGCACCAGACGTATCAAATATTCATTATCATGAGTTACCTTAGCACACAGAGATCGGAAGAGCGGTTTCAG    |
| chr17 | 41223266  | 41223305  | BRCA1_6240  | + | GTGACCTATGCACCAGACGTGGGGAAGTTAATTTACACAACGATGAATGTTGAATTAAGATCGGAAGAGCGGTTTCAG     |
| chr17 | 41226549  | 41226588  | BRCA1_6241  | + | GTGACCTATGCACCAGACGTAAATGGAAGGAAAACCACTCCGCAACCAATTTGAAAAGGAAGATCGGAAGAGCGGTTTCAG  |
| chr17 | 41228642  | 41228681  | BRCA1_6242  | + | GTGACCTATGCACCAGACGTAATGAGAAAACAATCTACTTTACTGCTTTGTTCTGATAGAGATCGGAAGAGCGGTTTCAG   |
| chr17 | 41234603  | 41234642  | BRCA1_6243  | + | GTGACCTATGCACCAGACGTGATAAATGGCACCAAGAAAATGAAATACTTTGAGAAGCTTAGATCGGAAGAGCGGTTTCAG  |
| chr17 | 41243060  | 41243099  | BRCA1_6244  | + | GTGACCTATGCACCAGACGTAAAAACAGAGTTTCAGATGTAAGAGCAGACTATAACGCTAGATCGGAAGAGCGGTTTCAG   |
| chr17 | 41246670  | 41246709  | BRCA1_6245  | + | GTGACCTATGCACCAGACGTGTGAGTAATAAACTGCTGTTCTCATGCTGTAATGAGCTGGAGATCGGAAGAGCGGTTTCAG  |
| chr17 | 41246888  | 41246927  | BRCA1_6246  | + | GTGACCTATGCACCAGACGTACAAAAATAACAAGTACTCAAACCTGAATGTCATTAAGATCGGAAGAGCGGTTTCAG      |
| chr17 | 41247950  | 41247989  | BRCA1_6247  | + | GTGACCTATGCACCAGACGTAAGACAGAGTCTTAATAAGAAAACACTAGTTACATGATGCAGATCGGAAGAGCGGTTTCAG  |
| chr17 | 41249317  | 41249356  | BRCA1_6248  | + | GTGACCTATGCACCAGACGTTCCCCCAAAAAATAAATCAATAAAAGTTTTCTTAATTAAGATCGGAAGAGCGGTTTCAG    |
| chr17 | 41251908  | 41251947  | BRCA1_6249  | + | GTGACCTATGCACCAGACGTGGTAAAGAACAGTCAAGCAATTGTTGGCCAGTTCTGTGCAGATCGGAAGAGCGGTTTCAG   |
| chr17 | 41256289  | 41256328  | BRCA1_6250  | + | GTGACCTATGCACCAGACGTCAAGGGAAAACATTATGTTTGCAGTTAGAGAAAATGTATAGATCGGAAGAGCGGTTTCAG   |
| chr17 | 41256984  | 41257023  | BRCA1_6251  | + | GTGACCTATGCACCAGACGTATTGTTTGAGAAAACACACTCAGCAAGTGATTATCAACCTTAGATCGGAAGAGCGGTTTCAG |
| chr17 | 41258561  | 41258600  | BRCA1_6252  | + | GTGACCTATGCACCAGACGTAAAGAGAAAAGAACAACTTAAATTTACTTCTTTGTAGAGATCGGAAGAGCGGTTTCAG     |
| chr17 | 41276124  | 41276163  | BRCA1_6253  | + | GTGACCTATGCACCAGACGTTCCAATGAACCTTAAACACATTAGAAAACATATATATAAGATCGGAAGAGCGGTTTCAG    |
| chr17 | 41243920  | 41243959  | BRCA1_6254  | + | GTGACCTATGCACCAGACGTCTAATTTCTTGGCCCTCTTCGGTAACCTGAGCCAAATGAGATCGGAAGAGCGGTTTCAG    |
| chr17 | 41243951  | 41243990  | BRCA1_6255  | + | GTGACCTATGCACCAGACGTAGCCAAATGTGTATGGGTGAAAAGGGCTAGGACTCCTGCTAAGATCGGAAGAGCGGTTTCAG |
| chr17 | 41244378  | 41244417  | BRCA1_6256  | + | GTGACCTATGCACCAGACGTCTGGAGCCCCTCTCATTAGTACTGGAACCTACTTCATTAAGATCGGAAGAGCGGTTTCAG   |
| chr17 | 41244440  | 41244479  | BRCA1_6257  | + | GTGACCTATGCACCAGACGTAAAAACATTTCTCTAATGTTATTACGGCTAATTTGCTCAGATCGGAAGAGCGGTTTCAG    |
| chr17 | 41244836  | 41244875  | BRCA1_6258  | + | GTGACCTATGCACCAGACGTTTACATTTCAAAGTACTTTTGGACTTTGTTTCTTAAAGAGATCGGAAGAGCGGTTTCAG    |
| chr17 | 41244929  | 41244968  | BRCA1_6259  | + | GTGACCTATGCACCAGACGTTGAAAACGGAGCAAATGACTGGCGCTTTGAAACCTTGAATAGATCGGAAGAGCGGTTTCAG  |
| chr17 | 41245294  | 41245333  | BRCA1_6260  | + | GTGACCTATGCACCAGACGTACATGAGATCTTTGGGGTCTTACGATTATTAGACTTTAGATCGGAAGAGCGGTTTCAG     |
| chr17 | 41245418  | 41245457  | BRCA1_6261  | + | GTGACCTATGCACCAGACGTAGTAAAAGAACAGGTGCATTTGTTAACTTCAGCTCTGGGAGATCGGAAGAGCGGTTTCAG   |
| chr17 | 41245752  | 41245791  | BRCA1_6262  | + | GTGACCTATGCACCAGACGTTTAAATTCGAGTTCATATTTGCTTATACTGCTGCTTATAGATCGGAAGAGCGGTTTCAG    |
| chr17 | 41245907  | 41245946  | BRCA1_6263  | + | GTGACCTATGCACCAGACGTTTACCTACTTACCATTCTGCTCGTTTGGTTAGTCCGAGATCGGAAGAGCGGTTTCAG      |
| chr17 | 41246210  | 41246249  | BRCA1_6264  | + | GTGACCTATGCACCAGACGTTCTTTTACTTTTACATTTAAAGCCTCATGAGGATCACTGAGATCGGAAGAGCGGTTTCAG   |

|       |          |          |            |   |                                                                                      |
|-------|----------|----------|------------|---|--------------------------------------------------------------------------------------|
| chr17 | 41246396 | 41246435 | BRCA1_6265 | + | GTGACCTATGCACCAGACGCTCATTAACTTTCTGAATGCTGCTATTTAGTGTATCCAAAGATCGGAAGAGCGGTTTCAG      |
| chr19 | 1207213  | 1207252  | STK11_6266 | + | GTGACCTATGCACCAGACGCTTGTCTGGGGTCTGGGGCCGGGGCCGGCCAGTACAGGTCAGATCGGAAGAGCGGTTTCAG     |
| chr19 | 1218510  | 1218549  | STK11_6267 | + | GTGACCTATGCACCAGACGCTCGGTGTTGGGACCGGGGGCCCTCCGTGGGAGGGGCTGGGGAGATCGGAAGAGCGGTTTCAG   |
| chr19 | 1219423  | 1219462  | STK11_6268 | + | GTGACCTATGCACCAGACGTTGGGGCAGGGGCCAGGGTGGGGCCGGGGCCGGGGCCAGGCAGATCGGAAGAGCGGTTTCAG    |
| chr19 | 1220515  | 1220554  | STK11_6269 | + | GTGACCTATGCACCAGACGTGCTAGGGGGGGCCCTGGGGCCGGCCCTCCCGGGCACTCCAGATCGGAAGAGCGGTTTCAG     |
| chr19 | 1220727  | 1220766  | STK11_6270 | + | GTGACCTATGCACCAGACGTCGCCCCCGGGCACTACCCACAGCCACACTCCGAGGGGCAGATCGGAAGAGCGGTTTCAG      |
| chr19 | 1221350  | 1221389  | STK11_6271 | + | GTGACCTATGCACCAGACGTCATCCCTCTGCCCGCAGCCAGGGAGGGCGGGGCTTTGTAGATCGGAAGAGCGGTTTCAG      |
| chr19 | 1222016  | 1222055  | STK11_6272 | + | GTGACCTATGCACCAGACGTCCTGGGGCAGTGGGGCCGAGGCTGCAGGGAGGCCGGCCAAAGATCGGAAGAGCGGTTTCAG    |
| chr19 | 1223182  | 1223221  | STK11_6273 | + | GTGACCTATGCACCAGACGTCGGGGGGCCCTGCCCGGCTCTGCTGACTCGGCCAGGATGTAGATCGGAAGAGCGGTTTCAG    |
| chr19 | 1226657  | 1226696  | STK11_6274 | + | GTGACCTATGCACCAGACGCTGCAAGTGGGGCCGGCCGGGGCCGGGTGGGGCATGTGGAGATCGGAAGAGCGGTTTCAG      |
| chr13 | 32890675 | 32890714 | BRCA2_6275 | + | GTGACCTATGCACCAGACGTATTTTATAAATTTATAAATTACACCCGAGAAAGTGTTTTAGATCGGAAGAGCGGTTTCAG     |
| chr13 | 32900298 | 32900337 | BRCA2_6276 | + | GTGACCTATGCACCAGACGTAACAATGCTTTTTATTCTTAGAATACTAGAAATGTTAATAGATCGGAAGAGCGGTTTCAG     |
| chr13 | 32900430 | 32900469 | BRCA2_6277 | + | GTGACCTATGCACCAGACGTTACCTGGTTATTTTTATGACTTAGTAATGAGAATTTGAAGATCGGAAGAGCGGTTTCAG      |
| chr13 | 32900761 | 32900800 | BRCA2_6278 | + | GTGACCTATGCACCAGACGTCAAATGTGATTTTACAAGAAAGAGCAGATGAGGTTGATAAAGATCGGAAGAGCGGTTTCAG    |
| chr13 | 32903640 | 32903679 | BRCA2_6279 | + | GTGACCTATGCACCAGACGTATGACATTGATTAGACTGTTGAAATGCTAACAATTTGGAGATCGGAAGAGCGGTTTCAG      |
| chr13 | 32905178 | 32905217 | BRCA2_6280 | + | GTGACCTATGCACCAGACGTTGTTTAGTTGAACACAGGTTTTTTTTGTTGTTGTTGTTTATAGATCGGAAGAGCGGTTTCAG   |
| chr13 | 32907535 | 32907574 | BRCA2_6281 | + | GTGACCTATGCACCAGACGCTTTTTTTTTTTGTAATAAGTACATATAGTTTTATAGATGAGATCGGAAGAGCGGTTTCAG     |
| chr13 | 32915344 | 32915383 | BRCA2_6282 | + | GTGACCTATGCACCAGACGTATTTTTTACCTTTCGTGTGGCAACTCACTATTTTTAAAGTGAGATCGGAAGAGCGGTTTCAG   |
| chr13 | 32918801 | 32918840 | BRCA2_6283 | + | GTGACCTATGCACCAGACGCTTTTTTATTTATCTGTTCTCCCTATAGGTATGGTATAGATCGGAAGAGCGGTTTCAG        |
| chr13 | 32921044 | 32921083 | BRCA2_6284 | + | GTGACCTATGCACCAGACGTTTTAAATTTTTCTAAATTTCTAATACAGTATGAGAAAAGTCAGATCGGAAGAGCGGTTTCAG   |
| chr13 | 32929436 | 32929475 | BRCA2_6285 | + | GTGACCTATGCACCAGACGTACAATTTGTGTGATGAATTTTTGCCTTTTAGATGATGATCGGAAGAGCGGTTTCAG         |
| chr13 | 32930757 | 32930796 | BRCA2_6286 | + | GTGACCTATGCACCAGACGTGCTACAATACTGATGGCTTTTATGACAGAGTGAATTTTATAGATCGGAAGAGCGGTTTCAG    |
| chr13 | 32932077 | 32932116 | BRCA2_6287 | + | GTGACCTATGCACCAGACGTCAAAAGATTGTGTGTTAACTTTTATGCTATCCCTCATCGATCGGAAGAGCGGTTTCAG       |
| chr13 | 32936841 | 32936880 | BRCA2_6288 | + | GTGACCTATGCACCAGACGTAGCATGATTTACGTAACTATACGCAATGAGTTAAGAGATCGGAAGAGCGGTTTCAG         |
| chr13 | 32937681 | 32937720 | BRCA2_6289 | + | GTGACCTATGCACCAGACGTTTGCACCTCTGGTAAAATCAGTCATTGATTGATTAAATAGATCGGAAGAGCGGTTTCAG      |
| chr13 | 32944705 | 32944744 | BRCA2_6290 | + | GTGACCTATGCACCAGACGTTTCTTGAACCTTACCATATATTTCTTTCTTTGATACAATAGATCGGAAGAGCGGTTTCAG     |
| chr13 | 32945248 | 32945287 | BRCA2_6291 | + | GTGACCTATGCACCAGACGTTTATATGGTACACATTGTTATTTCTAATATGAGAACAAAGAGATCGGAAGAGCGGTTTCAG    |
| chr13 | 32950939 | 32950978 | BRCA2_6292 | + | GTGACCTATGCACCAGACGTAAGAGACATATAATGAGGCTTGATGATTATCAAGGTGAAGATCGGAAGAGCGGTTTCAG      |
| chr13 | 32953663 | 32953702 | BRCA2_6293 | + | GTGACCTATGCACCAGACGTAATGCTTTTGTATTTTATGCTTTTATTAACCTAAAAAATGAGATCGGAAGAGCGGTTTCAG    |
| chr13 | 32954061 | 32954100 | BRCA2_6294 | + | GTGACCTATGCACCAGACGTTTTCATTGTAATTTTTTTCAGTTTTGATAAGTGCTTGTGTTAGTATCGGAAGAGCGGTTTCAG  |
| chr13 | 32954293 | 32954332 | BRCA2_6295 | + | GTGACCTATGCACCAGACGTATATAGTTAAATTTTTTTTATTGATTCTTTTAAAAAACATTAGATCGGAAGAGCGGTTTCAG   |
| chr13 | 32969081 | 32969120 | BRCA2_6296 | + | GTGACCTATGCACCAGACGTTTTTTCAGCATACCACACATTTTGGTATTTTTCTATTTTGGATCGGAAGAGCGGTTTCAG     |
| chr13 | 32971192 | 32971231 | BRCA2_6297 | + | GTGACCTATGCACCAGACGTGTAACCTCAAGGAATATTATAAAGATATATGAGAGCCAGATCGGAAGAGCGGTTTCAG       |
| chr13 | 32972918 | 32972957 | BRCA2_6298 | + | GTGACCTATGCACCAGACGTAGGCAGCAATAAATTTTACGCTTAACTTTCCAGTTTAAAGATCGGAAGAGCGGTTTCAG      |
| chr13 | 32972613 | 32972652 | BRCA2_6299 | + | GTGACCTATGCACCAGACGTGACTGCTCAATTTTAAAAAATTTCAATGAAATTTTCTCTTTTGGATCGGAAGAGCGGTTTCAG  |
| chr13 | 32906791 | 32906830 | BRCA2_6300 | + | GTGACCTATGCACCAGACGTCGTGAATGGTCTCAACTAACCCTTTTTCAGGTCTAAATGGAAGATCGGAAGAGCGGTTTCAG   |
| chr13 | 32907163 | 32907202 | BRCA2_6301 | + | GTGACCTATGCACCAGACGTCGAATGCAAGTTTTTTCAGGTCTATGACTGATCCAACTTTTATAGATCGGAAGAGCGGTTTCAG |
| chr13 | 32910905 | 32910944 | BRCA2_6302 | + | GTGACCTATGCACCAGACGTTCTGATGTTGAATTAACCAAAAATATTTCCATGGAAAAGAAGATCGGAAGAGCGGTTTCAG    |
| chr13 | 32911398 | 32911437 | BRCA2_6303 | + | GTGACCTATGCACCAGACGTAAGATTTAAATCGGACATCTCCTTGAATATAGATAAAATAGATCGGAAGAGCGGTTTCAG     |
| chr13 | 32911891 | 32911930 | BRCA2_6304 | + | GTGACCTATGCACCAGACGTAAGCTACATATTGCAGAAGACTACATTTGAAGTGCTGAAAGATCGGAAGAGCGGTTTCAG     |
| chr13 | 32912384 | 32912423 | BRCA2_6305 | + | GTGACCTATGCACCAGACGTTTGAATGACTCTGGCCTTTTTGTTGAAGAAATTAAGTATCGGAAGAGCGGTTTCAG         |
| chr13 | 32912877 | 32912916 | BRCA2_6306 | + | GTGACCTATGCACCAGACGTTAAATCTGAATTACATTCTGACATAAGAAAGAACAAAATAGATCGGAAGAGCGGTTTCAG     |
| chr13 | 32913370 | 32913409 | BRCA2_6307 | + | GTGACCTATGCACCAGACGTTCTCAAAACATCAAAAAGTATCTTTTTGAAAGTTAAAGTAAGATCGGAAGAGCGGTTTCAG    |
| chr13 | 32913863 | 32913902 | BRCA2_6308 | + | GTGACCTATGCACCAGACGTATATCCAATGTAAGAATGCAAAATGCATACCCACAAAATGAGATCGGAAGAGCGGTTTCAG    |
| chr13 | 32914356 | 32914395 | BRCA2_6309 | + | GTGACCTATGCACCAGACGTCAGATATGTAATGTAGTATGGGAAGCTTCATAAGTCAGATCGGAAGAGCGGTTTCAG        |
| chr13 | 32914849 | 32914888 | BRCA2_6310 | + | GTGACCTATGCACCAGACGTCAGATAATGGAAAAACCTGCAGTAAAGAATTTAAATTAAGATCGGAAGAGCGGTTTCAG      |
| chr17 | 37856575 | 37856614 | ERBB2_6311 | + | GTGACCTATGCACCAGACGTTGTGGGGAGGGGACGGAGCAGCGGGCCGGACCCCTGCCCTGTAGATCGGAAGAGCGGTTTCAG  |
| chr17 | 37863405 | 37863444 | ERBB2_6312 | + | GTGACCTATGCACCAGACGTTGGGCAACCCAGCCAGGCCCTGCCTCCAGCTGGGCTGAGCAGATCGGAAGAGCGGTTTCAG    |
| chr17 | 37865716 | 37865755 | ERBB2_6313 | + | GTGACCTATGCACCAGACGTCCTCCCTGCTGCCTCTTCTCTCAGACAGCCTGACCCCAAGATCGGAAGAGCGGTTTCAG      |
| chr17 | 37866145 | 37866184 | ERBB2_6314 | + | GTGACCTATGCACCAGACGTTGGGAGGGCTGGAGTCAGGGAAGGGGAGGGCTGGGGCCGGGAGATCGGAAGAGCGGTTTCAG   |
| chr17 | 37866465 | 37866504 | ERBB2_6315 | + | GTGACCTATGCACCAGACGTCGTGTTTGTGCCAATTTGCTCTACCCCCAGGATGCAAGATCGGAAGAGCGGTTTCAG        |
| chr17 | 37866745 | 37866784 | ERBB2_6316 | + | GTGACCTATGCACCAGACGTTGGGAAGAACACAGTTTCTCATTTTGGTGGGAGGTTTTGTAGATCGGAAGAGCGGTTTCAG    |
| chr17 | 37868311 | 37868350 | ERBB2_6317 | + | GTGACCTATGCACCAGACGTAAGTCTGCCCCGAGGCCAGCTGCAGTTCCTGTCCCTCTGCGCAGATCGGAAGAGCGGTTTCAG  |
| chr17 | 37868712 | 37868751 | ERBB2_6318 | + | GTGACCTATGCACCAGACGTCACAGTACCTGAGACAGTGTGAGGCAGACAGAGTCTAGATCGGAAGAGCGGTTTCAG        |
| chr17 | 37871623 | 37871662 | ERBB2_6319 | + | GTGACCTATGCACCAGACGTTCTCTGCATCCTGTTCTGACAGGGGCTGGGAGTCTTGTCCAGATCGGAAGAGCGGTTTCAG    |
| chr17 | 37871800 | 37871839 | ERBB2_6320 | + | GTGACCTATGCACCAGACGTAGAAAGAGGGGGCTGATGGGGAGGATCCCAGGGAGGAGATCGGAAGAGCGGTTTCAG        |
| chr17 | 37872203 | 37872242 | ERBB2_6321 | + | GTGACCTATGCACCAGACGTTGGCCAGGTGCGCATCCCTATGCCAGCACACAGATCGGAAGAGCGGTTTCAG             |
| chr17 | 37872697 | 37872736 | ERBB2_6322 | + | GTGACCTATGCACCAGACGTCGAGGAGGGTGGCTGGAGGGTGCATGGGGCTCCTCTAGATCGGAAGAGCGGTTTCAG        |

|       |           |           |            |   |                                                                                    |
|-------|-----------|-----------|------------|---|------------------------------------------------------------------------------------|
| chr17 | 37872869  | 37872908  | ERBB2_6323 | + | GTGACCTATGCACCAGACGTGGCGGGCTCAGAGCTGGGTGGAGGGGGGCAGCGAGGGGGAAGATCGGAAGAGCGGTTTCAG  |
| chr17 | 37873744  | 37873783  | ERBB2_6324 | + | GTGACCTATGCACCAGACGTCGGTCTTTTCTGCAGAAAGGAGGACTTTCTTTTCAGGGGTAGATCGGAAGAGCGGTTTCAG  |
| chr17 | 37876098  | 37876137  | ERBB2_6325 | + | GTGACCTATGCACCAGACGTACCCAGGATGTACCCCTTCACTGCCCTTCACTCCCCACTAGATCGGAAGAGCGGTTTCAG   |
| chr17 | 37879721  | 37879760  | ERBB2_6326 | + | GTGACCTATGCACCAGACGTGTGAAGTCTCCAGCCCGCGTGGGGTCTGCACCGGCCCCAGATCGGAAGAGCGGTTTCAG    |
| chr17 | 37879924  | 37879963  | ERBB2_6327 | + | GTGACCTATGCACCAGACGTGGTCTCTGGGGTGGCGGGCCAGAGGATGGGGGCGGTGCCAGATCGGAAGAGCGGTTTCAG   |
| chr17 | 37880274  | 37880313  | ERBB2_6328 | + | GTGACCTATGCACCAGACGTCCACCCTCTCTGCTAGGAGGACAGGAAGGCCCTATGCCAGATCGGAAGAGCGGTTTCAG    |
| chr17 | 37881175  | 37881214  | ERBB2_6329 | + | GTGACCTATGCACCAGACGTGGGCTTTTGCAGGTCCTCCGGCAAACCCCTATGTCCAGATCGGAAGAGCGGTTTCAG      |
| chr17 | 37881468  | 37881507  | ERBB2_6330 | + | GTGACCTATGCACCAGACGTGGACCAAGGAGCAGAGGAGGCTGGTGGAGTGGTGTCTAGAGATCGGAAGAGCGGTTTCAG   |
| chr17 | 37881666  | 37881705  | ERBB2_6331 | + | GTGACCTATGCACCAGACGTGGGGGTGTTGGGAGGGTGGGTGAGGAGCCATGGCTGGAGAGATCGGAAGAGCGGTTTCAG   |
| chr17 | 37882117  | 37882156  | ERBB2_6332 | + | GTGACCTATGCACCAGACGTGAGCTGTGCTGGCTGCTGGAGGAGGGTGGGAGGTCTGGAGATCGGAAGAGCGGTTTCAG    |
| chr17 | 37882923  | 37882962  | ERBB2_6333 | + | GTGACCTATGCACCAGACGTTCTGTGCCCATCCTGCCTGTGGCTAAGAGCACCCCTCCTAGATCGGAAGAGCGGTTTCAG   |
| chr17 | 37883267  | 37883306  | ERBB2_6334 | + | GTGACCTATGCACCAGACGTTCCGTACACTGTGTGGCTGTCTGCTTACCTCCCCAACCCAGATCGGAAGAGCGGTTTCAG   |
| chr17 | 37883811  | 37883850  | ERBB2_6335 | + | GTGACCTATGCACCAGACGTGAAGTCAACAGCAGAGACTGATGGCAGGGGAGGTGGGACAGATCGGAAGAGCGGTTTCAG   |
| chr17 | 37884308  | 37884347  | ERBB2_6336 | + | GTGACCTATGCACCAGACGTCAAGTCCGCAAGCCCTGATGTGTCTCAGGGAGCAGGGAGATCGGAAGAGCGGTTTCAG     |
| chr7  | 140439757 | 140439796 | BRAF_6337  | + | GTGACCTATGCACCAGACGTAAAAAAGGGAATAATTCAACCTTGTAGATAAGTTGAAAGATCGGAAGAGCGGTTTCAG     |
| chr7  | 140449229 | 140449268 | BRAF_6338  | + | GTGACCTATGCACCAGACGTATACAAAGAAAATATCTTCACTTCAATTGAATAAAGACAGATCGGAAGAGCGGTTTCAG    |
| chr7  | 140453204 | 140453243 | BRAF_6339  | + | GTGACCTATGCACCAGACGTGAAGTAAAGGAAAAACAGTAGATCTCAATTTTCTATCAGAAGATCGGAAGAGCGGTTTCAG  |
| chr7  | 140454044 | 140454083 | BRAF_6340  | + | GTGACCTATGCACCAGACGTGAAGTCAATTTAACTGAGTAGGGCTAAAGGACTCTGGACAGATCGGAAGAGCGGTTTCAG   |
| chr7  | 140476899 | 140476938 | BRAF_6341  | + | GTGACCTATGCACCAGACGTAAATGTGACAGTAAACATTAATATGTCGACAAACTTTAGCAAGATCGGAAGAGCGGTTTCAG |
| chr7  | 140477886 | 140477925 | BRAF_6342  | + | GTGACCTATGCACCAGACGTATTGTTACTCCAAGTGTCAATTTCAATTTTTAAAATTTAAAAGATCGGAAGAGCGGTTTCAG |
| chr7  | 140481504 | 140481543 | BRAF_6343  | + | GTGACCTATGCACCAGACGTACAGTAAAAAAGTCAAGTCAAGCCAAACAGAAAAAGAAAAAGATCGGAAGAGCGGTTTCAG  |
| chr7  | 140482968 | 140483007 | BRAF_6344  | + | GTGACCTATGCACCAGACGTGAAAAGAAAAATGTATACATTAAGGAGGAGCAAGTATGTTAGATCGGAAGAGCGGTTTCAG  |
| chr7  | 140487395 | 140487434 | BRAF_6345  | + | GTGACCTATGCACCAGACGTATAGTAATGTATATTTATCCAAGCAAGCATATAATCAGAAGATCGGAAGAGCGGTTTCAG   |
| chr7  | 140494278 | 140494317 | BRAF_6346  | + | GTGACCTATGCACCAGACGTGAAGTCAATTTGGAAGATGAAGTCAAGTAAACGATATAAAGAGATCGGAAGAGCGGTTTCAG |
| chr7  | 140500292 | 140500331 | BRAF_6347  | + | GTGACCTATGCACCAGACGTAAACAAAACAACTTAACCTTGTGCAAAACCCAGAAGCTTCAGATCGGAAGAGCGGTTTCAG  |
| chr7  | 140501371 | 140501410 | BRAF_6348  | + | GTGACCTATGCACCAGACGTAAAAATCACAGAGATTTCAAAAACCTACAAGAAAACCTTCAGATCGGAAGAGCGGTTTCAG  |
| chr7  | 140507873 | 140507912 | BRAF_6349  | + | GTGACCTATGCACCAGACGTGACACACAGCCTTTCTTGGTTATTACACCTAAAAATATTAGATCGGAAGAGCGGTTTCAG   |
| chr7  | 140508806 | 140508845 | BRAF_6350  | + | GTGACCTATGCACCAGACGTATAAATATATGATAAGGTAAGGGAGCAAATACATTAGATCGGAAGAGCGGTTTCAG       |
| chr7  | 140534683 | 140534722 | BRAF_6351  | + | GTGACCTATGCACCAGACGTAAAGCATTATATTAAGTCCGGACTTTGTCTGACATTAAGATCGGAAGAGCGGTTTCAG     |
| chr7  | 140550023 | 140550062 | BRAF_6352  | + | GTGACCTATGCACCAGACGTAAACAAAAGATTTAAATAAAAATCACTTAGTATGAATAGATCGGAAGAGCGGTTTCAG     |
| chr4  | 153244312 | 153244351 | FBXW7_6353 | + | GTGACCTATGCACCAGACGTACCAAAAAGATTTAATTACTGGTTAGAATAATGGCTATGAGATCGGAAGAGCGGTTTCAG   |
| chr4  | 153245557 | 153245596 | FBXW7_6354 | + | GTGACCTATGCACCAGACGTACAGTATTATAGAATAGAAGTATGGACTCTTCTATCAGATCGGAAGAGCGGTTTCAG      |
| chr4  | 153247394 | 153247433 | FBXW7_6355 | + | GTGACCTATGCACCAGACGTAGAAACAGAAAAACAAAACAAAACAAAACCCACGTTTAGATCGGAAGAGCGGTTTCAG     |
| chr4  | 153249552 | 153249591 | FBXW7_6356 | + | GTGACCTATGCACCAGACGTACTAAGATGATTACTTTTGGGTAGAAAGGAAAAGTATTAGATCGGAAGAGCGGTTTCAG    |
| chr4  | 153250948 | 153250987 | FBXW7_6357 | + | GTGACCTATGCACCAGACGTGATGTGCAGATAGAAATGTTAATTAATTTATGTTCTTAGATCGGAAGAGCGGTTTCAG     |
| chr4  | 153252031 | 153252070 | FBXW7_6358 | + | GTGACCTATGCACCAGACGTACAGTTCAAGAGTAAATTCCTTACCATAATAACAGTTAGATCGGAAGAGCGGTTTCAG     |
| chr4  | 153259099 | 153259138 | FBXW7_6359 | + | GTGACCTATGCACCAGACGTGAATTAGAAATTTTTATTGTTTTAACAGATGTCCCAAATTAGATCGGAAGAGCGGTTTCAG  |
| chr4  | 153271287 | 153271326 | FBXW7_6360 | + | GTGACCTATGCACCAGACGTAAACAAAACAGATATGTTTTTAAAAATCGTCTAATCATTAGATCGGAAGAGCGGTTTCAG   |
| chr4  | 153273893 | 153273932 | FBXW7_6361 | + | GTGACCTATGCACCAGACGTAGCTTGACTGAGAAGAAGCTCGAGGGAATAATGAGAGAGAAAGATCGGAAGAGCGGTTTCAG |
| chr4  | 153303498 | 153303537 | FBXW7_6362 | + | GTGACCTATGCACCAGACGTCTCTGGTTGACGAATACTCTACATGTAATACAGGCACAGATCGGAAGAGCGGTTTCAG     |
| chr4  | 153332966 | 153333005 | FBXW7_6363 | + | GTGACCTATGCACCAGACGTGACTTGTACTTCTTGACACTTCTGGCTAGACTATCAGAAGAGATCGGAAGAGCGGTTTCAG  |
| chr3  | 37035165  | 37035204  | MLH1_6364  | + | GTGACCTATGCACCAGACGTAGTCGAGCCGGGCTCACTTAAAGGGCTACGACTTAAAGGGCAGATCGGAAGAGCGGTTTCAG |
| chr3  | 37038211  | 37038250  | MLH1_6365  | + | GTGACCTATGCACCAGACGTCTCAAAGTAGCAGGATGTTGTGCGCTTCATGGAAGAGTAGATCGGAAGAGCGGTTTCAG    |
| chr3  | 37042555  | 37042594  | MLH1_6366  | + | GTGACCTATGCACCAGACGTGATTCAAGAAATGTGTAATAATCTCCTGTGATGACATTAGATCGGAAGAGCGGTTTCAG    |
| chr3  | 37045976  | 37046015  | MLH1_6367  | + | GTGACCTATGCACCAGACGTGACTTCTTTACTCATATATATTCATTTCAAATGTATTTAGATCGGAAGAGCGGTTTCAG    |
| chr3  | 37048565  | 37048604  | MLH1_6368  | + | GTGACCTATGCACCAGACGTACTAGCAGAGTAAATTTGGAAGCTTTGTTGTATAAAGATCGGAAGAGCGGTTTCAG       |
| chr3  | 37050407  | 37050446  | MLH1_6369  | + | GTGACCTATGCACCAGACGTAAATCTGGGAGTGGGTCTCTGAGATTTGTCATCAAAGTAAAGATCGGAAGAGCGGTTTCAG  |
| chr3  | 37053364  | 37053403  | MLH1_6370  | + | GTGACCTATGCACCAGACGTGGTTTATGGGGATGGTTTTGTTTTATGAAAAGAAAAAGAGATCGGAAGAGCGGTTTCAG    |
| chr3  | 37053601  | 37053640  | MLH1_6371  | + | GTGACCTATGCACCAGACGTAACTTATATAAAAAATCTTTTACATTTATTATCTTGGTTAGATCGGAAGAGCGGTTTCAG   |
| chr3  | 37056046  | 37056085  | MLH1_6372  | + | GTGACCTATGCACCAGACGTAAAGAACACATGGGAAATCCACTCACAGGAAACACCCACAAGATCGGAAGAGCGGTTTCAG  |
| chr3  | 37059101  | 37059140  | MLH1_6373  | + | GTGACCTATGCACCAGACGTAACTTCTCAACCAAGACTACAAGGAAACAGATGTTAGATCGGAAGAGCGGTTTCAG       |
| chr3  | 37061965  | 37062004  | MLH1_6374  | + | GTGACCTATGCACCAGACGTCTTCTCATCAGTACTTCTCTGCGGCTTTGAAATGTGCCAGATCGGAAGAGCGGTTTCAG    |
| chr3  | 37067509  | 37067548  | MLH1_6375  | + | GTGACCTATGCACCAGACGTTTTGGGAAAAGTACAGCCTACCTCTTTATTCTGTAATAAAGATCGGAAGAGCGGTTTCAG   |
| chr3  | 37070434  | 37070473  | MLH1_6376  | + | GTGACCTATGCACCAGACGTGCTGTGGCCTGCCTGGGATGCATAGGGCCTCAACTGCCAAAGATCGGAAGAGCGGTTTCAG  |
| chr3  | 37081796  | 37081835  | MLH1_6377  | + | GTGACCTATGCACCAGACGTTGAGTGTGTAACAGCAGAGCTACTACAACAATGGTCCAAGATCGGAAGAGCGGTTTCAG    |
| chr3  | 37083833  | 37083872  | MLH1_6378  | + | GTGACCTATGCACCAGACGTACTTTTCACTTCTGAAATTTCAACTGATCGTTTCTGAAAGATCGGAAGAGCGGTTTCAG    |
| chr3  | 37089185  | 37089224  | MLH1_6379  | + | GTGACCTATGCACCAGACGTCATTTTACTCTTGTGTTTCTTCAAATAAATTTCCAGATCGGAAGAGCGGTTTCAG        |
| chr3  | 37090111  | 37090150  | MLH1_6380  | + | GTGACCTATGCACCAGACGTAAAGCAGTAACTAAGCATTTCGGTACATGCATGTGTCTGGAGATCGGAAGAGCGGTTTCAG  |

|       |          |          |             |   |                                                                                        |
|-------|----------|----------|-------------|---|----------------------------------------------------------------------------------------|
| chr3  | 37090519 | 37090558 | MLH1_6381   | + | GTGACCTATGCACCAGACGTGATGCACACTGGCACCCAGGACTAGGACAGGACCTCATAAGATCGGAAGAGCGGTTTCAG       |
| chr3  | 37092155 | 37092194 | MLH1_6382   | + | GTGACCTATGCACCAGACGTTTATGCACTGTGGGATGTGTTCTTCTTCTCTGATTCCGAGATCGGAAGAGCGGTTTCAG        |
| chr2  | 47630552 | 47630591 | MSH2_6383   | + | GTGACCTATGCACCAGACGTGGACGGCGCGTCTGGGGAGGGACCCGGGGCCTTGTTGGCGAGATCGGAAGAGCGGTTTCAG      |
| chr2  | 47635705 | 47635744 | MSH2_6384   | + | GTGACCTATGCACCAGACGTTCCTTTTTAATTTACTTATTTTTTTAAGAGTAGAAAAATAAGATCGGAAGAGCGGTTTCAG      |
| chr2  | 47637522 | 47637561 | MSH2_6385   | + | GTGACCTATGCACCAGACGTTGAGTCTAGTGATAGAGGAGATCCAGGCCCTAGGAAAGGCAGATCGGAAGAGCGGTTTCAG      |
| chr2  | 47643579 | 47643618 | MSH2_6386   | + | GTGACCTATGCACCAGACGTAGTTTTATACTTTCTGTTAGTTTTTGAACCTGCAGTTACCAGATCGGAAGAGCGGTTTCAG      |
| chr2  | 47657091 | 47657130 | MSH2_6387   | + | GTGACCTATGCACCAGACGTTATTTTTGTTTTTTTTGTTTTTCCCTCAACTACATAATATATAAGATCGGAAGAGCGGTTTCAG   |
| chr2  | 47672807 | 47672846 | MSH2_6388   | + | GTGACCTATGCACCAGACGTTACTTTTTTAATTTAAGCAGTAGTTATTTTTAAAAAGCAAAGATCGGAAGAGCGGTTTCAG      |
| chr2  | 47690304 | 47690343 | MSH2_6389   | + | GTGACCTATGCACCAGACGTGCATTGGAGGTTGGAATAATCTTTTGTCTATACACTGTAGATCGGAAGAGCGGTTTCAG        |
| chr2  | 47693958 | 47693997 | MSH2_6390   | + | GTGACCTATGCACCAGACGTCGTTATATATTTTTAACCCTTTATTAATCCCTAAATGCAGATCGGAAGAGCGGTTTCAG        |
| chr2  | 47698212 | 47698251 | MSH2_6391   | + | GTGACCTATGCACCAGACGTTAGAACTAATAATGTTCTGAATGTCACCTGGCTTTTGGTAAGATCGGAAGAGCGGTTTCAG      |
| chr2  | 47703721 | 47703760 | MSH2_6392   | + | GTGACCTATGCACCAGACGTCCTAGTCCCTTGAAGATGAAATGTATGTCTGTCTGTCTAGATCGGAAGAGCGGTTTCAG        |
| chr2  | 47705669 | 47705708 | MSH2_6393   | + | GTGACCTATGCACCAGACGTTTGGAGTCTCTAAATTCAGAACTTGGTAATGGGAAACTTAGATCGGAAGAGCGGTTTCAG       |
| chr2  | 47708021 | 47708060 | MSH2_6394   | + | GTGACCTATGCACCAGACGTTTGTTCATAGTTAACTTAGCTTCTCTATTATTACATAAGATCGGAAGAGCGGTTTCAG         |
| chr2  | 47710099 | 47710138 | MSH2_6395   | + | GTGACCTATGCACCAGACGTTAATGGAATGAAGGTAATATTGATAAGCTATTGTCTGTAAGATCGGAAGAGCGGTTTCAG       |
| chr18 | 48573676 | 48573715 | SMAD4_6396  | + | GTGACCTATGCACCAGACGTTAAGAGTTTTCTATACCCTCTATGGTGGCAGATTTAAAAAGATCGGAAGAGCGGTTTCAG       |
| chr18 | 48575241 | 48575280 | SMAD4_6397  | + | GTGACCTATGCACCAGACGTTTTGTCTTCACTTCACTAAAGAACATAAAGGGAAAAAGGATCTCAGATCGGAAGAGCGGTTTCAG  |
| chr18 | 48575705 | 48575744 | SMAD4_6398  | + | GTGACCTATGCACCAGACGTTGTTCTTACTACTTTCTCTTTGTTTTGTCTATCCTCTCAGATCGGAAGAGCGGTTTCAG        |
| chr18 | 48581374 | 48581413 | SMAD4_6399  | + | GTGACCTATGCACCAGACGTGAATCAGATGTAGTCAGCAAGTTGAGTTTTCCATAATCATTAGATCGGAAGAGCGGTTTCAG     |
| chr18 | 48584625 | 48584664 | SMAD4_6400  | + | GTGACCTATGCACCAGACGTACTTTAAAAAATCTTTAAATAGTTGAGAAAAAGTAGGCAGATCGGAAGAGCGGTTTCAG        |
| chr18 | 48584837 | 48584876 | SMAD4_6401  | + | GTGACCTATGCACCAGACGTGTTTTGTTGTAAGGGCTATTTTTTTTTTTTTTTTGGTAGAGATCGGAAGAGCGGTTTCAG       |
| chr18 | 48586297 | 48586336 | SMAD4_6402  | + | GTGACCTATGCACCAGACGTTTCAAATGATTTCTGTATTTAGATTGATTTAGTGGTGGATCGGAAGAGCGGTTTCAG          |
| chr18 | 48591987 | 48592026 | SMAD4_6403  | + | GTGACCTATGCACCAGACGTTATAGTCAGATGTTACTTTAAAAAATGAGCATAGTCAAGATCGGAAGAGCGGTTTCAG         |
| chr18 | 48593607 | 48593646 | SMAD4_6404  | + | GTGACCTATGCACCAGACGTATTTTTGAAATTTTTAGAACTTTAGACTTAAAGCTCTATTTGTTGAGATCGGAAGAGCGGTTTCAG |
| chr18 | 48603157 | 48603196 | SMAD4_6405  | + | GTGACCTATGCACCAGACGTTTTTTCATTCTTTTTTAAAGGTATAATAGTTGATATTTTTAAGATCGGAAGAGCGGTTTCAG     |
| chr18 | 48604848 | 48604887 | SMAD4_6406  | + | GTGACCTATGCACCAGACGTGTTGGGGCCCTTAACCTTATCAGGATGGTGGACTACAAAAGATCGGAAGAGCGGTTTCAG       |
| chr9  | 22006257 | 22006296 | CDKN2B_6407 | + | GTGACCTATGCACCAGACGTGAGCAGAGTGGTCAGAGCCAGGGTGGGGCCAGGTATGGGAAGATCGGAAGAGCGGTTTCAG      |
| chr9  | 22008963 | 22009002 | CDKN2B_6408 | + | GTGACCTATGCACCAGACGTCCAGACCGCAGCGCCCGGATAATCCACCGTTGGCCGTAAGATCGGAAGAGCGGTTTCAG        |
| chr4  | 1795781  | 1795820  | FGFR3_6409  | + | GTGACCTATGCACCAGACGTACCCACTAGCCAGCGGAGAGCCGGCTGCGGGCAGAGATCGGAAGAGCGGTTTCAG            |
| chr4  | 1801261  | 1801300  | FGFR3_6410  | + | GTGACCTATGCACCAGACGTGGGCCAGCCAGCTTACAGAAAGGAGCCGAGTCCCGGCTCAGATCGGAAGAGCGGTTTCAG       |
| chr4  | 1801550  | 1801589  | FGFR3_6411  | + | GTGACCTATGCACCAGACGTGGTCCAGGGTTTCAGGCCAGCCGGGGTGGGGCCCGCTGCCAAGATCGGAAGAGCGGTTTCAG     |
| chr4  | 1803274  | 1803313  | FGFR3_6412  | + | GTGACCTATGCACCAGACGTGCGGGTGGCTCTGGCCCTGGCAGGCGCGGTGGTTGCTGCCAGATCGGAAGAGCGGTTTCAG      |
| chr4  | 1803763  | 1803802  | FGFR3_6413  | + | GTGACCTATGCACCAGACGTGTGTGCACGTGGCTGCCCGCTGGGGCTCCTGGGCTGGCAGATCGGAAGAGCGGTTTCAG        |
| chr4  | 1805574  | 1805613  | FGFR3_6414  | + | GTGACCTATGCACCAGACGTGCTGCTGCTGCTGCCCTCCGCACTGTCTGGGGGAGCGTGGAGATCGGAAGAGCGGTTTCAG      |
| chr4  | 1806258  | 1806297  | FGFR3_6415  | + | GTGACCTATGCACCAGACGTGTAGTACCAGGTTCTGAGCTTCCAGGCTGCCGCCAGGCTCCAGATCGGAAGAGCGGTTTCAG     |
| chr4  | 1806707  | 1806746  | FGFR3_6416  | + | GTGACCTATGCACCAGACGTCTGAGGGCCAGCGTTGGCTGTAGGGGGCTTGGTGGTGGGGAGATCGGAAGAGCGGTTTCAG      |
| chr4  | 1807214  | 1807253  | FGFR3_6417  | + | GTGACCTATGCACCAGACGTGGCGGCCAGGGTGCAGAGCAGGGCTGGGGCCGCCGCCAGATCGGAAGAGCGGTTTCAG         |
| chr4  | 1807407  | 1807446  | FGFR3_6418  | + | GTGACCTATGCACCAGACGTTAGCGCGGTGGTGGCCGCTGGGGCCGCCCTCCTGGGCTGAGATCGGAAGAGCGGTTTCAG       |
| chr4  | 1807678  | 1807717  | FGFR3_6419  | + | GTGACCTATGCACCAGACGTGGCCAGGTGTGGTGGAGTAGGCTGGGCCCTGCCCTGAGAAGATCGGAAGAGCGGTTTCAG       |
| chr4  | 1807911  | 1807950  | FGFR3_6420  | + | GTGACCTATGCACCAGACGTCCCTGGGGTGGGGGTGGGGGTGATGCCAGTAGGACGCGGATCGGAAGAGCGGTTTCAG         |
| chr4  | 1808065  | 1808104  | FGFR3_6421  | + | GTGACCTATGCACCAGACGTGGCAGAGCTCAGGCTTTCAGGGGTGGAGCCGGAACTGGGCAGATCGGAAGAGCGGTTTCAG      |
| chr4  | 1808421  | 1808460  | FGFR3_6422  | + | GTGACCTATGCACCAGACGTTCCCTGGCCCTCCACTGGGTCTCAGGGGTGGGGTCCCTAGATCGGAAGAGCGGTTTCAG        |
| chr4  | 1808672  | 1808711  | FGFR3_6423  | + | GTGACCTATGCACCAGACGTGCTCTGGCCTGGTGCCACCCGCTATGCCCTCCCCCTGCAGATCGGAAGAGCGGTTTCAG        |
| chr4  | 1809000  | 1809039  | FGFR3_6424  | + | GTGACCTATGCACCAGACGTGCCCAACAATGTGAGGGGTCCCTAGCAGCCACCCTGCAGATCGGAAGAGCGGTTTCAG         |
| chr2  | 48010643 | 48010682 | MSH6_6425   | + | GTGACCTATGCACCAGACGTGGGGGTGGGGTGGAGCGGGGGCATAGCGGGCGGGGCTAGATCGGAAGAGCGGTTTCAG         |
| chr2  | 48023213 | 48023252 | MSH6_6426   | + | GTGACCTATGCACCAGACGTGCAAGCATTGATTTGTTAGGGTATGGGGAAAGATCGGAAGAGCGGTTTCAG                |
| chr2  | 48028305 | 48028344 | MSH6_6427   | + | GTGACCTATGCACCAGACGTGAACAAGCTTGTCTCAGGCTTTGATAAGTAGTGTGTTTATAGATCGGAAGAGCGGTTTCAG      |
| chr2  | 48030835 | 48030874 | MSH6_6428   | + | GTGACCTATGCACCAGACGTCTTAAAGTTTTGTTATCAGAAAGTCAATTTGTGACATTAGGAGATCGGAAGAGCGGTTTCAG     |
| chr2  | 48032177 | 48032216 | MSH6_6429   | + | GTGACCTATGCACCAGACGTTGTTCCCACTTAAAGTTCTCATTAGTCAATTTAGATGTGAAGATCGGAAGAGCGGTTTCAG      |
| chr2  | 48032857 | 48032896 | MSH6_6430   | + | GTGACCTATGCACCAGACGTAAACTTCTCATTTGAAGACTTATCTTAAAAACATTTGAGATCGGAAGAGCGGTTTCAG         |
| chr2  | 48033508 | 48033547 | MSH6_6431   | + | GTGACCTATGCACCAGACGTATTTGTTTTTCCCAAATTCGGTTTTTGGAGGGCACTAGATCGGAAGAGCGGTTTCAG          |
| chr2  | 48033801 | 48033840 | MSH6_6432   | + | GTGACCTATGCACCAGACGTTAACTATAAGTAATTAATACTAACTTAACTTAAAGTTTCAAAGATCGGAAGAGCGGTTTCAG     |
| chr2  | 48034010 | 48034049 | MSH6_6433   | + | GTGACCTATGCACCAGACGTTTGAAGCTTTGAGTTGACTTCTGACAAAGGTGGTAAATTAGATCGGAAGAGCGGTTTCAG       |
| chr2  | 48026184 | 48026223 | MSH6_6434   | + | GTGACCTATGCACCAGACGTAGGTGGTGTGATGACAGTAGTCGCCCTACTGTTTGGTATCATAGATCGGAAGAGCGGTTTCAG    |
| chr2  | 48026608 | 48026647 | MSH6_6435   | + | GTGACCTATGCACCAGACGTTGTAGAAAGATGGCACATATCCAAGTATGATAGAGTGGAGATCGGAAGAGCGGTTTCAG        |
| chr2  | 48027032 | 48027071 | MSH6_6436   | + | GTGACCTATGCACCAGACGTTCCCTGAGGAAGAATTTTTAGGGAAAGCTAAGTGTAGGATCGGAAGAGCGGTTTCAG          |
| chr2  | 48027456 | 48027495 | MSH6_6437   | + | GTGACCTATGCACCAGACGTTTGGCCCACTTGTAACTTGTAACTTATTAATGATCGGAAGAGCGGTTTCAG                |
| chr2  | 48027880 | 48027919 | MSH6_6438   | + | GTGACCTATGCACCAGACGTGAGGCTCGAAAGACTGACCTTATTACTCCAAAGCAGGCTAGATCGGAAGAGCGGTTTCAG       |

|      |           |           |             |   |                                                                                     |
|------|-----------|-----------|-------------|---|-------------------------------------------------------------------------------------|
| chr3 | 138374379 | 138374418 | PIK3CB_6439 | + | GTGACCTATGCACCAGACGTAGGGGGGAAAATATGATTTTATATAACTTTAGTAGAGATGTAGATCGGAAGAGCGGTTTCAG  |
| chr3 | 138375127 | 138375166 | PIK3CB_6440 | + | GTGACCTATGCACCAGACGTTGCAGCAAACCACATGAGCACAGTGTAGAGGGGAGAGAGAGATCGGAAGAGCGGTTTCAG    |
| chr3 | 138376688 | 138376727 | PIK3CB_6441 | + | GTGACCTATGCACCAGACGTAATGGGATTTAATTTCCCTTCATTTTTCTGGTGGGTTCCAAAGATCGGAAGAGCGGTTTCAG  |
| chr3 | 138382882 | 138382921 | PIK3CB_6442 | + | GTGACCTATGCACCAGACGTGAAAAGAACAAGCAAAAAGGTTTTCAGCCTCCAAGCGAGATCGGAAGAGCGGTTTCAG      |
| chr3 | 138384056 | 138384095 | PIK3CB_6443 | + | GTGACCTATGCACCAGACGTAAAAATGGGCATAGAGTCATATTTTCTTAAAAATGAAACAAGATCGGAAGAGCGGTTTCAG   |
| chr3 | 138400898 | 138400937 | PIK3CB_6444 | + | GTGACCTATGCACCAGACGTACAACTGCTTCATTACAAGTGCCTTTTCTTTTATGCCCTAGATCGGAAGAGCGGTTTCAG    |
| chr3 | 138402640 | 138402679 | PIK3CB_6445 | + | GTGACCTATGCACCAGACGTGGGGGAAAATAGTCAAGTGTCAATGATACAGAAAGATCGGAAGAGCGGTTTCAG          |
| chr3 | 138403656 | 138403695 | PIK3CB_6446 | + | GTGACCTATGCACCAGACGTAGTTCCCCACACAAAAATTCATTTGACTAAAAGTAATATAGATCGGAAGAGCGGTTTCAG    |
| chr3 | 138407827 | 138407866 | PIK3CB_6447 | + | GTGACCTATGCACCAGACGTTTATGATATCTGAACAGTTTGTATCAACACTTCAGAAGATCGGAAGAGCGGTTTCAG       |
| chr3 | 138409996 | 138410035 | PIK3CB_6448 | + | GTGACCTATGCACCAGACGTCAAAAGACACAGTGAAGTAAACAAACACCTGTGCCAGAAAAGATCGGAAGAGCGGTTTCAG   |
| chr3 | 138413760 | 138413799 | PIK3CB_6449 | + | GTGACCTATGCACCAGACGTAATGAAACTGGTTCAGAATAATGGGGGACAAAAGTAATCAGATCGGAAGAGCGGTTTCAG    |
| chr3 | 138417948 | 138417987 | PIK3CB_6450 | + | GTGACCTATGCACCAGACGTAATGCTCATTATAGAATTTAATGTGCAAAACCCACAGAGATCGGAAGAGCGGTTTCAG      |
| chr3 | 138423346 | 138423385 | PIK3CB_6451 | + | GTGACCTATGCACCAGACGTAAAATTAAGAAAATGAATTTGGCTCTCATATTTGTGAAAAGATCGGAAGAGCGGTTTCAG    |
| chr3 | 138426142 | 138426181 | PIK3CB_6452 | + | GTGACCTATGCACCAGACGTCAATAATTTTGGTCTTAAAAAATGCTTTAAACTAGGAGATCGGAAGAGCGGTTTCAG       |
| chr3 | 138431157 | 138431196 | PIK3CB_6453 | + | GTGACCTATGCACCAGACGTAGATACCATTGCATAAATATGCTAAGAATAACTTTAAGGTAGATCGGAAGAGCGGTTTCAG   |
| chr3 | 138433572 | 138433611 | PIK3CB_6454 | + | GTGACCTATGCACCAGACGTGCAGACAAAACAAAACAAAGTCATGAATACTGTACCACAGATCGGAAGAGCGGTTTCAG     |
| chr3 | 138452291 | 138452330 | PIK3CB_6455 | + | GTGACCTATGCACCAGACGTATAAAAATAAATCAAAATTTTAAATGAAGAAAATGAATAAAGATCGGAAGAGCGGTTTCAG   |
| chr3 | 138453657 | 138453696 | PIK3CB_6456 | + | GTGACCTATGCACCAGACGTAAAAGGAAAGGATGATTTTTCATGCCAACACCTAAAAGATCGGAAGAGCGGTTTCAG       |
| chr3 | 138456739 | 138456778 | PIK3CB_6457 | + | GTGACCTATGCACCAGACGTAGGGAGATGGGAAAAAAGCAGTAATGTTATATTATGCAGATCGGAAGAGCGGTTTCAG      |
| chr3 | 138461634 | 138461673 | PIK3CB_6458 | + | GTGACCTATGCACCAGACGTTTTTAAAGGTGTCATTTTCAGTAACTAACAAATAAAAAAGATCGGAAGAGCGGTTTCAG     |
| chr3 | 138478196 | 138478235 | PIK3CB_6459 | + | GTGACCTATGCACCAGACGTGGGGCCCTAGAAAATCAGTAATTAACAACATAGCAAAAACACAGATCGGAAGAGCGGTTTCAG |
| chr5 | 67522848  | 67522887  | PIK3R1_6460 | + | GTGACCTATGCACCAGACGTATAAGTGGTGTCTAATGACTCCCTTTCTTTTTCTTTTTAAGATCGGAAGAGCGGTTTCAG    |
| chr5 | 67569321  | 67569360  | PIK3R1_6461 | + | GTGACCTATGCACCAGACGTTGCTAGAGGGCATCGTTCCTTTGTTCTACCCCTATTTCAAGATCGGAAGAGCGGTTTCAG    |
| chr5 | 67569852  | 67569891  | PIK3R1_6462 | + | GTGACCTATGCACCAGACGTGCAGATGAGAAATGCAAAATGGGAAAGACAGGCTTTGGCTTAGATCGGAAGAGCGGTTTCAG  |
| chr5 | 67575572  | 67575611  | PIK3R1_6463 | + | GTGACCTATGCACCAGACGTTCTCTTCTGGGAACCTCATTGAACATACATGGAGATGTAGAGATCGGAAGAGCGGTTTCAG   |
| chr5 | 67576568  | 67576607  | PIK3R1_6464 | + | GTGACCTATGCACCAGACGTGGAGACAAACATGTATTTGGGGTGATGAGGGTAGTCCCTAAGATCGGAAGAGCGGTTTCAG   |
| chr5 | 67576845  | 67576884  | PIK3R1_6465 | + | GTGACCTATGCACCAGACGTTTGAGCATTTAACATTCTCTCATTTGTTCATTTTTAGAGCAGATCGGAAGAGCGGTTTCAG   |
| chr5 | 67584629  | 67584668  | PIK3R1_6466 | + | GTGACCTATGCACCAGACGTTTGAATTTGTGACCTCTCTGTTCTTATCTGAGCGGTGCAGATCGGAAGAGCGGTTTCAG     |
| chr5 | 67586673  | 67586712  | PIK3R1_6467 | + | GTGACCTATGCACCAGACGTAGTATTATTGTAGAGAGTAGTAAATTTCTGGCTTTTTAAGATCGGAAGAGCGGTTTCAG     |
| chr5 | 67588200  | 67588239  | PIK3R1_6468 | + | GTGACCTATGCACCAGACGTAGAACAATTCATTTTCAGAGATTTTAGATTTAAAGAAAGAAAGATCGGAAGAGCGGTTTCAG  |
| chr5 | 67589038  | 67589077  | PIK3R1_6469 | + | GTGACCTATGCACCAGACGTGAATATAGCTGAAATAGGGTTTTGGGCTGATATTAACAAGATCGGAAGAGCGGTTTCAG     |
| chr5 | 67589322  | 67589361  | PIK3R1_6470 | + | GTGACCTATGCACCAGACGTCGAATGAATTACAGTTACGATGTTTAGACAAGATCCTAGATCGGAAGAGCGGTTTCAG      |
| chr5 | 67589673  | 67589712  | PIK3R1_6471 | + | GTGACCTATGCACCAGACGTTATGAAAATCAGATTAAAAAATAAGAGTTCTAAACTTTTAAAGATCGGAAGAGCGGTTTCAG  |
| chr5 | 67590517  | 67590556  | PIK3R1_6472 | + | GTGACCTATGCACCAGACGTCCTCTGTTCTGTGTAGAGTAACCAAAATCCTCTAAAAGATCGGAAGAGCGGTTTCAG       |
| chr5 | 67591163  | 67591202  | PIK3R1_6473 | + | GTGACCTATGCACCAGACGTGAAATGAAATCCTATACATGAATAATGGTATTGCTACAAGATCGGAAGAGCGGTTTCAG     |
| chr5 | 67591327  | 67591366  | PIK3R1_6474 | + | GTGACCTATGCACCAGACGTACTAAAGATGGTATAGCAGAAGATTTTTCTCATTTTAGGAGATCGGAAGAGCGGTTTCAG    |
| chr5 | 67592180  | 67592219  | PIK3R1_6475 | + | GTGACCTATGCACCAGACGTCCAGCAAATTTTTTACAACATCTCATGAAGAGATGTTAGATCGGAAGAGCGGTTTCAG      |
| chr5 | 67593440  | 67593479  | PIK3R1_6476 | + | GTGACCTATGCACCAGACGCTTTTGATCCTTCTCCTGAAGTTCAGCCACCCTGAGGCCTCAGATCGGAAGAGCGGTTTCAG   |
| chr2 | 128015314 | 128015353 | ERCC3_6477  | + | GTGACCTATGCACCAGACGTGGGGGAAACCAGCCCATGTTAGTCTCCAGAAGAAAAGATACAGATCGGAAGAGCGGTTTCAG  |
| chr2 | 128017035 | 128017074 | ERCC3_6478  | + | GTGACCTATGCACCAGACGTCAGCCAGCAGACATGCCCTTTCTGCTCTCTCCCCAGATCGGAAGAGCGGTTTCAG         |
| chr2 | 128018933 | 128018972 | ERCC3_6479  | + | GTGACCTATGCACCAGACGTAAGTGAAGAGGTTTTATATATAGGAAAAAAGATCAGATCGGAAGAGCGGTTTCAG         |
| chr2 | 128029040 | 128029079 | ERCC3_6480  | + | GTGACCTATGCACCAGACGTAAGTGAAGAGGTTTTATATATAGGAAAAAAGATCAGATCGGAAGAGCGGTTTCAG         |
| chr2 | 128030548 | 128030587 | ERCC3_6481  | + | GTGACCTATGCACCAGACGTATGAAGCTGTGTTAGACCACAGAATAATGCCTCAGTTATCAGATCGGAAGAGCGGTTTCAG   |
| chr2 | 128036962 | 128037001 | ERCC3_6482  | + | GTGACCTATGCACCAGACGTGAAGAACCAGGGGTCATTTTACAAGTTTAAACACCACAGATCGGAAGAGCGGTTTCAG      |
| chr2 | 128044604 | 128044643 | ERCC3_6483  | + | GTGACCTATGCACCAGACGTCAGAGTGAATGCCAATCCCAACAGGAGGTTGAAATGAAGGAGATCGGAAGAGCGGTTTCAG   |
| chr2 | 128046451 | 128046490 | ERCC3_6484  | + | GTGACCTATGCACCAGACGTGGCACAAGGGGTTTTAAATCTGTTACTGTCTCAAAAGATCGGAAGAGCGGTTTCAG        |
| chr2 | 128047088 | 128047127 | ERCC3_6485  | + | GTGACCTATGCACCAGACGTGGTAGGTGCTGAACGTGCACACAACATTTAATCTGCTGTAGATCGGAAGAGCGGTTTCAG    |
| chr2 | 128047411 | 128047450 | ERCC3_6486  | + | GTGACCTATGCACCAGACGTGGGAGGAAGAAGGGGCTACTGACCAGCAGGTACCTCTGAGATCGGAAGAGCGGTTTCAG     |
| chr2 | 128047860 | 128047899 | ERCC3_6487  | + | GTGACCTATGCACCAGACGTAGATAACATCCAACAGGTAAATGTGCAGCTAACTCAGAACAGATCGGAAGAGCGGTTTCAG   |
| chr2 | 128050433 | 128050472 | ERCC3_6488  | + | GTGACCTATGCACCAGACGTCCAATGGACAAAACAGACAAGGAAACATGAGTTGCAGAGAGATCGGAAGAGCGGTTTCAG    |
| chr2 | 128051305 | 128051344 | ERCC3_6489  | + | GTGACCTATGCACCAGACGTCACAACAGAAGTAAGCCAGCAGGACCTTCAGGGTTCCAGATCGGAAGAGCGGTTTCAG      |
| chr2 | 128051668 | 128051707 | ERCC3_6490  | + | GTGACCTATGCACCAGACGTGCAGACAGAAGATGACCCCGCTCCACAGCCCGCCAGATCGGAAGAGCGGTTTCAG         |
| chr9 | 5022224   | 5022263   | JAK2_6491   | + | GTGACCTATGCACCAGACGTAAAAACAGCATTTTCTTTTTATGCATGGATTGTTTTAATAGATCGGAAGAGCGGTTTCAG    |
| chr9 | 5029917   | 5029956   | JAK2_6492   | + | GTGACCTATGCACCAGACGTCAGTAAAGTAACTCACTTAATGCTAAAAGGCAAAATGGGAAGATCGGAAGAGCGGTTTCAG   |
| chr9 | 5044531   | 5044570   | JAK2_6493   | + | GTGACCTATGCACCAGACGTATTATCTTACTTGATCATGATTAATGATAAATATCTTGAGATCGGAAGAGCGGTTTCAG     |
| chr9 | 5050842   | 5050881   | JAK2_6494   | + | GTGACCTATGCACCAGACGTTTTGCAATCCTTACACATAAGTGTGAGTAGAGATTTATAGATCGGAAGAGCGGTTTCAG     |
| chr9 | 5054895   | 5054934   | JAK2_6495   | + | GTGACCTATGCACCAGACGTATGATGTTCTGTTCTTTGTTATTTAAGTACAATGGAAGATCGGAAGAGCGGTTTCAG       |
| chr9 | 5055799   | 5055838   | JAK2_6496   | + | GTGACCTATGCACCAGACGTTTTATGATTGAATAAGTTCATTTTATAGTCTCAGAAAAGATCGGAAGAGCGGTTTCAG      |



|       |           |           |           |   |                                                                                       |
|-------|-----------|-----------|-----------|---|---------------------------------------------------------------------------------------|
| chr9  | 5065051   | 5065090   | JAK2_6497 | + | GTGACCTATGCACCAGACGTCAGACTTAAAAGTAAATTTTTAGAAAAGTAAATGCTGTATAGATCGGAAGAGCGGTTTCAG     |
| chr9  | 5066800   | 5066839   | JAK2_6498 | + | GTGACCTATGCACCAGACGTCACACTTATTAGTGGTAACACTTTTATTAGTTTCATTTAATAGATCGGAAGAGCGGTTTCAG    |
| chr9  | 5069219   | 5069258   | JAK2_6499 | + | GTGACCTATGCACCAGACGTTTTCTAGTTATTTTTAAATTACTGGTCATGGATTGTTTTATAGATCGGAAGAGCGGTTTCAG    |
| chr9  | 5070063   | 5070102   | JAK2_6500 | + | GTGACCTATGCACCAGACGTAGATACTCATTACTGTCTTTTTGTCCTTTTAAAACAACAAGATCGGAAGAGCGGTTTCAG      |
| chr9  | 5072637   | 5072676   | JAK2_6501 | + | GTGACCTATGCACCAGACGTTCTTTATATTGTTTCATGTAGTTTATGCTGTTTAAAGATGTAGATCGGAAGAGCGGTTTCAG    |
| chr9  | 5073796   | 5073835   | JAK2_6502 | + | GTGACCTATGCACCAGACGTCACAGGCTTTCTAATGCCTTTCTCAGAGCATCTGTTTTTAGATCGGAAGAGCGGTTTCAG      |
| chr9  | 5077630   | 5077591   | JAK2_6503 | + | GTGACCTATGCACCAGACGTCACACTTTTTATCAAAGTACTATTTTTATTTTTATAAAAACAGATCGGAAGAGCGGTTTCAG    |
| chr9  | 5078455   | 5078494   | JAK2_6504 | + | GTGACCTATGCACCAGACGTGAAGGATTATATAATGTTACTAAGCTTTACTTGGGCAGAGATCGGAAGAGCGGTTTCAG       |
| chr9  | 5080391   | 5080430   | JAK2_6505 | + | GTGACCTATGCACCAGACGTATAGACTAAGTTAGAATTACTCTATCTCGAACTTTTCATAAGATCGGAAGAGCGGTTTCAG     |
| chr9  | 5080694   | 5080733   | JAK2_6506 | + | GTGACCTATGCACCAGACGTGAATGATCTTATTGATTTTTCCAGCTTTCTATCTTTATTGTAGATCGGAAGAGCGGTTTCAG    |
| chr9  | 5081872   | 5081911   | JAK2_6507 | + | GTGACCTATGCACCAGACGTAGAAATTTTTCAAATAGAGTATAATCATTTCATTTAGGAAAGATCGGAAGAGCGGTTTCAG     |
| chr9  | 5089874   | 5089913   | JAK2_6508 | + | GTGACCTATGCACCAGACGTCATTGAAACCTATTTAAATTCAGGTAATGTGTTTGGCATAAGATCGGAAGAGCGGTTTCAG     |
| chr9  | 5090581   | 5090620   | JAK2_6509 | + | GTGACCTATGCACCAGACGTTCCGTGATTATTTGCTGTAGATGAAGCAACCGTGTTGAAGTAGATCGGAAGAGCGGTTTCAG    |
| chr9  | 5090922   | 5090961   | JAK2_6510 | + | GTGACCTATGCACCAGACGTTTTCCAGTATGATAAATGAAATTTTAGAGCACAGACTTCAAAGATCGGAAGAGCGGTTTCAG    |
| chr9  | 5126457   | 5126496   | JAK2_6511 | + | GTGACCTATGCACCAGACGTTTTTTTTAATCCAGGGTAGTCATGCATTTCTTTTACTTTTAGATCGGAAGAGCGGTTTCAG     |
| chr9  | 5126802   | 5126841   | JAK2_6512 | + | GTGACCTATGCACCAGACGTTCTTCACTCTGAGACCAAGTAGATTTACAGAAACAAAGTTTAGATCGGAAGAGCGGTTTCAG    |
| chr4  | 55524259  | 55524298  | KIT_6513  | + | GTGACCTATGCACCAGACGTGGCGCTGGCACCCCGCCGCTGCCACTACTCGGCGAAGCTAGATCGGAAGAGCGGTTTCAG      |
| chr4  | 55561958  | 55561997  | KIT_6514  | + | GTGACCTATGCACCAGACGTTCCGTCTTCTGCAGTGTGTGTTTTCAAGAATTTAATATCTAGATCGGAAGAGCGGTTTCAG     |
| chr4  | 55564742  | 55564781  | KIT_6515  | + | GTGACCTATGCACCAGACGTTTTCTTACTGCTCTGGGAGTTGAGAACTCACTTATCTAAGATCGGAAGAGCGGTTTCAG       |
| chr4  | 55565943  | 55565982  | KIT_6516  | + | GTGACCTATGCACCAGACGTGCGTTCATTCTTCTCATGTTCTGTCTGTGGGAGATGATAGATCGGAAGAGCGGTTTCAG       |
| chr4  | 55570069  | 55570108  | KIT_6517  | + | GTGACCTATGCACCAGACGTCATGGGAATGTTAAATTACTGGCAGTAGTGAAGAAGAAGATCGGAAGAGCGGTTTCAG        |
| chr4  | 55573464  | 55573503  | KIT_6518  | + | GTGACCTATGCACCAGACGTGACCTTGCCCTGGGGGATTACACATTACCCCTTTTCCAGAGATCGGAAGAGCGGTTTCAG      |
| chr4  | 55575716  | 55575755  | KIT_6519  | + | GTGACCTATGCACCAGACGTTGAAGGGCTCTTTAATTTTTATTCTTTTAAAGTTGTAGATCGGAAGAGCGGTTTCAG         |
| chr4  | 55589875  | 55589914  | KIT_6520  | + | GTGACCTATGCACCAGACGTTATTTTTGGCAGCTGTTAATATGCAGAGGGGAAGGACTGCAGATCGGAAGAGCGGTTTCAG     |
| chr4  | 55592215  | 55592254  | KIT_6521  | + | GTGACCTATGCACCAGACGTAGGTATATTTCTTTTTAATCCAATTAAGGGGATGTTTAGAGATCGGAAGAGCGGTTTCAG      |
| chr4  | 55592227  | 55592266  | KIT_6522  | + | GTGACCTATGCACCAGACGTTTTTAATCCAATTAAGGGGATGTTTAGGCTGTCTACCAGATCGGAAGAGCGGTTTCAG        |
| chr4  | 55593501  | 55593540  | KIT_6523  | + | GTGACCTATGCACCAGACGTTTTTGTCTCTCCAGAGTCTCTAATGACTGAGACAATAGATCGGAAGAGCGGTTTCAG         |
| chr4  | 55593719  | 55593758  | KIT_6524  | + | GTGACCTATGCACCAGACGTAACAGGGGCTTCCATGTCACCTTTTTGGGTACACATAACAGATCGGAAGAGCGGTTTCAG      |
| chr4  | 55594104  | 55594143  | KIT_6525  | + | GTGACCTATGCACCAGACGTGTATGGTACTGCTCATCGCTTGACATAGTTTGGCAGTTGCGAGTTGATCGGAAGAGCGGTTTCAG |
| chr4  | 55594298  | 55594337  | KIT_6526  | + | GTGACCTATGCACCAGACGTGTCCAAGCTGCCTTTTTATTGTCTGTACAGTTATCAAACAAGATCGGAAGAGCGGTTTCAG     |
| chr4  | 55595662  | 55595701  | KIT_6527  | + | GTGACCTATGCACCAGACGTTTTACATAAATAGTTAGCTGTTGACAGGCAGTTTCATGGGGAGATCGGAAGAGCGGTTTCAG    |
| chr4  | 55597596  | 55597635  | KIT_6528  | + | GTGACCTATGCACCAGACGTACCTATCAAGCAACCAAGAGTAACTTTACAGAGAGATGTAGATCGGAAGAGCGGTTTCAG      |
| chr4  | 55599369  | 55599408  | KIT_6529  | + | GTGACCTATGCACCAGACGTATTCTCTGCTTGACAGCTCTGCAAAGGATTTTTAGTTTTCAAGATCGGAAGAGCGGTTTCAG    |
| chr4  | 55602786  | 55602825  | KIT_6530  | + | GTGACCTATGCACCAGACGTTAACTGCCCAGCAACTTCATTAGCTCAGAGCATCTTCTAGATCGGAAGAGCGGTTTCAG       |
| chr4  | 55602997  | 55603036  | KIT_6531  | + | GTGACCTATGCACCAGACGTAAAATTTTTCTTTAGTGTCCAGCTTTTTCCCTTTTTATTTTTAGATCGGAAGAGCGGTTTCAG   |
| chr4  | 55603457  | 55603496  | KIT_6532  | + | GTGACCTATGCACCAGACGTCTGGCCAGGCATAGAATCCCCCTTCTCCAGTTCAGGTAGATCGGAAGAGCGGTTTCAG        |
| chr4  | 55604734  | 55604773  | KIT_6533  | + | GTGACCTATGCACCAGACGTTGTTGGTCCACCCTCCAGGAATGATCTTCTTTTGGCAGATCGGAAGAGCGGTTTCAG         |
| chr10 | 43572790  | 43572829  | RET_6534  | + | GTGACCTATGCACCAGACGTCCGGCCGCGCGGCTCCCGCAGGGGCCAGGGCGAAGTTGGCGAGATCGGAAGAGCGGTTTCAG    |
| chr10 | 43596181  | 43596220  | RET_6535  | + | GTGACCTATGCACCAGACGTGCCCCAACACCCACCCCGTGGCCCCACCCACCCCTTCTAGATCGGAAGAGCGGTTTCAG       |
| chr10 | 43598088  | 43598127  | RET_6536  | + | GTGACCTATGCACCAGACGTACCTGTGGGGCCGCCACAGTGCCTGCTACTGCTGTGCAGATCGGAAGAGCGGTTTCAG        |
| chr10 | 43600652  | 43600691  | RET_6537  | + | GTGACCTATGCACCAGACGTGCGCGTGTGGTGGCTACCCAGTGTCTGTCTCCGGCCACAAGATCGGAAGAGCGGTTTCAG      |
| chr10 | 43602030  | 43602069  | RET_6538  | + | GTGACCTATGCACCAGACGTCTGGTGGCACGGCCTGGCTAGGCCCCAGGAAATGAGGTGAGATCGGAAGAGCGGTTTCAG      |
| chr10 | 43604689  | 43604728  | RET_6539  | + | GTGACCTATGCACCAGACGTACCTATTGCCTGTCTGGGGAAGATTGAAGGGCAAGGGACAGATCGGAAGAGCGGTTTCAG      |
| chr10 | 43606924  | 43606963  | RET_6540  | + | GTGACCTATGCACCAGACGTGCTCCAGGGAGGGAGGGTTCGGGGCTTCTGGGGGCTTCTGGAAGATCGGAAGAGCGGTTTCAG   |
| chr10 | 43607683  | 43607722  | RET_6541  | + | GTGACCTATGCACCAGACGTGAAACGCCAAAGGGAGGCCTCAGGGGCGATGGCACCGGTAGATCGGAAGAGCGGTTTCAG      |
| chr10 | 43608422  | 43608461  | RET_6542  | + | GTGACCTATGCACCAGACGTTTTAATCAGGGCATGGGAACAGGTAGGAGATAGTAGGGGAAGATCGGAAGAGCGGTTTCAG     |
| chr10 | 43609134  | 43609173  | RET_6543  | + | GTGACCTATGCACCAGACGTGGCGGGCCGGGACCACCACCTCCCAGCCCCACAGAGGTAGATCGGAAGAGCGGTTTCAG       |
| chr10 | 43610195  | 43610234  | RET_6544  | + | GTGACCTATGCACCAGACGTCTGCGGGGCAGGGAAGATCCCCTGCCCTCCCAGCTGCCATAGATCGGAAGAGCGGTTTCAG     |
| chr10 | 43612190  | 43612229  | RET_6545  | + | GTGACCTATGCACCAGACGTGGCACAGGCACAGTGCCTCCGTTGGGGAGTCTCCGGGGCGGGAGATCGGAAGAGCGGTTTCAG   |
| chr10 | 43613939  | 43613978  | RET_6546  | + | GTGACCTATGCACCAGACGTCTGCAGGGTAGGTTGGGCAGCCACTGCACCCAGGCTGGGGAGATCGGAAGAGCGGTTTCAG     |
| chr10 | 43615662  | 43615701  | RET_6547  | + | GTGACCTATGCACCAGACGTCCGGGGATGAGCGGGGCTCCAGGATCCCAGGTGCACCCAGATCGGAAGAGCGGTTTCAG       |
| chr10 | 43617475  | 43617514  | RET_6548  | + | GTGACCTATGCACCAGACGTGTGTTGCTCTTTGGGGTGAGGTTACAGAACAACCCCTTAAGATCGGAAGAGCGGTTTCAG      |
| chr10 | 43619267  | 43619306  | RET_6549  | + | GTGACCTATGCACCAGACGTACTGGCTTTGGCCAGCCTCACTTGGGAAGGGAGGGGACAAGATCGGAAGAGCGGTTTCAG      |
| chr10 | 43620441  | 43620480  | RET_6550  | + | GTGACCTATGCACCAGACGTGGGTCCAATCCCACAAGCTGAAAGTGGCTTGGGGAGACTAGATCGGAAGAGCGGTTTCAG      |
| chr10 | 43622181  | 43622220  | RET_6551  | + | GTGACCTATGCACCAGACGTCCATGCATTTACTAGATTCTAGCACCGCTGTCCCTTTGCAGATCGGAAGAGCGGTTTCAG      |
| chr10 | 43623728  | 43623767  | RET_6552  | + | GTGACCTATGCACCAGACGTTGAAAGGTAATGGACTCACAAGGGGAAGAAACATGCTGAGAGATCGGAAGAGCGGTTTCAG     |
| chr14 | 105236768 | 105236807 | AKT1_6553 | + | GTGACCTATGCACCAGACGTAGACAGCTCAGACCCGCTGCCCTCCCTCCCTCAGATCGGAAGAGCGGTTTCAG             |
| chr14 | 105237195 | 105237234 | AKT1_6554 | + | GTGACCTATGCACCAGACGTGGGCAGCGGACGATGATGCTTCCCTCCCTCCCAAGATCGGAAGAGCGGTTTCAG            |

|       |           |           |              |   |                                                                                     |
|-------|-----------|-----------|--------------|---|-------------------------------------------------------------------------------------|
| chr14 | 105238800 | 105238839 | AKT1_6555    | + | GTGACCTATGCACCAGACGTGAAACAAGGCCACAGTGTCCGGTACC GCCACCTGCCAGGCAGATCGGAAGAGCGGTTTCAG  |
| chr14 | 105239440 | 105239479 | AKT1_6556    | + | GTGACCTATGCACCAGACGTGGCAGATGGGCAGGACTCGGCATCAAGGGGTGTCCGGGACAGATCGGAAGAGCGGTTTCAG   |
| chr14 | 105239727 | 105239766 | AKT1_6557    | + | GTGACCTATGCACCAGACGTGGTGGCCTCAGGTGAGTGCAGGCGCCAGGCCCCAGGGCCCTGAGATCGGAAGAGCGGTTTCAG |
| chr14 | 105239928 | 105239967 | AKT1_6558    | + | GTGACCTATGCACCAGACGTGCGAACCTGAGGCACAGCCGTGGCTCGGGCCTCTGCCCCAGATCGGAAGAGCGGTTTCAG    |
| chr14 | 105240328 | 105240367 | AKT1_6559    | + | GTGACCTATGCACCAGACGTGGGGAGCTGGAAGTGCAGCCACAGGCAGGACGGCAGCCAGATCGGAAGAGCGGTTTCAG     |
| chr14 | 105241351 | 105241390 | AKT1_6560    | + | GTGACCTATGCACCAGACGTGGGCTGGTGGAGTGCACCCGCCACCTCATCTCCACCCAGATCGGAAGAGCGGTTTCAG      |
| chr14 | 105241555 | 105241594 | AKT1_6561    | + | GTGACCTATGCACCAGACGTGACCAGGGTCAGCAAGCGGCGCTGCCAACAGTGCACAGATCGGAAGAGCGGTTTCAG       |
| chr14 | 105242147 | 105242186 | AKT1_6562    | + | GTGACCTATGCACCAGACGTTCAGGTGAGGCTGCAGGCCTGTACCAGATCAGGAGCTCCAAGATCGGAAGAGCGGTTTCAG   |
| chr14 | 105243118 | 105243157 | AKT1_6563    | + | GTGACCTATGCACCAGACGTGCAGAGCCTCTGTCTGCGTGCATCCCCCTGCCCTCCAGAGATCGGAAGAGCGGTTTCAG     |
| chr14 | 105246564 | 105246603 | AKT1_6564    | + | GTGACCTATGCACCAGACGTGCGGGTGGTGAGAGCCACGCACACTCTACCCGTGAGACCCAGATCGGAAGAGCGGTTTCAG   |
| chr14 | 105258991 | 105259030 | AKT1_6565    | + | GTGACCTATGCACCAGACGTGCTCCCGCAGCGCTCACGCGCTCCTCTCAGGCTGGCGCTCAGATCGGAAGAGCGGTTTCAG   |
| chr20 | 39766509  | 39766548  | PLCG1_6566   | + | GTGACCTATGCACCAGACGTCCACTTCTGCCTGGGCCCGCCCGGGGCTCGTGGGAGATCGGAAGAGCGGTTTCAG         |
| chr20 | 39788409  | 39788448  | PLCG1_6567   | + | GTGACCTATGCACCAGACGTAGGGGTAGAGGAGTAGAGGATAGTTAGGGGAATGCCTGAGATCGGAAGAGCGGTTTCAG     |
| chr20 | 39788614  | 39788653  | PLCG1_6568   | + | GTGACCTATGCACCAGACGTCTCCTGAAGGGGTTAGGGCTGGGAGCATTAGGGACCAGGGAGATCGGAAGAGCGGTTTCAG   |
| chr20 | 39788804  | 39788843  | PLCG1_6569   | + | GTGACCTATGCACCAGACGTAGCTGTGGCTGTAGCCAGCAGGGTGGGGATGGGCATCCAAGATCGGAAGAGCGGTTTCAG    |
| chr20 | 39791187  | 39791226  | PLCG1_6570   | + | GTGACCTATGCACCAGACGTCCCAGGGCTGTCTGTAGATGGGGGCAGGGGAAGCCAAGAGAGATCGGAAGAGCGGTTTCAG   |
| chr20 | 39791376  | 39791415  | PLCG1_6571   | + | GTGACCTATGCACCAGACGTACCTGCCCTCCCTCAACCCCTGCCCTGCTCTTCCACCCAGATCGGAAGAGCGGTTTCAG     |
| chr20 | 39791643  | 39791682  | PLCG1_6572   | + | GTGACCTATGCACCAGACGTGAGTGGGGAGGTGGGGTTTCCCTGGGCCCCCTTCATCTCAGATCGGAAGAGCGGTTTCAG    |
| chr20 | 39791926  | 39791965  | PLCG1_6573   | + | GTGACCTATGCACCAGACGTGCTGACATTGGCCAGGCTGGTAGGTTGTGGGGGGCTGGGAGATCGGAAGAGCGGTTTCAG    |
| chr20 | 39792130  | 39792169  | PLCG1_6574   | + | GTGACCTATGCACCAGACGTGTTTACCATTTTTTGTCAAGAGAATGAGTAGGGGTGAAGATCGGAAGAGCGGTTTCAG      |
| chr20 | 39792484  | 39792523  | PLCG1_6575   | + | GTGACCTATGCACCAGACGTCTCCTTACAGGCCACCCAGCTTCTCCCCAGGAGGGCCCAAGATCGGAAGAGCGGTTTCAG    |
| chr20 | 39792657  | 39792696  | PLCG1_6576   | + | GTGACCTATGCACCAGACGTTCAGGGCTGGGGGAGGGGAAGTGGGAGGCCCTGCCCGCTTAGATCGGAAGAGCGGTTTCAG   |
| chr20 | 39792852  | 39792891  | PLCG1_6577   | + | GTGACCTATGCACCAGACGTGGCTGAGTACCAGGGGTTAACTTGGCTCCAGTCTCAGATCGGAAGAGCGGTTTCAG        |
| chr20 | 39793752  | 39793791  | PLCG1_6578   | + | GTGACCTATGCACCAGACGTGGGCTATTGCGGAAGGCCACACTTCTCAGTGCCTGCCAGATCGGAAGAGCGGTTTCAG      |
| chr20 | 39794018  | 39794057  | PLCG1_6579   | + | GTGACCTATGCACCAGACGTGGCCAGGCTGGGGGTGGTAGGCCAGTGGGTGTGAGGACCAGATCGGAAGAGCGGTTTCAG    |
| chr20 | 39794202  | 39794241  | PLCG1_6580   | + | GTGACCTATGCACCAGACGTAGCTCAGGTCTGGGGGCTGGGCCAGTCCAGGCCTGGGCCAAGATCGGAAGAGCGGTTTCAG   |
| chr20 | 39794477  | 39794516  | PLCG1_6581   | + | GTGACCTATGCACCAGACGTCCATGCAGATGCGTATGTTCACTCAGCGTGTGTACACAGAAGATCGGAAGAGCGGTTTCAG   |
| chr20 | 39795045  | 39795084  | PLCG1_6582   | + | GTGACCTATGCACCAGACGTGGCGGCGGCAAGGCAGGGCCAGGGCCATGGTGGTAGATCGGAAGAGCGGTTTCAG         |
| chr20 | 39795246  | 39795285  | PLCG1_6583   | + | GTGACCTATGCACCAGACGTGGCTGGGCTGGGCTGGGGCTGGGCTGGGCTGAGCTGCCAGATCGGAAGAGCGGTTTCAG     |
| chr20 | 39795510  | 39795549  | PLCG1_6584   | + | GTGACCTATGCACCAGACGTGGTGTAGAGCGGGCTAGGCAGGGGAGGAGAGAGACCCAGATCGGAAGAGCGGTTTCAG      |
| chr20 | 39796580  | 39796619  | PLCG1_6585   | + | GTGACCTATGCACCAGACGTGGCCTCTGGGCATAGGAAGCTGGGGAGGGTCCCAGCTGCAGATCGGAAGAGCGGTTTCAG    |
| chr20 | 39797521  | 39797560  | PLCG1_6586   | + | GTGACCTATGCACCAGACGTGGTGTGGTAGGCCAGAGTCCAAGGGCCCAAGTGGAGCTGAGATCGGAAGAGCGGTTTCAG    |
| chr20 | 39797826  | 39797865  | PLCG1_6587   | + | GTGACCTATGCACCAGACGTAACCACCTGAGTAACAGCATTCCCTATCCAGATTCTCCAGATCGGAAGAGCGGTTTCAG     |
| chr20 | 39798177  | 39798216  | PLCG1_6588   | + | GTGACCTATGCACCAGACGTATCTGTTTCTTCCCACTGTTCCCTAGGGTGAAGTCTAGATCGGAAGAGCGGTTTCAG       |
| chr20 | 39798920  | 39798959  | PLCG1_6589   | + | GTGACCTATGCACCAGACGTGCTGGCAACCTCTGGGGGAGGCTGTGTGGGCCAGATCGGAAGAGCGGTTTCAG           |
| chr20 | 39800940  | 39800979  | PLCG1_6590   | + | GTGACCTATGCACCAGACGTGGGCCAGGCGGGGTGTGCATGTGCCTGGAGGGCCTGGTGGATCGGAAGAGCGGTTTCAG     |
| chr20 | 39801296  | 39801335  | PLCG1_6591   | + | GTGACCTATGCACCAGACGTCCCCTGTGAGGAGGGTGGAGGGGGCACTGTGGGCAGCTAGATCGGAAGAGCGGTTTCAG     |
| chr20 | 39801528  | 39801567  | PLCG1_6592   | + | GTGACCTATGCACCAGACGTCTCATCTGGGCTTCAAGGTAGGAAAGGGGCTGCTTGCCGTAGATCGGAAGAGCGGTTTCAG   |
| chr20 | 39802185  | 39802224  | PLCG1_6593   | + | GTGACCTATGCACCAGACGTCTCCAGTTCATCTCCTCATCTGCTGGGGCACTGCAAGAGATCGGAAGAGCGGTTTCAG      |
| chr20 | 39802464  | 39802503  | PLCG1_6594   | + | GTGACCTATGCACCAGACGTTCCTGGAGGCAGTCCCTGCAATCTTGGCTGGCAGGGTGGATCGGAAGAGCGGTTTCAG      |
| chr20 | 39802662  | 39802701  | PLCG1_6595   | + | GTGACCTATGCACCAGACGTCCAGGTGGGCTGGCCTGGGCTAGGTGGGAGGAGGCCAGATCGGAAGAGCGGTTTCAG       |
| chr20 | 39802962  | 39803001  | PLCG1_6596   | + | GTGACCTATGCACCAGACGTTGGAGGGGTGTAGAGCCAGGAAGGCAGTGGCTAGGTCTAGATCGGAAGAGCGGTTTCAG     |
| chr20 | 39803160  | 39803199  | PLCG1_6597   | + | GTGACCTATGCACCAGACGTGCCTCGTTGGAGAGCAGCAGGTGCTGTGCGCCTTGTAGAAAGATCGGAAGAGCGGTTTCAG   |
| chr19 | 11095060  | 11095099  | SMARCA4_6598 | + | GTGACCTATGCACCAGACGTCTGTGCCCGCCTCGCACCTCGCGGCTCTGCCCACTAGGGCAGATCGGAAGAGCGGTTTCAG   |
| chr19 | 11096092  | 11096131  | SMARCA4_6599 | + | GTGACCTATGCACCAGACGTGCTTCTCTCTGCTTGTGTTTGTCTACTACAGTCCAGATCCAGATCGGAAGAGCGGTTTCAG   |
| chr19 | 11097280  | 11097319  | SMARCA4_6600 | + | GTGACCTATGCACCAGACGTCTGCCCTGCGCCCTCAGGTGTCTCAGAGCGAATGGCTGGGAGATCGGAAGAGCGGTTTCAG   |
| chr19 | 11097690  | 11097729  | SMARCA4_6601 | + | GTGACCTATGCACCAGACGTTCTTCTATGGTGGTGCACCCGTGCCCTTACTCCCCATCTCAGATCGGAAGAGCGGTTTCAG   |
| chr19 | 11098611  | 11098650  | SMARCA4_6602 | + | GTGACCTATGCACCAGACGTGGCCAGTTGCCAAGGTCACTGCCCTGTGTCCCCATGTAGATCGGAAGAGCGGTTTCAG      |
| chr19 | 11100130  | 11100169  | SMARCA4_6603 | + | GTGACCTATGCACCAGACGTGCATGGCCGACGCTTCCGAAAAGGGGCTTTGTACCAACAGATCGGAAGAGCGGTTTCAG     |
| chr19 | 11102010  | 11102049  | SMARCA4_6604 | + | GTGACCTATGCACCAGACGTGTGGCCCAAGGCCCTGCAGCCCCCACTGGCTGCCTGAGATCGGAAGAGCGGTTTCAG       |
| chr19 | 11105688  | 11105727  | SMARCA4_6605 | + | GTGACCTATGCACCAGACGTGCCTTTGACGTGCGCTCTTACATGTGATGCTGTACAGATCGGAAGAGCGGTTTCAG        |
| chr19 | 11107067  | 11107106  | SMARCA4_6606 | + | GTGACCTATGCACCAGACGCTCTGGCATGTGCCCGCCGCGGGTGGATGGGAGCAGCCAGATCGGAAGAGCGGTTTCAG      |
| chr19 | 11107231  | 11107270  | SMARCA4_6607 | + | GTGACCTATGCACCAGACGTAGGGTTTCTTGTGGAAGTCAAGCTAGCCCTAAGGCGTTAGATCGGAAGAGCGGTTTCAG     |
| chr19 | 11113846  | 11113885  | SMARCA4_6608 | + | GTGACCTATGCACCAGACGTCTTGCATTCCAGATGCAGTGGGGATCCAAGTCTCGGTGAGATCGGAAGAGCGGTTTCAG     |
| chr19 | 11114084  | 11114123  | SMARCA4_6609 | + | GTGACCTATGCACCAGACGTATTTCCCTGGCTTCAAGGCTCTCAGTGCCTAGTGGCAGTGGATCGGAAGAGCGGTTTCAG    |
| chr19 | 11118710  | 11118749  | SMARCA4_6610 | + | GTGACCTATGCACCAGACGTCCGACACAGGTTGTCTGTGCCAGTCTCCTGTGAGGTGGCAGATCGGAAGAGCGGTTTCAG    |
| chr19 | 11121218  | 11121257  | SMARCA4_6611 | + | GTGACCTATGCACCAGACGTGGGTGGGAGGTCACCGCCACTAGCTGCCTCGGTGGCAGATCGGAAGAGCGGTTTCAG       |
| chr19 | 11129710  | 11129749  | SMARCA4_6612 | + | GTGACCTATGCACCAGACGTGCCACTGAGGTTCTCTCTTGTCTACGGAGTGCAGGCGGAGATCGGAAGAGCGGTTTCAG     |

|       |          |          |              |   |                                                                                     |
|-------|----------|----------|--------------|---|-------------------------------------------------------------------------------------|
| chr19 | 11130388 | 11130427 | SMARCA4_6613 | + | GTGACCTATGCACCAGACGTCTGTGGGAAATGCCAGGCCATGGGCCGAGTGCTCACACGAGATCGGAAGAGCGGTTTCAG    |
| chr19 | 11132654 | 11132693 | SMARCA4_6614 | + | GTGACCTATGCACCAGACGTCCAGCTGTGCCATGCTGACGGTTCAGGTGCGGCTGGCTAGATCGGAAGAGCGGTTTCAG     |
| chr19 | 11134318 | 11134357 | SMARCA4_6615 | + | GTGACCTATGCACCAGACGTTTTGAGGGGAGCCACCAGTGAAGCAGCCTCACGTGGGGCAGATCGGAAGAGCGGTTTCAG    |
| chr19 | 11135125 | 11135164 | SMARCA4_6616 | + | GTGACCTATGCACCAGACGTGAGTCCCCAACTGCATCCCCACTGGGTGTCCAAGGCCGAGATCGGAAGAGCGGTTTCAG     |
| chr19 | 11136195 | 11136234 | SMARCA4_6617 | + | GTGACCTATGCACCAGACGTGCGGGCTGGGACGGCTCAGGCCCTGCTGTCTGCTGAGCTCAGATCGGAAGAGCGGTTTCAG   |
| chr19 | 11137033 | 11137072 | SMARCA4_6618 | + | GTGACCTATGCACCAGACGTTCCCACTGGATGGGGTGGCCAGGTGCTCCACCCAGGATAGATCGGAAGAGCGGTTTCAG     |
| chr19 | 11138637 | 11138676 | SMARCA4_6619 | + | GTGACCTATGCACCAGACGTGCCAGTGGAGGTTTCTTACAGGGTTTTGTGTTGTGGCTAGATCGGAAGAGCGGTTTCAG     |
| chr19 | 11141580 | 11141619 | SMARCA4_6620 | + | GTGACCTATGCACCAGACGTGCCGGGCCAGGTGCGAGGAGAAGGAGGGGTGCTGCAAGATCGGAAGAGCGGTTTCAG       |
| chr19 | 11144204 | 11144243 | SMARCA4_6621 | + | GTGACCTATGCACCAGACGTACCAGGCCGACCCCTCCACAGCTGAATGGTGGACGCGAGATCGGAAGAGCGGTTTCAG      |
| chr19 | 11144887 | 11144926 | SMARCA4_6622 | + | GTGACCTATGCACCAGACGTGAGGCTGGATGGGGCAGTTACAGGCATCCCACTCTGCTGCCAGATCGGAAGAGCGGTTTCAG  |
| chr19 | 11145819 | 11145858 | SMARCA4_6623 | + | GTGACCTATGCACCAGACGTGAGAGGCCACAGCTGCCCGAGGCCAGCCAGGCAGGGAGATCGGAAGAGCGGTTTCAG       |
| chr19 | 11152247 | 11152286 | SMARCA4_6624 | + | GTGACCTATGCACCAGACGTAGCGGGGAGGGCGGGGGCTGTAGGGTCCCCGTGGGACAGATCGGAAGAGCGGTTTCAG      |
| chr19 | 11169050 | 11169089 | SMARCA4_6625 | + | GTGACCTATGCACCAGACGTGTTGTACTGCGCCCGCATGTGCCCGGAGGGAGTCTGAGATCGGAAGAGCGGTTTCAG       |
| chr19 | 11169576 | 11169615 | SMARCA4_6626 | + | GTGACCTATGCACCAGACGTGCTGGGGTGGGGATGGGCCACTCCACAGCTGGGCTTAGATCGGAAGAGCGGTTTCAG       |
| chr19 | 11170572 | 11170611 | SMARCA4_6627 | + | GTGACCTATGCACCAGACGTGGGGGTTTCCAGACGCCGGGTTACGCTGGCCCGAGAGCAGATCGGAAGAGCGGTTTCAG     |
| chr19 | 11170874 | 11170913 | SMARCA4_6628 | + | GTGACCTATGCACCAGACGTGCCCGGAGCAGCCAGAGCTGGCATGTGCCAGGAGGCATCAGATCGGAAGAGCGGTTTCAG    |
| chr19 | 11172503 | 11172542 | SMARCA4_6629 | + | GTGACCTATGCACCAGACGTTCCAGCTCTCGACCCGAGCCCTCGTTCAGAGCTGAGATCGGAAGAGCGGTTTCAG         |
| chr16 | 68771377 | 68771416 | CDH1_6630    | + | GTGACCTATGCACCAGACGTCCCTACTTCCGAGGGCATTCCGGCCGCAAGCTCCAGATCGGAAGAGCGGTTTCAG         |
| chr16 | 68772325 | 68772364 | CDH1_6631    | + | GTGACCTATGCACCAGACGTGCTGCCGTTGCCCTGGGCGGAGTAGGGAGGGGTTGAAAAGATCGGAAGAGCGGTTTCAG     |
| chr16 | 68835807 | 68835846 | CDH1_6632    | + | GTGACCTATGCACCAGACGTATTTTTCTGAGAAGTTCGCTGTTGTTTTAGTGCCTGCTAGATCGGAAGAGCGGTTTCAG     |
| chr16 | 68842481 | 68842520 | CDH1_6633    | + | GTGACCTATGCACCAGACGTAAAGTCTCTGTTTTCTCTGGGAGGATTTGGCAGAGAAGTAAGATCGGAAGAGCGGTTTCAG   |
| chr16 | 68842762 | 68842801 | CDH1_6634    | + | GTGACCTATGCACCAGACGTCTTAGAAGCTTGTGGACACCGGGTAACATCCACCCAGGAAGATCGGAAGAGCGGTTTCAG    |
| chr16 | 68844255 | 68844294 | CDH1_6635    | + | GTGACCTATGCACCAGACGTAAATGAGAATCTGAATACTCAGAAGACTCTTAGTCTTAGATCGGAAGAGCGGTTTCAG      |
| chr16 | 68845773 | 68845812 | CDH1_6636    | + | GTGACCTATGCACCAGACGTGAGGAGTCCAGAGGGTGTGGAGGACAATGTGATTAGCAGATCGGAAGAGCGGTTTCAG      |
| chr16 | 68846177 | 68846216 | CDH1_6637    | + | GTGACCTATGCACCAGACGTAACTCCTTAGAGGGTTTCCAAAGAAAGTCTTTTGTGTTAGATCGGAAGAGCGGTTTCAG     |
| chr16 | 68847409 | 68847448 | CDH1_6638    | + | GTGACCTATGCACCAGACGTTACCTGGCAAGATGCAGAACTGGCATCCTCACAGCTGTTAGATCGGAAGAGCGGTTTCAG    |
| chr16 | 68849673 | 68849712 | CDH1_6639    | + | GTGACCTATGCACCAGACGTGGATTTTTCAACTGACTTGCAGCAACTGGTATTTTATATAGATCGGAAGAGCGGTTTCAG    |
| chr16 | 68853339 | 68853378 | CDH1_6640    | + | GTGACCTATGCACCAGACGTCTCATCTGAGCCTTTGCTGCTGACCTCCTAGCTAGTTCAGATCGGAAGAGCGGTTTCAG     |
| chr16 | 68856139 | 68856178 | CDH1_6641    | + | GTGACCTATGCACCAGACGTGAGTTTTATTTTGGCAACTTTGCTCCAATGCCATGCTTACAGATCGGAAGAGCGGTTTCAG   |
| chr16 | 68857540 | 68857579 | CDH1_6642    | + | GTGACCTATGCACCAGACGTGCGCAAGTGACTACGCTTTGACTTAAAAAAATGGCAGGAAGATCGGAAGAGCGGTTTCAG    |
| chr16 | 68862218 | 68862257 | CDH1_6643    | + | GTGACCTATGCACCAGACGTAAAACCTTGGTAGCTCAGTGGTGATCTCTTTATTTCGAAGAGATCGGAAGAGCGGTTTCAG   |
| chr16 | 68863711 | 68863750 | CDH1_6644    | + | GTGACCTATGCACCAGACGTACGTGGAAAGCCAAAGCATGGCTCATCTCTAAGCTCAGGAGATCGGAAGAGCGGTTTCAG    |
| chr16 | 68867413 | 68867452 | CDH1_6645    | + | GTGACCTATGCACCAGACGTAGAGGCGGGGCCACAGCCATGTGCTGGGAAATGCAGAAAAGATCGGAAGAGCGGTTTCAG    |
| chr6  | 36652334 | 36652373 | CDKN1A_6646  | + | GTGACCTATGCACCAGACGTGTGCACGGAAAGACTTTGTAAAGGACCAAGGATTCTCAGAAAAGATCGGAAGAGCGGTTTCAG |
| chr6  | 36653588 | 36653627 | CDKN1A_6647  | + | GTGACCTATGCACCAGACGTGGAAGGCTGACTCCTGGAAGGCGCAGGGCTCAAAGGCCAGATCGGAAGAGCGGTTTCAG     |
| chr19 | 10244388 | 10244427 | DNMT1_6648   | + | GTGACCTATGCACCAGACGTATAAAAGGAAAAGTCACTCTGGGGAACACGCCCGGTGTCAAGATCGGAAGAGCGGTTTCAG   |
| chr19 | 10244994 | 10245033 | DNMT1_6649   | + | GTGACCTATGCACCAGACGTGGAGAAGGGCAATGCCTGATGTGGACACCCAGGCCAAGGAGATCGGAAGAGCGGTTTCAG    |
| chr19 | 10246539 | 10246578 | DNMT1_6650   | + | GTGACCTATGCACCAGACGTGAGGCGCGGTGGGCGAGGGCAGTAGCACCCAGGCCGGTTCAGATCGGAAGAGCGGTTTCAG   |
| chr19 | 10246974 | 10247013 | DNMT1_6651   | + | GTGACCTATGCACCAGACGTGGACAGTGTGAGGCTGCAGTTGTGGGATGGGGTATAGGCAGATCGGAAGAGCGGTTTCAG    |
| chr19 | 10247967 | 10248006 | DNMT1_6652   | + | GTGACCTATGCACCAGACGTGTGGGGGCCCCAGCTGCACCTCATGTGAGCAGCATCGGAAGATCGGAAGAGCGGTTTCAG    |
| chr19 | 10248696 | 10248735 | DNMT1_6653   | + | GTGACCTATGCACCAGACGTGGAGGAGTCAACACCTCTGGAGATGCACGACGAGTGTAGATCGGAAGAGCGGTTTCAG      |
| chr19 | 10249292 | 10249331 | DNMT1_6654   | + | GTGACCTATGCACCAGACGTGAAGGACGGACAACCCACCCTCAGTGGGACACTCCCAACAGATCGGAAGAGCGGTTTCAG    |
| chr19 | 10250504 | 10250543 | DNMT1_6655   | + | GTGACCTATGCACCAGACGTGAGGAGACTGCAGGAGTCACTCCACAGACAGAGGGAAGATCGGAAGAGCGGTTTCAG       |
| chr19 | 10251596 | 10251635 | DNMT1_6656   | + | GTGACCTATGCACCAGACGTGAGGGCAGAGGCTAAACCCGATCTCAGAGTCCAAGTCCAAGATCGGAAGAGCGGTTTCAG    |
| chr19 | 10251876 | 10251915 | DNMT1_6657   | + | GTGACCTATGCACCAGACGTGAGAAGTCAATCGTGGGAGAGAAACGCAGTGTCCCCTAGATCGGAAGAGCGGTTTCAG      |
| chr19 | 10252907 | 10252946 | DNMT1_6658   | + | GTGACCTATGCACCAGACGTGAGGAGCTCGTGGAGCCTCTGTTAGGACTCTCTTTGTGTTAGATCGGAAGAGCGGTTTCAG   |
| chr19 | 10254674 | 10254713 | DNMT1_6659   | + | GTGACCTATGCACCAGACGTGCACCCACTTGACATCAATGAACCTTCCACCTTGCAGTGGAGATCGGAAGAGCGGTTTCAG   |
| chr19 | 10257211 | 10257250 | DNMT1_6660   | + | GTGACCTATGCACCAGACGTCAAAGGGACAGAAACATAAGGCCCTGAGGTGGCCGGCAGTAGATCGGAAGAGCGGTTTCAG   |
| chr19 | 10260344 | 10260383 | DNMT1_6661   | + | GTGACCTATGCACCAGACGTAAAGACGGGCATGGGGAGAAAGTTCTGACTTGCCAGCAGAAGATCGGAAGAGCGGTTTCAG   |
| chr19 | 10260655 | 10260694 | DNMT1_6662   | + | GTGACCTATGCACCAGACGTGAGCATAAGTTCATGGAGGATCATTCTGAGGGTCTTTGCTAGATCGGAAGAGCGGTTTCAG   |
| chr19 | 10262232 | 10262271 | DNMT1_6663   | + | GTGACCTATGCACCAGACGTACTGGTTTAACTAAGGCCCTTTTCTAAGTAAGACCAACAGATCGGAAGAGCGGTTTCAG     |
| chr19 | 10265166 | 10265205 | DNMT1_6664   | + | GTGACCTATGCACCAGACGTGGTTCAGCATCTCAGAGGACTGGGACGAGGATGTGGGCAGATCGGAAGAGCGGTTTCAG     |
| chr19 | 10265460 | 10265499 | DNMT1_6665   | + | GTGACCTATGCACCAGACGTAAACAGGTTTCTCTCATGCTTAAAGCCAAACTGGCTAAATCAGATCGGAAGAGCGGTTTCAG  |
| chr19 | 10265743 | 10265782 | DNMT1_6666   | + | GTGACCTATGCACCAGACGTGAGGAGGTTGTGAAAAGGGGCTGGAATCTGATGGCCAGATCGGAAGAGCGGTTTCAG       |
| chr19 | 10266632 | 10266671 | DNMT1_6667   | + | GTGACCTATGCACCAGACGTAAAGGAAATGACTAAAGGCTCTGACTCACATCCAAACAGATCGGAAGAGCGGTTTCAG      |
| chr19 | 10267196 | 10267235 | DNMT1_6668   | + | GTGACCTATGCACCAGACGTAAACAAAGCACATGCTTACCAGTAAGCCGTGAAGGCGGGTAGATCGGAAGAGCGGTTTCAG   |
| chr19 | 10270454 | 10270493 | DNMT1_6669   | + | GTGACCTATGCACCAGACGTGCGGGCTGGTGGAGCTGGGACGAGGATCGGACGAGGAGATCGGAAGAGCGGTTTCAG       |
| chr19 | 10270609 | 10270648 | DNMT1_6670   | + | GTGACCTATGCACCAGACGTAGGAACACAGATGATGGCATCAGAGGACGACTCCACAGCCAGATCGGAAGAGCGGTTTCAG   |

|       |           |           |             |   |                                                                                     |
|-------|-----------|-----------|-------------|---|-------------------------------------------------------------------------------------|
| chr19 | 10270750  | 10270789  | DNMT1_6671  | + | GTGACCTATGCACCAGACGTAATAAAGGGGAGGATTAAAGGCTAAGAGAGTGTTCACAGATCGGAAGAGCGGTTTCAG      |
| chr19 | 10271105  | 10271144  | DNMT1_6672  | + | GTGACCTATGCACCAGACGTAACAGATACACAGCAAGTAGCAGCTTAGAAACACTAACCAAGATCGGAAGAGCGGTTTCAG   |
| chr19 | 10273435  | 10273474  | DNMT1_6673  | + | GTGACCTATGCACCAGACGTAATAAAGGGGAGGTTAGAGAGATAAAGAAGGGAAAAAATTAAGATCGGAAGAGCGGTTTCAG  |
| chr19 | 10274047  | 10274086  | DNMT1_6674  | + | GTGACCTATGCACCAGACGTTAGACAACACACACAGGCTGGTCAGCTCGGGGGGGCCAGATCGGAAGAGCGGTTTCAG      |
| chr19 | 10277372  | 10277411  | DNMT1_6675  | + | GTGACCTATGCACCAGACGTTGGAAAAAACAAGTAAATTTTCCATTTGGTTTGGATAGATCGGAAGAGCGGTTTCAG       |
| chr19 | 10279051  | 10279090  | DNMT1_6676  | + | GTGACCTATGCACCAGACGTTAAATAACACAGACCCCAAGTGTGAGTCCAGAGAGCTTCCAGATCGGAAGAGCGGTTTCAG   |
| chr19 | 10283861  | 10283900  | DNMT1_6677  | + | GTGACCTATGCACCAGACGTTGAAAGGAAGAACAATAAAGATTAGAATACTGGTTTCAAGGAGATCGGAAGAGCGGTTTCAG  |
| chr19 | 10284592  | 10284631  | DNMT1_6678  | + | GTGACCTATGCACCAGACGTCAGTGAGGCCAACCTTAGTGAACAAGACCCTAGGCCCTCAGATCGGAAGAGCGGTTTCAG    |
| chr19 | 10286305  | 10286344  | DNMT1_6679  | + | GTGACCTATGCACCAGACGTTAAGAAAAAGCATTAAAAAGAAAAAAGCCACTATCAAGATCGGAAGAGCGGTTTCAG       |
| chr19 | 10288054  | 10288093  | DNMT1_6680  | + | GTGACCTATGCACCAGACGTTAAAGGATAATTAAGTAGCAGTGAATGTAAACAAGTGTCAAGATCGGAAGAGCGGTTTCAG   |
| chr19 | 10291256  | 10291295  | DNMT1_6681  | + | GTGACCTATGCACCAGACGTTAGATAGTTTAGCAGTACCCACATTTCCCAAGCTATTACAGATCGGAAGAGCGGTTTCAG    |
| chr19 | 10291572  | 10291611  | DNMT1_6682  | + | GTGACCTATGCACCAGACGTTGAAATAGGGGAGAAAATACAAACACTTGTAAAGCACTTCAAGATCGGAAGAGCGGTTTCAG  |
| chr19 | 10292764  | 10292803  | DNMT1_6683  | + | GTGACCTATGCACCAGACGTTCCAGCAGACGCGCGCGCGCAGCGCAGCGCCCGGCTTTAGATCGGAAGAGCGGTTTCAG     |
| chr19 | 10305586  | 10305625  | DNMT1_6684  | + | GTGACCTATGCACCAGACGTTGAGAGCACCAGGCTCGGCACCTGGGAGCGGAAACCAGATCGGAAGAGCGGTTTCAG       |
| chr12 | 56474177  | 56474216  | ERBB3_6685  | + | GTGACCTATGCACCAGACGTTCCACTCATAACGCTTTCCATATCCAGATCGGAAGAGCGGTTTCAG                  |
| chr12 | 56477697  | 56477736  | ERBB3_6686  | + | GTGACCTATGCACCAGACGTTCCCTCCTTCTCAACCTGCTCCTCTTTATCTCCCTAGATCGGAAGAGCGGTTTCAG        |
| chr12 | 56478976  | 56479015  | ERBB3_6687  | + | GTGACCTATGCACCAGACGTTGATGGTTCTTCCCTTCCCTCAGCCCTCAGCCAGCCCAAGACAGATCGGAAGAGCGGTTTCAG |
| chr12 | 56479107  | 56479146  | ERBB3_6688  | + | GTGACCTATGCACCAGACGTTCCCTAAGCAATAGAGGGGAGCTAGGATCGGAAGAGCGGTTTCAG                   |
| chr12 | 56480451  | 56480490  | ERBB3_6689  | + | GTGACCTATGCACCAGACGTTGATCAAGATTGCTCCCAAGTCCCAACCAACAGATGAAGATCGGAAGAGCGGTTTCAG      |
| chr12 | 56481437  | 56481476  | ERBB3_6690  | + | GTGACCTATGCACCAGACGTTCCCTCCTCAAACTTCACTCATAACGCTTTCCATATCCAGATCGGAAGAGCGGTTTCAG     |
| chr12 | 56481708  | 56481747  | ERBB3_6691  | + | GTGACCTATGCACCAGACGTTTCCATTTGCCTGGGTTCTGAAATTGGGATGTGCCCTTTGAGATCGGAAGAGCGGTTTCAG   |
| chr12 | 56481957  | 56481996  | ERBB3_6692  | + | GTGACCTATGCACCAGACGTTGAGGGGAAGAAACATGATCAACAATAGTAGATCCAAGATAGATCGGAAGAGCGGTTTCAG   |
| chr12 | 56482451  | 56482490  | ERBB3_6693  | + | GTGACCTATGCACCAGACGTTGTAAGAAGTTGTAAGAGACAGCCTTTCCCTCAGCAGATCGGAAGAGCGGTTTCAG        |
| chr12 | 56482663  | 56482702  | ERBB3_6694  | + | GTGACCTATGCACCAGACGTTCCCTCCTTCCCTTAGACCCACGCCACCCCTCAGATCGGAAGAGCGGTTTCAG           |
| chr12 | 56486615  | 56486654  | ERBB3_6695  | + | GTGACCTATGCACCAGACGTTGAGAGTTTCCCTTCTAGAAGAATAGGTGAACCACTGGCAGATCGGAAGAGCGGTTTCAG    |
| chr12 | 56486871  | 56486910  | ERBB3_6696  | + | GTGACCTATGCACCAGACGTTGGTATGAGGAAATGGCATCTTACAGCAATGAAGCCTGTGAGATCGGAAGAGCGGTTTCAG   |
| chr12 | 56487345  | 56487384  | ERBB3_6697  | + | GTGACCTATGCACCAGACGTTGGTCTGCTAGGTGGTGAGAATAGGAGTCAAGGAGGAGAAGATCGGAAGAGCGGTTTCAG    |
| chr12 | 56487691  | 56487730  | ERBB3_6698  | + | GTGACCTATGCACCAGACGTTGGGAGCAGTCAAGGATGGTGGGGTGGGGCCCTGCAATAGATCGGAAGAGCGGTTTCAG     |
| chr12 | 56487984  | 56488023  | ERBB3_6699  | + | GTGACCTATGCACCAGACGTTAGCAGCAGGATCTCAAGGGAGACAGAAGGGGCAATACAGATCGGAAGAGCGGTTTCAG     |
| chr12 | 56488351  | 56488390  | ERBB3_6700  | + | GTGACCTATGCACCAGACGTTGATAAAGGAGAGGGGTCAGGTGGAAGGGTAGGACCAAGATCGGAAGAGCGGTTTCAG      |
| chr12 | 56489105  | 56489144  | ERBB3_6701  | + | GTGACCTATGCACCAGACGTTGGAGATTCTGGAACTGGGGATATTTGGGAGTTGGGAAGATCGGAAGAGCGGTTTCAG      |
| chr12 | 56489601  | 56489640  | ERBB3_6702  | + | GTGACCTATGCACCAGACGTTAGCTTACTTTTTGTTTTTCTTTTTCTTTTTTGCATGTCCTAGATCGGAAGAGCGGTTTCAG  |
| chr12 | 56490417  | 56490456  | ERBB3_6703  | + | GTGACCTATGCACCAGACGTTATAGGAATTTCTGGAGAGTGGGGAAAGGCATCTAGGGCAAAGATCGGAAGAGCGGTTTCAG  |
| chr12 | 56490641  | 56490680  | ERBB3_6704  | + | GTGACCTATGCACCAGACGTTGAATTTCTGTATGCCGTAGGAGAGGACAATATAGATAGATCGGAAGAGCGGTTTCAG      |
| chr12 | 56491025  | 56491064  | ERBB3_6705  | + | GTGACCTATGCACCAGACGTTCTCTAGGGCTTCTCAATTTTCTCGAATTTCTCGGGGAGATCGGAAGAGCGGTTTCAG      |
| chr12 | 56491735  | 56491774  | ERBB3_6706  | + | GTGACCTATGCACCAGACGTTACAAGGGTAAGGAGGCGGGGGTGGAGTGAAGCATGGGAAGATCGGAAGAGCGGTTTCAG    |
| chr12 | 56492370  | 56492409  | ERBB3_6707  | + | GTGACCTATGCACCAGACGTTGGATGCCCTCTCTACCATCACTGGCCCAAGTTTCAAATAGATCGGAAGAGCGGTTTCAG    |
| chr12 | 56493540  | 56493579  | ERBB3_6708  | + | GTGACCTATGCACCAGACGTTAGTAGGAGTGTCTAAGGAAATTTAGAAAAGGAGGAGTTGAGATCGGAAGAGCGGTTTCAG   |
| chr12 | 56493824  | 56493863  | ERBB3_6709  | + | GTGACCTATGCACCAGACGTTTCTAATTACCAACACTTTGCACCCTGAGCCCTCACAAAAGATCGGAAGAGCGGTTTCAG    |
| chr12 | 56494040  | 56494079  | ERBB3_6710  | + | GTGACCTATGCACCAGACGTTTCTGAGAGGCTGGTTTATAGGATGATACGATAGATCGGAAGAGCGGTTTCAG           |
| chr12 | 56495156  | 56495195  | ERBB3_6711  | + | GTGACCTATGCACCAGACGTTCTCCTAGGGCTTCTCAATTTTCTCGAATTTCTCGAGATCGGAAGAGCGGTTTCAG        |
| chr12 | 56495850  | 56495889  | ERBB3_6712  | + | GTGACCTATGCACCAGACGTTCTGTGGCACTCAGGGAGCATTTAATGGCAGCTAGTGCCTTAGATCGGAAGAGCGGTTTCAG  |
| chr12 | 56495856  | 56495895  | ERBB3_6713  | + | GTGACCTATGCACCAGACGTTACTATGAATATATGAATCGGCAACGAGATGGAGGTGGTCCAGATCGGAAGAGCGGTTTCAG  |
| chr9  | 139392021 | 139392060 | NOTCH1_6714 | + | GTGACCTATGCACCAGACGTTAGGGCGGGGGCCGGTGGGGGGGCCAGGCCAGGCGTGGGGAGATCGGAAGAGCGGTTTCAG   |
| chr9  | 139393459 | 139393498 | NOTCH1_6715 | + | GTGACCTATGCACCAGACGTTGAAGCAGATGGGCTAGGTTGGAGCCAGCTGGAGCAACCAGATCGGAAGAGCGGTTTCAG    |
| chr9  | 139393722 | 139393761 | NOTCH1_6716 | + | GTGACCTATGCACCAGACGTTGGAGAGGCTCAGCGGGTGTGCTGGCAGACGTTACAGATCGGAAGAGCGGTTTCAG        |
| chr9  | 139395310 | 139395349 | NOTCH1_6717 | + | GTGACCTATGCACCAGACGTTAGAGACGGGTGCTCAGTCTGGAGGGCCGGTCCCAAGCTGCAGATCGGAAGAGCGGTTTCAG  |
| chr9  | 139396376 | 139396415 | NOTCH1_6718 | + | GTGACCTATGCACCAGACGTTGAGTGAGCAGAGCCTGTGAGGGCAGCCCGGCAGCAGGTGAGATCGGAAGAGCGGTTTCAG   |
| chr9  | 139396551 | 139396590 | NOTCH1_6719 | + | GTGACCTATGCACCAGACGTTAGGGGTGAGAAAGTAGAGGCTGAGCGAGCTCCCTAGGAAGCAGATCGGAAGAGCGGTTTCAG |
| chr9  | 139396951 | 139396990 | NOTCH1_6720 | + | GTGACCTATGCACCAGACGTTGGGGCCAGGGGCGAGTGGCCGGACATCAGGCAGCGGCTAAGATCGGAAGAGCGGTTTCAG   |
| chr9  | 139397793 | 139397832 | NOTCH1_6721 | + | GTGACCTATGCACCAGACGTTATCAGAGAGGGGCTGGGACCCGAGGCTTCTCCTCCCAAGATCGGAAGAGCGGTTTCAG     |
| chr9  | 139399567 | 139399606 | NOTCH1_6722 | + | GTGACCTATGCACCAGACGTTCCGACACGCTCAGGCCCTTCTCGGGGGCCCTCGCAGATCGGAAGAGCGGTTTCAG        |
| chr9  | 139400344 | 139400383 | NOTCH1_6723 | + | GTGACCTATGCACCAGACGTTGGGAAGACAGGACGGTGTGGGGTGGGCCACCCCGCCAGATCGGAAGAGCGGTTTCAG      |
| chr9  | 139401102 | 139401141 | NOTCH1_6724 | + | GTGACCTATGCACCAGACGTTGAGCAGGGCAGTGAGAGGCTCACCTGCTGCCACACGCAGATCGGAAGAGCGGTTTCAG     |
| chr9  | 139401436 | 139401475 | NOTCH1_6725 | + | GTGACCTATGCACCAGACGTTAGTTTCTGTCAGTGGCCAAAGCCCGCCACACCCCGCCCTAGATCGGAAGAGCGGTTTCAG   |
| chr9  | 139401900 | 139401939 | NOTCH1_6726 | + | GTGACCTATGCACCAGACGTTGAGCAAGAGGGGCGCTTCCGCTCAGCCGGCCAGGATAGATCGGAAGAGCGGTTTCAG      |
| chr9  | 139402602 | 139402641 | NOTCH1_6727 | + | GTGACCTATGCACCAGACGTTGGGTGGTAGCAGGTGAGGCCAGCCACAGAGACCAGATCGGAAGAGCGGTTTCAG         |
| chr9  | 139402848 | 139402887 | NOTCH1_6728 | + | GTGACCTATGCACCAGACGTTATGGGGTACAGTGGTGGCCGCGCCCGGCTTTCCCAAGATCGGAAGAGCGGTTTCAG       |

|       |           |           |             |   |                                                                                     |
|-------|-----------|-----------|-------------|---|-------------------------------------------------------------------------------------|
| chr9  | 139403534 | 139403573 | NOTCH1_6729 | + | GTGACCTATGCACCAGACGTGTGGGCAGCGGGGGCTGAGTGGAGGGCATTGGTGGGTCCAGATCGGAAGAGCGGTTTCAG    |
| chr9  | 139404424 | 139404463 | NOTCH1_6730 | + | GTGACCTATGCACCAGACGTACGGAAGGGTGTAGTGTGAGGGGACAGGCACAAACCCACACCAGATCGGAAGAGCGGTTTCAG |
| chr9  | 139405268 | 139405307 | NOTCH1_6731 | + | GTGACCTATGCACCAGACGTGGAGGAGGCCGGTTGGTACCAGCGGCCCTGGCCCTCCAAGATCGGAAGAGCGGTTTCAG     |
| chr9  | 139405734 | 139405773 | NOTCH1_6732 | + | GTGACCTATGCACCAGACGTGAGACACACGTGACCCCGGGAGCCTCACCCAGAGGGATCTAGATCGGAAGAGCGGTTTCAG   |
| chr9  | 139407597 | 139407636 | NOTCH1_6733 | + | GTGACCTATGCACCAGACGTGGGGACAGCACTCGGCATGTCCAGCACTCCCAGGCACCTTAGATCGGAAGAGCGGTTTCAG   |
| chr9  | 139408000 | 139408309 | NOTCH1_6734 | + | GTGACCTATGCACCAGACGTGACCACACTGCAGGTGCAGGGAGGCCGAGCAGCAGCCAGATCGGAAGAGCGGTTTCAG      |
| chr9  | 139409165 | 139409204 | NOTCH1_6735 | + | GTGACCTATGCACCAGACGTGGCGGGTGCAGACTCCGAGGCCAGCCAGCCGAGGGGTCCCAAGATCGGAAGAGCGGTTTCAG  |
| chr9  | 139409863 | 139409902 | NOTCH1_6736 | + | GTGACCTATGCACCAGACGTGGCAGCTGTGGTCTCAGGCCCCGCCCTGCCACTGAGATCGGAAGAGCGGTTTCAG         |
| chr9  | 139410179 | 139410218 | NOTCH1_6737 | + | GTGACCTATGCACCAGACGTGGAGGGGGCGGCACAGGAAGACTTAGGACTGGCGGCCCCAGATCGGAAGAGCGGTTTCAG    |
| chr9  | 139410557 | 139410596 | NOTCH1_6738 | + | GTGACCTATGCACCAGACGTGGAGGGGAGGGGAGGGAGTCAATGTGCAACAGCACTATGGCAGATCGGAAGAGCGGTTTCAG  |
| chr9  | 139411848 | 139411887 | NOTCH1_6739 | + | GTGACCTATGCACCAGACGTGGGCAACAGTGTAGGGGGGACCGCGGCCCCAGTGGCCCCAAGATCGGAAGAGCGGTTTCAG   |
| chr9  | 139412400 | 139412439 | NOTCH1_6740 | + | GTGACCTATGCACCAGACGTACACCGGTTGAGAGGCTGCTCCAGCCACCTGGCCCTGCAGATCGGAAGAGCGGTTTCAG     |
| chr9  | 139412755 | 139412794 | NOTCH1_6741 | + | GTGACCTATGCACCAGACGTAGCCGGCTCAGTGGGACCGGCCCTGGGCCAGGCATGGCAGATCGGAAGAGCGGTTTCAG     |
| chr9  | 139413287 | 139413326 | NOTCH1_6742 | + | GTGACCTATGCACCAGACGTGAGGAGCTGTGGCCCCGGGAGCTGCCACTCCCTGAGCTAGATCGGAAGAGCGGTTTCAG     |
| chr9  | 139414028 | 139414067 | NOTCH1_6743 | + | GTGACCTATGCACCAGACGTAGGGGGCGGGTACGCCTCTCCCTGAGGTCCAGTCCGGCTAGATCGGAAGAGCGGTTTCAG    |
| chr9  | 139417651 | 139417690 | NOTCH1_6744 | + | GTGACCTATGCACCAGACGTGGGGACAAGAGGGTCTGCTGCCCTCACTGCTCCCCGAGGAGATCGGAAGAGCGGTTTCAG    |
| chr9  | 139418442 | 139418481 | NOTCH1_6745 | + | GTGACCTATGCACCAGACGTATGTGCCAGGGCAGTTAGTCTCCCACTGCTTCCCAGCGCAGATCGGAAGAGCGGTTTCAG    |
| chr9  | 139438565 | 139438604 | NOTCH1_6746 | + | GTGACCTATGCACCAGACGTGACGGAGAAGAGGTTAGTCACTCCCGCACCACCACAGATCGGAAGAGCGGTTTCAG        |
| chr9  | 139440249 | 139440288 | NOTCH1_6747 | + | GTGACCTATGCACCAGACGTGGCTGCCCTCTCGCCCCGGGCGCGCCCTCTGCGTGGAGATCGGAAGAGCGGTTTCAG       |
| chr9  | 139400058 | 139400097 | NOTCH1_6748 | + | GTGACCTATGCACCAGACGTGTAGTCCAGGATGTGGCACAAGAGCCGTTGAATTTGGCGAGATCGGAAGAGCGGTTTCAG    |
| chr9  | 139391029 | 139391068 | NOTCH1_6749 | + | GTGACCTATGCACCAGACGTGTGGCTGCACCTGCTGGGTCTGCACCAGGTGAGGCTGGGTAGATCGGAAGAGCGGTTTCAG   |
| chr9  | 139391525 | 139391564 | NOTCH1_6750 | + | GTGACCTATGCACCAGACGTGGGGAGGGCAGGTGGCGGGCAGGGCCACGCTGTGACAGGAGATCGGAAGAGCGGTTTCAG    |
| chr12 | 4383412   | 4383451   | CCND2_6751  | + | GTGACCTATGCACCAGACGTGGTGGCGCTCCAGGAGCCAGGACCCCTCCGGATCTCAGATCGGAAGAGCGGTTTCAG       |
| chr12 | 4385397   | 4385436   | CCND2_6752  | + | GTGACCTATGCACCAGACGTGCCCTCTCCCTCTCTTCTTCCGATTCCCGCTTTCCCAGATCGGAAGAGCGGTTTCAG       |
| chr12 | 4388096   | 4388135   | CCND2_6753  | + | GTGACCTATGCACCAGACGTGCTTGGAGCCGGGAGGGAGATGGGGAGGCTCTTTTGGGAGAGATCGGAAGAGCGGTTTCAG   |
| chr12 | 4398167   | 4398206   | CCND2_6754  | + | GTGACCTATGCACCAGACGTACCACCTTCTTGGCTAAGTCCAGATGTCTCTTCTCAGCTCAGATCGGAAGAGCGGTTTCAG   |
| chr12 | 4409186   | 4409225   | CCND2_6755  | + | GTGACCTATGCACCAGACGTGGGGCGAAAGAGAGAGACGCGTCCATAATCTGGTCTCTTAGATCGGAAGAGCGGTTTCAG    |
| chr8  | 128748880 | 128748919 | MYC_6756    | + | GTGACCTATGCACCAGACGTAAGTCCACTGGCCTTTAATTTATTTTTTATCACTTTAAAGATCGGAAGAGCGGTTTCAG     |
| chr8  | 128751276 | 128751315 | MYC_6757    | + | GTGACCTATGCACCAGACGTCCCGCCAGCCGTGTCAAAGTGGCGGCTGGATACCTTTAGATCGGAAGAGCGGTTTCAG      |
| chr8  | 128753215 | 128753254 | MYC_6758    | + | GTGACCTATGCACCAGACGTGAAACAGATTCTCTTAAAGATAAATGCTCCTGAGCAATCAAGATCGGAAGAGCGGTTTCAG   |
| chr8  | 128750890 | 128750929 | MYC_6759    | + | GTGACCTATGCACCAGACGTATCATCATCCAGGACTGTATGTGGAGCGGCTTCTCGGCCGAGATCGGAAGAGCGGTTTCAG   |
| chr8  | 128752933 | 128752972 | MYC_6760    | + | GTGACCTATGCACCAGACGTCCGAGGAGAATGTCAAAGGGCAACACACAAGTCTTGAAGATCGGAAGAGCGGTTTCAG      |
| chr1  | 115251286 | 115251325 | NRAS_6761   | + | GTGACCTATGCACCAGACGTAAAAAATGAAAAAATGAGAGAGGCTAGCTCAACGGACACAGATCGGAAGAGCGGTTTCAG    |
| chr1  | 115256610 | 115256649 | NRAS_6762   | + | GTGACCTATGCACCAGACGTGGAGGGTAAGGGGACGGGAGGGAGGGAAAGTTCAATTTTAGATCGGAAGAGCGGTTTCAG    |
| chr1  | 115258792 | 115258831 | NRAS_6763   | + | GTGACCTATGCACCAGACGTAAAGGCTGGTGGAAACAGTAATCAGGGTTAATTTGGCGAGATCGGAAGAGCGGTTTCAG     |
| chr19 | 40739869  | 40739908  | AKT2_6764   | + | GTGACCTATGCACCAGACGTGAGAGGTGGATGGGGAGGACCAGTCAAGGAGAGGGCCTGGGAGATCGGAAGAGCGGTTTCAG  |
| chr19 | 40741065  | 40741104  | AKT2_6765   | + | GTGACCTATGCACCAGACGTGAGGAGCTCAGGCTCAGGGACCCTGAGGCCAGGAGCCTCAGATCGGAAGAGCGGTTTCAG    |
| chr19 | 40741268  | 40741307  | AKT2_6766   | + | GTGACCTATGCACCAGACGTACGGCCGTCAGCACCTGCCTCCCGAGCAGCTGGTTCGGAGATCGGAAGAGCGGTTTCAG     |
| chr19 | 40742022  | 40742061  | AKT2_6767   | + | GTGACCTATGCACCAGACGTAGGAGAAATGAGGGCTGGGCCCTGGCCCTGAGGCTGGCAAGATCGGAAGAGCGGTTTCAG    |
| chr19 | 40742303  | 40742342  | AKT2_6768   | + | GTGACCTATGCACCAGACGTAGTCAACGGATCTCAGGTGCATCTCCCAAGCTTCTCGAGATCGGAAGAGCGGTTTCAG      |
| chr19 | 40744009  | 40744048  | AKT2_6769   | + | GTGACCTATGCACCAGACGTAAAGGGTGGGGAGGAGGAGGCTCAGGCCCCAGCCACCACAGATCGGAAGAGCGGTTTCAG    |
| chr19 | 40744891  | 40744930  | AKT2_6770   | + | GTGACCTATGCACCAGACGTAAGGCAGCAGGGTGGGAGGTGGGAGGGAGGAGGGCTCTGCAGATCGGAAGAGCGGTTTCAG   |
| chr19 | 40746028  | 40746067  | AKT2_6771   | + | GTGACCTATGCACCAGACGTACTGCGGGTGAAGGGCTGGTGGGCAACACCACACCTGCCAGATCGGAAGAGCGGTTTCAG    |
| chr19 | 40747987  | 40748026  | AKT2_6772   | + | GTGACCTATGCACCAGACGTGAGGGAGTGGGGCAGTCAAGCCCTGGCTCATGGCCCCAGATCGGAAGAGCGGTTTCAG      |
| chr19 | 40748605  | 40748644  | AKT2_6773   | + | GTGACCTATGCACCAGACGTACACAGTGTAGTCCCAGACGCCAGGAGTCTGGGCCCTCAGAGATCGGAAGAGCGGTTTCAG   |
| chr19 | 40761187  | 40761226  | AKT2_6774   | + | GTGACCTATGCACCAGACGTAGGAAACAGACAGCAGGAGGGGATAGCCCTGCTAAGATCGGAAGAGCGGTTTCAG         |
| chr19 | 40762972  | 40763011  | AKT2_6775   | + | GTGACCTATGCACCAGACGTGAGGAAAGGGAGGGAGAGAGGTTAGGACAAGGTTGAGTGAAGATCGGAAGAGCGGTTTCAG   |
| chr19 | 40771185  | 40771224  | AKT2_6776   | + | GTGACCTATGCACCAGACGTTGGTACGCTGTCACTAGCTCGGGACAGCTCAGGGCAGCAAGATCGGAAGAGCGGTTTCAG    |
| chr16 | 3779886   | 3779925   | CREBBP_6777 | + | GTGACCTATGCACCAGACGTGAAAGGGGACAGGCCGGTGTCAAGCATGGACCCAGTACCAGATCGGAAGAGCGGTTTCAG    |
| chr16 | 3781485   | 3781524   | CREBBP_6778 | + | GTGACCTATGCACCAGACGTGGAGGGGCTTGTAGTCCCACACAAGGGACATGGCACCTCCAAGATCGGAAGAGCGGTTTCAG  |
| chr16 | 3781949   | 3781988   | CREBBP_6779 | + | GTGACCTATGCACCAGACGTACGCAAGGCTGTGAGACAGGCAAGTGGCCCTCCACCTTAGATCGGAAGAGCGGTTTCAG     |
| chr16 | 3786215   | 3786254   | CREBBP_6780 | + | GTGACCTATGCACCAGACGTAAGCAGCAACAGTGAAGATGAGGGCCATGACGCGCTCCCTCAGATCGGAAGAGCGGTTTCAG  |
| chr16 | 3786827   | 3786866   | CREBBP_6781 | + | GTGACCTATGCACCAGACGTACGCACACACGTGATGAACGTGCCAGTGAATCGGCCAGATCGGAAGAGCGGTTTCAG       |
| chr16 | 3788684   | 3788723   | CREBBP_6782 | + | GTGACCTATGCACCAGACGTGAGGCACATGTTAACTCAGGGTATCCCTCAAATCTGAAAAGATCGGAAGAGCGGTTTCAG    |
| chr16 | 3789736   | 3789775   | CREBBP_6783 | + | GTGACCTATGCACCAGACGTAGCCAGAGCCGACATTTACAAAAGCTGTTGCTGACAAGGAGATCGGAAGAGCGGTTTCAG    |
| chr16 | 3790561   | 3790600   | CREBBP_6784 | + | GTGACCTATGCACCAGACGTGAGAAGGAGCAGGTGAGAGGGCTTCAACAGCACTGTGAGAGATCGGAAGAGCGGTTTCAG    |
| chr16 | 3794973   | 3795012   | CREBBP_6785 | + | GTGACCTATGCACCAGACGTATAGGGTATGATGAGACTGTATAATGATGATAAATGTAGATCGGAAGAGCGGTTTCAG      |
| chr16 | 3795366   | 3795405   | CREBBP_6786 | + | GTGACCTATGCACCAGACGTAAGAAGGCCACTGTTAAAGCACACCGAACCCACAAGACCAAGATCGGAAGAGCGGTTTCAG   |

|       |           |           |             |   |                                                                                      |
|-------|-----------|-----------|-------------|---|--------------------------------------------------------------------------------------|
| chr16 | 3799695   | 3799734   | CREBBP_6787 | + | GTGACCTATGCACCAGACGTAATAAGAAAACATGTTTTATTAATAAAATTTATCTGTTGAGATCGGAAGAGCGGTTCCAG     |
| chr16 | 3801818   | 3801857   | CREBBP_6788 | + | GTGACCTATGCACCAGACGTAAGGCCATACTTGGGTGAAGTCCATCATAACACACAAGATCGGAAGAGCGGTTCCAG        |
| chr16 | 3807388   | 3807427   | CREBBP_6789 | + | GTGACCTATGCACCAGACGTAAGGAGAAATACTTTTATATAAAAAATACATTCCATTTCAGATCGGAAGAGCGGTTCCAG     |
| chr16 | 3808060   | 3808099   | CREBBP_6790 | + | GTGACCTATGCACCAGACGTAATAAATGGTCTCAGTATAGGGAATCCCCAATATCCAAAAGATCGGAAGAGCGGTTCCAG     |
| chr16 | 3808984   | 3809023   | CREBBP_6791 | + | GTGACCTATGCACCAGACGTAACATCAAGAAAAGACACTTTGTAAAAGGTGCTCAGATCCAGATCGGAAGAGCGGTTCCAG    |
| chr16 | 3817921   | 3817960   | CREBBP_6792 | + | GTGACCTATGCACCAGACGTACATTACAGATAACATATGAATATCAAAACCTTTATGTTAGATCGGAAGAGCGGTTCCAG     |
| chr16 | 3819365   | 3819404   | CREBBP_6793 | + | GTGACCTATGCACCAGACGTACCAGAAAGCACTGCTCAGTAAAGCAAGGTAAACATAAATAGATCGGAAGAGCGGTTCCAG    |
| chr16 | 3820998   | 3821037   | CREBBP_6794 | + | GTGACCTATGCACCAGACGTTGGACAGAGTATGGTAAAATTTATTTCCCGCTTTGAAAATAGATCGGAAGAGCGGTTCCAG    |
| chr16 | 3823942   | 3823981   | CREBBP_6795 | + | GTGACCTATGCACCAGACGTACAAGCACCACCAGAGCTGTAGTTGGAAGCTGACGGCCAAGATCGGAAGAGCGGTTCCAG     |
| chr16 | 3824705   | 3824744   | CREBBP_6796 | + | GTGACCTATGCACCAGACGTACCACAACCGGTTCAATAGAAAAGCACCACAGGAAAACAGATCGGAAGAGCGGTTCCAG      |
| chr16 | 3828194   | 3828233   | CREBBP_6797 | + | GTGACCTATGCACCAGACGTATAATATTCAATATGAAACAGTTAAAACGTAAAAGCAAAAGATCGGAAGAGCGGTTCCAG     |
| chr16 | 3828829   | 3828868   | CREBBP_6798 | + | GTGACCTATGCACCAGACGTAACACATCTATCAACTACTTTTTTTTTTTCTTTTITTTAGATCGGAAGAGCGGTTCCAG      |
| chr16 | 3830890   | 3830929   | CREBBP_6799 | + | GTGACCTATGCACCAGACGTAATAAGACACTTTCATCCTACTGAAAGTGACTCAAAACAAGATCGGAAGAGCGGTTCCAG     |
| chr16 | 3831318   | 3831357   | CREBBP_6800 | + | GTGACCTATGCACCAGACGTAGAAAAGAAATCAATCAACAGTTAAATTTAATATATACTAGATCGGAAGAGCGGTTCCAG     |
| chr16 | 3832938   | 3832977   | CREBBP_6801 | + | GTGACCTATGCACCAGACGTAACAGACAGACAGACAAAACGAGAGGTAAGTAAAAGGGAGATCGGAAGAGCGGTTCCAG      |
| chr16 | 3842106   | 3842145   | CREBBP_6802 | + | GTGACCTATGCACCAGACGTAATAAACAACGAGATGTTATTTTTCTATCCAATCGTCAAAAGATCGGAAGAGCGGTTCCAG    |
| chr16 | 3843638   | 3843677   | CREBBP_6803 | + | GTGACCTATGCACCAGACGTGCAAAAATAAAAAACTTTAACCTCTCAGAGTTCCAAGAGATCGGAAGAGCGGTTCCAG       |
| chr16 | 3860791   | 3860830   | CREBBP_6804 | + | GTGACCTATGCACCAGACGTAAGAGGTAACACTCAGCTGTGGTACGCGAGTCAATATAAAAAGATCGGAAGAGCGGTTCCAG   |
| chr16 | 3901021   | 3901060   | CREBBP_6805 | + | GTGACCTATGCACCAGACGTAACAGAATAAGAAATGAGAAAAGTAAAGCAACCTTTACAGCTAGATCGGAAGAGCGGTTCCAG  |
| chr16 | 3900664   | 3900703   | CREBBP_6806 | + | GTGACCTATGCACCAGACGTGGTGGGCCAGAGGTGCTGGCTGCCTGTTTAGCGAGGCTGAGATCGGAAGAGCGGTTCCAG     |
| chr16 | 3778160   | 3778199   | CREBBP_6807 | + | GTGACCTATGCACCAGACGTCAGAATCCGCTGCTGCAGGGCTTGGTGGATGTTGGGGGTGAGATCGGAAGAGCGGTTCCAG    |
| chr16 | 3778591   | 3778630   | CREBBP_6808 | + | GTGACCTATGCACCAGACGTCGGGGCCGCGGCACGCCAGCTGCATGGCATTAGGTTCTGAGATCGGAAGAGCGGTTCCAG     |
| chr16 | 3779022   | 3779061   | CREBBP_6809 | + | GTGACCTATGCACCAGACGTCACCTGGTTGGTGGTGGGCACATTCAGGCTCACGGGGAGATCGGAAGAGCGGTTCCAG       |
| chr16 | 3779453   | 3779492   | CREBBP_6810 | + | GTGACCTATGCACCAGACGTCATGAGCTGGGCTGCTGCAGCGGTGCTGGATCTGCTGCAGATCGGAAGAGCGGTTCCAG      |
| chr22 | 30000112  | 30000151  | NF2_6811    | + | GTGACCTATGCACCAGACGTTGGCAGCCCCGACTGCTGCGGTGACAGTGCAGGTGGAAGCTAGATCGGAAGAGCGGTTCCAG   |
| chr22 | 30032876  | 30032915  | NF2_6812    | + | GTGACCTATGCACCAGACGTAACCTCGATGAACTGGTGGGGCTGACGTGAGCTTTCCAGTAGATCGGAAGAGCGGTTCCAG    |
| chr22 | 30035212  | 30035251  | NF2_6813    | + | GTGACCTATGCACCAGACGTCAGGCTACCCCCAGTTCTGAGAGAAGTTCGCCAGGAGTATCGGAAGAGCGGTTCCAG        |
| chr22 | 30038285  | 30038324  | NF2_6814    | + | GTGACCTATGCACCAGACGTAGAAGAAAAATGATTTTTCTAGGCGGTTAATTTGGGTCAAGATCGGAAGAGCGGTTCCAG     |
| chr22 | 30050725  | 30050764  | NF2_6815    | + | GTGACCTATGCACCAGACGTAATTCCTTTTTCAGGAAGACATGACAGATATGGTCTAAGATCGGAAGAGCGGTTCCAG       |
| chr22 | 30051676  | 30051715  | NF2_6816    | + | GTGACCTATGCACCAGACGTTTCATTGTTGGTTTACATTCCTTTATGGGCTTTTTTTTTTAGATCGGAAGAGCGGTTCCAG    |
| chr22 | 30054264  | 30054303  | NF2_6817    | + | GTGACCTATGCACCAGACGTACCTCTCTGAGCTCCTTGTTAGTAGACAGAGACTGAGTGCAGATCGGAAGAGCGGTTCCAG    |
| chr22 | 30057339  | 30057378  | NF2_6818    | + | GTGACCTATGCACCAGACGTTGTGTACTGCAGATGGGTCCAGCAGATCTTCCCTGTCTGAGATCGGAAGAGCGGTTCCAG     |
| chr22 | 30061064  | 30061103  | NF2_6819    | + | GTGACCTATGCACCAGACGTATCCTGGTTTTCTACTGATAATGGTAGCTTTTCTGAGAAGATCGGAAGAGCGGTTCCAG      |
| chr22 | 30064446  | 30064485  | NF2_6820    | + | GTGACCTATGCACCAGACGTCCTTGGTTTAACTGATGATGTCAGTGTGGTGCAGTCTGAGATCGGAAGAGCGGTTCCAG      |
| chr22 | 30067948  | 30067987  | NF2_6821    | + | GTGACCTATGCACCAGACGTTAGGGCTGAGGGTCCAGGACTGCTTGGGGACTTCTTGGAGATCGGAAGAGCGGTTCCAG      |
| chr22 | 30069486  | 30069525  | NF2_6822    | + | GTGACCTATGCACCAGACGTACCGGGCACCAGACTGGCAGGAGGCTGGCGAAGGGCCGAGATCGGAAGAGCGGTTCCAG      |
| chr22 | 30070941  | 30070980  | NF2_6823    | + | GTGACCTATGCACCAGACGTTGGGCCACCAGCTGGGGCTGCCTTAGTCTGGTGATGTTCTAGATCGGAAGAGCGGTTCCAG    |
| chr22 | 30074323  | 30074362  | NF2_6824    | + | GTGACCTATGCACCAGACGTCCTGTGCCCTGCTGTGGGCAGCTGTGAAGTACTGAGTGCAGATCGGAAGAGCGGTTCCAG     |
| chr22 | 30077601  | 30077640  | NF2_6825    | + | GTGACCTATGCACCAGACGTTCTCTTTCTTGTATTTTGTCTGATCAGGACCATCATAATGAGATCGGAAGAGCGGTTCCAG    |
| chr22 | 30079055  | 30079094  | NF2_6826    | + | GTGACCTATGCACCAGACGTTAGGTTGTTCACAGTACTCTATGTGGTATGGTGCAGATCGGAAGAGCGGTTCCAG          |
| chr22 | 30090802  | 30090841  | NF2_6827    | + | GTGACCTATGCACCAGACGTTAGGCTGAGGCCACCCCAAGTCCACTCTCTCTGCTACCAGGACAGATCGGAAGAGCGGTTCCAG |
| chr1  | 156785641 | 156785680 | NTRK1_6828  | + | GTGACCTATGCACCAGACGTTTTTCTCTCTCTCTCTGTCGCCAGCCCGTTGGCAGACAGATCGGAAGAGCGGTTCCAG       |
| chr1  | 156811996 | 156812035 | NTRK1_6829  | + | GTGACCTATGCACCAGACGTCCTGTGCAATCTCACCAGCCATTGGATCATTCCCCCAAGATCGGAAGAGCGGTTCCAG       |
| chr1  | 156830949 | 156830988 | NTRK1_6830  | + | GTGACCTATGCACCAGACGTTGGCGGGCGGTGGGGGGCGCGGGACAGGCAGGCATTGCAAGATCGGAAGAGCGGTTCCAG     |
| chr1  | 156834231 | 156834270 | NTRK1_6831  | + | GTGACCTATGCACCAGACGTCGGGGACTGTGGGTGTGGAGTCCAGATGGGCTGGGGGAAGATCGGAAGAGCGGTTCCAG      |
| chr1  | 156834602 | 156834641 | NTRK1_6832  | + | GTGACCTATGCACCAGACGTCAGTGTGGCAGTGGAGTTGGGAGGACACCAAGACTAGATCGGAAGAGCGGTTCCAG         |
| chr1  | 156836781 | 156836820 | NTRK1_6833  | + | GTGACCTATGCACCAGACGTTGCGCTTCCAGGGGCAAGAGCACCAAGTGTGTGTGCCTGAGATCGGAAGAGCGGTTCCAG     |
| chr1  | 156838052 | 156838091 | NTRK1_6834  | + | GTGACCTATGCACCAGACGTTGGTGGGGAGTGGTGTAAAGGGGCTGGGGAAGAGACCTAAGATCGGAAGAGCGGTTCCAG     |
| chr1  | 156838450 | 156838489 | NTRK1_6835  | + | GTGACCTATGCACCAGACGTTCTGCTGGCAGCCCCAAGAGGTCCAGGCAGACAGGAGATCGGAAGAGCGGTTCCAG         |
| chr1  | 156841558 | 156841597 | NTRK1_6836  | + | GTGACCTATGCACCAGACGTTGGCAGCTCCGGCACCACCCCTACTCATCTCTTCTCAGATCGGAAGAGCGGTTCCAG        |
| chr1  | 156843762 | 156843801 | NTRK1_6837  | + | GTGACCTATGCACCAGACGTCATCCTGAACCTGCCCCACTCGGGCTCCTCCTGGTAGATCGGAAGAGCGGTTCCAG         |
| chr1  | 156844203 | 156844242 | NTRK1_6838  | + | GTGACCTATGCACCAGACGTTCAAGTGGAGGGCAGGCTGCTGCTGGTCTCTGGAGTGCAGATCGGAAGAGCGGTTCCAG      |
| chr1  | 156844429 | 156844468 | NTRK1_6839  | + | GTGACCTATGCACCAGACGTAAGTAGAAGCTTGTGCAGACTTTGGACCGGGAGGCTGGGAGATCGGAAGAGCGGTTCCAG     |
| chr1  | 156844811 | 156844850 | NTRK1_6840  | + | GTGACCTATGCACCAGACGTTGCTGCAGAGGGCTGTCTGTCTGTCTGTTCTCCTGGCTTTGAGATCGGAAGAGCGGTTCCAG   |
| chr1  | 156846013 | 156846052 | NTRK1_6841  | + | GTGACCTATGCACCAGACGTTGCCCGGGGGTACTGCTGECCTGGGTCCACCCCAAGATCGGAAGAGCGGTTCCAG          |
| chr1  | 156846375 | 156846414 | NTRK1_6842  | + | GTGACCTATGCACCAGACGTTGGCTCAGCGCTGGCCCGGGCCCTGGCTGCTGGCCCCAGATCGGAAGAGCGGTTCCAG       |
| chr1  | 156849165 | 156849204 | NTRK1_6843  | + | GTGACCTATGCACCAGACGTTTTGTCCCAACGCTTCCCTGCCATCCAAACTGTAGACAAGATCGGAAGAGCGGTTCCAG      |
| chr1  | 156849960 | 156849999 | NTRK1_6844  | + | GTGACCTATGCACCAGACGTTGCCATGGTACCCTTGGCTGCCTCCCGTCCCATGCCAGATCGGAAGAGCGGTTCCAG        |

|       |           |           |               |   |                                                                                      |
|-------|-----------|-----------|---------------|---|--------------------------------------------------------------------------------------|
| chr1  | 156851445 | 156851484 | NTRK1_6845    | + | GTGACCTATGCACCAGACGTGAGGGGCTGGGAGTGGTTAGCCGGAATACTGGGGCCTGCCAGATCGGAAGAGCGGTTTCAG    |
| chr5  | 149495520 | 149495559 | PDGFRB_6846   | + | GTGACCTATGCACCAGACGTGAGGCAGTGAGTGAGGGGCTAGGAAGGAGCCAGGAGGATAGATCGGAAGAGCGGTTTCAG     |
| chr5  | 149498426 | 149498465 | PDGFRB_6847   | + | GTGACCTATGCACCAGACGTGGAGAAGGGTCAGGGCCTCTGGCCAGGGTTTCAGGGGACAAGATCGGAAGAGCGGTTTCAG    |
| chr5  | 149499140 | 149499179 | PDGFRB_6848   | + | GTGACCTATGCACCAGACGTGCAGAGACAAGAGATACACAGGCTCAGGGGTGAAAAGTGAGATCGGAAGAGCGGTTTCAG     |
| chr5  | 149499697 | 149499736 | PDGFRB_6849   | + | GTGACCTATGCACCAGACGTGTCAGGACAGGTGCTGAGTGCAAGGAAGGACCTCAGCCCCAGATCGGAAGAGCGGTTTCAG    |
| chr5  | 149500584 | 149500623 | PDGFRB_6850   | + | GTGACCTATGCACCAGACGTGGAGAGGGAGCTGAGGCCTTGGGACAATTGTGGGAAAAGATCGGAAGAGCGGTTTCAG       |
| chr5  | 149500896 | 149500935 | PDGFRB_6851   | + | GTGACCTATGCACCAGACGTAGACAGAGGGTCACTGCTCTTATATCTCTTCTGGCCAGATCGGAAGAGCGGTTTCAG        |
| chr5  | 149501614 | 149501653 | PDGFRB_6852   | + | GTGACCTATGCACCAGACGTAGGAGCATCACAGGAGAGCCCTGCAGGCTTTGCCTTCCCCTAGATCGGAAGAGCGGTTTCAG   |
| chr5  | 149502775 | 149502814 | PDGFRB_6853   | + | GTGACCTATGCACCAGACGTACAGGCTCAGGGACAGTCCCTATGGAGGCCCTCAGGCGTCCAGATCGGAAGAGCGGTTTCAG   |
| chr5  | 149503934 | 149503973 | PDGFRB_6854   | + | GTGACCTATGCACCAGACGTTGGGGGCCCCAGGCCAGGCCAGTTCATGGAGGCTCCATGGAGATCGGAAGAGCGGTTTCAG    |
| chr5  | 149504405 | 149504444 | PDGFRB_6855   | + | GTGACCTATGCACCAGACGTGATGATCCATTAGTCTCTGGCCTACCAGGAAGCTGCACCAGATCGGAAGAGCGGTTTCAG     |
| chr5  | 149505151 | 149505190 | PDGFRB_6856   | + | GTGACCTATGCACCAGACGTAACCCAGGAATAGTTATCAGAGGGAGTCTCAGGCCCTGAGATCGGAAGAGCGGTTTCAG      |
| chr5  | 149506188 | 149506227 | PDGFRB_6857   | + | GTGACCTATGCACCAGACGTAGATGAGAGAGGCCATGAGCAAACCTCAGCCAGCTACCCTCAGATCGGAAGAGCGGTTTCAG   |
| chr5  | 149509542 | 149509581 | PDGFRB_6858   | + | GTGACCTATGCACCAGACGTAGCCGGTAGGGTTGGCTGCCAGCCCCTTCCCCTTGCAGACAGATCGGAAGAGCGGTTTCAG    |
| chr5  | 149510236 | 149510275 | PDGFRB_6859   | + | GTGACCTATGCACCAGACGTAGAGCACTGAGTTAGGAGGCGGGAGGGTCAGGACAGTTAAAGATCGGAAGAGCGGTTTCAG    |
| chr5  | 149512516 | 149512555 | PDGFRB_6860   | + | GTGACCTATGCACCAGACGTTGACCGTCAAGGGCGGGGCCCTGGGGGCAGGGCACCACCTAGATCGGAAGAGCGGTTTCAG    |
| chr5  | 149513334 | 149513373 | PDGFRB_6861   | + | GTGACCTATGCACCAGACGTAGGTTGGGCGAGGCCCTCCAAATCAGGAGGGGGCCGGGAGAAGATCGGAAGAGCGGTTTCAG   |
| chr5  | 149513582 | 149513621 | PDGFRB_6862   | + | GTGACCTATGCACCAGACGTGAGATTGGCTTAGGTTAGGTTGGGAAAGTCAACCAGCCATAGATCGGAAGAGCGGTTTCAG    |
| chr5  | 149515452 | 149515491 | PDGFRB_6863   | + | GTGACCTATGCACCAGACGTGGAGGTATCAGACATCAGGAAACAGGGGCTTCAGCACTCAGATCGGAAGAGCGGTTTCAG     |
| chr5  | 149516621 | 149516660 | PDGFRB_6864   | + | GTGACCTATGCACCAGACGTAGAGTTAAACAGGAGTCAAGGGCCAGGGCAGGTGGAGGCAAGATCGGAAGAGCGGTTTCAG    |
| chr9  | 133589853 | 133589892 | ABL1_6865     | + | GTGACCTATGCACCAGACGTTTCAAAATTTCTGCTCATGGTTTTCTCATGCATTCTATAGATCGGAAGAGCGGTTTCAG      |
| chr9  | 133710923 | 133710962 | ABL1_6866     | + | GTGACCTATGCACCAGACGTGCCGCACGGGTTGGGCTGAGTAGCCGCGGCCCTCCCCTAGATCGGAAGAGCGGTTTCAG      |
| chr9  | 133729635 | 133729674 | ABL1_6867     | + | GTGACCTATGCACCAGACGTTGGGCGAGCTAGTGGTGGTTGCAGGAGATAGAAATCTGGAGATCGGAAGAGCGGTTTCAG     |
| chr9  | 133730494 | 133730533 | ABL1_6868     | + | GTGACCTATGCACCAGACGTTCTGGCAGGGGCGCTAGTGGCCAGGGCAGGGCAACCAAGATCGGAAGAGCGGTTTCAG       |
| chr9  | 133738433 | 133738472 | ABL1_6869     | + | GTGACCTATGCACCAGACGTACTGCCGGGGTGCCAGGGTACGTGGGGCAAGGCGTCTGAGATCGGAAGAGCGGTTTCAG      |
| chr9  | 133747611 | 133747650 | ABL1_6870     | + | GTGACCTATGCACCAGACGTCCGGGGCTCTGAAGAGAGGGTCTCGCGCCGACCCCCAGGAGATCGGAAGAGCGGTTTCAG     |
| chr9  | 133748435 | 133748474 | ABL1_6871     | + | GTGACCTATGCACCAGACGTGGCCAGGCAGCCCTGCGCCATGGAGTCAAGGGCGTGGAGCAGATCGGAAGAGCGGTTTCAG    |
| chr9  | 133750450 | 133750489 | ABL1_6872     | + | GTGACCTATGCACCAGACGTCTGCTGCACTGAAGTGGCTTCTCTGACTACAGGAGGGTTAGATCGGAAGAGCGGTTTCAG     |
| chr9  | 133753965 | 133754004 | ABL1_6873     | + | GTGACCTATGCACCAGACGTTCTCAGCCTTCTCAGGATATATGGGGCATTCCAGGAAAGATCGGAAGAGCGGTTTCAG       |
| chr9  | 133755555 | 133755594 | ABL1_6874     | + | GTGACCTATGCACCAGACGTCATCCCGGGGTACCTGCAAGTGGGTTGAAAGGGCAGCCATGAGATCGGAAGAGCGGTTTCAG   |
| chr9  | 133756062 | 133756101 | ABL1_6875     | + | GTGACCTATGCACCAGACGTGCTTCCCCAACCCCACTGCTTCCCTTCCCCTGCCAGAAGATCGGAAGAGCGGTTTCAG       |
| chr9  | 133761081 | 133761120 | ABL1_6876     | + | GTGACCTATGCACCAGACGTGGGTGAGGTGTGAGGCCGTGCGAGCTGCCTGCAGCACATAGATCGGAAGAGCGGTTTCAG     |
| chr9  | 133759795 | 133759834 | ABL1_6877     | + | GTGACCTATGCACCAGACGTTGGCAGTCCAGCAAGCGCTTCTGCGCTTCTGCTCCGCCAGATCGGAAGAGCGGTTTCAG      |
| chr9  | 133760224 | 133760263 | ABL1_6878     | + | GTGACCTATGCACCAGACGTGCCAGTGACCCCAAGGCAAGGCGTCCAGGTCAGCCAGATCGGAAGAGCGGTTTCAG         |
| chr9  | 133760653 | 133760692 | ABL1_6879     | + | GTGACCTATGCACCAGACGTGCCAGGGGACCGCCGTCTCCACCTTCCATCCCTCAGATCGGAAGAGCGGTTTCAG          |
| chr11 | 69456290  | 69456329  | CCND1_6880    | + | GTGACCTATGCACCAGACGTTCCGGCGGCTCTCTTAAGACTTCCCTGCAACTTGTGCCAGATCGGAAGAGCGGTTTCAG      |
| chr11 | 69458770  | 69458809  | CCND1_6881    | + | GTGACCTATGCACCAGACGTCCCGGCAGCCCCGGCCTCCCCTTGAGAGCCGGCTCCTTAAGATCGGAAGAGCGGTTTCAG     |
| chr11 | 69462921  | 69462960  | CCND1_6882    | + | GTGACCTATGCACCAGACGTGTGATGTCCAGGCGAGCCTTGGCCGGGGTTACAGGGGGAGAGATCGGAAGAGCGGTTTCAG    |
| chr11 | 69466061  | 69466100  | CCND1_6883    | + | GTGACCTATGCACCAGACGTGAGGCGGGCGCCACCGCCACCCGACGAGGGCGGAGCCGAGATCGGAAGAGCGGTTTCAG      |
| chr7  | 92244611  | 92244650  | CDK6_6884     | + | GTGACCTATGCACCAGACGTGAAAAAATAATTGGTTGATATACAATACATCAATGTAAGATCGGAAGAGCGGTTTCAG       |
| chr7  | 92247532  | 92247571  | CDK6_6885     | + | GTGACCTATGCACCAGACGTACCAACATGGACATAAGCACTTAGCTACTATGCAGAAGCTAGATCGGAAGAGCGGTTTCAG    |
| chr7  | 92252411  | 92252450  | CDK6_6886     | + | GTGACCTATGCACCAGACGTAAAGATACATTTAAATAAAGAAATGTTCTCAGATTACATTAGATCGGAAGAGCGGTTTCAG    |
| chr7  | 92300860  | 92300899  | CDK6_6887     | + | GTGACCTATGCACCAGACGTAAAGCGGATCCAAGTGTACTGAGAAGGTGGCTGTTGGCTTAGATCGGAAGAGCGGTTTCAG    |
| chr7  | 92355118  | 92355157  | CDK6_6888     | + | GTGACCTATGCACCAGACGTTAAAAAAGAAAATCAGTAAACACTCAAACGGAAGTTGAAGATCGGAAGAGCGGTTTCAG      |
| chr7  | 92404156  | 92404195  | CDK6_6889     | + | GTGACCTATGCACCAGACGTAAACAAAGAGGTTAAGTAGGTGCAATTAAGCAAAAGAAAGTAAAGATCGGAAGAGCGGTTTCAG |
| chr14 | 102548169 | 102548208 | HSP90AA1_6890 | + | GTGACCTATGCACCAGACGTAAACAAATCCTCATATTAACAAGATTTCTTAAAGCCAGTATCGGAAGAGCGGTTTCAG       |
| chr14 | 102548792 | 102548831 | HSP90AA1_6891 | + | GTGACCTATGCACCAGACGTAAAGTGATGACTAGAACCTAGAAAGATTAATTCCTAAACAGATCGGAAGAGCGGTTTCAG     |
| chr14 | 102549650 | 102549689 | HSP90AA1_6892 | + | GTGACCTATGCACCAGACGTACAAAGTTACTTTTTAGACCTTTTAAACAGTTAAGAATGGTTAGATCGGAAGAGCGGTTTCAG  |
| chr14 | 102550331 | 102550370 | HSP90AA1_6893 | + | GTGACCTATGCACCAGACGTTATAAACCAATGCACTGAGTCATTCCAAGGACAAAACCTGAGATCGGAAGAGCGGTTTCAG    |
| chr14 | 102550912 | 102550951 | HSP90AA1_6894 | + | GTGACCTATGCACCAGACGTACAGATACACTAAGTACCAATGAACAATGCATTATAGAAGAGATCGGAAGAGCGGTTTCAG    |
| chr14 | 102551346 | 102551385 | HSP90AA1_6895 | + | GTGACCTATGCACCAGACGTAAACAGGAAATACATCACTGCTCACTCAGAACTAAGCAGATCGGAAGAGCGGTTTCAG       |
| chr14 | 102551779 | 102551818 | HSP90AA1_6896 | + | GTGACCTATGCACCAGACGTAGAAAAGAAAATGACTTAAATACATTCAATTTAGTCTCAAGATCGGAAGAGCGGTTTCAG     |
| chr14 | 102552472 | 102552511 | HSP90AA1_6897 | + | GTGACCTATGCACCAGACGTAAAAATTAATTTAAGCATACAGCACCCCAAGAAGTTCAAGATCGGAAGAGCGGTTTCAG      |
| chr14 | 102552726 | 102552765 | HSP90AA1_6898 | + | GTGACCTATGCACCAGACGTACCGCGCCGGTTAAAACCTTGCAGGACGTCTACAGAGGCAGATCGGAAGAGCGGTTTCAG     |
| chr14 | 102568433 | 102568472 | HSP90AA1_6899 | + | GTGACCTATGCACCAGACGTAAACACAATCTTCTGGACTTCAAACCAAACATAACAGAGATCGGAAGAGCGGTTTCAG       |
| chr14 | 102605752 | 102605791 | HSP90AA1_6900 | + | GTGACCTATGCACCAGACGTGAGGGTACCCCGGCTGGCTCCGAAGCGGTGGCCGTAGATCGGAAGAGCGGTTTCAG         |
| chr19 | 1611859   | 1611898   | TCF3_6901     | + | GTGACCTATGCACCAGACGTGGGGGAGAGCTGTGGGAGAGCCGTTCCAGGGAGGGAAGATCGGAAGAGCGGTTTCAG        |
| chr19 | 1612443   | 1612482   | TCF3_6902     | + | GTGACCTATGCACCAGACGTGCACCAGGCCCTGTTAGTGATGCGCCAAGGCTGGAGTGGAGATCGGAAGAGCGGTTTCAG     |

|       |          |          |             |   |                                                                                      |
|-------|----------|----------|-------------|---|--------------------------------------------------------------------------------------|
| chr19 | 1615530  | 1615569  | TCF3_6903   | + | GTGACCTATGCACCAGACGTGGCCCGGGAGGGGGCCAGAGGGAGACAGTGAAGTTGGGGAGATCGGAAGAGCGGTTTCAG     |
| chr19 | 1615831  | 1615870  | TCF3_6904   | + | GTGACCTATGCACCAGACGCTCCTAGGGTCAGGGGCTCGCTCGGCCTCCAGGGCCAAGTGAAGATCGGAAGAGCGGTTTCAG   |
| chr19 | 1619244  | 1619283  | TCF3_6905   | + | GTGACCTATGCACCAGACGTGGGGAGACGGGTGCATCAGGGGGAGCCGGGTCCCGCCCAAGATCGGAAGAGCGGTTTCAG     |
| chr19 | 1619484  | 1619523  | TCF3_6906   | + | GTGACCTATGCACCAGACGTGGGGGATGGTGTGAGGGGCCAAGCCGAGGGACCCACAGATCGGAAGAGCGGTTTCAG        |
| chr19 | 1619863  | 1619902  | TCF3_6907   | + | GTGACCTATGCACCAGACGTGTGGGGACGTGAATGGGGTGCAGAGGGCGGGGTGTGAGCAAGATCGGAAGAGCGGTTTCAG    |
| chr19 | 1621056  | 1621095  | TCF3_6908   | + | GTGACCTATGCACCAGACGTGACCAGGAGAGATGCGGGCTCAGGGGCCGCTCTCAGGTAGATCGGAAGAGCGGTTTCAG      |
| chr19 | 1621201  | 1621240  | TCF3_6909   | + | GTGACCTATGCACCAGACGTAGAGAGGTGAGGCCACCGCCAGCCGCTGGGTGCTGCCGAGATCGGAAGAGCGGTTTCAG      |
| chr19 | 1621980  | 1622019  | TCF3_6910   | + | GTGACCTATGCACCAGACGTAGGCAAGGAGGGTGGGTTAGATGGGACTGCCACCCTCAGATCGGAAGAGCGGTTTCAG       |
| chr19 | 1622233  | 1622272  | TCF3_6911   | + | GTGACCTATGCACCAGACGTGAGCTGGTAAGTGGGGGCCGAGTGGGGAACCCAGCCCTAGATCGGAAGAGCGGTTTCAG      |
| chr19 | 1622425  | 1622464  | TCF3_6912   | + | GTGACCTATGCACCAGACGTGTGGGCGGTGGGGGGTGCAGTCAAGACGGAGGGACCACGAAGATCGGAAGAGCGGTTTCAG    |
| chr19 | 1624010  | 1624049  | TCF3_6913   | + | GTGACCTATGCACCAGACGTCAAAGGGGTGAGAACCAGCCACCGGCCATGAGAACAACCCAGATCGGAAGAGCGGTTTCAG    |
| chr19 | 1625718  | 1625757  | TCF3_6914   | + | GTGACCTATGCACCAGACGTGCGGATGGTCAGAAAGCCAGCTGCCATCCAGACCCCAAGATCGGAAGAGCGGTTTCAG       |
| chr19 | 1627436  | 1627475  | TCF3_6915   | + | GTGACCTATGCACCAGACGTAGAAGGAAGTTAGTGGGAGGCCAGCCCAAGGAACATCCTAGATCGGAAGAGCGGTTTCAG     |
| chr19 | 1632126  | 1632165  | TCF3_6916   | + | GTGACCTATGCACCAGACGTTGGGGTGGGGATGAGAGGTGCTGGGGCTTACAGGCCCCAGATCGGAAGAGCGGTTTCAG      |
| chr19 | 1632415  | 1632454  | TCF3_6917   | + | GTGACCTATGCACCAGACGTGACAGAGAGTATGGGTCAACCCTCACGCCTGCCAGCTAGATCGGAAGAGCGGTTTCAG       |
| chr19 | 1646437  | 1646476  | TCF3_6918   | + | GTGACCTATGCACCAGACGTGGGAGGGGAGACGTGAGCCGGGGCGGGTGGCAAACCAACCCAGATCGGAAGAGCGGTTTCAG   |
| chr19 | 1650258  | 1650297  | TCF3_6919   | + | GTGACCTATGCACCAGACGTCCAGGGCGCCACCTCAGGCCCTGGAAACCCCTGCTTGGTGGAGATCGGAAGAGCGGTTTCAG   |
| chr3  | 41265622 | 41265622 | CTNNB1_6920 | + | GTGACCTATGCACCAGACGTTAAATCTTTAGTTACTGAATGGGGCTCGCTTTCGTTGCAGATCGGAAGAGCGGTTTCAG      |
| chr3  | 41266255 | 41266294 | CTNNB1_6921 | + | GTGACCTATGCACCAGACGTTATTTTTTTCATTGCCTTACTGAAAGTCAGAAATGCAGTTTTGAGATCGGAAGAGCGGTTTCAG |
| chr3  | 41266709 | 41266748 | CTNNB1_6922 | + | GTGACCTATGCACCAGACGTACATAGCTAGCTTTTTAGTCTGCTTTGAGTAAATGCTCAAGATCGGAAGAGCGGTTTCAG     |
| chr3  | 41267074 | 41267113 | CTNNB1_6923 | + | GTGACCTATGCACCAGACGTATGTCAGAAATGCTTGAAGCTAAAAGTAGAAGAGTATACTAGATCGGAAGAGCGGTTTCAG    |
| chr3  | 41267363 | 41267402 | CTNNB1_6924 | + | GTGACCTATGCACCAGACGTTATTTCTTTATGTGGTTTTTTCATGGAGCATTGGACACCTCCAAGATCGGAAGAGCGGTTTCAG |
| chr3  | 41268854 | 41268893 | CTNNB1_6925 | + | GTGACCTATGCACCAGACGTGTATCTATTCTGAGTCTTGTGTATAGCATCTGCAGTTCTAAGATCGGAAGAGCGGTTTCAG    |
| chr3  | 41274946 | 41274985 | CTNNB1_6926 | + | GTGACCTATGCACCAGACGTAGTAACTGGTGGCAATGAAAGTCAAGATGAGATCGGAAGAGCGGTTTCAG               |
| chr3  | 41275369 | 41275408 | CTNNB1_6927 | + | GTGACCTATGCACCAGACGTAAAGTAGAATTTACCTTTGTTGCAGAATGAAAATGAAGCAGATCGGAAGAGCGGTTTCAG     |
| chr3  | 41275799 | 41275838 | CTNNB1_6928 | + | GTGACCTATGCACCAGACGTTCTTACAGTGATACCTGGCTATCTAAAAGGAATGCATAAAAGATCGGAAGAGCGGTTTCAG    |
| chr3  | 41277345 | 41277384 | CTNNB1_6929 | + | GTGACCTATGCACCAGACGTAGTGAAGTGTTCAGGTTTTATGTCATAAAATTTCCAGAAGATCGGAAGAGCGGTTTCAG      |
| chr3  | 41278001 | 41278040 | CTNNB1_6930 | + | GTGACCTATGCACCAGACGTAGGAACCAAGCTTTAGCAGATGTGTACATTGAAGTCTCAGATCGGAAGAGCGGTTTCAG      |
| chr3  | 41278211 | 41278250 | CTNNB1_6931 | + | GTGACCTATGCACCAGACGTGTGAGCAGTATTTATCTCGGTAGTTTCCCTAGACAGGTATAGATCGGAAGAGCGGTTTCAG    |
| chr3  | 41279578 | 41279617 | CTNNB1_6932 | + | GTGACCTATGCACCAGACGTATATTTCTCGATTAACCTCAGATCAAGATCAAAAGTTCTAAAAGATCGGAAGAGCGGTTTCAG  |
| chr3  | 41280844 | 41280883 | CTNNB1_6933 | + | GTGACCTATGCACCAGACGTAGGTAAGAAGTTTTAAAAGCCAGTTTGGGTAATAACTTAGATCGGAAGAGCGGTTTCAG      |
| chr8  | 38271333 | 38271372 | FGFR1_6934  | + | GTGACCTATGCACCAGACGTGAGAGGAAGCAGCGATGGGCCGGGCCCTCCTCCCTGCTAGATCGGAAGAGCGGTTTCAG      |
| chr8  | 38271552 | 38271591 | FGFR1_6935  | + | GTGACCTATGCACCAGACGTACTGTAAGGTCAGGGACGTCTCCCTGGAGATGGATACTCTCAGATCGGAAGAGCGGTTTCAG   |
| chr8  | 38271818 | 38271857 | FGFR1_6936  | + | GTGACCTATGCACCAGACGTGCCGAGAGCCAGGGTGTAGAGCTTCCCGCTCCCTAGATCGGAAGAGCGGTTTCAG          |
| chr8  | 38272158 | 38272197 | FGFR1_6937  | + | GTGACCTATGCACCAGACGTCAACGGAAGCAAAATGGACAGCACAGGCATGAGACCTCAGATCGGAAGAGCGGTTTCAG      |
| chr8  | 38273589 | 38273628 | FGFR1_6938  | + | GTGACCTATGCACCAGACGTAGGAGAAGAGGCCATGGGGCCAGCAGCAGGTGAGCAGGTTAGATCGGAAGAGCGGTTTCAG    |
| chr8  | 38274945 | 38274984 | FGFR1_6939  | + | GTGACCTATGCACCAGACGTACGTTGAGACTCATTTACTTGGGAAGGGAGGAGGGCAGGAGATCGGAAGAGCGGTTTCAG     |
| chr8  | 38275520 | 38275559 | FGFR1_6940  | + | GTGACCTATGCACCAGACGTAAACAGAGAGTGGCATAAGTTGGGGCTGGTGAAGTTCAAAGATCGGAAGAGCGGTTTCAG     |
| chr8  | 38275902 | 38275941 | FGFR1_6941  | + | GTGACCTATGCACCAGACGTGAGTGGGGTCAACCCTAGAGCAAGGAGGGGGGACCGGGTGAAGATCGGAAGAGCGGTTTCAG   |
| chr8  | 38277264 | 38277303 | FGFR1_6942  | + | GTGACCTATGCACCAGACGTGCGAACAGGGTGTAGCAGCCTTGGAGGCCCCGTCCATGAGATCGGAAGAGCGGTTTCAG      |
| chr8  | 38279470 | 38279509 | FGFR1_6943  | + | GTGACCTATGCACCAGACGTCAACGGAAGCAAAATGGACAGCACAGGCACATGAGACCTCAGATCGGAAGAGCGGTTTCAG    |
| chr8  | 38282228 | 38282267 | FGFR1_6944  | + | GTGACCTATGCACCAGACGTTGGGAGAGGAGGCACTTGTTCATGGGGACCTTGGCATGGCTAGATCGGAAGAGCGGTTTCAG   |
| chr8  | 38283774 | 38283813 | FGFR1_6945  | + | GTGACCTATGCACCAGACGTATGCCAAAGGATACATTGAGGGTCCAGAGGAAAATGCAGAGATCGGAAGAGCGGTTTCAG     |
| chr8  | 38285622 | 38285661 | FGFR1_6946  | + | GTGACCTATGCACCAGACGTAAAGCCAAGAGAGAGAGCCAGGGTGGAGAGGAGCAGCTGGAGATCGGAAGAGCGGTTTCAG    |
| chr8  | 38285964 | 38286003 | FGFR1_6947  | + | GTGACCTATGCACCAGACGTAAAGAAAGGGGCACTGAGGTTCTCTCAGGGACCCCTAGATTAGATCGGAAGAGCGGTTTCAG   |
| chr8  | 38314975 | 38315014 | FGFR1_6948  | + | GTGACCTATGCACCAGACGTGAGTTAGAGTGTGTGACAAAGTCCACATCTCCATGGATCGGAAGAGCGGTTTCAG          |
| chrX  | 15364392 | 15364431 | FIGF_6949   | + | GTGACCTATGCACCAGACGTAGAAAATAAAGATGAGAATTCAGAATCAATGACTGGATTGAGATCGGAAGAGCGGTTTCAG    |
| chrX  | 15365492 | 15365531 | FIGF_6950   | + | GTGACCTATGCACCAGACGTACAGAAACGTGTTGGTCAGATAGTTGTAGTGTGGCAATTGAGATCGGAAGAGCGGTTTCAG    |
| chrX  | 15371301 | 15371340 | FIGF_6951   | + | GTGACCTATGCACCAGACGTAAAACAATGAACCAGATTAAAAGCTTTCAAGGATAATCAAGATCGGAAGAGCGGTTTCAG     |
| chrX  | 15376326 | 15376365 | FIGF_6952   | + | GTGACCTATGCACCAGACGTAAAGAAAGCTCACTGGGGCTAGCAGGTGGAATGGTCTGGAGATCGGAAGAGCGGTTTCAG     |
| chrX  | 15381452 | 15381491 | FIGF_6953   | + | GTGACCTATGCACCAGACGTCAAAAATACCAGTTGAAAACAAGTTACTAAAATTTAAATAGATCGGAAGAGCGGTTTCAG     |
| chrX  | 15402079 | 15402118 | FIGF_6954   | + | GTGACCTATGCACCAGACGTTCAATATCCACTGATTACTAAAGCAGTTGACATCAGGCAGCAGATCGGAAGAGCGGTTTCAG   |
| chr11 | 532766   | 532805   | HRAS_6955   | + | GTGACCTATGCACCAGACGTAGGGATGGGATCAGGAGGGACCCGGCCTGTGGCCGCTGCCAGATCGGAAGAGCGGTTTCAG    |
| chr11 | 533369   | 533408   | HRAS_6956   | + | GTGACCTATGCACCAGACGTGGAGAGGGTCAGTGAAGTGTGCTGCTCCCTGGCTGGGGCGGGGAGATCGGAAGAGCGGTTTCAG |
| chr11 | 533623   | 533662   | HRAS_6957   | + | GTGACCTATGCACCAGACGTGAAAGCGAGAGCTGGCTACGGGGGCTGCAGGCACCGGCAGATCGGAAGAGCGGTTTCAG      |
| chr11 | 533955   | 533994   | HRAS_6958   | + | GTGACCTATGCACCAGACGTACAGGGCTCAGGGACCCCTCAGGACCTTCCGTGGGGGGAAGATCGGAAGAGCGGTTTCAG     |
| chr11 | 534333   | 534372   | HRAS_6959   | + | GTGACCTATGCACCAGACGTGGGCTGGCCCGCCGCTCCCTCAGGGTCTCCTGCCAGATCGGAAGAGCGGTTTCAG          |
| chr15 | 88420362 | 88420401 | NTRK3_6960  | + | GTGACCTATGCACCAGACGTGAGAAGAACAGGATTAACCCAAAGCTCAGCCTTGGTATCGGAAGAGCGGTTTCAG          |



|       |           |           |            |   |                                                                                       |
|-------|-----------|-----------|------------|---|---------------------------------------------------------------------------------------|
| chr15 | 88423670  | 88423709  | NTRK3_6961 | + | GTGACCTATGCACCAGACGTTTGAGATAGAGGCCACACAGAGTGACCAGATGCCAGAAATGAGATCGGAAGAGCGGTTTCAG    |
| chr15 | 88472676  | 88472715  | NTRK3_6962 | + | GTGACCTATGCACCAGACGTTGGGGAGAAGAGAGGGGGCAGAGAGAAATCAGGAGATCAAGATCGGAAGAGCGGTTTCAG      |
| chr15 | 88476426  | 88476465  | NTRK3_6963 | + | GTGACCTATGCACCAGACGTTGCAGGACACAGGTGTTTAAACAACACAGGGCAGGGGGCTAGATCGGAAGAGCGGTTTCAG     |
| chr15 | 88483995  | 88484034  | NTRK3_6964 | + | GTGACCTATGCACCAGACGTTGGGACAAGAGAGGGGCAGCAAATCAGTCTCGTTTGGTGAGATCGGAAGAGCGGTTTCAG      |
| chr15 | 88524602  | 88524641  | NTRK3_6965 | + | GTGACCTATGCACCAGACGTAGGCAGACATGGGGGAATTAATGGTCAGTATTAACCCCAAGATCGGAAGAGCGGTTTCAG      |
| chr15 | 88576287  | 88576326  | NTRK3_6966 | + | GTGACCTATGCACCAGACGTCAAGAGAGACAGGACCTGGTGACGTACATCCGGCCAGAGATCGGAAGAGCGGTTTCAG        |
| chr15 | 88669615  | 88669654  | NTRK3_6967 | + | GTGACCTATGCACCAGACGTGACAAACAGAGAGTACGAAACAATCACAGAAAACCCAATAGATCGGAAGAGCGGTTTCAG      |
| chr15 | 88670468  | 88670507  | NTRK3_6968 | + | GTGACCTATGCACCAGACGTAACACAAAAAGGAGGAGGACAGTTAGCTTCCCAGGCTGGGGAGATCGGAAGAGCGGTTTCAG    |
| chr15 | 88671976  | 88672015  | NTRK3_6969 | + | GTGACCTATGCACCAGACGTAGGACAAAGAGATAATTAACAAATTTAATAAAAACCAAGATCGGAAGAGCGGTTTCAG        |
| chr15 | 88678639  | 88678678  | NTRK3_6970 | + | GTGACCTATGCACCAGACGTAGAAACCTGCTGAAATCCAGGACACAGAGTCTACCACCTCAGATCGGAAGAGCGGTTTCAG     |
| chr15 | 88679282  | 88679321  | NTRK3_6971 | + | GTGACCTATGCACCAGACGTCAATAAAAAAGATAACAAATCAGATAGCTTCTACAAGGATGGAGATCGGAAGAGCGGTTTCAG   |
| chr15 | 88679851  | 88679890  | NTRK3_6972 | + | GTGACCTATGCACCAGACGTGACAAAGTGGGTGAAAAGACAGGCCAAACCTTACTACCCAAAGATCGGAAGAGCGGTTTCAG    |
| chr15 | 88680803  | 88680842  | NTRK3_6973 | + | GTGACCTATGCACCAGACGTAGAGAGAGGGGAAAGGGAACCTCTGAACCCGAAGATGCCCAAGATCGGAAGAGCGGTTTCAG    |
| chr15 | 88690645  | 88690684  | NTRK3_6974 | + | GTGACCTATGCACCAGACGTGACAAATAAGGGAAATTTTAAACAAGTCTGGCACAAATAGATCGGAAGAGCGGTTTCAG       |
| chr15 | 88726731  | 88726770  | NTRK3_6975 | + | GTGACCTATGCACCAGACGTAGAAAAAGAGGATCAGCAGAGCTCAAGTGGCAGAGGGGATAAGATCGGAAGAGCGGTTTCAG    |
| chr11 | 32410736  | 32410775  | WT1_6976   | + | GTGACCTATGCACCAGACGTAATTTGCCAGTCAGACACTTGCAACAAGAGACAGGCACAGATCGGAAGAGCGGTTTCAG       |
| chr11 | 32413621  | 32413660  | WT1_6977   | + | GTGACCTATGCACCAGACGTAGAAAGAGGTCTAGCCTCGGCCCTAAACATGTGGCCACAGTAGATCGGAAGAGCGGTTTCAG    |
| chr11 | 32414312  | 32414351  | WT1_6978   | + | GTGACCTATGCACCAGACGTACACATATTTCTTAAATGATACTGTGAAAAGGGGATCAGATCGGAAGAGCGGTTTCAG        |
| chr11 | 32417964  | 32418003  | WT1_6979   | + | GTGACCTATGCACCAGACGTAGAGTAAGAGGAAGGGAGGCTTTAAGCCACATGTGAACATAGATCGGAAGAGCGGTTTCAG     |
| chr11 | 32421601  | 32421640  | WT1_6980   | + | GTGACCTATGCACCAGACGTAAGAAGGGAAAAAGGCTCAGTGTGGCTCACAGTCGCCATAGATCGGAAGAGCGGTTTCAG      |
| chr11 | 32438097  | 32438136  | WT1_6981   | + | GTGACCTATGCACCAGACGTAGAAAGAGGTGGGGAGTGGGGAATGGAGCATGCATGGATCTAGATCGGAAGAGCGGTTTCAG    |
| chr11 | 32439211  | 32439250  | WT1_6982   | + | GTGACCTATGCACCAGACGTAACATCTAGAGTTAGAAACATAACCCAAAAATAACAAGATCGGAAGAGCGGTTTCAG         |
| chr11 | 32449615  | 32449654  | WT1_6983   | + | GTGACCTATGCACCAGACGTAACCGAAGACGCTGACGAGTGCGCCCCAAAGGCTCGGGAGATCGGAAGAGCGGTTTCAG       |
| chr11 | 32450176  | 32450215  | WT1_6984   | + | GTGACCTATGCACCAGACGTAGCGGAGAGAGGAGCGAGTGCACGCTGCTCTCCGAAGACAGATCGGAAGAGCGGTTTCAG      |
| chr11 | 32456902  | 32456941  | WT1_6985   | + | GTGACCTATGCACCAGACGTTCCAGGATCGCGGCGAGGAGACGGCGGGGCCCGGCCCTAGATCGGAAGAGCGGTTTCAG       |
| chr11 | 32456579  | 32456618  | WT1_6986   | + | GTGACCTATGCACCAGACGTCCGGCGCCCACTGCGCCGCGCCGCTCACAGGCAGGGCACAAAGATCGGAAGAGCGGTTTCAG    |
| chr1  | 22405087  | 22405126  | CDC42_6987 | + | GTGACCTATGCACCAGACGTAGGCTTCTCTGTAGTAAATGTTGTAATTTTGATATAGATCGGAAGAGCGGTTTCAG          |
| chr1  | 22408298  | 22408337  | CDC42_6988 | + | GTGACCTATGCACCAGACGTAATGCTTTTTATACTGTTTTGATCTTTAACAGTTGCTAGTAGATCGGAAGAGCGGTTTCAG     |
| chr1  | 22413052  | 22413091  | CDC42_6989 | + | GTGACCTATGCACCAGACGTAGATCTTCCCTAAGAAGATCATCTCAGAATTTAAGATCGGAAGAGCGGTTTCAG            |
| chr1  | 22413370  | 22413409  | CDC42_6990 | + | GTGACCTATGCACCAGACGTCATGAAACCCCATGTGTATTATTTAGTCTCAGTCAATTTAAGATCGGAAGAGCGGTTTCAG     |
| chr1  | 22416536  | 22416575  | CDC42_6991 | + | GTGACCTATGCACCAGACGTCCTTCCCTTCTTTGCTGCTGCTTCTGTCCTTCTGTCCTTCTGTAAGATCGGAAGAGCGGTTTCAG |
| chr1  | 22418021  | 22418060  | CDC42_6992 | + | GTGACCTATGCACCAGACGTAGAGCCCTTCTGTCACAGCTGGTGTGGCCTCATACTAAAAGATCGGAAGAGCGGTTTCAG      |
| chr8  | 118812147 | 118812186 | EXT1_6993  | + | GTGACCTATGCACCAGACGTGGAGAGAAACAAGGATAATGATGAGAGAAAGTGAAGGTGAAGATCGGAAGAGCGGTTTCAG     |
| chr8  | 118817143 | 118817182 | EXT1_6994  | + | GTGACCTATGCACCAGACGTCAAAAGTGGGTTTTCACAGGGGGCCATTATCACATGATGACAGATCGGAAGAGCGGTTTCAG    |
| chr8  | 118819627 | 118819666 | EXT1_6995  | + | GTGACCTATGCACCAGACGTAACCAACAAGCCAAACGAAAGTGTAAACAATGTAGATCGGAAGAGCGGTTTCAG            |
| chr8  | 118825211 | 118825250 | EXT1_6996  | + | GTGACCTATGCACCAGACGTGTAAGAGTAGGACGTTGGGAGGGAATGAGGGAAAGAGGTAAGATCGGAAGAGCGGTTTCAG     |
| chr8  | 118830780 | 118830819 | EXT1_6997  | + | GTGACCTATGCACCAGACGTTGGGCTCATTAGATGGCTGGGGTAGGATGTATTTATGAAGATCGGAAGAGCGGTTTCAG       |
| chr8  | 118832044 | 118832083 | EXT1_6998  | + | GTGACCTATGCACCAGACGTAAGGAGAGTAGAGCCCTAATGAAGCGCTGGAAGCAAGACTAGATCGGAAGAGCGGTTTCAG     |
| chr8  | 118834847 | 118834886 | EXT1_6999  | + | GTGACCTATGCACCAGACGTAACATAGCACACAGTGAAGGATGAGATCCTGATGATATTTAGATCGGAAGAGCGGTTTCAG     |
| chr8  | 118842599 | 118842638 | EXT1_7000  | + | GTGACCTATGCACCAGACGTAGGTGAACACATAGGAATATAACTGTAAAAACAAGAGATAGATCGGAAGAGCGGTTTCAG      |
| chr8  | 118847801 | 118847840 | EXT1_7001  | + | GTGACCTATGCACCAGACGTAAGGGGACTTCTGTAATGTGAGAAAGCGACAGACAGATCGGAAGAGCGGTTTCAG           |
| chr8  | 118849451 | 118849490 | EXT1_7002  | + | GTGACCTATGCACCAGACGTAAGAGGAGTAAACAGCAAATGAAGACTCATTGCGAATGTGAGATCGGAAGAGCGGTTTCAG     |
| chr8  | 119123296 | 119123335 | EXT1_7003  | + | GTGACCTATGCACCAGACGTTGGGTCAAGAGGATTGTAATAAACACAAGAATCACCCAAAGATCGGAAGAGCGGTTTCAG      |
| chr8  | 119122815 | 119122854 | EXT1_7004  | + | GTGACCTATGCACCAGACGTACTCAGGACAAAGAGGCACGCTGGCTGGGGTCCGAGGTGAGATCGGAAGAGCGGTTTCAG      |
| chr6  | 108883043 | 108883082 | FOXO3_7005 | + | GTGACCTATGCACCAGACGTAACCCGGGCTGGCAGCAGGACCCCGGGCCTCCGCGCAAGATCGGAAGAGCGGTTTCAG        |
| chr6  | 108986069 | 108986108 | FOXO3_7006 | + | GTGACCTATGCACCAGACGTAGGAAAGGGGAAGTGGGCAAGAGCGTCAAGTCCGGAATGCTAGATCGGAAGAGCGGTTTCAG    |
| chr6  | 108882732 | 108882771 | FOXO3_7007 | + | GTGACCTATGCACCAGACGTCCCCGGGTCTGGGCCAGCCACCAGCCGGCGGGCGGGCTGAGCAGATCGGAAGAGCGGTTTCAG   |
| chr6  | 108985135 | 108985174 | FOXO3_7008 | + | GTGACCTATGCACCAGACGTTCCACGGCTGACTGATATGGCAGGCACCATGAATCTGAATGAGATCGGAAGAGCGGTTTCAG    |
| chr6  | 108985602 | 108985641 | FOXO3_7009 | + | GTGACCTATGCACCAGACGTGCCAACCAGGGAAGTTTGGTCAATCAGAACTTCTCCACAGATCGGAAGAGCGGTTTCAG       |
| chr1  | 204499956 | 204499995 | MDM4_7010  | + | GTGACCTATGCACCAGACGTTGATGGGCTTGCATCTTTTTGGTGGCTTATACCTAACCAAGATCGGAAGAGCGGTTTCAG      |
| chr1  | 204501385 | 204501424 | MDM4_7011  | + | GTGACCTATGCACCAGACGTTTCATTTCTCAGTCTGATCACAGCTTTGAGTTCAAGGAGATCGGAAGAGCGGTTTCAG        |
| chr1  | 204506636 | 204506675 | MDM4_7012  | + | GTGACCTATGCACCAGACGTCACAGCGTGATCTCTTTTGTGTTACAGATGGCCCTTCTAGATCGGAAGAGCGGTTTCAG       |
| chr1  | 204507447 | 204507486 | MDM4_7013  | + | GTGACCTATGCACCAGACGTGATTAAGGCTATATAGACTTTTTGTTCTTCTTCTTCCAAAGATCGGAAGAGCGGTTTCAG      |
| chr1  | 204512083 | 204512122 | MDM4_7014  | + | GTGACCTATGCACCAGACGTCATTTGAAGGGAAGTGGTTTTTTTTCTTTTGAAGGGTAAAGATCGGAAGAGCGGTTTCAG      |
| chr1  | 204513823 | 204513862 | MDM4_7015  | + | GTGACCTATGCACCAGACGTGAAAAATCCATGTTGATTCTGTTGTGTGCTCATAGTATAGATCGGAAGAGCGGTTTCAG       |
| chr1  | 204516016 | 204516055 | MDM4_7016  | + | GTGACCTATGCACCAGACGTTTAGCAAGAACTTTTGCACCAGCCCATCTTCAGATGAAGATCGGAAGAGCGGTTTCAG        |
| chr1  | 204518821 | 204518860 | MDM4_7017  | + | GTGACCTATGCACCAGACGTAACATAAAAAATCATTTTTCCGTTTCACTTACCACATATAGATCGGAAGAGCGGTTTCAG      |
| chr1  | 204518536 | 204518575 | MDM4_7018  | + | GTGACCTATGCACCAGACGTTCTGAAAAGCCAAAGACCATCTCAAGCATGGGAGAACAAGATCGGAAGAGCGGTTTCAG       |

|       |          |          |            |   |                                                                                      |
|-------|----------|----------|------------|---|--------------------------------------------------------------------------------------|
| chr7  | 538222   | 538261   | PDGFA_7019 | + | GTGACCTATGCACCAGACGTAAGGGAAAGACAGACACTGAGACCACCGACCAAGTGAACCAGATCGGAAGAGCGGTTTCAG    |
| chr7  | 540147   | 540186   | PDGFA_7020 | + | GTGACCTATGCACCAGACGTAAGGGCAGGGCCGTGAGTGGGCCGAGGGACGGCCGTCGGGAGATCGGAAGAGCGGTTTCAG    |
| chr7  | 540890   | 540929   | PDGFA_7021 | + | GTGACCTATGCACCAGACGTAACAGAGCCCGCCATGAATGCCTGCATGGAGCTTCGGAAGATCGGAAGAGCGGTTTCAG      |
| chr7  | 550644   | 550683   | PDGFA_7022 | + | GTGACCTATGCACCAGACGTGGGGGCACAGTGAGCGGGGACCGCCCTCTGCGACCACGGCAGATCGGAAGAGCGGTTTCAG    |
| chr7  | 552103   | 552142   | PDGFA_7023 | + | GTGACCTATGCACCAGACGTAAGGAGAACCCTGTAATGCCCCAGCCCGTGCCTGTGCAGATCGGAAGAGCGGTTTCAG       |
| chr7  | 558649   | 558688   | PDGFA_7024 | + | GTGACCTATGCACCAGACGTGGCGCTGGCTGCTCGGAGGAGAGCGGCGGGCGGGAGATCGGAAGAGCGGTTTCAG          |
| chr7  | 6013184  | 6013223  | PMS2_7025  | + | GTGACCTATGCACCAGACGTGACACCAATGGTTCACCGTTTTAGTACTTTTTGACGTCAGAGATCGGAAGAGCGGTTTCAG    |
| chr7  | 6017439  | 6017438  | PMS2_7026  | + | GTGACCTATGCACCAGACGTACAAATTTTTGAGAAAAATCCATGACTTGACAAAACGTTTTTCAGATCGGAAGAGCGGTTTCAG |
| chr7  | 6018338  | 6018377  | PMS2_7027  | + | GTGACCTATGCACCAGACGTCAAAAATGATTCACAAACCATATCCTGAAGTCAAACATTTAGAGATCGGAAGAGCGGTTTCAG  |
| chr7  | 6022633  | 6022672  | PMS2_7028  | + | GTGACCTATGCACCAGACGTAAAATGTTAATTATCAGACATTTTACAAGATTATTTTTCTAGATCGGAAGAGCGGTTTCAG    |
| chr7  | 6027262  | 6027301  | PMS2_7029  | + | GTGACCTATGCACCAGACGTGTGGACCGGAGAGAGGGTCAGGGACTATCCTGAAATGGTGAGATCGGAAGAGCGGTTTCAG    |
| chr7  | 6031699  | 6031738  | PMS2_7030  | + | GTGACCTATGCACCAGACGTTACAAGGAGTAGAAAAGATAAATGACAAATGTTCCAGCAGATCGGAAGAGCGGTTTCAG      |
| chr7  | 6035275  | 6035314  | PMS2_7031  | + | GTGACCTATGCACCAGACGTTTAAATGTTAAGGGCAGGATTCAGAGTGAAAGGGATTAGATCGGAAGAGCGGTTTCAG       |
| chr7  | 6037065  | 6037104  | PMS2_7032  | + | GTGACCTATGCACCAGACGTAAAAAAAATTACAGTTACTTCTAATAAAGACAGAGTAGATCGGAAGAGCGGTTTCAG        |
| chr7  | 6038917  | 6038956  | PMS2_7033  | + | GTGACCTATGCACCAGACGTAAACAAAAACAATATCTACATTACTTTAATATATAGGAGATCGGAAGAGCGGTTTCAG       |
| chr7  | 6042278  | 6042317  | PMS2_7034  | + | GTGACCTATGCACCAGACGTATACCAGCATGGTGTGTTCAGTGAGAGACCCATGATGTTAGATCGGAAGAGCGGTTTCAG     |
| chr7  | 6043473  | 6043473  | PMS2_7035  | + | GTGACCTATGCACCAGACGTGTAAAGTAAGGACTAAGATATCTCAAGTGTCTATAACAAAGATCGGAAGAGCGGTTTCAG     |
| chr7  | 6045673  | 6045712  | PMS2_7036  | + | GTGACCTATGCACCAGACGTCAGTTTAAAGAAAACAATCAAGTATTCAGCTATATATTTAGATCGGAAGAGCGGTTTCAG     |
| chr7  | 6048661  | 6048700  | PMS2_7037  | + | GTGACCTATGCACCAGACGTCCCAGTCCGCCTCGGGGACTGGGAAAGTTCCTCCAGGGCAGATCGGAAGAGCGGTTTCAG     |
| chr7  | 6026831  | 6026870  | PMS2_7038  | + | GTGACCTATGCACCAGACGTCTGGCCGATACTCGTGTGCTGCACTGACTGCCCGTGTCTGAGATCGGAAGAGCGGTTTCAG    |
| chr21 | 36164918 | 36164957 | RUNX1_7039 | + | GTGACCTATGCACCAGACGTGGCAAGAGAACGGAGCGGAAGTGAGTAGGAGGTTGCGGAGAGATCGGAAGAGCGGTTTCAG    |
| chr21 | 36171770 | 36171809 | RUNX1_7040 | + | GTGACCTATGCACCAGACGTTCAAAAAGTCAATTATATGTAAGTGGGGTGGGATTTAAAGATCGGAAGAGCGGTTTCAG      |
| chr21 | 36194004 | 36194043 | RUNX1_7041 | + | GTGACCTATGCACCAGACGTGATGTGACCAGGGGAAAAGTTCGAAAATAAGGACAATTAGATCGGAAGAGCGGTTTCAG      |
| chr21 | 36231886 | 36231925 | RUNX1_7042 | + | GTGACCTATGCACCAGACGTACGTATGGTAAGAACAAAACAGAAATGAGTTGGTGGCTGAACAGATCGGAAGAGCGGTTTCAG  |
| chr21 | 36253021 | 36253060 | RUNX1_7043 | + | GTGACCTATGCACCAGACGTGTCAAAGGACAAAATGCAGACATCAGGGATGTTATACATACAGATCGGAAGAGCGGTTTCAG   |
| chr21 | 36259404 | 36259443 | RUNX1_7044 | + | GTGACCTATGCACCAGACGTACGCATCACAACAAGCCGATTGAGTTAGGACCTGCAACAGATCGGAAGAGCGGTTTCAG      |
| chr21 | 36259420 | 36259459 | RUNX1_7045 | + | GTGACCTATGCACCAGACGTGATTTAGTTAGTACCCTGCAAAACAGCTCCTACCAGACGGAGATCGGAAGAGCGGTTTCAG    |
| chr21 | 36265271 | 36265310 | RUNX1_7046 | + | GTGACCTATGCACCAGACGTAGAAAAGTAGAAAATAAAGTAATGCAAGTTTAAAAATTAAGATCGGAAGAGCGGTTTCAG     |
| chr21 | 36421207 | 36421246 | RUNX1_7047 | + | GTGACCTATGCACCAGACGTTGAAAATGCACCCTCTTCTGAAGCGGGGACTCAATGATAGATCGGAAGAGCGGTTTCAG      |
| chr3  | 10183882 | 10183921 | VHL_7048   | + | GTGACCTATGCACCAGACGTGGCGCTTACGCCCTGAGCCGAGCAGCGATAGCACGGTCTAGATCGGAAGAGCGGTTTCAG     |
| chr3  | 10188331 | 10188370 | VHL_7049   | + | GTGACCTATGCACCAGACGTTTACTTTTTAAAAAGATAAGTTGTTGTGGTAAGTACAGAGATCGGAAGAGCGGTTTCAG      |
| chr3  | 10191660 | 10191699 | VHL_7050   | + | GTGACCTATGCACCAGACGTTGAAACTTACACTGTTTCATCTCAGCTTTTGATGGTACTGAGATCGGAAGAGCGGTTTCAG    |
| chr8  | 30916070 | 30916109 | WRN_7051   | + | GTGACCTATGCACCAGACGTCAATTGACTATTTCTTTGGGTGAGAAATTAATTTATATTTAGATCGGAAGAGCGGTTTCAG    |
| chr8  | 30916792 | 30916831 | WRN_7052   | + | GTGACCTATGCACCAGACGTTGAATTTCTGATTTATTTGAAATTTGGACCCTTAGAAGGAGATCGGAAGAGCGGTTTCAG     |
| chr8  | 30921961 | 30922000 | WRN_7053   | + | GTGACCTATGCACCAGACGTTCACTTACTTTTATTTATGTTGATGTAATTTGTAATATGTCAGATCGGAAGAGCGGTTTCAG   |
| chr8  | 30922590 | 30922629 | WRN_7054   | + | GTGACCTATGCACCAGACGTTATATATATAATTTTCATGATGAAGATTATTTTGTGTTACAGATCGGAAGAGCGGTTTCAG    |
| chr8  | 30924709 | 30924748 | WRN_7055   | + | GTGACCTATGCACCAGACGTAAGATCTTTAGAAATTTGATGTGTTTTAAAAACATTATAGATCGGAAGAGCGGTTTCAG      |
| chr8  | 30925854 | 30925893 | WRN_7056   | + | GTGACCTATGCACCAGACGTATCCATAAATAAAATGTGAATTCACCTTTTTGTGAGGTTTAGATCGGAAGAGCGGTTTCAG    |
| chr8  | 30933814 | 30933853 | WRN_7057   | + | GTGACCTATGCACCAGACGTACCTTTTTTTTTTAACTTAAATCAATCTGTTTATTTAGATCGGAAGAGCGGTTTCAG        |
| chr8  | 30941306 | 30941345 | WRN_7058   | + | GTGACCTATGCACCAGACGTAATATAAAAAATTAATCTCAAGTCTTTTCAAAGGACATAGATCGGAAGAGCGGTTTCAG      |
| chr8  | 30942773 | 30942812 | WRN_7059   | + | GTGACCTATGCACCAGACGTAATTATAAAAAACATTACTTCAAGTCTTTTCAAAGGACATAGATCGGAAGAGCGGTTTCAG    |
| chr8  | 30945447 | 30945486 | WRN_7060   | + | GTGACCTATGCACCAGACGTAAGTATGTTTTGAAATGACTCACCTGTGATACCTACCCTGAGATCGGAAGAGCGGTTTCAG    |
| chr8  | 30946492 | 30946531 | WRN_7061   | + | GTGACCTATGCACCAGACGTTCTCATTTAATCAAATCACATATTTAGTATCTCTTTAAAAGATCGGAAGAGCGGTTTCAG     |
| chr8  | 30948059 | 30948098 | WRN_7062   | + | GTGACCTATGCACCAGACGTTTAAAGCAAACCTAATCCTTTAAAAAATAAAAACATAAAAGATCGGAAGAGCGGTTTCAG     |
| chr8  | 30948469 | 30948508 | WRN_7063   | + | GTGACCTATGCACCAGACGTTTATCTTGGCACAATATCACCTCTTTTTTCTCTGTGAGATCGGAAGAGCGGTTTCAG        |
| chr8  | 30954377 | 30954416 | WRN_7064   | + | GTGACCTATGCACCAGACGTTAAGAAAGTCTCTGTAATACTTACTGATTAATATTAAAGATCGGAAGAGCGGTTTCAG       |
| chr8  | 30958482 | 30958521 | WRN_7065   | + | GTGACCTATGCACCAGACGTCAAAGTCTGATGTCCCGAAATTAATCTTAATAAAGGAGAAGATCGGAAGAGCGGTTTCAG     |
| chr8  | 30969326 | 30969365 | WRN_7066   | + | GTGACCTATGCACCAGACGTAATGGTGTGATGAAATTTGGTAAATGATTTCTTTTTTTTTTAGATCGGAAGAGCGGTTTCAG   |
| chr8  | 30974055 | 30974094 | WRN_7067   | + | GTGACCTATGCACCAGACGTCAATCATCATTTGCTCTCCGTTGCTCATAGTGAAGTGATAGATCGGAAGAGCGGTTTCAG     |
| chr8  | 30977951 | 30977990 | WRN_7068   | + | GTGACCTATGCACCAGACGTTTTATTGTTTTACTCTTGACAGATTTCTTTCTTTCCAGATCGGAAGAGCGGTTTCAG        |
| chr8  | 30982150 | 30982189 | WRN_7069   | + | GTGACCTATGCACCAGACGTTTATTTATGCCAATAGTATGGATTTATGGATGATCTCAGATCGGAAGAGCGGTTTCAG       |
| chr8  | 30982527 | 30982566 | WRN_7070   | + | GTGACCTATGCACCAGACGTTTATTTATAGATGGACATTCGTAAGAATCTTTCTTTCTTTCTTAGATCGGAAGAGCGGTTTCAG |
| chr8  | 30990033 | 30990072 | WRN_7071   | + | GTGACCTATGCACCAGACGTATCTGTGAATCCCTTCATAGATCTTCTTTTACTTCTATTAGATCGGAAGAGCGGTTTCAG     |
| chr8  | 30999127 | 30999166 | WRN_7072   | + | GTGACCTATGCACCAGACGTTAGGAGTCTGCCTGTTGACTTAAATTTGTTTCCCCTCCAGATCGGAAGAGCGGTTTCAG      |
| chr8  | 30999302 | 30999341 | WRN_7073   | + | GTGACCTATGCACCAGACGTCAAGTTTTTTTCTTTGAACTTCTGCATTTTTTTGTTGCTATTAGATCGGAAGAGCGGTTTCAG  |
| chr8  | 31000228 | 31000267 | WRN_7074   | + | GTGACCTATGCACCAGACGTAAGAAATTTGTTCTGATTTATTTCACTTTTATTGATTCAAAGATCGGAAGAGCGGTTTCAG    |
| chr8  | 31001150 | 31001189 | WRN_7075   | + | GTGACCTATGCACCAGACGTCTAATTTCTATTCTTACTTGTATAGACTTTTTAGATCGGAAGAGCGGTTTCAG            |
| chr8  | 31004655 | 31004694 | WRN_7076   | + | GTGACCTATGCACCAGACGTTGAAAAAGGTAATTAGTTTATGATAGGATGTTATGATTAGATCGGAAGAGCGGTTTCAG      |

|       |           |           |             |   |                                                                                      |
|-------|-----------|-----------|-------------|---|--------------------------------------------------------------------------------------|
| chr8  | 31005003  | 31005042  | WRN_7077    | + | GTGACCTATGCACCAGACGTTTTTTGCATGTGTTCTATTTATTTCCCTCTAACAAAAATAAGAATCGGAAGAGCGGTTTCAG   |
| chr8  | 31007982  | 31008021  | WRN_7078    | + | GTGACCTATGCACCAGACGTTGGTTTTGCAGGAGCTCTTAGAGAATAAGCATTTTTTGTAAAGATCGGAAGAGCGGTTTCAG   |
| chr8  | 31012282  | 31012321  | WRN_7079    | + | GTGACCTATGCACCAGACGTTTTCATGTTTACAGGGAATTTTTTTAGTTTACTTAAACTTAGATCGGAAGAGCGGTTTCAG    |
| chr8  | 31015057  | 31015096  | WRN_7080    | + | GTGACCTATGCACCAGACGTTGGCCTAGCTCTGCACCCTAATGACTTGATGAAGTAAACAGATCGGAAGAGCGGTTTCAG     |
| chr8  | 31024757  | 31024796  | WRN_7081    | + | GTGACCTATGCACCAGACGTTATATAGAATTTTCATAAAGTGCAGTGTGTTCAATTTGCAGATCGGAAGAGCGGTTTCAG     |
| chr8  | 31030629  | 31030668  | WRN_7082    | + | GTGACCTATGCACCAGACGTACCAACAATATGTTTCTTGCTGTATTATAAGAGGATAAGATCGGAAGAGCGGTTTCAG       |
| chr2  | 29419737  | 29419776  | ALK_7083    | + | GTGACCTATGCACCAGACGTTAATTAATAAATAAGGAGAAGCAACAATGATGAAAAGATCGGAAGAGCGGTTTCAG         |
| chr2  | 29430149  | 29430188  | ALK_7084    | + | GTGACCTATGCACCAGACGTTGGAGAGGAAAACAACTAGGATCTGGAGATGGCATTAAAGATCGGAAGAGCGGTTTCAG      |
| chr2  | 29432755  | 29432794  | ALK_7085    | + | GTGACCTATGCACCAGACGTAGGAAATGCATTTCTAATTTTTATCCCTAGGAAGATGAGTAGATCGGAAGAGCGGTTTCAG    |
| chr2  | 29436958  | 29436997  | ALK_7086    | + | GTGACCTATGCACCAGACGTACAGAAGCGGGCCACTGACGAGGAGCTTGTCACTGAGAGGAGATCGGAAGAGCGGTTTCAG    |
| chr2  | 29443712  | 29443751  | ALK_7087    | + | GTGACCTATGCACCAGACGTGAGAGGGATGTAACCAAAATTAAGTACTGAGCTGAGTCTGGGCAGATCGGAAGAGCGGTTTCAG |
| chr2  | 29445285  | 29445324  | ALK_7088    | + | GTGACCTATGCACCAGACGTAAGGGGAGGGTGGGGAGGAGGAGGCTGTGAGCTGAGAAGATCGGAAGAGCGGTTTCAG       |
| chr2  | 29445484  | 29445523  | ALK_7089    | + | GTGACCTATGCACCAGACGTGAGAAGACAAGAGGAGACAGAGTCAAACAGGCCACAATAAAGATCGGAAGAGCGGTTTCAG    |
| chr2  | 29446405  | 29446444  | ALK_7090    | + | GTGACCTATGCACCAGACGTGTTGTCAGCTGCAACATGGCCTGGCAGCCTGGCCCTTGAAAGATCGGAAGAGCGGTTTCAG    |
| chr2  | 29448442  | 29448481  | ALK_7091    | + | GTGACCTATGCACCAGACGTGGTCCCCTGGGGTATTGACAACCACACAGGTTCTCTTTAGATCGGAAGAGCGGTTTCAG      |
| chr2  | 29449951  | 29449990  | ALK_7092    | + | GTGACCTATGCACCAGACGTGGAGGGAGGGTAGCTTTGGGCCAGCCTGCCTCCCCACTAGATCGGAAGAGCGGTTTCAG      |
| chr2  | 29450549  | 29450588  | ALK_7093    | + | GTGACCTATGCACCAGACGTAAACAGACAGAGTTAATACGTGGGGGGTGGGTGCCAAAATAGATCGGAAGAGCGGTTTCAG    |
| chr2  | 29451943  | 29451982  | ALK_7094    | + | GTGACCTATGCACCAGACGTAGTAGGGCAACCTGCGTGAGGATCTGGCAAAGTTCAATTAGATCGGAAGAGCGGTTTCAG     |
| chr2  | 29455325  | 29455364  | ALK_7095    | + | GTGACCTATGCACCAGACGTGAGACATTCAGACATTGAGAAACCAGCTGTGCTTCCCCAGATCGGAAGAGCGGTTTCAG      |
| chr2  | 29456573  | 29456612  | ALK_7096    | + | GTGACCTATGCACCAGACGTAAAAAGCACGTTAGGTTTGTGGCCAAACCAGAGTTTCCAAAGATCGGAAGAGCGGTTTCAG    |
| chr2  | 29462707  | 29462746  | ALK_7097    | + | GTGACCTATGCACCAGACGTACAAGAAGCCTTGGCTCCCCTGTGTATGAAGACTGTCCAGATCGGAAGAGCGGTTTCAG      |
| chr2  | 29474144  | 29474183  | ALK_7098    | + | GTGACCTATGCACCAGACGTAGAGGAGAGGCAGTCACTCATGTGGCCAGGCCCTCCCTCCAGATCGGAAGAGCGGTTTCAG    |
| chr2  | 29498104  | 29498143  | ALK_7099    | + | GTGACCTATGCACCAGACGTGAAGACCCACGGGCTGAGTTAGGTGAGGGTTGATTTAGATCGGAAGAGCGGTTTCAG        |
| chr2  | 29498373  | 29498412  | ALK_7100    | + | GTGACCTATGCACCAGACGTGAGAAGGAATGTTGTGAGGAGCAAACCTGGGGGCTTGTGATCGGAAGAGCGGTTTCAG       |
| chr2  | 29519934  | 29519973  | ALK_7101    | + | GTGACCTATGCACCAGACGTGAGAAGAGTCAAGAGGACAAGGTATGATTGCTGAAAGGTCCAGATCGGAAGAGCGGTTTCAG   |
| chr2  | 29541281  | 29541320  | ALK_7102    | + | GTGACCTATGCACCAGACGTGGAAAAGAATCACAAAGCACGCCATTATCAGGAACCTGGGGGAGATCGGAAGAGCGGTTTCAG  |
| chr2  | 29543759  | 29543798  | ALK_7103    | + | GTGACCTATGCACCAGACGTAGCAGAGAGGCACCATCATTTTTCAGGACCACTAAAGGCCAAAGATCGGAAGAGCGGTTTCAG  |
| chr2  | 29551358  | 29551397  | ALK_7104    | + | GTGACCTATGCACCAGACGTACAGACACACACCAATGGTAAGTTTGCATGGCCCCAGGCAGATCGGAAGAGCGGTTTCAG     |
| chr2  | 29606736  | 29606775  | ALK_7105    | + | GTGACCTATGCACCAGACGTGGAAAACAGAGGAGAAACATAGAAACAGATGAGAGATCGGAAGAGCGGTTTCAG           |
| chr2  | 29754993  | 29755032  | ALK_7106    | + | GTGACCTATGCACCAGACGTACAGGGAAAACGAATCCAGATGTGTTCCAGGTAAGACCAAGATCGGAAGAGCGGTTTCAG     |
| chr2  | 29917891  | 29917930  | ALK_7107    | + | GTGACCTATGCACCAGACGTAGCCAAGGGTCAATGGAAAACCATTTCCAAACGTGACAGATCGGAAGAGCGGTTTCAG       |
| chr2  | 29940574  | 29940613  | ALK_7108    | + | GTGACCTATGCACCAGACGTAAATAAAGAAAACACTGATCCATGTGCTTGGGGTGTGTCTAGATCGGAAGAGCGGTTTCAG    |
| chr2  | 30143536  | 30143575  | ALK_7109    | + | GTGACCTATGCACCAGACGTGAGGGCCGTTTACACTGCTCTCCGGGCCAGCCCTCACCTTAGATCGGAAGAGCGGTTTCAG    |
| chr2  | 29416449  | 29416488  | ALK_7110    | + | GTGACCTATGCACCAGACGTAGCTGGTGGCTTGTTCCTGGATCCGTTGACCTTTGTGCAAAAGATCGGAAGAGCGGTTTCAG   |
| chr2  | 30143202  | 30143241  | ALK_7111    | + | GTGACCTATGCACCAGACGTGACCCCGGGCTGACCAGCAACTGAGCAGCGGGGCGAGATCGGAAGAGCGGTTTCAG         |
| chrX  | 66766615  | 66766654  | AR_7112     | + | GTGACCTATGCACCAGACGTCTTCCAGAAATGTCGCCCTTTCGGCCCAGGGCAGAGTACAGATCGGAAGAGCGGTTTCAG     |
| chrX  | 66788875  | 66788914  | AR_7113     | + | GTGACCTATGCACCAGACGTCTTCAATTGAAAACCTAGAAGTCAAGTTCTAGGGTAGTGAAGATCGGAAGAGCGGTTTCAG    |
| chrX  | 66863260  | 66863299  | AR_7114     | + | GTGACCTATGCACCAGACGTTTGCACATGCACCTCTCTTTCCCTTTCTCCTTTACCTTCCAGATCGGAAGAGCGGTTTCAG    |
| chrX  | 66937475  | 66937514  | AR_7115     | + | GTGACCTATGCACCAGACGTTCTGGGGCCAGACCTCACTAAATACAGCAGCTTGGCCAGAGATCGGAAGAGCGGTTTCAG     |
| chrX  | 66941816  | 66941855  | AR_7116     | + | GTGACCTATGCACCAGACGTAGAAGTGCAGGGAAATCCCCCCTGAGGCACAGAGATTCAGAGATCGGAAGAGCGGTTTCAG    |
| chrX  | 66942837  | 66942876  | AR_7117     | + | GTGACCTATGCACCAGACGTGATGGAGGCTTCTATACAGGGAGAACAAGCCTGATAGAGCAGATCGGAAGAGCGGTTTCAG    |
| chrX  | 66943694  | 66943733  | AR_7118     | + | GTGACCTATGCACCAGACGTACCCTATTTCCACCCACAGCTCATGCCCTTTCAGATGAGATCGGAAGAGCGGTTTCAG       |
| chrX  | 66765403  | 66765442  | AR_7119     | + | GTGACCTATGCACCAGACGTGTGGCCGCCAGCAAGGGGCTGCCGACAGCTGCCAGCACAGATCGGAAGAGCGGTTTCAG      |
| chrX  | 66765807  | 66765846  | AR_7120     | + | GTGACCTATGCACCAGACGTGGGAGTTCACCCCGCTGTGCGTCCCACCTTGTGCCCAAGATCGGAAGAGCGGTTTCAG       |
| chrX  | 66766211  | 66766250  | AR_7121     | + | GTGACCTATGCACCAGACGTTGGGACCTGGCGAGCCTGCATGCGCGGGTGCAGCGGGAGATCGGAAGAGCGGTTTCAG       |
| chr1  | 51436180  | 51436219  | CDKN2C_7122 | + | GTGACCTATGCACCAGACGTAGAGAGTGGGGAGCACTGATCAATAATGTTGCCATCGTGAGATCGGAAGAGCGGTTTCAG     |
| chr1  | 51439953  | 51439992  | CDKN2C_7123 | + | GTGACCTATGCACCAGACGTGGCTCCCCACGTTGCTCTACTTTATCAATTAAGTATGATCGGAAGAGCGGTTTCAG         |
| chr11 | 125496739 | 125496778 | CHEK1_7124  | + | GTGACCTATGCACCAGACGTTTAAGCTTGCCTTCTGTTTTCTGAGTGCATATTCATTGTTTAGATCGGAAGAGCGGTTTCAG   |
| chr11 | 125499202 | 125499241 | CHEK1_7125  | + | GTGACCTATGCACCAGACGTTTGTCTATTTCCCTTTACTTAAATTAGAGTGAATACATAGATCGGAAGAGCGGTTTCAG      |
| chr11 | 125503257 | 125503296 | CHEK1_7126  | + | GTGACCTATGCACCAGACGTTTAAATCATGGTAAACTCCTATAAAAAGTCAGATTAGTTAGATCGGAAGAGCGGTTTCAG     |
| chr11 | 125505439 | 125505478 | CHEK1_7127  | + | GTGACCTATGCACCAGACGTTATCTTGTGAGTGAAGAGTACCAATTTCTTGGATGAAAGTATGATCGGAAGAGCGGTTTCAG   |
| chr11 | 125507450 | 125507489 | CHEK1_7128  | + | GTGACCTATGCACCAGACGTTAAACTCAAGTTTGTGTTTTTCTGTGGAAGAAAAGTATGATCGGAAGAGCGGTTTCAG       |
| chr11 | 125513806 | 125513845 | CHEK1_7129  | + | GTGACCTATGCACCAGACGTTAAAGATTGAGTAGTTTTGATTGTAGTATCCCCATGAAAGATCGGAAGAGCGGTTTCAG      |
| chr11 | 125514174 | 125514213 | CHEK1_7130  | + | GTGACCTATGCACCAGACGTTAATTTTTTAAAGTAATGGCAGCTCTTATTTTTTATTAGATCGGAAGAGCGGTTTCAG       |
| chr11 | 125514549 | 125514588 | CHEK1_7131  | + | GTGACCTATGCACCAGACGTTTGAATTTTCATTATACCTTTTCTGAAGAAGAAATTAATAGATCGGAAGAGCGGTTTCAG     |
| chr11 | 125523753 | 125523792 | CHEK1_7132  | + | GTGACCTATGCACCAGACGTTGTTTTATTGATTCTTTCTATGGAAATATTTCTATGAAAGATCGGAAGAGCGGTTTCAG      |
| chr11 | 125525226 | 125525265 | CHEK1_7133  | + | GTGACCTATGCACCAGACGTGGCTGGGGAATCTGTGAAATATAGTGTCTGCTATGTTAGATCGGAAGAGCGGTTTCAG       |
| chr22 | 29083985  | 29084024  | CHEK2_7134  | + | GTGACCTATGCACCAGACGTAGGAAAATGGAGAAATGTTCAAAGAAAATCACTGGCTTCAGATCGGAAGAGCGGTTTCAG     |

|       |           |           |            |   |                                                                                      |
|-------|-----------|-----------|------------|---|--------------------------------------------------------------------------------------|
| chr22 | 29085214  | 29085253  | CHEK2_7135 | + | GTGACCTATGCACCAGACGTATTAATAAACATAAGTAGCTGTGTCTGAAGGATAATAAACTAGATCGGAAGAGCGGTTTCAG   |
| chr22 | 29090116  | 29090155  | CHEK2_7136 | + | GTGACCTATGCACCAGACGTAATTGGGCAAAATCACAGTGAAAAGGATAAAATATATTATCAAGATCGGAAGAGCGGTTTCAG  |
| chr22 | 29091241  | 29091280  | CHEK2_7137 | + | GTGACCTATGCACCAGACGTGTAGAGAGAGAAGGAAAAGAAATCAAGTGGCATTCTCAGAGATCGGAAGAGCGGTTTCAG     |
| chr22 | 29091872  | 29091911  | CHEK2_7138 | + | GTGACCTATGCACCAGACGTGTACAAAAGGGGAATAATGTTGAACCTGCCATAAAAATAAAAAGATCGGAAGAGCGGTTTCAG  |
| chr22 | 29092986  | 29093025  | CHEK2_7139 | + | GTGACCTATGCACCAGACGTAGGCAGGCATGACCCTCAGATTTCATGCAGTAGATACTTAAAGATCGGAAGAGCGGTTTCAG   |
| chr22 | 29095936  | 29095975  | CHEK2_7140 | + | GTGACCTATGCACCAGACGTAAAGCAAGGCAAGGGGTTTCATTCCTGGGGGAAAACCGCACTAGATCGGAAGAGCGGTTTCAG  |
| chr22 | 29099565  | 29099604  | CHEK2_7141 | + | GTGACCTATGCACCAGACGTGGGGAGAAAAGGGGAAAGTAGTGAGAAAACCTCCAAGAGGAGATCGGAAGAGCGGTTTCAG    |
| chr22 | 29106058  | 29106097  | CHEK2_7142 | + | GTGACCTATGCACCAGACGTGAGAATAACAGAGTTTTATTAGTAATAATAATTGCCAATATAGATCGGAAGAGCGGTTTCAG   |
| chr22 | 29108016  | 29108055  | CHEK2_7143 | + | GTGACCTATGCACCAGACGTAAACAAAGATAGTGATTGTCTGAATGTTTTTAATTATGAGAGATCGGAAGAGCGGTTTCAG    |
| chr22 | 29115484  | 29115523  | CHEK2_7144 | + | GTGACCTATGCACCAGACGTAAAGAGTAGAAAATGGGTTTTATTAAATTTATTACAAGAGGAGATCGGAAGAGCGGTTTCAG   |
| chr22 | 29121123  | 29121162  | CHEK2_7145 | + | GTGACCTATGCACCAGACGTGAACATTTTTGTTTCAGACTTTGAATAGCAGAGATTTATAGAGATCGGAAGAGCGGTTTCAG   |
| chr22 | 29121366  | 29121405  | CHEK2_7146 | + | GTGACCTATGCACCAGACGTAAAGCATGCATCAGAGGGCTGTTGAATTTTCATGTATCAAAAGATCGGAAGAGCGGTTTCAG   |
| chr22 | 29130720  | 29130759  | CHEK2_7147 | + | GTGACCTATGCACCAGACGTAAAAGAAAATGTCCAACAACAAGGGTGAGTTTTCAAGGCACAGATCGGAAGAGCGGTTTCAG   |
| chr13 | 103498715 | 103498754 | ERCC5_7148 | + | GTGACCTATGCACCAGACGTGCGCCGCGTTGGGACTTGGGGTGCAGGGATTTCGGGGCTGGAAGATCGGAAGAGCGGTTTCAG  |
| chr13 | 103504654 | 103504693 | ERCC5_7149 | + | GTGACCTATGCACCAGACGTTATAGTTTTTGTAGTAAAGTGTCAAATAATTTTTTTCTTCTGAGATCGGAAGAGCGGTTTCAG  |
| chr13 | 103506233 | 103506272 | ERCC5_7150 | + | GTGACCTATGCACCAGACGTAATTATAGTCGTGTTAGAGATGAAGTTTTAAAAAAGTGATAGATCGGAAGAGCGGTTTCAG    |
| chr13 | 103506735 | 103506774 | ERCC5_7151 | + | GTGACCTATGCACCAGACGTAACATTTTAAAGATATTTTGTACTTTGCTACATTCAGAGATCGGAAGAGCGGTTTCAG       |
| chr13 | 103508473 | 103508512 | ERCC5_7152 | + | GTGACCTATGCACCAGACGTCATTTTTAGTATGTAATGTAATTCGTTTTGAATTTGAAGATCGGAAGAGCGGTTTCAG       |
| chr13 | 103510779 | 103510818 | ERCC5_7153 | + | GTGACCTATGCACCAGACGTCAACAGTACATTCATGCTTAGAATTAAGAACTTCAGCAAAAAGATCGGAAGAGCGGTTTCAG   |
| chr13 | 103514075 | 103514114 | ERCC5_7154 | + | GTGACCTATGCACCAGACGTCCATCATTATATATTACATTAATAAATAAAGATATAGATCGGAAGAGCGGTTTCAG         |
| chr13 | 103515464 | 103515503 | ERCC5_7155 | + | GTGACCTATGCACCAGACGTGTGCTTTTTGTAGAAATCTGGAACGGTAGGATTTCCCCTCTAGATCGGAAGAGCGGTTTCAG   |
| chr13 | 103518272 | 103518311 | ERCC5_7156 | + | GTGACCTATGCACCAGACGTAACATTTGTGTTTCGACTCTTCTGCTGAGGAAGCCAGGTTAAAGATCGGAAGAGCGGTTTCAG  |
| chr13 | 103518742 | 103518781 | ERCC5_7157 | + | GTGACCTATGCACCAGACGTGCAGCTTGGGTTCTTTTACCACTTCTTCAGACCCCTGGAGATCGGAAGAGCGGTTTCAG      |
| chr13 | 103519206 | 103519245 | ERCC5_7158 | + | GTGACCTATGCACCAGACGTAGAGTCTTTTTGATTACTTTCTGACATTTACCTTCAGAGTAGATCGGAAGAGCGGTTTCAG    |
| chr13 | 103520618 | 103520657 | ERCC5_7159 | + | GTGACCTATGCACCAGACGTTTTATTTCTTAATTTGGATAATTGTGTAATACCCAAATAAGATCGGAAGAGCGGTTTCAG     |
| chr13 | 103524759 | 103524798 | ERCC5_7160 | + | GTGACCTATGCACCAGACGTCCTTTAAAAGAGAAGGAAACACCTTGTCAAATATGTTAGATCGGAAGAGCGGTTTCAG       |
| chr13 | 103525704 | 103525743 | ERCC5_7161 | + | GTGACCTATGCACCAGACGTTGGACCCCTCTCCTAAGTTCAGGATGAAGGGTAGGCTGTGAGATCGGAAGAGCGGTTTCAG    |
| chr13 | 103528264 | 103528303 | ERCC5_7162 | + | GTGACCTATGCACCAGACGTTGTATCTCTATAATTAGTTATGACAGCCATTTGTAATGAAGATCGGAAGAGCGGTTTCAG     |
| chr13 | 103527965 | 103528004 | ERCC5_7163 | + | GTGACCTATGCACCAGACGTCGCCCTCAGCAATCATCTGATGGATCTTCAAGTGAAGATAGATCGGAAGAGCGGTTTCAG     |
| chr13 | 103514748 | 103514787 | ERCC5_7164 | + | GTGACCTATGCACCAGACGTGAAGAAATGCGTATAAACAGCTCCACCAGAACAGTATGATGAGATCGGAAGAGCGGTTTCAG   |
| chr13 | 103515106 | 103515145 | ERCC5_7165 | + | GTGACCTATGCACCAGACGTATGAAACACATGCTGAAGTGTGAGCAGCAGAACGAACTAGATCGGAAGAGCGGTTTCAG      |
| chr10 | 90750674  | 90750713  | FAS_7166   | + | GTGACCTATGCACCAGACGTTCTGCCCCTGGTGGAGGCTTACCCCGCTTATGTCGGGGAGATCGGAAGAGCGGTTTCAG      |
| chr10 | 90762962  | 90763001  | FAS_7167   | + | GTGACCTATGCACCAGACGTCAAACATCCAGAGATTACAGTGAAAGTACAGTATAGGAGAGATCGGAAGAGCGGTTTCAG     |
| chr10 | 90767605  | 90767644  | FAS_7168   | + | GTGACCTATGCACCAGACGTTAAAATGCAATGAAAGAGGCCAATCTTGAATTTTCATGTAGATCGGAAGAGCGGTTTCAG     |
| chr10 | 90768765  | 90768804  | FAS_7169   | + | GTGACCTATGCACCAGACGTGTCTTTCTGATTAAAACACTAGATATAACATGAGAGTTAGATCGGAAGAGCGGTTTCAG      |
| chr10 | 90770368  | 90770407  | FAS_7170   | + | GTGACCTATGCACCAGACGTTTTTACGGTTTATTTCTCCTTTCCCCAACCCTCATGAAAAGATCGGAAGAGCGGTTTCAG     |
| chr10 | 90770574  | 90770613  | FAS_7171   | + | GTGACCTATGCACCAGACGTTAAGTTCTTGTCTTTGTTCAAACCTGCAGATTGAAATAACTTAGATCGGAAGAGCGGTTTCAG  |
| chr10 | 90770583  | 90770622  | FAS_7172   | + | GTGACCTATGCACCAGACGTGCTTTGTTCAAACCTGCAGATTGAAATAACTTTGGGAAGTAGAGATCGGAAGAGCGGTTTCAG  |
| chr10 | 90771769  | 90771808  | FAS_7173   | + | GTGACCTATGCACCAGACGTAGTACAGAAAACATGCAGAAAAGCACAGAAAAGGAAAACCAAAAGATCGGAAGAGCGGTTTCAG |
| chr10 | 90771849  | 90771888  | FAS_7174   | + | GTGACCTATGCACCAGACGTAATAGTTATCAGCTTTCCTTAAAAGAAAATAGAGAAAAGATCGGAAGAGCGGTTTCAG       |
| chr10 | 90773135  | 90773174  | FAS_7175   | + | GTGACCTATGCACCAGACGTATCATTTTTATTTTCATAGAGATTGCCATCCTTTAGAGTAATAGATCGGAAGAGCGGTTTCAG  |
| chr10 | 90773898  | 90773937  | FAS_7176   | + | GTGACCTATGCACCAGACGTCAACACTATTGCTGGAGTCATGACACTAAGTCAAGTTAAAAGATCGGAAGAGCGGTTTCAG    |
| chr10 | 90774218  | 90774257  | FAS_7177   | + | GTGACCTATGCACCAGACGTAACAAATTCAGTTCTGAGTATATGCAATTAGTGTGAAAAGATCGGAAGAGCGGTTTCAG      |
| chr10 | 123239546 | 123239585 | FGFR2_7178 | + | GTGACCTATGCACCAGACGTGGAAGAGAGAGCGTTTTTATTTCATCTTGGTCCAGGATAACAAGATCGGAAGAGCGGTTTCAG  |
| chr10 | 123241702 | 123241741 | FGFR2_7179 | + | GTGACCTATGCACCAGACGTTAAAACAGGGATATCAGTAGATTCCAAGTCTACAGTTAAAAGATCGGAAGAGCGGTTTCAG    |
| chr10 | 123243328 | 123243367 | FGFR2_7180 | + | GTGACCTATGCACCAGACGTGGATTTCCCTTGAAATTAATTTTCATGCACTGGGTAGCTGAGATCGGAAGAGCGGTTTCAG    |
| chr10 | 123245057 | 123245096 | FGFR2_7181 | + | GTGACCTATGCACCAGACGTAGGAGAAAAGCACGGCATTACTAACCCATCCACGTTGCCAAAGATCGGAAGAGCGGTTTCAG   |
| chr10 | 123246949 | 123246988 | FGFR2_7182 | + | GTGACCTATGCACCAGACGTAGAGAAAATGCAAAAATAAATATATTTAAAAGAATTTAAGATCGGAAGAGCGGTTTCAG      |
| chr10 | 123247638 | 123247677 | FGFR2_7183 | + | GTGACCTATGCACCAGACGTGAAAAGAAAGCAGAGAAATAAATAATTTCAAACACCCGCAAGATCGGAAGAGCGGTTTCAG    |
| chr10 | 123256247 | 123256286 | FGFR2_7184 | + | GTGACCTATGCACCAGACGTAGAAGAGAAGCTCCCTAAAGAGAGAAATCCAGGGTCTCCCCAGATCGGAAGAGCGGTTTCAG   |
| chr10 | 123258130 | 123258169 | FGFR2_7185 | + | GTGACCTATGCACCAGACGTTAGGCATATTCACAAATCAGTTTCTTCCCTAATCTAGATCGGAAGAGCGGTTTCAG         |
| chr10 | 123260472 | 123260511 | FGFR2_7186 | + | GTGACCTATGCACCAGACGTAAATAGGATGATTAGACATGCATCTGCTGTGATGGGTTGTAAGATCGGAAGAGCGGTTTCAG   |
| chr10 | 123263466 | 123263505 | FGFR2_7187 | + | GTGACCTATGCACCAGACGTAATGCAAAGACACAGATGTAATCCTGGCTCCATCTGAGAAAAGATCGGAAGAGCGGTTTCAG   |
| chr10 | 123274844 | 123274883 | FGFR2_7188 | + | GTGACCTATGCACCAGACGTGATCACAGGAGGAGGAACAGATAAGCAGGCCATAGAGTTAAGATCGGAAGAGCGGTTTCAG    |
| chr10 | 123276988 | 123277027 | FGFR2_7189 | + | GTGACCTATGCACCAGACGTAGGGAAAGCAAAGAAAAGGCTAGACGACACAGGAATGATTAGATCGGAAGAGCGGTTTCAG    |
| chr10 | 123278354 | 123278393 | FGFR2_7190 | + | GTGACCTATGCACCAGACGTACAGGAGAACAATAAACGGCCAACCCAGGAAGTCTTAGAGATCGGAAGAGCGGTTTCAG      |
| chr10 | 123279694 | 123279733 | FGFR2_7191 | + | GTGACCTATGCACCAGACGTGAGGGAAAGGAGGAGTGGGGATGGGGAATGAGAGACAGATCGGAAGAGCGGTTTCAG        |
| chr10 | 123298240 | 123298279 | FGFR2_7192 | + | GTGACCTATGCACCAGACGTCAAAGCAAAGGCGGTTTATTAACAATCCTAGCACAGATAAAGATCGGAAGAGCGGTTTCAG    |

|       |           |           |            |   |                                                                                     |
|-------|-----------|-----------|------------|---|-------------------------------------------------------------------------------------|
| chr10 | 123310984 | 123311023 | FGFR2_7193 | + | GTGACCTATGCACCAGACGTAAACAGTATTAGAATGTACTGATGGACAGCTTCCCCTCAGATCGGAAGAGCGGTTTCAG     |
| chr10 | 123324104 | 123324143 | FGFR2_7194 | + | GTGACCTATGCACCAGACGTAAAGAACATATTTCCATGGATGTGTTTTTTCAAAAGCAAAAAAGATCGGAAGAGCGGTTTCAG |
| chr10 | 123325229 | 123325268 | FGFR2_7195 | + | GTGACCTATGCACCAGACGTGTGGGAGAGAGAAGACGGAGACAGATGGGAAGGAGGGAGAAGATCGGAAGAGCGGTTTCAG   |
| chr10 | 123353342 | 123353381 | FGFR2_7196 | + | GTGACCTATGCACCAGACGTCCAATCCCCGGTCTCTCCATATCTCCATGTGGACGTTAAGATCGGAAGAGCGGTTTCAG     |
| chr1  | 32768345  | 32768384  | HDAC1_7197 | + | GTGACCTATGCACCAGACGTAGAGGTGCTACCGTCCCTAACCTCATCTGCTCTGGTTCAGATCGGAAGAGCGGTTTCAG     |
| chr1  | 32782394  | 32782433  | HDAC1_7198 | + | GTGACCTATGCACCAGACGTCTGTTCCCTCACACTGGAAGCCGCAGTTGCATCTCCAGATCGGAAGAGCGGTTTCAG       |
| chr1  | 32790165  | 32790204  | HDAC1_7199 | + | GTGACCTATGCACCAGACGTTCATCTCTCCAGGCTAGACTGGGTTGTCTAGTGAAGATCGGAAGAGCGGTTTCAG         |
| chr1  | 32792689  | 32792728  | HDAC1_7200 | + | GTGACCTATGCACCAGACGTCTGGCCTGTCTCTTGGAAAGACACCTTAGGCCAGTTCCAGATCGGAAGAGCGGTTTCAG     |
| chr1  | 32793289  | 32793328  | HDAC1_7201 | + | GTGACCTATGCACCAGACGTCTTTAGGAGCCAACCGGCTTACCCTCAGCTGGCAGCTCTAGATCGGAAGAGCGGTTTCAG    |
| chr1  | 32794772  | 32794811  | HDAC1_7202 | + | GTGACCTATGCACCAGACGTTATCCACCCTTTGGGCTACAAACAGGGGATTGGTTGGCGAGATCGGAAGAGCGGTTTCAG    |
| chr1  | 32796298  | 32796337  | HDAC1_7203 | + | GTGACCTATGCACCAGACGTGTAGCACAAGGATGGTGGGCGGGCTCTGCTTGGTGCTCAGATCGGAAGAGCGGTTTCAG     |
| chr1  | 32796520  | 32796559  | HDAC1_7204 | + | GTGACCTATGCACCAGACGTGAGGCGCAGGTTCCGGCTGGCTGGTGGGAGCTGGAGCTCAGATCGGAAGAGCGGTTTCAG    |
| chr1  | 32797194  | 32797233  | HDAC1_7205 | + | GTGACCTATGCACCAGACGTCTCCAGCACCCCTTGTTGTAACATTCCCTGACTTTGGTTAGATCGGAAGAGCGGTTTCAG    |
| chr1  | 32797418  | 32797457  | HDAC1_7206 | + | GTGACCTATGCACCAGACGTGACCTAGAGCCCTATGCCTTCCATTCAATAGGCAGCTCACAGATCGGAAGAGCGGTTTCAG   |
| chr1  | 32797854  | 32797893  | HDAC1_7207 | + | GTGACCTATGCACCAGACGTGTTGACTGGGACTTGGGCTCGAGCCTGAGAGGATGAATAGATCGGAAGAGCGGTTTCAG     |
| chr1  | 32798361  | 32798400  | HDAC1_7208 | + | GTGACCTATGCACCAGACGTAGCTGCCTGTGGCCATCTCCCTGGCATTGGAGCACCAGCCAGATCGGAAGAGCGGTTTCAG   |
| chr1  | 32798656  | 32798695  | HDAC1_7209 | + | GTGACCTATGCACCAGACGTCCAGCTCGGCTTCCGTGCTGAGTCCCTCACGTTTCTTCCAGATCGGAAGAGCGGTTTCAG    |
| chr4  | 55946341  | 55946380  | KDR_7210   | + | GTGACCTATGCACCAGACGTAAAGTGGCAACAAGGATGTTGGCAGAGAGAAGACAATTCTAGATCGGAAGAGCGGTTTCAG   |
| chr4  | 55948219  | 55948258  | KDR_7211   | + | GTGACCTATGCACCAGACGTGACAATGAGATGGCACAGTTAATTGAGCATATAAATGACAGATCGGAAGAGCGGTTTCAG    |
| chr4  | 55948813  | 55948852  | KDR_7212   | + | GTGACCTATGCACCAGACGTACAATATTTATATTTAGTGGTGGTATATTTGACTGCAGAGATCGGAAGAGCGGTTTCAG     |
| chr4  | 55953936  | 55953975  | KDR_7213   | + | GTGACCTATGCACCAGACGTAAACACAGAAAGACTGTTGTTATGGCTTCAGTTCTTCAAGTAGATCGGAAGAGCGGTTTCAG  |
| chr4  | 55955151  | 55955190  | KDR_7214   | + | GTGACCTATGCACCAGACGTAAAAACTGATTTTCAATTAATGCCTCTTTCTTCTTCTGAATGAGATCGGAAGAGCGGTTTCAG |
| chr4  | 55955651  | 55955690  | KDR_7215   | + | GTGACCTATGCACCAGACGTACAGGAGGAGACATCTTTGATTTGATTTTCTTATAGATCGGAAGAGCGGTTTCAG         |
| chr4  | 55955980  | 55956019  | KDR_7216   | + | GTGACCTATGCACCAGACGTAGAAAGCAGAAAGATTAGCAACCAATAGCAAAATCTGAAGATCGGAAGAGCGGTTTCAG     |
| chr4  | 55956256  | 55956295  | KDR_7217   | + | GTGACCTATGCACCAGACGTAATCATGTGTGCATTAGGTCTCGGCACAGCTGATCTCTTATAGATCGGAAGAGCGGTTTCAG  |
| chr4  | 55958892  | 55958931  | KDR_7218   | + | GTGACCTATGCACCAGACGTAGGCAGGAGGATGGAGATCAGTATTTCCATGAGTTAGTGTAGATCGGAAGAGCGGTTTCAG   |
| chr4  | 55961133  | 55961172  | KDR_7219   | + | GTGACCTATGCACCAGACGTGCAAAAGAAACAAACAACTCCTTGAAACAAAATGAGTCTAGATCGGAAGAGCGGTTTCAG    |
| chr4  | 55961843  | 55961882  | KDR_7220   | + | GTGACCTATGCACCAGACGTGATGTCAGGAAGGAAAATGGGTTTTCACTCATATTTCCCTCAGATCGGAAGAGCGGTTTCAG  |
| chr4  | 55962520  | 55962559  | KDR_7221   | + | GTGACCTATGCACCAGACGTAGTACAAGAGGAAATCATAGTATGGACATTTCTTCAAGATCGGAAGAGCGGTTTCAG       |
| chr4  | 55963944  | 55963983  | KDR_7222   | + | GTGACCTATGCACCAGACGTCAACAACAGCAACAACAAACAGACTGGATTACTATACAAAGATCGGAAGAGCGGTTTCAG    |
| chr4  | 55964450  | 55964489  | KDR_7223   | + | GTGACCTATGCACCAGACGTTCAATCCTTCCAGTCATAAACACACTGTTGTTGGCTGTTAGATCGGAAGAGCGGTTTCAG    |
| chr4  | 55964981  | 55965020  | KDR_7224   | + | GTGACCTATGCACCAGACGTACAATTGAATGAGTATCAACAGTTGAAACTTATACTTTATAGATCGGAAGAGCGGTTTCAG   |
| chr4  | 55968206  | 55968245  | KDR_7225   | + | GTGACCTATGCACCAGACGTAAAGAAAACGATCATTCTCATTATGATGATGATGCTGTGAGATCGGAAGAGCGGTTTCAG    |
| chr4  | 55968686  | 55968725  | KDR_7226   | + | GTGACCTATGCACCAGACGTAAAAAGAAAATCACAGAACATGGAATTATAACTTTTGAAGATCGGAAGAGCGGTTTCAG     |
| chr4  | 55971162  | 55971201  | KDR_7227   | + | GTGACCTATGCACCAGACGTGAGGCTAGTATTGAAATGGTGAATTAACCTGGTACAGCAGATCGGAAGAGCGGTTTCAG     |
| chr4  | 55972118  | 55972157  | KDR_7228   | + | GTGACCTATGCACCAGACGTAAAAACAAATCCCAGGCCATAAACACCGCGGCTGTTTGTAGATCGGAAGAGCGGTTTCAG    |
| chr4  | 55972988  | 55973027  | KDR_7229   | + | GTGACCTATGCACCAGACGTGAGATAACAGCGCATATATGATTTAATTTTTCTTTAATTAGATCGGAAGAGCGGTTTCAG    |
| chr4  | 55974071  | 55974110  | KDR_7230   | + | GTGACCTATGCACCAGACGTGAAAAACAACCTTTTGAATTTGCAGTACGCTTTGAAGAATGAGATCGGAAGAGCGGTTTCAG  |
| chr4  | 55976744  | 55976783  | KDR_7231   | + | GTGACCTATGCACCAGACGTAAATTTCTCAGGAATTAGTATAGTCAAAGGATTTGCTCTCAAGATCGGAAGAGCGGTTTCAG  |
| chr4  | 55976946  | 55976985  | KDR_7232   | + | GTGACCTATGCACCAGACGTAAAAAAGAAAAAGGTCAACTTACTGTAATGGTCTATTAGATCGGAAGAGCGGTTTCAG      |
| chr4  | 55979659  | 55979698  | KDR_7233   | + | GTGACCTATGCACCAGACGTGAGTTGACTGAACTTCAAAGACAGCAGCATATAACATTACCAGATCGGAAGAGCGGTTTCAG  |
| chr4  | 55980443  | 55980482  | KDR_7234   | + | GTGACCTATGCACCAGACGTAAATTTGAAAAACAGAAACATGAGAGAGCAAATAAGCCTAAGATCGGAAGAGCGGTTTCAG   |
| chr4  | 55981220  | 55981259  | KDR_7235   | + | GTGACCTATGCACCAGACGTAAAAAGACATATCAAATATTAATCCAGTACCAAAAATGAGAGATCGGAAGAGCGGTTTCAG   |
| chr4  | 55981589  | 55981628  | KDR_7236   | + | GTGACCTATGCACCAGACGTATTTAGTTTTATTAATGAGTTAATGATTTTACTAGAAAAAGATCGGAAGAGCGGTTTCAG    |
| chr4  | 55984978  | 55985017  | KDR_7237   | + | GTGACCTATGCACCAGACGTAAATTTCCAGGGAGGTATTAATAGATGACCTGACCTGAGAGATCGGAAGAGCGGTTTCAG    |
| chr4  | 55987368  | 55987407  | KDR_7238   | + | GTGACCTATGCACCAGACGTAAATAAATGAATGTATGGCCTGACTGATTAAGCTTAAGATCGGAAGAGCGGTTTCAG       |
| chr4  | 55991471  | 55991510  | KDR_7239   | + | GTGACCTATGCACCAGACGTGAGCCGGGGCAAATGCCAGAAGCTCGGGAGCCGGTCTTTAGATCGGAAGAGCGGTTTCAG    |
| chr7  | 150691060 | 150691099 | NOS3_7240  | + | GTGACCTATGCACCAGACGTGGCAGCTAGGAGCAGGTGGGCAACAAGGGTGGTGTCAAGGAGATCGGAAGAGCGGTTTCAG   |
| chr7  | 150692413 | 150692452 | NOS3_7241  | + | GTGACCTATGCACCAGACGTGTCGCTGTCCTGTCCTCCAGGAAAGGGTGGGTAAAGATCGGAAGAGCGGTTTCAG         |
| chr7  | 150693651 | 150693690 | NOS3_7242  | + | GTGACCTATGCACCAGACGTCCCGGACGCCACAGCCTCCCTTGTCCTCAGGCCCCAGAGATCGGAAGAGCGGTTTCAG      |
| chr7  | 150694024 | 150694063 | NOS3_7243  | + | GTGACCTATGCACCAGACGTCCAGCAGCTGAGAGCCCGGGCGCTACCAAAAAGGGAGCGGATCGGAAGAGCGGTTTCAG     |
| chr7  | 150695547 | 150695586 | NOS3_7244  | + | GTGACCTATGCACCAGACGTCCCAAGCCAGCCAGCCTTCTTCCCAAGGCAGGAGATCGGAAGAGCGGTTTCAG           |
| chr7  | 150695779 | 150695818 | NOS3_7245  | + | GTGACCTATGCACCAGACGTAGGGCCACCCATGAGGGTGTCCCAAGGTGGAGAATGAGGAGATCGGAAGAGCGGTTTCAG    |
| chr7  | 150696184 | 150696223 | NOS3_7246  | + | GTGACCTATGCACCAGACGTAAAGGATGACTGGGTGGGATGGAGGGGCCATCCCTGAGAGATCGGAAGAGCGGTTTCAG     |
| chr7  | 150696463 | 150696502 | NOS3_7247  | + | GTGACCTATGCACCAGACGTGGATGGGGCTCGGGCACGAATGCACCTGTCCAAGGCAGGAGATCGGAAGAGCGGTTTCAG    |
| chr7  | 150697698 | 150697737 | NOS3_7248  | + | GTGACCTATGCACCAGACGTCCAGACTGCCAGGAAAGGCAAGGGTTGCATACGGGGCAGATCGGAAGAGCGGTTTCAG      |
| chr7  | 150698524 | 150698563 | NOS3_7249  | + | GTGACCTATGCACCAGACGTAACTGGCTCTGCCAGCTCCGCGCCAGCTCTAAATTCGAAGATCGGAAGAGCGGTTTCAG     |
| chr7  | 150698716 | 150698755 | NOS3_7250  | + | GTGACCTATGCACCAGACGTGGAGCCCGGCTCTCCACACACACCTGGGGGCCACAGATCGGAAGAGCGGTTTCAG         |

|       |           |           |            |   |                                                                                      |
|-------|-----------|-----------|------------|---|--------------------------------------------------------------------------------------|
| chr7  | 150699064 | 150699103 | NOS3_7251  | + | GTGACCTATGCACCAGACGTGCCAGGGGAGCAGGGAGCTAGAAGAGGGGGCTCTATCAAGATCGGAAGAGCGGTTTCAG      |
| chr7  | 150699403 | 150699442 | NOS3_7252  | + | GTGACCTATGCACCAGACGTCCAGGAAAGGGGCTGCTGGGAATGAGGAGAGACTCAGAATAGATCGGAAGAGCGGTTTCAG    |
| chr7  | 150703593 | 150703632 | NOS3_7253  | + | GTGACCTATGCACCAGACGTTGAGAGTTTGGGGGAGCTGGGGGAGCTGATGCATTTGGAGAGATCGGAAGAGCGGTTTCAG    |
| chr7  | 150704104 | 150704143 | NOS3_7254  | + | GTGACCTATGCACCAGACGTCCACCAAGAGGGGTGCAACGGGTGGCAAGCTGCCCTGGGCAAGATCGGAAGAGCGGTTTCAG   |
| chr7  | 150704375 | 150704414 | NOS3_7255  | + | GTGACCTATGCACCAGACGTCCCAGCCCTGCTCTGACTCCTGCCCCCTGGGATGCCCTCCAGATCGGAAGAGCGGTTTCAG    |
| chr7  | 150706161 | 150706200 | NOS3_7256  | + | GTGACCTATGCACCAGACGTCCCTCACCTAACCCTGGTTCCTCTGAGGCCCCACACAGATCGGAAGAGCGGTTTCAG        |
| chr7  | 150706366 | 150706405 | NOS3_7257  | + | GTGACCTATGCACCAGACGTGGCTTTACCGCCCCCCACCCCTGTCTGAACACCTGAAGATCGGAAGAGCGGTTTCAG        |
| chr7  | 150707386 | 150707425 | NOS3_7258  | + | GTGACCTATGCACCAGACGTACCCCAATGAGGCACAGGGGCTAGAGAGACGGGATGAGCTAGATCGGAAGAGCGGTTTCAG    |
| chr7  | 150707906 | 150707945 | NOS3_7259  | + | GTGACCTATGCACCAGACGTAAAGCAGGAGCAGGCCTGGCCACAGCAGGGTTGGGACCGGCAGATCGGAAGAGCGGTTTCAG   |
| chr7  | 150708085 | 150708124 | NOS3_7260  | + | GTGACCTATGCACCAGACGTTGGAAGACTTGGTGGGGAGCTGCCAGGGTCAGGGTGGCAAGATCGGAAGAGCGGTTTCAG     |
| chr7  | 150709571 | 150709610 | NOS3_7261  | + | GTGACCTATGCACCAGACGTGGACTAAAGGACTGCCCTGAAGGGAGTCAACCAATCTAGGGAGATCGGAAGAGCGGTTTCAG   |
| chr7  | 150710478 | 150710517 | NOS3_7262  | + | GTGACCTATGCACCAGACGTCTGAGGGCGCAATGGTAACCTGAAGATGGGAGAGAGGGGAGATCGGAAGAGCGGTTTCAG     |
| chr7  | 150711017 | 150711056 | NOS3_7263  | + | GTGACCTATGCACCAGACGTGCGGGCCGGGCTGAGCCTGAGCTGCGGGTTCCTGCTAAGGTCTAGATCGGAAGAGCGGTTTCAG |
| chr7  | 150711268 | 150711307 | NOS3_7264  | + | GTGACCTATGCACCAGACGTGCTTTCCCTCCAGTTCGGGGAGAGCGGCTGCCCGACTCAAGATCGGAAGAGCGGTTTCAG     |
| chr9  | 98209744  | 98209783  | PTCH1_7265 | + | GTGACCTATGCACCAGACGTTGAGGGTGGGTAGAAGGGTGGTATCCCAGGCTGGGCATGAGATCGGAAGAGCGGTTTCAG     |
| chr9  | 98211616  | 98211655  | PTCH1_7266 | + | GTGACCTATGCACCAGACGTGGATTCCATGTTAAAAGTGTCTTGTCCATTACCTGCTGAGATCGGAAGAGCGGTTTCAG      |
| chr9  | 98212233  | 98212272  | PTCH1_7267 | + | GTGACCTATGCACCAGACGTAAGAGGAAACGGGAACACCGGCTGTGACAGGGTGGATCGCAGATCGGAAGAGCGGTTTCAG    |
| chr9  | 98215913  | 98215952  | PTCH1_7268 | + | GTGACCTATGCACCAGACGTGCCAAGATGTTCAACAGTGGTTCGACTTCACCTGGTAAGATCGGAAGAGCGGTTTCAG       |
| chr9  | 98218706  | 98218745  | PTCH1_7269 | + | GTGACCTATGCACCAGACGTGCACACAGTGGTCACTGCGGGGAGAGGTACCCTCTGGGGAGATCGGAAGAGCGGTTTCAG     |
| chr9  | 98220586  | 98220625  | PTCH1_7270 | + | GTGACCTATGCACCAGACGTAAGGGCACAGGTTAGGAGCAGCCAGGGTAGAAGAGCATCAGATCGGAAGAGCGGTTTCAG     |
| chr9  | 98222076  | 98222115  | PTCH1_7271 | + | GTGACCTATGCACCAGACGTGGGAAGAACAGAGGCCTTTGAGAATGGGGTTGGGGTAAAAGATCGGAAGAGCGGTTTCAG     |
| chr9  | 98224291  | 98224330  | PTCH1_7272 | + | GTGACCTATGCACCAGACGTCAATGATTGTAACACATTATACTGCAGCCAGAAGGACAGATCGGAAGAGCGGTTTCAG       |
| chr9  | 98229718  | 98229757  | PTCH1_7273 | + | GTGACCTATGCACCAGACGTAGAGGCACAAGGTACAGCCACAGGAGCAGCCTGACTTAGATCGGAAGAGCGGTTTCAG       |
| chr9  | 98231446  | 98231485  | PTCH1_7274 | + | GTGACCTATGCACCAGACGTGGGAAACATGTTGCAATGTTACTGAAACAGGGAAATGGAGATCGGAAGAGCGGTTTCAG      |
| chr9  | 98232224  | 98232263  | PTCH1_7275 | + | GTGACCTATGCACCAGACGTAAAAAATTCAGAGGTCACCAACATGCCTCCGCCAATCAGATCGGAAGAGCGGTTTCAG       |
| chr9  | 98238452  | 98238491  | PTCH1_7276 | + | GTGACCTATGCACCAGACGTAAAAACACAGCGCTGAGAGCTGCACTGGACATGGTCCCCTAGATCGGAAGAGCGGTTTCAG    |
| chr9  | 98239150  | 98239189  | PTCH1_7277 | + | GTGACCTATGCACCAGACGTAAACAGAGGATGGTGGCATTAGACATGCGAGATGCAATTAAGATCGGAAGAGCGGTTTCAG    |
| chr9  | 98239995  | 98240034  | PTCH1_7278 | + | GTGACCTATGCACCAGACGTAACAATGGGGGCACAGAACAAGCCGAACATTAGAATGTAGATCGGAAGAGCGGTTTCAG      |
| chr9  | 98240479  | 98240518  | PTCH1_7279 | + | GTGACCTATGCACCAGACGTAACAGAATCGGAAATGCCAAATGCAATGAACACTCCACAGATCGGAAGAGCGGTTTCAG      |
| chr9  | 98241440  | 98241479  | PTCH1_7280 | + | GTGACCTATGCACCAGACGTGTCCAAGGGGAAGGCACATCAGTATTCCAGGAAGCAGAGATCGGAAGAGCGGTTTCAG       |
| chr9  | 98242881  | 98242920  | PTCH1_7281 | + | GTGACCTATGCACCAGACGTAATTAGGAGACGAGACCATGAAAAGAGCCTTCTAAACGCAAGATCGGAAGAGCGGTTTCAG    |
| chr9  | 98244333  | 98244372  | PTCH1_7282 | + | GTGACCTATGCACCAGACGTTAAAAAGAGAGGCCATGGTTAGGTTAAGGCACACTACTAGATCGGAAGAGCGGTTTCAG      |
| chr9  | 98248108  | 98248147  | PTCH1_7283 | + | GTGACCTATGCACCAGACGTCCAATCTTCTGGCGAGTATAATTTAATTCACGACTTACTCAGATCGGAAGAGCGGTTTCAG    |
| chr9  | 98248167  | 98248206  | PTCH1_7284 | + | GTGACCTATGCACCAGACGTTGTACAGGTTAATTAAGAATAGCAAAAACACTGCAAACTCAGATCGGAAGAGCGGTTTCAG    |
| chr9  | 98268892  | 98268931  | PTCH1_7285 | + | GTGACCTATGCACCAGACGTGGGAGGAGGAGGTGACAGGAAAGGCCCTCCTAATCAGACGTAGATCGGAAGAGCGGTTTCAG   |
| chr9  | 98278764  | 98278803  | PTCH1_7286 | + | GTGACCTATGCACCAGACGTCAACCCCTGCTCGGAGCGCGGTTGCCGATGGCGCGGACGAGATCGGAAGAGCGGTTTCAG     |
| chr9  | 98279113  | 98279152  | PTCH1_7287 | + | GTGACCTATGCACCAGACGTGGGGTGGTCTGCCGCGCCATAGGCAGGACCTGTCAGGGTAGATCGGAAGAGCGGTTTCAG     |
| chr9  | 98209474  | 98209513  | PTCH1_7288 | + | GTGACCTATGCACCAGACGTGTGGACGCTGGGTTCGAGGGTGTGAGAACGGGCCCGCCAGATCGGAAGAGCGGTTTCAG      |
| chr5  | 1253957   | 1253996   | TERT_7289  | + | GTGACCTATGCACCAGACGTAAAAATCAGACTCCGTTCCAGAAGAGGCCAGAGGTGGCATCAGATCGGAAGAGCGGTTTCAG   |
| chr5  | 1254631   | 1254670   | TERT_7290  | + | GTGACCTATGCACCAGACGTACAGAGGCTGAGGAGTCAAGGCCAGCCAGCCAGCTCCCTCAGATCGGAAGAGCGGTTTCAG    |
| chr5  | 1255537   | 1255576   | TERT_7291  | + | GTGACCTATGCACCAGACGTGGGAGGACAGCTGAGGAAAGGCCCTCCTAATCAGACGTAGATCGGAAGAGCGGTTTCAG      |
| chr5  | 1258785   | 1258824   | TERT_7292  | + | GTGACCTATGCACCAGACGTCAAGAAAGAGTGAGAAACGGTAGAAACCTCTCTGGGATTAGATCGGAAGAGCGGTTTCAG     |
| chr5  | 1260726   | 1260765   | TERT_7293  | + | GTGACCTATGCACCAGACGTGGGGGGAATGTCAGACACAGGTGCCCTGCCCCACACCCAGCAGATCGGAAGAGCGGTTTCAG   |
| chr5  | 1264718   | 1264757   | TERT_7294  | + | GTGACCTATGCACCAGACGTGGGGCAATGTCAGCCCCAGGATGCGGGGCGCTCACCCAGGAGATCGGAAGAGCGGTTTCAG    |
| chr5  | 1266661   | 1266700   | TERT_7295  | + | GTGACCTATGCACCAGACGTGGAAAATACACAGCAAGGTTAATCTTACGTTTACGTAAGATCGGAAGAGCGGTTTCAG       |
| chr5  | 1268759   | 1268798   | TERT_7296  | + | GTGACCTATGCACCAGACGTAAGACAGCTGAGACAGGTCAGGACGCGGATGTGCTGACATAGATCGGAAGAGCGGTTTCAG    |
| chr5  | 1271330   | 1271369   | TERT_7297  | + | GTGACCTATGCACCAGACGTAGACGGGAGACACATGGGAGTGAGCCGGTGGGTGCTGAGAAGATCGGAAGAGCGGTTTCAG    |
| chr5  | 1272406   | 1272445   | TERT_7298  | + | GTGACCTATGCACCAGACGTAGGAGAGGGCATGAGCCAAATGTGGCCTGCCCGGCCAAGATCGGAAGAGCGGTTTCAG       |
| chr5  | 1278886   | 1278925   | TERT_7299  | + | GTGACCTATGCACCAGACGTGTGTGCTAGCGCCCGTCCACATCCACTGTGTGAGTGGAGAGATCGGAAGAGCGGTTTCAG     |
| chr5  | 1278922   | 1278961   | TERT_7300  | + | GTGACCTATGCACCAGACGTGGAGGCCGAGGAGACTGACAGTGCCACGCAGAACTCAGAAGATCGGAAGAGCGGTTTCAG     |
| chr5  | 1279596   | 1279635   | TERT_7301  | + | GTGACCTATGCACCAGACGTGACATGGGACAGACTCAGGAAAGTGATCCGGCCAAGTGGATCGGAAGAGCGGTTTCAG       |
| chr5  | 1280464   | 1280503   | TERT_7302  | + | GTGACCTATGCACCAGACGTGAGCCCTCAGGAGGCTTCTCAGCCAGACAACAGACTAGAGATCGGAAGAGCGGTTTCAG      |
| chr5  | 1282750   | 1282789   | TERT_7303  | + | GTGACCTATGCACCAGACGTAAGGACATGCCACATCCAGATCACCGAGGGCCTGGTGACCAGATCGGAAGAGCGGTTTCAG    |
| chr5  | 1294792   | 1294831   | TERT_7304  | + | GTGACCTATGCACCAGACGTAGCGCCCTGAGTCGCCTGCGCTGCTCTCCGATGTCGCTGAGATCGGAAGAGCGGTTTCAG     |
| chr5  | 1295115   | 1295154   | TERT_7305  | + | GTGACCTATGCACCAGACGTGCCGGGGCCAGGGCTCCACAGTCCGCAGCAGGACGCAGCAGATCGGAAGAGCGGTTTCAG     |
| chr5  | 1293889   | 1293928   | TERT_7306  | + | GTGACCTATGCACCAGACGTGAGGCCCTGGAACCCAGAAAGATGGTCTCCACGAGCCCTCAGATCGGAAGAGCGGTTTCAG    |
| chr5  | 1294340   | 1294379   | TERT_7307  | + | GTGACCTATGCACCAGACGTTACCCTGTGTCTTGGTAGGCTAGAGGGAAATGCAGAGAAGATCGGAAGAGCGGTTTCAG      |
| chr16 | 2098765   | 2098804   | TSC2_7308  | + | GTGACCTATGCACCAGACGTTACCTGTGTCTTGGTAGGCTAGAGGGAAATGCAGAGAAGATCGGAAGAGCGGTTTCAG       |

|       |          |          |           |   |                                                                                       |
|-------|----------|----------|-----------|---|---------------------------------------------------------------------------------------|
| chr16 | 2100498  | 2100537  | TSC2_7309 | + | GTGACCTATGCACCAGACGTCCTTGTAGCTACTAGAGAGAGGCACGCTAGACTATTTCAGAAGATCGGAAGAGCGGTTTCAG    |
| chr16 | 2103464  | 2103503  | TSC2_7310 | + | GTGACCTATGCACCAGACGTTGGGCGACGCTGGGATGGGTGACGTCAGGCTGCCACTGACAGATCGGAAGAGCGGTTTCAG     |
| chr16 | 2104452  | 2104491  | TSC2_7311 | + | GTGACCTATGCACCAGACGTCCTTGGGTTGGAGGTTTCTCTGGCCCTTGACGATCAAGTGTAGATCGGAAGAGCGGTTTCAG    |
| chr16 | 2105531  | 2105570  | TSC2_7312 | + | GTGACCTATGCACCAGACGTAATTGAGATCCTGTTCTGATAATGGTCTTAAGTTCAGCTCAGATCGGAAGAGCGGTTTCAG     |
| chr16 | 2106781  | 2106820  | TSC2_7313 | + | GTGACCTATGCACCAGACGTTGAAACTGCCTGGAAGGTTCTGAGAGCACATGGATGGGAGATCGGAAGAGCGGTTTCAG       |
| chr16 | 2107190  | 2107229  | TSC2_7314 | + | GTGACCTATGCACCAGACGTTGGTGGGGCCGAGGCGAGTGAGGCCCAGCACAGCCCCTCGAGATCGGAAGAGCGGTTTCAG     |
| chr16 | 2108885  | 2108924  | TSC2_7315 | + | GTGACCTATGCACCAGACGTTTCTGTGTGCAGTGGCAGGAAACCGGAGAGCTCCCAGATCGGAAGAGCGGTTTCAG          |
| chr16 | 2110825  | 2110864  | TSC2_7316 | + | GTGACCTATGCACCAGACGTTGGCAGGAGCTCCGGGAGCACCGGGAACCCAGACAGGCAGAGATCGGAAGAGCGGTTTCAG     |
| chr16 | 2112020  | 2112059  | TSC2_7317 | + | GTGACCTATGCACCAGACGTTCCCTGGGTGGGGCCTTTGGGCTTTGGCTGGTGGGAGGGAGATCGGAAGAGCGGTTTCAG      |
| chr16 | 2112612  | 2112651  | TSC2_7318 | + | GTGACCTATGCACCAGACGTTCTGTAGCCTTGCCTGGCACCTGGAGCCTGGCCCTGTCTAGATCGGAAGAGCGGTTTCAG      |
| chr16 | 2113065  | 2113104  | TSC2_7319 | + | GTGACCTATGCACCAGACGTAGGCGGCCGACGCTGGGGGCTCAGGGCTATTTCTCCGTGGAGATCGGAAGAGCGGTTTCAG     |
| chr16 | 2114439  | 2114478  | TSC2_7320 | + | GTGACCTATGCACCAGACGTTTGTACCCGGGGCCGGGTGCATGCGTCCAGAGCTCCGTGAGATCGGAAGAGCGGTTTCAG      |
| chr16 | 2115647  | 2115686  | TSC2_7321 | + | GTGACCTATGCACCAGACGTTGACGAGGCCTCTGCTCCCGGGGCGCGCATGGCTAGCGTAGATCGGAAGAGCGGTTTCAG      |
| chr16 | 2120590  | 2120629  | TSC2_7322 | + | GTGACCTATGCACCAGACGTTGGGGTTGCGCAGCCAGTTCCTGGGGGCCAGCCAGGTATAGATCGGAAGAGCGGTTTCAG      |
| chr16 | 2121628  | 2121667  | TSC2_7323 | + | GTGACCTATGCACCAGACGTTCCCGCCACGGCCCATGAGGCTCAGGGCGTCAGAGGCGCAGATCGGAAGAGCGGTTTCAG      |
| chr16 | 2121946  | 2121985  | TSC2_7324 | + | GTGACCTATGCACCAGACGTTCCGGGCGAGGGACCATCGTCCACGTTGGGCCAGGAGACAGATCGGAAGAGCGGTTTCAG      |
| chr16 | 2122375  | 2122414  | TSC2_7325 | + | GTGACCTATGCACCAGACGTTGGCCCTGGGGTGGGGTGGGGGACCAGTAGGGTTTTTCCAGATCGGAAGAGCGGTTTCAG      |
| chr16 | 2122995  | 2123034  | TSC2_7326 | + | GTGACCTATGCACCAGACGTAGAGCAGGACGGGCGAGCTGTGATGGGGCTGGGATTCGAGAGATCGGAAGAGCGGTTTCAG     |
| chr16 | 2124401  | 2124440  | TSC2_7327 | + | GTGACCTATGCACCAGACGTTGCCCTGCGCATGCACCCGAGAGGTTCCGGCTGTGTAAGATCGGAAGAGCGGTTTCAG        |
| chr16 | 2125904  | 2125943  | TSC2_7328 | + | GTGACCTATGCACCAGACGTGCCCCAGGCCCTGTGCCTCCCAGCCGTGGCCCGCCGCTAGGAGATCGGAAGAGCGGTTTCAG    |
| chr16 | 2126182  | 2126221  | TSC2_7329 | + | GTGACCTATGCACCAGACGTTGGCCGTTGAAGGCTGTGTCTCCTGGTAGGCCAGGGCTTGAGATCGGAAGAGCGGTTTCAG     |
| chr16 | 2126597  | 2126636  | TSC2_7330 | + | GTGACCTATGCACCAGACGTTCCGGGGTGTGCCTGGAGTCCGGTGTGGGGTGGGGAAGGACAAGATCGGAAGAGCGGTTTCAG   |
| chr16 | 2127738  | 2127777  | TSC2_7331 | + | GTGACCTATGCACCAGACGTTGTCGGTGGGGGGCACGGACCCTGGAGCTTGCCCGCTGAGATCGGAAGAGCGGTTTCAG       |
| chr16 | 2129208  | 2129247  | TSC2_7332 | + | GTGACCTATGCACCAGACGTTCACTACAGGCTGGCGGGCTCCGGAGCTCCACGGCAAGTCCAGGAGCGGTTTCAG           |
| chr16 | 2129440  | 2129479  | TSC2_7333 | + | GTGACCTATGCACCAGACGTTCTCCTTCCCTCCGCGCCTGCCAGCCTCGACACCGGCTGTAGATCGGAAGAGCGGTTTCAG     |
| chr16 | 2129681  | 2129720  | TSC2_7334 | + | GTGACCTATGCACCAGACGTTGCCACAGCCACCTCCACACAGGCACCGGGCTCCCTCAGTAGATCGGAAGAGCGGTTTCAG     |
| chr16 | 2130389  | 2130428  | TSC2_7335 | + | GTGACCTATGCACCAGACGTTGGGCTGGCCTGAGCGCCATCTTCTGCCAGTACCCACAGAGATCGGAAGAGCGGTTTCAG      |
| chr16 | 2131810  | 2131849  | TSC2_7336 | + | GTGACCTATGCACCAGACGTTGGCGGGCCTTGGCACGGGCTCTGCTCCCCTGGCCTGGTAGATCGGAAGAGCGGTTTCAG      |
| chr16 | 2132516  | 2132555  | TSC2_7337 | + | GTGACCTATGCACCAGACGTTGAGAGGGAAGCGTTGGCTGCAGAGCGCCACTCGCTCAGATCGGAAGAGCGGTTTCAG        |
| chr16 | 2133828  | 2133867  | TSC2_7338 | + | GTGACCTATGCACCAGACGTTCTCAGAGCCTGACCCCTGACTGCTGACCTCGGGGGCTCCTTAGAGATCGGAAGAGCGGTTTCAG |
| chr16 | 2134727  | 2134766  | TSC2_7339 | + | GTGACCTATGCACCAGACGTTGCTTCCGGGCGGGGCTCCTGACACCTCTCCTGCGGGAACAGATCGGAAGAGCGGTTTCAG     |
| chr16 | 2135038  | 2135077  | TSC2_7340 | + | GTGACCTATGCACCAGACGTTCCCTCCTCCTGATCCGCTGGAGCTGTGTGGCTCGGGTGTAGATCGGAAGAGCGGTTTCAG     |
| chr16 | 2135334  | 2135373  | TSC2_7341 | + | GTGACCTATGCACCAGACGTTGGGGCCGGCCCTAGTGCCTGGACAGGGCCAGCTGGGCCTCAGATCGGAAGAGCGGTTTCAG    |
| chr16 | 2136391  | 2136430  | TSC2_7342 | + | GTGACCTATGCACCAGACGTTGCCCTACCCTCCTGCTGCCCCAGGCCCTCAGGGCACGGAGATCGGAAGAGCGGTTTCAG      |
| chr16 | 2136883  | 2136922  | TSC2_7343 | + | GTGACCTATGCACCAGACGTTGCCCTGAGGCTGAGGCTGGCCCAAGCCAGGTCAGGATCGGAAGAGCGGTTTCAG           |
| chr16 | 2137953  | 2137992  | TSC2_7344 | + | GTGACCTATGCACCAGACGTTGGGGCCCTGCAGTGCAGGAAAGTAGGGCCGGGTGGGAGATCGGAAGAGCGGTTTCAG        |
| chr16 | 2138151  | 2138190  | TSC2_7345 | + | GTGACCTATGCACCAGACGTTGGGTCCAGGCGTGAGCTGGTGGGACAGGCCAGGTGCCAGATCGGAAGAGCGGTTTCAG       |
| chr16 | 2138337  | 2138376  | TSC2_7346 | + | GTGACCTATGCACCAGACGTTGGGGCTCCCTCAGCGGGGTGTGCTGGCTGCCAAGCTGTAGATCGGAAGAGCGGTTTCAG      |
| chr16 | 2138622  | 2138661  | TSC2_7347 | + | GTGACCTATGCACCAGACGTTCCCTCCTGCACCTGGCCCTGGACGGTATTGCCTGTCTAGATCGGAAGAGCGGTTTCAG       |
| chr15 | 91290731 | 91290770 | BLM_7348  | + | GTGACCTATGCACCAGACGTTGACTGGTTTCTGTGTCACATAGGCACTAACTACCACATAGATCGGAAGAGCGGTTTCAG      |
| chr15 | 91293308 | 91293347 | BLM_7349  | + | GTGACCTATGCACCAGACGTTTATCTTATTCTATTGTAGTATGCTCATTTGACTTTTTTATTAGATCGGAAGAGCGGTTTCAG   |
| chr15 | 91295187 | 91295226 | BLM_7350  | + | GTGACCTATGCACCAGACGTTAAATAATTAGCATTATTATTGTTTCTGGGATACTTTAAAGATCGGAAGAGCGGTTTCAG      |
| chr15 | 91298179 | 91298218 | BLM_7351  | + | GTGACCTATGCACCAGACGTTATTTTAGACATACCATGTATTTCAACTACTTACTTTTGAAGATCGGAAGAGCGGTTTCAG     |
| chr15 | 91303520 | 91303559 | BLM_7352  | + | GTGACCTATGCACCAGACGTTTCCCCCTTCTGGAATATATCTGATTATATTTACCACAGATCGGAAGAGCGGTTTCAG        |
| chr15 | 91304496 | 91304535 | BLM_7353  | + | GTGACCTATGCACCAGACGTTAAATAAATGAATGCTTATATAAAAACAAAAGTGTCCCAAAGATCGGAAGAGCGGTTTCAG     |
| chr15 | 91306398 | 91306437 | BLM_7354  | + | GTGACCTATGCACCAGACGTTTAGAAGTGAATTTGCGAGATGCAATCCATTGGCAGATGTTAAAGATCGGAAGAGCGGTTTCAG  |
| chr15 | 91308655 | 91308694 | BLM_7355  | + | GTGACCTATGCACCAGACGTTAAATACTAATAAAAAACACGCCCTTAGAAACAATTAATTTAGATCGGAAGAGCGGTTTCAG    |
| chr15 | 91312472 | 91312511 | BLM_7356  | + | GTGACCTATGCACCAGACGTTTTTTTATATCCGGAAATACCGATAAATACATACTACCAAAGATCGGAAGAGCGGTTTCAG     |
| chr15 | 91312827 | 91312866 | BLM_7357  | + | GTGACCTATGCACCAGACGTTGCACGTCACGTATTTGAGAACCCCTGGGGCAGTGACTGCCAAGATCGGAAGAGCGGTTTCAG   |
| chr15 | 91326169 | 91326208 | BLM_7358  | + | GTGACCTATGCACCAGACGTTCCATGTGATTAGCTGTCTAGAAGTAACAAATGCTTTTTAAGATCGGAAGAGCGGTTTCAG     |
| chr15 | 91328322 | 91328361 | BLM_7359  | + | GTGACCTATGCACCAGACGTTAAAGATAAAACAATAATAGAAATACTTTTATAGCATAAGATCGGAAGAGCGGTTTCAG       |
| chr15 | 91334085 | 91334124 | BLM_7360  | + | GTGACCTATGCACCAGACGTTCCATTGTAGAGACATCTGCATCTCACCTCAGCCTCAGATAGATCGGAAGAGCGGTTTCAG     |
| chr15 | 91341578 | 91341617 | BLM_7361  | + | GTGACCTATGCACCAGACGTTGTTTTGAATGTTTGTAGTTACTTCAATTGAAATTGAACATAGATCGGAAGAGCGGTTTCAG    |
| chr15 | 91346961 | 91347000 | BLM_7362  | + | GTGACCTATGCACCAGACGTTTTTCATGTTTATTTTATCTCACAAATGAGTGAACCAAAGATCGGAAGAGCGGTTTCAG       |
| chr15 | 91347600 | 91347639 | BLM_7363  | + | GTGACCTATGCACCAGACGTTGATTCCTTTGTTACTGTGCACAGATTAATAGGCCGAAAAGATCGGAAGAGCGGTTTCAG      |
| chr15 | 91352500 | 91352539 | BLM_7364  | + | GTGACCTATGCACCAGACGTAGCCATGTGTCTCTAAAAGCCTGTTTAATGTGAAGCGAGATCGGAAGAGCGGTTTCAG        |
| chr15 | 91354647 | 91354686 | BLM_7365  | + | GTGACCTATGCACCAGACGTTTTCATGATCTTTTTCTAATATAGGAAAGGAAAGAACAGACAGATCGGAAGAGCGGTTTCAG    |
| chr15 | 91358520 | 91358559 | BLM_7366  | + | GTGACCTATGCACCAGACGTTCAATGTACATAGACCCCTTTTCTTTGTTGTCAGCATCTGAGATCGGAAGAGCGGTTTCAG     |

|       |           |           |             |   |                                                                                       |
|-------|-----------|-----------|-------------|---|---------------------------------------------------------------------------------------|
| chr15 | 91292957  | 91292996  | BLM_7367    | + | GTGACCTATGCACCAGACGTTTGGGATGATATGGATGACTTTGATACTTCTGAGACTTCAAGATCGGAAGAGCGGTTTCAG     |
| chr15 | 91304165  | 91304204  | BLM_7368    | + | GTGACCTATGCACCAGACGTCAGGAAATGTTCTCACAAAGCACTGCTGTGAAAGATCAGAAAGATCGGAAGAGCGGTTTCAG    |
| chr11 | 119103416 | 119103455 | CBL_7369    | + | GTGACCTATGCACCAGACGTAATACTACACAAATAAATATGCAGGTCGTGACTGCCTGAAGATCGGAAGAGCGGTTTCAG      |
| chr11 | 119142602 | 119142641 | CBL_7370    | + | GTGACCTATGCACCAGACGTGAATAATGAATTTGAACTATGAAAACTAAAGCTTACGAGAGATCGGAAGAGCGGTTTCAG      |
| chr11 | 119144745 | 119144784 | CBL_7371    | + | GTGACCTATGCACCAGACGTAAAAAAGTTGACTAAACTGGTTACTCTACTTCGGTGAAGAGATCGGAAGAGCGGTTTCAG      |
| chr11 | 119145674 | 119145713 | CBL_7372    | + | GTGACCTATGCACCAGACGTTGACGCCAAAGACTGTTTATTCTTCTGAATTTCTGTTATCTTGAAGATCGGAAGAGCGGTTTCAG |
| chr11 | 119146855 | 119146894 | CBL_7373    | + | GTGACCTATGCACCAGACGTACTGCATACCATCTGTTAGGACTGCGGAACCTTAGGGCTGAGATCGGAAGAGCGGTTTCAG     |
| chr11 | 119148565 | 119148604 | CBL_7374    | + | GTGACCTATGCACCAGACGTTTTTCACATGATAACCATATCACTGGACACAAGCTTTAGTAAGATCGGAAGAGCGGTTTCAG    |
| chr11 | 119149018 | 119149057 | CBL_7375    | + | GTGACCTATGCACCAGACGTAACAGCGACTTTTTTCAGCTATGTAATAACCTTGGAAAAAGATCGGAAGAGCGGTTTCAG      |
| chr11 | 119149434 | 119149473 | CBL_7376    | + | GTGACCTATGCACCAGACGTAGTTTAGGAGACTGGCAAATCCATTGTGAGTTGCTTCTAGATCGGAAGAGCGGTTTCAG       |
| chr11 | 119155821 | 119155860 | CBL_7377    | + | GTGACCTATGCACCAGACGTTTCCATTACGTGCAGTTTTTTGGGATCTTTGCTGTGTACTAGAGATCGGAAGAGCGGTTTCAG   |
| chr11 | 119158667 | 119158706 | CBL_7378    | + | GTGACCTATGCACCAGACGTTAAAGCTATATTTGTACAGTGGAGTTGTACTTGTAAAAAGATCGGAAGAGCGGTTTCAG       |
| chr11 | 119167755 | 119167794 | CBL_7379    | + | GTGACCTATGCACCAGACGTAAACAACCCCTTTTTGGCCCTATACCTTTATGTGGGTAATTAGATCGGAAGAGCGGTTTCAG    |
| chr11 | 119168202 | 119168241 | CBL_7380    | + | GTGACCTATGCACCAGACGTATTCTGCTACTTTAAAAATCATTGATATGTCATAGGAATGAGATCGGAAGAGCGGTTTCAG     |
| chr11 | 119169261 | 119169300 | CBL_7381    | + | GTGACCTATGCACCAGACGTAGACTACTTTGGGTTTGTCTGAATGCGAGTGTCGCTGTAGATCGGAAGAGCGGTTTCAG       |
| chr11 | 119170502 | 119170541 | CBL_7382    | + | GTGACCTATGCACCAGACGTCCCTGCTGCAAGTTTAGAGGACCAGTGAGTTGGGAGTTATAGATCGGAAGAGCGGTTTCAG     |
| chr17 | 48263020  | 48263059  | COL1A1_7383 | + | GTGACCTATGCACCAGACGTGCGGAGACAACGGGAGGGGACCTTACCACGTGGGAGTGATAGATCGGAAGAGCGGTTTCAG     |
| chr17 | 48263392  | 48263431  | COL1A1_7384 | + | GTGACCTATGCACCAGACGTGGGGAGAGAGGGGAGGTCAGCCCTATGCGGGAACCTTAGATCGGAAGAGCGGTTTCAG        |
| chr17 | 48263879  | 48263918  | COL1A1_7385 | + | GTGACCTATGCACCAGACGTGCAGGGCAAGATGGAGTCAGGGAAGGGAGCAGCCAGCACAGATCGGAAGAGCGGTTTCAG      |
| chr17 | 48264294  | 48264333  | COL1A1_7386 | + | GTGACCTATGCACCAGACGTAGGGAGAGAGTGGGGATTACCGGCATCCAAGTGTCTTTGGAGATCGGAAGAGCGGTTTCAG     |
| chr17 | 48264494  | 48264533  | COL1A1_7387 | + | GTGACCTATGCACCAGACGTGGAATGGTTTGAGAAAGGCTGCCAGAAGCCGAACACCAGATCGGAAGAGCGGTTTCAG        |
| chr17 | 48264909  | 48264948  | COL1A1_7388 | + | GTGACCTATGCACCAGACGTGATAAAAAGGCGAGTTCAGGCCAGTGAGCGTCAAATGTAAGATCGGAAGAGCGGTTTCAG      |
| chr17 | 48265355  | 48265394  | COL1A1_7389 | + | GTGACCTATGCACCAGACGTGAAAGGGCAACAACGTCAGCCGGAAGTTCCATTGGCCTGAGATCGGAAGAGCGGTTTCAG      |
| chr17 | 48265521  | 48265560  | COL1A1_7390 | + | GTGACCTATGCACCAGACGTCAAGGAAAGCATGAGCTCTTGGCCAGTGGGAAAGGCTGAGGCTAGATCGGAAGAGCGGTTTCAG  |
| chr17 | 48266009  | 48266048  | COL1A1_7391 | + | GTGACCTATGCACCAGACGTGAGCAGGGGAATATGGGTGAGCCCGGGTGAAGGGCCAGGAGATCGGAAGAGCGGTTTCAG      |
| chr17 | 48266167  | 48266206  | COL1A1_7392 | + | GTGACCTATGCACCAGACGTAGAGAGAGAGAAGTGAGAGTCAGCCGGGAAGAGGGCTTAAAGATCGGAAGAGCGGTTTCAG     |
| chr17 | 48266382  | 48266421  | COL1A1_7393 | + | GTGACCTATGCACCAGACGTAGAAAGAGTCAAGCCAGAGATAGGGTCTGGGAGGACCCTTAGATCGGAAGAGCGGTTTCAG     |
| chr17 | 48266647  | 48266686  | COL1A1_7394 | + | GTGACCTATGCACCAGACGTCAAACAGGGGTGAGGTGCCAGAGCAGCAGCAGGGACCCAGATCGGAAGAGCGGTTTCAG       |
| chr17 | 48266910  | 48266949  | COL1A1_7395 | + | GTGACCTATGCACCAGACGTATAGGAGGGGCTGACAGTCCAGGGGCTCTGGTGCATCAGATCGGAAGAGCGGTTTCAG        |
| chr17 | 48267104  | 48267143  | COL1A1_7396 | + | GTGACCTATGCACCAGACGTAGAACATAGGAACAGTCAGAGGGAGAACAGCCAACCTCATCAGATCGGAAGAGCGGTTTCAG    |
| chr17 | 48267284  | 48267323  | COL1A1_7397 | + | GTGACCTATGCACCAGACGTGCACAGAGGCATCAAGCCTGGACCCGCTCTGGGTCCCAGCAGATCGGAAGAGCGGTTTCAG     |
| chr17 | 48267480  | 48267519  | COL1A1_7398 | + | GTGACCTATGCACCAGACGTAAAGCAGGGCGTGAATGGAGGGAAGGAGGCAGGAGTTCCAGATCGGAAGAGCGGTTTCAG      |
| chr17 | 48267752  | 48267791  | COL1A1_7399 | + | GTGACCTATGCACCAGACGTAGGAGTCAGATGGAGAGTGCCTGACAGAGGGGAAGGCAGATCGGAAGAGCGGTTTCAG        |
| chr17 | 48267968  | 48268007  | COL1A1_7400 | + | GTGACCTATGCACCAGACGTGGGACAAGAGGCTCAGGCTCAGGGCTCCCTGAACTCAGATCGGAAGAGCGGTTTCAG         |
| chr17 | 48268296  | 48268335  | COL1A1_7401 | + | GTGACCTATGCACCAGACGTGGATAAGCTTGAATTTCCAGTGTGGGCAAGGAGTGCACAGATCGGAAGAGCGGTTTCAG       |
| chr17 | 48268862  | 48268901  | COL1A1_7402 | + | GTGACCTATGCACCAGACGTACCAAGAAGACTGGAGTGAGGCCCTGGGGCCCAAGAGTGAGATCGGAAGAGCGGTTTCAG      |
| chr17 | 48269258  | 48269297  | COL1A1_7403 | + | GTGACCTATGCACCAGACGTAGGACAGGGCATGTGAAGGCTGCTCTGGAGATAGGGCCAAAGATCGGAAGAGCGGTTTCAG     |
| chr17 | 48269396  | 48269435  | COL1A1_7404 | + | GTGACCTATGCACCAGACGTGGGAGAGAGGAACAGACAGTGAGCAAAACCCACCTGGGGCAGATCGGAAGAGCGGTTTCAG     |
| chr17 | 48269900  | 48269939  | COL1A1_7405 | + | GTGACCTATGCACCAGACGTGAAATGGGGGAAGAAGGGAGGGAAAGGTTTGAATCTGGAAAGATCGGAAGAGCGGTTTCAG     |
| chr17 | 48270065  | 48270104  | COL1A1_7406 | + | GTGACCTATGCACCAGACGTAGAACACTACAGTCAAGGGGAGGCCGAGGAGCAGGGCCAGATCGGAAGAGCGGTTTCAG       |
| chr17 | 48270222  | 48270261  | COL1A1_7407 | + | GTGACCTATGCACCAGACGTATAGCAAAGGGGCAAGCTAGGGTTAGGAGGCCCCGAGCAGCAGATCGGAAGAGCGGTTTCAG    |
| chr17 | 48270419  | 48270458  | COL1A1_7408 | + | GTGACCTATGCACCAGACGTAGGGAGTTAGGGTTGAGGGGGCTGAAGTGAGAAAGCCAGGGAGATCGGAAGAGCGGTTTCAG    |
| chr17 | 48271413  | 48271452  | COL1A1_7409 | + | GTGACCTATGCACCAGACGTGAGGCACGAAAGCAGCAGTGGAGACAGCAGGGAGGCAGACAGATCGGAAGAGCGGTTTCAG     |
| chr17 | 48271555  | 48271594  | COL1A1_7410 | + | GTGACCTATGCACCAGACGTAGAGAGGTATGAGTGGGACTTTGGGGAAGAGCATGATGGAGAGATCGGAAGAGCGGTTTCAG    |
| chr17 | 48271819  | 48271858  | COL1A1_7411 | + | GTGACCTATGCACCAGACGTGAAGTCAACAGGAACAGTTAGGGCTCAAGTTTGTGGCTTAGATCGGAAGAGCGGTTTCAG      |
| chr17 | 48271998  | 48272037  | COL1A1_7412 | + | GTGACCTATGCACCAGACGTAGAGGAGGCCAGTGAAGCTCGGACAGGCACAGCCACCGATCGGAAGAGCGGTTTCAG         |
| chr17 | 48272200  | 48272239  | COL1A1_7413 | + | GTGACCTATGCACCAGACGTCCGAGAGGAGGAGGCGCCCTGTGGTGAGGGGCCATCTGATAGATCGGAAGAGCGGTTTCAG     |
| chr17 | 48272472  | 48272511  | COL1A1_7414 | + | GTGACCTATGCACCAGACGTGGAGAAGAGGATGAGCTGAGAGTCGGGGGCGCTCAGTTGGAGATCGGAAGAGCGGTTTCAG     |
| chr17 | 48272702  | 48272741  | COL1A1_7415 | + | GTGACCTATGCACCAGACGTGAGACAGCCAGGGCGTGAGCCTAGGAGCAGAGGGAAAGGGAGATCGGAAGAGCGGTTTCAG     |
| chr17 | 48272850  | 48272889  | COL1A1_7416 | + | GTGACCTATGCACCAGACGTGAGAAAGGAGTGTCAAGCAACAGGCAAGGACTCTGAGGTTAAGATCGGAAGAGCGGTTTCAG    |
| chr17 | 48273037  | 48273076  | COL1A1_7417 | + | GTGACCTATGCACCAGACGTAGAAGAGCATATCAGAAGCCACCCTGGGAAACCACTTAGATCGGAAGAGCGGTTTCAG        |
| chr17 | 48273348  | 48273387  | COL1A1_7418 | + | GTGACCTATGCACCAGACGTAAATGGAGATGTCAGCGAGAAAGAGATGGCAGTGCAAAAGATCGGAAGAGCGGTTTCAG       |
| chr17 | 48273571  | 48273610  | COL1A1_7419 | + | GTGACCTATGCACCAGACGTGAGGGGAAGCCCGTTAAGTCCACTGAGCACTGGCCAGTCAGATCGGAAGAGCGGTTTCAG      |
| chr17 | 48273739  | 48273778  | COL1A1_7420 | + | GTGACCTATGCACCAGACGTAAACAAAGAGAAGTCAGATGAGATGGAGACAGCCTTGTTCAGATCGGAAGAGCGGTTTCAG     |
| chr17 | 48273900  | 48273939  | COL1A1_7421 | + | GTGACCTATGCACCAGACGTGAGAAATAATGAGTGAGAAATTCATTCATGGTGGGACTCTGAGATCGGAAGAGCGGTTTCAG    |
| chr17 | 48274042  | 48274081  | COL1A1_7422 | + | GTGACCTATGCACCAGACGTAAAGAGGTAGAAGTGAAGAACCTGTGGAGGGGGTGAACAAGATCGGAAGAGCGGTTTCAG      |
| chr17 | 48274435  | 48274474  | COL1A1_7423 | + | GTGACCTATGCACCAGACGTATGAAAGAAGACAAGGAAAGGCCCTAGTAACACATCAGCTAGATCGGAAGAGCGGTTTCAG     |
| chr17 | 48274605  | 48274644  | COL1A1_7424 | + | GTGACCTATGCACCAGACGTGAGAAAAAGCATCATGCCTTGCTCCACCACCCTAGATCGGAAGAGCGGTTTCAG            |



|       |           |           |             |   |                                                                                     |
|-------|-----------|-----------|-------------|---|-------------------------------------------------------------------------------------|
| chr17 | 48275157  | 48275196  | COL1A1_7425 | + | GTGACCTATGCACCAGACGTTAGAAGAGGTGGTTAGAATATGGATAAGAAAAAGAAGGAGATCGGAAGAGCGGTTTCAG     |
| chr17 | 48275374  | 48275413  | COL1A1_7426 | + | GTGACCTATGCACCAGACGTAGGAAAAAGATGGGTAGAAGACAAGTCCTGTCAACCTTAGATCGGAAGAGCGGTTTCAG     |
| chr17 | 48275577  | 48275616  | COL1A1_7427 | + | GTGACCTATGCACCAGACGTAGAAGAAAGGGGGTTCATGGTATCCCTCTGTAGGAAAGCAGATCGGAAGAGCGGTTTCAG    |
| chr17 | 48275876  | 48275915  | COL1A1_7428 | + | GTGACCTATGCACCAGACGTCAAGAGAAGTCAGAGTGAGGACAGTGAATTGAAAGGCAGAAGATCGGAAGAGCGGTTTCAG   |
| chr17 | 48276699  | 48276738  | COL1A1_7429 | + | GTGACCTATGCACCAGACGTAGAGGGCGGGCCGGGGTGAAGCGTGGGCGCCGAGAGCCATGAGATCGGAAGAGCGGTTTCAG  |
| chr17 | 48276825  | 48276864  | COL1A1_7430 | + | GTGACCTATGCACCAGACGTGGGGGAGAAGAAACAAGAGCCACAGTTAGAGAAGGGGGAAGATCGGAAGAGCGGTTTCAG    |
| chr17 | 48276962  | 48277001  | COL1A1_7431 | + | GTGACCTATGCACCAGACGTAAAGACAGCCGCTTAGAGCCAAAGTTTTGCTAATGCTCAGATCGGAAGAGCGGTTTCAG     |
| chr17 | 48277319  | 48277358  | COL1A1_7432 | + | GTGACCTATGCACCAGACGTGGAAGAGGGGCGCTTGTGACTAGTACTGCAACCCCCAGCAGATCGGAAGAGCGGTTTCAG    |
| chr17 | 48278885  | 48278924  | COL1A1_7433 | + | GTGACCTATGCACCAGACGTTAGACATGTAGACTCTTTGTTGGCTGGGGAGGGGTTAGCGAGATCGGAAGAGCGGTTTCAG   |
| chr3  | 168802842 | 168802881 | MECOM_7434  | + | GTGACCTATGCACCAGACGTAAAGGAGAGACTCAGTAAATGGCATTGAAAAACATCACAGATCGGAAGAGCGGTTTCAG     |
| chr3  | 168806982 | 168807021 | MECOM_7435  | + | GTGACCTATGCACCAGACGTCCAACGAAAAACACAGAAATTTCTTTTTCATTTGTTATCTAGATCGGAAGAGCGGTTTCAG   |
| chr3  | 168808035 | 168808074 | MECOM_7436  | + | GTGACCTATGCACCAGACGTCAAAAAAAAGTCCAAATTTGTTGGTTTCATTTTAAAAAGATCGGAAGAGCGGTTTCAG      |
| chr3  | 168810901 | 168810940 | MECOM_7437  | + | GTGACCTATGCACCAGACGTGCAAAAGCCCTTTATGACAAAAGATTATTGTTTTATCTAGCAAGATCGGAAGAGCGGTTTCAG |
| chr3  | 168813044 | 168813083 | MECOM_7438  | + | GTGACCTATGCACCAGACGTAAACAAGAGAAAAATATTAGCAAGCACATTAAGAGTTTATGATCGGAAGAGCGGTTTCAG    |
| chr3  | 168818761 | 168818800 | MECOM_7439  | + | GTGACCTATGCACCAGACGTAAAGATGTTATAAGAGAAAAGTCAGCACAGTTGACTATATTAGATCGGAAGAGCGGTTTCAG  |
| chr3  | 168820025 | 168820064 | MECOM_7440  | + | GTGACCTATGCACCAGACGTAAAGCACAAAGCCATGAAGCGTTTGGCATTCTTCTTAAGATCGGAAGAGCGGTTTCAG      |
| chr3  | 168825751 | 168825790 | MECOM_7441  | + | GTGACCTATGCACCAGACGTAATTAACAAAAACAAAAATTTACTTCTGTGTTGGTATCAGATCGGAAGAGCGGTTTCAG     |
| chr3  | 168830673 | 168830712 | MECOM_7442  | + | GTGACCTATGCACCAGACGTAAAATATAGATTTGGAGATGAAGCAGTCTCACATATCAATAGATCGGAAGAGCGGTTTCAG   |
| chr3  | 168834538 | 168834577 | MECOM_7443  | + | GTGACCTATGCACCAGACGTACAACAAAAAAGATCTCAGGCTTATGTCAAATTGCTTCTAGATCGGAAGAGCGGTTTCAG    |
| chr3  | 168839008 | 168839047 | MECOM_7444  | + | GTGACCTATGCACCAGACGTATGAGTACTGATTAAATCAAGAACTTAACTCAAGGGCACAAAGATCGGAAGAGCGGTTTCAG  |
| chr3  | 168840526 | 168840565 | MECOM_7445  | + | GTGACCTATGCACCAGACGTAAACAATAGATTTAAAAAGACAAAGATGCATTATAAAGAGATCGGAAGAGCGGTTTCAG     |
| chr3  | 168845859 | 168845898 | MECOM_7446  | + | GTGACCTATGCACCAGACGTAATTCAGGTGTTAGGATTGGGTGGTCAGGAATTGCCATCAAGATCGGAAGAGCGGTTTCAG   |
| chr3  | 168849276 | 168849315 | MECOM_7447  | + | GTGACCTATGCACCAGACGTAGCTCTCTCCGGCCCAATGCTGCAACTACTCTATAGAAGATCGGAAGAGCGGTTTCAG      |
| chr3  | 168833633 | 168833672 | MECOM_7448  | + | GTGACCTATGCACCAGACGTGTTGAACCAAGTCTTTCAGCAATAAGCAATAGCTAGATCGGAAGAGCGGTTTCAG         |
| chr3  | 168834085 | 168834124 | MECOM_7449  | + | GTGACCTATGCACCAGACGTTTGACTTTTGTCTGTTTCTGTTGACTACTGATAGTCTTTAAGATCGGAAGAGCGGTTTCAG   |
| chr17 | 11924329  | 11924368  | MAP2K4_7450 | + | GTGACCTATGCACCAGACGTGCGCCGCGCCGAGATCCCAGCCCCCTAGCGCGCAACCCGAGATCGGAAGAGCGGTTTCAG    |
| chr17 | 11958319  | 11958358  | MAP2K4_7451 | + | GTGACCTATGCACCAGACGTTTGGTAATCAAAGGCTCAACTCAAGCAAGATTTTAAAGTAGATCGGAAGAGCGGTTTCAG    |
| chr17 | 11984858  | 11984897  | MAP2K4_7452 | + | GTGACCTATGCACCAGACGTCCATGATTATTTTTGGTACTTTAATCCATTAGGATGAAATTAGATCGGAAGAGCGGTTTCAG  |
| chr17 | 11999022  | 11999061  | MAP2K4_7453 | + | GTGACCTATGCACCAGACGTACTGGTTTTAGCTGACTAATGAATTAATTTGGACAAAGATCGGAAGAGCGGTTTCAG       |
| chr17 | 12011237  | 12011276  | MAP2K4_7454 | + | GTGACCTATGCACCAGACGTGGTCTTTAAATTTATCTGTTGTATATAGTTATATAGAGAAGATCGGAAGAGCGGTTTCAG    |
| chr17 | 12013754  | 12013793  | MAP2K4_7455 | + | GTGACCTATGCACCAGACGTATTTGGTATTTTTGTAATAGAAATTAACTTTTTTCTCCTAAGATCGGAAGAGCGGTTTCAG   |
| chr17 | 12016688  | 12016727  | MAP2K4_7456 | + | GTGACCTATGCACCAGACGTAGTCCAGGCCCTTTGCTTGTATAGTATTGCACAGAGAGCAGATCGGAAGAGCGGTTTCAG    |
| chr17 | 12028699  | 12028738  | MAP2K4_7457 | + | GTGACCTATGCACCAGACGTGCTGATTCAACCTTGCCACAGTAGCGTAACAATAAGAAATAGATCGGAAGAGCGGTTTCAG   |
| chr17 | 12032615  | 12032654  | MAP2K4_7458 | + | GTGACCTATGCACCAGACGTGATTATGATGGTGGCAACAGCATGCGGCAAGAATAGTGAAGATCGGAAGAGCGGTTTCAG    |
| chr17 | 12043212  | 12043251  | MAP2K4_7459 | + | GTGACCTATGCACCAGACGTGACTGTGGGATTGTAGGTACTCCTAACCAGGACTGATCGGAAGAGCGGTTTCAG          |
| chr17 | 12044588  | 12044627  | MAP2K4_7460 | + | GTGACCTATGCACCAGACGTACATCAGACTCTAGAAAAAGGGCTGAGAGGAAGCAAGACAGATCGGAAGAGCGGTTTCAG    |
| chr22 | 39621863  | 39621902  | PDGFB_7461  | + | GTGACCTATGCACCAGACGTAAAAAGAACCTCGTCAGCATGTGGACCATTGGGGAGGTAGATCGGAAGAGCGGTTTCAG     |
| chr22 | 39626244  | 39626283  | PDGFB_7462  | + | GTGACCTATGCACCAGACGTGAGCCACAATAATGCCTCTGTAGAGACCACACAGCCAGGAGAGATCGGAAGAGCGGTTTCAG  |
| chr22 | 39627843  | 39627882  | PDGFB_7463  | + | GTGACCTATGCACCAGACGTACGAAACCTGGGTCAGGAGCGTAGGCCCTGCCAGATCGGAAGAGCGGTTTCAG           |
| chr22 | 39629540  | 39629579  | PDGFB_7464  | + | GTGACCTATGCACCAGACGTAGTACAGTCAGACACAGCCAGCCACCTTGGGCAGGAGATCGGAAGAGCGGTTTCAG        |
| chr22 | 39631890  | 39631929  | PDGFB_7465  | + | GTGACCTATGCACCAGACGTGACACAAAAAGGCTGAGTGGAGTGGGAGTGGGGCTTTCCAGATCGGAAGAGCGGTTTCAG    |
| chr3  | 30648480  | 30648519  | TGFBR2_7466 | + | GTGACCTATGCACCAGACGTCCCAGCCGGGCTCGGCCGGGGCGCCGGGGTCTTCTGGGAGATCGGAAGAGCGGTTTCAG     |
| chr3  | 30664776  | 30664815  | TGFBR2_7467 | + | GTGACCTATGCACCAGACGTATTAATTAATCTTTTCATCATTTTTCTATTTTGTATGATCGGAAGAGCGGTTTCAG        |
| chr3  | 30686418  | 30686457  | TGFBR2_7468 | + | GTGACCTATGCACCAGACGTCTTTAAGAAGTTATCTTTCTTTTCCCTTTTTACATAAAGATCGGAAGAGCGGTTTCAG      |
| chr3  | 30691963  | 30692002  | TGFBR2_7469 | + | GTGACCTATGCACCAGACGTTTTCTCTTAAGGGTGTGGGACCTGAGATCTGTGCCAATTTAGATCGGAAGAGCGGTTTCAG   |
| chr3  | 30713940  | 30713979  | TGFBR2_7470 | + | GTGACCTATGCACCAGACGTGCTAGTGTAGTCCCTTACCTTGAAGCTGACCACAGATCGGAAGAGCGGTTTCAG          |
| chr3  | 30715749  | 30715788  | TGFBR2_7471 | + | GTGACCTATGCACCAGACGTACCAGCATCATTGTGTAGTGGTAAACTTGTCTTCAAAATAAGATCGGAAGAGCGGTTTCAG   |
| chr3  | 30730014  | 30730053  | TGFBR2_7472 | + | GTGACCTATGCACCAGACGTAGTGTTTACAAAGGTGAGTAAAGATTCAACCAAGTTGCCTCAGATCGGAAGAGCGGTTTCAG  |
| chr3  | 30733102  | 30733141  | TGFBR2_7473 | + | GTGACCTATGCACCAGACGTGCAGGCTGGGCCATGTCCAAAGAGGCTGCCCTCTCACAAGATCGGAAGAGCGGTTTCAG     |
| chr3  | 30713540  | 30713579  | TGFBR2_7474 | + | GTGACCTATGCACCAGACGTACAGAGAAGGACATCTTCTCAGACATCAATCTGAAGCATGAGATCGGAAGAGCGGTTTCAG   |
| chr7  | 98479658  | 98479697  | TRRAP_7475  | + | GTGACCTATGCACCAGACGTTATATTTTTCTATTTTCTATTTTGTAGGTAATATTCTATTAGATCGGAAGAGCGGTTTCAG   |
| chr7  | 98488079  | 98488118  | TRRAP_7476  | + | GTGACCTATGCACCAGACGTAAAATAACATGAAAGACAAGGCTGCTGGGATTTGACAGATCGGAAGAGCGGTTTCAG       |
| chr7  | 98490162  | 98490201  | TRRAP_7477  | + | GTGACCTATGCACCAGACGTAGAATTAATCTTGTGCTATAGCCGATGTAAAACTTTCAAGATCGGAAGAGCGGTTTCAG     |
| chr7  | 98491515  | 98491554  | TRRAP_7478  | + | GTGACCTATGCACCAGACGTTAAAATCCTTATAGCATTATAAAGTGTGTCACATGTTTCAGATCGGAAGAGCGGTTTCAG    |
| chr7  | 98493454  | 98493493  | TRRAP_7479  | + | GTGACCTATGCACCAGACGTACTTGGTTTTAATTAGTTACATTTGTTTATACTCCTTAAGATCGGAAGAGCGGTTTCAG     |
| chr7  | 98495500  | 98495539  | TRRAP_7480  | + | GTGACCTATGCACCAGACGTCGCTGAGTTATTTACCCTGGCTCCTGCTAGTTTCGGATAGATCGGAAGAGCGGTTTCAG     |
| chr7  | 98497133  | 98497172  | TRRAP_7481  | + | GTGACCTATGCACCAGACGTGCTCATTAGTCTCTTGGGTTTTGGGCTTCTATAAGAAAAGATCGGAAGAGCGGTTTCAG     |
| chr7  | 98497401  | 98497440  | TRRAP_7482  | + | GTGACCTATGCACCAGACGTACTGATCCGGCTGCCACAGTGCCTGGATTCCAAGTAAAAGATCGGAAGAGCGGTTTCAG     |

|      |           |           |            |   |                                                                                     |
|------|-----------|-----------|------------|---|-------------------------------------------------------------------------------------|
| chr7 | 98501151  | 98501190  | TRRAP_7483 | + | GTGACCTATGCACCAGACGTCCTGTCTTGTCTTGAATGCTGATGCTAGTCCCTGTGGCCATAGATCGGAAGAGCGGTTTCAG  |
| chr7 | 98503889  | 98503928  | TRRAP_7484 | + | GTGACCTATGCACCAGACGTTAAACCAGTGATATCTGGTTGGTTAAATGCCAGGAGCATCAAGATCGGAAGAGCGGTTTCAG  |
| chr7 | 98506596  | 98506635  | TRRAP_7485 | + | GTGACCTATGCACCAGACGTTTCTGAGAGTATCATCCATCCTGCACCTCTATCCTGTTTGATAGATCGGAAGAGCGGTTTCAG |
| chr7 | 98508053  | 98508092  | TRRAP_7486 | + | GTGACCTATGCACCAGACGTTCTCAGTTATGTAGACAAACAATAGTTTTCATAAAGTGAAGATCGGAAGAGCGGTTTCAG    |
| chr7 | 98508241  | 98508280  | TRRAP_7487 | + | GTGACCTATGCACCAGACGTGCCCTCCAGCCAGGCTTTCGCATATGAAAGTACTCTTAAGATCGGAAGAGCGGTTTCAG     |
| chr7 | 98508905  | 98508944  | TRRAP_7488 | + | GTGACCTATGCACCAGACGTCCTTTTTATGTGTTGTTGAACATTACAATCTTTTGTTAAGATCGGAAGAGCGGTTTCAG     |
| chr7 | 98513522  | 98513561  | TRRAP_7489 | + | GTGACCTATGCACCAGACGTTGACTTTGGTTGCTTTTGTAGTCTTGTGTCTATGTAGTCCGGAAGAGCGGTTTCAG        |
| chr7 | 98515313  | 98515352  | TRRAP_7490 | + | GTGACCTATGCACCAGACGTAGTGAGGTTGTTAGCTGGCTGCTTCCCTGGAAGCAGTGGGAGATCGGAAGAGCGGTTTCAG   |
| chr7 | 98519587  | 98519626  | TRRAP_7491 | + | GTGACCTATGCACCAGACGTTGACAATGTCGTTTCGTTTAAAGCCTTGTGAAGATACTATAGATCGGAAGAGCGGTTTCAG   |
| chr7 | 98522897  | 98522936  | TRRAP_7492 | + | GTGACCTATGCACCAGACGTCACCTTCCTTCTGTGTGGTTGGGTGGATCCTGTTTTAGAAAGATCGGAAGAGCGGTTTCAG   |
| chr7 | 98525000  | 98525039  | TRRAP_7493 | + | GTGACCTATGCACCAGACGTGGGCACGGTGGGGCACGGGATTGGTTCTTTGACTTTTATAAGATCGGAAGAGCGGTTTCAG   |
| chr7 | 98527840  | 98527879  | TRRAP_7494 | + | GTGACCTATGCACCAGACGTTGTTGAGGAGTGTCTTCTGATTTGGAGGGTGTCTGTACCTGAGATCGGAAGAGCGGTTTCAG  |
| chr7 | 98528464  | 98528503  | TRRAP_7495 | + | GTGACCTATGCACCAGACGTGGTGGCCCCAAACCTTAACCATGCTGTTTTTAAATGGTTGGAGATCGGAAGAGCGGTTTCAG  |
| chr7 | 98529299  | 98529338  | TRRAP_7496 | + | GTGACCTATGCACCAGACGTTGTACCAGAACCAAGGTAATTTCAACAAAACCTTTTGAGCAGATCGGAAGAGCGGTTTCAG   |
| chr7 | 98531036  | 98531075  | TRRAP_7497 | + | GTGACCTATGCACCAGACGTGGTGGTGGGAGTGGTGTGGATGGTGTGATGACGTGTGTCTGAGATCGGAAGAGCGGTTTCAG  |
| chr7 | 98533309  | 98533348  | TRRAP_7498 | + | GTGACCTATGCACCAGACGTGAAAATCTACGGGGTATAAAAGTGAAGAGGAGACTGACCACAGATCGGAAGAGCGGTTTCAG  |
| chr7 | 98540651  | 98540690  | TRRAP_7499 | + | GTGACCTATGCACCAGACGTTGTTGTGTTCTGGGAAGGGCACCCAGCCCATGCTGGTCCAGATCGGAAGAGCGGTTTCAG    |
| chr7 | 98545974  | 98546013  | TRRAP_7500 | + | GTGACCTATGCACCAGACGTTAGTGAAGGCTGCTTCCGCTTCCGCTGTCACCTGCCAGTCTTAGATCGGAAGAGCGGTTTCAG |
| chr7 | 98546319  | 98546358  | TRRAP_7501 | + | GTGACCTATGCACCAGACGTTGACGAGCTGGAGTACAGGGTCCCTTCAAATGCTTGTGAGAGATCGGAAGAGCGGTTTCAG   |
| chr7 | 98547215  | 98547254  | TRRAP_7502 | + | GTGACCTATGCACCAGACGTTTCTCCAGCCCCAATGCCAGGGGTTAATCGAGACACAGATCGGAAGAGCGGTTTCAG       |
| chr7 | 98547475  | 98547514  | TRRAP_7503 | + | GTGACCTATGCACCAGACGTCCTCCCGCCCTGCCCGCGGGACTGGCTCTGTCCAAAAGAGATCGGAAGAGCGGTTTCAG     |
| chr7 | 98547896  | 98547935  | TRRAP_7504 | + | GTGACCTATGCACCAGACGTCCTTATGCTGTAGAAGGGTATGGGATTTGGTCTGGTTAGATCGGAAGAGCGGTTTCAG      |
| chr7 | 98548638  | 98548677  | TRRAP_7505 | + | GTGACCTATGCACCAGACGTTATGTGTGGTGTGAGAAGTAGCCGTCGATGGATGAAGATCGGAAGAGCGGTTTCAG        |
| chr7 | 98551067  | 98551106  | TRRAP_7506 | + | GTGACCTATGCACCAGACGTGGCTCCCTGCTGTCCGCCACATCAGCGTGAATCTCACATGAGATCGGAAGAGCGGTTTCAG   |
| chr7 | 98552938  | 98552977  | TRRAP_7507 | + | GTGACCTATGCACCAGACGTGGGACGGTGGGCTGCCGGCGCGCGTCTTACGGCATTACAGATCGGAAGAGCGGTTTCAG     |
| chr7 | 98553938  | 98553977  | TRRAP_7508 | + | GTGACCTATGCACCAGACGTCAGCCTCAGGGGTGCCCGGATGCTTCTCTTACTTCTCAGATCGGAAGAGCGGTTTCAG      |
| chr7 | 98554167  | 98554206  | TRRAP_7509 | + | GTGACCTATGCACCAGACGTGTGCCCTCTGTATGGGTGCTGCGCATTCTGCTGGGAGTTGGAGATCGGAAGAGCGGTTTCAG  |
| chr7 | 98555725  | 98555764  | TRRAP_7510 | + | GTGACCTATGCACCAGACGTCAAGTCCCTGCGTTAGGCTTCTGACAGCCAGAGGCTACAGATCGGAAGAGCGGTTTCAG     |
| chr7 | 98557124  | 98557163  | TRRAP_7511 | + | GTGACCTATGCACCAGACGTTGTCTGAAGGGCCAGGGCAGCCAGCCAGATCGGAAGAGCGGTTTCAG                 |
| chr7 | 98559108  | 98559147  | TRRAP_7512 | + | GTGACCTATGCACCAGACGTTTTCCACGGGTGCTTTTCTTCAAAGTGGACGGTGGCCGAGATCGGAAGAGCGGTTTCAG     |
| chr7 | 98560061  | 98560100  | TRRAP_7513 | + | GTGACCTATGCACCAGACGTGTCTGTCTGCTGGTGTGCTGGTGGCTCAGTTTGGCCTCTTATAGATCGGAAGAGCGGTTTCAG |
| chr7 | 98562409  | 98562448  | TRRAP_7514 | + | GTGACCTATGCACCAGACGTGGCCACCGGGGGCTTTCTCAGACTCTGTTGAACAGAGAAGATCGGAAGAGCGGTTTCAG     |
| chr7 | 98563529  | 98563568  | TRRAP_7515 | + | GTGACCTATGCACCAGACGTACGGTGTGCCATGTGATCTCCCTTTCAATAAAAGAAAATTAGATCGGAAGAGCGGTTTCAG   |
| chr7 | 98564796  | 98564835  | TRRAP_7516 | + | GTGACCTATGCACCAGACGTTCAATTAATCAAGTACTACATATATGGTCTTAAATGTGCTATAGATCGGAAGAGCGGTTTCAG |
| chr7 | 98565332  | 98565371  | TRRAP_7517 | + | GTGACCTATGCACCAGACGTTCCGGCTCACATCTGTCCCGGGGGCAGCTGTGGGTTTCTAGATCGGAAGAGCGGTTTCAG    |
| chr7 | 98567925  | 98567964  | TRRAP_7518 | + | GTGACCTATGCACCAGACGTGCACCCACAGGCAGAATCCCAGAGAGGAGGTGAGGCCCCAGATCGGAAGAGCGGTTTCAG    |
| chr7 | 98569579  | 98569618  | TRRAP_7519 | + | GTGACCTATGCACCAGACGTAGCTTGAAGAGGATTGCTTCTTCCATGGACAGTTAGATCGGAAGAGCGGTTTCAG         |
| chr7 | 98573902  | 98573941  | TRRAP_7520 | + | GTGACCTATGCACCAGACGCTTTTAAATCCTGTTTTGGAAAATTTGATGTTTGTAGCTTTTAGATCGGAAGAGCGGTTTCAG  |
| chr7 | 98574404  | 98574443  | TRRAP_7521 | + | GTGACCTATGCACCAGACGTGCCCTCAGTTTGTAAATACCTCTTCCCTGCCAGTGACTTCCAGATCGGAAGAGCGGTTTCAG  |
| chr7 | 98574710  | 98574749  | TRRAP_7522 | + | GTGACCTATGCACCAGACGTGACCACTGACGGTCTGGGTGTGTAATGAGAGGTCATTAAGATCGGAAGAGCGGTTTCAG     |
| chr7 | 98575957  | 98575996  | TRRAP_7523 | + | GTGACCTATGCACCAGACGTCACAGTGCTTGACGTGTCATGAATCAGTTAAGGGAAACCAAGATCGGAAGAGCGGTTTCAG   |
| chr7 | 98576538  | 98576577  | TRRAP_7524 | + | GTGACCTATGCACCAGACGTCGGGGGGCATCCCTGCCGCTGCCTGGTCCCTTTCTGAAGATCGGAAGAGCGGTTTCAG      |
| chr7 | 98579594  | 98579633  | TRRAP_7525 | + | GTGACCTATGCACCAGACGTTGCCCCATGCGAGCACAGGCTGTGGCCTGTGCGAGCCAAGATCGGAAGAGCGGTTTCAG     |
| chr7 | 98581992  | 98582031  | TRRAP_7526 | + | GTGACCTATGCACCAGACGTGACACTTGAAGAATGAGGCCAGGTGGAGATTGAGGCCAGGAGATCGGAAGAGCGGTTTCAG   |
| chr7 | 98582678  | 98582717  | TRRAP_7527 | + | GTGACCTATGCACCAGACGTTATATGAAAGGATAAGAGAAAAAATGCATCAGATTATTAGATCGGAAGAGCGGTTTCAG     |
| chr7 | 98586600  | 98586639  | TRRAP_7528 | + | GTGACCTATGCACCAGACGTTAAACAGCCTTTGACGAGGAAACCACTGTACCTTCAAGAAATCGGAAGAGCGGTTTCAG     |
| chr7 | 98588253  | 98588292  | TRRAP_7529 | + | GTGACCTATGCACCAGACGTGAGGGTGGCCTTGTTCACGTGCACAAAACATTGTGTCTTCCAGATCGGAAGAGCGGTTTCAG  |
| chr7 | 98589861  | 98589900  | TRRAP_7530 | + | GTGACCTATGCACCAGACGTTGGTGGGCGGTAGGCCAGGCCGGGAAGGGCTCATTCCAGAGATCGGAAGAGCGGTTTCAG    |
| chr7 | 98591371  | 98591410  | TRRAP_7531 | + | GTGACCTATGCACCAGACGTCGTATCTTGACATGGTGGCTCCTTGTAGAGGGGACGTGGAGATCGGAAGAGCGGTTTCAG    |
| chr7 | 98592482  | 98592521  | TRRAP_7532 | + | GTGACCTATGCACCAGACGTATTTTCTTCCCTTCCATAGGGAGAATGTGCACGCTGATAGATCGGAAGAGCGGTTTCAG     |
| chr7 | 98602049  | 98602088  | TRRAP_7533 | + | GTGACCTATGCACCAGACGTGACCTGGCAGTGGAACTAACCCAGCCGCCCCATGGACAAGATCGGAAGAGCGGTTTCAG     |
| chr7 | 98602982  | 98603021  | TRRAP_7534 | + | GTGACCTATGCACCAGACGTGAGCCACAGCTCGTGGGTACACAGGCAGCTTACAGGTGAGATCGGAAGAGCGGTTTCAG     |
| chr7 | 98606195  | 98606234  | TRRAP_7535 | + | GTGACCTATGCACCAGACGTGGCCGGCCGGGGCCGAGCTGCCGCTGCAGCCCTCTGAGATCGGAAGAGCGGTTTCAG       |
| chr7 | 98608889  | 98608928  | TRRAP_7536 | + | GTGACCTATGCACCAGACGTTTGAACAGCCAGATCCTCTCCTGTGACATCGCCTTTCTGAGATCGGAAGAGCGGTTTCAG    |
| chr7 | 98609169  | 98609208  | TRRAP_7537 | + | GTGACCTATGCACCAGACGTACGTCGTCCTATCACAGCGCAGGCTAGAGCCACTCAGATAGATCGGAAGAGCGGTTTCAG    |
| chr7 | 98609989  | 98610028  | TRRAP_7538 | + | GTGACCTATGCACCAGACGTACCGCCACCCGGAATGTGAAGGGCGCTCCGGGCTCTGAGATCGGAAGAGCGGTTTCAG      |
| chr4 | 110834629 | 110834668 | EGF_7539   | + | GTGACCTATGCACCAGACGTTCAATGAAAAGTGCTTCCGAGGCTCCGCGAAAAGCTGCCCAAGATCGGAAGAGCGGTTTCAG  |
| chr4 | 110862312 | 110862351 | EGF_7540   | + | GTGACCTATGCACCAGACGTTTACACTAGTGTGTTGAGCTGTTTTGTACAGGCTGACAAAGATCGGAAGAGCGGTTTCAG    |

|       |           |           |           |   |                                                                                      |
|-------|-----------|-----------|-----------|---|--------------------------------------------------------------------------------------|
| chr4  | 110864602 | 110864641 | EGF_7541  | + | GTGACCTATGCACCAGACGTCTGTATTAGACATTGAAATATATTTACAAATCTAGTGAAGATCGGAAGAGCGGTTTCAG      |
| chr4  | 110865236 | 110865275 | EGF_7542  | + | GTGACCTATGCACCAGACGTCTCTTGGTATAAAAAATAAAACAATTGTCAATTTGAAGTCCACAGATCGGAAGAGCGGTTTCAG |
| chr4  | 110866442 | 110866481 | EGF_7543  | + | GTGACCTATGCACCAGACGTGTTGACCTTGCAGCGGCTGACACATAGTTCACCCATAGATCGGAAGAGCGGTTTCAG        |
| chr4  | 110880604 | 110880643 | EGF_7544  | + | GTGACCTATGCACCAGACGTGAAGTACTGTGAAGGTAATGGAAGAGTCGCTGCTTGAGGGAGATCGGAAGAGCGGTTTCAG    |
| chr4  | 110882156 | 110882195 | EGF_7545  | + | GTGACCTATGCACCAGACGTGCAACAAGTATTATTGTCATTAGTTTTCTTCATTTTCAATAGATCGGAAGAGCGGTTTCAG    |
| chr4  | 110883152 | 110883191 | EGF_7546  | + | GTGACCTATGCACCAGACGTGGTTGCTTATTACCTTTTGTGTTTGAACAATACATTAGATCGGAAGAGCGGTTTCAG        |
| chr4  | 110884465 | 110884504 | EGF_7547  | + | GTGACCTATGCACCAGACGTGGTTGCTGTGCAACTGTGTCCCTGAAAAAAATTCATGAAAAGATCGGAAGAGCGGTTTCAG    |
| chr4  | 110885704 | 110885743 | EGF_7548  | + | GTGACCTATGCACCAGACGTGTTACTTGAACAGATGTGGACATGCTTTAAGGACAGAGTAAGATCGGAAGAGCGGTTTCAG    |
| chr4  | 110890286 | 110890325 | EGF_7549  | + | GTGACCTATGCACCAGACGTGCTTCAGTTTTAAAGTGTGTGAGATGGGAGTATGATGGGATAGATCGGAAGAGCGGTTTCAG   |
| chr4  | 110895974 | 110896013 | EGF_7550  | + | GTGACCTATGCACCAGACGTGAAAAATAAGGCACTGCTCTGCAGAGGTCATGTGACAGTAGATCGGAAGAGCGGTTTCAG     |
| chr4  | 110897402 | 110897441 | EGF_7551  | + | GTGACCTATGCACCAGACGTGGGATGGGCGATTTTTCTTTGACTGAGTGTTTATGAGAGATCGGAAGAGCGGTTTCAG       |
| chr4  | 110901306 | 110901345 | EGF_7552  | + | GTGACCTATGCACCAGACGTGAGATGTACACAGTCTTTCTTGGCTGGAATCTGCAACTAGATCGGAAGAGCGGTTTCAG      |
| chr4  | 110902142 | 110902181 | EGF_7553  | + | GTGACCTATGCACCAGACGTAAATATGTGCAAAATTAACCTAACGTTGGCTCGAAAAACAGATCGGAAGAGCGGTTTCAG     |
| chr4  | 110904708 | 110904747 | EGF_7554  | + | GTGACCTATGCACCAGACGTCTAGTTCCTCAATATACCTTTGGTTCACACAGTTTCCATCAGATCGGAAGAGCGGTTTCAG    |
| chr4  | 110909027 | 110909066 | EGF_7555  | + | GTGACCTATGCACCAGACGTAGGGCAAAATCACATATTTGACAATACTGAACCAGAAACAGATCGGAAGAGCGGTTTCAG     |
| chr4  | 110909876 | 110909915 | EGF_7556  | + | GTGACCTATGCACCAGACGTACATGTGCTGGGGAGGAGGGCAGAGGCAGGCCCTCAGAAATAGATCGGAAGAGCGGTTTCAG   |
| chr4  | 110914536 | 110914575 | EGF_7557  | + | GTGACCTATGCACCAGACGTGGGTGGTCTACAGTGAAGGGAGGGGACTGGCTCGGGATAGATCGGAAGAGCGGTTTCAG      |
| chr4  | 110916047 | 110916086 | EGF_7558  | + | GTGACCTATGCACCAGACGTGCTGCTGTGACTGTGCACAGGAGAGATGCTATTGATCCATAGATCGGAAGAGCGGTTTCAG    |
| chr4  | 110921013 | 110921052 | EGF_7559  | + | GTGACCTATGCACCAGACGTCTTTCTTTGGTACTGAAACCTCTTTCTAAGACCTCCCAAGATCGGAAGAGCGGTTTCAG      |
| chr4  | 110925789 | 110925828 | EGF_7560  | + | GTGACCTATGCACCAGACGTCAAAGCAGATGAAGCAAGGAATTGGCTTGATATTAACCCAGATCGGAAGAGCGGTTTCAG     |
| chr4  | 110929397 | 110929436 | EGF_7561  | + | GTGACCTATGCACCAGACGTATCCCTGGCTCCTGGTGAATGGTATTTTTACTTAGATCCAGATCGGAAGAGCGGTTTCAG     |
| chr4  | 110932622 | 110932661 | EGF_7562  | + | GTGACCTATGCACCAGACGTAAAAGGAAAGTCAAGAAGAATGAACATGTGCGATGCACAAGATCGGAAGAGCGGTTTCAG     |
| chr13 | 28578322  | 28578361  | FLT3_7563 | + | GTGACCTATGCACCAGACGTGAAAGAGACAGAACAATGATTACCATCTGATGTAGATGCAAGATCGGAAGAGCGGTTTCAG    |
| chr13 | 28588705  | 28588744  | FLT3_7564 | + | GTGACCTATGCACCAGACGTAAATGAAACAAGGAACAAGATCTGAAATGAAGCAAGATCGGAAGAGCGGTTTCAG          |
| chr13 | 28589404  | 28589443  | FLT3_7565 | + | GTGACCTATGCACCAGACGTCAATGACAATTGCAGCCATTATCCATTTCTTTCATTTGTAGATCGGAAGAGCGGTTTCAG     |
| chr13 | 28589849  | 28589888  | FLT3_7566 | + | GTGACCTATGCACCAGACGTCCCAGAGGAGATAAGATGGTGAATTTCCACATACAGACAAGATCGGAAGAGCGGTTTCAG     |
| chr13 | 28592737  | 28592776  | FLT3_7567 | + | GTGACCTATGCACCAGACGTGACACCAGAGTGTATTACTGTGATGTGATTATCTGAGATCGGAAGAGCGGTTTCAG         |
| chr13 | 28597625  | 28597664  | FLT3_7568 | + | GTGACCTATGCACCAGACGTGAGCCAGTCTTCACTTTTGCAAAAACTCAAGAAGTTGCCAGATCGGAAGAGCGGTTTCAG     |
| chr13 | 28599091  | 28599130  | FLT3_7569 | + | GTGACCTATGCACCAGACGTATTTGTTTTTCAATTTTACATTTCTTCTCAGCAGAAGATCGGAAGAGCGGTTTCAG         |
| chr13 | 28601389  | 28601428  | FLT3_7570 | + | GTGACCTATGCACCAGACGTACAGTTCAATTAATAGGCATACACAAAACCAACTGTTATAGATCGGAAGAGCGGTTTCAG     |
| chr13 | 28602436  | 28602475  | FLT3_7571 | + | GTGACCTATGCACCAGACGTAAAGAGCATTAAAAATGAAAACTCAAGTAAAATACGAATAGATCGGAAGAGCGGTTTCAG     |
| chr13 | 28608139  | 28608178  | FLT3_7572 | + | GTGACCTATGCACCAGACGTAAATGGTGAAGTACGTGCATTTAAAGATTTTCCAAATGGAAGATCGGAAGAGCGGTTTCAG    |
| chr13 | 28608362  | 28608401  | FLT3_7573 | + | GTGACCTATGCACCAGACGTGAAATGATGACTCAGTTAGGAATAGGCAGTTCTGCAGATAAGATCGGAAGAGCGGTTTCAG    |
| chr13 | 28608555  | 28608594  | FLT3_7574 | + | GTGACCTATGCACCAGACGTAGAGTGTCACTCAGCGATGAAACAGAATTCTGTGTGACAAGATCGGAAGAGCGGTTTCAG     |
| chr13 | 28609821  | 28609860  | FLT3_7575 | + | GTGACCTATGCACCAGACGTAAATAGTCAAAAGATTAGACAAGTGTGACTGTCATCAGATTAGATCGGAAGAGCGGTTTCAG   |
| chr13 | 28611436  | 28611475  | FLT3_7576 | + | GTGACCTATGCACCAGACGTAAAGAAATAAAGACAGATTTAGCCAAATGCTACAGGAGATAGATCGGAAGAGCGGTTTCAG    |
| chr13 | 28622591  | 28622630  | FLT3_7577 | + | GTGACCTATGCACCAGACGTAAATAGGCATTTATGAGTTAGTTAATAATTCATAGGGAAGATCGGAAGAGCGGTTTCAG      |
| chr13 | 28623685  | 28623724  | FLT3_7578 | + | GTGACCTATGCACCAGACGTATAAAACAGAGTTGCAATTAATGTTTTCAATCCAGACTAAGATCGGAAGAGCGGTTTCAG     |
| chr13 | 28623922  | 28623961  | FLT3_7579 | + | GTGACCTATGCACCAGACGTAAAAAGTCCCAAGTGAGAAAAAAAAGTATTTTTGCCTCAGATCGGAAGAGCGGTTTCAG      |
| chr13 | 28624370  | 28624409  | FLT3_7580 | + | GTGACCTATGCACCAGACGTAAAAAGATACCATTGGCTAAACAAGTTTAAAAATTAACAAGATCGGAAGAGCGGTTTCAG     |
| chr13 | 28626822  | 28626861  | FLT3_7581 | + | GTGACCTATGCACCAGACGTAAAGTTAATTAACATTTTACTATTTTAAAAATAATTCTCAGATCGGAAGAGCGGTTTCAG     |
| chr13 | 28631610  | 28631649  | FLT3_7582 | + | GTGACCTATGCACCAGACGTGGAAGAGAACTAGTTATTTTGGAAAAATGTGTGAAACTAAAGATCGGAAGAGCGGTTTCAG    |
| chr13 | 28636217  | 28636256  | FLT3_7583 | + | GTGACCTATGCACCAGACGTGATAGAACAAAGTGAATTCATGAAAACTGCAGGTCCTAAGGAGATCGGAAGAGCGGTTTCAG   |
| chr13 | 28644760  | 28644799  | FLT3_7584 | + | GTGACCTATGCACCAGACGTAAATAAAAAATGATAATGTTGATACATGCACACTTAAAAAAGATCGGAAGAGCGGTTTCAG    |
| chr13 | 28674658  | 28674697  | FLT3_7585 | + | GTGACCTATGCACCAGACGTGCCCCGGGTCCCCAGGCCCGCGCCGCGCCCTGCGATGAGATCGGAAGAGCGGTTTCAG       |
| chr17 | 73316645  | 73316684  | GRB2_7586 | + | GTGACCTATGCACCAGACGTGGAGCAGGAAAAACCCACATTCATTCTGGCTGTGACTAGATCGGAAGAGCGGTTTCAG       |
| chr17 | 73317919  | 73317958  | GRB2_7587 | + | GTGACCTATGCACCAGACGTGAGAAGACACATGTGACCCGCTAAAGGCTCTAATTGGCAGATCGGAAGAGCGGTTTCAG      |
| chr17 | 73322112  | 73322151  | GRB2_7588 | + | GTGACCTATGCACCAGACGTAAAGCAAGCTGGTCAACATCTGCTTCCCCACAAAGAAACAGATCGGAAGAGCGGTTTCAG     |
| chr17 | 73328889  | 73328928  | GRB2_7589 | + | GTGACCTATGCACCAGACGTATAAGACAACAAAAAACCATATTTTCTTTTCCCTTTAGATCGGAAGAGCGGTTTCAG        |
| chr17 | 73389720  | 73389759  | GRB2_7590 | + | GTGACCTATGCACCAGACGTGCTCAGTGTCTCAGCAGCTGAAGCAGGGGAAGGGAGTCTAGATCGGAAGAGCGGTTTCAG     |
| chr17 | 26084390  | 26084429  | NOS2_7591 | + | GTGACCTATGCACCAGACGTAAAAACAGAGCAGTCAAGTCCAGGCTGGGATGAGCAGATCGGAAGAGCGGTTTCAG         |
| chr17 | 26086112  | 26086151  | NOS2_7592 | + | GTGACCTATGCACCAGACGTAGGAACAAGTGGTGTGCTCAGCTCAGCTGCTCAGGACAAGGAGATCGGAAGAGCGGTTTCAG   |
| chr17 | 26087215  | 26087254  | NOS2_7593 | + | GTGACCTATGCACCAGACGTCCCCGGGCTGTTGTTACCATGTTGGCCACCAGAGGGCCCAAGATCGGAAGAGCGGTTTCAG    |
| chr17 | 26087781  | 26087820  | NOS2_7594 | + | GTGACCTATGCACCAGACGTGAGGAGAAGAGGGGCCAGTCTCAGACACCCAGGCCCAAGATCGGAAGAGCGGTTTCAG       |
| chr17 | 26088268  | 26088307  | NOS2_7595 | + | GTGACCTATGCACCAGACGTACCACAAAGTGACCAACGTCACCCCACTGCCATCGCAGCAAGATCGGAAGAGCGGTTTCAG    |
| chr17 | 26090042  | 26090081  | NOS2_7596 | + | GTGACCTATGCACCAGACGTAGGTTGATGTCAGTGACTCAGGGCCGCTGTCCCGCTTTGGAGATCGGAAGAGCGGTTTCAG    |
| chr17 | 26091181  | 26091220  | NOS2_7597 | + | GTGACCTATGCACCAGACGTAAAGGAAGTTCAGGATGAGAAAAGAGGCCCACTCAGGATAGATCGGAAGAGCGGTTTCAG     |
| chr17 | 26092753  | 26092792  | NOS2_7598 | + | GTGACCTATGCACCAGACGTAAAGCAAGCTCAGGTCAGGTCAGATTGACAGGATTTCTCCAGGAGATCGGAAGAGCGGTTTCAG |

|       |          |          |             |   |                                                                                      |
|-------|----------|----------|-------------|---|--------------------------------------------------------------------------------------|
| chr17 | 26093625 | 26093664 | NOS2_7599   | + | GTGACCTATGCACCAGACGTACACAGACGGTGAATGGCAAAGTGGTTCTTGAGCGTAGAGATCGGAAGAGCGGTTCCAG      |
| chr17 | 26094874 | 26094913 | NOS2_7600   | + | GTGACCTATGCACCAGACGTGTGGAGCAGACTGCGGTTAATGGTGACAGCAGCAGCATCAGATCGGAAGAGCGGTTCCAG     |
| chr17 | 26096188 | 26096227 | NOS2_7601   | + | GTGACCTATGCACCAGACGTACACACACAGACACATGTCCCATGCAAGCAGCACCTGGAGATCGGAAGAGCGGTTCCAG      |
| chr17 | 26096621 | 26096660 | NOS2_7602   | + | GTGACCTATGCACCAGACGTAGGGGATGACAGAGTTCTCAAGCCAGGATGAATAAAAACAAGATCGGAAGAGCGGTTCCAG    |
| chr17 | 26098054 | 26098093 | NOS2_7603   | + | GTGACCTATGCACCAGACGTCCCAAGTGGACATAGCCCTCGGCTCCAGTAGGGCCCTCAGATCGGAAGAGCGGTTCCAG      |
| chr17 | 26099489 | 26099528 | NOS2_7604   | + | GTGACCTATGCACCAGACGTAGACAGCAGGCGCGCTGTGTGCTGAGTCAGCCTTCCAAGATCGGAAGAGCGGTTCCAG       |
| chr17 | 26100280 | 26100319 | NOS2_7605   | + | GTGACCTATGCACCAGACGTGAAAGGAGATGTGAGGCGGGCTGGCTTGGCTAGATCGGAAGAGCGGTTCCAG             |
| chr17 | 26101488 | 26101527 | NOS2_7606   | + | GTGACCTATGCACCAGACGTAGGCAAGATAGGGAGTGGAGATAAGGGTGGGGGAATCAGGAGATCGGAAGAGCGGTTCCAG    |
| chr17 | 26105828 | 26105867 | NOS2_7607   | + | GTGACCTATGCACCAGACGTAGAGTGATAGCGGGCAGTCCGTCCCTGAAGCCACCCAGAGATCGGAAGAGCGGTTCCAG      |
| chr17 | 26107943 | 26107982 | NOS2_7608   | + | GTGACCTATGCACCAGACGTAGACGGGCCCTGTGAGTCTGTAAGCCGGGGCTCGGTGTCTAGATCGGAAGAGCGGTTCCAG    |
| chr17 | 26108214 | 26108253 | NOS2_7609   | + | GTGACCTATGCACCAGACGTCAAGAACAGTACTGTTTACCACCTAGCCCTGGTGGGGGCCAGATCGGAAGAGCGGTTCCAG    |
| chr17 | 26109143 | 26109182 | NOS2_7610   | + | GTGACCTATGCACCAGACGTCCATCCAGACCATGCCATCAAAGACTGGGTAGACAGAGGATCGGAAGAGCGGTTCCAG       |
| chr17 | 26110143 | 26110182 | NOS2_7611   | + | GTGACCTATGCACCAGACGTGGAAAGCAGCAGGAAGATGAACAATGAGATGGCCTTACATAGATCGGAAGAGCGGTTCCAG    |
| chr17 | 26114863 | 26114902 | NOS2_7612   | + | GTGACCTATGCACCAGACGTAGAGGCAGGTGGTGGGGTGGGCCATTCGGCTCTTGCCAAAGATCGGAAGAGCGGTTCCAG     |
| chr17 | 26115968 | 26116007 | NOS2_7613   | + | GTGACCTATGCACCAGACGTAAAAACAGGGTTTTCTCTCAGGTCTCTCTAGACCCAGAGATCGGAAGAGCGGTTCCAG       |
| chr17 | 26125846 | 26125885 | NOS2_7614   | + | GTGACCTATGCACCAGACGTTACAAAGCAGGTCACTTATGTCACCTATCTGGATTTGAGAGATCGGAAGAGCGGTTCCAG     |
| chr15 | 40453467 | 40453506 | BUB1B_7615  | + | GTGACCTATGCACCAGACGTGAAAGAGCTGCTGGGGCTGGCCCTGAGAGGCACGCGCTAGATCGGAAGAGCGGTTCCAG      |
| chr15 | 40457408 | 40457447 | BUB1B_7616  | + | GTGACCTATGCACCAGACGTGGCTGAGTCTCAACTGCTGCTTCACTTAAATGTTGAGATCGGAAGAGCGGTTCCAG         |
| chr15 | 40462333 | 40462372 | BUB1B_7617  | + | GTGACCTATGCACCAGACGTATTATTCACAAGACAATAGAAACATTAACAGATAAGTCCAGATCGGAAGAGCGGTTCCAG     |
| chr15 | 40462893 | 40462932 | BUB1B_7618  | + | GTGACCTATGCACCAGACGTCTCAAGTGCATCTGAGTTTTAAATATTAAC TAAGAGATAGATCGGAAGAGCGGTTCCAG     |
| chr15 | 40468885 | 40468924 | BUB1B_7619  | + | GTGACCTATGCACCAGACGTTTTGGAGCTTGTCTAACTCTAAAATAATAGAAATAATAGATCGGAAGAGCGGTTCCAG       |
| chr15 | 40476095 | 40476134 | BUB1B_7620  | + | GTGACCTATGCACCAGACGTAAACGTTATTTTCGGAAAAGCTGGATTCTTAGTGTTAAAAGATCGGAAGAGCGGTTCCAG     |
| chr15 | 40477591 | 40477630 | BUB1B_7621  | + | GTGACCTATGCACCAGACGTTTTAGATCCAGTCTTGTGCTGACACAACAAGACTTTCATATAGATCGGAAGAGCGGTTCCAG   |
| chr15 | 40477854 | 40477893 | BUB1B_7622  | + | GTGACCTATGCACCAGACGTTTTTGGATATTTTGAAGTGGAAATTTAAGGGTGGGCAAGATCGGAAGAGCGGTTCCAG       |
| chr15 | 40488986 | 40489025 | BUB1B_7623  | + | GTGACCTATGCACCAGACGTTCACAGTTTGTGAAAGGACTTAACTTAGTTGTGTAAGGAGATCGGAAGAGCGGTTCCAG      |
| chr15 | 40491939 | 40491978 | BUB1B_7624  | + | GTGACCTATGCACCAGACGTTTTTTTTCATACAAAACAGATAATTTATTGAAACAAATTTAGATCGGAAGAGCGGTTCCAG    |
| chr15 | 40492571 | 40492610 | BUB1B_7625  | + | GTGACCTATGCACCAGACGTATAGGTGGAAGGGACAATGCATATAGGAGGGCATTTGAAAGATCGGAAGAGCGGTTCCAG     |
| chr15 | 40493192 | 40493231 | BUB1B_7626  | + | GTGACCTATGCACCAGACGTTTTGACAGCCTTTGAGAAGAAGCTTGTCTGATAACAAATGTATAGATCGGAAGAGCGGTTCCAG |
| chr15 | 40494677 | 40494716 | BUB1B_7627  | + | GTGACCTATGCACCAGACGTTTTTTTGTCTTTTGGTTTTTACTTAAAGATTTCTGAGATCGGAAGAGCGGTTCCAG         |
| chr15 | 40494906 | 40494945 | BUB1B_7628  | + | GTGACCTATGCACCAGACGTGTATCCTTAAAGTTAATGTAATGGGCTAGTGGATTGTTAAGATCGGAAGAGCGGTTCCAG     |
| chr15 | 40498670 | 40498709 | BUB1B_7629  | + | GTGACCTATGCACCAGACGTATTTACAGGTTTTTACAACACAGATTGTTTACTCTCTTATTAGATCGGAAGAGCGGTTCCAG   |
| chr15 | 40500982 | 40501021 | BUB1B_7630  | + | GTGACCTATGCACCAGACGTCAACCACATATCCATGCCCTAGTGAACACTTGTTTATCTAGATCGGAAGAGCGGTTCCAG     |
| chr15 | 40501987 | 40502026 | BUB1B_7631  | + | GTGACCTATGCACCAGACGTTTGAACCTATGCTCTGGTTCATGACAGTATACAAATAAAGATCGGAAGAGCGGTTCCAG      |
| chr15 | 40502461 | 40502461 | BUB1B_7632  | + | GTGACCTATGCACCAGACGTTTCTTATAATTTCACTTACTTTGTAATAATACGGATTGAGATCGGAAGAGCGGTTCCAG      |
| chr15 | 40504860 | 40504899 | BUB1B_7633  | + | GTGACCTATGCACCAGACGTCTAAAAAACATAATTTAAAGCTTCTGAAATAGAGAGATTTGATAGATCGGAAGAGCGGTTCCAG |
| chr15 | 40505686 | 40505725 | BUB1B_7634  | + | GTGACCTATGCACCAGACGTTTTATTCTTATAATTTCTGCCAGCTGTCTCTTAAACATGGAGATCGGAAGAGCGGTTCCAG    |
| chr15 | 40509879 | 40509918 | BUB1B_7635  | + | GTGACCTATGCACCAGACGTAAACAAGCCTGAGCAATATGGAGAGGGTTTTCTTAATCTCTAGATCGGAAGAGCGGTTCCAG   |
| chr15 | 40510774 | 40510813 | BUB1B_7636  | + | GTGACCTATGCACCAGACGTGTAATGTCAGGGTCTCTGCCTGTCCCAATAATTTCTGTAGATCGGAAGAGCGGTTCCAG      |
| chr15 | 40512971 | 40513010 | BUB1B_7637  | + | GTGACCTATGCACCAGACGTCAAGTCTCACAGATTGCTGCCTCAGAGCAATGGTTGATTAGATCGGAAGAGCGGTTCCAG     |
| chr12 | 12871259 | 12871298 | CDKN1B_7638 | + | GTGACCTATGCACCAGACGTTTTCCAAACATAGAATGTGTTTGGGCCCCGCTTGGCTAGATCGGAAGAGCGGTTCCAG       |
| chr12 | 12871891 | 12871930 | CDKN1B_7639 | + | GTGACCTATGCACCAGACGTGGGTTGATCACTAAAGAGCAGCAGCATGGAACCCGGGCCAGATCGGAAGAGCGGTTCCAG     |
| chr1  | 68512991 | 68513030 | DIRAS3_7640 | + | GTGACCTATGCACCAGACGTCCGAGGGGAGATACGTGCACAAGTCTCCACACTTAGCTAGATCGGAAGAGCGGTTCCAG      |
| chr1  | 68512646 | 68512685 | DIRAS3_7641 | + | GTGACCTATGCACCAGACGTAAAGCGGTGGCCCCGGGCTATAACGTGGCGCTGCAGAGCGCAGATCGGAAGAGCGGTTCCAG   |
| chr19 | 2164275  | 2164314  | DOT1L_7642  | + | GTGACCTATGCACCAGACGTCCCTCCACCGTCCCTACCTCCCGGCTCCCTCTCCGCCAGATCGGAAGAGCGGTTCCAG       |
| chr19 | 2180766  | 2180805  | DOT1L_7643  | + | GTGACCTATGCACCAGACGTGGCCCTGACGTGTGTCTTCCACAGCCCTGAGCCACTTCCAGATCGGAAGAGCGGTTCCAG     |
| chr19 | 2185939  | 2185978  | DOT1L_7644  | + | GTGACCTATGCACCAGACGTTCTCCTGTCAGCGCTCCGCTCCGAGCAGACTCGGCTCTAGATCGGAAGAGCGGTTCCAG      |
| chr19 | 2189805  | 2189844  | DOT1L_7645  | + | GTGACCTATGCACCAGACGTTGCCCTGCCAGAGGGGTTAGTAGTGCCAGGCTCCCGAGATCGGAAGAGCGGTTCCAG        |
| chr19 | 2191250  | 2191289  | DOT1L_7646  | + | GTGACCTATGCACCAGACGTCCCGCCATGCCCGGCTCTGTGCCTCAGGCCACACGCAGATCGGAAGAGCGGTTCCAG        |
| chr19 | 2193793  | 2193832  | DOT1L_7647  | + | GTGACCTATGCACCAGACGTCTGAGGGCCAGGGTGTGTTGGAGGCAGGGACCATCAGAGAGATCGGAAGAGCGGTTCCAG     |
| chr19 | 2199949  | 2199988  | DOT1L_7648  | + | GTGACCTATGCACCAGACGTCTGGGGCCAGCGGCATGTGGGGTGTGCGCTCACAGGCAGATCGGAAGAGCGGTTCCAG       |
| chr19 | 2202789  | 2202828  | DOT1L_7649  | + | GTGACCTATGCACCAGACGTCTCCCTGCCGTCTGTGTGGTGTGATGATTGAGGAAGATCGGAAGAGCGGTTCCAG          |
| chr19 | 2206807  | 2206846  | DOT1L_7650  | + | GTGACCTATGCACCAGACGTCATGTTGTTAATGATGAACAGCGGTAATTTAAACATCAGATCGGAAGAGCGGTTCCAG       |
| chr19 | 2207690  | 2207729  | DOT1L_7651  | + | GTGACCTATGCACCAGACGTGCTGCGCCTCAGCCGCAGGGCCGCTCGTGGTCTTCCACCCAGATCGGAAGAGCGGTTCCAG    |
| chr19 | 2208986  | 2209025  | DOT1L_7652  | + | GTGACCTATGCACCAGACGTGTGTTTTTCTCTGGGTTAATAACACGCATGCACCTGATGAGATCGGAAGAGCGGTTCCAG     |
| chr19 | 2210520  | 2210559  | DOT1L_7653  | + | GTGACCTATGCACCAGACGTAGCCTGGCTCTGTGCTGGAGGGCACCCTCCCTCCAGATCGGAAGAGCGGTTCCAG          |
| chr19 | 2210865  | 2210904  | DOT1L_7654  | + | GTGACCTATGCACCAGACGTCCACGCCCAGGGCCCCGCTCTCCCGAGTGCCGATGCCATAGATCGGAAGAGCGGTTCCAG     |
| chr19 | 2211222  | 2211261  | DOT1L_7655  | + | GTGACCTATGCACCAGACGTGTGAGGCGTCCGGCTCTGGGCTTGGGTCATCCAGATCGGAAGAGCGGTTCCAG            |
| chr19 | 2211852  | 2211891  | DOT1L_7656  | + | GTGACCTATGCACCAGACGTGCCCTTGGCATTCCGCTCCCGCACAGAGGCAGTTTCAGATCGGAAGAGCGGTTCCAG        |

|       |           |           |            |   |                                                                                     |
|-------|-----------|-----------|------------|---|-------------------------------------------------------------------------------------|
| chr19 | 2213650   | 2213689   | DOT1L_7657 | + | GTGACCTATGCACCAGACGTCCAGAGGGCAGGTGGCAGGTGGCAGCTGGGGCGCAGGCTGAGATCGGAAGAGCGGTTTCAG   |
| chr19 | 2213996   | 2214035   | DOT1L_7658 | + | GTGACCTATGCACCAGACGTGCGGCCAAGGACAGGGACGTGGAACCAGAGGGGCCCTGCCAGATCGGAAGAGCGGTTTCAG   |
| chr19 | 2214606   | 2214645   | DOT1L_7659 | + | GTGACCTATGCACCAGACGTGCGGAGGCTGCACTCCGTGGTGTCCGAGCCTCTCCATCAAGATCGGAAGAGCGGTTTCAG    |
| chr19 | 2216775   | 2216814   | DOT1L_7660 | + | GTGACCTATGCACCAGACGTTGGTGGGGCTGGGGTCTGCAGCTGGTACTGCCACTCTAGATCGGAAGAGCGGTTTCAG      |
| chr19 | 2217100   | 2217139   | DOT1L_7661 | + | GTGACCTATGCACCAGACGTGACCCCTGCCCGGGCTCAGGGAGGTGCTCAGCAGAGGCAGATCGGAAGAGCGGTTTCAG     |
| chr19 | 2217928   | 2217967   | DOT1L_7662 | + | GTGACCTATGCACCAGACGTCCCAGGTGGCTGTCCCCAAGGGCCACGTTGAGGCAAAACAAGATCGGAAGAGCGGTTTCAG   |
| chr19 | 2220232   | 2220271   | DOT1L_7663 | + | GTGACCTATGCACCAGACGTTCCTGTGCCCTACCTCAGACTCTGCTGCTGTCTGTAGATCGGAAGAGCGGTTTCAG        |
| chr19 | 2222569   | 2222608   | DOT1L_7664 | + | GTGACCTATGCACCAGACGTGGACCCGACGGGCTGGGGAGCGCGGCCTGTGAAAGAAAGAAGATCGGAAGAGCGGTTTCAG   |
| chr19 | 2223496   | 2223535   | DOT1L_7665 | + | GTGACCTATGCACCAGACGTGGGCCCGAGGGGGCGGGCCTGGCAGCAGGGGCAGGAGATCGGAAGAGCGGTTTCAG        |
| chr19 | 2225462   | 2225501   | DOT1L_7666 | + | GTGACCTATGCACCAGACGTAGTGTTTTCGGCGCTGGCCAGGCCTGTCCGTGTGGCCGTGAGATCGGAAGAGCGGTTTCAG   |
| chr19 | 2229802   | 2229841   | DOT1L_7667 | + | GTGACCTATGCACCAGACGTTCAACCCGCGACTATGCAAGGACGGTGTGGACCAACTCAGATCGGAAGAGCGGTTTCAG     |
| chr19 | 2222277   | 2222316   | DOT1L_7668 | + | GTGACCTATGCACCAGACGTCTGAGAGTGAAGCCAAAGGAGGATTGTGTTCCACTCAAGATCGGAAGAGCGGTTTCAG      |
| chr19 | 2226664   | 2226703   | DOT1L_7669 | + | GTGACCTATGCACCAGACGTGAGGGCAGCCGCCAAGGAGCAGGGGAGGGCGCCCTACAGATCGGAAGAGCGGTTTCAG      |
| chr3  | 134514542 | 134514581 | EPHB1_7670 | + | GTGACCTATGCACCAGACGTCTCCACGGAGCAAGTTGGCTGCTGGTGGCCGGCCGCTTGGAGATCGGAAGAGCGGTTTCAG   |
| chr3  | 134644733 | 134644772 | EPHB1_7671 | + | GTGACCTATGCACCAGACGTAAACCATTGCTCTTCAGTCCCTGCTATGAGGTCTGGATCCAGATCGGAAGAGCGGTTTCAG   |
| chr3  | 134670905 | 134670944 | EPHB1_7672 | + | GTGACCTATGCACCAGACGTGAGCCTCTGCTTCCTGCCACTCTATGGCAGGGCCAGATCTAGATCGGAAGAGCGGTTTCAG   |
| chr3  | 134825456 | 134825495 | EPHB1_7673 | + | GTGACCTATGCACCAGACGTAGTAATGGCTCTGGCTGGGGAGTTGGTTCCCTGTAGATCGGAAGAGCGGTTTCAG         |
| chr3  | 134851902 | 134851941 | EPHB1_7674 | + | GTGACCTATGCACCAGACGTAGGCTCTGTGCTGCTGTGGTGTGGCTGGTGTGGATCGGAAGAGCGGTTTCAG            |
| chr3  | 134873129 | 134873168 | EPHB1_7675 | + | GTGACCTATGCACCAGACGTTTACTGCAAGCTTGCAAGCCAAAGGCCAGCCACTGTAGATCGGAAGAGCGGTTTCAG       |
| chr3  | 134881033 | 134881072 | EPHB1_7676 | + | GTGACCTATGCACCAGACGTGGGAGGGCAGTGGCATAATCACAGGGCAGGCAGTGTGGGAAGATCGGAAGAGCGGTTTCAG   |
| chr3  | 134884929 | 134884968 | EPHB1_7677 | + | GTGACCTATGCACCAGACGTCACTCTCACTTGTCTCTCTGGACCAGGAAGCCCTCTCAGATCGGAAGAGCGGTTTCAG      |
| chr3  | 134885859 | 134885898 | EPHB1_7678 | + | GTGACCTATGCACCAGACGTAGCAGAGACCCTGGTGTCTGACCCCCACAGGCCACTGAGTACAGATCGGAAGAGCGGTTTCAG |
| chr3  | 134898835 | 134898874 | EPHB1_7679 | + | GTGACCTATGCACCAGACGTTCCCTGCTCTTGTTCCTTGTCTCTGCTGTTCCCAACACTTAGATCGGAAGAGCGGTTTCAG   |
| chr3  | 134911676 | 134911715 | EPHB1_7680 | + | GTGACCTATGCACCAGACGCTCAAGGGTGTGGTGGTTCAGATCGAGTGAATGATAGATCGGAAGAGCGGTTTCAG         |
| chr3  | 134920542 | 134920581 | EPHB1_7681 | + | GTGACCTATGCACCAGACGTTTGGCATTCTCAAGTAGAAGCATGGCATGAGTTAAAGGGAGATCGGAAGAGCGGTTTCAG    |
| chr3  | 134960150 | 134960189 | EPHB1_7682 | + | GTGACCTATGCACCAGACGTGCAGCACTTGGTCCACAAAACCCCCATTGAAGGGATCCCAGATCGGAAGAGCGGTTTCAG    |
| chr3  | 134967362 | 134967401 | EPHB1_7683 | + | GTGACCTATGCACCAGACGTTGAACCGGTGATCCCTAAATATGGCTGGTTTCATGGTTCAGAGATCGGAAGAGCGGTTTCAG  |
| chr3  | 134968344 | 134968383 | EPHB1_7684 | + | GTGACCTATGCACCAGACGTAGAATCTCTGTCCAGACCACACTAGGGGTCAGTGCTCAGATCGGAAGAGCGGTTTCAG      |
| chr3  | 134977973 | 134978012 | EPHB1_7685 | + | GTGACCTATGCACCAGACGTTTCTGGGAAGGAGAGAGGACCAGGGTCAAGAGATCGGAAGAGCGGTTTCAG             |
| chr3  | 134670564 | 134670603 | EPHB1_7686 | + | GTGACCTATGCACCAGACGTAAACACAGAACTCAGGACTTTGGCCCTTACTCGGAATGAGATCGGAAGAGCGGTTTCAG     |
| chr7  | 142561096 | 142561135 | EPHB6_7687 | + | GTGACCTATGCACCAGACGTGGGGAGACAGGAGAACCAGACCTGCCATAGAGACCCAGTATAGATCGGAAGAGCGGTTTCAG  |
| chr7  | 142561464 | 142561503 | EPHB6_7688 | + | GTGACCTATGCACCAGACGTCCTAATTCTGAACCTGAATCCCTTGGCCCTGCCCTCCCAGATCGGAAGAGCGGTTTCAG     |
| chr7  | 142562515 | 142562554 | EPHB6_7689 | + | GTGACCTATGCACCAGACGTACTCGTCTTGCCTTGGCCGACACTCCACCCACCCCCAAGATCGGAAGAGCGGTTTCAG      |
| chr7  | 142563396 | 142563435 | EPHB6_7690 | + | GTGACCTATGCACCAGACGTCAACCCAGCCCTGCAATGGGAAGAGACTTGGAGAGGGCCAGATCGGAAGAGCGGTTTCAG    |
| chr7  | 142564082 | 142564121 | EPHB6_7691 | + | GTGACCTATGCACCAGACGTTTCCCTTGGCTTCAAGATCCCCTGCCTCCGCTCTTTGAGAGATCGGAAGAGCGGTTTCAG    |
| chr7  | 142564371 | 142564410 | EPHB6_7692 | + | GTGACCTATGCACCAGACGTGGAGTGGGGTTCGCGCAGTAGGGCTGGTAGGAGCTCATAGAGATCGGAAGAGCGGTTTCAG   |
| chr7  | 142564834 | 142564873 | EPHB6_7693 | + | GTGACCTATGCACCAGACGTGCAAGGGCCAGATGGGCAGGTGAAGGCCCAAGTGGGTAGAGATCGGAAGAGCGGTTTCAG    |
| chr7  | 142565488 | 142565527 | EPHB6_7694 | + | GTGACCTATGCACCAGACGTACCCTGCCAACCTCTGCCAGCACCATTAACTCCACAGCAGATCGGAAGAGCGGTTTCAG     |
| chr7  | 142565815 | 142565854 | EPHB6_7695 | + | GTGACCTATGCACCAGACGTGGAGAGGAAATGGGTGGGGCTGGGGAACACATGGTGGGGAGATCGGAAGAGCGGTTTCAG    |
| chr7  | 142566126 | 142566165 | EPHB6_7696 | + | GTGACCTATGCACCAGACGTGCCAAAGCAGGGATCAGAGCAGCGGGCTCCCTTGTGCCAGATCGGAAGAGCGGTTTCAG     |
| chr7  | 142566505 | 142566544 | EPHB6_7697 | + | GTGACCTATGCACCAGACGTCCTGGGTGAAGGAGGAGGGTCCCTTGGGTCAGGAAGCTTAGATCGGAAGAGCGGTTTCAG    |
| chr7  | 142566911 | 142566950 | EPHB6_7698 | + | GTGACCTATGCACCAGACGTAGCCTTGGGGACACAGCCTGGGGCCTTGTGGCATGCCCAAGATCGGAAGAGCGGTTTCAG    |
| chr7  | 142567730 | 142567769 | EPHB6_7699 | + | GTGACCTATGCACCAGACGTACCTAGACTGCTGATTCCCACCCCGATCCCTCCCAGGAGATCGGAAGAGCGGTTTCAG      |
| chr7  | 142568171 | 142568210 | EPHB6_7700 | + | GTGACCTATGCACCAGACGTTGGGGCTAGAGCCTGGGAAAGCCAGGGAGGGTATAGTCAAAGATCGGAAGAGCGGTTTCAG   |
| chr7  | 142568449 | 142568488 | EPHB6_7701 | + | GTGACCTATGCACCAGACGTAGTGGTGGGGTGGGGGCGAATGCTCCAGGCCCTGGCTGGAGATCGGAAGAGCGGTTTCAG    |
| chr7  | 142568668 | 142568707 | EPHB6_7702 | + | GTGACCTATGCACCAGACGTACCCTGACTCAGCCTAGCAGCTGTCCGAGAAGGACAAAGATCGGAAGAGCGGTTTCAG      |
| chr7  | 142562124 | 142562163 | EPHB6_7703 | + | GTGACCTATGCACCAGACGTGGGGCTGGACTGCAACTGAACGTCAAAGAGCGGAGCTTTGGAGATCGGAAGAGCGGTTTCAG  |
| chr20 | 57415910  | 57415949  | GNAS_7704  | + | GTGACCTATGCACCAGACGTGCTCCAGATTCTCCTTGTTCATGGATTAGGTTAGTGTAGATCGGAAGAGCGGTTTCAG      |
| chr20 | 57430399  | 57430438  | GNAS_7705  | + | GTGACCTATGCACCAGACGTGGACTCTGCCTGCGGGCAGCAGGGCCCGCCGGGAACCGGGAGATCGGAAGAGCGGTTTCAG   |
| chr20 | 57470750  | 57470789  | GNAS_7706  | + | GTGACCTATGCACCAGACGTAATCTGTGCAGGGGGCCCAAGTAAAGGAACAGACTTTAGATCGGAAGAGCGGTTTCAG      |
| chr20 | 57474051  | 57474090  | GNAS_7707  | + | GTGACCTATGCACCAGACGTTCAAACAGAAAAATTTGAACAACAAACAACAAATGAGATCGGAAGAGCGGTTTCAG        |
| chr20 | 57478651  | 57478690  | GNAS_7708  | + | GTGACCTATGCACCAGACGTGCTCCTTGTGCTGTCTGTCTGTAGCGCCCTCCAGCCAGAGATCGGAAGAGCGGTTTCAG     |
| chr20 | 57478857  | 57478896  | GNAS_7709  | + | GTGACCTATGCACCAGACGTCCCCGACTTGTGTGGCCTTAGCCCGCCACCTGAGCACAAAGATCGGAAGAGCGGTTTCAG    |
| chr20 | 57480546  | 57480585  | GNAS_7710  | + | GTGACCTATGCACCAGACGTGCCACCAACCCATCAGCACATAAACAGACAAAAACAAGAGATCGGAAGAGCGGTTTCAG     |
| chr20 | 57484282  | 57484321  | GNAS_7711  | + | GTGACCTATGCACCAGACGTCCCCCTCCACCAGAGACTCTGAGCCCTCTTTCCAAACTAGATCGGAAGAGCGGTTTCAG     |
| chr20 | 57484489  | 57484528  | GNAS_7712  | + | GTGACCTATGCACCAGACGTTGTACCTTTTTATATAACAGAGATCATGGTTTCTTGACAAGATCGGAAGAGCGGTTTCAG    |
| chr20 | 57484645  | 57484684  | GNAS_7713  | + | GTGACCTATGCACCAGACGTGTGGGCTGGCTTGTGTAAGAAGCCCTTGTCTGTAGATCGGAAGAGCGGTTTCAG          |
| chr20 | 57484870  | 57484909  | GNAS_7714  | + | GTGACCTATGCACCAGACGTTGACGCCCCACCCCTGCGCTTGGCCAGGAGGCCCTGGTTCAGATCGGAAGAGCGGTTTCAG   |

|       |          |           |             |   |                                                                                       |
|-------|----------|-----------|-------------|---|---------------------------------------------------------------------------------------|
| chr20 | 57485147 | 57485186  | GNAS_7715   | + | GTGACCTATGCACCAGACGTCCTCCACTCTTGCTGGCTGTTTCATTGCGGTGGTTCTTTTATAGATCGGAAGAGCGGTTTCCAG  |
| chr20 | 57485467 | 57485506  | GNAS_7716   | + | GTGACCTATGCACCAGACGTCCTGTCTTTAGTTTCCTCTCTTGTCTCCTCTTTTCTCAGATCGGAAGAGCGGTTTCCAG       |
| chr20 | 57485895 | 57485934  | GNAS_7717   | + | GTGACCTATGCACCAGACGTCCTCCAAATTTAATTAAGCCTTAAGCACAATTAATAAAGAGATCGGAAGAGCGGTTTCCAG     |
| chr20 | 57415541 | 57415580  | GNAS_7718   | + | GTGACCTATGCACCAGACGTCGGAGCCTGAGACCGCCCCACCCTGAGCCCCGAGACCGAAGATCGGAAGAGCGGTTTCCAG     |
| chr20 | 57428744 | 57428783  | GNAS_7719   | + | GTGACCTATGCACCAGACGTTGAGCCTCAGTGGTCCAGACAGGCCTGGGAGGATACAAGATCGGAAGAGCGGTTTCCAG       |
| chr20 | 57429157 | 57429196  | GNAS_7720   | + | GTGACCTATGCACCAGACGTCGCCATCGGCAGCCCAAGAGGCTGTGACACCTCTAGATCGGAAGAGCGGTTTCCAG          |
| chr20 | 57429609 | GNAS_7721 |             | + | GTGACCTATGCACCAGACGTCAGCCGCTGACTCCGGGCACTTCGCAGCCGATCCCGAAGATCGGCAGAGCGGTTTCCAG       |
| chr20 | 57429983 | 57430022  | GNAS_7722   | + | GTGACCTATGCACCAGACGTTCCGAGAGCAGCCGCGCGCGCTGTACTACGATGAAGAGATCGGAAGAGCGGTTTCCAG        |
| chr14 | 62162568 | 62162607  | HIF1A_7723  | + | GTGACCTATGCACCAGACGTTCCCTCGGCCCGCCGCTTCTCCCCGGCGACCCCGCCGAGATCGGAAGAGCGGTTTCCAG       |
| chr14 | 62187301 | 62187340  | HIF1A_7724  | + | GTGACCTATGCACCAGACGTTTACAAGGTTATAAATAGGCCTGAAAATTAGAAGTTAGAAAGATCGGAAGAGCGGTTTCCAG    |
| chr14 | 62188383 | 62188422  | HIF1A_7725  | + | GTGACCTATGCACCAGACGTCACATATTAAGAGCTCTTCTATATGTTTTTATGATTTTATAGATCGGAAGAGCGGTTTCCAG    |
| chr14 | 62188552 | 62188591  | HIF1A_7726  | + | GTGACCTATGCACCAGACGTTCTGTTGTTGATTTAATGTGACAGGTGGTTTTACATAATAGATCGGAAGAGCGGTTTCCAG     |
| chr14 | 62193547 | 62193586  | HIF1A_7727  | + | GTGACCTATGCACCAGACGTATTATTTGATTGATTATACACTTTTATATACATAGACAGATCGGAAGAGCGGTTTCCAG       |
| chr14 | 62194384 | 62194423  | HIF1A_7728  | + | GTGACCTATGCACCAGACGTTCTAAAATGTGAATTTGAAATTTTTAATAGTCTACAGCAAGATCGGAAGAGCGGTTTCCAG     |
| chr14 | 62199253 | 62199292  | HIF1A_7729  | + | GTGACCTATGCACCAGACGTTGGAAGAACTCAGAGATATTCTAATTACTTAAGTGTGCAAGATCGGAAGAGCGGTTTCCAG     |
| chr14 | 62201014 | 62201053  | HIF1A_7730  | + | GTGACCTATGCACCAGACGTTTGAGAAATAAACATTTTTGGGGAACAATAAGTAATTTTATAGATCGGAAGAGCGGTTTCCAG   |
| chr14 | 62203838 | 62203877  | HIF1A_7731  | + | GTGACCTATGCACCAGACGTTATTTTTGTTAATCCCCTAAATTTGTGCTGTGTCTACAAGCAGATCGGAAGAGCGGTTTCCAG   |
| chr14 | 62205102 | 62205141  | HIF1A_7732  | + | GTGACCTATGCACCAGACGTTGATATAATGAAAAGGGACAATTTTCAGATTTTAAACATTTAGATCGGAAGAGCGGTTTCCAG   |
| chr14 | 62207356 | 62207395  | HIF1A_7733  | + | GTGACCTATGCACCAGACGTTTATTTGTTTATATAAATTTTCAATTTTTATGTTTGAAGATCGGAAGAGCGGTTTCCAG       |
| chr14 | 62207917 | 62207956  | HIF1A_7734  | + | GTGACCTATGCACCAGACGTGTAACATTCAAGTTATAGTTCTTTTATTATTTTTGAGATAAGATCGGAAGAGCGGTTTCCAG    |
| chr14 | 62212546 | 62212585  | HIF1A_7735  | + | GTGACCTATGCACCAGACGTTCTTTTTGACCTTGAACATCACAAAAGACAAAATACATGAAGATCGGAAGAGCGGTTTCCAG    |
| chr14 | 62213668 | 62213707  | HIF1A_7736  | + | GTGACCTATGCACCAGACGTGCTGGGGCAATCAATGGATGAAAGTGATTACCACAGCTGAGATCGGAAGAGCGGTTTCCAG     |
| chr14 | 62213814 | 62213853  | HIF1A_7737  | + | GTGACCTATGCACCAGACGTAATTTCACTTCTTTTTTGACACTGGTGGCTCATTACATAGATCGGAAGAGCGGTTTCCAG      |
| chr11 | 94153358 | 94153397  | MRE11A_7738 | + | GTGACCTATGCACCAGACGTATACAATGTTGATTGATTGACTTCCCTGCTTCACTGAAGATCGGAAGAGCGGTTTCCAG       |
| chr11 | 94169076 | 94169115  | MRE11A_7739 | + | GTGACCTATGCACCAGACGTAACAAGCAACAACACAGTTTTTTGTGAGAATAGACTCTGAAAGATCGGAAGAGCGGTTTCCAG   |
| chr11 | 94170412 | 94170451  | MRE11A_7740 | + | GTGACCTATGCACCAGACGTAAGATGAAATGTGCATTATGTTATTCTAAAATAACTTAAGATCGGAAGAGCGGTTTCCAG      |
| chr11 | 94179070 | 94179109  | MRE11A_7741 | + | GTGACCTATGCACCAGACGTAATGAACAGTCAATGTACAAGCCTATCAGCAGCTAAGGTTAGATCGGAAGAGCGGTTTCCAG    |
| chr11 | 94180615 | 94180654  | MRE11A_7742 | + | GTGACCTATGCACCAGACGTGAAGAAGGAGAAAAGTACACAACATGAGATAACGTACCATAGATCGGAAGAGCGGTTTCCAG    |
| chr11 | 94189515 | 94189554  | MRE11A_7743 | + | GTGACCTATGCACCAGACGTACAGATAAATCACAAAATTTGCATTTCCAGTTATGTAGATCGGAAGAGCGGTTTCCAG        |
| chr11 | 94192758 | 94192797  | MRE11A_7744 | + | GTGACCTATGCACCAGACGTTCAATCACTGGATGCAGAAATGTTTTTATTCCTTAAAAAGATCGGAAGAGCGGTTTCCAG      |
| chr11 | 94194213 | 94194252  | MRE11A_7745 | + | GTGACCTATGCACCAGACGTAGAAGTATATCAAAAAATAGCTTCTATCATAATGTTAAAAAGATCGGAAGAGCGGTTTCCAG    |
| chr11 | 94197416 | 94197455  | MRE11A_7746 | + | GTGACCTATGCACCAGACGTAGAATAATCTATGAACGCTAGGAAACAACAATTTGCCAATAGATCGGAAGAGCGGTTTCCAG    |
| chr11 | 94201070 | 94201109  | MRE11A_7747 | + | GTGACCTATGCACCAGACGTTTAAAAAGATAAAAAACAACCTAGTAACTGAGTTTAAACAGATCGGAAGAGCGGTTTCCAG     |
| chr11 | 94203819 | 94203858  | MRE11A_7748 | + | GTGACCTATGCACCAGACGTGAAAAATGAACACCGACTACAGGTTAAATTTCTCAGGGAGATCGGAAGAGCGGTTTCCAG      |
| chr11 | 94204936 | 94204975  | MRE11A_7749 | + | GTGACCTATGCACCAGACGTTATTTGAAAAATATAAATTTTCGTTGATTGAAAAAATTTTCATAGATCGGAAGAGCGGTTTCCAG |
| chr11 | 94209580 | 94209619  | MRE11A_7750 | + | GTGACCTATGCACCAGACGTCATTACATTATTTTTAAATTTGTTTTCTTACTTCGCTTAAAGATCGGAAGAGCGGTTTCCAG    |
| chr11 | 94212053 | 94212092  | MRE11A_7751 | + | GTGACCTATGCACCAGACGTTAATTTCAAAGAATGTTAGTGTGTATGTAAGTAGGTATAGATCGGAAGAGCGGTTTCCAG      |
| chr11 | 94212938 | 94212977  | MRE11A_7752 | + | GTGACCTATGCACCAGACGTTAAAAGTTACTTAAAATTTCCATACGGGACAAAAGCTGTTTAGATCGGAAGAGCGGTTTCCAG   |
| chr11 | 94219261 | 94219300  | MRE11A_7753 | + | GTGACCTATGCACCAGACGTTAAAAAGGTGTTAAAATTTAGTATGTTTTACAGGTAAAATTAGATCGGAAGAGCGGTTTCCAG   |
| chr11 | 94224142 | 94224181  | MRE11A_7754 | + | GTGACCTATGCACCAGACGTTAAGAAGAAACATTTCAATATATAAATTTTCAATTAAGAGATCGGAAGAGCGGTTTCCAG      |
| chr11 | 94225978 | 94226017  | MRE11A_7755 | + | GTGACCTATGCACCAGACGTTAAGCTCCTCTGAGGACCACTTCTTCTTCCAAAGAACCCAGATCGGAAGAGCGGTTTCCAG     |
| chr16 | 81819798 | 81819837  | PLCG2_7756  | + | GTGACCTATGCACCAGACGTGCTGGGTGGGGCAGTGTGGCCGCTCTCTGGGCCCCGGCAGATCGGAAGAGCGGTTTCCAG      |
| chr16 | 81888203 | 81888242  | PLCG2_7757  | + | GTGACCTATGCACCAGACGTTTCTGTGCCCTTCTCCTTCCCTGTGCCCTTGTGCTTCCAGATCGGAAGAGCGGTTTCCAG      |
| chr16 | 81891972 | 81892011  | PLCG2_7758  | + | GTGACCTATGCACCAGACGTTTTGCTGTGATTGCGTAGTTGCTGATTCTTTTATCTAGATCGGAAGAGCGGTTTCCAG        |
| chr16 | 81892779 | 81892818  | PLCG2_7759  | + | GTGACCTATGCACCAGACGTTTTCAGTTTTTTCTGATCACTTTGGATTTCGATCCTCATTAGATCGGAAGAGCGGTTTCCAG    |
| chr16 | 81902914 | 81902953  | PLCG2_7760  | + | GTGACCTATGCACCAGACGTTGGCTGAGCCTGGGAATTTTATGATTCGAGCTAGATCGGAAGAGCGGTTTCCAG            |
| chr16 | 81904551 | 81904590  | PLCG2_7761  | + | GTGACCTATGCACCAGACGTTCTTGGCAAGTATCAAGTATGTTTCTGTTTTCCATGTAGATCGGAAGAGCGGTTTCCAG       |
| chr16 | 81914569 | 81914608  | PLCG2_7762  | + | GTGACCTATGCACCAGACGTTCTGTGTGCTGTTGGGGCGGCTGTGCCGGACCTCGGTGAGATCGGAAGAGCGGTTTCCAG      |
| chr16 | 81916957 | 81916996  | PLCG2_7763  | + | GTGACCTATGCACCAGACGTTAAGTGTGTGGTGCCTGAGGAGCTGGCGGGATGCTGCTAGATCGGAAGAGCGGTTTCCAG      |
| chr16 | 81922889 | 81922928  | PLCG2_7764  | + | GTGACCTATGCACCAGACGTTGGGCTTGTGTGCTTGGGGGTGACTTTTTGATTGATGTAGATCGGAAGAGCGGTTTCCAG      |
| chr16 | 81925206 | 81925245  | PLCG2_7765  | + | GTGACCTATGCACCAGACGTGATGCTGTGATGGTGTGGGCACACAGACGCTGAGAGATCGGAAGAGCGGTTTCCAG          |
| chr16 | 81927410 | 81927449  | PLCG2_7766  | + | GTGACCTATGCACCAGACGTCCTTCTGTTGAGGTGAGGCTCGCAGCAAAATAGAGATAAGATCGGAAGAGCGGTTTCCAG      |
| chr16 | 81929543 | 81929582  | PLCG2_7767  | + | GTGACCTATGCACCAGACGTTGATTTCTGGGTGGTGTGACTTAAAGGGGAAGGCAGCTAGAGATCGGAAGAGCGGTTTCCAG    |
| chr16 | 81934396 | 81934435  | PLCG2_7768  | + | GTGACCTATGCACCAGACGTCGGGTGCTGCTGTTGGCTGTCCAGGGAGCCCAGTGGCTCGAGATCGGAAGAGCGGTTTCCAG    |
| chr16 | 81939123 | 81939162  | PLCG2_7769  | + | GTGACCTATGCACCAGACGTTGCCCTTCCGTAGCCACTGCGGCCACGCCCTTGCAGCTAGATCGGAAGAGCGGTTTCCAG      |
| chr16 | 81941390 | 81941429  | PLCG2_7770  | + | GTGACCTATGCACCAGACGTACCCTAGCCACATAGGGAGGAGCTCCCAAGAACCCGAGAGATCGGAAGAGCGGTTTCCAG      |
| chr16 | 81942207 | 81942246  | PLCG2_7771  | + | GTGACCTATGCACCAGACGTCGACCCAGGGAACCGTACTTCTTCCATGCCAACCCGAAGATCGGAAGAGCGGTTTCCAG       |
| chr16 | 81944336 | 81944375  | PLCG2_7772  | + | GTGACCTATGCACCAGACGTGAGGGTGGAGGAGGAGGCCAGGCCGTTGCTGGGTTAGTCTCAGATCGGAAGAGCGGTTTCCAG   |

|       |           |           |             |   |                                                                                     |
|-------|-----------|-----------|-------------|---|-------------------------------------------------------------------------------------|
| chr16 | 81946332  | 81946371  | PLCG2_7773  | + | GTGACCTATGCACCAGACGTGGTGAGGGAGCCACATGCTCTACAGAGGGGCTTGCAAGGAAGATCGGAAGAGCGGTTTCAG   |
| chr16 | 81953280  | 81953319  | PLCG2_7774  | + | GTGACCTATGCACCAGACGTGACTCCCTTGTGATTTGGTGGGATTTCTGTCTGAGGTTGAGATCGGAAGAGCGGTTTCAG    |
| chr16 | 81954885  | 81954924  | PLCG2_7775  | + | GTGACCTATGCACCAGACGTGAACCTCCAATTCACATGATTTTGGAGTCACGAGGCTGATAGATCGGAAGAGCGGTTTCAG   |
| chr16 | 81957210  | 81957249  | PLCG2_7776  | + | GTGACCTATGCACCAGACGTGTTGGAGGCTGGGCTGCTCGGCAGGTGGGCTTGACTTGTCCAGATCGGAAGAGCGGTTTCAG  |
| chr16 | 81960794  | 81960833  | PLCG2_7777  | + | GTGACCTATGCACCAGACGTCTCTTCGATCCTCTACAGGAAGAAGGGATCTGCAGGTCAGATCGGAAGAGCGGTTTCAG     |
| chr16 | 81962240  | 81962279  | PLCG2_7778  | + | GTGACCTATGCACCAGACGTACATCATCTTAGCCTGGATTTCACCCCTATCCCCATGGAGATCGGAAGAGCGGTTTCAG     |
| chr16 | 81965270  | 81965309  | PLCG2_7779  | + | GTGACCTATGCACCAGACGTGCTCACCCGGTGCCAGTTGGGCTGGCATTCTGAGGGCTTAGATCGGAAGAGCGGTTTCAG    |
| chr16 | 81968147  | 81968186  | PLCG2_7780  | + | GTGACCTATGCACCAGACGTCCCAAGAACATGCCCTATAACTCCAATGAAAACCTTAAGTATAGATCGGAAGAGCGGTTTCAG |
| chr16 | 81969994  | 81970033  | PLCG2_7781  | + | GTGACCTATGCACCAGACGTACTGAAGGTAGTCCCGTCCCTGCAAGGTGGCGGTTGCAGTAGATCGGAAGAGCGGTTTCAG   |
| chr16 | 81971519  | 81971558  | PLCG2_7782  | + | GTGACCTATGCACCAGACGTCCCTCCCTTCTGCTGCCAGGGGAGCCAGCCGCCCTCCCTGGGAGATCGGAAGAGCGGTTTCAG |
| chr16 | 81972531  | 81972570  | PLCG2_7783  | + | GTGACCTATGCACCAGACGTACCTTGGGCCCTCTGCTTTTAAACGTCCGGCCAGTGAATAGATCGGAAGAGCGGTTTCAG    |
| chr16 | 81973675  | 81973714  | PLCG2_7784  | + | GTGACCTATGCACCAGACGTTTTTAATTAAGATTTTCGATTTGGGCTGGCGTTGTACTTTAGATCGGAAGAGCGGTTTCAG   |
| chr16 | 81979879  | 81979918  | PLCG2_7785  | + | GTGACCTATGCACCAGACGTAAACACCGATTAAGGGTTCCCTGAGCTATGCCTGCTGTTGAGATCGGAAGAGCGGTTTCAG   |
| chr16 | 81990495  | 81990534  | PLCG2_7786  | + | GTGACCTATGCACCAGACGTCCCTCCACCTGCAAAAACCTTTTGGGGGTCTCTAGGCACAGATCGGAAGAGCGGTTTCAG    |
| chr16 | 81991614  | 81991653  | PLCG2_7787  | + | GTGACCTATGCACCAGACGTATGTGTGAAGGGTATTGTGTGTGTGCGCATGTGTGTTGAGATCGGAAGAGCGGTTTCAG     |
| chr12 | 112884213 | 112884252 | PTPN11_7788 | + | GTGACCTATGCACCAGACGTATGAAAAGAGAGGATCCTGAGAGTGTTTTCTAGGTAGGAAAAGATCGGAAGAGCGGTTTCAG  |
| chr12 | 112888327 | 112888366 | PTPN11_7789 | + | GTGACCTATGCACCAGACGTTTTTAGTGACCACAAAGTCTGCTCCCTTGTCGCCCTGAAGATCGGAAGAGCGGTTTCAG     |
| chr12 | 112891202 | 112891241 | PTPN11_7790 | + | GTGACCTATGCACCAGACGTAGTTGAAAACAGGTCGCAAGATGTACCTTTGGGTCGAAAGAGCGGTTTCAG             |
| chr12 | 112892495 | 112892534 | PTPN11_7791 | + | GTGACCTATGCACCAGACGTGGAAAGCTCAAGCTTCTCTCTTAAAACCTTAAAACAAATAGATCGGAAGAGCGGTTTCAG    |
| chr12 | 112893878 | 112893917 | PTPN11_7792 | + | GTGACCTATGCACCAGACGTAAAAACTGTTTTACGTGAGTTGTTATATCCTATTTTTAAGATCGGAAGAGCGGTTTCAG     |
| chr12 | 112910855 | 112910894 | PTPN11_7793 | + | GTGACCTATGCACCAGACGTATATCCGCTCAGTAATAGTCACCTTGGAGATTTTGGATTAGATCGGAAGAGCGGTTTCAG    |
| chr12 | 112915545 | 112915584 | PTPN11_7794 | + | GTGACCTATGCACCAGACGTCTTTTCCAGTGTTTTCTGACCATACATTTCTAGCCTATTAGATCGGAAGAGCGGTTTCAG    |
| chr12 | 112915830 | 112915869 | PTPN11_7795 | + | GTGACCTATGCACCAGACGTGAACTCTTTTTCTGCTAACTGTTTTAAAGTATCAGACAGATCGGAAGAGCGGTTTCAG      |
| chr12 | 112920020 | 112920059 | PTPN11_7796 | + | GTGACCTATGCACCAGACGTGGTCTGATTTCTAGACGTTGGGAAGTGGGATGTTGATGTTAGATCGGAAGAGCGGTTTCAG   |
| chr12 | 112924444 | 112924483 | PTPN11_7797 | + | GTGACCTATGCACCAGACGTCTGCTGCCCTCTAGGCCACAGCCTGCTCCCTGTCTCTAGATCGGAAGAGCGGTTTCAG      |
| chr12 | 112926325 | 112926364 | PTPN11_7798 | + | GTGACCTATGCACCAGACGTTGGTGGCAAGAAGCGACAGTTTCTGTTTTAGTTTATGGAGATCGGAAGAGCGGTTTCAG     |
| chr12 | 112926990 | 112927029 | PTPN11_7799 | + | GTGACCTATGCACCAGACGTGAGGGCTGGCATGCGGATTCATCTCTTGTAGGCCTCAGATCGGAAGAGCGGTTTCAG       |
| chr12 | 112940071 | 112940110 | PTPN11_7800 | + | GTGACCTATGCACCAGACGTCTGAAGGAAATCTTTTTACCTGGTCATGGTGGTTTTAAAAGATCGGAAGAGCGGTTTCAG    |
| chr12 | 112942579 | 112942618 | PTPN11_7801 | + | GTGACCTATGCACCAGACGTGAAACTCTCAGCACAGAAATAGTATTAATGCAAGTCAGATCGGAAGAGCGGTTTCAG       |
| chr5  | 131893156 | 131893195 | RAD50_7802  | + | GTGACCTATGCACCAGACGTAGTAGCCGCTTCAAGTTACAGGTCGCTACATCTTTGCGAAGATCGGAAGAGCGGTTTCAG    |
| chr5  | 131911631 | 131911670 | RAD50_7803  | + | GTGACCTATGCACCAGACGTATATGATATTTGAATTTCTGTTTCATTTTCAGTCTTTTAGGAGATCGGAAGAGCGGTTTCAG  |
| chr5  | 131915205 | 131915244 | RAD50_7804  | + | GTGACCTATGCACCAGACGTCTTAAATAGACTTTGTAGTCCATTAAGTTATTGAATCTGAGATCGGAAGAGCGGTTTCAG    |
| chr5  | 131923393 | 131923432 | RAD50_7805  | + | GTGACCTATGCACCAGACGTGTAAGATTTTGTCTGCTCAAATTTTGGGATTTTGAAGATCGGAAGAGCGGTTTCAG        |
| chr5  | 131923792 | 131923831 | RAD50_7806  | + | GTGACCTATGCACCAGACGTATTTATTTGGTCGTTTTTCTACTATGATGTTATACATAGATCGGAAGAGCGGTTTCAG      |
| chr5  | 131924583 | 131924622 | RAD50_7807  | + | GTGACCTATGCACCAGACGTGAAATAACAGTATTTGTTATTTTGTTCATCATTTCTCAGATCGGAAGAGCGGTTTCAG      |
| chr5  | 131925540 | 131925579 | RAD50_7808  | + | GTGACCTATGCACCAGACGTGTTTGAATAATCTAATAATTTAAGATATAACTTTTTAGAGATCGGAAGAGCGGTTTCAG     |
| chr5  | 131927109 | 131927148 | RAD50_7809  | + | GTGACCTATGCACCAGACGTCTTTTTGTCTAATTATACTGTCTGGTACTTAAAATAGCAGATCGGAAGAGCGGTTTCAG     |
| chr5  | 131927737 | 131927776 | RAD50_7810  | + | GTGACCTATGCACCAGACGTACATTTGGAGATGTAATAGAAATCTCTTATTTTCATGCTTAAGATCGGAAGAGCGGTTTCAG  |
| chr5  | 131930747 | 131930786 | RAD50_7811  | + | GTGACCTATGCACCAGACGTACTTTATATATCAGGATCTTTGACACCTTTGAATTTTAGATCGGAAGAGCGGTTTCAG      |
| chr5  | 131931513 | 131931552 | RAD50_7812  | + | GTGACCTATGCACCAGACGTGATTTACCTTCACTGTACATGTAGCAGCACATTGAAAAGAGATCGGAAGAGCGGTTTCAG    |
| chr5  | 131939192 | 131939231 | RAD50_7813  | + | GTGACCTATGCACCAGACGTGTAGTTTAAAGGCAAGTAAACTTGTCCATAGGTTGCTTAGATCGGAAGAGCGGTTTCAG     |
| chr5  | 131939749 | 131939788 | RAD50_7814  | + | GTGACCTATGCACCAGACGTCTGTGCTCTGTACTCATAGAGACTTTGACATTGCGAGAGATCGGAAGAGCGGTTTCAG      |
| chr5  | 131944428 | 131944467 | RAD50_7815  | + | GTGACCTATGCACCAGACGTATTATATATTTACTTATCAAATATCTGTATAAACTTATAGATCGGAAGAGCGGTTTCAG     |
| chr5  | 131945099 | 131945138 | RAD50_7816  | + | GTGACCTATGCACCAGACGTTTTGCTTATGATATCACTTACACATTGACATTTCTTTCTAGATCGGAAGAGCGGTTTCAG    |
| chr5  | 131951833 | 131951872 | RAD50_7817  | + | GTGACCTATGCACCAGACGTAAATAACTCTTCAAGTTTAAATAACCTCTTTTACTGGAAGATCGGAAGAGCGGTTTCAG     |
| chr5  | 131953997 | 131954036 | RAD50_7818  | + | GTGACCTATGCACCAGACGTGACTGGGGATTTTCTTATGCAAGTTAATAATTAACATACATAGATCGGAAGAGCGGTTTCAG  |
| chr5  | 131972903 | 131972942 | RAD50_7819  | + | GTGACCTATGCACCAGACGTGGTGTATCACAATGCTCTTTCCAAAAGCCCTCTCCGCAGAGATCGGAAGAGCGGTTTCAG    |
| chr5  | 131973926 | 131973965 | RAD50_7820  | + | GTGACCTATGCACCAGACGTCAAAGCCCTGGGGAGCCAACCTACCCAAAGTAACTGAAAGAGATCGGAAGAGCGGTTTCAG   |
| chr5  | 131976508 | 131976547 | RAD50_7821  | + | GTGACCTATGCACCAGACGTCTTGACATGCTCTGGTTGAGTAAATCTCACCATTGGGAGATCGGAAGAGCGGTTTCAG      |
| chr5  | 131978067 | 131978106 | RAD50_7822  | + | GTGACCTATGCACCAGACGTGATTTAAATGCCATAGAAATGTAGGTCCTCAGAAAAGTGAAGATCGGAAGAGCGGTTTCAG   |
| chr15 | 40991054  | 40991093  | RAD51_7823  | + | GTGACCTATGCACCAGACGTAGTTGCTAAATTTGGAATATATACATAGATCTTCTACCTAGATCGGAAGAGCGGTTTCAG    |
| chr15 | 40993410  | 40993449  | RAD51_7824  | + | GTGACCTATGCACCAGACGTCTTACTTAACTTAGGGAGGCCATTAGTGGAAATGACAAAAGATCGGAAGAGCGGTTTCAG    |
| chr15 | 40998503  | 40998542  | RAD51_7825  | + | GTGACCTATGCACCAGACGTCTTTATCCTGTGTTGTAACCTCTAGTTAGGAAAGCTTCCAGATCGGAAGAGCGGTTTCAG    |
| chr15 | 41001325  | 41001364  | RAD51_7826  | + | GTGACCTATGCACCAGACGTGGGGCTATAGCTAAATCAAATAAGCAAGCATTACTTCATTCAGATCGGAAGAGCGGTTTCAG  |
| chr15 | 41011108  | 41011147  | RAD51_7827  | + | GTGACCTATGCACCAGACGTGGTTTAGATAAGAGAGACTATGGCTACACTTATCAATGTAAGATCGGAAGAGCGGTTTCAG   |
| chr15 | 41021033  | 41021072  | RAD51_7828  | + | GTGACCTATGCACCAGACGTAGTATAAGACACCAAATGTTCTTAAGAGTCCCTCCCTGAGATCGGAAGAGCGGTTTCAG     |
| chr15 | 41021843  | 41021882  | RAD51_7829  | + | GTGACCTATGCACCAGACGTGGATGGGCACAGAAATGCTACTTTTCAGTGGCTGTAAATAGATCGGAAGAGCGGTTTCAG    |
| chr15 | 41022183  | 41022222  | RAD51_7830  | + | GTGACCTATGCACCAGACGTGATGGGATCGATTCCTTTTCCGGAATGTCATATTAAGTATAGATCGGAAGAGCGGTTTCAG   |

|       |           |           |            |   |                                                                                     |
|-------|-----------|-----------|------------|---|-------------------------------------------------------------------------------------|
| chr15 | 41023387  | 41023426  | RAD51_7831 | + | GTGACCTATGCACCAGACGTTTTTCTCTGTAAAAACCTTAAGTGCTGCAGCCTAATGAAGATCGGAAGAGCGGTTTCAG     |
| chr13 | 80911851  | 80911890  | SPRY2_7832 | + | GTGACCTATGCACCAGACGTAAGTGTGGTCACTCCAGCAGCGCTTAGAACACATCTGAACTAGATCGGAAGAGCGGTTTCAG  |
| chr13 | 80911377  | 80911416  | SPRY2_7833 | + | GTGACCTATGCACCAGACGTTTGGGTTGCACCCGGATTATGCCATCAGCAACAGGCCCGGAGATCGGAAGAGCGGTTTCAG   |
| chr16 | 89805127  | 89805166  | FANCA_7834 | + | GTGACCTATGCACCAGACGTGGAGCAGGTCCTCAGCCCATGCCGCCACTAGGCCTCAGAAGATCGGAAGAGCGGTTTCAG    |
| chr16 | 89805393  | 89805432  | FANCA_7835 | + | GTGACCTATGCACCAGACGTAACAGGCAAACCTACAGGTTAGAAGACATACAGAAACAGGAGATCGGAAGAGCGGTTTCAG   |
| chr16 | 89805708  | 89805747  | FANCA_7836 | + | GTGACCTATGCACCAGACGTAGACAGTGTGACAATGGCTACAGACTGCTGGAAAGGTAGAGATCGGAAGAGCGGTTTCAG    |
| chr16 | 89805972  | 89806011  | FANCA_7837 | + | GTGACCTATGCACCAGACGTAAGAAGTGGCTCAGGCAACTCTGGACATCTCTGCCTATTAAAGATCGGAAGAGCGGTTTCAG  |
| chr16 | 89806518  | 89806557  | FANCA_7838 | + | GTGACCTATGCACCAGACGTCAGGAGACCAACCCTGAGAATGGCCGACCTGGTGTCTCCAAGATCGGAAGAGCGGTTTCAG   |
| chr16 | 89807285  | 89807324  | FANCA_7839 | + | GTGACCTATGCACCAGACGTAAACGTGCACCTATTATTACATTAATAATACCTGTGCTGTAGATCGGAAGAGCGGTTTCAG   |
| chr16 | 89809357  | 89809396  | FANCA_7840 | + | GTGACCTATGCACCAGACGTGAGAACGGGGTCATTGCGAGGGCCTTACAACCATAACAACCAGATCGGAAGAGCGGTTTCAG  |
| chr16 | 89811490  | 89811529  | FANCA_7841 | + | GTGACCTATGCACCAGACGTAGCACCAGCACACAGATGAGGGTGGCTGAGATGGACACACAGATCGGAAGAGCGGTTTCAG   |
| chr16 | 89813107  | 89813146  | FANCA_7842 | + | GTGACCTATGCACCAGACGTGAACGCAGCAGGAGGTGACGGTTTTGTGAGGACCCACAACAGATCGGAAGAGCGGTTTCAG   |
| chr16 | 89813309  | 89813348  | FANCA_7843 | + | GTGACCTATGCACCAGACGTGTTCAAGGCAGGTAAGAAAAGCAACCCAGGAAAGAGAGGGGAAGATCGGAAGAGCGGTTTCAG |
| chr16 | 89815186  | 89815225  | FANCA_7844 | + | GTGACCTATGCACCAGACGTGGGGCTGTATTGGTGGCGACAGCACAGCGTACACTCTGCTAGATCGGAAGAGCGGTTTCAG   |
| chr16 | 89816321  | 89816360  | FANCA_7845 | + | GTGACCTATGCACCAGACGTGCAGTATGCTGGCAGAGGAAGGCCTCGGGGCTCACTGCCAGATCGGAAGAGCGGTTTCAG    |
| chr16 | 89818641  | 89818680  | FANCA_7846 | + | GTGACCTATGCACCAGACGTAATACATAAAATCCTCCTCAGTATCGCTAATAGTGCTGAGATCGGAAGAGCGGTTTCAG     |
| chr16 | 89825124  | 89825163  | FANCA_7847 | + | GTGACCTATGCACCAGACGTAAACACTGCTATCAATCTGAGAAATGCTTCGTGGCCAGCAGATCGGAAGAGCGGTTTCAG    |
| chr16 | 89828441  | 89828480  | FANCA_7848 | + | GTGACCTATGCACCAGACGTGAGCAAGCAATCAATCAATGAGACAGCACACAATCAGATCGGAAGAGCGGTTTCAG        |
| chr16 | 89831485  | 89831524  | FANCA_7849 | + | GTGACCTATGCACCAGACGTGAGTGACCCGGCTTTCTTCAATGCGCAAGTTTCACTGTAGATCGGAAGAGCGGTTTCAG     |
| chr16 | 89833656  | 89833695  | FANCA_7850 | + | GTGACCTATGCACCAGACGTAAATTATAACATATAAATGTAATCCATACAAAATAAGGGAAGATCGGAAGAGCGGTTTCAG   |
| chr16 | 89836443  | 89836482  | FANCA_7851 | + | GTGACCTATGCACCAGACGTAATGAGGGTGGCAGAGCAGACTGCCCTCTTCCAAGCTGGAAGATCGGAAGAGCGGTTTCAG   |
| chr16 | 89836678  | 89836717  | FANCA_7852 | + | GTGACCTATGCACCAGACGTAGCCGTGAAACCATCAGTACTAGCCATTCACTCCTGCACAAGATCGGAAGAGCGGTTTCAG   |
| chr16 | 89837053  | 89837092  | FANCA_7853 | + | GTGACCTATGCACCAGACGTACAGTCTCATGAGCGTGGTGTCTCTGGGACGGGAGCAGCAGATCGGAAGAGCGGTTTCAG    |
| chr16 | 89838233  | 89838272  | FANCA_7854 | + | GTGACCTATGCACCAGACGTGAAACTGATTAGGGATGACAAGAACCCGAAAGAGGGAAGATCGGAAGAGCGGTTTCAG      |
| chr16 | 89839803  | 89839842  | FANCA_7855 | + | GTGACCTATGCACCAGACGTAAGGAAGAAACCAGATGGAAGACACTCAACAGGACTCTTAGATCGGAAGAGCGGTTTCAG    |
| chr16 | 89842234  | 89842273  | FANCA_7856 | + | GTGACCTATGCACCAGACGTGGAACAATAACAATTAAGTCAGCTATGGCTTAAATTAATAGATCGGAAGAGCGGTTTCAG    |
| chr16 | 89845269  | 89845308  | FANCA_7857 | + | GTGACCTATGCACCAGACGTAGAAGAGACCTGTGAGAGACTGACAGGAAAGTCCCTTGCTAGATCGGAAGAGCGGTTTCAG   |
| chr16 | 89845422  | 89845461  | FANCA_7858 | + | GTGACCTATGCACCAGACGTGAGAAGCAGACAGTGTCATCAGTCAGAGCAGCGAGAAGGCAAGATCGGAAGAGCGGTTTCAG  |
| chr16 | 89846376  | 89846415  | FANCA_7859 | + | GTGACCTATGCACCAGACGTACAGGGAGGAAAAGGAAAAGAACAGAGGACTTTAAAGAAAGATCGGAAGAGCGGTTTCAG    |
| chr16 | 89849337  | 89849376  | FANCA_7860 | + | GTGACCTATGCACCAGACGTGACAGAGAATGAGAACAAGAAAACAAAGCAAGTTTCTGCTGAGATCGGAAGAGCGGTTTCAG  |
| chr16 | 89849521  | 89849560  | FANCA_7861 | + | GTGACCTATGCACCAGACGTATAGCAGAGCGCAGCACCGTTAGTCTGGAACTGCCTGGGAGATCGGAAGAGCGGTTTCAG    |
| chr16 | 89851383  | 89851422  | FANCA_7862 | + | GTGACCTATGCACCAGACGTAGAAGAGCGTGAAGCCAGGACAGCCAGGCGCGGCTGCACAGATCGGAAGAGCGGTTTCAG    |
| chr16 | 89857955  | 89857994  | FANCA_7863 | + | GTGACCTATGCACCAGACGTACCATGACATATCACAGCAAGGCAAGGGGAGCCAGCAGAGATCGGAAGAGCGGTTTCAG     |
| chr16 | 89858487  | 89858526  | FANCA_7864 | + | GTGACCTATGCACCAGACGTAGCATCCGCTCCTTCAATATCCAAGCAAACCAATGTGCGAGATCGGAAGAGCGGTTTCAG    |
| chr16 | 89858966  | 89859005  | FANCA_7865 | + | GTGACCTATGCACCAGACGTGAGAAACAGCAAAAAAATCTCAAGTCAGAGATCAAAAAGTGTGATCGGAAGAGCGGTTTCAG  |
| chr16 | 89862437  | 89862476  | FANCA_7866 | + | GTGACCTATGCACCAGACGTAGCAGAAAGAGGGTGCAGAAAGGGAGGGTGCCTTGCACGAGATCGGAAGAGCGGTTTCAG    |
| chr16 | 89865498  | 89865537  | FANCA_7867 | + | GTGACCTATGCACCAGACGTTTTAAAATATCTTGGCTCTTTAATTTGGCAGACACTCCCTAGATCGGAAGAGCGGTTTCAG   |
| chr16 | 89865651  | 89865690  | FANCA_7868 | + | GTGACCTATGCACCAGACGTAGCCAGGAACAGAAAACAGATGTACAGCACGCGCGGAGCAGATCGGAAGAGCGGTTTCAG    |
| chr16 | 89866057  | 89866096  | FANCA_7869 | + | GTGACCTATGCACCAGACGTAGAATGTGAGTTACCATCTTGGTAATCTCTGTAATTTGTAGATCGGAAGAGCGGTTTCAG    |
| chr16 | 89869760  | 89869799  | FANCA_7870 | + | GTGACCTATGCACCAGACGTATAAAACAAAGTATTATGACATCATGGTCTCCAAGCAGATCGGAAGAGCGGTTTCAG       |
| chr16 | 89871811  | 89871850  | FANCA_7871 | + | GTGACCTATGCACCAGACGTACACAGAGGACAGCAAGGCTCAACTAATCCCATCATAGATCGGAAGAGCGGTTTCAG       |
| chr16 | 89877221  | 89877260  | FANCA_7872 | + | GTGACCTATGCACCAGACGTAGATTACATTTTTAAAAAACAATAATACCTGAAACAATACAGATCGGAAGAGCGGTTTCAG   |
| chr16 | 89877490  | 89877529  | FANCA_7873 | + | GTGACCTATGCACCAGACGTAAACAAAACCATAGCTTCTCTTAACACATGAGACAAAATAGATCGGAAGAGCGGTTTCAG    |
| chr16 | 89882405  | 89882444  | FANCA_7874 | + | GTGACCTATGCACCAGACGTAAGTCGGTTTCAAACCATCACAGCAATTCACACACGGGAGATCGGAAGAGCGGTTTCAG     |
| chr16 | 89883034  | 89883073  | FANCA_7875 | + | GTGACCTATGCACCAGACGTCCTACAGCCCGCGGGCTCCCTGCGCCCAGCCCGCGAGATCGGAAGAGCGGTTTCAG        |
| chr11 | 22647367  | 22647406  | FANCF_7876 | + | GTGACCTATGCACCAGACGTAAAGGCGCTAAGGCTTCCGCTTCCACTTGAGAGCGGACTCTAGATCGGAAGAGCGGTTTCAG  |
| chr11 | 22646617  | 22646656  | FANCF_7877 | + | GTGACCTATGCACCAGACGTACTTCCGAATTCGCCAGAAAGCCAGTGGACTAGCACTTGGCAGATCGGAAGAGCGGTTTCAG  |
| chr11 | 22646992  | 22647031  | FANCF_7878 | + | GTGACCTATGCACCAGACGTGGAGCAGCCCGGCGGGAAAAGAGTTGCTGCACCAGGTGGTAGATCGGAAGAGCGGTTTCAG   |
| chr5  | 176516705 | 176516744 | FGFR4_7879 | + | GTGACCTATGCACCAGACGTTGAGGTGGGAGAGGGTGGCAGGGGTGGGAAGAGTGGGACAGATCGGAAGAGCGGTTTCAG    |
| chr5  | 176517665 | 176517704 | FGFR4_7880 | + | GTGACCTATGCACCAGACGTCTAGCAGGGAGTGAAGGATGCCTGGGGAGCAGACATGCAGATCGGAAGAGCGGTTTCAG     |
| chr5  | 176517837 | 176517876 | FGFR4_7881 | + | GTGACCTATGCACCAGACGTCCTCAAGGACTTGTGCCCCTGCTGCTCATCATCACAGATCGGAAGAGCGGTTTCAG        |
| chr5  | 176518116 | 176518155 | FGFR4_7882 | + | GTGACCTATGCACCAGACGTGGGTTCCAAAGACCCTGCTGCTCCCAATTTTCACTTCAAGATCGGAAGAGCGGTTTCAG     |
| chr5  | 176518820 | 176518859 | FGFR4_7883 | + | GTGACCTATGCACCAGACGTGGCTGGGAACAGGGGAGGGCTGACCCATTTTGGGCTCAGTAGATCGGAAGAGCGGTTTCAG   |
| chr5  | 176519523 | 176519562 | FGFR4_7884 | + | GTGACCTATGCACCAGACGTCACCTGCTGCAGCCTGGGCCCATCTTCTCCCACCTTGAGATCGGAAGAGCGGTTTCAG      |
| chr5  | 176519796 | 176519835 | FGFR4_7885 | + | GTGACCTATGCACCAGACGTGAAGGGCCAGGAGATGCTGCGAGATGCCCTCTGGGCCAGAGATCGGAAGAGCGGTTTCAG    |
| chr5  | 176520343 | 176520382 | FGFR4_7886 | + | GTGACCTATGCACCAGACGTCATCCCCACCTCACATGTGACAGCCTGACTCCAGCAGGCGATCGGAAGAGCGGTTTCAG     |
| chr5  | 176520563 | 176520602 | FGFR4_7887 | + | GTGACCTATGCACCAGACGCTGTGTGGGGCCAGGGACGGCGGGTTGACAGCCGAGATCGGAAGAGCGGTTTCAG          |
| chr5  | 176522452 | 176522491 | FGFR4_7888 | + | GTGACCTATGCACCAGACGTGGCGGGGCTGGCTGCACGGCCGTGAGGTGCAGGCCAAAAGATCGGAAGAGCGGTTTCAG     |



|       |           |           |              |   |                                                                                      |
|-------|-----------|-----------|--------------|---|--------------------------------------------------------------------------------------|
| chr5  | 176522735 | 176522774 | FGFR4_7889   | + | GTGACCTATGCACCAGACGTTAGGGCTCTGAGCCCTCTCAGTCTCTCCAGCTCCACTCTAGATCGGAAGAGCGGTTTCAG     |
| chr5  | 176523191 | 176523230 | FGFR4_7890   | + | GTGACCTATGCACCAGACGTTGGGGCAGAACTGGATGGGGGTGGAGGGGCACTGGGCCCGAGATCGGAAGAGCGGTTTCAG    |
| chr5  | 176523369 | 176523408 | FGFR4_7891   | + | GTGACCTATGCACCAGACGTCGCGCGGTCACCTGTCTACCCACAAAAAGGCAAGGCACAGATCGGAAGAGCGGTTTCAG      |
| chr5  | 176523753 | 176523792 | FGFR4_7892   | + | GTGACCTATGCACCAGACGTACCTGCCCCTGACCCCACTTCCAGTCTCTCTCTCCTCAGATCGGAAGAGCGGTTTCAG       |
| chr5  | 176524409 | 176524448 | FGFR4_7893   | + | GTGACCTATGCACCAGACGTTCCACCCACCACCTCCCTCTGCCTGCTCCCTCCAGGCCAGATCGGAAGAGCGGTTTCAG      |
| chr5  | 176524688 | 176524727 | FGFR4_7894   | + | GTGACCTATGCACCAGACGTAGGCTGTGCAGGCACATAGGCTGGTGGCCTTGGCCCTTGGAGATCGGAAGAGCGGTTTCAG    |
| chr13 | 28877516  | 28877555  | FLT1_7895    | + | GTGACCTATGCACCAGACGTAAGGAGAAATCAAATATTCAAATTTGGTTTTTTAGAAAAGATCGGAAGAGCGGTTTCAG      |
| chr13 | 28880920  | 28880959  | FLT1_7896    | + | GTGACCTATGCACCAGACGTAAGGAGAAAGTTATACTTTCCTGGCCAGCGGGGGTTCAGATCGGAAGAGCGGTTTCAG       |
| chr13 | 28883075  | 28883114  | FLT1_7897    | + | GTGACCTATGCACCAGACGTAACAGAAAGAAATATCAAGACAGGAAAAGGCATCCAGCTCAGATCGGAAGAGCGGTTTCAG    |
| chr13 | 28885880  | 28885919  | FLT1_7898    | + | GTGACCTATGCACCAGACGTAAGGTAAGAGCTCTCGTTGCACCAATTCTGACTTCAACAAAGATCGGAAGAGCGGTTTCAG    |
| chr13 | 28886246  | 28886285  | FLT1_7899    | + | GTGACCTATGCACCAGACGTAACAGCAACAGAAATAGTTGGAGAGCAGTGATCATCTTAAGATCGGAAGAGCGGTTTCAG     |
| chr13 | 28891745  | 28891784  | FLT1_7900    | + | GTGACCTATGCACCAGACGTCATGTGGAAAAACAGGGCCTGTTATGGCTTAAGGGTACAGATCGGAAGAGCGGTTTCAG      |
| chr13 | 28893682  | 28893721  | FLT1_7901    | + | GTGACCTATGCACCAGACGTGCAAGGGGGCCTTGAGCAGAAAGGCATGAAAACAAAGCACAGATCGGAAGAGCGGTTTCAG    |
| chr13 | 28895733  | 28895772  | FLT1_7902    | + | GTGACCTATGCACCAGACGTACAGTTGCATAATCAATGCATTTCTTAACCTAACCAACTAGATCGGAAGAGCGGTTTCAG     |
| chr13 | 28896507  | 28896546  | FLT1_7903    | + | GTGACCTATGCACCAGACGTTTAGAACCGTAAGTGTGTTGTAATGGCTCTTGTATCCACAGATCGGAAGAGCGGTTTCAG     |
| chr13 | 28897094  | 28897133  | FLT1_7904    | + | GTGACCTATGCACCAGACGTACCGAAAAAGACCCAGGTGAAAAGGAGCTCCAGCACACAGATCGGAAGAGCGGTTTCAG      |
| chr13 | 28901698  | 28901737  | FLT1_7905    | + | GTGACCTATGCACCAGACGTAACAGCACATGCTCATGGCTCAGCCACACCAAGCCAGTCAGATCGGAAGAGCGGTTTCAG     |
| chr13 | 28903876  | 28903915  | FLT1_7906    | + | GTGACCTATGCACCAGACGTGACAAGGAGACTGAGCCGCACAGCAATGGGGCTCTTAGATCGGAAGAGCGGTTTCAG        |
| chr13 | 28908277  | 28908316  | FLT1_7907    | + | GTGACCTATGCACCAGACGTGAGAAGACACTGGTTTTGTTTCCGAGGCAATAGGGTGAAGATCGGAAGAGCGGTTTCAG      |
| chr13 | 28913448  | 28913487  | FLT1_7908    | + | GTGACCTATGCACCAGACGTAAGAGATCTCAAAGTCATCGAGAAGAAAACAACCTTTACAAGATCGGAAGAGCGGTTTCAG    |
| chr13 | 28919699  | 28919738  | FLT1_7909    | + | GTGACCTATGCACCAGACGTAAGAAATCACAAATAGTGGTGCAACAAAGAAATCCCAAACAGATCGGAAGAGCGGTTTCAG    |
| chr13 | 28931833  | 28931872  | FLT1_7910    | + | GTGACCTATGCACCAGACGTAGAGATGTTTAGATTAGTGGGCTGGATGACAAAACAAAAAGATCGGAAGAGCGGTTTCAG     |
| chr13 | 28959179  | 28959218  | FLT1_7911    | + | GTGACCTATGCACCAGACGTAAGAAAGGGAGCTGTGATTACTCGTCAACTTTATTCTTTAGATCGGAAGAGCGGTTTCAG     |
| chr13 | 28964252  | 28964291  | FLT1_7912    | + | GTGACCTATGCACCAGACGTAGAATAAGAACTGATGTTACAGAAAATCAGTGTCTTTAGATCGGAAGAGCGGTTTCAG       |
| chr13 | 28971216  | 28971255  | FLT1_7913    | + | GTGACCTATGCACCAGACGTAAGGAAACTTTAGCTAGCAACAGGACAAATAACTAATTGAGATCGGAAGAGCGGTTTCAG     |
| chr13 | 28980042  | 28980081  | FLT1_7914    | + | GTGACCTATGCACCAGACGTAAGAAAGTTGTCACAATGTGGCTTTACAGCATGGTTTCAGTCAGATCGGAAGAGCGGTTTCAG  |
| chr13 | 29001466  | 29001505  | FLT1_7915    | + | GTGACCTATGCACCAGACGTGATGAAGAACGGGACAGAAGTCAAGAGCAGTTCTAATGACAGATCGGAAGAGCGGTTTCAG    |
| chr13 | 29002069  | 29002108  | FLT1_7916    | + | GTGACCTATGCACCAGACGTAACATGATCAGTAAGTCATTTACACGGCCCTCTCAATATAGATCGGAAGAGCGGTTTCAG     |
| chr13 | 29004315  | 29004354  | FLT1_7917    | + | GTGACCTATGCACCAGACGTAGAAGTGATACATACATTAGAAAAGAAATTTCCATAAAGATCGGAAGAGCGGTTTCAG       |
| chr13 | 29005458  | 29005497  | FLT1_7918    | + | GTGACCTATGCACCAGACGTAAGTATAACAAATGATTAGAAGGAGTGTTCATGCTTAAGATCGGAAGAGCGGTTTCAG       |
| chr13 | 29008103  | 29008142  | FLT1_7919    | + | GTGACCTATGCACCAGACGTAAGAGAGAAATTTTTAAAATTAAGATTTTACATACAGAAAGATCGGAAGAGCGGTTTCAG     |
| chr13 | 29008368  | 29008407  | FLT1_7920    | + | GTGACCTATGCACCAGACGTAGAGGCATGCATTAACAAGGTCCTATTAGCACTGGTTGGCAGATCGGAAGAGCGGTTTCAG    |
| chr13 | 29012493  | 29012532  | FLT1_7921    | + | GTGACCTATGCACCAGACGTAGAAAATGAAAAAATATATACATAAATGATTGACATGCAAGATCGGAAGAGCGGTTTCAG     |
| chr13 | 29041277  | 29041316  | FLT1_7922    | + | GTGACCTATGCACCAGACGTAGATAAGAAAACAAAATATTTATGGCTGGGCCCTAGGCAGATCGGAAGAGCGGTTTCAG      |
| chr13 | 29041765  | 29041804  | FLT1_7923    | + | GTGACCTATGCACCAGACGTAATTTTTAAAATGTAATTTGTAATTTGTAATTTGCTCTTACCTAGATCGGAAGAGCGGTTTCAG |
| chr13 | 29068991  | 29069030  | FLT1_7924    | + | GTGACCTATGCACCAGACGTACGCGGCTGCTCGCCGGTGCCCGCGCTCCCCGCGCCAAGATCGGAAGAGCGGTTTCAG       |
| chr13 | 41135008  | 41135047  | FOXO1_7925   | + | GTGACCTATGCACCAGACGTAACATCTTATTAGAAGTACAATACTTCTCTGCTTGCAAAAAGATCGGAAGAGCGGTTTCAG    |
| chr13 | 41240360  | 41240399  | FOXO1_7926   | + | GTGACCTATGCACCAGACGTGCCCCCTCCCCAGCCGACGAGAGCCAAAGAGGGGAGAACAGATCGGAAGAGCGGTTTCAG     |
| chr13 | 41134116  | 41134155  | FOXO1_7927   | + | GTGACCTATGCACCAGACGTACGACCAATAGGGCCCATCATGACGTTCTGGCCAGAAAGATCGGAAGAGCGGTTTCAG       |
| chr13 | 41134562  | 41134601  | FOXO1_7928   | + | GTGACCTATGCACCAGACGTCATCTTTCGCGCAGATGGCGGGTACACCATGAAGATGACAGATCGGAAGAGCGGTTTCAG     |
| chr15 | 66679776  | 66679815  | MAP2K1_7929  | + | GTGACCTATGCACCAGACGTGCGGGCGGTGAACTCGGGGCCGCTGGGAGGCTGGGAGGCTGGGAGATCGGAAGAGCGGTTTCAG |
| chr15 | 66727586  | 66727625  | MAP2K1_7930  | + | GTGACCTATGCACCAGACGTCCTGATTAACAGGTAATGGATTATTTCTCAGGGTACTTAAGATCGGAAGAGCGGTTTCAG     |
| chr15 | 66729241  | 66729280  | MAP2K1_7931  | + | GTGACCTATGCACCAGACGTCCTCTCAGCCTCTGGAGCAATGGCCTTAAGAGTTGGGTGAGATCGGAAGAGCGGTTTCAG     |
| chr15 | 66735706  | 66735745  | MAP2K1_7932  | + | GTGACCTATGCACCAGACGTTATGAAGTTTTTCTTCTAAGTCTCTCATTGATAAGTTAATAGATCGGAAGAGCGGTTTCAG    |
| chr15 | 66737056  | 66737095  | MAP2K1_7933  | + | GTGACCTATGCACCAGACGTAATTTGCTAGTTATTTGCTTTGAAATTTAGATAATCCAAGATCGGAAGAGCGGTTTCAG      |
| chr15 | 66774228  | 66774267  | MAP2K1_7934  | + | GTGACCTATGCACCAGACGTAAGTTTCTTCCATGCTTACGCTCTTGTACGGTCAGGGAGAGAGATCGGAAGAGCGGTTTCAG   |
| chr15 | 66777540  | 66777579  | MAP2K1_7935  | + | GTGACCTATGCACCAGACGTTGGTGTGTCCCTCTTGGACTGTTGGAGGGGAGGGTCCCAGATCGGAAGAGCGGTTTCAG      |
| chr15 | 66779641  | 66779680  | MAP2K1_7936  | + | GTGACCTATGCACCAGACGTCCTGGTTTCTTCACTTGGAAATTTACTTGTCTCATCTTAAAGATCGGAAGAGCGGTTTCAG    |
| chr15 | 66781625  | 66781664  | MAP2K1_7937  | + | GTGACCTATGCACCAGACGTTCTTGTCTGGAAGCGTATACTCTGGATTGTGAGGCAGATCGGAAGAGCGGTTTCAG         |
| chr15 | 66782112  | 66782151  | MAP2K1_7938  | + | GTGACCTATGCACCAGACGTTTATCCGGATTCTTACAGTACCTGTTTATTCATTTGTTTCAGATCGGAAGAGCGGTTTCAG    |
| chr15 | 66782964  | 66783003  | MAP2K1_7939  | + | GTGACCTATGCACCAGACGTAGCAACAAAGAGCGGATCCCCCTGCGGGTGGTTTCCATGAGATCGGAAGAGCGGTTTCAG     |
| chr19 | 52693438  | 52693477  | PPP2R1A_7940 | + | GTGACCTATGCACCAGACGTGAGCGGGACTTGGGGAAGACGCGGGGTACCTGGGGAGATCGGAAGAGCGGTTTCAG         |
| chr19 | 52705298  | 52705337  | PPP2R1A_7941 | + | GTGACCTATGCACCAGACGTGGACCCCTGGGGCCAGATGTGGGGACTCTTGGGAGGTGGAGATCGGAAGAGCGGTTTCAG     |
| chr19 | 52709327  | 52709366  | PPP2R1A_7942 | + | GTGACCTATGCACCAGACGTGGCAGGAAGTCTCTTGGCCACCCCTTAGGGTGGGCCATAGATCGGAAGAGCGGTTTCAG      |
| chr19 | 52714756  | 52714795  | PPP2R1A_7943 | + | GTGACCTATGCACCAGACGTGCTCTGGAAGCTCCAAGCTCCCATCTCAGCTCCAACAGATCGGAAGAGCGGTTTCAG        |
| chr19 | 52716097  | 52716136  | PPP2R1A_7944 | + | GTGACCTATGCACCAGACGTCCTTCCGTCCTGCTCTCCCTCTCTCTGGTGGTTTCTTAGATCGGAAGAGCGGTTTCAG       |
| chr19 | 52716374  | 52716413  | PPP2R1A_7945 | + | GTGACCTATGCACCAGACGTGACCTGACCTGCTCCACTGGTGGGACACTGACACTCAGATCGGAAGAGCGGTTTCAG        |
| chr19 | 52719157  | 52719196  | PPP2R1A_7946 | + | GTGACCTATGCACCAGACGTGACGCGGCAACACAGCAAGTGGGGTGGGTATCCAAGGGCAGATCGGAAGAGCGGTTTCAG     |

|       |           |           |              |   |                                                                                         |
|-------|-----------|-----------|--------------|---|-----------------------------------------------------------------------------------------|
| chr19 | 52719338  | 52719377  | PPP2R1A_7947 | + | GTGACCTATGCACCAGACGTGTTTGTATGGGAGGAACCAAGTGGATCCGAGCCTGCCAAAAAGATCGGAAGAGCGGTTTCAG      |
| chr19 | 52719927  | 52719966  | PPP2R1A_7948 | + | GTGACCTATGCACCAGACGTCAGGATCTCAGCTCTGGGTTTGTGGAGGGGACAGGCGGGTAGATCGGAAGAGCGGTTTCAG       |
| chr19 | 52723128  | 52723167  | PPP2R1A_7949 | + | GTGACCTATGCACCAGACGTAGGCCTGGGGGCCAGGCAGTGTCTGCCTCAGGGGAGGTGCAAGATCGGAAGAGCGGTTTCAG      |
| chr19 | 52723513  | 52723552  | PPP2R1A_7950 | + | GTGACCTATGCACCAGACGTTACAGGAGCAGCAAGAGGAGATGGGAGCTCCAGAAAGGCAGATCGGAAGAGCGGTTTCAG        |
| chr19 | 52724397  | 52724436  | PPP2R1A_7951 | + | GTGACCTATGCACCAGACGTCACCTGCCTGCTGGCCATCCCTAGGGAAGTGGAGCGCGTAGATCGGAAGAGCGGTTTCAG        |
| chr19 | 52725505  | 52725544  | PPP2R1A_7952 | + | GTGACCTATGCACCAGACGTGATACTCCCCACACACTGGCAGGGCTTCTTGTGGGCACAGATCGGAAGAGCGGTTTCAG         |
| chr19 | 52729072  | 52729111  | PPP2R1A_7953 | + | GTGACCTATGCACCAGACGTGAAAAGCAGCCAGCCCTAGCAGGAGGGTGGACTTTGAGGACAGATCGGAAGAGCGGTTTCAG      |
| chr19 | 52729245  | 52729284  | PPP2R1A_7954 | + | GTGACCTATGCACCAGACGTGGAGCAAACACTGGCCTCTGGTGTCCACCCTCAACCCCCAGATCGGAAGAGCGGTTTCAG        |
| chr1  | 186643905 | 186643944 | PTGS2_7955   | + | GTGACCTATGCACCAGACGTGATGAAGACAGAGATACAACCAATGTCAAACCTCACAAAAAGATCGGAAGAGCGGTTTCAG       |
| chr1  | 186644539 | 186644578 | PTGS2_7956   | + | GTGACCTATGCACCAGACGTTAAAATTAGTTGTAAAACAAGAATTTTAGGCATATTTACTAGATCGGAAGAGCGGTTTCAG       |
| chr1  | 186645327 | 186645366 | PTGS2_7957   | + | GTGACCTATGCACCAGACGTAAAATAAATAAAAAACATTTATTGTCATCTGATCACAAGAGATCGGAAGAGCGGTTTCAG        |
| chr1  | 186646059 | 186646098 | PTGS2_7958   | + | GTGACCTATGCACCAGACGTGAAAAATTTAATTTTGTGGTCTGTGAAGTTTTCTTAAGATCGGAAGAGCGGTTTCAG           |
| chr1  | 186646973 | 186647012 | PTGS2_7959   | + | GTGACCTATGCACCAGACGTAGAAGCTAAGGTAAAGATCCATCTATGTATTCAAGAAAGAGATCGGAAGAGCGGTTTCAG        |
| chr1  | 186647547 | 186647586 | PTGS2_7960   | + | GTGACCTATGCACCAGACGTCAAAGAAAAAATGTTTTATTTATTCTCATTTGTTAAGTAAGATCGGAAGAGCGGTTTCAG        |
| chr1  | 186648344 | 186648383 | PTGS2_7961   | + | GTGACCTATGCACCAGACGTACGAAGAAAGGGAGGGAGAAATTAATGGGACTCATTATAAGATCGGAAGAGCGGTTTCAG        |
| chr1  | 186648581 | 186648620 | PTGS2_7962   | + | GTGACCTATGCACCAGACGTAGGACAGCAATAAATCATTCTCTAGTGTCTTAATCTTAAAGATCGGAAGAGCGGTTTCAG        |
| chr1  | 186649433 | 186649472 | PTGS2_7963   | + | GTGACCTATGCACCAGACGTGGCAGGGCGCGCGGGGTAGGCTTTGCTGTCTGAGGGAGATCGGAAGAGCGGTTTCAG           |
| chr1  | 154936418 | 154936457 | SHC1_7964    | + | GTGACCTATGCACCAGACGTGGGAAGGAGGCTCAATTCAGGTGAAGAGTCAAATAAGAGATCGGAAGAGCGGTTTCAG          |
| chr1  | 154938268 | 154938307 | SHC1_7965    | + | GTGACCTATGCACCAGACGTAGAGGGAGGGTGGAGGGGAAGTAGCAGGCAACAACACACACACAGATCGGAAGAGCGGTTTCAG    |
| chr1  | 154938564 | 154938603 | SHC1_7966    | + | GTGACCTATGCACCAGACGTAAAGGGAGGCTCTACAGTGTCCAGCCCTGCCTCCAACACAGATCGGAAGAGCGGTTTCAG        |
| chr1  | 154938567 | 154938606 | SHC1_7967    | + | GTGACCTATGCACCAGACGTGGAGGCTCTACAGTGTCCAGCCCTGCCTCCAACACTCCAGATCGGAAGAGCGGTTTCAG         |
| chr1  | 154938718 | 154938757 | SHC1_7968    | + | GTGACCTATGCACCAGACGTAAAATAAAGGTGAGACCAGAAGCCCTAACCAACCACTCCAGATCGGAAGAGCGGTTTCAG        |
| chr1  | 154939004 | 154939043 | SHC1_7969    | + | GTGACCTATGCACCAGACGTGGACAGTGAAGCTGTGGCTGTAATGTGTGGTGGCAGGAAGATCGGAAGAGCGGTTTCAG         |
| chr1  | 154940284 | 154940323 | SHC1_7970    | + | GTGACCTATGCACCAGACGTGAGGAGGCTGTGAGTGTGAGCTCAGGCCACTGGGAGGAGGATCGGAAGAGCGGTTTCAG         |
| chr1  | 154940518 | 154940557 | SHC1_7971    | + | GTGACCTATGCACCAGACGTAGGTCAAATAAATTTTACAGTTCTACTTTACTCTGACCCAGATCGGAAGAGCGGTTTCAG        |
| chr1  | 154940744 | 154940783 | SHC1_7972    | + | GTGACCTATGCACCAGACGTGGGCAGGGGATGAAGAAGGAAGGAATGCCATGTGTCAGGAGATCGGAAGAGCGGTTTCAG        |
| chr1  | 154941101 | 154941140 | SHC1_7973    | + | GTGACCTATGCACCAGACGTGCCAGGGTCTCAGAAGGTGAGGGTTCACAGCAGAGGCAAGATCGGAAGAGCGGTTTCAG         |
| chr1  | 154941321 | 154941360 | SHC1_7974    | + | GTGACCTATGCACCAGACGTAGGGGTACTCAGACCCAGCGCTGCCTGCCTGCCACAGATCGGAAGAGCGGTTTCAG            |
| chr1  | 154941935 | 154941974 | SHC1_7975    | + | GTGACCTATGCACCAGACGTGGAGAAGGACAGCAGTCCAGCCCTCCCCACCCAGATCGGAAGAGCGGTTTCAG               |
| chr1  | 154942683 | 154942722 | SHC1_7976    | + | GTGACCTATGCACCAGACGTAGGGGTAGGGGCGCTGAGTCTGCGAAGTGGATCTGAACAAGATCGGAAGAGCGGTTTCAG        |
| chr1  | 154943013 | 154943052 | SHC1_7977    | + | GTGACCTATGCACCAGACGTAAAGAGGGGCTGCTGCCAGCCTGGCCCCCTGCCAGTTTAGATCGGAAGAGCGGTTTCAG         |
| chr2  | 1418285   | 1418324   | TPO_7978     | + | GTGACCTATGCACCAGACGTAAACACATTTGCGGCTTCTGGCCTTATAAAGTTATTTTTCAAGATCGGAAGAGCGGTTTCAG      |
| chr2  | 1426912   | 1426951   | TPO_7979     | + | GTGACCTATGCACCAGACGTGGGAGGGCGCCGCCAAATGCCACCGACAGGCGCATCAGATCGGAAGAGCGGTTTCAG           |
| chr2  | 1437390   | 1437429   | TPO_7980     | + | GTGACCTATGCACCAGACGTCCCTCTCCCACTGAGGACGGCAACTCCGAAGGAGGAAGATCGGAAGAGCGGTTTCAG           |
| chr2  | 1440167   | 1440206   | TPO_7981     | + | GTGACCTATGCACCAGACGTGGATTTTTCTTAATCTTCTGTCGTAAGTGGATCTGAACAAGATCGGAAGAGCGGTTTCAG        |
| chr2  | 1457606   | 1457645   | TPO_7982     | + | GTGACCTATGCACCAGACGTAGAACGCTACTATCCTGGACTAAGATTGGGTCTGTGATGAGATCGGAAGAGCGGTTTCAG        |
| chr2  | 1460065   | 1460104   | TPO_7983     | + | GTGACCTATGCACCAGACGTGAAAACGTTTCTATGTTTGTATGAAACTAAGTGTCTATTAGATCGGAAGAGCGGTTTCAG        |
| chr2  | 1481387   | 1481426   | TPO_7984     | + | GTGACCTATGCACCAGACGTTGGTCTGGGCGCCCTGGGTGGCTGCGGGCAAAGCGGGGAGATCGGAAGAGCGGTTTCAG         |
| chr2  | 1491774   | 1491813   | TPO_7985     | + | GTGACCTATGCACCAGACGTTCCCTTCCCTTGCACACCTCATGCAGCTGCTGCGGGATTTGAGATCGGAAGAGCGGTTTCAG      |
| chr2  | 1497822   | 1497861   | TPO_7986     | + | GTGACCTATGCACCAGACGTATCCAGAGCGTCTTCTTACGTTCTGCACAGAGGCAGGTAGATCGGAAGAGCGGTTTCAG         |
| chr2  | 1499980   | 1500019   | TPO_7987     | + | GTGACCTATGCACCAGACGTGTCTCCTCTCACACCAGTTACAGCATGTCATCTCATCAAGATCGGAAGAGCGGTTTCAG         |
| chr2  | 1500548   | 1500587   | TPO_7988     | + | GTGACCTATGCACCAGACGTTCTTCAATGACAATTACAAAACATCTGAATGTTTCCGATAAGATCGGAAGAGCGGTTTCAG       |
| chr2  | 1507862   | 1507901   | TPO_7989     | + | GTGACCTATGCACCAGACGTTCCCTCTCTCTGTCCGTCCATTTGCGAGTTTTTGAAGATCGGAAGAGCGGTTTCAG            |
| chr2  | 1520765   | 1520804   | TPO_7990     | + | GTGACCTATGCACCAGACGTCACTTTTGACTGTTACTTAGACACAAGCAATCTCCTTTAGATCGGAAGAGCGGTTTCAG         |
| chr2  | 1544506   | 1544545   | TPO_7991     | + | GTGACCTATGCACCAGACGTCCATGCCGCATGTTTCCAGCTGCCACCCGAGTGGTTGGACAGATCGGAAGAGCGGTTTCAG       |
| chr2  | 1546257   | 1546296   | TPO_7992     | + | GTGACCTATGCACCAGACGTGCAGGACCTGCAGAACCTGCAGAACGTTTCATGTTCCAAAATCACCAGATCGGAAGAGCGGTTTCAG |
| chr2  | 1481127   | 1481166   | TPO_7993     | + | GTGACCTATGCACCAGACGTCTGCCCTTCTGTCGCCACCGCGCCCTGCGGCCTGTGCGAGATCGGAAGAGCGGTTTCAG         |
| chr9  | 100437880 | 100437919 | XPA_7994     | + | GTGACCTATGCACCAGACGTAATTTTAAAGTCATCTTTTTCAGTGGTGTCTATTAGGTGAAAGATCGGAAGAGCGGTTTCAG      |
| chr9  | 100447333 | 100447372 | XPA_7995     | + | GTGACCTATGCACCAGACGTAAATCCATATTTAAATAAGTTGTGATTAGACTTGCAAAAAGATCGGAAGAGCGGTTTCAG        |
| chr9  | 100449554 | 100449593 | XPA_7996     | + | GTGACCTATGCACCAGACGTATTAAGTCCATTATATAAATTAGTTATTTTAAATAAGCTAAGATCGGAAGAGCGGTTTCAG       |
| chr9  | 100451932 | 100451971 | XPA_7997     | + | GTGACCTATGCACCAGACGTGAAAATGAACCTAGTTTCTTTTTTATGACTAGAACATATAGATCGGAAGAGCGGTTTCAG        |
| chr9  | 100456052 | 100456091 | XPA_7998     | + | GTGACCTATGCACCAGACGTGAGTAAAGCAGTCAACAATTAAGTAGTAAAGCCTGTATAGATCGGAAGAGCGGTTTCAG         |
| chr9  | 100459585 | 100459624 | XPA_7999     | + | GTGACCTATGCACCAGACGTCTCCGAGGACCTAGCTCCCAGCTCCACGCACGCGCACTGCAGATCGGAAGAGCGGTTTCAG       |
| chr3  | 14187670  | 14187709  | XPC_8000     | + | GTGACCTATGCACCAGACGTGGCAGTGGTGGGAGGACACAGGCGAGGGTTAGTAATCAGAAGATCGGAAGAGCGGTTTCAG       |
| chr3  | 14188890  | 14188929  | XPC_8001     | + | GTGACCTATGCACCAGACGTAAATGAAGTGGGAGAAAAGTGTAAAGCACTGACATTTTCAAGATCGGAAGAGCGGTTTCAG       |
| chr3  | 14189512  | 14189551  | XPC_8002     | + | GTGACCTATGCACCAGACGTACAACGCGATGTCAACCCCTCGAACCTGCTGCCTGCTGCAGATCGGAAGAGCGGTTTCAG        |
| chr3  | 14190242  | 14190281  | XPC_8003     | + | GTGACCTATGCACCAGACGTTGACCAAGTCAAGTATGGCCAGCAGGGGAACAAGGCGGACATCGGAAGAGCGGTTTCAG         |
| chr3  | 14190459  | 14190498  | XPC_8004     | + | GTGACCTATGCACCAGACGTTGACACGGCCACTGTTTACAACAAGGCATCCAGTTCTCAGATCGGAAGAGCGGTTTCAG         |

|       |           |           |            |   |                                                                                     |
|-------|-----------|-----------|------------|---|-------------------------------------------------------------------------------------|
| chr3  | 14193927  | 14193966  | XPC_8005   | + | GTGACCTATGCACCAGACGTAACACAGGACACAAAGGTAAGTCTAGTCCACAGCCCCACTGAGATCGGAAGAGCGGTTTCAG  |
| chr3  | 14198006  | 14198045  | XPC_8006   | + | GTGACCTATGCACCAGACGTCAGACAGACAAAGTTGAGCATGTTATTAGAAAGAGGAAATAGATCGGAAGAGCGGTTTCAG   |
| chr3  | 14200403  | 14200442  | XPC_8007   | + | GTGACCTATGCACCAGACGTATAAGAAATTTTGCTTTTTTTTCTCCCCCTCTTTTGCTAAGATCGGAAGAGCGGTTTCAG    |
| chr3  | 14206444  | 14206483  | XPC_8008   | + | GTGACCTATGCACCAGACGTAGCAGGCATTCTTGTTGTGTCAGAGGTCAGGGCAAAGGGGAAAGATCGGAAGAGCGGTTTCAG |
| chr3  | 14207096  | 14207135  | XPC_8009   | + | GTGACCTATGCACCAGACGTGAAAAGGAAAGGGGCAGCATGGAAGGAAAGGCCGGACACCAGATCGGAAGAGCGGTTTCAG   |
| chr3  | 14208764  | 14208803  | XPC_8010   | + | GTGACCTATGCACCAGACGTGTAGTGAATAATCTGGAAATGAAGGGGGGAAGTCAAACAGAGATCGGAAGAGCGGTTTCAG   |
| chr3  | 14209787  | 14209826  | XPC_8011   | + | GTGACCTATGCACCAGACGTTGTTCAACTCTATCTCCACTGGCTTCCAGGTCAGGTCAGGAGAGATCGGAAGAGCGGTTTCAG |
| chr3  | 14209891  | 14209930  | XPC_8012   | + | GTGACCTATGCACCAGACGTGCATTTTTAAAAATCAGTAATAGTAATAACAATAATAAAGATCGGAAGAGCGGTTTCAG     |
| chr3  | 14212061  | 14212100  | XPC_8013   | + | GTGACCTATGCACCAGACGTACCACAGGAAGGAAGATGAAGAAGACTCAGACATCTAGTAGATCGGAAGAGCGGTTTCAG    |
| chr3  | 14214573  | 14214612  | XPC_8014   | + | GTGACCTATGCACCAGACGTACACAGAACATAAGGTGAGGGGTGGAAGGAAAGGTGGAAGGAGATCGGAAGAGCGGTTTCAG  |
| chr3  | 14220079  | 14220118  | XPC_8015   | + | GTGACCTATGCACCAGACGTTGGGGCAAATTCACCTTCGCGAGTGACGCACCCGGCCGCGAAGATCGGAAGAGCGGTTTCAG  |
| chr3  | 14199962  | 14200001  | XPC_8016   | + | GTGACCTATGCACCAGACGTTGAGGAGCGGGGGCTTCCCTCTGCTTTGGAGGGCCAGGTTAGATCGGAAGAGCGGTTTCAG   |
| chr6  | 69349335  | 69349374  | BAI3_8017  | + | GTGACCTATGCACCAGACGTGAAGAGAGGGGAGGTGACGCGGGGAGCACTTTTGGGGATAGATCGGAAGAGCGGTTTCAG    |
| chr6  | 69640572  | 69640611  | BAI3_8018  | + | GTGACCTATGCACCAGACGTAGTTACATTTTTCTATTATTGTTGTTAATTAATGAAACAGATCGGAAGAGCGGTTTCAG     |
| chr6  | 69646583  | 69646622  | BAI3_8019  | + | GTGACCTATGCACCAGACGTCAGCAACTACAACGTGGATGTTATTGAATTGTGTCATGCAGATCGGAAGAGCGGTTTCAG    |
| chr6  | 69653897  | 69653936  | BAI3_8020  | + | GTGACCTATGCACCAGACGTTCTGCATTTGGTTATGTTTGCATTATGTCTTTTTATATGAGATCGGAAGAGCGGTTTCAG    |
| chr6  | 69666091  | 69666130  | BAI3_8021  | + | GTGACCTATGCACCAGACGTATTCCTGCATATCTGGGCATCTGATCCATGTAAGGGCAAGATCGGAAGAGCGGTTTCAG     |
| chr6  | 69666712  | 69666751  | BAI3_8022  | + | GTGACCTATGCACCAGACGTACCCAAATTTCCAAAGAACATTTCCATAACGTGAAAAGATCGGAAGAGCGGTTTCAG       |
| chr6  | 69684767  | 69684806  | BAI3_8023  | + | GTGACCTATGCACCAGACGTATGACCACCCCAACCCTAGTGATAATCCCATCCAAAGAAAGATCGGAAGAGCGGTTTCAG    |
| chr6  | 69685243  | 69685282  | BAI3_8024  | + | GTGACCTATGCACCAGACGTAGCCAGCTTTAGTACTTGCTCTGTTTATTTTTGCTAATGAGATCGGAAGAGCGGTTTCAG    |
| chr6  | 69703865  | 69703904  | BAI3_8025  | + | GTGACCTATGCACCAGACGTCAAGTTCGTGAAGGAAAGGGCTAGTGAAGATGCAATCAGTAGATCGGAAGAGCGGTTTCAG   |
| chr6  | 69724009  | 69724048  | BAI3_8026  | + | GTGACCTATGCACCAGACGTGGTTATTTGAGAACTTGAAGTTGGCAAACAAAGTGTAAAAGATCGGAAGAGCGGTTTCAG    |
| chr6  | 69728402  | 69728441  | BAI3_8027  | + | GTGACCTATGCACCAGACGTGGATTTTCCCCAAAATCTTTGAAATGAAAAAATTTGAGATCGGAAGAGCGGTTTCAG       |
| chr6  | 69758237  | 69758276  | BAI3_8028  | + | GTGACCTATGCACCAGACGTGAAATGATGAGCTTGAACAAAGACATTTTTGATAAGTTCAGATCGGAAGAGCGGTTTCAG    |
| chr6  | 69759249  | 69759288  | BAI3_8029  | + | GTGACCTATGCACCAGACGTAAAGTAATAAACTGTTGTAATTTGTAATTTTCCAAAATAGATCGGAAGAGCGGTTTCAG     |
| chr6  | 69772939  | 69772978  | BAI3_8030  | + | GTGACCTATGCACCAGACGTTCCACTGGGCACTGACTTGCTTATGGAATTACCTTTCAAAGATCGGAAGAGCGGTTTCAG    |
| chr6  | 69785941  | 69785980  | BAI3_8031  | + | GTGACCTATGCACCAGACGTGATGTTTTCTACATTACTTTGGGCTAAATTTCAAAGCAAGATCGGAAGAGCGGTTTCAG     |
| chr6  | 69943319  | 69943358  | BAI3_8032  | + | GTGACCTATGCACCAGACGTAAAGGAAAAACCGGCTTTAACGCAAGACAGGGATATTGTAGATCGGAAGAGCGGTTTCAG    |
| chr6  | 69945038  | 69945077  | BAI3_8033  | + | GTGACCTATGCACCAGACGTAATTGATAGACTGAAATGCAATGCTTAGTTGTTTCATAGATCGGAAGAGCGGTTTCAG      |
| chr6  | 69949129  | 69949168  | BAI3_8034  | + | GTGACCTATGCACCAGACGTTAATTACTGATTTCTTTTTTGTTTATATTTTGGCATTAGATCGGAAGAGCGGTTTCAG      |
| chr6  | 70034925  | 70034964  | BAI3_8035  | + | GTGACCTATGCACCAGACGTTGATATACCGTTTCATGCTCTTCTCAAATGACGTTGAACAGATCGGAAGAGCGGTTTCAG    |
| chr6  | 70037792  | 70037831  | BAI3_8036  | + | GTGACCTATGCACCAGACGTCACAGAGATAAATCATGTTTATAATTTAACAAATCATCAAGATCGGAAGAGCGGTTTCAG    |
| chr6  | 70040475  | 70040514  | BAI3_8037  | + | GTGACCTATGCACCAGACGTTAAATCAACGATTTTTGTTTTCTTAGGAAAAAAGAAAGATCGGAAGAGCGGTTTCAG       |
| chr6  | 70042911  | 70042950  | BAI3_8038  | + | GTGACCTATGCACCAGACGTTGGTGGATTTTGAAGTTTATTTATCAGTGAATCCCATAGATCGGAAGAGCGGTTTCAG      |
| chr6  | 70048917  | 70048956  | BAI3_8039  | + | GTGACCTATGCACCAGACGTATTCATTACATCTTCTGTTTACAATCTTTACAGTGCATAGATCGGAAGAGCGGTTTCAG     |
| chr6  | 70049407  | 70049446  | BAI3_8040  | + | GTGACCTATGCACCAGACGTTTCTGTGATAGAGAACAGTGATGTTGGAATGGTATTTTCAGATCGGAAGAGCGGTTTCAG    |
| chr6  | 70064231  | 70064270  | BAI3_8041  | + | GTGACCTATGCACCAGACGTTATTTTTCCCGATTGTTAATTAACCTCATGTTTCTCAAGGAGATCGGAAGAGCGGTTTCAG   |
| chr6  | 70065763  | 70065802  | BAI3_8042  | + | GTGACCTATGCACCAGACGTTTAGATTTTGAATCTAATCAGTAGGGATGTTCAATCATTAGATCGGAAGAGCGGTTTCAG    |
| chr6  | 70071415  | 70071454  | BAI3_8043  | + | GTGACCTATGCACCAGACGTGAAGATTAATTTTTCTTGATAGTTGAAATATGAATAGAAGATCGGAAGAGCGGTTTCAG     |
| chr6  | 70082344  | 70082383  | BAI3_8044  | + | GTGACCTATGCACCAGACGTGAATTTTGAATGTAATTAAGTGAATCAAATAAGATCGGAAGAGCGGTTTCAG            |
| chr6  | 70092838  | 70092877  | BAI3_8045  | + | GTGACCTATGCACCAGACGTTTGTCTTCAATGCCTGAGTAGAAGATGCATCATGTCAGATAGATCGGAAGAGCGGTTTCAG   |
| chr6  | 70098794  | 70098833  | BAI3_8046  | + | GTGACCTATGCACCAGACGTATGGACTAAGGTAGAGACAAAACCTTTATTGCACTGACACTAGATCGGAAGAGCGGTTTCAG  |
| chr6  | 69348956  | 69348995  | BAI3_8047  | + | GTGACCTATGCACCAGACGTTAGTCTGATGATTTCCAACATAATTTCCAGGATACAGAAAGATCGGAAGAGCGGTTTCAG    |
| chr6  | 70071093  | 70071132  | BAI3_8048  | + | GTGACCTATGCACCAGACGTGTGATGCCAGAAAGTTCTGTAAATAACCAGCCTTCAATGAAGATCGGAAGAGCGGTTTCAG   |
| chr2  | 215593743 | 215593782 | BARD1_8049 | + | GTGACCTATGCACCAGACGTGAGAAAAATTTGTTAAAGGCAGATCAAATACTGTATTTCAGATCGGAAGAGCGGTTTCAG    |
| chr2  | 215595243 | 215595282 | BARD1_8050 | + | GTGACCTATGCACCAGACGTCACAAAGAAATTAAGCAAACTAAGTATCAAGTGAAGATAGATCGGAAGAGCGGTTTCAG     |
| chr2  | 215609894 | 215609933 | BARD1_8051 | + | GTGACCTATGCACCAGACGTAAAAAGCAGTAAGAGAAAAGAAAGATACAAGCCAAAGTATAGATCGGAAGAGCGGTTTCAG   |
| chr2  | 215610589 | 215610628 | BARD1_8052 | + | GTGACCTATGCACCAGACGTAAAAAGGAGATACCAGTGTAAAAACATTAGACGACTAGACAGATCGGAAGAGCGGTTTCAG   |
| chr2  | 215617290 | 215617329 | BARD1_8053 | + | GTGACCTATGCACCAGACGTAAAGTGCAGATGTGTTAAGTAAGTCAAATGTGTGACTCGAAGATCGGAAGAGCGGTTTCAG   |
| chr2  | 215632389 | 215632428 | BARD1_8054 | + | GTGACCTATGCACCAGACGTTTTTTGAAAAAGAGTGAAGAAGTGATAAGAAAGAGCAAAGATCGGAAGAGCGGTTTCAG     |
| chr2  | 215634047 | 215634086 | BARD1_8055 | + | GTGACCTATGCACCAGACGTGAACAAAACGAAATTAAGCAATTAAGGAAAGAAAGAGATCGGAAGAGCGGTTTCAG        |
| chr2  | 215646244 | 215646283 | BARD1_8056 | + | GTGACCTATGCACCAGACGTAAAGAAAAAAGAAATCTGTATCATGAAATTTATTGCTCCAGATCGGAAGAGCGGTTTCAG    |
| chr2  | 215661852 | 215661891 | BARD1_8057 | + | GTGACCTATGCACCAGACGTAAATTAACAATCAAGATTTGAGTCATTGTTAGATAAACAGATCGGAAGAGCGGTTTCAG     |
| chr2  | 215674304 | 215674343 | BARD1_8058 | + | GTGACCTATGCACCAGACGTTCCGATGAAAGGCTCCTCGCAGAGCGGGAAGCAAGGAAGCAGATCGGAAGAGCGGTTTCAG   |
| chr2  | 215645769 | 215645808 | BARD1_8059 | + | GTGACCTATGCACCAGACGTGATTAACCTCCAAAACATTAGATTTCTGTCAGGAGCCAGATCGGAAGAGCGGTTTCAG      |
| chr18 | 60796003  | 60796042  | BCL2_8060  | + | GTGACCTATGCACCAGACGTGGGAGAGGAGGGAAGAAAAGAAAGAGTATTAGAGAGAAAGATCGGAAGAGCGGTTTCAG     |
| chr18 | 60985910  | 60985949  | BCL2_8061  | + | GTGACCTATGCACCAGACGTGGAAGCAACGGGGCCACCGCCACTCTCGCCCCAGCTAGATCGGAAGAGCGGTTTCAG       |
| chr18 | 60985601  | 60985640  | BCL2_8062  | + | GTGACCTATGCACCAGACGTGCCTGGCGAGGGTCAAGTGCAGCCACAGGTGGCACCGGGCAGATCGGAAGAGCGGTTTCAG   |

|       |          |          |            |   |                                                                                     |
|-------|----------|----------|------------|---|-------------------------------------------------------------------------------------|
| chr19 | 11015763 | 11015802 | CARM1_8063 | + | GTGACCTATGCACCAGACGTCTCCTTCCATTCCGGTGACACCAGCCAAAGCGCCCAGAGAGATCGGAAGAGCGGTTTCAG    |
| chr19 | 11018832 | 11018871 | CARM1_8064 | + | GTGACCTATGCACCAGACGTCTCCCCCTCAGCCAGGCCGCCTCCCCCGGCAGCCCCCTAGATCGGAAGAGCGGTTTCAG     |
| chr19 | 11019894 | 11019933 | CARM1_8065 | + | GTGACCTATGCACCAGACGTGCGCGCATGTGCCACCTCTCTGCTTCTGTCTCGGTTTTTTAGATCGGAAGAGCGGTTTCAG   |
| chr19 | 11022981 | 11023020 | CARM1_8066 | + | GTGACCTATGCACCAGACGTGCGTGGTGCCACCCAGCCTCGTCTCGCCATGAGTGCCAGATCGGAAGAGCGGTTTCAG      |
| chr19 | 11024741 | 11024780 | CARM1_8067 | + | GTGACCTATGCACCAGACGTGGGGGTACACAGGCCAGCCCCCTCGGTGGAGGCCCTGGCTAGATCGGAAGAGCGGTTTCAG   |
| chr19 | 11027184 | 11027223 | CARM1_8068 | + | GTGACCTATGCACCAGACGTCTGGGTGTCCCGCTGGCCGCCACAGCCTGCCTTCTCAGAGATCGGAAGAGCGGTTTCAG     |
| chr19 | 11030653 | 11030692 | CARM1_8069 | + | GTGACCTATGCACCAGACGTGACAGCAGCCATGCTGGCTCCCTCCCACTCCAGGGCTTAGATCGGAAGAGCGGTTTCAG     |
| chr19 | 11031260 | 11031299 | CARM1_8070 | + | GTGACCTATGCACCAGACGTCCCTGGGGCTGGTGGTGGTGGGAGGGGTCATCTGCCAGATCGGAAGAGCGGTTTCAG       |
| chr19 | 11031435 | 11031474 | CARM1_8071 | + | GTGACCTATGCACCAGACGTCCCTTGCTGCACAGGGGGCGCCCGGCCCTGCAACCCAGATCGGAAGAGCGGTTTCAG       |
| chr19 | 11031633 | 11031672 | CARM1_8072 | + | GTGACCTATGCACCAGACGTCCCACCCCAATGCCAGCCAAACCCGGGAGGCCGCCCTCGCAGATCGGAAGAGCGGTTTCAG   |
| chr19 | 11031814 | 11031853 | CARM1_8073 | + | GTGACCTATGCACCAGACGTCCCAGGGCCAGGGGAGCCAGTGCACAGGACTGCCAGGACTGCAGATCGGAAGAGCGGTTTCAG |
| chr19 | 11032130 | 11032169 | CARM1_8074 | + | GTGACCTATGCACCAGACGTGGCGGGGGCAGGGGCCCTGGGGCGCAGCTAGCGTGTGAAGATCGGAAGAGCGGTTTCAG     |
| chr12 | 56360919 | 56360958 | CDK2_8075  | + | GTGACCTATGCACCAGACGTGTGACCCGGGACTCCTAACTGGGGACTCCTTGATTGTAGATCGGAAGAGCGGTTTCAG      |
| chr12 | 56361729 | 56361768 | CDK2_8076  | + | GTGACCTATGCACCAGACGTGCTGAGAGGTGATCCAGCTGGAAGGAGGATAAGTTCTGAGATCGGAAGAGCGGTTTCAG     |
| chr12 | 56361964 | 56362003 | CDK2_8077  | + | GTGACCTATGCACCAGACGTTCATCAGTCTCTCATCATGGCATGTCTTGGGGACTGAGATCGGAAGAGCGGTTTCAG       |
| chr12 | 56362743 | 56362782 | CDK2_8078  | + | GTGACCTATGCACCAGACGTTCATGCTTTTTCTCTGAGCTTCCAAGAGGTGTTAACTAGATCGGAAGAGCGGTTTCAG      |
| chr12 | 56363371 | 56363410 | CDK2_8079  | + | GTGACCTATGCACCAGACGTTCGCCCCAAGTTCCACCCAGCCCTCCCTCTCTCCACAGATCGGAAGAGCGGTTTCAG       |
| chr12 | 56365042 | 56365081 | CDK2_8080  | + | GTGACCTATGCACCAGACGTGACCTGTTCCTCATTCTTCTCCAGGGGAGCTAGATCGGAAGAGCGGTTTCAG            |
| chr12 | 56365420 | 56365459 | CDK2_8081  | + | GTGACCTATGCACCAGACGTGAAGCCCCAGCCCTAATCTACCCTCTCTCCAGTGTGGAGATCGGAAGAGCGGTTTCAG      |
| chr22 | 47083114 | 47083153 | CERK_8082  | + | GTGACCTATGCACCAGACGTAAAGCGCCACGTGTAACCCACAGTGTCCCTCACTCAAAGAGATCGGAAGAGCGGTTTCAG    |
| chr22 | 47086108 | 47086147 | CERK_8083  | + | GTGACCTATGCACCAGACGTACAGTGAGAGGGACCATTACAGCTCAAAGCTCATCGTCTGAGATCGGAAGAGCGGTTTCAG   |
| chr22 | 47087685 | 47087724 | CERK_8084  | + | GTGACCTATGCACCAGACGTAAAGAACCACGGAGATGTCACAGTTACAATGGCGCCGGGCAAGATCGGAAGAGCGGTTTCAG  |
| chr22 | 47089411 | 47089450 | CERK_8085  | + | GTGACCTATGCACCAGACGTAGAATATCATCACTTTTTAAATATGGAGCTGCAGGTGCAGATCGGAAGAGCGGTTTCAG     |
| chr22 | 47091223 | 47091262 | CERK_8086  | + | GTGACCTATGCACCAGACGTAGTCAGTGAAGAAATAACATCCAAAGGGTCACTTGATTGAGATCGGAAGAGCGGTTTCAG    |
| chr22 | 47095373 | 47095412 | CERK_8087  | + | GTGACCTATGCACCAGACGTGAACGGCCGTGAGGGAAGGCAGCCCCCTCCAGCCCCCAGATCGGAAGAGCGGTTTCAG      |
| chr22 | 47097618 | 47097657 | CERK_8088  | + | GTGACCTATGCACCAGACGTAAAAGAAGGTCCCAAATAGCATCAGAATAACAGAATTGTAGATCGGAAGAGCGGTTTCAG    |
| chr22 | 47103896 | 47103935 | CERK_8089  | + | GTGACCTATGCACCAGACGTAAACACAGCCGGTCAAGGGCTCCTGCAGGTGCGGCCCTCTGAAGATCGGAAGAGCGGTTTCAG |
| chr22 | 47107057 | 47107096 | CERK_8090  | + | GTGACCTATGCACCAGACGTAAATACATCACACATTTTATTTACATCTGTGAGTCTAGATCGGAAGAGCGGTTTCAG       |
| chr22 | 47108201 | 47108240 | CERK_8091  | + | GTGACCTATGCACCAGACGTACAACATGTAATAACAAACAAATAACAAAATCAAACAGATCGGAAGAGCGGTTTCAG       |
| chr22 | 47116116 | 47116155 | CERK_8092  | + | GTGACCTATGCACCAGACGTGCAACGATCTCGTTAGTGCAAAAGTTTTGCAGGGTCACTGAAGATCGGAAGAGCGGTTTCAG  |
| chr22 | 47116923 | 47116962 | CERK_8093  | + | GTGACCTATGCACCAGACGTACCACGTCTTCTGTCAAAGAATTCGTGAGAATCCACACAAGATCGGAAGAGCGGTTTCAG    |
| chr22 | 47134056 | 47134095 | CERK_8094  | + | GTGACCTATGCACCAGACGTGGGCTCGTCCGCCAGGCTGGGGGCGCGGAGCCGAGGAGATCGGAAGAGCGGTTTCAG       |
| chr11 | 46355048 | 46355087 | DGKZ_8095  | + | GTGACCTATGCACCAGACGTGCTGGGCGAGGGGAGCGCGGGCGCTTGGGACCACCCCTCTAGATCGGAAGAGCGGTTTCAG   |
| chr11 | 46367146 | 46367185 | DGKZ_8096  | + | GTGACCTATGCACCAGACGTGGGGTGGCTGGGAGTGGGATGGGACCTCTGTCCCTCAAGATCGGAAGAGCGGTTTCAG      |
| chr11 | 46369381 | 46369420 | DGKZ_8097  | + | GTGACCTATGCACCAGACGTGCGGCGCGGGGACGCCAGCCAGGCAAGGTTACCGCAGATCGGAAGAGCGGTTTCAG        |
| chr11 | 46388545 | 46388584 | DGKZ_8098  | + | GTGACCTATGCACCAGACGTCTGTGGCCAGCAGGGCGAGTGGTGTGACCTCTGTGGGTGAGATCGGAAGAGCGGTTTCAG    |
| chr11 | 46388960 | 46388999 | DGKZ_8099  | + | GTGACCTATGCACCAGACGTGAACACCCCTGGGTCCAGACCCTCTGGGCTCTTGCCAAAGATCGGAAGAGCGGTTTCAG     |
| chr11 | 46389308 | 46389347 | DGKZ_8100  | + | GTGACCTATGCACCAGACGTGTAGGGGCACGCCGCCCTGCTGGTGGAGCCAGTAGCCGAGATCGGAAGAGCGGTTTCAG     |
| chr11 | 46389640 | 46389679 | DGKZ_8101  | + | GTGACCTATGCACCAGACGTAGCTCAGCTTTGCCCGCCCCCTGCCCTTTGGGTGCTGAGGCAGATCGGAAGAGCGGTTTCAG  |
| chr11 | 46391111 | 46391150 | DGKZ_8102  | + | GTGACCTATGCACCAGACGTAGGTTGGTCCAGGATGGGGCCACCCTAAGATTCTGCATGAGATCGGAAGAGCGGTTTCAG    |
| chr11 | 46391570 | 46391609 | DGKZ_8103  | + | GTGACCTATGCACCAGACGTCTGCCCGGACATCGCCACCTGCACCTGCGGTCTGAGCAGATCGGAAGAGCGGTTTCAG      |
| chr11 | 46392945 | 46392984 | DGKZ_8104  | + | GTGACCTATGCACCAGACGTCCCCCGCCCCAGGGCCAGGCCCTGCACTGCTGGGTTTGGAGATCGGAAGAGCGGTTTCAG    |
| chr11 | 46393164 | 46393203 | DGKZ_8105  | + | GTGACCTATGCACCAGACGTCTGCACCCCTTGATGCCCGTACGCACCTTGGGTTCTGCCAAGATCGGAAGAGCGGTTTCAG   |
| chr11 | 46393336 | 46393375 | DGKZ_8106  | + | GTGACCTATGCACCAGACGTGGCTGGGCAGAGGCTGCAGGGGAGCAGGAGAGAGGGGTTCTAGATCGGAAGAGCGGTTTCAG  |
| chr11 | 46393731 | 46393770 | DGKZ_8107  | + | GTGACCTATGCACCAGACGTCTTGCCCTCAGCTAAGGGCTCGGGCGGGGGTTGGGTTGAGATCGGAAGAGCGGTTTCAG     |
| chr11 | 46394071 | 46394110 | DGKZ_8108  | + | GTGACCTATGCACCAGACGTGCCAAGTTTTGTGGGACAGTGGGGGGAACCTTGCCCTAAGATCGGAAGAGCGGTTTCAG     |
| chr11 | 46394238 | 46394277 | DGKZ_8109  | + | GTGACCTATGCACCAGACGTGCGATGGGCCAGCCGAGCAGGCTGGGCTGAAGCCGAGATCGGAAGAGCGGTTTCAG        |
| chr11 | 46394445 | 46394484 | DGKZ_8110  | + | GTGACCTATGCACCAGACGTATAGGAGGGGGTGCAGCTGGGGCTCTCCAGCCACAGAGATCGGAAGAGCGGTTTCAG       |
| chr11 | 46395796 | 46395835 | DGKZ_8111  | + | GTGACCTATGCACCAGACGTTCCTCACTGAGGCCAGGGCAGGGTGGGCACAGGAGTGTCCAGATCGGAAGAGCGGTTTCAG   |
| chr11 | 46396015 | 46396054 | DGKZ_8112  | + | GTGACCTATGCACCAGACGTCTGCACCCCGCCTGTGCCACCTCTTCTACCACCCGTGAGATCGGAAGAGCGGTTTCAG      |
| chr11 | 46396227 | 46396266 | DGKZ_8113  | + | GTGACCTATGCACCAGACGTCCAGCTGCCGTGGTGGTGGGCGGAGGGAGGAGGAGATCGGAAGAGCGGTTTCAG          |
| chr11 | 46396400 | 46396439 | DGKZ_8114  | + | GTGACCTATGCACCAGACGTGCTGACCGAGCTGGGGGAGGCCCTGCTGCTCTGCTGAGATCGGAAGAGCGGTTTCAG       |
| chr11 | 46396606 | 46396645 | DGKZ_8115  | + | GTGACCTATGCACCAGACGTCTGGGCCATGGTGCCTGGGAGCACAGCCAAAGGTGGAAGATCGGAAGAGCGGTTTCAG      |
| chr11 | 46397512 | 46397551 | DGKZ_8116  | + | GTGACCTATGCACCAGACGTGGGGCGCCCTGGCAGGGTGGCCAGAGGGGTGAAGCAGAGATCGGAAGAGCGGTTTCAG      |
| chr11 | 46397706 | 46397745 | DGKZ_8117  | + | GTGACCTATGCACCAGACGTGGGGCTCCCCAGGTGCCACCAGAGGGTGGTGGGAAGTAGATCGGAAGAGCGGTTTCAG      |
| chr11 | 46397958 | 46397997 | DGKZ_8118  | + | GTGACCTATGCACCAGACGTCCAGGGTGCCTGTTCTGTTCTCCCTCCCTAGGGGAGATCGGAAGAGCGGTTTCAG         |
| chr11 | 46398125 | 46398164 | DGKZ_8119  | + | GTGACCTATGCACCAGACGTGCCAGCTGCCAGCCAGCTGCTTCCGGCCCAAGGAGATCGGAAGAGCGGTTTCAG          |
| chr11 | 46399790 | 46399829 | DGKZ_8120  | + | GTGACCTATGCACCAGACGTCCCTCTGGGGCCCTCTTTCTGCTGGTGGGGGAGGATCGGAAGAGCGGTTTCAG           |

|       |           |           |            |   |                                                                                       |
|-------|-----------|-----------|------------|---|---------------------------------------------------------------------------------------|
| chr11 | 46400061  | 46400100  | DGKZ_8121  | + | GTGACCTATGCACCAGACGTGAGGCTCCAGTTCCTTCCCCAGCAGCTCCCTCGGGCCCTAGATCGGAAGAGCGGTTTCAG      |
| chr11 | 46400672  | 46400711  | DGKZ_8122  | + | GTGACCTATGCACCAGACGTGAGGAGCCAGGGCCCTGGGGCCAAGGTGGGAGGAGAGATCGGAAGAGCGGTTTCAG          |
| chr11 | 46400797  | 46400836  | DGKZ_8123  | + | GTGACCTATGCACCAGACGTGGGCGAGTGCAGAACCGTGGTACCCCGGAAACCACCTTTAGATCGGAAGAGCGGTTTCAG      |
| chr11 | 46401129  | 46401168  | DGKZ_8124  | + | GTGACCTATGCACCAGACGTGGCAGGCGAGGGAGCCACGAGGGCCACCAACCAACCTTTTCAGATCGGAAGAGCGGTTTCAG    |
| chr11 | 46401508  | 46401547  | DGKZ_8125  | + | GTGACCTATGCACCAGACGTACGGGCAGCAGGAGGGACAATCGCGCCAGGGGACGAGCGCAGATCGGAAGAGCGGTTTCAG     |
| chr11 | 46388181  | 46388220  | DGKZ_8126  | + | GTGACCTATGCACCAGACGTTGGTGGTAGCCGAGGCAATCGAGCGCCATCCAGCCAGGCCACCAAGATCGGAAGAGCGGTTTCAG |
| chr20 | 32264796  | 32264835  | E2F1_8127  | + | GTGACCTATGCACCAGACGTGGGGACCATCACAGCCGGGGATGCCCCAGCAGGGAAGATCGGAAGAGCGGTTTCAG          |
| chr20 | 32265357  | 32265396  | E2F1_8128  | + | GTGACCTATGCACCAGACGTTCAAGGACCACATGACCTTTGACTTCTAGGGGGTCACTCAAGATCGGAAGAGCGGTTTCAG     |
| chr20 | 32266170  | 32266209  | E2F1_8129  | + | GTGACCTATGCACCAGACGTGACCAGGGAGGGTAGGGTTAACAGCGATTGGCCCTCTGAGATCGGAAGAGCGGTTTCAG       |
| chr20 | 32267791  | 32267830  | E2F1_8130  | + | GTGACCTATGCACCAGACGTGTGGTCAAGGACAGGGCCCTTCAGCATCCACCCACAGATCGGAAGAGCGGTTTCAG          |
| chr20 | 32268233  | 32268272  | E2F1_8131  | + | GTGACCTATGCACCAGACGTAACGGGAGGATGCCAGTAACCCAGGAGTGAGGCCAGGAAGAAGATCGGAAGAGCGGTTTCAG    |
| chr3  | 89156997  | 89157036  | EPHA3_8132 | + | GTGACCTATGCACCAGACGTTACCGGCAGCAGCGGAGCTCTGCCCCGCGGGCTCACGCTAGATCGGAAGAGCGGTTTCAG      |
| chr3  | 89176434  | 89176473  | EPHA3_8133 | + | GTGACCTATGCACCAGACGTTAAACTATCACAAAGAAACATTTTCTCTATTACTGTCTTAGATCGGAAGAGCGGTTTCAG      |
| chr3  | 89259681  | 89259720  | EPHA3_8134 | + | GTGACCTATGCACCAGACGTTCTCTATTTTTCTTTGAGCAATATTTCTCACCTATGAGTTAGATCGGAAGAGCGGTTTCAG     |
| chr3  | 89390232  | 89390271  | EPHA3_8135 | + | GTGACCTATGCACCAGACGTTTGTGCAACCCATGCCTCCATGTTTGTGTTTTCTTCAGATCGGAAGAGCGGTTTCAG         |
| chr3  | 89391251  | 89391290  | EPHA3_8136 | + | GTGACCTATGCACCAGACGTACTAGATGCTTCTTACTTATCATATCACGCTCTGAGTAAAGATCGGAAGAGCGGTTTCAG      |
| chr3  | 89445122  | 89445161  | EPHA3_8137 | + | GTGACCTATGCACCAGACGTAATGTTTAAAGGTTGGGCTGTGTAGGCAAGAGCTGTTTCAGATCGGAAGAGCGGTTTCAG      |
| chr3  | 89448641  | 89448680  | EPHA3_8138 | + | GTGACCTATGCACCAGACGTTTTCAATGCAGTCTAGAGGGGGCAGGGATCTTGCAAAAGATCGGAAGAGCGGTTTCAG        |
| chr3  | 89448667  | 89448706  | EPHA3_8139 | + | GTGACCTATGCACCAGACGTAGGGATCTTGCAAAAGATGCTGATCGTTTATTCTCACTGAGATCGGAAGAGCGGTTTCAG      |
| chr3  | 89456532  | 89456571  | EPHA3_8140 | + | GTGACCTATGCACCAGACGTAGTCTGTTTCACTATTCACTTTCTTTGTTGCTTTGTTTGCAGATCGGAAGAGCGGTTTCAG     |
| chr3  | 89457292  | 89457331  | EPHA3_8141 | + | GTGACCTATGCACCAGACGTAAACTTGGCTTTTTGTTTTGCTTCCCGTTTAGCTTTAGAGATCGGAAGAGCGGTTTCAG       |
| chr3  | 89462427  | 89462466  | EPHA3_8142 | + | GTGACCTATGCACCAGACGTTGACCCTACTGCCAACTTAGTACTGTATGTGAATCACGATAGATCGGAAGAGCGGTTTCAG     |
| chr3  | 89468551  | 89468590  | EPHA3_8143 | + | GTGACCTATGCACCAGACGTTAGTCATAAGACCTGTGTTCCGATGTTGAGCAAAGTTAGATCGGAAGAGCGGTTTCAG        |
| chr3  | 89478328  | 89478367  | EPHA3_8144 | + | GTGACCTATGCACCAGACGTGACCATACATATATGAATAAATGCTGAAAACAAGATCGGAAGAGCGGTTTCAG             |
| chr3  | 89480520  | 89480559  | EPHA3_8145 | + | GTGACCTATGCACCAGACGTTAGATTTTTCTCTTTTTTATCATTGTTTTCCATCTTGTATAGATCGGAAGAGCGGTTTCAG     |
| chr3  | 89498535  | 89498574  | EPHA3_8146 | + | GTGACCTATGCACCAGACGTGTGGTCTATGAGTTATGAGTTCAGATGAAAAGATCAAGCTAGATCGGAAGAGCGGTTTCAG     |
| chr3  | 89499531  | 89499570  | EPHA3_8147 | + | GTGACCTATGCACCAGACGTCAATTTGTTATCTGGCATTCACTCTGAAATTTGTGTTTGCAGATCGGAAGAGCGGTTTCAG     |
| chr3  | 89521780  | 89521819  | EPHA3_8148 | + | GTGACCTATGCACCAGACGTAATAAGAAATGAAAGGATGAAAGGATCTTTTGAACCTTCAGATCGGAAGAGCGGTTTCAG      |
| chr3  | 89528663  | 89528702  | EPHA3_8149 | + | GTGACCTATGCACCAGACGTGGAAGTGTCTTGGACGGAAGTGGTGGCTGTGGAAGCGTAGATCGGAAGAGCGGTTTCAG       |
| chr3  | 89259350  | 89259389  | EPHA3_8150 | + | GTGACCTATGCACCAGACGTGACACTGAGATAGAGAATGAGGCTCTGTCAACAAGAAGCGGAGATCGGAAGAGCGGTTTCAG    |
| chr7  | 100318627 | 100318666 | EPO_8151   | + | GTGACCTATGCACCAGACGTGCGGGCTGGGCGCTCCCGCCCGCCGGGTCCTGTTTGGAGATCGGAAGAGCGGTTTCAG        |
| chr7  | 100319337 | 100319376 | EPO_8152   | + | GTGACCTATGCACCAGACGTTTTCCCAGCACATTCACAGAACTCACGCTCAGGGCTTCAAGATCGGAAGAGCGGTTTCAG      |
| chr7  | 100319682 | 100319721 | EPO_8153   | + | GTGACCTATGCACCAGACGTTTTTTTTTTTTTTTCTTTCTTTTGGAGAATCTCATTTCGAGATCGGAAGAGCGGTTTCAG      |
| chr7  | 100320477 | 100320516 | EPO_8154   | + | GTGACCTATGCACCAGACGTGGCGACACTCTGCTTGCCTTTCTGTAAGAAGGGGAGAAAAGATCGGAAGAGCGGTTTCAG      |
| chr7  | 100320767 | 100320806 | EPO_8155   | + | GTGACCTATGCACCAGACGTGCCACTGGGCATATCCACCACCTCCCTCACCAACATGCTAGATCGGAAGAGCGGTTTCAG      |
| chr2  | 212248796 | 212248835 | ERBB4_8156 | + | GTGACCTATGCACCAGACGTAAAAAATATCAGCTAACCTCTAGTTTCTGAAAATATTAAGATCGGAAGAGCGGTTTCAG       |
| chr2  | 212251886 | 212251925 | ERBB4_8157 | + | GTGACCTATGCACCAGACGTGAGAAAATATGTGGAGAGAAGGCGTTGTTAGAATAGTTAGATCGGAAGAGCGGTTTCAG       |
| chr2  | 212252728 | 212252767 | ERBB4_8158 | + | GTGACCTATGCACCAGACGTAGAAAAATGGAATGATGGATATAATAAGAGGCAATATGAAAAGATCGGAAGAGCGGTTTCAG    |
| chr2  | 212285347 | 212285386 | ERBB4_8159 | + | GTGACCTATGCACCAGACGTGATTGCCATCAGACAAAATATGATTCTTTCTTATCTTAAGATCGGAAGAGCGGTTTCAG       |
| chr2  | 212286840 | 212286879 | ERBB4_8160 | + | GTGACCTATGCACCAGACGTACACAGTAAATGTCACATATTCGTAAGTAAAGGAGAGATCGGAAGAGCGGTTTCAG          |
| chr2  | 212289037 | 212289076 | ERBB4_8161 | + | GTGACCTATGCACCAGACGTGAAAAAATCTTACTTCAAGCATATTAACAACATATGTTGAAGATCGGAAGAGCGGTTTCAG     |
| chr2  | 212293219 | 212293258 | ERBB4_8162 | + | GTGACCTATGCACCAGACGTGTAAGAAGTAAAGTTTTAAATTAACATTAATAATCATTAGATCGGAAGAGCGGTTTCAG       |
| chr2  | 212295836 | 212295875 | ERBB4_8163 | + | GTGACCTATGCACCAGACGTTCAAGTTCCCTTAATGATATTCAGTTAATGCCAGGTTTTTCAGATCGGAAGAGCGGTTTCAG    |
| chr2  | 212426824 | 212426863 | ERBB4_8164 | + | GTGACCTATGCACCAGACGTAAAAATGCAATACCATTGATTTCAACTCAAATTTTTCTTAGATAGATCGGAAGAGCGGTTTCAG  |
| chr2  | 212484011 | 212484050 | ERBB4_8165 | + | GTGACCTATGCACCAGACGTAAAAATTTACATTAATATGACATCTCAACTTATTAAGTTAGATCGGAAGAGCGGTTTCAG      |
| chr2  | 212495330 | 212495369 | ERBB4_8166 | + | GTGACCTATGCACCAGACGTGAATGAGAAAAAATAAATAAAGATGAAAGATGAGAGAGAAAAGATCGGAAGAGCGGTTTCAG    |
| chr2  | 212522564 | 212522603 | ERBB4_8167 | + | GTGACCTATGCACCAGACGTTTACAGAACAGAAAACATCATTCTCCATCCACAGTGACATAGATCGGAAGAGCGGTTTCAG     |
| chr2  | 212530213 | 212530252 | ERBB4_8168 | + | GTGACCTATGCACCAGACGTAAAAAGAAAAAAGAAAAAGAAAAAGTGGTGTCTTTTCAGATCGGAAGAGCGGTTTCAG        |
| chr2  | 212537993 | 212538032 | ERBB4_8169 | + | GTGACCTATGCACCAGACGTATCAGCCACATGAGGAGGTGTAAGCAAAACAAGCGTCAACTAGATCGGAAGAGCGGTTTCAG    |
| chr2  | 212543920 | 212543959 | ERBB4_8170 | + | GTGACCTATGCACCAGACGTCCAAATCAAGGGGAAATAAACAGAGGATTGTGTCAAAAAGATCGGAAGAGCGGTTTCAG       |
| chr2  | 212566902 | 212566941 | ERBB4_8171 | + | GTGACCTATGCACCAGACGTGGAAGTGAAGAAACGGAACCATGAAACGCTCCGAGTAAGATCGGAAGAGCGGTTTCAG        |
| chr2  | 212568930 | 212568969 | ERBB4_8172 | + | GTGACCTATGCACCAGACGTAGAGTAGAAAAATAAATCAGAAATATCATTGCTCTAGATAGATCGGAAGAGCGGTTTCAG      |
| chr2  | 212570127 | 212570166 | ERBB4_8173 | + | GTGACCTATGCACCAGACGTAAAGAAGAGATGTAGCCAAATTTAAATTTTACTAAAGGATTAGATCGGAAGAGCGGTTTCAG    |
| chr2  | 212576912 | 212576951 | ERBB4_8174 | + | GTGACCTATGCACCAGACGTAAAGACTCAGAGTTAGGGGATTGAGAACTTATTTTTGGCCAGATCGGAAGAGCGGTTTCAG     |
| chr2  | 212578384 | 212578423 | ERBB4_8175 | + | GTGACCTATGCACCAGACGTAAAAAAGGGTAAATAAGCATTAATGTTAACATTTCAGATCGGAAGAGCGGTTTCAG          |
| chr2  | 212587270 | 212587309 | ERBB4_8176 | + | GTGACCTATGCACCAGACGTGCAAAATATTACTTTTCAATTAACAATAAATCATAATACTTAGATCGGAAGAGCGGTTTCAG    |
| chr2  | 212589930 | 212589969 | ERBB4_8177 | + | GTGACCTATGCACCAGACGTGAGAGTAGGACCATGATGAAATGCTGCCACCAGGAAAGATCGGAAGAGCGGTTTCAG         |
| chr2  | 212615440 | 212615479 | ERBB4_8178 | + | GTGACCTATGCACCAGACGTGAAAAGGGAAAAAGGACATGACCTTATAATCTTCACTAGATCGGAAGAGCGGTTTCAG        |

|      |           |           |            |   |                                                                                     |
|------|-----------|-----------|------------|---|-------------------------------------------------------------------------------------|
| chr2 | 212652895 | 212652934 | ERBB4_8179 | + | GTGACCTATGCACCAGACGTAACAAATAACAAATTTTTTGTCAAACCTGCTTGTGATGAGATCGGAAGAGCGGTTTCAG     |
| chr2 | 212812352 | 212812391 | ERBB4_8180 | + | GTGACCTATGCACCAGACGTACAACAGTTGCCCTGTGTTATAAAAACGAATTTGCTACTCTAGATCGGAAGAGCGGTTTCAG  |
| chr2 | 212989639 | 212989678 | ERBB4_8181 | + | GTGACCTATGCACCAGACGTAAGAAGATACACGTGAAATTACATAACCTTTATATGATATAGATCGGAAGAGCGGTTTCAG   |
| chr2 | 213403265 | 213403304 | ERBB4_8182 | + | GTGACCTATGCACCAGACGTTCTCAGATCCCCTGCTGACAATTACATGTCCAATGGCATAGATCGGAAGAGCGGTTTCAG    |
| chr6 | 35420581  | 35420620  | FANCE_8183 | + | GTGACCTATGCACCAGACGTGCCCGCGGCCCTTAGCAGGTATGGGAGGCGGGGGCTGTAGATCGGAAGAGCGGTTTCAG     |
| chr6 | 35424141  | 35424180  | FANCE_8184 | + | GTGACCTATGCACCAGACGTAGGGAGACTGGGTTTAGAGTGATCTTTCCAGCAGTGGTGGCAGATCGGAAGAGCGGTTTCAG  |
| chr6 | 35425388  | 35425427  | FANCE_8185 | + | GTGACCTATGCACCAGACGTGCCACAGTCTACCATAGCCCTTTCTCCATCTTCTACCCAAGATCGGAAGAGCGGTTTCAG    |
| chr6 | 35425772  | 35425811  | FANCE_8186 | + | GTGACCTATGCACCAGACGTATGACTGCCTGGCTCTGAGGTTACATTCTCTGTCCCTTATAGATCGGAAGAGCGGTTTCAG   |
| chr6 | 35426228  | 35426267  | FANCE_8187 | + | GTGACCTATGCACCAGACGTTGGGAGGTAAGTCTCAGAGTGCCAAGGACAATGGGAAGAGCAAGATCGGAAGAGCGGTTTCAG |
| chr6 | 35427242  | 35427281  | FANCE_8188 | + | GTGACCTATGCACCAGACGTAAACCAGCCCCAGGCCAGTAGCTCTGCCCTCAGTGTCTCAGATCGGAAGAGCGGTTTCAG    |
| chr6 | 35427548  | 35427587  | FANCE_8189 | + | GTGACCTATGCACCAGACGTAGGCCTCCGTGCTGTCCCCACTGCCACTGTTCCCCCAGGAGATCGGAAGAGCGGTTTCAG    |
| chr6 | 35428406  | 35428445  | FANCE_8190 | + | GTGACCTATGCACCAGACGTTGCCCTGGGGAAGAGTGGACAAGAAGTGTGCAGTCTAGATCGGAAGAGCGGTTTCAG       |
| chr6 | 35430702  | 35430741  | FANCE_8191 | + | GTGACCTATGCACCAGACGTATAGGGCCTTGGGCTTGGCTCTGCTGGCAGGGCTGCCCTGAGATCGGAAGAGCGGTTTCAG   |
| chr6 | 35434133  | 35434172  | FANCE_8192 | + | GTGACCTATGCACCAGACGTAGGGACCACCTCTTGGTGTCCATCACCAGCTTCTGAAAGATCGGAAGAGCGGTTTCAG      |
| chr6 | 35423837  | 35423876  | FANCE_8193 | + | GTGACCTATGCACCAGACGTGAAGAGGAGAACAGGGACTCCCAGCAGCTGGGAAACGCAAGATCGGAAGAGCGGTTTCAG    |
| chr1 | 241661281 | 241661320 | FH_8194    | + | GTGACCTATGCACCAGACGTATAAAAAGACGACATATGGGTAGCAGTGATATTTGGTTAGATCGGAAGAGCGGTTTCAG     |
| chr1 | 241665881 | 241665920 | FH_8195    | + | GTGACCTATGCACCAGACGTACCACCAATGACAGAGTAAAGACTAAATTTATGCAAATAAAGATCGGAAGAGCGGTTTCAG   |
| chr1 | 241667556 | 241667595 | FH_8196    | + | GTGACCTATGCACCAGACGTGAAAACATGCTAGATGGGTGAACAAGTAAACTAAACATAGATCGGAAGAGCGGTTTCAG     |
| chr1 | 241669479 | 241669518 | FH_8197    | + | GTGACCTATGCACCAGACGTAAAGAAAATTAAGGTAAGAATAAGTAATTCCTAATAGCTTAAGATCGGAAGAGCGGTTTCAG  |
| chr1 | 241672096 | 241672135 | FH_8198    | + | GTGACCTATGCACCAGACGTTTTTTCAAAGAAATATAAAATGTTAAATCAGAGGCAACAAGATCGGAAGAGCGGTTTCAG    |
| chr1 | 241675454 | 241675493 | FH_8199    | + | GTGACCTATGCACCAGACGTAAATGTTAAAAATGATTTTAAAAAAGGAAATAATAATGCTAGATCGGAAGAGCGGTTTCAG   |
| chr1 | 241677024 | 241677063 | FH_8200    | + | GTGACCTATGCACCAGACGTTCCAGAAAAATATTTCAAATTTACAATTTTACTTAAGCATGAGATCGGAAGAGCGGTTTCAG  |
| chr1 | 241680627 | 241680666 | FH_8201    | + | GTGACCTATGCACCAGACGTGAATACAACTATTACAAGTTGAAAAGAAACCCAGGATCAGATCGGAAGAGCGGTTTCAG     |
| chr1 | 241683033 | 241683072 | FH_8202    | + | GTGACCTATGCACCAGACGTGAGCTTGGGTAGAATTTCTGGCGGCTGTGGCCACGCCTCAGATCGGAAGAGCGGTTTCAG    |
| chr5 | 180036064 | 180036103 | FLT4_8203  | + | GTGACCTATGCACCAGACGTAGGACAAGCCAGGCTGTGGGTCCCGCCTGAGGCCCTCCTGAGATCGGAAGAGCGGTTTCAG   |
| chr5 | 180037036 | 180037075 | FLT4_8204  | + | GTGACCTATGCACCAGACGTAAATCAGAAGGTGCTGAGGAACCGCTGCAGCAACCCTCCAGATCGGAAGAGCGGTTTCAG    |
| chr5 | 180038490 | 180038529 | FLT4_8205  | + | GTGACCTATGCACCAGACGTGAGGAGAGGCCAGCCAGGCCAGAAACCACAGCCACTGCCAGATCGGAAGAGCGGTTTCAG    |
| chr5 | 180039622 | 180039661 | FLT4_8206  | + | GTGACCTATGCACCAGACGTACGTGGGCTGCTGGACTGCATGCAACCCACCCCGTCCAAGATCGGAAGAGCGGTTTCAG     |
| chr5 | 180040121 | 180040160 | FLT4_8207  | + | GTGACCTATGCACCAGACGTGAAGGGAGTGGTGGGAGCAACGCCCTCTGCGGCTCAGAGATCGGAAGAGCGGTTTCAG      |
| chr5 | 180041190 | 180041229 | FLT4_8208  | + | GTGACCTATGCACCAGACGTAGAGGGAAGCTTGTCCCGTGGTGGATGGGGAGACGGAGGGAGATCGGAAGAGCGGTTTCAG   |
| chr5 | 180043500 | 180043539 | FLT4_8209  | + | GTGACCTATGCACCAGACGTGGGAGGCGGCAGGGGGCTGTCAAGTGCAGGCCCTGGGGTAGATCGGAAGAGCGGTTTCAG    |
| chr5 | 180044005 | 180044044 | FLT4_8210  | + | GTGACCTATGCACCAGACGTGAGCCAGGTGGGCTCAGGAGGCCCTCCTCCGCGGCTCCAGATCGGAAGAGCGGTTTCAG     |
| chr5 | 180045931 | 180045970 | FLT4_8211  | + | GTGACCTATGCACCAGACGTACGAAGCTGGCTCGAGGGCGCCAGCTGCTCCGCCGACAGATCGGAAGAGCGGTTTCAG      |
| chr5 | 180046120 | 180046159 | FLT4_8212  | + | GTGACCTATGCACCAGACGTACCGGGCGCGGCTCGGTTCCGAACCCGGGGCGGCTGAGATCGGAAGAGCGGTTTCAG       |
| chr5 | 180046377 | 180046416 | FLT4_8213  | + | GTGACCTATGCACCAGACGTACGGGCCCTCACACGGCCCGACCCCTGGCAGTCCCCGTAGATCGGAAGAGCGGTTTCAG     |
| chr5 | 180046780 | 180046819 | FLT4_8214  | + | GTGACCTATGCACCAGACGTAGGGGGCCAGTTGCAGGTGAGCTGTACGGGTGAGCGTGGAGATCGGAAGAGCGGTTTCAG    |
| chr5 | 180047319 | 180047358 | FLT4_8215  | + | GTGACCTATGCACCAGACGTGGGACAGGGAGGAGTGGGGCAGCTCACTGATTTGGCCATAAGATCGGAAGAGCGGTTTCAG   |
| chr5 | 180047726 | 180047765 | FLT4_8216  | + | GTGACCTATGCACCAGACGTAGAAGGGGGCGCGTGTGTGTGTGTGTGTAAGAGCGTAGATCGGAAGAGCGGTTTCAG       |
| chr5 | 180048018 | 180048057 | FLT4_8217  | + | GTGACCTATGCACCAGACGTTGGGGTGGAGGTGCGGGTCCACCTGGGTTTGGGATCGTTCGAGATCGGAAGAGCGGTTTCAG  |
| chr5 | 180048263 | 180048302 | FLT4_8218  | + | GTGACCTATGCACCAGACGTGGGTGAGAGGGAGCTAAGTGGAGCTGCACCTTAGCAGGAGATCGGAAGAGCGGTTTCAG     |
| chr5 | 180048915 | 180048954 | FLT4_8219  | + | GTGACCTATGCACCAGACGTAGGAAGAAGCCCTGTGGCAGCTGCCCTGGGAGTTTGTCCAGATCGGAAGAGCGGTTTCAG    |
| chr5 | 180049850 | 180049889 | FLT4_8220  | + | GTGACCTATGCACCAGACGTACAGGCACAAGGATCCATTTCTGCCAAGTTCTCCCAACAGATCGGAAGAGCGGTTTCAG     |
| chr5 | 180051072 | 180051111 | FLT4_8221  | + | GTGACCTATGCACCAGACGTGAGAAGAGGCAAGGGCAGGTCAGGGATACAGGCAGGAAGGAGATCGGAAGAGCGGTTTCAG   |
| chr5 | 180053042 | 180053081 | FLT4_8222  | + | GTGACCTATGCACCAGACGTACAGATGGCCGGTCACTGGCCTCCAATGCCAGGCCCCAGATCGGAAGAGCGGTTTCAG      |
| chr5 | 180053276 | 180053315 | FLT4_8223  | + | GTGACCTATGCACCAGACGTAAAGGAGGTCAAGGCCATACAGATCCCACCACAGCCCAAGATCGGAAGAGCGGTTTCAG     |
| chr5 | 180056010 | 180056049 | FLT4_8224  | + | GTGACCTATGCACCAGACGTGGAGAGCTGAGAGCTGTAATCCAGGACTGCCCTGTCGACAGATCGGAAGAGCGGTTTCAG    |
| chr5 | 180056438 | 180056477 | FLT4_8225  | + | GTGACCTATGCACCAGACGTCCAGGGAAGCCCCGCTCAGCAGCGGGCTCCTGCACAGCAGATCGGAAGAGCGGTTTCAG     |
| chr5 | 180056846 | 180056885 | FLT4_8226  | + | GTGACCTATGCACCAGACGTGCACACAGTACTCCCACGCCCTCACAGGACGACACCCACAGATCGGAAGAGCGGTTTCAG    |
| chr5 | 180057116 | 180057155 | FLT4_8227  | + | GTGACCTATGCACCAGACGTAAAGGCCACCATATTGCCAGCTGCCCTTGTCTCTGGCCAGATCGGAAGAGCGGTTTCAG     |
| chr5 | 180057348 | 180057387 | FLT4_8228  | + | GTGACCTATGCACCAGACGTGGAGCAAGCTGTTGGGGAAGGGACGTGGCGGCCAGGCTGGAGATCGGAAGAGCGGTTTCAG   |
| chr5 | 180057810 | 180057849 | FLT4_8229  | + | GTGACCTATGCACCAGACGTACAGGAGTGGTCAAGTGGGCCACGGCCATGGGGAAGATCGGAAGAGCGGTTTCAG         |
| chr5 | 180058789 | 180058828 | FLT4_8230  | + | GTGACCTATGCACCAGACGTAGCAGAGGTCAGGCTGGCTGGCTGTGACTTGGCACGAGATCGGAAGAGCGGTTTCAG       |
| chr5 | 180076556 | 180076595 | FLT4_8231  | + | GTGACCTATGCACCAGACGTTGCGCGTGGGTCCGACCCGAGCGGCCGCGGCTCGGGGCTGAGATCGGAAGAGCGGTTTCAG   |
| chr2 | 227663465 | 227663504 | IRS1_8232  | + | GTGACCTATGCACCAGACGTCCACCACCAACGCTGAGCAGAGGGAGGCTCCGAAAAACAAAGATCGGAAGAGCGGTTTCAG   |
| chr2 | 227660202 | 227660241 | IRS1_8233  | + | GTGACCTATGCACCAGACGTCACTCTGGTTGCGGTTAGGACTGAGGTTACCCGGGTGAAAGATCGGAAGAGCGGTTTCAG    |
| chr2 | 227660668 | 227660707 | IRS1_8234  | + | GTGACCTATGCACCAGACGTTGGCTGGACTGGGATGGACACCTGACAGAGGTGAGCTGAGATCGGAAGAGCGGTTTCAG     |
| chr2 | 227661134 | 227661173 | IRS1_8235  | + | GTGACCTATGCACCAGACGTGTGGTGTAAAGATCTTGGCAATGAGTAGTAGGAGGAAGATCGGAAGAGCGGTTTCAG       |
| chr2 | 227661600 | 227661639 | IRS1_8236  | + | GTGACCTATGCACCAGACGTCCCCGTTGGGACATGGGCATGTAGCCATCATCCGTGTGGAGAGATCGGAAGAGCGGTTTCAG  |

|       |           |           |            |   |                                                                                      |
|-------|-----------|-----------|------------|---|--------------------------------------------------------------------------------------|
| chr2  | 227662066 | 227662105 | IRS1_8237  | + | GTGACCTATGCACCAGACGTGCTTAGCTCCTCCTCACCGCGGGCTGGTGGGGTGTGGCCAGATCGGAAGAGCGGTTTCAG     |
| chr2  | 227662532 | 227662571 | IRS1_8238  | + | GTGACCTATGCACCAGACGTATGCTCTCAGTGCCTGATCGCGGGTTCAGCCCCACCTGGCAGATCGGAAGAGCGGTTTCAG    |
| chr2  | 227662998 | 227663037 | IRS1_8239  | + | GTGACCTATGCACCAGACGTACCCGTAGCTCAAGTCTCCCCAGCCTCACCAAGGCCGGAAGATCGGAAGAGCGGTTTCAG     |
| chr22 | 22123620  | 22123659  | MAPK1_8240 | + | GTGACCTATGCACCAGACGTAAACAAAACATTTAACAGTCAAAGTTGTTATGGGTAAGGCAGATCGGAAGAGCGGTTTCAG    |
| chr22 | 22127282  | 22127321  | MAPK1_8241 | + | GTGACCTATGCACCAGACGTAAAGGTTTTGCAGTAGTGAGAGCAGAAGTAGTCACAGAAAAGATCGGAAGAGCGGTTTCAG    |
| chr22 | 22142688  | 22142727  | MAPK1_8242 | + | GTGACCTATGCACCAGACGTAAAAATTAGCTATTAGTTATCAGGACCAAGGTAATGACAGATCGGAAGAGCGGTTTCAG      |
| chr22 | 22143108  | 22143147  | MAPK1_8243 | + | GTGACCTATGCACCAGACGTAAAAAGAGAGAAAAGACTGAAATGGTATCTGGTGTACAGAAAGATCGGAAGAGCGGTTTCAG   |
| chr22 | 22153428  | 22153467  | MAPK1_8244 | + | GTGACCTATGCACCAGACGTAAAAAACAAGGATAACTTCTTGAATACTTAACCTTTCATAGATCGGAAGAGCGGTTTCAG     |
| chr22 | 22160339  | 22160378  | MAPK1_8245 | + | GTGACCTATGCACCAGACGTAGGTTAAGGTAACAACCAATTAGCTGGTCACATTTAGCAAGATCGGAAGAGCGGTTTCAG     |
| chr22 | 22162146  | 22162185  | MAPK1_8246 | + | GTGACCTATGCACCAGACGTAGAGAGAGAGATGGCATTAAAAACAGCCCTCAGAATATTTAGATCGGAAGAGCGGTTTCAG    |
| chr8  | 90947851  | 90947890  | NBN_8247   | + | GTGACCTATGCACCAGACGTAGAAATGGGGTTAAATGATATTTAGATAAGGGATGGTATTAGATCGGAAGAGCGGTTTCAG    |
| chr8  | 90949314  | 90949353  | NBN_8248   | + | GTGACCTATGCACCAGACGTAAACATAATTTCAAACATTTGCTCAGTGGTGAATATATAGATCGGAAGAGCGGTTTCAG      |
| chr8  | 90955605  | 90955644  | NBN_8249   | + | GTGACCTATGCACCAGACGTATAAAGTAGTACAGTAAATCATATTAACAACAATAAAGATCGGAAGAGCGGTTTCAG        |
| chr8  | 90958534  | 90958573  | NBN_8250   | + | GTGACCTATGCACCAGACGTGTTAAGATGGATAGGTAAGAAAGAGAAGAAATAACAAGAAGATCGGAAGAGCGGTTTCAG     |
| chr8  | 90960131  | 90960170  | NBN_8251   | + | GTGACCTATGCACCAGACGTAAAAATAAAAAACTGTTTCATAGAGTATAAAAATGGTATAGATCGGAAGAGCGGTTTCAG     |
| chr8  | 90965930  | 90965969  | NBN_8252   | + | GTGACCTATGCACCAGACGTAAAAAAGAAGAAAACAAAACAAGAAATGAACACAGCTAGATCGGAAGAGCGGTTTCAG       |
| chr8  | 90967794  | 90967833  | NBN_8253   | + | GTGACCTATGCACCAGACGTAGAAAGAAGTCAAAGTAAATAAATCAAGTTTACAGCACTAGATCGGAAGAGCGGTTTCAG     |
| chr8  | 90971093  | 90971132  | NBN_8254   | + | GTGACCTATGCACCAGACGTACAAAGTAGAAAGAAAGAACTACAACCTGCTAGATAGAAAGATCGGAAGAGCGGTTTCAG     |
| chr8  | 90976746  | 90976785  | NBN_8255   | + | GTGACCTATGCACCAGACGTAAAAATAGTTTAAAGTATGATAATATATAAAGTAGCAACTAGATCGGAAGAGCGGTTTCAG    |
| chr8  | 90982796  | 90982835  | NBN_8256   | + | GTGACCTATGCACCAGACGTAAAGAAACATTTTTTAAAGTAAATGTAGTAAATTTTTTGAAGATCGGAAGAGCGGTTTCAG    |
| chr8  | 90983529  | 90983568  | NBN_8257   | + | GTGACCTATGCACCAGACGTAAATAAGTATATCTAATATATACTACTATGTTGCTAAGATCGGAAGAGCGGTTTCAG        |
| chr8  | 90990562  | 90990601  | NBN_8258   | + | GTGACCTATGCACCAGACGTGAAAAATGTGAATATATATATTTACATGCTAGCATTTTTAGATCGGAAGAGCGGTTTCAG     |
| chr8  | 90993132  | 90993171  | NBN_8259   | + | GTGACCTATGCACCAGACGTGAATAAGTTAAATAAGTCATAGTATCAGAGTTGCAGAGAAGATCGGAAGAGCGGTTTCAG     |
| chr8  | 90993762  | 90993801  | NBN_8260   | + | GTGACCTATGCACCAGACGTGAAATAAATTTAAAGTCTTTTTACCACCTAGTACATTACAGATCGGAAGAGCGGTTTCAG     |
| chr8  | 90996800  | 90996839  | NBN_8261   | + | GTGACCTATGCACCAGACGTCTCAGGGCTGGGCGCAGCTGCAACCCGCTAACCCGGGCAGATCGGAAGAGCGGTTTCAG      |
| chr20 | 8113408   | 8113447   | PLCB1_8262 | + | GTGACCTATGCACCAGACGTGGGCGGCCGAGTCGGGGCGCTGGCTCGGGCACCCGGCAGATCGGAAGAGCGGTTTCAG       |
| chr20 | 8131029   | 8131068   | PLCB1_8263 | + | GTGACCTATGCACCAGACGTAGGTATGCCTTTCTTACATTTTTTCAGTCGTTTACTACTTTAGATCGGAAGAGCGGTTTCAG   |
| chr20 | 8352108   | 8352147   | PLCB1_8264 | + | GTGACCTATGCACCAGACGTGAGTGTGTTGTGCATGCACCAGATGCTGCTGATTGTTTGGAGATCGGAAGAGCGGTTTCAG    |
| chr20 | 8609089   | 8609128   | PLCB1_8265 | + | GTGACCTATGCACCAGACGTGTAAGATTTGCTAAAGCTTATCATCATGATGCTGAATCCTTGAAGATCGGAAGAGCGGTTTCAG |
| chr20 | 8626839   | 8626878   | PLCB1_8266 | + | GTGACCTATGCACCAGACGTCTAATTTATTGCTAAGGGCTTGCTTCTTCTGAGTCAGTAGATCGGAAGAGCGGTTTCAG      |
| chr20 | 8628611   | 8628650   | PLCB1_8267 | + | GTGACCTATGCACCAGACGTTGAGCATTCTCATTATTTATTTTTCTCAAGATCAGATCGGAAGAGCGGTTTCAG           |
| chr20 | 8637942   | 8637981   | PLCB1_8268 | + | GTGACCTATGCACCAGACGTACATTTTAAAGCCATATCTTTTTCAGCTTGCATTGATTCTCAGATCGGAAGAGCGGTTTCAG   |
| chr20 | 8639362   | 8639401   | PLCB1_8269 | + | GTGACCTATGCACCAGACGTTCTTTCACACAAAGGGGAAGCTCTTGTCTGATTGGGGGAGATCGGAAGAGCGGTTTCAG      |
| chr20 | 8665736   | 8665775   | PLCB1_8270 | + | GTGACCTATGCACCAGACGTTCTAGTCTTTGTTACTTTAGCCAGTCTCACCAAAATTTCAAGATCGGAAGAGCGGTTTCAG    |
| chr20 | 8678441   | 8678480   | PLCB1_8271 | + | GTGACCTATGCACCAGACGTTGAATGTTACTAAGAGAGCAGCTGGAGACACCTGATCCAGATCGGAAGAGCGGTTTCAG      |
| chr20 | 8689410   | 8689449   | PLCB1_8272 | + | GTGACCTATGCACCAGACGTAAACACATTCAGGAATGAGTCTTTTTCCGAATAGGGCATAAGATCGGAAGAGCGGTTTCAG    |
| chr20 | 8697006   | 8697045   | PLCB1_8273 | + | GTGACCTATGCACCAGACGTCTGATGTTTGTCTTGAAGGAATGATGCATTATTGATGAAGATCGGAAGAGCGGTTTCAG      |
| chr20 | 8698506   | 8698545   | PLCB1_8274 | + | GTGACCTATGCACCAGACGTGGTGGGCTCTCCCCGTCATGTTTTGTGTTGGTTAAGAAATAGATCGGAAGAGCGGTTTCAG    |
| chr20 | 8703079   | 8703118   | PLCB1_8275 | + | GTGACCTATGCACCAGACGTAGGGCTTCTGGTCCCTAAGGCATTCACCACCCTGTACTCAGATCGGAAGAGCGGTTTCAG     |
| chr20 | 8705410   | 8705449   | PLCB1_8276 | + | GTGACCTATGCACCAGACGTCTGGAGAAAACCCCTCTTGACAGATATAATGATTATATAGATCGGAAGAGCGGTTTCAG      |
| chr20 | 8708051   | 8708090   | PLCB1_8277 | + | GTGACCTATGCACCAGACGTTTTGACGAATGACTGAGAATGACACACAGCTGAAGCTTGGATCGGAAGAGCGGTTTCAG      |
| chr20 | 8709832   | 8709871   | PLCB1_8278 | + | GTGACCTATGCACCAGACGTGCTTGTCCCATCTGCTATGAACTCACATTGCCAAGTGTAGATCGGAAGAGCGGTTTCAG      |
| chr20 | 8714050   | 8714089   | PLCB1_8279 | + | GTGACCTATGCACCAGACGTCCCATCACAAAATTTGTTCTTAAACAATAGTTGAATTTATAGATCGGAAGAGCGGTTTCAG    |
| chr20 | 8717850   | 8717889   | PLCB1_8280 | + | GTGACCTATGCACCAGACGTTGTTCTTGATATGAGTTAACTGCATTTTTTCAGGTGTTTAGATCGGAAGAGCGGTTTCAG     |
| chr20 | 8720018   | 8720057   | PLCB1_8281 | + | GTGACCTATGCACCAGACGTTGTGCTGAGAAACCTTTTATCAAAGTTGCAAAAGAAATCAAGATCGGAAGAGCGGTTTCAG    |
| chr20 | 8721106   | 8721145   | PLCB1_8282 | + | GTGACCTATGCACCAGACGTTAACTGAAATACCCTTTACTCAAAGGGGTTATTTCTGTCTAGATCGGAAGAGCGGTTTCAG    |
| chr20 | 8722231   | 8722270   | PLCB1_8283 | + | GTGACCTATGCACCAGACGTGTTTTAATTTTACATATAGCATTAAGCATGATCACACACAGATCGGAAGAGCGGTTTCAG     |
| chr20 | 8737836   | 8737875   | PLCB1_8284 | + | GTGACCTATGCACCAGACGTTGGAAGAGCTGGACAACATGAGCAAGATCCTCCAGTTCAAGATCGGAAGAGCGGTTTCAG     |
| chr20 | 8741118   | 8741157   | PLCB1_8285 | + | GTGACCTATGCACCAGACGTCCCTTTCCCCCATGGAATTAAGCAGCTCAGTGTACACAAGATCGGAAGAGCGGTTTCAG      |
| chr20 | 8746016   | 8746055   | PLCB1_8286 | + | GTGACCTATGCACCAGACGTTGAATATTTTAGTTGGTTTCATAGCATGAAGAGTTGTTAAGATCGGAAGAGCGGTTTCAG     |
| chr20 | 8755377   | 8755416   | PLCB1_8287 | + | GTGACCTATGCACCAGACGTGAACATGATTATGTTGTGCAACTGGAACCTCCCTTATAAGATCGGAAGAGCGGTTTCAG      |
| chr20 | 8769183   | 8769222   | PLCB1_8288 | + | GTGACCTATGCACCAGACGTTTCCCATTAACAATTTGACATGCTGATCTGAATTTATCAAAGATCGGAAGAGCGGTTTCAG    |
| chr20 | 8769380   | 8769419   | PLCB1_8289 | + | GTGACCTATGCACCAGACGTAGTGTCCCTCTCCCAAACAGTTCATCTGGGAATTTTTAGATCGGAAGAGCGGTTTCAG       |
| chr20 | 8770233   | 8770272   | PLCB1_8290 | + | GTGACCTATGCACCAGACGTTTCATCACGCTCTCTCTTTGCAAAACATGTGTGAACATTTAGATCGGAAGAGCGGTTTCAG    |
| chr20 | 8770919   | 8770958   | PLCB1_8291 | + | GTGACCTATGCACCAGACGTTGAAATTAATAAATGAACAATTTATTTGATTTCCATTTAGATCGGAAGAGCGGTTTCAG      |
| chr20 | 8782812   | 8782851   | PLCB1_8292 | + | GTGACCTATGCACCAGACGTTCCGGCCAGGTAGGACTGGATGGGAGGGGTCGCTTTTGGAGATCGGAAGAGCGGTTTCAG     |
| chr20 | 8862507   | 8862546   | PLCB1_8293 | + | GTGACCTATGCACCAGACGTACGGCTCAGAAATGTCATGGCCACTCCAGCTCAGGATCGGAAGAGCGGTTTCAG           |
| chr1  | 1982151   | 1982190   | PRKCZ_8294 | + | GTGACCTATGCACCAGACGTGAGAGGGCGGGAGCGCGGGTTCAGGCAGGGAGGGCGGAGATCGGAAGAGCGGTTTCAG       |

|       |           |           |              |   |                                                                                     |
|-------|-----------|-----------|--------------|---|-------------------------------------------------------------------------------------|
| chr1  | 1987012   | 1987051   | PRKCZ_8295   | + | GTGACCTATGCACCAGACGTTCCCATGTTGGCCAGAATCCTCAGCCTCAGGGGACTTCGCAGATCGGAAGAGCGGTTTCAG   |
| chr1  | 1988023   | 1988062   | PRKCZ_8296   | + | GTGACCTATGCACCAGACGTGGGTCTGTGGTGGGCAGCTCTGGGGGCTGTTCTGGCTGAGATCGGAAGAGCGGTTTCAG     |
| chr1  | 1991041   | 1991080   | PRKCZ_8297   | + | GTGACCTATGCACCAGACGTGGGTTTCTACGCCGGTCTCGCATGTTACGGGGTTGAACAGATCGGAAGAGCGGTTTCAG     |
| chr1  | 2066797   | 2066836   | PRKCZ_8298   | + | GTGACCTATGCACCAGACGTCCCTGGGACTAGTCCCTCAAGGGGCTTTTGTACTTTTAGATCGGAAGAGCGGTTTCAG      |
| chr1  | 2075791   | 2075830   | PRKCZ_8299   | + | GTGACCTATGCACCAGACGTGGGCTGGGGAGGCCCGGGGGGCACGGGCGGGGTCGGGGCGAGATCGGAAGAGCGGTTTCAG   |
| chr1  | 2077558   | 2077597   | PRKCZ_8300   | + | GTGACCTATGCACCAGACGTCTTTCTCCGGCCGGGTAGAGCTCGGCATCACCTACCCAGATCGGAAGAGCGGTTTCAG      |
| chr1  | 2080374   | 2080413   | PRKCZ_8301   | + | GTGACCTATGCACCAGACGTGGAGCAGCTCGCTGCCATTTCCAGATCCTCTGGAAAGTCAGATCGGAAGAGCGGTTTCAG    |
| chr1  | 2082428   | 2082467   | PRKCZ_8302   | + | GTGACCTATGCACCAGACGTCTTCTCATGGGGCCCGGGGGCCCGGAACGCGCTGCCCTGAGATCGGAAGAGCGGTTTCAG    |
| chr1  | 2087542   | 2087581   | PRKCZ_8303   | + | GTGACCTATGCACCAGACGTGAAGGGTATTTCTGATATTCTGCAGATTTAGATGTGAACAGATCGGAAGAGCGGTTTCAG    |
| chr1  | 2103640   | 2103679   | PRKCZ_8304   | + | GTGACCTATGCACCAGACGTGGACCACCCTCCCTGACCATCCCGCATGTGCGTCTCGGGAGATCGGAAGAGCGGTTTCAG    |
| chr1  | 2103838   | 2103877   | PRKCZ_8305   | + | GTGACCTATGCACCAGACGTCTGCCCTGGCCCTCTCGGAGCACACAGGGCCAGAGATGGAGATCGGAAGAGCGGTTTCAG    |
| chr1  | 2105466   | 2105505   | PRKCZ_8306   | + | GTGACCTATGCACCAGACGTGCGTGTGCTTCCCTCACCCCTCACCTGCAGACTGTCTCCAGATCGGAAGAGCGGTTTCAG    |
| chr1  | 2106283   | 2106322   | PRKCZ_8307   | + | GTGACCTATGCACCAGACGTGGCCATGCTGACAAATCTGTTTTGTGGCTCGGTGTTGGAGATCGGAAGAGCGGTTTCAG     |
| chr1  | 2106763   | 2106802   | PRKCZ_8308   | + | GTGACCTATGCACCAGACGTACAAAGCCTATTTGCACCCCATCCCATCCCAACCCCAAAGATCGGAAGAGCGGTTTCAG     |
| chr1  | 2116148   | 2116187   | PRKCZ_8309   | + | GTGACCTATGCACCAGACGTCTGGGTGCGGGTCCCTGGAGCACCCCTCGGGCAGCCCATAGATCGGAAGAGCGGTTTCAG    |
| chr1  | 2116459   | 2116498   | PRKCZ_8310   | + | GTGACCTATGCACCAGACGTGCTCTGTCTGCTGGACAGCGGTGATTGACCCTTTAACTGTAAGATCGGAAGAGCGGTTTCAG  |
| chr22 | 24134065  | 24134104  | SMARCB1_8311 | + | GTGACCTATGCACCAGACGTAAACGCTAAACATAAGGGTGCCTTTCACGAGGGTTTTGTAAGATCGGAAGAGCGGTTTCAG   |
| chr22 | 24134092  | 24134131  | SMARCB1_8312 | + | GTGACCTATGCACCAGACGTACGAGGGTTTTGTAACCTGTTTTCAAACCACTCGCTTAGATGATCGGAAGAGCGGTTTCAG   |
| chr22 | 24135886  | 24135925  | SMARCB1_8313 | + | GTGACCTATGCACCAGACGTCTCGCCAGGGCATCTCTGGGGACACCTGTGGGGTCTTTTAGATCGGAAGAGCGGTTTCAG    |
| chr22 | 24143279  | 24143318  | SMARCB1_8314 | + | GTGACCTATGCACCAGACGTATCGCTGCACCTCACCCCTCCGTGCTGATTCGCTTAGTTTCAGATCGGAAGAGCGGTTTCAG  |
| chr22 | 24145620  | 24145659  | SMARCB1_8315 | + | GTGACCTATGCACCAGACGTGTGCGGCTTGGCTGGGCCGTCGCCCAACCCCTGTGTGTTAAGATCGGAAGAGCGGTTTCAG   |
| chr22 | 24159134  | 24159173  | SMARCB1_8316 | + | GTGACCTATGCACCAGACGTCTCACCCAGCCTGGAGCCTTCCCTGGCCCTCAGGGTGGGAGATCGGAAGAGCGGTTTCAG    |
| chr22 | 24167613  | 24167652  | SMARCB1_8317 | + | GTGACCTATGCACCAGACGTGACTGAGTCTCCCTCCCTCATCTCCCTGCAAACTGTTAGATCGGAAGAGCGGTTTCAG      |
| chr22 | 24175901  | 24175940  | SMARCB1_8318 | + | GTGACCTATGCACCAGACGTCCCTGTGGTCTGGGCTCTGCCACAGGCACCTGGCTTTCAGATCGGAAGAGCGGTTTCAG     |
| chr22 | 24176378  | 24176417  | SMARCB1_8319 | + | GTGACCTATGCACCAGACGTAGCACACGGCTCCACGAGCATCTCAGAAGATTGGGCCGAGATCGGAAGAGCGGTTTCAG     |
| chr15 | 57213307  | 57213346  | TCF12_8320   | + | GTGACCTATGCACCAGACGTGCTTAACTAAAGACTCATATTTGGTGGTGTGATACATAGATCGGAAGAGCGGTTTCAG      |
| chr15 | 57356032  | 57356071  | TCF12_8321   | + | GTGACCTATGCACCAGACGTGATCAACCTTGATTAAGCTGTAATTTGGCAGACTACGAGATCGGAAGAGCGGTTTCAG      |
| chr15 | 57384100  | 57384139  | TCF12_8322   | + | GTGACCTATGCACCAGACGTAATTTCTCTGCAAGTAGTCTTCTCAAAGCTTCTTTGGTCAGAGATCGGAAGAGCGGTTTCAG  |
| chr15 | 57458675  | 57458714  | TCF12_8323   | + | GTGACCTATGCACCAGACGTGATTAATAAAAGCAATGAGATGGTTTTAAACACATAAAAGATCGGAAGAGCGGTTTCAG     |
| chr15 | 57484502  | 57484541  | TCF12_8324   | + | GTGACCTATGCACCAGACGTACACAACAAATCCCATCCCATATGTTGTTGTTGTTTGTAGATCGGAAGAGCGGTTTCAG     |
| chr15 | 57490034  | 57490073  | TCF12_8325   | + | GTGACCTATGCACCAGACGTATCTTTTTAACTTGATGGTAAACAACTGATTTCAAGTAGATCGGAAGAGCGGTTTCAG      |
| chr15 | 57511799  | 57511838  | TCF12_8326   | + | GTGACCTATGCACCAGACGTTTTCTTTGATAGCTTCTAACTACTTGTTTAAAGGAAAGCAGATCGGAAGAGCGGTTTCAG    |
| chr15 | 57523466  | 57523505  | TCF12_8327   | + | GTGACCTATGCACCAGACGTCCAAACAATTGCCAAATACTACTCGAGCTCATCTGTATATCAGATCGGAAGAGCGGTTTCAG  |
| chr15 | 57524639  | 57524678  | TCF12_8328   | + | GTGACCTATGCACCAGACGTACACGTGACTAGGGTACAGCAACACTTTGTCTCACTTGTAGATCGGAAGAGCGGTTTCAG    |
| chr15 | 57525065  | 57525104  | TCF12_8329   | + | GTGACCTATGCACCAGACGTGAGTGGCAAAAATCTCCATAAAGTTTTGTGGACTTTTCAGTAGATCGGAAGAGCGGTTTCAG  |
| chr15 | 57526316  | 57526355  | TCF12_8330   | + | GTGACCTATGCACCAGACGTATTTTACACATTCTACTGAATGAATTTTACTACTACTGAATAGATCGGAAGAGCGGTTTCAG  |
| chr15 | 57535759  | 57535798  | TCF12_8331   | + | GTGACCTATGCACCAGACGTGTTTTATCTACTTCTAACTGGTGGGACTACTTGGAAATATAGATCGGAAGAGCGGTTTCAG   |
| chr15 | 57543632  | 57543671  | TCF12_8332   | + | GTGACCTATGCACCAGACGTCTTATACATCAGTTTTATCTGATAGCTTAGAGTTTTGTTTGTAGATCGGAAGAGCGGTTTCAG |
| chr15 | 57544701  | 57544740  | TCF12_8333   | + | GTGACCTATGCACCAGACGTTTTTAGATGGTGCCTTTTTGTGTTTCAATTAATATACTAGATCGGAAGAGCGGTTTCAG     |
| chr15 | 57545677  | 57545716  | TCF12_8334   | + | GTGACCTATGCACCAGACGTGCTCATCTTTTTGTAGTAAACCTAAAGATTTCTGCTAGATCGGAAGAGCGGTTTCAG       |
| chr15 | 57554417  | 57554456  | TCF12_8335   | + | GTGACCTATGCACCAGACGTGTTGTTTTTCAGAAATACTCAGACAGAGATATCATTTGAGATCGGAAGAGCGGTTTCAG     |
| chr15 | 57555483  | 57555522  | TCF12_8336   | + | GTGACCTATGCACCAGACGTGCATCCAGGTTTTAAATTTTATTCATTTCCATAGGTAAAGATCGGAAGAGCGGTTTCAG     |
| chr15 | 57565471  | 57565510  | TCF12_8337   | + | GTGACCTATGCACCAGACGTTACGCCGAGATGTATACTGTTCTGCTTCAGATGGGCAAGATCGGAAGAGCGGTTTCAG      |
| chr15 | 57574796  | 57574835  | TCF12_8338   | + | GTGACCTATGCACCAGACGTGGTAAGTACGGGTTTTGAAAAGAAACAGCAAGGAAATAACCAGATCGGAAGAGCGGTTTCAG  |
| chr1  | 186283169 | 186283208 | TPR_8339     | + | GTGACCTATGCACCAGACGTAAAGAAATCAAATGAAATATCTTTTAAAGAAATCAAAGATCGGAAGAGCGGTTTCAG       |
| chr1  | 186283867 | 186283906 | TPR_8340     | + | GTGACCTATGCACCAGACGTGCTAATAAGATAAAGAAAAGCAAGTGAATAAATGAGAAAGCAGATCGGAAGAGCGGTTTCAG  |
| chr1  | 186286743 | 186286782 | TPR_8341     | + | GTGACCTATGCACCAGACGTGAAAAATGAGAAAAACAAAACCTGATCCTACAGTCAATCAAGATCGGAAGAGCGGTTTCAG   |
| chr1  | 186287746 | 186287785 | TPR_8342     | + | GTGACCTATGCACCAGACGTACAACACAAGAAAAAGAACTTTAAACTTTGTGGTTTATCAGATCGGAAGAGCGGTTTCAG    |
| chr1  | 186287971 | 186288010 | TPR_8343     | + | GTGACCTATGCACCAGACGTTTCTGAATATTAATGAATGACTGAAAAAACATAAAATTAAGATCGGAAGAGCGGTTTCAG    |
| chr1  | 186289561 | 186289600 | TPR_8344     | + | GTGACCTATGCACCAGACGTAAAAACTAATTTAAGATGAAATTTAAAGTTAACCTATTTAAGATCGGAAGAGCGGTTTCAG   |
| chr1  | 186291555 | 186291594 | TPR_8345     | + | GTGACCTATGCACCAGACGTGAAAAAGATTAACAAACAAACACACATATGACTAGATCGGAAGAGCGGTTTCAG          |
| chr1  | 186291729 | 186291768 | TPR_8346     | + | GTGACCTATGCACCAGACGTAGATAAAGCAATTTGCTTTAAGAAATGAGGCAATGAGATCGGAAGAGCGGTTTCAG        |
| chr1  | 186293013 | 186293052 | TPR_8347     | + | GTGACCTATGCACCAGACGTAGAGAAATTTACTTTTTGAAGTCTAAATTTACCACAAAAAAGATCGGAAGAGCGGTTTCAG   |
| chr1  | 186295378 | 186295417 | TPR_8348     | + | GTGACCTATGCACCAGACGTGTTCCCCAGGCATAAATAAAAGTTTGAATATGGCCACAAGATCGGAAGAGCGGTTTCAG     |
| chr1  | 186296803 | 186296842 | TPR_8349     | + | GTGACCTATGCACCAGACGTAAAAAGTTAAAAAGAAATTAAGAGCCCTATAACATACCAGATCGGAAGAGCGGTTTCAG     |
| chr1  | 186300724 | 186300763 | TPR_8350     | + | GTGACCTATGCACCAGACGTATACATAATATTAACCATATCAGTGTAGTAGATGAAGAGATCGGAAGAGCGGTTTCAG      |
| chr1  | 186301486 | 186301525 | TPR_8351     | + | GTGACCTATGCACCAGACGTATATAAATCTGAAATTAAGCCTAGATAAATCAATTAAGATCGGAAGAGCGGTTTCAG       |
| chr1  | 186302537 | 186302576 | TPR_8352     | + | GTGACCTATGCACCAGACGTATATAATGCTGAATATAAGCCTTCTACTTTTATCAAAGCAGATCGGAAGAGCGGTTTCAG    |



|       |           |           |            |   |                                                                                          |
|-------|-----------|-----------|------------|---|------------------------------------------------------------------------------------------|
| chr1  | 186303676 | 186303715 | TPR_8353   | + | GTGACCTATGCACCAGACGTGAAAAATGGAAGAATAATTATAACAAATTATTATGCAAAAGATCGGAAGAGCGGTTTCAG         |
| chr1  | 186304272 | 186304311 | TPR_8354   | + | GTGACCTATGCACCAGACGTAAAGCTCTTGATTGTTGTTCCCTAGCCACAAAGAGTCCACTAGATCGGAAGAGCGGTTTCAG       |
| chr1  | 186304686 | 186304725 | TPR_8355   | + | GTGACCTATGCACCAGACGTAAACCAGGCGATTATATTAATATTATAATCAAACATTTAAAAGATCGGAAGAGCGGTTTCAG       |
| chr1  | 186305837 | 186305876 | TPR_8356   | + | GTGACCTATGCACCAGACGTAAACAAAGTATTCACCATGGAATTCATCATTTCATATAAGATCGGAAGAGCGGTTTCAG          |
| chr1  | 186307386 | 186307425 | TPR_8357   | + | GTGACCTATGCACCAGACGTGGAGGAAAGAAAGATTAATATATGAGACATTTTTTCAGATCGGAAGAGCGGTTTCAG            |
| chr1  | 186308915 | 186308954 | TPR_8358   | + | GTGACCTATGCACCAGACGTAAAAATGCGATCTTGATTTTTTAGGTTTTATGAAACAAAAGATCGGAAGAGCGGTTTCAG         |
| chr1  | 186310302 | 186310341 | TPR_8359   | + | GTGACCTATGCACCAGACGTGGCAATATTTAAACAACAATGTAAAAATTCATTTATTATAGATCGGAAGAGCGGTTTCAG         |
| chr1  | 186310532 | 186310571 | TPR_8360   | + | GTGACCTATGCACCAGACGTCAAATAAATATACATACCAACATCTACAATAAGTTGAAAGAGATCGGAAGAGCGGTTTCAG        |
| chr1  | 186312616 | 186312655 | TPR_8361   | + | GTGACCTATGCACCAGACGTACAGATATAAAATTTTTATGTGAATTTTAAAAAGCCAACAAGATCGGAAGAGCGGTTTCAG        |
| chr1  | 186313233 | 186313272 | TPR_8362   | + | GTGACCTATGCACCAGACGTAGAGTCTATCAGAATAACAGATTTTCCAATGCATATTTAAAAGATCGGAAGAGCGGTTTCAG       |
| chr1  | 186313721 | 186313760 | TPR_8363   | + | GTGACCTATGCACCAGACGTTTATTACCAATTGATACCAAAGATTAATAAAATCCATAAAAAGATCGGAAGAGCGGTTTCAG       |
| chr1  | 186314839 | 186314878 | TPR_8364   | + | GTGACCTATGCACCAGACGTAGAACAAGATTAACCAAAATTAATTGCAAACTTACTTGAGATCGGAAGAGCGGTTTCAG          |
| chr1  | 186315430 | 186315469 | TPR_8365   | + | GTGACCTATGCACCAGACGTTTACAAACAGTAGGATATAAAAATTACACACATTTAAAGTAGATCGGAAGAGCGGTTTCAG        |
| chr1  | 186316601 | 186316640 | TPR_8366   | + | GTGACCTATGCACCAGACGTTAACAGCTCTGTTAAAATTAACATTTTCAATAGTATTAGAAGATCGGAAGAGCGGTTTCAG        |
| chr1  | 186319531 | 186319570 | TPR_8367   | + | GTGACCTATGCACCAGACGTCATTAATCTTATAACATCTTTAGGTTCCCTAAGTAACTAAAGATCGGAAGAGCGGTTTCAG        |
| chr1  | 186320613 | 186320652 | TPR_8368   | + | GTGACCTATGCACCAGACGTGAAAAGATTTTTGGTTATGCTTAAGAAAAGGCAATACAAAGATCGGAAGAGCGGTTTCAG         |
| chr1  | 186321253 | 186321292 | TPR_8369   | + | GTGACCTATGCACCAGACGTGTAGAAATGAAATAAAAATGCTGAAAAACATGGTGCAAAAGATCGGAAGAGCGGTTTCAG         |
| chr1  | 186322993 | 186323032 | TPR_8370   | + | GTGACCTATGCACCAGACGTGAAAAGTAATTTACAAGTAACCTGAAATGATCTCTAGCTTAGATCGGAAGAGCGGTTTCAG        |
| chr1  | 186324701 | 186324740 | TPR_8371   | + | GTGACCTATGCACCAGACGTGAGATTATGAGAAGGTAACACTGTGTTCTCTAAAAACCTAAGATCGGAAGAGCGGTTTCAG        |
| chr1  | 186324911 | 186324950 | TPR_8372   | + | GTGACCTATGCACCAGACGTGAAAGACTATAAAAATGCTTTGTTGGCTTTCATAAATCAAGATCGGAAGAGCGGTTTCAG         |
| chr1  | 186325592 | 186325631 | TPR_8373   | + | GTGACCTATGCACCAGACGTAGTCGGCCTAATTCACAGGACTGAACTGAGAGTTAAGTGAAGATCGGAAGAGCGGTTTCAG        |
| chr1  | 186326766 | 186326805 | TPR_8374   | + | GTGACCTATGCACCAGACGTAGTTTTAATATGTTATAAAAATAGTATTAGTTACAATTTCTGAGATCGGAAGAGCGGTTTCAG      |
| chr1  | 186327793 | 186327832 | TPR_8375   | + | GTGACCTATGCACCAGACGTTAAATCAAGTGAATAATTTGTACTTCTCTAGGATTTAAGATCGGAAGAGCGGTTTCAG           |
| chr1  | 186329139 | 186329178 | TPR_8376   | + | GTGACCTATGCACCAGACGTACAAGGGTGTGTTTCAAATCTAACCCATAACACCGCAAAATAAGATCGGAAGAGCGGTTTCAG      |
| chr1  | 186329507 | 186329546 | TPR_8377   | + | GTGACCTATGCACCAGACGTAAATACACATCTAGTATAATTTGTAATAATTTCAAACCTAAAAGATCGGAAGAGCGGTTTCAG      |
| chr1  | 186330048 | 186330087 | TPR_8378   | + | GTGACCTATGCACCAGACGTATTTAAAGACCAAATATTCAAACATACAGTTAAAATTTTAGATCGGAAGAGCGGTTTCAG         |
| chr1  | 186330852 | 186330891 | TPR_8379   | + | GTGACCTATGCACCAGACGTATCTTAAAAAGTTACCTAACAGTCAACAATGCAACATTTAAGATCGGAAGAGCGGTTTCAG        |
| chr1  | 186331012 | 186331051 | TPR_8380   | + | GTGACCTATGCACCAGACGTTAGCCCAATTTATAGCAGTCTACTTTGAACTAAATTTAGAAAAGATCGGAAGAGCGGTTTCAG      |
| chr1  | 186331523 | 186331562 | TPR_8381   | + | GTGACCTATGCACCAGACGTAAAATAGACAGGGGGAAAGGATGTCATATTAACATGAAATAGATCGGAAGAGCGGTTTCAG        |
| chr1  | 186332144 | 186332183 | TPR_8382   | + | GTGACCTATGCACCAGACGTCCAAGAGAAATAACACGTAACGTTAAAGATGATATATGATTAGATCGGAAGAGCGGTTTCAG       |
| chr1  | 186332588 | 186332627 | TPR_8383   | + | GTGACCTATGCACCAGACGTGAAGAGAATAAAAAATAAATAACTAATTAACACTCAGGGGAGATCGGAAGAGCGGTTTCAG        |
| chr1  | 186337125 | 186337164 | TPR_8384   | + | GTGACCTATGCACCAGACGTGAAGAGTAAAGTAAGAAAATCAAGTAGAGCAATACAGGAGATCGGAAGAGCGGTTTCAG          |
| chr1  | 186340186 | 186340225 | TPR_8385   | + | GTGACCTATGCACCAGACGTGGAATTTTTATGAATACATACACATTTGCTTAAAACCTGCAAGATCGGAAGAGCGGTTTCAG       |
| chr1  | 186342606 | 186342645 | TPR_8386   | + | GTGACCTATGCACCAGACGTCAAGCAAAAAACAAAAACAATAACCAACACATGTACATAAGATCGGAAGAGCGGTTTCAG         |
| chr1  | 186344171 | 186344210 | TPR_8387   | + | GTGACCTATGCACCAGACGTCCAGGGCCACAGGGCCGCGCCGCTGCGAGCGCCTCTCCAGATCGGAAGAGCGGTTTCAG          |
| chr6  | 43739060  | 43739099  | VEGFA_8388 | + | GTGACCTATGCACCAGACGTGTGCCCTGCTGGCGCCGCGGGCCGCTGCGAGCGCCTCTCCAGATCGGAAGAGCGGTTTCAG        |
| chr6  | 43742140  | 43742179  | VEGFA_8389 | + | GTGACCTATGCACCAGACGTCTGGCTGTTGGATGGGGTTCCCTGTCTCTCAGGGGATGGAGATCGGAAGAGCGGTTTCAG         |
| chr6  | 43745413  | 43745452  | VEGFA_8390 | + | GTGACCTATGCACCAGACGTTTGGGAAGTGGGGCAAGGGGGGGATAGGGAGGGGGTAAACAGATCGGAAGAGCGGTTTCAG        |
| chr6  | 43746284  | 43746323  | VEGFA_8391 | + | GTGACCTATGCACCAGACGTAGTCACGGATTCTATTATCAGCAAGTGGCTGCAGGGTGCCTAGATCGGAAGAGCGGTTTCAG       |
| chr6  | 43746666  | 43746705  | VEGFA_8392 | + | GTGACCTATGCACCAGACGTCTGACTTTAGCACTTCTCCCTCCATGCCCCTGTTGCTTTAGATCGGAAGAGCGGTTTCAG         |
| chr6  | 43748533  | 43748572  | VEGFA_8393 | + | GTGACCTATGCACCAGACGTGGAGCGGTGAGCGCTGCTGCTTAATGCCCTGGAGCCTCCCTGGCCCCAGATCGGAAGAGCGGTTTCAG |
| chr6  | 43748551  | 43748590  | VEGFA_8394 | + | GTGACCTATGCACCAGACGTGCCCGCTGCTGCTAATGCCCTGGAGCCTCCCTGGCCCCAGATCGGAAGAGCGGTTTCAG          |
| chr6  | 43749800  | 43749839  | VEGFA_8395 | + | GTGACCTATGCACCAGACGTTTGAGTTAAACGAACGTAACCTTGCAGGTTGGTTCAGAGGAGATCGGAAGAGCGGTTTCAG        |
| chr6  | 43752294  | 43752333  | VEGFA_8396 | + | GTGACCTATGCACCAGACGTGGTGAGCCGGGCAGGAGGAAGGACCTCCCTCAGGGTTTATAGATCGGAAGAGCGGTTTCAG        |
| chr6  | 43752310  | 43752349  | VEGFA_8397 | + | GTGACCTATGCACCAGACGTAGGAAGGAGCCTCCCTCAGGGTTTCGGGAACCATCTAGATCGGAAGAGCGGTTTCAG            |
| chr6  | 43752376  | 43752415  | VEGFA_8398 | + | GTGACCTATGCACCAGACGTTCCGATACAGAAACACAGCTGCGCCGCCACCAACCATCACCAAGAGCGGTTTCAG              |
| chr6  | 43738757  | 43738796  | VEGFA_8399 | + | GTGACCTATGCACCAGACGTGGGGGGCCGAGTGGCGACTCGGCGCTCGGAAGCCGGGCTCAGATCGGAAGAGCGGTTTCAG        |
| chr17 | 48712353  | 48712392  | ABCC3_8400 | + | GTGACCTATGCACCAGACGTGGGCTCCGGGGTCACTGCGCGGGGGCCAGGGTTCGGCCGGCAGATCGGAAGAGCGGTTTCAG       |
| chr17 | 48733380  | 48733419  | ABCC3_8401 | + | GTGACCTATGCACCAGACGTGAGGATCTCCTACCAGATGGGGCTGGGCCCTGGGGATTCTAGATCGGAAGAGCGGTTTCAG        |
| chr17 | 48734199  | 48734238  | ABCC3_8402 | + | GTGACCTATGCACCAGACGTGGCCCTGGGAAAGTGGATGGGGGAGGTCTCCATTGGGTTGAGATCGGAAGAGCGGTTTCAG        |
| chr17 | 48734555  | 48734594  | ABCC3_8403 | + | GTGACCTATGCACCAGACGTGGAGAGGGGAACCTGCCAGTTTAGCCCTGATAGGAGGGAGATCGGAAGAGCGGTTTCAG          |
| chr17 | 48735579  | 48735618  | ABCC3_8404 | + | GTGACCTATGCACCAGACGTGAGGGGTGCGGGGGCTCCACAGTGGAGCTGAGCTCAGCCAGATCGGAAGAGCGGTTTCAG         |
| chr17 | 48735868  | 48735907  | ABCC3_8405 | + | GTGACCTATGCACCAGACGTTCTCCACCAGCCAGGCCAGAGGGAGGGGATGGAAGAGATCGGAAGAGCGGTTTCAG             |
| chr17 | 48736740  | 48736779  | ABCC3_8406 | + | GTGACCTATGCACCAGACGTCCCCTTGCCCCAACACCCAGCCCTTCGCTTACCCAGATAGATCGGAAGAGCGGTTTCAG          |
| chr17 | 48738486  | 48738525  | ABCC3_8407 | + | GTGACCTATGCACCAGACGTACTCCGGCTCACTATAGCCCTGCCCTGGGCAGCAGGGCTGABATCGGAAGAGCGGTTTCAG        |
| chr17 | 48741230  | 48741269  | ABCC3_8408 | + | GTGACCTATGCACCAGACGTGCAGGGCCAGGGGAAAGGCTGCCCTGGCCAGCTTGCAAAAGATCGGAAGAGCGGTTTCAG         |
| chr17 | 48741483  | 48741522  | ABCC3_8409 | + | GTGACCTATGCACCAGACGTACCCCTGACCTCTGCCCTCTGACATGCTGCAGAAAGATCGGAAGAGCGGTTTCAG              |
| chr17 | 48742617  | 48742656  | ABCC3_8410 | + | GTGACCTATGCACCAGACGTTACAGAGTGCATCTCCTGCTGAGCACCAGGGCTGAGATCGGAAGAGCGGTTTCAG              |

|       |           |           |             |   |                                                                                      |
|-------|-----------|-----------|-------------|---|--------------------------------------------------------------------------------------|
| chr17 | 48745129  | 48745168  | ABCC3_8411  | + | GTGACCTATGCACCAGACGTGCACAGGGCTGGGTCCCTGCCTCCAGGGCTCTGGGTGCCAGATCGGAAGAGCGGTTTCAG     |
| chr17 | 48745213  | 48745252  | ABCC3_8412  | + | GTGACCTATGCACCAGACGTACGCTGCTCAGGTGACCCCTGATCACCCCTCTGGGTGTACGTAGATCGGAAGAGCGGTTTCAG  |
| chr17 | 48745381  | 48745420  | ABCC3_8413  | + | GTGACCTATGCACCAGACGTGTAGGGCTGGGGGCTCTACTGGAGTTGGAACAGGTTGTTGAGATCGGAAGAGCGGTTTCAG    |
| chr17 | 48745889  | 48745928  | ABCC3_8414  | + | GTGACCTATGCACCAGACGTCCCCTACCTGGGCTGCCTGCCCCAGTCCCTTGTCCAGAAAAGATCGGAAGAGCGGTTTCAG    |
| chr17 | 48746291  | 48746330  | ABCC3_8415  | + | GTGACCTATGCACCAGACGTCTCCCACTCCCTCCACAGCTGCCACGGTGGGCTGGAAGTAGATCGGAAGAGCGGTTTCAG     |
| chr17 | 48746638  | 48746677  | ABCC3_8416  | + | GTGACCTATGCACCAGACGTGACGGGCTCCCTGGGCAGGGTGTGGGGCTCAGCCAGGCCTTAGATCGGAAGAGCGGTTTCAG   |
| chr17 | 48746900  | 48746939  | ABCC3_8417  | + | GTGACCTATGCACCAGACGTCTTCCATCTTAAGAGGCTAGGACATAGAGCTGCCACAGATCGGAAGAGCGGTTTCAG        |
| chr17 | 48750510  | 48750549  | ABCC3_8418  | + | GTGACCTATGCACCAGACGTCCAGAGGCTAAGGGGGCTAAGGTGAGATCTGAGGCCGAAAGATCGGAAGAGCGGTTTCAG     |
| chr17 | 48751030  | 48751069  | ABCC3_8419  | + | GTGACCTATGCACCAGACGTTCTGGGCCCTCTGATTCCCATGCCTCCAGCATTCCCCAGATCGGAAGAGCGGTTTCAG       |
| chr17 | 48752848  | 48752887  | ABCC3_8420  | + | GTGACCTATGCACCAGACGTGAGAGCTCCAGCCCTCCCGAGGCTGTATCAGGCCTCCAGATCGGAAGAGCGGTTTCAG       |
| chr17 | 48753147  | 48753186  | ABCC3_8421  | + | GTGACCTATGCACCAGACGTGGGGCAAGAGGGGCTGGAGGGGATGGACAGGCAGGCCCAAGATCGGAAGAGCGGTTTCAG     |
| chr17 | 48753462  | 48753501  | ABCC3_8422  | + | GTGACCTATGCACCAGACGTGGGGGTGCCAGAAAGGGCTCCAATATCCCTTCTCTGAGATCGGAAGAGCGGTTTCAG        |
| chr17 | 48753960  | 48753999  | ABCC3_8423  | + | GTGACCTATGCACCAGACGTGGCGGTGATCCAGTGTGGCGTGTGGTTATTGGGGCGGGGAGATCGGAAGAGCGGTTTCAG     |
| chr17 | 48755315  | 48755354  | ABCC3_8424  | + | GTGACCTATGCACCAGACGTGCCTCCCTCGCTCCCTGCTCCTCCAGGAATTCCAGCAGGAGATCGGAAGAGCGGTTTCAG     |
| chr17 | 48755591  | 48755630  | ABCC3_8425  | + | GTGACCTATGCACCAGACGTCTGGACCCAGGGCAGGGCCACCCTGGGACAGAAAACCAAGATCGGAAGAGCGGTTTCAG      |
| chr17 | 48757271  | 48757310  | ABCC3_8426  | + | GTGACCTATGCACCAGACGTGCATGAGCCCGGGACAGGGGGAATCTGAAGTAGCTGGGGAAGATCGGAAGAGCGGTTTCAG    |
| chr17 | 48761128  | 48761167  | ABCC3_8427  | + | GTGACCTATGCACCAGACGTGGTAGGGCGGGCTGCGTGTGTGTTTCATGCCTGCAGACATGAGATCGGAAGAGCGGTTTCAG   |
| chr17 | 48761479  | 48761518  | ABCC3_8428  | + | GTGACCTATGCACCAGACGTGGCATGGGCTGCCACTCACCAAGGCCTGGAGGCAGATCGGAAGAGCGGTTTCAG           |
| chr17 | 48762247  | 48762286  | ABCC3_8429  | + | GTGACCTATGCACCAGACGTGGAGTGCAGAGGTCAGAACTGCAACCCCTCCCTGGGAAACAGATCGGAAGAGCGGTTTCAG    |
| chr17 | 48765102  | 48765141  | ABCC3_8430  | + | GTGACCTATGCACCAGACGTGAAACCTGAGCAATGGGGAACCTGGTGGGGCCACTGGGGAGATCGGAAGAGCGGTTTCAG     |
| chr17 | 48768572  | 48768611  | ABCC3_8431  | + | GTGACCTATGCACCAGACGTTGAGATTTCTCCTGGCCCTTCTGGTTTTTATCAGGAAGAGATCGGAAGAGCGGTTTCAG      |
| chr11 | 35160928  | 35160967  | CD44_8432   | + | GTGACCTATGCACCAGACGTGCCGACGCTGGGCAGCAAGATGGTGCGGGGTGCTCAGCAGATCGGAAGAGCGGTTTCAG      |
| chr11 | 35198298  | 35198337  | CD44_8433   | + | GTGACCTATGCACCAGACGTAGCACCCGACCCTGGGAAAGCTGGCGGCCTGGGACCCAGAGATCGGAAGAGCGGTTTCAG     |
| chr11 | 35201965  | 35202004  | CD44_8434   | + | GTGACCTATGCACCAGACGTAGGGGGGTGCTGTTGGCTGAAAGGCTGTGGGACCTGGAGATCGGAAGAGCGGTTTCAG       |
| chr11 | 35208458  | 35208497  | CD44_8435   | + | GTGACCTATGCACCAGACGTCTCTAATCTTAATTAATTTTTCTATTTTGGGGAAGGGAGATCGGAAGAGCGGTTTCAG       |
| chr11 | 35211623  | 35211662  | CD44_8436   | + | GTGACCTATGCACCAGACGTTAAATCACTGTGCTTCCCAATGCAATTCCTGGCAAAATAGATCGGAAGAGCGGTTTCAG      |
| chr11 | 35218432  | 35218471  | CD44_8437   | + | GTGACCTATGCACCAGACGTATTATTATCTCATAGCGTATGTTTTCTTGACAGCCTTGAAGATCGGAAGAGCGGTTTCAG     |
| chr11 | 35219804  | 35219843  | CD44_8438   | + | GTGACCTATGCACCAGACGTTCAATTACAGTACAGCATTATGCAAGGCTTATTGATTAGATCGGAAGAGCGGTTTCAG       |
| chr11 | 35222753  | 35222792  | CD44_8439   | + | GTGACCTATGCACCAGACGTGCGATTTAATGAAAGATTTTTCCCCTCAAAGCCCAAGATCGGAAGAGCGGTTTCAG         |
| chr11 | 35223345  | 35223384  | CD44_8440   | + | GTGACCTATGCACCAGACGTGGCGATCGCGAGTCTGGTGTAGATGAATTAAGTAAAGACAGATCGGAAGAGCGGTTTCAG     |
| chr11 | 35226198  | 35226237  | CD44_8441   | + | GTGACCTATGCACCAGACGTGTTAACAAGTAAATTTGGATGGAACTTCTTTTTGGGTTAGATCGGAAGAGCGGTTTCAG      |
| chr11 | 35227801  | 35227840  | CD44_8442   | + | GTGACCTATGCACCAGACGTCTGAGATTTTATATATTATGTTTTTGAATCCACTGAGAGATCGGAAGAGCGGTTTCAG       |
| chr11 | 35229764  | 35229803  | CD44_8443   | + | GTGACCTATGCACCAGACGTGATGCTCAGCCACTTTATTGACTGTATTCTGCTTCATAGATCGGAAGAGCGGTTTCAG       |
| chr11 | 35231612  | 35231651  | CD44_8444   | + | GTGACCTATGCACCAGACGTTAAAACCTAGTTGGCTTCAGCTATTGATAAGAAATCAATCAAGATCGGAAGAGCGGTTTCAG   |
| chr11 | 35233007  | 35233046  | CD44_8445   | + | GTGACCTATGCACCAGACGTATTATTATCTAGTTTTGCTTCTCTATATAGAAAACCAATAGATCGGAAGAGCGGTTTCAG     |
| chr11 | 35236472  | 35236511  | CD44_8446   | + | GTGACCTATGCACCAGACGTAACCTGCTTTAGTCATTTACTGTTATAATCATTGAGCCTAAAGATCGGAAGAGCGGTTTCAG   |
| chr11 | 35240945  | 35240984  | CD44_8447   | + | GTGACCTATGCACCAGACGTAACCTTGGAGGCAGAAAACACACTGAAAGCAGCTTTCTCAAGATCGGAAGAGCGGTTTCAG    |
| chr11 | 35243290  | 35243329  | CD44_8448   | + | GTGACCTATGCACCAGACGTGTCCTGGGGCTTTCAACTTGGAAAGGGCATTCAATTAACAGATCGGAAGAGCGGTTTCAG     |
| chr11 | 35250845  | 35250884  | CD44_8449   | + | GTGACCTATGCACCAGACGTAACCTGCAGAATGTGGACATGAAGATTGGGGTGTAAACCCAGATCGGAAGAGCGGTTTCAG    |
| chr11 | 35250891  | 35250930  | CD44_8450   | + | GTGACCTATGCACCAGACGTTATCTGGAAAGAAAACCCCTTGGAAACATAACCATTAGATCGGAAGAGCGGTTTCAG        |
| chr19 | 10678104  | 10678143  | CDKN2D_8451 | + | GTGACCTATGCACCAGACGTGACAGAGATCAGGAGGCTCCCAAGGGAGGTTCCACAAGATCGGAAGAGCGGTTTCAG        |
| chr19 | 10679340  | 10679379  | CDKN2D_8452 | + | GTGACCTATGCACCAGACGTGCGGCCTGCAAGGCCCGCCCGCCCGCCCGCCCGCCTAGATCGGAAGAGCGGTTTCAG        |
| chr5  | 149433798 | 149433837 | CSF1R_8453  | + | GTGACCTATGCACCAGACGTGAGGGACCAGAACTGTCAGTCCAGATCCATCAGGCCAGAGATCGGAAGAGCGGTTTCAG      |
| chr5  | 149434004 | 149434043 | CSF1R_8454  | + | GTGACCTATGCACCAGACGTGGACAGAGGATGCCCATGGGCAGCTCCCTAGGGTCCAGGGAGATCGGAAGAGCGGTTTCAG    |
| chr5  | 149434910 | 149434949 | CSF1R_8455  | + | GTGACCTATGCACCAGACGTCAAGATCAGGTAGAGGCCATGCCACTTGTCTTCCCCAAGATCGGAAGAGCGGTTTCAG       |
| chr5  | 149435711 | 149435750 | CSF1R_8456  | + | GTGACCTATGCACCAGACGTAGTCCCCAGTTATTTGGCCCCGACTTCCACCCCTCCAGATCGGAAGAGCGGTTTCAG        |
| chr5  | 149435915 | 149435954 | CSF1R_8457  | + | GTGACCTATGCACCAGACGTGCACTGCAGGGTTAGTCTTGGGCTTCTCCTACCTGAGCCAGATCGGAAGAGCGGTTTCAG     |
| chr5  | 149436958 | 149436997 | CSF1R_8458  | + | GTGACCTATGCACCAGACGTAAGAGGCGTCAGGGCAGCCCTGCCACTCCCCACCCCTCAGATCGGAAGAGCGGTTTCAG      |
| chr5  | 149437166 | 149437205 | CSF1R_8459  | + | GTGACCTATGCACCAGACGTGAGAGGGTTGGGGGCGAGAGTCACTCATCACTGCACAGATCGGAAGAGCGGTTTCAG        |
| chr5  | 149439436 | 149439475 | CSF1R_8460  | + | GTGACCTATGCACCAGACGTCAAGGGTGTGGGGTAGGGAGGTTGCTGAGTGTCTCCCTCCAGATCGGAAGAGCGGTTTCAG    |
| chr5  | 149440546 | 149440585 | CSF1R_8461  | + | GTGACCTATGCACCAGACGTGAACCACAGTCCAAAGCAGGGGAGAGGGCAGGACAGAAAGATCGGAAGAGCGGTTTCAG      |
| chr5  | 149441169 | 149441208 | CSF1R_8462  | + | GTGACCTATGCACCAGACGTGACAGGCTCCCTAAGTCCCTGGGCACCAAGGGCCTCTGTAGATCGGAAGAGCGGTTTCAG     |
| chr5  | 149441423 | 149441462 | CSF1R_8463  | + | GTGACCTATGCACCAGACGTGGAAGGGAGCAGTGGCAGTGGGGCTGGCAGGCAGTTCCAGATCGGAAGAGCGGTTTCAG      |
| chr5  | 149447904 | 149447943 | CSF1R_8464  | + | GTGACCTATGCACCAGACGTTGAAGCAAAGCAGTGAAGCAGGGAGGGTGCCTCCGAGCCAGATCGGAAGAGCGGTTTCAG     |
| chr5  | 149449637 | 149449676 | CSF1R_8465  | + | GTGACCTATGCACCAGACGTGAGAAATGTGGCTCAGAGCTTCCAGGGTCCAGCAGCCAGCAAGATCGGAAGAGCGGTTTCAG   |
| chr5  | 149449876 | 149449915 | CSF1R_8466  | + | GTGACCTATGCACCAGACGTAAGGAGGAGGCCCAAGTCACACTTTCCCGCCACCTCCAGATCGGAAGAGCGGTTTCAG       |
| chr5  | 149450145 | 149450184 | CSF1R_8467  | + | GTGACCTATGCACCAGACGTGAACAGTGGTGTGGTGGAGCCCGACTAGTATGGCCAGATCGGAAGAGCGGTTTCAG         |
| chr5  | 149453067 | 149453106 | CSF1R_8468  | + | GTGACCTATGCACCAGACGTGAAACACACAAGCATCTGGCATTTAGTGGAAAGATGCTCTTGTAGATCGGAAGAGCGGTTTCAG |

|       |           |           |             |   |                                                                                       |
|-------|-----------|-----------|-------------|---|---------------------------------------------------------------------------------------|
| chr5  | 149457822 | 149457861 | CSF1R_8469  | + | GTGACCTATGCACCAGACGTGGGAGAGACCCCTGAACACCCAGGCTCCCTGAACATGATAAGATCGGAAGAGCGGTTTCAG     |
| chr5  | 149459910 | 149459949 | CSF1R_8470  | + | GTGACCTATGCACCAGACGTGGAGGGCACAGGGTTACAACCTGCCCTCCCTCCACTGGGCCAGATCGGAAGAGCGGTTTCAG    |
| chr5  | 149460598 | 149460637 | CSF1R_8471  | + | GTGACCTATGCACCAGACGTAGAGGGACAGCAGACAGAAGTGGGTCTAGGATGCGCCCCAGATCGGAAGAGCGGTTTCAG      |
| chr5  | 149466001 | 149466040 | CSF1R_8472  | + | GTGACCTATGCACCAGACGTGGGAAGTGGCAGGCAGGTGCAGGGCTGCAAGGTGCCCAGGAGATCGGAAGAGCGGTTTCAG     |
| chr1  | 97544713  | 97544752  | DPYD_8473   | + | GTGACCTATGCACCAGACGTAAATAGAGGGTATTGATGTCCTACTGACCACAAAAGGTCAACAAGATCGGAAGAGCGGTTTCAG  |
| chr1  | 97548037  | 97548076  | DPYD_8474   | + | GTGACCTATGCACCAGACGTCCACTGAATTACTTAGCAAGCTCATTTTAAAACATTTTCAAGATCGGAAGAGCGGTTTCAG     |
| chr1  | 97564239  | 97564238  | DPYD_8475   | + | GTGACCTATGCACCAGACGTAAACACAAAATGAAGGAGCATTTTGTCTCAGAGAAGAGAAAGATCGGAAGAGCGGTTTCAG     |
| chr1  | 97658815  | 97658854  | DPYD_8476   | + | GTGACCTATGCACCAGACGTGACAGCAGTCAACCAAGTGTCAAACCAAGAGATAAATTCTCAGATCGGAAGAGCGGTTTCAG    |
| chr1  | 97700561  | 97700600  | DPYD_8477   | + | GTGACCTATGCACCAGACGTTCAGAATAATCAATGGTTAGCACACTGACCCTTGTAGTATAGATCGGAAGAGCGGTTTCAG     |
| chr1  | 97770945  | 97770984  | DPYD_8478   | + | GTGACCTATGCACCAGACGTGACATCAACATTTTCATGACGCTCTTATAAGACACGATAGAGATCGGAAGAGCGGTTTCAG     |
| chr1  | 97771864  | 97771903  | DPYD_8479   | + | GTGACCTATGCACCAGACGTAGGTCGGTTAAATATAGAAAATAAAGAATTGTGATCAGATCGGAAGAGCGGTTTCAG         |
| chr1  | 97839211  | 97839250  | DPYD_8480   | + | GTGACCTATGCACCAGACGTGAAAGGAAAATGAAAGAAAAGGCAAAAGCTTTATTTATATAAGATCGGAAGAGCGGTTTCAG    |
| chr1  | 97848028  | 97848067  | DPYD_8481   | + | GTGACCTATGCACCAGACGTAAAAACAAAAGAATATAAGTCCAAGTAGTTATCCAGTTGATAGATCGGAAGAGCGGTTTCAG    |
| chr1  | 97915790  | 97915829  | DPYD_8482   | + | GTGACCTATGCACCAGACGTAGTAAAGATATTGAGTCTCCTTTTGACAAAAGAAAAGCTATAGATCGGAAGAGCGGTTTCAG    |
| chr1  | 97981508  | 97981547  | DPYD_8483   | + | GTGACCTATGCACCAGACGTCAAACCAATACTTGGTTTCATATTACATCTAAATTTGTCAGATCGGAAGAGCGGTTTCAG      |
| chr1  | 98015311  | 98015350  | DPYD_8484   | + | GTGACCTATGCACCAGACGTAAAGTGA AAAACAATAGACAATCACTAGTCAACAGACAATTAGATCGGAAGAGCGGTTTCAG   |
| chr1  | 98039537  | 98039576  | DPYD_8485   | + | GTGACCTATGCACCAGACGTACAGAACAAGAAAAGTAAATTTGAAATTTTCTTATTTCCACAGATCGGAAGAGCGGTTTCAG    |
| chr1  | 98058954  | 98058993  | DPYD_8486   | + | GTGACCTATGCACCAGACGTAAAAGGAAAACCCCAATTTTCAAGTAGAGAAAACCAATTTCTGCAGATCGGAAGAGCGGTTTCAG |
| chr1  | 98060733  | 98060772  | DPYD_8487   | + | GTGACCTATGCACCAGACGTAAAATTTATAAAATATCATTAGCAGGAGGAGGGGCTTTTCCAGATCGGAAGAGCGGTTTCAG    |
| chr1  | 98144749  | 98144788  | DPYD_8488   | + | GTGACCTATGCACCAGACGTCAATATTTTGCATAAAGAAAATTTGGCATATGATTAATTAAGATCGGAAGAGCGGTTTCAG     |
| chr1  | 98157365  | 98157404  | DPYD_8489   | + | GTGACCTATGCACCAGACGTAGGAGAAAAGAAAACAGGCATCAGTAGAAAATGACCAATAGATCGGAAGAGCGGTTTCAG      |
| chr1  | 98165114  | 98165153  | DPYD_8490   | + | GTGACCTATGCACCAGACGTATCAATTTGTCATGGTTAAAATTTTGAAGTACTTACATCAGATCGGAAGAGCGGTTTCAG      |
| chr1  | 98187238  | 98187277  | DPYD_8491   | + | GTGACCTATGCACCAGACGTAAATAAAAATAAAAATTTTACTACTTAAAAATATACTTTAAAGATCGGAAGAGCGGTTTCAG    |
| chr1  | 98206046  | 98206085  | DPYD_8492   | + | GTGACCTATGCACCAGACGTAAAATAACTATGTTAAGAACTACAAGATAAGTGAGATAATAGATCGGAAGAGCGGTTTCAG     |
| chr1  | 98293763  | 98293802  | DPYD_8493   | + | GTGACCTATGCACCAGACGTAAAAATAATGCATTAATTCTCTAAGATCCTGAGAAAATAGATCGGAAGAGCGGTTTCAG       |
| chr1  | 98348941  | 98348980  | DPYD_8494   | + | GTGACCTATGCACCAGACGTCAATAAACAATGTGTAATATATGAAAATATGTTGGCATTAGATCGGAAGAGCGGTTTCAG      |
| chr1  | 98386489  | 98386528  | DPYD_8495   | + | GTGACCTATGCACCAGACGTACAGTCTCGAGTCTGCCAGTGACAACCCCTCCTTGCCTCCAGATCGGAAGAGCGGTTTCAG     |
| chr14 | 64694343  | 64694382  | ESR2_8496   | + | GTGACCTATGCACCAGACGTGATGCGGGACAAGTCAAAGTTGCAGTGAAAGGAAGTGTGGAGATCGGAAGAGCGGTTTCAG     |
| chr14 | 64700052  | 64700091  | ESR2_8497   | + | GTGACCTATGCACCAGACGTAAAAGGGTCTGAGATTCCCTCTCCGAGGCACAGGATCGGAAGAGCGGTTTCAG             |
| chr14 | 64701879  | 64701918  | ESR2_8498   | + | GTGACCTATGCACCAGACGTAAATAAAAGCCAGAAGTCAATGCTCTGAGCAAAAGGACGAGAAGATCGGAAGAGCGGTTTCAG   |
| chr14 | 64716408  | 64716447  | ESR2_8499   | + | GTGACCTATGCACCAGACGTTCGTTTGGAAAATTAAGGAACATAGCTTCAGGAAACCATCAGATCGGAAGAGCGGTTTCAG     |
| chr14 | 64724093  | 64724132  | ESR2_8500   | + | GTGACCTATGCACCAGACGTCAAGAGGCGGTGAGACACCCCAACCCCTCCTCCTCAGCTCAGATCGGAAGAGCGGTTTCAG     |
| chr14 | 64727477  | 64727516  | ESR2_8501   | + | GTGACCTATGCACCAGACGTAAAGCAGAGTCAATTCGAATTTGCCAGGGTAAAACCCGAGTCAAGATCGGAAGAGCGGTTTCAG  |
| chr14 | 64735640  | 64735679  | ESR2_8502   | + | GTGACCTATGCACCAGACGTGGGGAGGGAAAAAGATTTGCTATGATCTTTAGTTAGATCGGAAGAGCGGTTTCAG           |
| chr14 | 64746882  | 64746921  | ESR2_8503   | + | GTGACCTATGCACCAGACGTAAAGAAAATACATTGAACAGAGCATAAAAGGGAAAAGATAAGATCGGAAGAGCGGTTTCAG     |
| chr14 | 64749714  | 64749753  | ESR2_8504   | + | GTGACCTATGCACCAGACGTAAACAGCTGAGAAAAACCTTGCAAGAAGAGGCACAAAGGTAGATCGGAAGAGCGGTTTCAG     |
| chr22 | 29664349  | 29664388  | EWSR1_8505  | + | GTGACCTATGCACCAGACGTTGAACTGCGGTGCGCGCCGGGTAGCCGGAACGCCCAAAAGATCGGAAGAGCGGTTTCAG       |
| chr22 | 29668252  | 29668291  | EWSR1_8506  | + | GTGACCTATGCACCAGACGTCTTTTATAACCGTATTTTGTGTGTGATTAATATTTTTTGAAGATCGGAAGAGCGGTTTCAG     |
| chr22 | 29668431  | 29668470  | EWSR1_8507  | + | GTGACCTATGCACCAGACGTAAATAATTACATGTAGCTGCACCTCAAAGTAAATCAGTAAGATCGGAAGAGCGGTTTCAG      |
| chr22 | 29669864  | 29669903  | EWSR1_8508  | + | GTGACCTATGCACCAGACGTCTTGGAGAGATTTTGGTGGTCTTGGCTAGGGCATTGGAGATCGGAAGAGCGGTTTCAG        |
| chr22 | 29674216  | 29674255  | EWSR1_8509  | + | GTGACCTATGCACCAGACGTGGTGCCTTAAATGCGTCACTTCTATGTTGGAGGGAAAAGATAAGATCGGAAGAGCGGTTTCAG   |
| chr22 | 29678557  | 29678596  | EWSR1_8510  | + | GTGACCTATGCACCAGACGTTTTTTGTGGCAAAAACAAAACAGTGACAAAACAGTTTTTTAGATCGGAAGAGCGGTTTCAG     |
| chr22 | 29683134  | 29683173  | EWSR1_8511  | + | GTGACCTATGCACCAGACGTAAAGAGAGAAAACAAAATAAGAATGAATGTGTTTAGAGTTAGATCGGAAGAGCGGTTTCAG     |
| chr22 | 29684786  | 29684825  | EWSR1_8512  | + | GTGACCTATGCACCAGACGTACCTTTTTCTCCTTTTACCTAATTTTGTTCATCCATAGGAAGATCGGAAGAGCGGTTTCAG     |
| chr22 | 29687599  | 29687638  | EWSR1_8513  | + | GTGACCTATGCACCAGACGTGAGTATTACCATAGATAGTGTTTAAAAAAAATGCAGTCAAGATCGGAAGAGCGGTTTCAG      |
| chr22 | 29688169  | 29688208  | EWSR1_8514  | + | GTGACCTATGCACCAGACGTATTCTAGTTGCTGCTTATGCTGCTTGTGTAATTAATAGATCGGAAGAGCGGTTTCAG         |
| chr22 | 29688606  | 29688645  | EWSR1_8515  | + | GTGACCTATGCACCAGACGTGCATAACCAGGTCATCTGGCAGAACTTTAAACCACAGAGCAGATCGGAAGAGCGGTTTCAG     |
| chr22 | 29692369  | 29692408  | EWSR1_8516  | + | GTGACCTATGCACCAGACGTCTCACTGGCATTCTTAATCTCCCTGGCTATAGAATATGGCAGATCGGAAGAGCGGTTTCAG     |
| chr22 | 29693950  | 29693989  | EWSR1_8517  | + | GTGACCTATGCACCAGACGTGAGCTCCTATGTTGCATTAAGAGGTTTTTCAGTACACTTCAGATCGGAAGAGCGGTTTCAG     |
| chr22 | 29694896  | 29694935  | EWSR1_8518  | + | GTGACCTATGCACCAGACGTGCTTTGGCAAATGATACCTACGAGTGAAGCCACCCTTCAGATCGGAAGAGCGGTTTCAG       |
| chr22 | 29695332  | 29695371  | EWSR1_8519  | + | GTGACCTATGCACCAGACGTGTTTCATGAGTGTCCCTCAGCTCCTGGTGCTAAACCTCAGATCGGAAGAGCGGTTTCAG       |
| chr22 | 29695852  | 29695891  | EWSR1_8520  | + | GTGACCTATGCACCAGACGTGTGAAAAGACAGCTGTGGCGCCGACAGTAAAGGACAGATCGGAAGAGCGGTTTCAG          |
| chr22 | 29696162  | 29696201  | EWSR1_8521  | + | GTGACCTATGCACCAGACGTCCCGCAGAGCTGCATTGACTACCAGATTTATTTTTTAAACAGATCGGAAGAGCGGTTTCAG     |
| chr3  | 10070416  | 10070455  | FANCD2_8522 | + | GTGACCTATGCACCAGACGTAGTCAATTTGTTGCTTTATTTCTGTAGCAATGTGTGAGGCAGATCGGAAGAGCGGTTTCAG     |
| chr3  | 10074667  | 10074706  | FANCD2_8523 | + | GTGACCTATGCACCAGACGTAAATCTAATTTTATTCTCTGGGTTTAAATGAAATAGTTTCAGGATCGGAAGAGCGGTTTCAG    |
| chr3  | 10076231  | 10076270  | FANCD2_8524 | + | GTGACCTATGCACCAGACGTTCCTGGTATTTTGGCTTGTGCCAGCATAACTTAGAAAAGATCGGAAGAGCGGTTTCAG        |
| chr3  | 10076493  | 10076532  | FANCD2_8525 | + | GTGACCTATGCACCAGACGTGAGGCATGAAATCTTCTGTAATCTGCTGTTTGGCAAAGATCGGAAGAGCGGTTTCAG         |
| chr3  | 10076928  | 10076967  | FANCD2_8526 | + | GTGACCTATGCACCAGACGTCACTTTTTCTGTGAACATTTGATGGAAGAGGTTTGTGTGAGATCGGAAGAGCGGTTTCAG      |

|       |          |          |             |   |                                                                                      |
|-------|----------|----------|-------------|---|--------------------------------------------------------------------------------------|
| chr3  | 10078034 | 10078073 | FANCD2_8527 | + | GTGACCTATGCACCAGACGTTTATTATGGAATGTTCAAAGTACCTGTAGTACTTAAGTTAGATCGGAAGAGCGGTTTCAG     |
| chr3  | 10081052 | 10081091 | FANCD2_8528 | + | GTGACCTATGCACCAGACGTTGACCTTTATCTCTTGAATTTAAAGAGTATGTTTCTCATATAGATCGGAAGAGCGGTTTCAG   |
| chr3  | 10081540 | 10081579 | FANCD2_8529 | + | GTGACCTATGCACCAGACGTCCTCTGTGCATCATCTAAGTGAGGCTCAGCTATGGGGTTTCAGATCGGAAGAGCGGTTTCAG   |
| chr3  | 10083405 | 10083444 | FANCD2_8530 | + | GTGACCTATGCACCAGACGTCCTCAGCTTTCCAGAAACAGAGCCAGCTTTCCAACCTCCCAGATCGGAAGAGCGGTTTCAG    |
| chr3  | 10084358 | 10084397 | FANCD2_8531 | + | GTGACCTATGCACCAGACGTATATCCCATCACACCTAGATAAAAGCAACTTAAGTGCCAATAGATCGGAAGAGCGGTTTCAG   |
| chr3  | 10084845 | 10084884 | FANCD2_8532 | + | GTGACCTATGCACCAGACGTCCTCCTCACACGATGTACAATTTTCTGACATCCCACATAGATCGGAAGAGCGGTTTCAG      |
| chr3  | 10085287 | 10085326 | FANCD2_8533 | + | GTGACCTATGCACCAGACGTTGGAACCTTTGATTATCAAGGAGCAAATGAGTGGCAATTAGAGATCGGAAGAGCGGTTTCAG   |
| chr3  | 10085559 | 10085598 | FANCD2_8534 | + | GTGACCTATGCACCAGACGTTGTACTATGCATTTTTCAGTATTGCAGACTTAAAGTAAATGAGATCGGAAGAGCGGTTTCAG   |
| chr3  | 10089746 | 10089785 | FANCD2_8535 | + | GTGACCTATGCACCAGACGTACATTTATTTTGGCAAGGAGGGAACACAGAAAGGAAATAGATCGGAAGAGCGGTTTCAG      |
| chr3  | 10091200 | 10091239 | FANCD2_8536 | + | GTGACCTATGCACCAGACGTGGCTTCTGTACTTTAGATATTGAATACTATAATTGGTGAGATCGGAAGAGCGGTTTCAG      |
| chr3  | 10102098 | 10102137 | FANCD2_8537 | + | GTGACCTATGCACCAGACGTAGATTCTGACTTCTGTGGTTTAAAGATCAGTTAATCTTCTGCTAGATCGGAAGAGCGGTTTCAG |
| chr3  | 10105606 | 10105645 | FANCD2_8538 | + | GTGACCTATGCACCAGACGTTTGTCTTTTCTTAAAGCAATAAAGCATGAGAGCTGCTTTAAGATCGGAAGAGCGGTTTCAG    |
| chr3  | 10106124 | 10106163 | FANCD2_8539 | + | GTGACCTATGCACCAGACGTTTACCTGTGGCTGGCTTGGTTGCACCTGGTGAAGTTACATCAAAGATCGGAAGAGCGGTTTCAG |
| chr3  | 10106570 | 10106609 | FANCD2_8540 | + | GTGACCTATGCACCAGACGTTTTTCTTTCTAAACCTGTTAGTGTGTTTGAATGTTTCATGAGATCGGAAGAGCGGTTTCAG    |
| chr3  | 10107189 | 10107228 | FANCD2_8541 | + | GTGACCTATGCACCAGACGTAAGTCATCAGATCCTTCTCTTTATACTCTTCTTTGGTATAGATCGGAAGAGCGGTTTCAG     |
| chr3  | 10107674 | 10107713 | FANCD2_8542 | + | GTGACCTATGCACCAGACGTTTAAATAGGATGTTTCAGCTTATTGTGCATAGTTTTCTCAAAGATCGGAAGAGCGGTTTCAG   |
| chr3  | 10109012 | 10109051 | FANCD2_8543 | + | GTGACCTATGCACCAGACGTTGCTTACTACTGGTAGTACTACTAGGCCAGTAGTGAGGCAAGATCGGAAGAGCGGTTTCAG    |
| chr3  | 10114676 | 10114715 | FANCD2_8544 | + | GTGACCTATGCACCAGACGTTTCTTCCCTCTGTCTGTCTGTCTCTGCTCCAAAGCTTCAATGAGATCGGAAGAGCGGTTTCAG  |
| chr3  | 10115057 | 10115096 | FANCD2_8545 | + | GTGACCTATGCACCAGACGTGATGGGTATCCGTGAAGGTTTGTGACATCCCAGTGAGATTAGATCGGAAGAGCGGTTTCAG    |
| chr3  | 10116368 | 10116407 | FANCD2_8546 | + | GTGACCTATGCACCAGACGTGGCTAGGATCTCAGAATTTAATCTTCTTTAGAAAAGTTCCAGATCGGAAGAGCGGTTTCAG    |
| chr3  | 10119892 | 10119931 | FANCD2_8547 | + | GTGACCTATGCACCAGACGTGCAGAACATAGGACTTGGGCATAGTGGATTGGGAACAAGATCGGAAGAGCGGTTTCAG       |
| chr3  | 10122923 | 10122962 | FANCD2_8548 | + | GTGACCTATGCACCAGACGTTAGACTTAGAAGCTGCTAAGCAAAATAGAGTTTCATTTTAGATCGGAAGAGCGGTTTCAG     |
| chr3  | 10123159 | 10123198 | FANCD2_8549 | + | GTGACCTATGCACCAGACGTGGGAAGTGGGAGAGAAGATGATATATACTGCTTTTATAGATCGGAAGAGCGGTTTCAG       |
| chr3  | 10127617 | 10127656 | FANCD2_8550 | + | GTGACCTATGCACCAGACGTTTACATAGCCAAAGATTTGTTGCCAAAGAACTCCTAGGAAGATCGGAAGAGCGGTTTCAG     |
| chr3  | 10130237 | 10130276 | FANCD2_8551 | + | GTGACCTATGCACCAGACGTTGGTCTTCTTCCAATGAGCCAAATAGCTTTTTTCTATTTTGGATCGGAAGAGCGGTTTCAG    |
| chr3  | 10130645 | 10130684 | FANCD2_8552 | + | GTGACCTATGCACCAGACGTTCTTCTCCAGTTTTTCCCTTAAAGATAGAATCATCATCAAGATCGGAAGAGCGGTTTCAG     |
| chr3  | 10132080 | 10132119 | FANCD2_8553 | + | GTGACCTATGCACCAGACGTTAATAGTCACCTCAAGAAAGTGACTTTGGATTACTTGAAGATCGGAAGAGCGGTTTCAG      |
| chr3  | 10133947 | 10133986 | FANCD2_8554 | + | GTGACCTATGCACCAGACGTAGACTGCTTGACACATCTCACCAAATAACTGCAGAAACCAAGATCGGAAGAGCGGTTTCAG    |
| chr3  | 10135018 | 10135057 | FANCD2_8555 | + | GTGACCTATGCACCAGACGTTACTGGCCCTGTTTATATTTATCTTCTGTTGATCAGATCGGAAGAGCGGTTTCAG          |
| chr3  | 10136058 | 10136097 | FANCD2_8556 | + | GTGACCTATGCACCAGACGTAGACGACAGACAACAAGATATGCACTGAAGAGTTGCTCAGAAGATCGGAAGAGCGGTTTCAG   |
| chr3  | 10136969 | 10137008 | FANCD2_8557 | + | GTGACCTATGCACCAGACGTGAGCAGGTTCTATCAGCAGCCTGCCTGTTGGCTTAACTGAGATCGGAAGAGCGGTTTCAG     |
| chr3  | 10138167 | 10138206 | FANCD2_8558 | + | GTGACCTATGCACCAGACGTGATCCTGCTAGTGATAATCCCCTACTCTTATTCTTTGTGAAGATCGGAAGAGCGGTTTCAG    |
| chr3  | 10140510 | 10140549 | FANCD2_8559 | + | GTGACCTATGCACCAGACGTAAAACCCACCAAGCTGGCCACTGATGGTTGCATTTTGTAGATCGGAAGAGCGGTTTCAG      |
| chr3  | 10140645 | 10140684 | FANCD2_8560 | + | GTGACCTATGCACCAGACGTGCTTATATATTTTTGGGACCAGAAACAACAGACACAAGATCGGAAGAGCGGTTTCAG        |
| chr3  | 10142957 | 10142996 | FANCD2_8561 | + | GTGACCTATGCACCAGACGTAATTGTTCCTGCTTGTGCTCTGCGACCCCTGTGATCAAAGATCGGAAGAGCGGTTTCAG      |
| chr14 | 75745837 | 75745876 | FOS_8562    | + | GTGACCTATGCACCAGACGTTCTCCGCTCGCCGCGGGGCGGGGGCTTGGGGTCCGCGGAGAGATCGGAAGAGCGGTTTCAG    |
| chr14 | 75746842 | 75746881 | FOS_8563    | + | GTGACCTATGCACCAGACGTTAGCGTACTTCTCTGGGAATGTGGGGCTGGGTGGGAAGATCGGAAGAGCGGTTTCAG        |
| chr14 | 75747381 | 75747420 | FOS_8564    | + | GTGACCTATGCACCAGACGTTGTGGGTTGCTCCTTTTTTAAACTTAAGGGGAAAGTTGGAAGATCGGAAGAGCGGTTTCAG    |
| chr14 | 75748138 | 75748177 | FOS_8565    | + | GTGACCTATGCACCAGACGTAAGGGGAGGCAGCCGGCACCACAAGTGCCACTGCCCGAGAGATCGGAAGAGCGGTTTCAG     |
| chr14 | 75747817 | 75747856 | FOS_8566    | + | GTGACCTATGCACCAGACGTTCCAGGCCAGTGGCTGTGAGACGCCGCTCCGTGCCAGAAGATCGGAAGAGCGGTTTCAG      |
| chr11 | 33881132 | 33881171 | LMO2_8567   | + | GTGACCTATGCACCAGACGTAGAAGAAAAGCTAAGAAGACAGTCAAAGGGACAACCTCGTGAAGATCGGAAGAGCGGTTTCAG  |
| chr11 | 33886374 | 33886413 | LMO2_8568   | + | GTGACCTATGCACCAGACGTGGCCAAAGCATCAGGGACAGCCTCACCAGAGTGAGACCAGCAGATCGGAAGAGCGGTTTCAG   |
| chr11 | 33890943 | 33890982 | LMO2_8569   | + | GTGACCTATGCACCAGACGTGGCGGGTGTCCGGCGCGGGGGCGCTCCCTTTGTGGCCGAGATCGGAAGAGCGGTTTCAG      |
| chr11 | 33891273 | 33891312 | LMO2_8570   | + | GTGACCTATGCACCAGACGTCCGCCGCCACCGCCCGTCCCTCTCGCGCGCTGTGCGCGGAGATCGGAAGAGCGGTTTCAG     |
| chr19 | 15272536 | 15272575 | NOTCH3_8571 | + | GTGACCTATGCACCAGACGTAGAACCACAGAGGTCAGCGAAACCCAGCTAACAGTAGCAGATCGGAAGAGCGGTTTCAG      |
| chr19 | 15273384 | 15273423 | NOTCH3_8572 | + | GTGACCTATGCACCAGACGTAAGGGAGGAGAGGTCAGGACCAGCCCTGTCTGGGCCAGATCGGAAGAGCGGTTTCAG        |
| chr19 | 15276337 | 15276376 | NOTCH3_8573 | + | GTGACCTATGCACCAGACGTGAGTGGATGCAGCAGGAGGGGTCATGGCAGGAACAGAGGAAGATCGGAAGAGCGGTTTCAG    |
| chr19 | 15276913 | 15276952 | NOTCH3_8574 | + | GTGACCTATGCACCAGACGTAGGAGTGTGTCAGCAGGAAGGTAACACAGGGCCTTTTCCAGATCGGAAGAGCGGTTTCAG     |
| chr19 | 15278233 | 15278272 | NOTCH3_8575 | + | GTGACCTATGCACCAGACGTAGGACCCCTGGATCTCAGATCTCACCTTTGGTGCTGGGAGATCGGAAGAGCGGTTTCAG      |
| chr19 | 15280992 | 15281031 | NOTCH3_8576 | + | GTGACCTATGCACCAGACGTATGGGAAGAGGGATGTGAGGGGGACACTAGAGGTGTCCAAGATCGGAAGAGCGGTTTCAG     |
| chr19 | 15281375 | 15281414 | NOTCH3_8577 | + | GTGACCTATGCACCAGACGTGAAGCAGAGGGCGGGCTTCAGCCGAGGGCGGGCTTTGGAGATCGGAAGAGCGGTTTCAG      |
| chr19 | 15281647 | 15281686 | NOTCH3_8578 | + | GTGACCTATGCACCAGACGTAGCAGAGGGGACAGAGGCTCAAATAATGCCGATCGGAAGATCGGAAGAGCGGTTTCAG       |
| chr19 | 15285222 | 15285261 | NOTCH3_8579 | + | GTGACCTATGCACCAGACGTAGGGTGAGGCAGAGAGGGCGGAGTCAGGGGTTCAGAGGAGAGATCGGAAGAGCGGTTTCAG    |
| chr19 | 15289763 | 15289802 | NOTCH3_8580 | + | GTGACCTATGCACCAGACGTGGGAGCATGTAGATCAGCCACAATGGGGAAATGACAGGCGAGATCGGAAGAGCGGTTTCAG    |
| chr19 | 15290104 | 15290143 | NOTCH3_8581 | + | GTGACCTATGCACCAGACGTAAACAGGGGTTGTTCAAGAGGGAATGAAGACAGCCTCTCAAAGATCGGAAGAGCGGTTTCAG   |
| chr19 | 15290318 | 15290357 | NOTCH3_8582 | + | GTGACCTATGCACCAGACGTGAAGAGAGGGGACCCACTCAGCTTAGTGGGACACAGACCAGATCGGAAGAGCGGTTTCAG     |
| chr19 | 15291078 | 15291117 | NOTCH3_8583 | + | GTGACCTATGCACCAGACGTGAGAGTGGCAGCAGGAACACTGAGTAAACCCATACATCCCCAGATCGGAAGAGCGGTTTCAG   |
| chr19 | 15291650 | 15291689 | NOTCH3_8584 | + | GTGACCTATGCACCAGACGTAGCATCAGACTCAGTACTGTGGGGTGGGGGTAGTCTGGAGATCGGAAGAGCGGTTTCAG      |

|       |           |           |             |   |                                                                                    |
|-------|-----------|-----------|-------------|---|------------------------------------------------------------------------------------|
| chr19 | 15292623  | 15292662  | NOTCH3_8585 | + | GTGACCTATGCACCAGACGTGAGGAAGCGGTTCTGGTACCTACCTTGCCCCATTAGCCAGATCGGAAGAGCGGTTTCAG    |
| chr19 | 15295272  | 15295311  | NOTCH3_8586 | + | GTGACCTATGCACCAGACGTGAGCAAGGTTACACCTAGGGTTACAGGGTACAGAGCAGGATCGGAAGAGCGGTTTCAG     |
| chr19 | 15295841  | 15295880  | NOTCH3_8587 | + | GTGACCTATGCACCAGACGTTGGAAGAGAGGGAAGCAGAGATAGCCTTGAGGGACTCCCTAGATCGGAAGAGCGGTTTCAG  |
| chr19 | 15296230  | 15296269  | NOTCH3_8588 | + | GTGACCTATGCACCAGACGTAAAGTAGTCAGGCCAGGGAGGTGGGCCAGGGAGAGGGGCAGATCGGAAGAGCGGTTTCAG   |
| chr19 | 15296501  | 15296540  | NOTCH3_8589 | + | GTGACCTATGCACCAGACGTCACAAGCAATCTCATCTCAGAACAAGTCAGCAGGGACAAAGATCGGAAGAGCGGTTTCAG   |
| chr19 | 15297810  | 15297849  | NOTCH3_8590 | + | GTGACCTATGCACCAGACGTGGAACATGGCATGGAGTGGCCACCACCTGTGCCCACTAGAAAGATCGGAAGAGCGGTTTCAG |
| chr19 | 15298160  | 15298199  | NOTCH3_8591 | + | GTGACCTATGCACCAGACGTAAAGAGGTCAGGCTCCGCCACTTGCCAGGGGCCTGCCCAAGATCGGAAGAGCGGTTTCAG   |
| chr19 | 15298816  | 15298855  | NOTCH3_8592 | + | GTGACCTATGCACCAGACGTGAGTGGGATGAGCAGAGGCCCAAAGGGTGAGAGCAGTAAGATCGGAAGAGCGGTTTCAG    |
| chr19 | 15299170  | 15299209  | NOTCH3_8593 | + | GTGACCTATGCACCAGACGTGAATAGGGCTTAGGAAAGCGGGGCTACCCTATGGTGTGAAGATCGGAAGAGCGGTTTCAG   |
| chr19 | 15299996  | 15300035  | NOTCH3_8594 | + | GTGACCTATGCACCAGACGTGAGTGGGATCGGTGTGGGCGTGGCTGGCCGGGACCCCTCAGATCGGAAGAGCGGTTTCAG   |
| chr19 | 15300250  | 15300289  | NOTCH3_8595 | + | GTGACCTATGCACCAGACGTGTAAGCAGAAGTCATAGGCAGATCTTCTGCTCTGCCAAAGATCGGAAGAGCGGTTTCAG    |
| chr19 | 15302479  | 15302518  | NOTCH3_8596 | + | GTGACCTATGCACCAGACGTGATGTCAGCAGCTCCAGCCACTGGCGCATGTCCACCCGAAGATCGGAAGAGCGGTTTCAG   |
| chr19 | 15302689  | 15302728  | NOTCH3_8597 | + | GTGACCTATGCACCAGACGTAGGGGCAAGGATGGTCACCCGCGGGTGGCCTGCTGTCCAGATCGGAAGAGCGGTTTCAG    |
| chr19 | 15303120  | 15303159  | NOTCH3_8598 | + | GTGACCTATGCACCAGACGTGAGGACAGGGTGAGTTTAGGACTGACCACACCCCGACTAAGATCGGAAGAGCGGTTTCAG   |
| chr19 | 15303341  | 15303380  | NOTCH3_8599 | + | GTGACCTATGCACCAGACGTAGATGGCTTGGTTGGGCAGCACAGGGCAGGATGGCCCCAGAGATCGGAAGAGCGGTTTCAG  |
| chr19 | 15308400  | 15308439  | NOTCH3_8600 | + | GTGACCTATGCACCAGACGTGTAAGGAAGGTGGAGGATCAGCCAGGTGCCAGGAACCCAGATCGGAAGAGCGGTTTCAG    |
| chr19 | 15311727  | 15311766  | NOTCH3_8601 | + | GTGACCTATGCACCAGACGTGCGGACCCCTCCCTCTCCCTCCTCCCTGGGCTCCGGGCAGATCGGAAGAGCGGTTTCAG    |
| chr19 | 15271834  | 15271873  | NOTCH3_8602 | + | GTGACCTATGCACCAGACGTACGGGGTCCCTGGGTTGAGCAGTGGGTCGGGTCGCCGGCAGATCGGAAGAGCGGTTTCAG   |
| chr1  | 226549253 | 226549292 | PARP1_8603  | + | GTGACCTATGCACCAGACGTGCTTGTAAAGGACCAACAGCCATACAACAGAGGGTATGTAGATCGGAAGAGCGGTTTCAG   |
| chr1  | 226549795 | 226549834 | PARP1_8604  | + | GTGACCTATGCACCAGACGTGAAGTCACAAGTGACATGAACTGTGAGTACAGATGTGGCAAGATCGGAAGAGCGGTTTCAG  |
| chr1  | 226550872 | 226550911 | PARP1_8605  | + | GTGACCTATGCACCAGACGTGAGGACAGTCTCAGAAGAGGCCCTTACACTGGGCTCTCGAAGATCGGAAGAGCGGTTTCAG  |
| chr1  | 226552866 | 226552905 | PARP1_8606  | + | GTGACCTATGCACCAGACGTTAGTAAACAAAGGGAAGGACAAAAGAAGCCATTTGTTACTAGATCGGAAGAGCGGTTTCAG  |
| chr1  | 226553764 | 226553803 | PARP1_8607  | + | GTGACCTATGCACCAGACGTAGAATCTTGGATAGCACAAAAGATACCCAGGAGAGCTAAGATCGGAAGAGCGGTTTCAG    |
| chr1  | 226555320 | 226555359 | PARP1_8608  | + | GTGACCTATGCACCAGACGTAAAAGAAAGCCCGGCTAGGTATCATGGTGAATGAGACAGATCGGAAGAGCGGTTTCAG     |
| chr1  | 226556033 | 226556072 | PARP1_8609  | + | GTGACCTATGCACCAGACGTGGGGACAGAAGGAATGCAAGACTGAGGGAGCAGCTCCAAGAGATCGGAAGAGCGGTTTCAG  |
| chr1  | 226558229 | 226558268 | PARP1_8610  | + | GTGACCTATGCACCAGACGTAGGGGATTTGCTCTGAAAGCTGGGCACTGTGCAGTGTGAAGATCGGAAGAGCGGTTTCAG   |
| chr1  | 226562066 | 226562105 | PARP1_8611  | + | GTGACCTATGCACCAGACGTAAAGCACATTGCTAAGAGACCCAAATCAACAACCTCAAGCAAGATCGGAAGAGCGGTTTCAG |
| chr1  | 226565015 | 226565054 | PARP1_8612  | + | GTGACCTATGCACCAGACGTAAAGGAGGGTGTGAGTACACATCTGTGGGTCAGCTGTCCCAGATCGGAAGAGCGGTTTCAG  |
| chr1  | 226566986 | 226567025 | PARP1_8613  | + | GTGACCTATGCACCAGACGTGGAAGAACCTACAGTTTTTCCCTTGGAGTGTCTAGATAGATCGGAAGAGCGGTTTCAG     |
| chr1  | 226567353 | 226567392 | PARP1_8614  | + | GTGACCTATGCACCAGACGTAAACAAAAATGTAACATGAAGTTAAATGTAACATAAAAAAGATCGGAAGAGCGGTTTCAG   |
| chr1  | 226567876 | 226567915 | PARP1_8615  | + | GTGACCTATGCACCAGACGTTGAAAGGAAAAAACCAAAATACAAGTTTAAACAAAACAGATCGGAAGAGCGGTTTCAG     |
| chr1  | 226568920 | 226568959 | PARP1_8616  | + | GTGACCTATGCACCAGACGTAGGAGAGAATCATTGAGCAAGGCCAGCTCTGGTGTCTCAGATCGGAAGAGCGGTTTCAG    |
| chr1  | 226570895 | 226570934 | PARP1_8617  | + | GTGACCTATGCACCAGACGTTTAAAGTTTTAGTTAAGAGCCAGCTCTCCCTTGGGTAACAGATCGGAAGAGCGGTTTCAG   |
| chr1  | 226573392 | 226573431 | PARP1_8618  | + | GTGACCTATGCACCAGACGTTGGAGAACATGTCAGAGGGCAAATCGGGGACTACAAAAAGATCGGAAGAGCGGTTTCAG    |
| chr1  | 226574154 | 226574193 | PARP1_8619  | + | GTGACCTATGCACCAGACGTGAGCCAGTGGCTGAGAGGCTAGCTCTTTTCAAAGGAAGAAAAGATCGGAAGAGCGGTTTCAG |
| chr1  | 226576467 | 226576506 | PARP1_8620  | + | GTGACCTATGCACCAGACGTACAGGATATGAGAGACAGCCAGACCCATTAAGTCTGAAGATCGGAAGAGCGGTTTCAG     |
| chr1  | 226578336 | 226578375 | PARP1_8621  | + | GTGACCTATGCACCAGACGTAAACATATGTGGTACCAAGGGAGCGACAAGCAAGGATAGTAGATCGGAAGAGCGGTTTCAG  |
| chr1  | 226580026 | 226580065 | PARP1_8622  | + | GTGACCTATGCACCAGACGTAAACAGACAGCAATGCTCATCTCAACAGCCCAAAATGCAAGATCGGAAGAGCGGTTTCAG   |
| chr1  | 226590091 | 226590130 | PARP1_8623  | + | GTGACCTATGCACCAGACGTGAGAAACAGAGGGAAGTAAGTAAGCAGTTAACTTTTACTAGATCGGAAGAGCGGTTTCAG   |
| chr1  | 226595641 | 226595680 | PARP1_8624  | + | GTGACCTATGCACCAGACGTCTCCGCCAAAGCTCCGGAAGCCCTCCAGCCACGACCTAGAAGATCGGAAGAGCGGTTTCAG  |
| chr17 | 64299153  | 64299192  | PRKCA_8625  | + | GTGACCTATGCACCAGACGTGCGCCGGCACTCTGCCGCTCCCTCCCGCTCCGGTTCAGATCGGAAGAGCGGTTTCAG      |
| chr17 | 64302256  | 64302295  | PRKCA_8626  | + | GTGACCTATGCACCAGACGTACTTTTTGGTTTTATTTTCAAGCACAAATGAAATAAGCATAGATCGGAAGAGCGGTTTCAG  |
| chr17 | 64492412  | 64492451  | PRKCA_8627  | + | GTGACCTATGCACCAGACGTCTGAAATCATGATTTGATGTCAATGTGGATTTCTGAGCTTAGATCGGAAGAGCGGTTTCAG  |
| chr17 | 64637595  | 64637634  | PRKCA_8628  | + | GTGACCTATGCACCAGACGTTTTCTTTCCAGTTCATAGCGAGGCTCTGTAGCTCATGCTAGATCGGAAGAGCGGTTTCAG   |
| chr17 | 64641640  | 64641679  | PRKCA_8629  | + | GTGACCTATGCACCAGACGTCTCATCCCGGACAGCATCGTGGCGAGGCATTTGGATGAAAGATCGGAAGAGCGGTTTCAG   |
| chr17 | 64683396  | 64683435  | PRKCA_8630  | + | GTGACCTATGCACCAGACGTTCTCCTTGCATAAATTTTCTTCTATACACCATCGAGTTGAGATCGGAAGAGCGGTTTCAG   |
| chr17 | 64684565  | 64684604  | PRKCA_8631  | + | GTGACCTATGCACCAGACGTGCTTAGGTTGAGTATGTCTCAAAGCATCAGACCATTAGAGATCGGAAGAGCGGTTTCAG    |
| chr17 | 64685176  | 64685215  | PRKCA_8632  | + | GTGACCTATGCACCAGACGTCAAATGCCCGGAAACACCTTTCTTTAGAAAGCCCAACTAGATCGGAAGAGCGGTTTCAG    |
| chr17 | 64728954  | 64728993  | PRKCA_8633  | + | GTGACCTATGCACCAGACGTAGTCTGCTGCAAAATGCAAGGGGCTTCTGCAGAGAATGTCAGATCGGAAGAGCGGTTTCAG  |
| chr17 | 64731791  | 64731830  | PRKCA_8634  | + | GTGACCTATGCACCAGACGTTGGGAATCCCTGCGATGCAAGTACCCAGCTCTCAGAGCTACAGATCGGAAGAGCGGTTTCAG |
| chr17 | 64734984  | 64735023  | PRKCA_8635  | + | GTGACCTATGCACCAGACGTTTTTTAAGTCTTTAATTTGAACAACCAAGTCTCAACCAAGATCGGAAGAGCGGTTTCAG    |
| chr17 | 64737850  | 64737889  | PRKCA_8636  | + | GTGACCTATGCACCAGACGTGAAGCCCTCCTACAGCTCAGCAGAGAGGTTAGCTGGGATCGGAAGAGCGGTTTCAG       |
| chr17 | 64738889  | 64738928  | PRKCA_8637  | + | GTGACCTATGCACCAGACGTGATGATGTTTTCTCAACCAGGACTCCCAAACCTGTAACACAGATCGGAAGAGCGGTTTCAG  |
| chr17 | 64770196  | 64770235  | PRKCA_8638  | + | GTGACCTATGCACCAGACGTGCTACATTTTATGTTTGTGTTTATGCTGTGTATGTGAATAGATCGGAAGAGCGGTTTCAG   |
| chr17 | 64783103  | 64783142  | PRKCA_8639  | + | GTGACCTATGCACCAGACGTTTGATACCTTTTGTATCATGAGCAAGAGCTTTGGTAGAGATCGGAAGAGCGGTTTCAG     |
| chr17 | 64785108  | 64785147  | PRKCA_8640  | + | GTGACCTATGCACCAGACGTAAAGCAGCCTGTTTTCCGAAACCCCATGTCCCAAAATCTAGATCGGAAGAGCGGTTTCAG   |
| chr17 | 64800166  | 64800205  | PRKCA_8641  | + | GTGACCTATGCACCAGACGTGAGAAACAACACTTTCCGACCCCAAGCCCTCCCGCAGAGATCGGAAGAGCGGTTTCAG     |
| chr18 | 45368332  | 45368371  | SMAD2_8642  | + | GTGACCTATGCACCAGACGTGATACAGGAAAATGATTATGAAATTAAGTCCACAGGCAAGATCGGAAGAGCGGTTTCAG    |

|       |           |           |            |   |                                                                                      |
|-------|-----------|-----------|------------|---|--------------------------------------------------------------------------------------|
| chr18 | 45371866  | 45371905  | SMAD2_8643 | + | GTGACCTATGCACCAGACGTAAAAGGTAAAAGAAATGTCAAAGAGTATCATTATAAAAGATCGGAAGAGCGGTTTCAG       |
| chr18 | 45372182  | 45372221  | SMAD2_8644 | + | GTGACCTATGCACCAGACGTATACAAATGAGATTAGTTTTGTAACATTTACTATTTCAGTAGATCGGAAGAGCGGTTTCAG    |
| chr18 | 45377709  | 45377748  | SMAD2_8645 | + | GTGACCTATGCACCAGACGTAGGATTTAAAAATAAATGAAGTATTTCCAGAACTTCTGATAGATCGGAAGAGCGGTTTCAG    |
| chr18 | 45391515  | 45391554  | SMAD2_8646 | + | GTGACCTATGCACCAGACGTTTAAAAACAAATCAAGCACAGCTGCAACATAATCTCACTACAGATCGGAAGAGCGGTTTCAG   |
| chr18 | 45394839  | 45394878  | SMAD2_8647 | + | GTGACCTATGCACCAGACGTTCAAGAAATCCAAGTTAATGGCAAAGAGCAAAGGGGAGTGAGATCGGAAGAGCGGTTTCAG    |
| chr18 | 45396946  | 45396985  | SMAD2_8648 | + | GTGACCTATGCACCAGACGTATTGAAAAACAAAAAATGATGTGAACATGGAAGCATGGTAGATCGGAAGAGCGGTTTCAG     |
| chr18 | 45423138  | 45423177  | SMAD2_8649 | + | GTGACCTATGCACCAGACGTAAAGGCACAAAGCCAGCTAGGAAAAACGCCTCTTGATCGAGATCGGAAGAGCGGTTTCAG     |
| chr15 | 67358709  | 67358748  | SMAD3_8650 | + | GTGACCTATGCACCAGACGTGCCCGGGGGGACCCGGGGTACGCGCGCCAGCCCTGAGATCGGAAGAGCGGTTTCAG         |
| chr15 | 67430449  | 67430488  | SMAD3_8651 | + | GTGACCTATGCACCAGACGTGTCGCCGGGACATGCTTTTTCTTTCTTGAAGTCTGCTCAGATCGGAAGAGCGGTTTCAG      |
| chr15 | 67457437  | 67457476  | SMAD3_8652 | + | GTGACCTATGCACCAGACGTTGGCCCTGCCTGTGGGGACAGCAGGTGCCAGGGGTATCACAGATCGGAAGAGCGGTTTCAG    |
| chr15 | 67457733  | 67457772  | SMAD3_8653 | + | GTGACCTATGCACCAGACGTGGCGGGCACAGGCTGGCCTGGGAGGCGAGGGGCAGCGGTCAAGATCGGAAGAGCGGTTTCAG   |
| chr15 | 67459202  | 67459241  | SMAD3_8654 | + | GTGACCTATGCACCAGACGTGAGGTCAGGCTGCTCTTATTCTTAAGTATTAGCAGCTGGTGAGATCGGAAGAGCGGTTTCAG   |
| chr15 | 67462953  | 67462992  | SMAD3_8655 | + | GTGACCTATGCACCAGACGTCCCTGTGCACACAACTGGAAACCCCTAGCTGCAAGCCCTAGATCGGAAGAGCGGTTTCAG     |
| chr15 | 67473802  | 67473841  | SMAD3_8656 | + | GTGACCTATGCACCAGACGTGCTCCATTCCCGCCCCCCCCACCCTGCCCTGCCACTCTAAGATCGGAAGAGCGGTTTCAG     |
| chr15 | 67477213  | 67477252  | SMAD3_8657 | + | GTGACCTATGCACCAGACGTGCGCACAGCCACCCTGCCTTGAAGTCCCTCTCCGAGTCAAGATCGGAAGAGCGGTTTCAG     |
| chr15 | 67479858  | 67479897  | SMAD3_8658 | + | GTGACCTATGCACCAGACGTGGTGTGCTGCCTACATCAGGGGACCCAACTCCAGGTGACTCTAGATCGGAAGAGCGGTTTCAG  |
| chr15 | 67482885  | 67482924  | SMAD3_8659 | + | GTGACCTATGCACCAGACGTGTTGGTAGGGGAGGGCAGGCTGGGGAAAATGGCCATGCAAGATCGGAAGAGCGGTTTCAG     |
| chr9  | 135772152 | 135772191 | TSC1_8660  | + | GTGACCTATGCACCAGACGTGCCGGGAGGAAAAAGAGCTGGTGATTGGACTGTCCACAGATCGGAAGAGCGGTTTCAG       |
| chr9  | 135772743 | 135772782 | TSC1_8661  | + | GTGACCTATGCACCAGACGTGACAGCCAGCCAGAATATAGGAAGTTCCACTTAATAAAAAACAGATCGGAAGAGCGGTTTCAG  |
| chr9  | 135773008 | 135773047 | TSC1_8662  | + | GTGACCTATGCACCAGACGTAAAAAAGACTGGAATTAGTACTTTATAAAAAATAAAAGATCGGAAGAGCGGTTTCAG        |
| chr9  | 135776235 | 135776274 | TSC1_8663  | + | GTGACCTATGCACCAGACGTAAACATGAGCAAAGTGAAAAATCCGACGACATAAACTAGCAGATCGGAAGAGCGGTTTCAG    |
| chr9  | 135777097 | 135777136 | TSC1_8664  | + | GTGACCTATGCACCAGACGTAGACGTGGACATGAAGTTTGAGGAACACCAACAGGCCAGAAGATCGGAAGAGCGGTTTCAG    |
| chr9  | 135778185 | 135778224 | TSC1_8665  | + | GTGACCTATGCACCAGACGTCCAGAAATGTCACTTTTAGCTGTCTTCCAACACAGGCAAGATCGGAAGAGCGGTTTCAG      |
| chr9  | 135779215 | 135779254 | TSC1_8666  | + | GTGACCTATGCACCAGACGTGACAGAGGGGAGGCTGGCAAGAAATGCCTTTTACAGATGGTTAGATCGGAAGAGCGGTTTCAG  |
| chr9  | 135779852 | 135779891 | TSC1_8667  | + | GTGACCTATGCACCAGACGTAGTTTTGAGTAACAAAGTTACCGATCTTACCAAGAAAAAGATCGGAAGAGCGGTTTCAG      |
| chr9  | 135781537 | 135781576 | TSC1_8668  | + | GTGACCTATGCACCAGACGTGAGAGGAAACAAAAGAAATGGCAGTCCGTTTCCACCTGGAGATCGGAAGAGCGGTTTCAG     |
| chr9  | 135782233 | 135782272 | TSC1_8669  | + | GTGACCTATGCACCAGACGTACAAGACAACCTGAAGTCAAAGAAATACAGTGTAAATCCCTAGATCGGAAGAGCGGTTTCAG   |
| chr9  | 135782768 | 135782807 | TSC1_8670  | + | GTGACCTATGCACCAGACGTAAAGTATCATTATATACAAGACGAAAAATGTTGCACATGAGATCGGAAGAGCGGTTTCAG     |
| chr9  | 135786090 | 135786129 | TSC1_8671  | + | GTGACCTATGCACCAGACGTAGGGCAGAACATATGAACACTGAGCCCACTATTAGAAGATCGGAAGAGCGGTTTCAG        |
| chr9  | 135786511 | 135786550 | TSC1_8672  | + | GTGACCTATGCACCAGACGTAAATAAAGTACATCAGCAGTGCCCAAAGGAATGCTAAGTCTATAGATCGGAAGAGCGGTTTCAG |
| chr9  | 135786966 | 135787005 | TSC1_8673  | + | GTGACCTATGCACCAGACGTAGAGAAGAACACAGGGGTTAGTGTGTGGTTTTAGGTTATAGATCGGAAGAGCGGTTTCAG     |
| chr9  | 135787855 | 135787894 | TSC1_8674  | + | GTGACCTATGCACCAGACGTCAATGAAAGTCAAGAAATGCAAACCTGTAATCAACTGAATTAGATCGGAAGAGCGGTTTCAG   |
| chr9  | 135797371 | 135797410 | TSC1_8675  | + | GTGACCTATGCACCAGACGTAAACCCGTTGAGAAGAGCCTCTTAGTTGGAGACAGATTGAGAGATCGGAAGAGCGGTTTCAG   |
| chr9  | 135798890 | 135798929 | TSC1_8676  | + | GTGACCTATGCACCAGACGTAAAGGTCAAACAGGAAACGCTCTGACGGCACTGGCACCAGAGATCGGAAGAGCGGTTTCAG    |
| chr9  | 135801137 | 135801176 | TSC1_8677  | + | GTGACCTATGCACCAGACGTAAAGAACAAGGGCAGCTCTACATGAATGTATGAAGTTAAGATCGGAAGAGCGGTTTCAG      |
| chr9  | 135802702 | 135802741 | TSC1_8678  | + | GTGACCTATGCACCAGACGTAAAAAGGCAATGGATGATACTTATCCCCTTAACATCCTAAGATCGGAAGAGCGGTTTCAG     |
| chr9  | 135804270 | 135804309 | TSC1_8679  | + | GTGACCTATGCACCAGACGTGAAGGCGCTGTGCTGGCTCCAGGACGTGTGCTACAGTTTCAGATCGGAAGAGCGGTTTCAG    |
| chr9  | 135771892 | 135771931 | TSC1_8680  | + | GTGACCTATGCACCAGACGTGGGGATGCTGGCAGACGCTTCTCCATAGTCTGCTCTCCACAGATCGGAAGAGCGGTTTCAG    |
| chr9  | 135781257 | 135781296 | TSC1_8681  | + | GTGACCTATGCACCAGACGTGTCTCCCGCAGGGCTTTCATCAGCACTGCCGACGGGCAGAGATCGGAAGAGCGGTTTCAG     |
| chr16 | 4016978   | 4017017   | ADCY9_8682 | + | GTGACCTATGCACCAGACGTAAAGACCGGAAAGGGAGAGGTTACTGCTCGGCGCTCCAAGATCGGAAGAGCGGTTTCAG      |
| chr16 | 4024722   | 4024761   | ADCY9_8683 | + | GTGACCTATGCACCAGACGTAAAGACAGAAATATTATCAAAGAGCAAAAGAGCATTAGATCGGAAGAGCGGTTTCAG        |
| chr16 | 4027642   | 4027681   | ADCY9_8684 | + | GTGACCTATGCACCAGACGTGGAAGGGTTAGGACAGCCGCCAGGGCCACCCCGCCACCCAGATCGGAAGAGCGGTTTCAG     |
| chr16 | 4029287   | 4029326   | ADCY9_8685 | + | GTGACCTATGCACCAGACGTGATGGGGTTAGCAGGACGACGGGGCCCGGGTGGGTCAAGATCGGAAGAGCGGTTTCAG       |
| chr16 | 4033452   | 4033491   | ADCY9_8686 | + | GTGACCTATGCACCAGACGTGAGGAGTGGAGCAGAATGACTGGGAGGCCATGGGCGCCAAAGATCGGAAGAGCGGTTTCAG    |
| chr16 | 4039108   | 4039147   | ADCY9_8687 | + | GTGACCTATGCACCAGACGTCAACAAATGCAGTCGATCAATACCCAGCACCATAACTGTGAGATCGGAAGAGCGGTTTCAG    |
| chr16 | 4042375   | 4042414   | ADCY9_8688 | + | GTGACCTATGCACCAGACGTACAAGAGAGACGACGACAGCAGGAAAGTGAAGTGGACGGAGATCGGAAGAGCGGTTTCAG     |
| chr16 | 4043522   | 4043561   | ADCY9_8689 | + | GTGACCTATGCACCAGACGTAAACACAGACTGTGGGGACACACCCAGAAACCAGACTGCCAGATCGGAAGAGCGGTTTCAG    |
| chr16 | 4057570   | 4057609   | ADCY9_8690 | + | GTGACCTATGCACCAGACGTTAAAAGTTACAGTCAGCACAGATTGAAAGCACCGTCTGTTAGATCGGAAGAGCGGTTTCAG    |
| chr16 | 4165454   | 4165493   | ADCY9_8691 | + | GTGACCTATGCACCAGACGTCCCGGGCCCTGCCCGGGCCGGGTACCAGTACCTGCCAGAGATCGGAAGAGCGGTTTCAG      |
| chr16 | 4016183   | 4016222   | ADCY9_8692 | + | GTGACCTATGCACCAGACGTTCTTGCTCAAGACGCGGTAGTCTCTTCCGCTCACCTGGATAGATCGGAAGAGCGGTTTCAG    |
| chr16 | 4016580   | 4016619   | ADCY9_8693 | + | GTGACCTATGCACCAGACGTGTTGAGGACCCGGTAGCACTCTTGGCGCCCTCGTAGTTCCAGATCGGAAGAGCGGTTTCAG    |
| chr16 | 4164184   | 4164223   | ADCY9_8694 | + | GTGACCTATGCACCAGACGTGTTGAGGACCCACAGGGCCGTGGCAGACTTGTGGCAAGATCGGAAGAGCGGTTTCAG        |
| chr16 | 4164607   | 4164646   | ADCY9_8695 | + | GTGACCTATGCACCAGACGTCCAGTGCAGGGCCCCGGCTCCGGCGAGGGGAAGCAGGCTAGATCGGAAGAGCGGTTTCAG     |
| chr16 | 4165030   | 4165069   | ADCY9_8696 | + | GTGACCTATGCACCAGACGTGATGAGCCGCAAAATAGATGCTCCACAGAAGGCAGGCGAGATCGGAAGAGCGGTTTCAG      |
| chr12 | 58120588  | 58120627  | AGAP2_8697 | + | GTGACCTATGCACCAGACGTGAAACGCGCCGCTGACCGCGCTCCACAGGGCCGCCACACAGATCGGAAGAGCGGTTTCAG     |
| chr12 | 58121023  | 58121062  | AGAP2_8698 | + | GTGACCTATGCACCAGACGTAGGGATCAACGGAAAAGGCTCAGGGACCCCCAGCCAGGAAGATCGGAAGAGCGGTTTCAG     |
| chr12 | 58121376  | 58121415  | AGAP2_8699 | + | GTGACCTATGCACCAGACGTAGAGGTGCGGCTCCGAGCCGGCAGCAGCAGCCACCCAGATCGGAAGAGCGGTTTCAG        |
| chr12 | 58121565  | 58121604  | AGAP2_8700 | + | GTGACCTATGCACCAGACGTGGTTTTGGTTGGCACTGACTCTGCCTCACAAGCCCACTCAGATCGGAAGAGCGGTTTCAG     |

|       |          |          |             |   |                                                                                    |
|-------|----------|----------|-------------|---|------------------------------------------------------------------------------------|
| chr12 | 58121879 | 58121918 | AGAP2_8701  | + | GTGACCTATGCACCAGACGTGATGGGATGGGGTCATTAAGGGACAGAGTTCAAGCAGGGGAGATCGGAAGAGCGGTTTCAG  |
| chr12 | 58123561 | 58123600 | AGAP2_8702  | + | GTGACCTATGCACCAGACGTAAGACACAGCTGCCTCAGTAGCCCCCTCCACAGATTTCCCTAGATCGGAAGAGCGGTTTCAG |
| chr12 | 58124408 | 58124447 | AGAP2_8703  | + | GTGACCTATGCACCAGACGTAAGATGAAACCTCAGTGAGCCTCTTTCTTCTGGCCCCATTAGATCGGAAGAGCGGTTTCAG  |
| chr12 | 58124747 | 58124786 | AGAP2_8704  | + | GTGACCTATGCACCAGACGTACAGGGCCGAGAGTGTAGGGAAGGTTGGGGTCCTTGGTATAGATCGGAAGAGCGGTTTCAG  |
| chr12 | 58125264 | 58125303 | AGAP2_8705  | + | GTGACCTATGCACCAGACGTGGGAAAGACACATGTGGGAAAAAAGCCAACCTAAGACCAGCAGATCGGAAGAGCGGTTTCAG |
| chr12 | 58125436 | 58125475 | AGAP2_8706  | + | GTGACCTATGCACCAGACGTTATTGGAATCAGTTTGAGGATGGATAGAGGGGATACACTGAAGATCGGAAGAGCGGTTTCAG |
| chr12 | 58125761 | 58125800 | AGAP2_8707  | + | GTGACCTATGCACCAGACGTATGGAAGAGTCAGCCAGGATGAGATGCCCCCTACTCCACCAGATCGGAAGAGCGGTTTCAG  |
| chr12 | 58126306 | 58126345 | AGAP2_8708  | + | GTGACCTATGCACCAGACGTTTACCGAAAGGAGGTGTGAGCAGGCCAGATACCCAAGACCAGATCGGAAGAGCGGTTTCAG  |
| chr12 | 58126773 | 58126812 | AGAP2_8709  | + | GTGACCTATGCACCAGACGTAGGAAAGGGGCAGGATTGAACAAGGAGCCCCACCTTGTTTCAGATCGGAAGAGCGGTTTCAG |
| chr12 | 58127967 | 58128006 | AGAP2_8710  | + | GTGACCTATGCACCAGACGTGTGAGGGGAGCAAATGAAAGTCAGACAGGTCTACTCCTCTAGATCGGAAGAGCGGTTTCAG  |
| chr12 | 58128198 | 58128237 | AGAP2_8711  | + | GTGACCTATGCACCAGACGTGAGTTGGAAGGGGTAACAGGTCAGAGGTGACAGGTCACCAAGATCGGAAGAGCGGTTTCAG  |
| chr12 | 58128473 | 58128512 | AGAP2_8712  | + | GTGACCTATGCACCAGACGTGGTTGTGGAGCAGAATTTGGGGATATAAGAAAGGCAGGAGATCGGAAGAGCGGTTTCAG    |
| chr12 | 58129221 | 58129260 | AGAP2_8713  | + | GTGACCTATGCACCAGACGTAGAAGGGCAGTAAGAGGGGAGGTCCTGGCTCAGAAGGACAGATCGGAAGAGCGGTTTCAG   |
| chr12 | 58132040 | 58132079 | AGAP2_8714  | + | GTGACCTATGCACCAGACGTGACCCCCGAGCTGGGGAGGGGAGGGGACTCCCCCGGACTGAGATCGGAAGAGCGGTTTCAG  |
| chr12 | 58135865 | 58135904 | AGAP2_8715  | + | GTGACCTATGCACCAGACGTCTGTCTTGGCAGGCTAACACCACCTCTGGCCCTGAGGCAGATCGGAAGAGCGGTTTCAG    |
| chr12 | 58131650 | 58131689 | AGAP2_8716  | + | GTGACCTATGCACCAGACGTAGTCCCCGGAGAGCGGGGTCGCCGGAGGGACGGCCAGAAGATCGGAAGAGCGGTTTCAG    |
| chr19 | 49458867 | 49458906 | BAX_8717    | + | GTGACCTATGCACCAGACGTGGTCTGATTATTGTGGCACAGATTTGAGGAGTGACACCCAGATCGGAAGAGCGGTTTCAG   |
| chr19 | 49459101 | 49459140 | BAX_8718    | + | GTGACCTATGCACCAGACGTCTGAGGACCAGACAGTCCAGCCACTGGCTCCTTCCAGACAGATCGGAAGAGCGGTTTCAG   |
| chr19 | 49459601 | 49459640 | BAX_8719    | + | GTGACCTATGCACCAGACGTGCAGGGCAGTGAGCCCAGGGATGCTCCCCCTCAGATCTGTAGATCGGAAGAGCGGTTTCAG  |
| chr19 | 49464105 | 49464144 | BAX_8720    | + | GTGACCTATGCACCAGACGTGATGGGCTGGACATTGGACTTCTCCGGGAGCGGCTGTTGAGATCGGAAGAGCGGTTTCAG   |
| chr19 | 49464365 | 49464404 | BAX_8721    | + | GTGACCTATGCACCAGACGTATTATCATCTACCTGCTGACCTCCCAGTGACCCCTGACCTCAGATCGGAAGAGCGGTTTCAG |
| chr19 | 49464904 | 49464943 | BAX_8722    | + | GTGACCTATGCACCAGACGTTGCCTTGGACTGTGTTTTTCTCCATAAATTTATGGCATTAGATCGGAAGAGCGGTTTCAG   |
| chr2  | 60679812 | 60679851 | BCL11A_8723 | + | GTGACCTATGCACCAGACGTGTTGGAGACAGGAGGGGAAAAAAGTACAGGTTGAGATCGGAAGAGCGGTTTCAG         |
| chr2  | 60689570 | 60689609 | BCL11A_8724 | + | GTGACCTATGCACCAGACGTATACAAACCAACATCAATGTTTAACTAGGCGGGCAAGATCGGAAGAGCGGTTTCAG       |
| chr2  | 60695979 | 60696018 | BCL11A_8725 | + | GTGACCTATGCACCAGACGTAAACCCAAATCAAGCACTACAGCTACAACAACAGTGCATCAGATCGGAAGAGCGGTTTCAG  |
| chr2  | 60773446 | 60773485 | BCL11A_8726 | + | GTGACCTATGCACCAGACGTAGAAACAAAAGCACAATTTAGAGTGCCAGAGAGGACAGAGATCGGAAGAGCGGTTTCAG    |
| chr2  | 60688263 | 60688302 | BCL11A_8727 | + | GTGACCTATGCACCAGACGTTCCGACTCGCCGGCCACCGAGTCTTCTCGCAAGTGTCCAGATCGGAAGAGCGGTTTCAG    |
| chr2  | 60688699 | 60688738 | BCL11A_8728 | + | GTGACCTATGCACCAGACGTGTTCCGGGGAGCTCGGGGTTGGAGAGCCGTCGTCGGACTTAGATCGGAAGAGCGGTTTCAG  |
| chr2  | 60689135 | 60689174 | BCL11A_8729 | + | GTGACCTATGCACCAGACGTATTCAACCGCAGCACCCTGTCAAAGGCACTCGGTTGAGATCGGAAGAGCGGTTTCAG      |
| chr2  | 60687953 | 60687992 | BCL11A_8730 | + | GTGACCTATGCACCAGACGTGCGCAAACTCCCGTTCTCCGAGAGTGTCTCCGACGAGGAGATCGGAAGAGCGGTTTCAG    |
| chr2  | 60688357 | 60688396 | BCL11A_8731 | + | GTGACCTATGCACCAGACGTGGTGGAAAGGCCCTCGCTGAAGTGTGCATGGAGCTGAGCACAGATCGGAAGAGCGGTTTCAG |
| chr2  | 60688761 | 60688800 | BCL11A_8732 | + | GTGACCTATGCACCAGACGTTGCATGTGGCTTCTCATGTGGCGTTCAGCTTGTGGCTAGATCGGAAGAGCGGTTTCAG     |
| chr2  | 60689165 | 60689204 | BCL11A_8733 | + | GTGACCTATGCACCAGACGTGGGGTATGGGTGGCCAGGGCCATCTCTCCGCCCCAGGAGATCGGAAGAGCGGTTTCAG     |
| chr22 | 23524437 | 23524476 | BCR_8734    | + | GTGACCTATGCACCAGACGTGACGCCACGTGCGTGGGCACACCTGCACGGGGGAGGAAAAAGATCGGAAGAGCGGTTTCAG  |
| chr22 | 23596178 | 23596217 | BCR_8735    | + | GTGACCTATGCACCAGACGTATGGTGTACGTGTGGCAGAGGGCCAGGTGAGGCTCCCTGAGATCGGAAGAGCGGTTTCAG   |
| chr22 | 23603252 | 23603291 | BCR_8736    | + | GTGACCTATGCACCAGACGTTTTAGGGAGCTGAGCAGGGCGGGATGGGCAGGGTGACAGAGATCGGAAGAGCGGTTTCAG   |
| chr22 | 23610713 | 23610752 | BCR_8737    | + | GTGACCTATGCACCAGACGTGATGCCGTTTCAGACAGGTGCACCGCTGACTCCCACCTGTAAGATCGGAAGAGCGGTTTCAG |
| chr22 | 23613790 | 23613829 | BCR_8738    | + | GTGACCTATGCACCAGACGTCATGCTGAGGTCTCTGTGTGCCCTCGTCAGGGAGGCTGCTAGATCGGAAGAGCGGTTTCAG  |
| chr22 | 23615972 | 23616011 | BCR_8739    | + | GTGACCTATGCACCAGACGTCAGGGGATGGCTTGGGTCCACCCATCCTGCTGAGCTGGGGAGATCGGAAGAGCGGTTTCAG  |
| chr22 | 23626296 | 23626335 | BCR_8740    | + | GTGACCTATGCACCAGACGTATGTGCCCTTGCCAGCAGTGACCCACCCTGACTCTCAGATCGGAAGAGCGGTTTCAG      |
| chr22 | 23627399 | 23627438 | BCR_8741    | + | GTGACCTATGCACCAGACGTGGGGAAAGCGGGGTTGGTGTGGTGCAGAGTGCAGGCAGATCGGAAGAGCGGTTTCAG      |
| chr22 | 23629476 | 23629515 | BCR_8742    | + | GTGACCTATGCACCAGACGTGCTGTTCCGGCCCTCCTGCTCCTGGCCTGGGATGGGCAGATCGGAAGAGCGGTTTCAG     |
| chr22 | 23630370 | 23630409 | BCR_8743    | + | GTGACCTATGCACCAGACGTTCTGTCCTGAGAGGGCTGGGCTTCAAACCATTAGGGCCAAGATCGGAAGAGCGGTTTCAG   |
| chr22 | 23631819 | 23631858 | BCR_8744    | + | GTGACCTATGCACCAGACGTCCGTTTTCCGTGTACAGGGCACCTGCAGGGAGGGCAGGCAGAGATCGGAAGAGCGGTTTCAG |
| chr22 | 23632611 | 23632650 | BCR_8745    | + | GTGACCTATGCACCAGACGTGTTTTGGGGAGGAGGGTTGCAGCGGCCGAGCCAGGGTCTCCAGATCGGAAGAGCGGTTTCAG |
| chr22 | 23634836 | 23634875 | BCR_8746    | + | GTGACCTATGCACCAGACGTGATTTCCAGAGGGCCAGCCTGCCAGGTGGGGCAGCAGGATAGATCGGAAGAGCGGTTTCAG  |
| chr22 | 23637353 | 23637392 | BCR_8747    | + | GTGACCTATGCACCAGACGTCATCCCTACCCCTCCCTGCCCGATGCATGGCGTCTTTTTAGATCGGAAGAGCGGTTTCAG   |
| chr22 | 23651681 | 23651720 | BCR_8748    | + | GTGACCTATGCACCAGACGTGTTGGACTCTCTGGTGCCCACTTCCCCAGAAGGATAGGAGATCGGAAGAGCGGTTTCAG    |
| chr22 | 23652631 | 23652670 | BCR_8749    | + | GTGACCTATGCACCAGACGTAGGGGCTTGGGCTCAGCAGTGCAGGCTGCTGCTCCCTCAAGATCGGAAGAGCGGTTTCAG   |
| chr22 | 23654034 | 23654073 | BCR_8750    | + | GTGACCTATGCACCAGACGTGCTGCGCAGGACGGGATGGAGGTGTGGGCAATGGTGTCCAGATCGGAAGAGCGGTTTCAG   |
| chr22 | 23655219 | 23655258 | BCR_8751    | + | GTGACCTATGCACCAGACGTGAGCCCTTGGCCTCATGGAGAGCTCTCCTCCAGTGCACAGATCGGAAGAGCGGTTTCAG    |
| chr22 | 23656271 | 23656310 | BCR_8752    | + | GTGACCTATGCACCAGACGTTCTCCATGGCAGCCATGGGAGCTCCAGGTCGCCAGGCCGCAAGATCGGAAGAGCGGTTTCAG |
| chr22 | 23656912 | 23656951 | BCR_8753    | + | GTGACCTATGCACCAGACGTACAGGCTCCAGCCATGCAACCTGACCTGACAGAGGTGGAGATCGGAAGAGCGGTTTCAG    |
| chr22 | 23657720 | 23657759 | BCR_8754    | + | GTGACCTATGCACCAGACGTCCATCTCCTGGAGGCGGACAGATGGCCTGGAACCTCTGGAGATCGGAAGAGCGGTTTCAG   |
| chr22 | 23523584 | 23523623 | BCR_8755    | + | GTGACCTATGCACCAGACGTGACCCCCGCCAGCGTGCGCGCGCTCAGGTCCAACCTCGAAGATCGGAAGAGCGGTTTCAG   |
| chr22 | 23524010 | 23524049 | BCR_8756    | + | GTGACCTATGCACCAGACGTTGGAAGGGGAGGGCAAGGGCCCGCTCCTGCGCAGCAGAGAGATCGGAAGAGCGGTTTCAG   |
| chr17 | 76210519 | 76210558 | BIRC5_8757  | + | GTGACCTATGCACCAGACGTCCGGCTCCTGGGCTCCCCAGCCGCTTGGCTTGCCTGATCGGAAGAGCGGTTTCAG        |
| chr17 | 76210881 | 76210920 | BIRC5_8758  | + | GTGACCTATGCACCAGACGTTCTGGCCAGCCTCGATGGGCTTGTTTTTGAAGTGTGATCGGAAGAGCGGTTTCAG        |

|       |           |           |            |   |                                                                                       |
|-------|-----------|-----------|------------|---|---------------------------------------------------------------------------------------|
| chr17 | 76212873  | 76212912  | BIRC5_8759 | + | GTGACCTATGCACCAGACGTGGAATAAGAACTGCTCAAACCCTGTTCATGTCTTTAGCAAGATCGGAAGAGCGGTTTCAG      |
| chr17 | 76219646  | 76219685  | BIRC5_8760 | + | GTGACCTATGCACCAGACGTGCGGAGCTGCCTGGTCCAGAGTGGCTGCACCACTTCCAGGAGATCGGAAGAGCGGTTTCAG     |
| chr17 | 76219749  | 76219788  | BIRC5_8761 | + | GTGACCTATGCACCAGACGTCAACATTTTCAAATTAGATGTTTCAACTGTGCTCTTGTTTAGATCGGAAGAGCGGTTTCAG     |
| chr7  | 116165157 | 116165196 | CAV1_8762  | + | GTGACCTATGCACCAGACGTGTGGGGGGGCGCCGGCTCGGGCGTGCGGGGAGTGTCCGCTAGATCGGAAGAGCGGTTTCAG     |
| chr7  | 116166754 | 116166793 | CAV1_8763  | + | GTGACCTATGCACCAGACGTGCGACCAACAGGGAAGGGCTGGGACAGCTCTCCTCTGGCAAGATCGGAAGAGCGGTTTCAG     |
| chr7  | 116199352 | 116199391 | CAV1_8764  | + | GTGACCTATGCACCAGACGTAAGGATAGAAGTATACCTGATTTTTTCTTTTAAATTTAGATCGGAAGAGCGGTTTCAG        |
| chr19 | 30303694  | 30303733  | CCNE1_8765 | + | GTGACCTATGCACCAGACGTGAAGAGACAGGTTGGGAGCATCCCCCCTCACCTGGGAGATCGGAAGAGCGGTTTCAG         |
| chr19 | 30303955  | 30303994  | CCNE1_8766 | + | GTGACCTATGCACCAGACGTCCGGGGTGGGCTCTGTGGAGGTCTTCTCCCCCTGGGTAGATCGGAAGAGCGGTTTCAG        |
| chr19 | 30308200  | 30308239  | CCNE1_8767 | + | GTGACCTATGCACCAGACGTACTCTGCCACATGGCTTCCAGGTCTTACTCCATGCTCCAGATCGGAAGAGCGGTTTCAG       |
| chr19 | 30308459  | 30308498  | CCNE1_8768 | + | GTGACCTATGCACCAGACGTGTCTTCCTGTTCGCTTCATGAAAGCACTGAGCATTTCCAGAGATCGGAAGAGCGGTTTCAG     |
| chr19 | 30311766  | 30311805  | CCNE1_8769 | + | GTGACCTATGCACCAGACGTTTCAAATATTTGTTCTATAATGTGTGTTATTTCTCGAGCTAGATCGGAAGAGCGGTTTCAG     |
| chr19 | 30312735  | 30312774  | CCNE1_8770 | + | GTGACCTATGCACCAGACGTGTGAATTTTCCGGCCATTTTTAAATCGGTACGGCAGATCAGATCGGAAGAGCGGTTTCAG      |
| chr19 | 30313048  | 30313087  | CCNE1_8771 | + | GTGACCTATGCACCAGACGTCCATCACGTCCGCTGGGGCCACTTCCCTGCAGCTGGAGTGAGATCGGAAGAGCGGTTTCAG     |
| chr19 | 30313269  | 30313308  | CCNE1_8772 | + | GTGACCTATGCACCAGACGTTTTCCAGTGCATGCACAAAAGGTGTACTAAGCTTACATAGATCGGAAGAGCGGTTTCAG       |
| chr19 | 30313521  | 30313560  | CCNE1_8773 | + | GTGACCTATGCACCAGACGTCTCCTTCTTTCAGTCTTCTTGCCAAATTTTAAACTGAGATCGGAAGAGCGGTTTCAG         |
| chr19 | 30314695  | 30314734  | CCNE1_8774 | + | GTGACCTATGCACCAGACGTCTTCTCCACAAAGACAGTTGCGCGCCTGCTCCACGTTCTAGATCGGAAGAGCGGTTTCAG      |
| chr7  | 14216535  | 14216574  | DGKB_8775  | + | GTGACCTATGCACCAGACGTATATTTTCATTGTTAAGTATTGCAAGGAAATCTTTATATTAAGATCGGAAGAGCGGTTTCAG    |
| chr7  | 14217787  | 14217826  | DGKB_8776  | + | GTGACCTATGCACCAGACGTGATAGTGCCTTAAAGTTCAGATGTATACATATGTCCAAGATCGGAAGAGCGGTTTCAG        |
| chr7  | 14378346  | 14378385  | DGKB_8777  | + | GTGACCTATGCACCAGACGTAAAAGAAAGAAACAGAAACGGAATATTTTATCTTTATTTTCAGATCGGAAGAGCGGTTTCAG    |
| chr7  | 14385027  | 14385066  | DGKB_8778  | + | GTGACCTATGCACCAGACGTAAAGGAAGAAGCACCTTAGGCAATATCAATAACAGAGGGAGATCGGAAGAGCGGTTTCAG      |
| chr7  | 14517861  | 14517900  | DGKB_8779  | + | GTGACCTATGCACCAGACGTAAAATAGAAAACAAAACAGGATGTTTATGATCCTATTAAGATCGGAAGAGCGGTTTCAG       |
| chr7  | 14614008  | 14614047  | DGKB_8780  | + | GTGACCTATGCACCAGACGTAAAAAATACCTTGAGAAAAGAACTCTAACAAAATAAAAAAGATCGGAAGAGCGGTTTCAG      |
| chr7  | 14620587  | 14620626  | DGKB_8781  | + | GTGACCTATGCACCAGACGTAAAAAATAACAATAAAGAAAATTTAAGTTTCAGATAAAGATCGGAAGAGCGGTTTCAG        |
| chr7  | 14622773  | 14622812  | DGKB_8782  | + | GTGACCTATGCACCAGACGTAGCATGTTATGCGACATGTAATAGTTTAAAAATAAGATAGATCGGAAGAGCGGTTTCAG       |
| chr7  | 14653049  | 14653088  | DGKB_8783  | + | GTGACCTATGCACCAGACGTAGTTATATACATGAAAAAATTATTAGGCCATTATATATGAGATCGGAAGAGCGGTTTCAG      |
| chr7  | 14661130  | 14661169  | DGKB_8784  | + | GTGACCTATGCACCAGACGTGAAAATTTTGATAAAAATAAAAATTAGGAAAATAACATAAAGATCGGAAGAGCGGTTTCAG     |
| chr7  | 14669907  | 14669946  | DGKB_8785  | + | GTGACCTATGCACCAGACGTGAAGTTTCATATGAAAGCTGAAAAAGAGTCAAACCTCAAACAGATCGGAAGAGCGGTTTCAG    |
| chr7  | 14712663  | 14712702  | DGKB_8786  | + | GTGACCTATGCACCAGACGTAGAAAAGGGGATAGTATCAAATTTCTACATGACAACGCCTAAGATCGGAAGAGCGGTTTCAG    |
| chr7  | 14722305  | 14722344  | DGKB_8787  | + | GTGACCTATGCACCAGACGTATGACAACATTTGATAAGAGGACACACTACATAATGCCAGATCGGAAGAGCGGTTTCAG       |
| chr7  | 14722477  | 14722516  | DGKB_8788  | + | GTGACCTATGCACCAGACGTACAGGTACACAATACTCAGAGCTAATCCTGGTCTGGTTGATAGATCGGAAGAGCGGTTTCAG    |
| chr7  | 14724998  | 14725037  | DGKB_8789  | + | GTGACCTATGCACCAGACGTGTAAGAGAACAGATTTCACTTAATGAAATAAACAGTGAAGATCGGAAGAGCGGTTTCAG       |
| chr7  | 14733830  | 14733869  | DGKB_8790  | + | GTGACCTATGCACCAGACGTGGAGATAAGGGAAAATGGTGGTCAACCAATAAAATAAATAGATCGGAAGAGCGGTTTCAG      |
| chr7  | 14737805  | 14737844  | DGKB_8791  | + | GTGACCTATGCACCAGACGTAAAGAGAGATAAAAAATAGATCAAGATCTTAGTGAGTTAGATCGGAAGAGCGGTTTCAG       |
| chr7  | 14741366  | 14741405  | DGKB_8792  | + | GTGACCTATGCACCAGACGTAGAGGTGTTGAAAAAAGATTATAGGCCAAATAAGATCAATAGATCGGAAGAGCGGTTTCAG     |
| chr7  | 14758321  | 14758360  | DGKB_8793  | + | GTGACCTATGCACCAGACGTAAATGCTTATATTTTTGTTAATTTTACAGTGATCTCAAGATCGGAAGAGCGGTTTCAG        |
| chr7  | 14775830  | 14775869  | DGKB_8794  | + | GTGACCTATGCACCAGACGTAAAATGTAACATGTATTTAAGATCCAACCAAATGTTAAAGATCGGAAGAGCGGTTTCAG       |
| chr7  | 14793584  | 14793623  | DGKB_8795  | + | GTGACCTATGCACCAGACGTAAAGAAAGAAAGAAATACATGTGTTAATGTAAGATACTTTAAGATCGGAAGAGCGGTTTCAG    |
| chr7  | 14797367  | 14797406  | DGKB_8796  | + | GTGACCTATGCACCAGACGTACAGAAAACAAAAAATGTTTTATATGCACATACTGTGGTTAGATCGGAAGAGCGGTTTCAG     |
| chr7  | 14880899  | 14880938  | DGKB_8797  | + | GTGACCTATGCACCAGACGTAGAAGCTCTGTACATAACCAGGTAAGAAATCTTTTATTCAAGATCGGAAGAGCGGTTTCAG     |
| chr7  | 100401223 | 100401262 | EPHB4_8798 | + | GTGACCTATGCACCAGACGTAAAGGAGAGCTTGGTGACACCCTAGGTTCCCTGTGGCCGAGATCGGAAGAGCGGTTTCAG      |
| chr7  | 100402954 | 100402993 | EPHB4_8799 | + | GTGACCTATGCACCAGACGTAAAGGATGGGGAGAAATGCTGATACCAGGCCAGTCCAGTCCGGGAGATCGGAAGAGCGGTTTCAG |
| chr7  | 100403327 | 100403366 | EPHB4_8800 | + | GTGACCTATGCACCAGACGTGGGAAGAAGCTCTGGGTGAGGCTGTCCAGGAAAAGCAAAGAGATCGGAAGAGCGGTTTCAG     |
| chr7  | 100404202 | 100404241 | EPHB4_8801 | + | GTGACCTATGCACCAGACGTAGGAGAAAAGGTGAGCTGGGGGACTCACTGAGGACTCACAGATCGGAAGAGCGGTTTCAG      |
| chr7  | 100405213 | 100405252 | EPHB4_8802 | + | GTGACCTATGCACCAGACGTGATAGGGTGGGGGCTTGGTGAGGACAGCCCACCACCCTTAGATCGGAAGAGCGGTTTCAG      |
| chr7  | 100410627 | 100410666 | EPHB4_8803 | + | GTGACCTATGCACCAGACGTGGACCGCAGGCTCATCAGCTCTCCCCTCCAGTGTGGCCAGATCGGAAGAGCGGTTTCAG       |
| chr7  | 100410841 | 100410880 | EPHB4_8804 | + | GTGACCTATGCACCAGACGTAGGCAGGGCCCGTTCAGCTGGGAATTAACCTCCACTGGACAGATCGGAAGAGCGGTTTCAG     |
| chr7  | 100411349 | 100411388 | EPHB4_8805 | + | GTGACCTATGCACCAGACGTTGGGAAAGGAACAAAAGGTAAACTGAGTCACACATCTTTAAGATCGGAAGAGCGGTTTCAG     |
| chr7  | 100411654 | 100411693 | EPHB4_8806 | + | GTGACCTATGCACCAGACGTAAAGGCTGCTGATCAGGAGAAACTGATGGTCTGTAGGAGAGATCGGAAGAGCGGTTTCAG      |
| chr7  | 100414990 | 100415029 | EPHB4_8807 | + | GTGACCTATGCACCAGACGTGAGGTAGTGGGGTGGCGTCCACCAGGAAACCAAGTTCCCTAGATCGGAAGAGCGGTTTCAG     |
| chr7  | 100416277 | 100416316 | EPHB4_8808 | + | GTGACCTATGCACCAGACGTACAGACACAGGGAACCCCTGTGCATGGTAGCTCTGTCCCAGATCGGAAGAGCGGTTTCAG      |
| chr7  | 100417522 | 100417561 | EPHB4_8809 | + | GTGACCTATGCACCAGACGTCCAGGAGTCCAGGAGGCCAGCTGCTCGCGTGGTGAGATCGGAAGAGCGGTTTCAG           |
| chr7  | 100417929 | 100417968 | EPHB4_8810 | + | GTGACCTATGCACCAGACGTAAAGCAATTCATCAAAAAGCATGCACAAAACATCCATCTGAGATCGGAAGAGCGGTTTCAG     |
| chr7  | 100420300 | 100420339 | EPHB4_8811 | + | GTGACCTATGCACCAGACGTGGGGGAGGCACACCGCTGCTGTCCCCTCCCTGAGGACCAGATCGGAAGAGCGGTTTCAG       |
| chr7  | 100421564 | 100421603 | EPHB4_8812 | + | GTGACCTATGCACCAGACGTAAAGAGTTCAGCAAGGGGCTGGGGAGCCGCCAGGGAGAGAGATCGGAAGAGCGGTTTCAG      |
| chr7  | 100421906 | 100421945 | EPHB4_8813 | + | GTGACCTATGCACCAGACGTACAGAGACAGAGTCACTGGCTGGGGTGGGGAGGGAGGTAGATCGGAAGAGCGGTTTCAG       |
| chr7  | 100424663 | 100424702 | EPHB4_8814 | + | GTGACCTATGCACCAGACGTCACTCGGCTAGGATCCGAATGAGTTTGGGGGGCCCTCGCAGATCGGAAGAGCGGTTTCAG      |
| chr10 | 50667291  | 50667330  | ERCC6_8815 | + | GTGACCTATGCACCAGACGTAAAGCCTATACTGATATTTAATTTTCTAGTTTTATGCCAGATCGGAAGAGCGGTTTCAG       |
| chr10 | 50668508  | 50668547  | ERCC6_8816 | + | GTGACCTATGCACCAGACGTAAAAGCATCACAGTAGATTAATGTTTCTTTTTGAGACTTAGATCGGAAGAGCGGTTTCAG      |



|       |           |           |            |   |                                                                                      |
|-------|-----------|-----------|------------|---|--------------------------------------------------------------------------------------|
| chr10 | 50669613  | 50669652  | ERCC6_8817 | + | GTGACCTATGCACCAGACGTAAGAAATAGCAAAGTGATATTTCTACTCTGTATGCAAGAAAAGATCGGAAGAGCGGTTTCAG   |
| chr10 | 50678946  | 50678985  | ERCC6_8818 | + | GTGACCTATGCACCAGACGTAAGAAACACCCTAATACTATATTGTATCATCTTTGTCAAAGATCGGAAGAGCGGTTTCAG     |
| chr10 | 50679177  | 50679216  | ERCC6_8819 | + | GTGACCTATGCACCAGACGTAAGAAAGATAAGCTGGTATAAAAACAATGTGTAGCTCTACCTAAGATCGGAAGAGCGGTTTCAG |
| chr10 | 50680527  | 50680566  | ERCC6_8820 | + | GTGACCTATGCACCAGACGTTGAGAGAGACCTCTCAACGAGAATCCTTCCAATGACAAGATCGGAAGAGCGGTTTCAG       |
| chr10 | 50681085  | 50681124  | ERCC6_8821 | + | GTGACCTATGCACCAGACGTTGACACACAACACTGAGCACACACACTTAAGACCAGTTACAAGATCGGAAGAGCGGTTTCAG   |
| chr10 | 50681644  | 50681683  | ERCC6_8822 | + | GTGACCTATGCACCAGACGTTGGGGGATAGGAGTTTGCAAAGCAATAACACATTCCAGAGATCGGAAGAGCGGTTTCAG      |
| chr10 | 50682299  | 50682338  | ERCC6_8823 | + | GTGACCTATGCACCAGACGTTAAAGAGTACACTGTACACTGACCCATGACCCCATGTAAGATCGGAAGAGCGGTTTCAG      |
| chr10 | 50684367  | 50684406  | ERCC6_8824 | + | GTGACCTATGCACCAGACGTTGAAAAACAAGGAACTATAATTTCAAAAAAAAATTAACAAGATCGGAAGAGCGGTTTCAG     |
| chr10 | 50686527  | 50686566  | ERCC6_8825 | + | GTGACCTATGCACCAGACGTAGCAGAGAAGGGAACATTACTATATATGTTAAGGAACGCAGATCGGAAGAGCGGTTTCAG     |
| chr10 | 50690920  | 50690959  | ERCC6_8826 | + | GTGACCTATGCACCAGACGTTAAAGGAAGCACCTTTTTATTAAATTTACCTTTTAGCAATCAGATCGGAAGAGCGGTTTCAG   |
| chr10 | 50691573  | 50691612  | ERCC6_8827 | + | GTGACCTATGCACCAGACGTAATAAAATGGTAAAGTCAGTTTTAAATAAGAAGTGACACCAGATCGGAAGAGCGGTTTCAG    |
| chr10 | 50701309  | 50701348  | ERCC6_8828 | + | GTGACCTATGCACCAGACGTACGTCCAAGAAGAAAACAACCATGAAAGAGCATATACAGTAGATCGGAAGAGCGGTTTCAG    |
| chr10 | 50708753  | 50708792  | ERCC6_8829 | + | GTGACCTATGCACCAGACGTTAAACACCAACAAGAAAAGAGAAAATGGCAAATGGTGGATAAGATCGGAAGAGCGGTTTCAG   |
| chr10 | 50714069  | 50714108  | ERCC6_8830 | + | GTGACCTATGCACCAGACGTAATAAAAAATCACATTTCCATTATTTTGATCACAAGACAGAAGATCGGAAGAGCGGTTTCAG   |
| chr10 | 50732834  | 50732873  | ERCC6_8831 | + | GTGACCTATGCACCAGACGTAATAGCAATGCGTTTTCGACTAGCATGAAACTTTCCGAGGAGATCGGAAGAGCGGTTTCAG    |
| chr10 | 50736582  | 50736621  | ERCC6_8832 | + | GTGACCTATGCACCAGACGTTAAATATAGAAGACAGAAAACAGCAATGAAGTGATTATTGAGATCGGAAGAGCGGTTTCAG    |
| chr10 | 50738896  | 50738936  | ERCC6_8833 | + | GTGACCTATGCACCAGACGTAGATAAATTTGCTATTTTGCACCTGTATAACATTTTTATAAGATCGGAAGAGCGGTTTCAG    |
| chr10 | 50741021  | 50741060  | ERCC6_8834 | + | GTGACCTATGCACCAGACGTTACTTAAAGAAAATAATAAGCCTTTTCGTTATAAGATCGGAAGAGCGGTTTCAG           |
| chr10 | 50678592  | 50678631  | ERCC6_8835 | + | GTGACCTATGCACCAGACGTAGTTTTGCCTGTTCTGAAGAATTTGAACATTTCCCATTTAGATCGGAAGAGCGGTTTCAG     |
| chr10 | 50732461  | 50732500  | ERCC6_8836 | + | GTGACCTATGCACCAGACGTCCCTCTTCTGGAGTTTCTTGATGTGCTTTTTCAAACGCTCAGATCGGAAGAGCGGTTTCAG    |
| chr6  | 152163933 | 152163972 | ESR1_8837  | + | GTGACCTATGCACCAGACGTTGTTGAAAACGACTTCTATTTTTGATCCTATGAGCAGATCCAGATCGGAAGAGCGGTTTCAG   |
| chr6  | 152201917 | 152201956 | ESR1_8838  | + | GTGACCTATGCACCAGACGTTCTCTCCAGGGGCCCTTGGGGATGGCCCTGGCCACCGCCAGATCGGAAGAGCGGTTTCAG     |
| chr6  | 152265654 | 152265693 | ESR1_8839  | + | GTGACCTATGCACCAGACGTTAAGCGCAGCTTTTAAAGAGTCAATAGCTTTTCAAGAATTTAGATCGGAAGAGCGGTTTCAG   |
| chr6  | 152332940 | 152332979 | ESR1_8840  | + | GTGACCTATGCACCAGACGTTAGGCTGTAGCTTAAAGAGTAGCATGTTCTTTACGATCATAGAGATCGGAAGAGCGGTTTCAG  |
| chr6  | 152382270 | 152382309 | ESR1_8841  | + | GTGACCTATGCACCAGACGTTAACACAAGATAACTCAATGCTGGATGAAATGTTTATTGTAGATCGGAAGAGCGGTTTCAG    |
| chr6  | 152415714 | 152415753 | ESR1_8842  | + | GTGACCTATGCACCAGACGTTGTGGGCTTCTACAGGAGAGACATAAAGAAAACATGCCAGATCGGAAGAGCGGTTTCAG      |
| chr6  | 152420112 | 152420151 | ESR1_8843  | + | GTGACCTATGCACCAGACGTTGCTCCACACGGTTTCAGATAATCCCTGCTGCATTTTACCAGATCGGAAGAGCGGTTTCAG    |
| chr7  | 128471054 | 128471093 | FLNC_8844  | + | GTGACCTATGCACCAGACGTTGGGGCGAGGGCACGGGCTGCGGGGATAGGGTCTGCCAAGATCGGAAGAGCGGTTTCAG      |
| chr7  | 128475639 | 128475678 | FLNC_8845  | + | GTGACCTATGCACCAGACGTTGAGCAGCAGCATGGAGCCCTTAGCTCCCAAAGACAGAAGATCGGAAGAGCGGTTTCAG      |
| chr7  | 128477322 | 128477361 | FLNC_8846  | + | GTGACCTATGCACCAGACGTAGATGGGGCAGGGGGAAAGGGGGCAGGGGCAGAGGTTGGAGATCGGAAGAGCGGTTTCAG     |
| chr7  | 128477613 | 128477652 | FLNC_8847  | + | GTGACCTATGCACCAGACGTGCCCTGGCGGCCCTCTGGGCAGCTGGGCACATGTAGGCAGATCGGAAGAGCGGTTTCAG      |
| chr7  | 128477820 | 128477859 | FLNC_8848  | + | GTGACCTATGCACCAGACGTTGCCGCTGGGGACAGAGGGATTCACTTGGGATTGGAACAGAGATCGGAAGAGCGGTTTCAG    |
| chr7  | 128478129 | 128478168 | FLNC_8849  | + | GTGACCTATGCACCAGACGTTAGGCCCCCTGCCTGCGCTGCTCTTACATCCTTGGTTAGATCGGAAGAGCGGTTTCAG       |
| chr7  | 128478494 | 128478533 | FLNC_8850  | + | GTGACCTATGCACCAGACGTTCCCGGGGTCAGGTGCAAGTGAAGCCCTGACCATTGTGGGGAGATCGGAAGAGCGGTTTCAG   |
| chr7  | 128478868 | 128478907 | FLNC_8851  | + | GTGACCTATGCACCAGACGTTTCACTGCTCCCAAGGTAGCCCTTACCAGAGCCAGAGGCAGATCGGAAGAGCGGTTTCAG     |
| chr7  | 128480225 | 128480264 | FLNC_8852  | + | GTGACCTATGCACCAGACGTTGAGCCAGGGTCTGAGGGTGGGGCTGGGGATCATAAGGAGATCGGAAGAGCGGTTTCAG      |
| chr7  | 128480739 | 128480778 | FLNC_8853  | + | GTGACCTATGCACCAGACGTTGCGCCCCCATGCTGTCTGTCTAGGCCATCACAGGAGAGATCGGAAGAGCGGTTTCAG       |
| chr7  | 128481035 | 128481074 | FLNC_8854  | + | GTGACCTATGCACCAGACGTTGGGGGGCAGGAGGAGGGAGTCTGCGGGGGAGGGCAGCAGAGATCGGAAGAGCGGTTTCAG    |
| chr7  | 128481428 | 128481467 | FLNC_8855  | + | GTGACCTATGCACCAGACGTAGCTCACACACCTGCCCCGGGGTGGGGCAAGCTGGTTAGATCGGAAGAGCGGTTTCAG       |
| chr7  | 128481632 | 128481671 | FLNC_8856  | + | GTGACCTATGCACCAGACGTTCCAGCTCTGCTGCCCTTACTACCCATGGCAGGGACCCAGATCGGAAGAGCGGTTTCAG      |
| chr7  | 128482439 | 128482478 | FLNC_8857  | + | GTGACCTATGCACCAGACGTTCCGGCTGCCCGTGCACCCACACAGGAGGTTCCCTGAGGGAAGATCGGAAGAGCGGTTTCAG   |
| chr7  | 128482763 | 128482802 | FLNC_8858  | + | GTGACCTATGCACCAGACGTTCCGGAAGGGTGGGTCTGGGAGGGGGCGGGGTGAGTCAAGATCGGAAGAGCGGTTTCAG      |
| chr7  | 128483019 | 128483058 | FLNC_8859  | + | GTGACCTATGCACCAGACGTTCTGGTACTCACAGCAGATGCACCTGCCAGCTCCAGAAGATCGGAAGAGCGGTTTCAG       |
| chr7  | 128483384 | 128483423 | FLNC_8860  | + | GTGACCTATGCACCAGACGTTGGGCAGGGGCTGGGACTGCCCTCAGGTTGGGGTTAGTGGAGATCGGAAGAGCGGTTTCAG    |
| chr7  | 128483642 | 128483681 | FLNC_8861  | + | GTGACCTATGCACCAGACGTTCCCTCCCATCTACCGCCCGCCGCCCCAGAGCCCTAGATCGGAAGAGCGGTTTCAG         |
| chr7  | 128483978 | 128484017 | FLNC_8862  | + | GTGACCTATGCACCAGACGTTCAAGACACCTGGGAGTGGGCTATTCCGGTAGGGTGAAGATCGGAAGAGCGGTTTCAG       |
| chr7  | 128484331 | 128484370 | FLNC_8863  | + | GTGACCTATGCACCAGACGTAGGAGCTGGTTGGGGCTGGGAGTTGGGGACTTGTGGAAAGATCGGAAGAGCGGTTTCAG      |
| chr7  | 128485320 | 128485359 | FLNC_8864  | + | GTGACCTATGCACCAGACGTAGGAGGAGCCAAGAAAGTCAAGTGGCAGGTGCAGGAGCTAGATCGGAAGAGCGGTTTCAG     |
| chr7  | 128486228 | 128486267 | FLNC_8865  | + | GTGACCTATGCACCAGACGTTGGGGCCAGGCTAGTGGGCAGGGCTGGGCAAGTGGGCAGGAGATCGGAAGAGCGGTTTCAG    |
| chr7  | 128486528 | 128486567 | FLNC_8866  | + | GTGACCTATGCACCAGACGTTCTTTGCTAGCCTAAATCTGTGACCACCTTTCCAGCCAGATCGGAAGAGCGGTTTCAG       |
| chr7  | 128486970 | 128487009 | FLNC_8867  | + | GTGACCTATGCACCAGACGTAGATGGTGGGGCTCAGGGAAGACAAGGAGGTTGCAGAGATCGGAAGAGCGGTTTCAG        |
| chr7  | 128487929 | 128487968 | FLNC_8868  | + | GTGACCTATGCACCAGACGTTCCGGGCGAGGGAGGAGGAGGCTGGGGCAGGACGCCGGAAGATCGGAAGAGCGGTTTCAG     |
| chr7  | 128488133 | 128488172 | FLNC_8869  | + | GTGACCTATGCACCAGACGTTGCCCTGGGCTCCTGTGCTGCGGCTGAGCTCTGGGGTGTCTAGATCGGAAGAGCGGTTTCAG   |
| chr7  | 128488782 | 128488821 | FLNC_8870  | + | GTGACCTATGCACCAGACGTTGTCATCCACCCCGAGGTCATGCTCCAGGCACAGGGGAGATCGGAAGAGCGGTTTCAG       |
| chr7  | 128489047 | 128489086 | FLNC_8871  | + | GTGACCTATGCACCAGACGTACCCGCTGCCCGTGCCTGCTACCACCCAGCCCTCAAAAAGATCGGAAGAGCGGTTTCAG      |
| chr7  | 128489269 | 128489308 | FLNC_8872  | + | GTGACCTATGCACCAGACGTTTTCTCTCTCTTCTTGGTGGGCGAGGGTGGTTGGCGGAGATCGGAAGAGCGGTTTCAG       |
| chr7  | 128489643 | 128489682 | FLNC_8873  | + | GTGACCTATGCACCAGACGTTAGCCACCAAGTACTAGTGGCTGGGAGGGGGCTGGAGATCGGAAGAGCGGTTTCAG         |
| chr7  | 128491008 | 128491047 | FLNC_8874  | + | GTGACCTATGCACCAGACGTTGCTGGGCTGGGCTGGGGCTGGGTGAGAGGAGCAGGCCAGATCGGAAGAGCGGTTTCAG      |

|      |           |           |           |   |                                                                                      |
|------|-----------|-----------|-----------|---|--------------------------------------------------------------------------------------|
| chr7 | 128491425 | 128491464 | FLNC_8875 | + | GTGACCTATGCACCAGACGTTGCAGGTGCGAGGCTGGGGTGGAGACTCACCAGGGGCAGGAGATCGGAAGAGCGGTTTCAG    |
| chr7 | 128491693 | 128491732 | FLNC_8876 | + | GTGACCTATGCACCAGACGTTGTATGGGCATGTACAGCCCATGAGGCACACACCCGCATAGATCGGAAGAGCGGTTTCAG     |
| chr7 | 128492817 | 128492856 | FLNC_8877 | + | GTGACCTATGCACCAGACGTGGCCTCACGGGGACCTCAGGGGTGGGGGCCACAGGATGCAGATCGGAAGAGCGGTTTCAG     |
| chr7 | 128493096 | 128493135 | FLNC_8878 | + | GTGACCTATGCACCAGACGTCCCCAGAGAGCCCCATTCCAGCGGGTGCCTCCCACAGGCAGATCGGAAGAGCGGTTTCAG     |
| chr7 | 128493686 | 128493725 | FLNC_8879 | + | GTGACCTATGCACCAGACGTGGGCAGAGGTCGTTGGCGAGAGACAGGGAGGCCAGGAGGCAGATCGGAAGAGCGGTTTCAG    |
| chr7 | 128493902 | 128493941 | FLNC_8880 | + | GTGACCTATGCACCAGACGTGGAGGACCCCTGGTGGGGCGGGTGTGGGAGAGGGTGGCAGATCGGAAGAGCGGTTTCAG      |
| chr7 | 128494320 | 128494320 | FLNC_8881 | + | GTGACCTATGCACCAGACGTGCACACTGGGCCGGCCGGTCTCACGGCGGGATGGGAGGGAGATCGGAAGAGCGGTTTCAG     |
| chr7 | 128494747 | 128494786 | FLNC_8882 | + | GTGACCTATGCACCAGACGTGGTGGCCAGGAGTGGGGATGAAGTCAGGGCAGCCAGTGTGAGATCGGAAGAGCGGTTTCAG    |
| chr7 | 128494977 | 128495016 | FLNC_8883 | + | GTGACCTATGCACCAGACGTACACTGGCAGTGGGGCTGGGCCGCCTGACCTTCCAGACTAGATCGGAAGAGCGGTTTCAG     |
| chr7 | 128495379 | 128495418 | FLNC_8884 | + | GTGACCTATGCACCAGACGTAGGGTGGGGGTGGAGGGTTTCTGCTATCTGAGAGATGGGCAGATCGGAAGAGCGGTTTCAG    |
| chr7 | 128496715 | 128496754 | FLNC_8885 | + | GTGACCTATGCACCAGACGTCTGCCCTGCCAAGTCCCTTCCGGGCTGGGGCCTTCTGGAGATCGGAAGAGCGGTTTCAG      |
| chr7 | 128496986 | 128497025 | FLNC_8886 | + | GTGACCTATGCACCAGACGTGGAGCTGGGGAACAGGTGACTTCTGGGGTGTCTGGCCAAGATCGGAAGAGCGGTTTCAG      |
| chr7 | 128497401 | 128497440 | FLNC_8887 | + | GTGACCTATGCACCAGACGTGTTTGGGGAGGTCCACCCAGCTGCAGCCAGCCAGCCAGATCGGAAGAGCGGTTTCAG        |
| chr7 | 128498282 | 128498321 | FLNC_8888 | + | GTGACCTATGCACCAGACGTGGGGGAGGGCGTCTCCGGGGTGTGAGCAAGAAGCCGTCAAGATCGGAAGAGCGGTTTCAG     |
| chr7 | 128485021 | 128485060 | FLNC_8889 | + | GTGACCTATGCACCAGACGTGGCAAGGTCGGTGTAGGCAGCCACCTTCACTGTGGACTGCTAGATCGGAAGAGCGGTTTCAG   |
| chr2 | 216226360 | 216226399 | FN1_8890  | + | GTGACCTATGCACCAGACGTGGAAGAAGGAAAAAAATTAGTGGCAAATAGTAAAGTAGATCGGAAGAGCGGTTTCAG        |
| chr2 | 216226813 | 216226852 | FN1_8891  | + | GTGACCTATGCACCAGACGTAGAGCAGGAAAGTCAAATGGGTTTATGATAAAGTGGAGATCGGAAGAGCGGTTTCAG        |
| chr2 | 216229719 | 216229758 | FN1_8892  | + | GTGACCTATGCACCAGACGTACACAAGACAGTGCACCGCAATGAGAAACAATAGTGCAGATCGGAAGAGCGGTTTCAG       |
| chr2 | 216230364 | 216230403 | FN1_8893  | + | GTGACCTATGCACCAGACGTGGGGAAAGTCAGGACAAAAAGTTATTTGTATATTCTGACAGATCGGAAGAGCGGTTTCAG     |
| chr2 | 216232761 | 216232800 | FN1_8894  | + | GTGACCTATGCACCAGACGTAAAGGAAGAAAAAGCAAAAAGACATCTTATTAATCGATTAGATCGGAAGAGCGGTTTCAG     |
| chr2 | 216235166 | 216235205 | FN1_8895  | + | GTGACCTATGCACCAGACGTCCGTACATCCAAAGCAGAGAGAAAGCATTATAGTGTAGGAAAGATCGGAAGAGCGGTTTCAG   |
| chr2 | 216236749 | 216236788 | FN1_8896  | + | GTGACCTATGCACCAGACGTATTTGGATTGAGTCCCGGACCGTGTGGGTACAGGTGATAGAGATCGGAAGAGCGGTTTCAG    |
| chr2 | 216237109 | 216237148 | FN1_8897  | + | GTGACCTATGCACCAGACGTGAGGTTAGAGTCAAAAGCAAAAGCGCATTAAAGTCCAGGAGATCGGAAGAGCGGTTTCAG     |
| chr2 | 216237034 | 216237073 | FN1_8898  | + | GTGACCTATGCACCAGACGTAACATCCAAAGTCTCTGGTCCATGAAAGTTGGGGTGTGGAAGATCGGAAGAGCGGTTTCAG    |
| chr2 | 216238145 | 216238184 | FN1_8899  | + | GTGACCTATGCACCAGACGTAATAGAACCATCACATTATGTCATGGGCTCAGCTAGTCAAGATCGGAAGAGCGGTTTCAG     |
| chr2 | 216240127 | 216240166 | FN1_8900  | + | GTGACCTATGCACCAGACGTACAAAATTAAGTCTCTAAGAAGGCAATAACCAAGAAAATAGATCGGAAGAGCGGTTTCAG     |
| chr2 | 216240452 | 216240491 | FN1_8901  | + | GTGACCTATGCACCAGACGTAGAAGAGATGATTTTTAACAGTCTTGTCTTTTACTAGGAAGATCGGAAGAGCGGTTTCAG     |
| chr2 | 216241408 | 216241447 | FN1_8902  | + | GTGACCTATGCACCAGACGTGCATAGCTAGAGATTAGTGCCTGCTTGGCTCATCCATGTAAGATCGGAAGAGCGGTTTCAG    |
| chr2 | 216242996 | 216243035 | FN1_8903  | + | GTGACCTATGCACCAGACGTAAGGGCATGGTAGCTTTAGCAACGTCCTCAACTGAAACCAGATCGGAAGAGCGGTTTCAG     |
| chr2 | 216244051 | 216244090 | FN1_8904  | + | GTGACCTATGCACCAGACGTTGTCATTTGGTTAGGTTTACTTATAGGAAATGGGGGAAAAAGATCGGAAGAGCGGTTTCAG    |
| chr2 | 216245814 | 216245853 | FN1_8905  | + | GTGACCTATGCACCAGACGTAATTAATGGTAAGAGTTATGTGAAAAGCAAGTTGTGAAAAGATCGGAAGAGCGGTTTCAG     |
| chr2 | 216247059 | 216247098 | FN1_8906  | + | GTGACCTATGCACCAGACGTAGTGAAGCAAAATGCAACATCCACGTCATCCACTATAAAGATCGGAAGAGCGGTTTCAG      |
| chr2 | 216248217 | 216248256 | FN1_8907  | + | GTGACCTATGCACCAGACGTAAGCAGGGAGAAAACAGTGAAGCCCACTCCTTGGAGACAAGATCGGAAGAGCGGTTTCAG     |
| chr2 | 216248918 | 216248957 | FN1_8908  | + | GTGACCTATGCACCAGACGTAAGGTTAGTTAGTTCAGAGTGTGAGGGGTTTAGAGCTACTTGGAGATCGGAAGAGCGGTTTCAG |
| chr2 | 216249710 | 216249749 | FN1_8909  | + | GTGACCTATGCACCAGACGTAAGGAAAATTTTTACATCCGTAATTTTTCAAACAATATTCAGATCGGAAGAGCGGTTTCAG    |
| chr2 | 216251692 | 216251731 | FN1_8910  | + | GTGACCTATGCACCAGACGTACCCGGGGGAGGAAGAGAAAAAAGAAAAAGACACCAAGATCGGAAGAGCGGTTTCAG        |
| chr2 | 216253035 | 216253074 | FN1_8911  | + | GTGACCTATGCACCAGACGTAATGGGGCTTATTTAAAACCTCTGCTCAAAGCATGAGAAGATCGGAAGAGCGGTTTCAG      |
| chr2 | 216256548 | 216256587 | FN1_8912  | + | GTGACCTATGCACCAGACGTACAAGAAGGAAAGACTCAGTTAATGTAATTTTTAAAATTAAGATCGGAAGAGCGGTTTCAG    |
| chr2 | 216257937 | 216257976 | FN1_8913  | + | GTGACCTATGCACCAGACGTACAAGCAAAAGGGAGGGGAGGCCAAAAGGAAAATAGAGGGAGATCGGAAGAGCGGTTTCAG    |
| chr2 | 216259453 | 216259492 | FN1_8914  | + | GTGACCTATGCACCAGACGTAAGAAAAGGGAAGTTATTGCACAGAGGATCTGTGAGCCAGAGATCGGAAGAGCGGTTTCAG    |
| chr2 | 216261957 | 216261996 | FN1_8915  | + | GTGACCTATGCACCAGACGTAGAACAATTTTAAAAGTCAAAGCTGACACAAAAGCTTGGACAGATCGGAAGAGCGGTTTCAG   |
| chr2 | 216262582 | 216262621 | FN1_8916  | + | GTGACCTATGCACCAGACGTGAATGCAAAGTAAACACCAAGGACAAATATTTCCAGAGGAAGATCGGAAGAGCGGTTTCAG    |
| chr2 | 216264085 | 216264124 | FN1_8917  | + | GTGACCTATGCACCAGACGTGAATCAATGCACATATTTAAAACCTCAAACCTCACAGATGATAGATCGGAAGAGCGGTTTCAG  |
| chr2 | 216269389 | 216269428 | FN1_8918  | + | GTGACCTATGCACCAGACGTAGATGAAACATGCCAAGAAATTTAGATCAGTAATGATCAGATCGGAAGAGCGGTTTCAG      |
| chr2 | 216271244 | 216271283 | FN1_8919  | + | GTGACCTATGCACCAGACGTAGAGTCAACTGGTCACTTACATCTCTGCTGAAGATTACTAGATCGGAAGAGCGGTTTCAG     |
| chr2 | 216272055 | 216272094 | FN1_8920  | + | GTGACCTATGCACCAGACGTATGAGCAAAAGTAAAGTGCAGCTGTTTTCTTTGAGACAGAGATCGGAAGAGCGGTTTCAG     |
| chr2 | 216272931 | 216272970 | FN1_8921  | + | GTGACCTATGCACCAGACGTAAGAAAAGTGGGGCAAAACAGTCAGGAAGTGTACTACAGGCAGATCGGAAGAGCGGTTTCAG   |
| chr2 | 216273160 | 216273199 | FN1_8922  | + | GTGACCTATGCACCAGACGTAAGAAAAGGTAACATAATCAGAGCAAACCTAGTCCCTCAAAGATCGGAAGAGCGGTTTCAG    |
| chr2 | 216274473 | 216274512 | FN1_8923  | + | GTGACCTATGCACCAGACGTACAGAAAAGGGAAAAGTCCAGCTTCACTATCAGAAAATAGATCGGAAGAGCGGTTTCAG      |
| chr2 | 216279692 | 216279731 | FN1_8924  | + | GTGACCTATGCACCAGACGTAAGTGTAGCATTTAATTATCTTGAATATTCACCTCACTCAAGATCGGAAGAGCGGTTTCAG    |
| chr2 | 216284119 | 216284158 | FN1_8925  | + | GTGACCTATGCACCAGACGTTGGAAGGAAAAGATAAACAGCCTTGAAGACTTATAACTACAGATCGGAAGAGCGGTTTCAG    |
| chr2 | 216285535 | 216285574 | FN1_8926  | + | GTGACCTATGCACCAGACGTAAGCAGGTGAGTGAGAACTTTTTAAAGTTCCATTGAAGATCGGAAGAGCGGTTTCAG        |
| chr2 | 216286977 | 216287016 | FN1_8927  | + | GTGACCTATGCACCAGACGTATGGATAAGAAATGCACTTGATAAATGATCACCAGGTCTAAGATCGGAAGAGCGGTTTCAG    |
| chr2 | 216288260 | 216288299 | FN1_8928  | + | GTGACCTATGCACCAGACGTCAATACACAACAAGAAGGAAAAGATTACCGCTGAGCTTTAGATCGGAAGAGCGGTTTCAG     |
| chr2 | 216289059 | 216289098 | FN1_8929  | + | GTGACCTATGCACCAGACGTAATCAAAAGAGTGTGAGTAAACAGAGATGCTTTATCTCCAGATCGGAAGAGCGGTTTCAG     |
| chr2 | 216290019 | 216290058 | FN1_8930  | + | GTGACCTATGCACCAGACGTGAAAAGGGAATGTCACAAAACCTGGGTGAGAGAAGACAATAGATCGGAAGAGCGGTTTCAG    |
| chr2 | 216293072 | 216293111 | FN1_8931  | + | GTGACCTATGCACCAGACGTAAGGAAAAGCATAACATCAGTCCAGAGTCCGAAATGAGATCGGAAGAGCGGTTTCAG        |
| chr2 | 216295586 | 216295625 | FN1_8932  | + | GTGACCTATGCACCAGACGTAATTTGGAAGAAAACAGGAAAAAAGTTATTTGAAATTGAGATCGGAAGAGCGGTTTCAG      |

|       |           |           |            |   |                                                                                      |
|-------|-----------|-----------|------------|---|--------------------------------------------------------------------------------------|
| chr2  | 216296698 | 216296737 | FN1_8933   | + | GTGACCTATGCACCAGACGTTACAACGAAATGTTAGGAGAGGGCAGAACAGATTTTTTTAGATCGGAAGAGCGGTTTCCAG    |
| chr2  | 216298195 | 216298234 | FN1_8934   | + | GTGACCTATGCACCAGACGTAAGGAAAGTCCATGTGAGCCTCACTTAGGTACAAGCTTTTATAGATCGGAAGAGCGGTTCCAG  |
| chr2  | 216299558 | 216299597 | FN1_8935   | + | GTGACCTATGCACCAGACGTTTGAAGGAAACGTTACATTTGCATTTCTCCTTTTCCCAAAGATCGGAAGAGCGGTTCCAG     |
| chr2  | 216300536 | 216300575 | FN1_8936   | + | GTGACCTATGCACCAGACGTTGGGGGAGAGACGCCCGACCGGGAGGCAAGTTGCCACCAAGATCGGAAGAGCGGTTCCAG     |
| chr3  | 119545713 | 119545752 | GSK3B_8937 | + | GTGACCTATGCACCAGACGTTAAAAGTCCCAAGAGAGAGCATGAGCAATGCTATAACAACAAGATCGGAAGAGCGGTTCCAG   |
| chr3  | 119562211 | 119562250 | GSK3B_8938 | + | GTGACCTATGCACCAGACGTTTAAAGACAATAAGGTAGAGTCCACTTTAACTTTGTATGAGATCGGAAGAGCGGTTCCAG     |
| chr3  | 119582463 | 119582502 | GSK3B_8939 | + | GTGACCTATGCACCAGACGTTAAAAAAGGGAAGAACAATTAATGTTTATTTTAAAGAACAGATCGGAAGAGCGGTTCCAG     |
| chr3  | 119585486 | 119585525 | GSK3B_8940 | + | GTGACCTATGCACCAGACGTTAATGCAGTGAATAATCCAACAGGGGAAAGTCAATCCAAGATCGGAAGAGCGGTTCCAG      |
| chr3  | 119595366 | 119595405 | GSK3B_8941 | + | GTGACCTATGCACCAGACGTAGCAAGTTATTGCCATCTTTTCTATATATTTACAAATTTAGATCGGAAGAGCGGTTCCAG     |
| chr3  | 119624710 | 119624749 | GSK3B_8942 | + | GTGACCTATGCACCAGACGTAAGAAAAAGAACGCTTATAAATACTTCATAGCTTGAGCTGAGATCGGAAGAGCGGTTCCAG    |
| chr3  | 119631668 | 119631707 | GSK3B_8943 | + | GTGACCTATGCACCAGACGTTAAAATAAAAAATAAAAAAGCAGAATTTCTTTAAATCTAAACAGATCGGAAGAGCGGTTCCAG  |
| chr3  | 119635032 | 119635071 | GSK3B_8944 | + | GTGACCTATGCACCAGACGTTAGTAGAAATTAATAAATCTTCCTATTTCTAAACAAATCAGATCGGAAGAGCGGTTCCAG     |
| chr3  | 119642341 | 119642380 | GSK3B_8945 | + | GTGACCTATGCACCAGACGTTTATTTAAAAACAAAAAACAAACAGATTAGAAACTGGAGATCGGAAGAGCGGTTCCAG       |
| chr3  | 119666209 | 119666248 | GSK3B_8946 | + | GTGACCTATGCACCAGACGTTAACACATAAAAAATATATTTTTAAAGGATAACAGCTATTCAAGATCGGAAGAGCGGTTCCAG  |
| chr3  | 119721097 | 119721136 | GSK3B_8947 | + | GTGACCTATGCACCAGACGTTAAAGGAAATTTTTTTTTCACGAGAACTGTAAGGAATTTAAAGATCGGAAGAGCGGTTCCAG   |
| chr3  | 119812292 | 119812331 | GSK3B_8948 | + | GTGACCTATGCACCAGACGTTTTCGCGAATCACCTTTTCTTCTCCTTCTCTCTTCTCTCTAGATCGGAAGAGCGGTTCCAG    |
| chr6  | 114262263 | 114262302 | HDAC2_8949 | + | GTGACCTATGCACCAGACGTAGGCAATGTGAAATATAAAAATGGCACACTTTGGTGTAAAGATCGGAAGAGCGGTTCCAG     |
| chr6  | 114264681 | 114264720 | HDAC2_8950 | + | GTGACCTATGCACCAGACGTTTATTTAAATAAATTTTGACAAAAACAGACTCACAGTTTTATAGATCGGAAGAGCGGTTCCAG  |
| chr6  | 114265585 | 114265624 | HDAC2_8951 | + | GTGACCTATGCACCAGACGTCATGCAAAGTTTTATTGACAAAAATTAATTTTCTTTGCAAGTATGATCGGAAGAGCGGTTCCAG |
| chr6  | 114266645 | 114266684 | HDAC2_8952 | + | GTGACCTATGCACCAGACGTTCAATAAAATAAAGTTACATATTACAAGCTCAGTTTTTCAAGATCGGAAGAGCGGTTCCAG    |
| chr6  | 114267323 | 114267362 | HDAC2_8953 | + | GTGACCTATGCACCAGACGTTAAGATTTGGGTAACAACAAAATCTGCATACTGCAACAGTTAGATCGGAAGAGCGGTTCCAG   |
| chr6  | 114270262 | 114270301 | HDAC2_8954 | + | GTGACCTATGCACCAGACGTGATAACAATGTTAGCATCTCCAATAACATTCTGAAATTCAGATCGGAAGAGCGGTTCCAG     |
| chr6  | 114270435 | 114270474 | HDAC2_8955 | + | GTGACCTATGCACCAGACGTTAATTAATGATCTTAGAGAAATTTCTATAATAAAAAGTAGATCGGAAGAGCGGTTCCAG      |
| chr6  | 114274593 | 114274632 | HDAC2_8956 | + | GTGACCTATGCACCAGACGTTTATTAATAAGTTTTGGTTTTCTTTAAAGGTTCTAAGATGATCGGAAGAGCGGTTCCAG      |
| chr6  | 114277326 | 114277365 | HDAC2_8957 | + | GTGACCTATGCACCAGACGTGAAACAAGATAGACCTTTTAAACATTTATCATAAAAAGTAGATCGGAAGAGCGGTTCCAG     |
| chr6  | 114277868 | 114277907 | HDAC2_8958 | + | GTGACCTATGCACCAGACGTTGGATTTCTTAATTTCAACACATTCTGCAAATTAATGAAAGATCGGAAGAGCGGTTCCAG     |
| chr6  | 114279941 | 114279980 | HDAC2_8959 | + | GTGACCTATGCACCAGACGTTAAATAATGTCAGAAGTGTGGAATTAACAACCGGTTATATCAGATCGGAAGAGCGGTTCCAG   |
| chr6  | 114281193 | 114281232 | HDAC2_8960 | + | GTGACCTATGCACCAGACGTTAAAGACACAAAATAACAGACAAGAGACCCTCCATAGATCGGAAGAGCGGTTCCAG         |
| chr6  | 114292365 | 114292404 | HDAC2_8961 | + | GTGACCTATGCACCAGACGTTCCACGGGGGAGAAAGGGGACAGGCTGGAGAGGAGCCAGATCGGAAGAGCGGTTCCAG       |
| chr7  | 27203471  | 27203510  | HOXA9_8962 | + | GTGACCTATGCACCAGACGTGAGAACAATCTGGTATTAGGACAGAGAAGACGCCACATCCCGCAGATCGGAAGAGCGGTTCCAG |
| chr7  | 27205087  | 27205126  | HOXA9_8963 | + | GTGACCTATGCACCAGACGTAGCGCCTGGCCCGCCCGGCCAGCCACGGAAATTTATGAAAGATCGGAAGAGCGGTTCCAG     |
| chr7  | 27204797  | 27204836  | HOXA9_8964 | + | GTGACCTATGCACCAGACGTGGTGACGTAGGGGTGGTGGTATGGTGGTGGTACACCGCAGATCGGAAGAGCGGTTCCAG      |
| chr11 | 64572299  | 64572338  | MEN1_8965  | + | GTGACCTATGCACCAGACGTGGGGAGAGCAAGGTGAGAGCAAGGTTGCCGGCCAGTGGCTAGATCGGAAGAGCGGTTCCAG    |
| chr11 | 64572681  | 64572720  | MEN1_8966  | + | GTGACCTATGCACCAGACGTGGGAAGGGGACAGCATGCTCTTACTCACCCCTTAAGATCGGAAGAGCGGTTCCAG          |
| chr11 | 64573253  | 64573292  | MEN1_8967  | + | GTGACCTATGCACCAGACGTAGTGGGGTCTGCTGAGGGTCTGAAAGGGGCTCACCATCGGATCGGAAGAGCGGTTCCAG      |
| chr11 | 64573851  | 64573890  | MEN1_8968  | + | GTGACCTATGCACCAGACGTGTGAGGCAGAGGATCCTCAGGGAGGCAGCCCCAGCTGCCAGATCGGAAGAGCGGTTCCAG     |
| chr11 | 64574581  | 64574620  | MEN1_8969  | + | GTGACCTATGCACCAGACGTATCATAATTCAGGCTGCCACCCAGCCCCGGCCTCACCAAGATCGGAAGAGCGGTTCCAG      |
| chr11 | 64574702  | 64574741  | MEN1_8970  | + | GTGACCTATGCACCAGACGTAAGGAGAGAGTTATGAGCCACGGAACAGGGAGGAGAACCGAGATCGGAAGAGCGGTTCCAG    |
| chr11 | 64575163  | 64575202  | MEN1_8971  | + | GTGACCTATGCACCAGACGTGATGAGATCATTATGTCTCATGATGGCCACCCTGTGCCTAGATCGGAAGAGCGGTTCCAG     |
| chr11 | 64575582  | 64575621  | MEN1_8972  | + | GTGACCTATGCACCAGACGTGGGAGGTAATGAAAGAGGGTCTGTGCTTTAATACATGGGAGATCGGAAGAGCGGTTCCAG     |
| chr11 | 64577592  | 64577631  | MEN1_8973  | + | GTGACCTATGCACCAGACGTGGTGGCGCCGGCTGCAAGGCTCAAGCCGGGGAGGGAGATCGGAAGAGCGGTTCCAG         |
| chr22 | 36678842  | 36678881  | MYH9_8974  | + | GTGACCTATGCACCAGACGTAGGTAGAAGCAGAGGGTACAGCGGGCCCGGCCAGGCCAGGGAGATCGGAAGAGCGGTTCCAG   |
| chr22 | 36680322  | 36680361  | MYH9_8975  | + | GTGACCTATGCACCAGACGTGGACGTGTGGCCCGTGGCCCGGTTAGGGGCTCTGGGCGTAGATCGGAAGAGCGGTTCCAG     |
| chr22 | 36680568  | 36680607  | MYH9_8976  | + | GTGACCTATGCACCAGACGTGACAAGGTGGCTCAGAGGGAAACACCTCTTCAGAGGGTCAGATCGGAAGAGCGGTTCCAG     |
| chr22 | 36681386  | 36681425  | MYH9_8977  | + | GTGACCTATGCACCAGACGTAGGGCCAGTACCTTTGGGAGGGCTGGGGCCCTGGCTGGAAGATCGGAAGAGCGGTTCCAG     |
| chr22 | 36681838  | 36681877  | MYH9_8978  | + | GTGACCTATGCACCAGACGTGGCGGGAGAAGTGAAGGGCTACCTCGGGACACACTGGAGATCGGAAGAGCGGTTCCAG       |
| chr22 | 36682010  | 36682049  | MYH9_8979  | + | GTGACCTATGCACCAGACGTGACCCAGAGTGTGACCTAAAGGCAGCCACAGCCCCACAAGAGATCGGAAGAGCGGTTCCAG    |
| chr22 | 36682903  | 36682942  | MYH9_8980  | + | GTGACCTATGCACCAGACGTGACAGAGGCTTGGCACCCACCCAGCTCCTTGGCCCTCAAGATCGGAAGAGCGGTTCCAG      |
| chr22 | 36684470  | 36684509  | MYH9_8981  | + | GTGACCTATGCACCAGACGTGAACATCAACAATTTGGGAAGCTGGACCCACTGGGAGACCAGATCGGAAGAGCGGTTCCAG    |
| chr22 | 36684996  | 36685035  | MYH9_8982  | + | GTGACCTATGCACCAGACGTGAGAGCCCAAGTCAAGGAGCAAAGGGACTGGCAGGTACCTGAGATCGGAAGAGCGGTTCCAG   |
| chr22 | 36685354  | 36685393  | MYH9_8983  | + | GTGACCTATGCACCAGACGTGGTGGCCACCATGAGGCTCAGGCTACGGCCCCACAGGATCGGAAGAGCGGTTCCAG         |
| chr22 | 36688320  | 36688359  | MYH9_8984  | + | GTGACCTATGCACCAGACGTGCAAGGTAAGACATGCCAGATGGCACCCTGCTCAGGAGATCGGAAGAGCGGTTCCAG        |
| chr22 | 36689538  | 36689577  | MYH9_8985  | + | GTGACCTATGCACCAGACGTGTTGAGAGGGGTGCGGGTCTTAGGAGGGTGGTGTCCAAAAGATCGGAAGAGCGGTTCCAG     |
| chr22 | 36689920  | 36689959  | MYH9_8986  | + | GTGACCTATGCACCAGACGTGGGGGAGACACAAAGGACCATGGACCCACCCCACTGCTCAGATCGGAAGAGCGGTTCCAG     |
| chr22 | 36690355  | 36690394  | MYH9_8987  | + | GTGACCTATGCACCAGACGTAGAAAGCAAAGACGTGAGTGGGGCCCTCTGACACAAGGCAGATCGGAAGAGCGGTTCCAG     |
| chr22 | 36691133  | 36691172  | MYH9_8988  | + | GTGACCTATGCACCAGACGTTAAATCCCCTCAGAGTGGAGGCCGGGATGCTGGAGCGAGGATCGGAAGAGCGGTTCCAG      |
| chr22 | 36691774  | 36691813  | MYH9_8989  | + | GTGACCTATGCACCAGACGTGACCACCAACATCAGTATAAGGAGATTTACCTCCAAGGATCGGAAGAGCGGTTCCAG        |
| chr22 | 36693071  | 36693110  | MYH9_8990  | + | GTGACCTATGCACCAGACGTGGGGAGGCCACATAGCCCTCAGTGCATGGTTCTGTCTAGATCGGAAGAGCGGTTCCAG       |

|       |          |          |            |   |                                                                                     |
|-------|----------|----------|------------|---|-------------------------------------------------------------------------------------|
| chr22 | 36695099 | 36695138 | MYH9_8991  | + | GTGACCTATGCACCAGACGTGGGAGTAGGCTGGCATTAGTGTGGTTGAGCACAGAACAAGATCGGAAGAGCGGTTTCAG     |
| chr22 | 36696321 | 36696360 | MYH9_8992  | + | GTGACCTATGCACCAGACGTCCAGAGACACGGTAAGGACAGCAGGCCAGAGGCATGGCCAGATCGGAAGAGCGGTTTCAG    |
| chr22 | 36697114 | 36697153 | MYH9_8993  | + | GTGACCTATGCACCAGACGTCAAGTGGAAAAACAAGCTCCTCGCAACACCCTCAAGCCAAGATCGGAAGAGCGGTTTCAG    |
| chr22 | 36697722 | 36697761 | MYH9_8994  | + | GTGACCTATGCACCAGACGTAGATAGAGGTAGAGACATGCTCGGCTGGAAGATGCCCGCCAGATCGGAAGAGCGGTTTCAG   |
| chr22 | 36698733 | 36698772 | MYH9_8995  | + | GTGACCTATGCACCAGACGTAGGAACATGGTCACGCGGGAGCAGTGGACAGCAGACCCGAAGATCGGAAGAGCGGTTTCAG   |
| chr22 | 36700212 | 36700251 | MYH9_8996  | + | GTGACCTATGCACCAGACGTGGAGCAGGCCGCTTTACCTGCCACAGCTGCCACAGCTCAGATCGGAAGAGCGGTTTCAG     |
| chr22 | 36701159 | 36701198 | MYH9_8997  | + | GTGACCTATGCACCAGACGTAAAAGTAGAGCTGGTGCATTTACCCATTGCCTCGATTCCAAGATCGGAAGAGCGGTTTCAG   |
| chr22 | 36702108 | 36702147 | MYH9_8998  | + | GTGACCTATGCACCAGACGTAAACACATGCATGCGGCTCCTACTTCCGTGCCCTAGAACAGTAGATCGGAAGAGCGGTTTCAG |
| chr22 | 36702664 | 36702703 | MYH9_8999  | + | GTGACCTATGCACCAGACGTACAGAGAACACGTGAGTGCCACACAGTTGCAGCTGGGTAGATCGGAAGAGCGGTTTCAG     |
| chr22 | 36705452 | 36705491 | MYH9_9000  | + | GTGACCTATGCACCAGACGTGACAGAGGCAGGAGTCAACAGCTGCGCTGGGGACATGTGTAGATCGGAAGAGCGGTTTCAG   |
| chr22 | 36708278 | 36708317 | MYH9_9001  | + | GTGACCTATGCACCAGACGTGCGCAGCATCAGCACAGGTGAGTGACCCCTGGGAGGGGCACAGATCGGAAGAGCGGTTTCAG  |
| chr22 | 36710374 | 36710413 | MYH9_9002  | + | GTGACCTATGCACCAGACGTAGAAAACAATGTCAGAGAGACGCCAACCCCTGCACATAAGAAAGATCGGAAGAGCGGTTTCAG |
| chr22 | 36714381 | 36714420 | MYH9_9003  | + | GTGACCTATGCACCAGACGTTCAGAGATAAGAGAGGGGACAAAAAGTCCCTAATTAGACCCAGATCGGAAGAGCGGTTTCAG  |
| chr22 | 36715691 | 36715730 | MYH9_9004  | + | GTGACCTATGCACCAGACGTAATCAGAGGCAGCTCAGAAGCAGACATGGGTGATGGTGATAGATCGGAAGAGCGGTTTCAG   |
| chr22 | 36716419 | 36716458 | MYH9_9005  | + | GTGACCTATGCACCAGACGTTGGAGGGCAAGGGCGCCTCAGCGAGGTGCTGAAAGTGAGAGATCGGAAGAGCGGTTTCAG    |
| chr22 | 36716952 | 36716991 | MYH9_9006  | + | GTGACCTATGCACCAGACGTATTAAGGAGCAACAAGCTGGGGAGAAGGCAAGCCCTCCAGATCGGAAGAGCGGTTTCAG     |
| chr22 | 36717877 | 36717916 | MYH9_9007  | + | GTGACCTATGCACCAGACGTAAAGGATAGCAAGAGATCAGAGGTGCCCTGACATGGGGAGAGATCGGAAGAGCGGTTTCAG   |
| chr22 | 36718577 | 36718616 | MYH9_9008  | + | GTGACCTATGCACCAGACGTCCCAGGCGAGTGAAGGCGGGACAGCAGCTGGGCTGCAGATCGGAAGAGCGGTTTCAG       |
| chr22 | 36722717 | 36722756 | MYH9_9009  | + | GTGACCTATGCACCAGACGTAGGCAAGGAAGTCCCGGGCTTAGGCATGCCAAGTCCCTTGAGATCGGAAGAGCGGTTTCAG   |
| chr22 | 36723544 | 36723583 | MYH9_9010  | + | GTGACCTATGCACCAGACGTGAAGACATCAGATTAACCTCCCGCCAGATGCAAAAAGCCTCCAGATCGGAAGAGCGGTTTCAG |
| chr22 | 36737582 | 36737621 | MYH9_9011  | + | GTGACCTATGCACCAGACGTGAGCGGCAGATAGGAACAGGTTAGGAAGTTTGATTCTCAGAGATCGGAAGAGCGGTTTCAG   |
| chr22 | 36745292 | 36745331 | MYH9_9012  | + | GTGACCTATGCACCAGACGTAGCCAGGACCTAAGCGGGGAGGAGAAGGACAACACATTACAGATCGGAAGAGCGGTTTCAG   |
| chr8  | 71025889 | 71025928 | NCOA2_9013 | + | GTGACCTATGCACCAGACGTACAGATAAAAAGTTGTGAAACATCTTTGAGGTTTTGAAAAAGATCGGAAGAGCGGTTTCAG   |
| chr8  | 71033637 | 71033676 | NCOA2_9014 | + | GTGACCTATGCACCAGACGTGAAGACAGGACAGTGGCTACGCAGCAGGACAAGTGTCCAAGAGATCGGAAGAGCGGTTTCAG  |
| chr8  | 71036328 | 71036367 | NCOA2_9015 | + | GTGACCTATGCACCAGACGTATGGAAAGATTGAATGAATGTTACAGCTTGCTGGTATCCAAGATCGGAAGAGCGGTTTCAG   |
| chr8  | 71037111 | 71037150 | NCOA2_9016 | + | GTGACCTATGCACCAGACGTAAAACAGAAACAGAAATCCAAAAGAGACTGTTAGTTATATAGATCGGAAGAGCGGTTTCAG   |
| chr8  | 71039293 | 71039332 | NCOA2_9017 | + | GTGACCTATGCACCAGACGTGGGCAACACATGGAGGAAAATGTCGGGGACAGACATAGATAGATCGGAAGAGCGGTTTCAG   |
| chr8  | 71040756 | 71040795 | NCOA2_9018 | + | GTGACCTATGCACCAGACGTACAAACAGGATGAATACATTTTAAGAACAAGATACATTTTATAGATCGGAAGAGCGGTTTCAG |
| chr8  | 71041226 | 71041265 | NCOA2_9019 | + | GTGACCTATGCACCAGACGTAGTCCCAATAACAACAAATAATTAACCATAAAAACAGAGATCGGAAGAGCGGTTTCAG      |
| chr8  | 71044248 | 71044287 | NCOA2_9020 | + | GTGACCTATGCACCAGACGTAGAAAATGTCACCTTTGGGCAATGAAAAGCTAGTTGATTAGATCGGAAGAGCGGTTTCAG    |
| chr8  | 71050578 | 71050617 | NCOA2_9021 | + | GTGACCTATGCACCAGACGTAGAAGAAAAAATCTTACATCTTAAATCAAGGAAGCATTAGATCGGAAGAGCGGTTTCAG     |
| chr8  | 71053645 | 71053684 | NCOA2_9022 | + | GTGACCTATGCACCAGACGTGCCAAAGAAAACAGAGATGCAAGTGAACATATTAGATCGGAAGAGCGGTTTCAG          |
| chr8  | 71057094 | 71057133 | NCOA2_9023 | + | GTGACCTATGCACCAGACGTAAACAAATGAAAATGGAAGTTAATATAGGATAATGGAAGAAAGATCGGAAGAGCGGTTTCAG  |
| chr8  | 71060729 | 71060768 | NCOA2_9024 | + | GTGACCTATGCACCAGACGTCAAACAGAAAGTTTATCCAGTCTACTCTAAGAGTAGACAAGATCGGAAGAGCGGTTTCAG    |
| chr8  | 71069486 | 71069525 | NCOA2_9025 | + | GTGACCTATGCACCAGACGTAGAAGAAAAAATTAAGATAAAAAGAAAAAATCTTAGAGATCGGAAGAGCGGTTTCAG       |
| chr8  | 71071898 | 71071937 | NCOA2_9026 | + | GTGACCTATGCACCAGACGTGCAAGGAAACAGAGGCAGCTTTAGAAAAAATGAGGAGATCGGAAGAGCGGTTTCAG        |
| chr8  | 71075100 | 71075139 | NCOA2_9027 | + | GTGACCTATGCACCAGACGTACAGCAGGCATTATACCTACATGTTGATCTATTCTTTATAGATCGGAAGAGCGGTTTCAG    |
| chr8  | 71075812 | 71075851 | NCOA2_9028 | + | GTGACCTATGCACCAGACGTACATGTTTACATTTATCATATTTGGGCTTTCTAGTGATTAGATCGGAAGAGCGGTTTCAG    |
| chr8  | 71079000 | 71079039 | NCOA2_9029 | + | GTGACCTATGCACCAGACGTCAAAGTAAATCCAGTTTTACAAAGAAACAAACATCAGATTAGATCGGAAGAGCGGTTTCAG   |
| chr8  | 71082625 | 71082664 | NCOA2_9030 | + | GTGACCTATGCACCAGACGTAAAGTACAATTTGTTAGAAAGATGCAACATAACATCAGATCGGAAGAGCGGTTTCAG       |
| chr8  | 71087105 | 71087144 | NCOA2_9031 | + | GTGACCTATGCACCAGACGTCAATAAGTGTGAATTAATGGCAGTGCATTTTCAAGGACAGATCGGAAGAGCGGTTTCAG     |
| chr8  | 71126321 | 71126360 | NCOA2_9032 | + | GTGACCTATGCACCAGACGTGAAACACATTTTTATGATGATTTTGAAGAAAGAGCTATTGTAGATCGGAAGAGCGGTTTCAG  |
| chr8  | 71128991 | 71129030 | NCOA2_9033 | + | GTGACCTATGCACCAGACGTTATCAGCAACTAAAACAGAAAACAGAGAAGAGGAAAGAAAGATCGGAAGAGCGGTTTCAG    |
| chr8  | 71068639 | 71068678 | NCOA2_9034 | + | GTGACCTATGCACCAGACGTGGCTCCATCTGATCAGATTTGGTGGTGCAGCAGCTGCAGGAAGATCGGAAGAGCGGTTTCAG  |
| chr8  | 71069062 | 71069101 | NCOA2_9035 | + | GTGACCTATGCACCAGACGTAAAGTCTCTGCAGGGGAAAACGACTGGGTGGGATTCGAGAGATCGGAAGAGCGGTTTCAG    |
| chr20 | 5096019  | 5096058  | PCNA_9036  | + | GTGACCTATGCACCAGACGTGGAAGTGTAACTGAGGAGTGTATACATATGAAGATCGGAAGAGCGGTTTCAG            |
| chr20 | 5098321  | 5098360  | PCNA_9037  | + | GTGACCTATGCACCAGACGTCAAAAATTTTCCAAAAGTTAATTGTTAGAAATTTAATGATAGATCGGAAGAGCGGTTTCAG   |
| chr20 | 5099334  | 5099373  | PCNA_9038  | + | GTGACCTATGCACCAGACGTAAAGCAGATGCTTTTGAGAAATACTGACACAGAGTTTTGAAGATCGGAAGAGCGGTTTCAG   |
| chr20 | 5099523  | 5099562  | PCNA_9039  | + | GTGACCTATGCACCAGACGTGGAGACACATGCTTTAAAATCAACGCCGTCTGCTGAAGGGAGATCGGAAGAGCGGTTTCAG   |
| chr20 | 5100455  | 5100494  | PCNA_9040  | + | GTGACCTATGCACCAGACGTTGGCAACAACGCCGCTACAGGCAGCGGGAAAGGAGGAAAGAGATCGGAAGAGCGGTTTCAG   |
| chr15 | 74287293 | 74287332 | PML_9041   | + | GTGACCTATGCACCAGACGTGTTAGGGATGATGGGTTAAGCTTTGTTGGTTTGTGTGATCGGAAGAGCGGTTTCAG        |
| chr15 | 74290828 | 74290867 | PML_9042   | + | GTGACCTATGCACCAGACGTCCGCACAGGTGGGGTGGTGCATCCAAGTACCAGTGAAGATCGGAAGAGCGGTTTCAG       |
| chr15 | 74315760 | 74315799 | PML_9043   | + | GTGACCTATGCACCAGACGTACGCCACCTTCTGGGCGGCTGTGCCTCTGCTGCACCCTAGATCGGAAGAGCGGTTTCAG     |
| chr15 | 74317279 | 74317318 | PML_9044   | + | GTGACCTATGCACCAGACGTTTTGAGGTCTGAAGGGTGGTGGTGGGGCCAGCAGGTCAAGATCGGAAGAGCGGTTTCAG     |
| chr15 | 74325067 | 74325106 | PML_9045   | + | GTGACCTATGCACCAGACGTCCCCAGCCCCAGCCTTCCCTCTGAAGGCCTGAGTTCCACAGATCGGAAGAGCGGTTTCAG    |
| chr15 | 74325766 | 74325805 | PML_9046   | + | GTGACCTATGCACCAGACGTGGGTAGGGCAGTGGCCTGGGTGCTGCCGCCAGGGTCTGGAGATCGGAAGAGCGGTTTCAG    |
| chr15 | 74325774 | 74325813 | PML_9047   | + | GTGACCTATGCACCAGACGTGAGTGGCTGGTGCCTGCCGCCAGGGTCTGGGCGTTCGAGATCGGAAGAGCGGTTTCAG      |
| chr15 | 74326847 | 74326886 | PML_9048   | + | GTGACCTATGCACCAGACGTGGAAGACTGAGTCCGAAAACCTCGGTGAGTGGCCAGAAAGATCGGAAGAGCGGTTTCAG     |

|       |          |          |               |   |                                                                                     |
|-------|----------|----------|---------------|---|-------------------------------------------------------------------------------------|
| chr15 | 74326882 | 74326921 | PML_9049      | + | GTGACCTATGCACCAGACGTGAGGTTCCAGCCAGGACTCCTGCCTCCCCCATTTTCAGAGATCGGAAGAGCGGTTTCAG     |
| chr15 | 74327008 | 74327047 | PML_9050      | + | GTGACCTATGCACCAGACGTGTGCTGAGGACAGTCTCCAATGACAGCTGCATGCCTGGAAGATCGGAAGAGCGGTTTCAG    |
| chr15 | 74328303 | 74328342 | PML_9051      | + | GTGACCTATGCACCAGACGTCTTCTCTTGTAACTTGCAGCCAAACCCCTGCCCGGCCAGATCGGAAGAGCGGTTTCAG      |
| chr15 | 74335491 | 74335530 | PML_9052      | + | GTGACCTATGCACCAGACGTCTGGGGCTACCCACCCCTTCTAATTTAGTCTCTGAGTAGATCGGAAGAGCGGTTTCAG      |
| chr15 | 74335532 | 74335571 | PML_9053      | + | GTGACCTATGCACCAGACGTCCAAAAAAGAGTGCAGGCAGAGCCATCTGCCAGGCCAGGAGATCGGAAGAGCGGTTTCAG    |
| chr15 | 74337360 | 74337399 | PML_9054      | + | GTGACCTATGCACCAGACGTTGACCAGCTTGGAGTCTCTGGTGGCCAGAGAGGGATGGGGAGATCGGAAGAGCGGTTTCAG   |
| chr15 | 74315469 | 74315508 | PML_9055      | + | GTGACCTATGCACCAGACGTGAGCAGCGGGTACCAGCTGAGGACTACGAGGAGATGGCCAGTAGATCGGAAGAGCGGTTTCAG |
| chr15 | 74327913 | 74327952 | PML_9056      | + | GTGACCTATGCACCAGACGTATCCTGCCAATGCCAGGAACATCCTGCCAGCTGCAAAGAGATCGGAAGAGCGGTTTCAG     |
| chr15 | 74336966 | 74337005 | PML_9057      | + | GTGACCTATGCACCAGACGTCTCCTCGAGGTCTCCCGGGCCCCAGCTGGCCAGCATGAGATCGGAAGAGCGGTTTCAG      |
| chr3  | 12393184 | 12393223 | PPARG_9058    | + | GTGACCTATGCACCAGACGTTCAGATACCGGTATTGGGGAGCTGGGGGCAATTTATGTAAGATCGGAAGAGCGGTTTCAG    |
| chr3  | 12421441 | 12421480 | PPARG_9059    | + | GTGACCTATGCACCAGACGTATTTTCACTTTTCAGACTACTAGGACTAGAATTTGGACTCAGATCGGAAGAGCGGTTTCAG   |
| chr3  | 12423001 | 12423040 | PPARG_9060    | + | GTGACCTATGCACCAGACGTAAAAAGTCTTCAAAGAAATTTGAAACTTTTATTTTCAAGATCGGAAGAGCGGTTTCAG      |
| chr3  | 12434262 | 12434301 | PPARG_9061    | + | GTGACCTATGCACCAGACGTAGTGCATACCATATCCTTTATTATTCTATTATAGCTGCCAGATCGGAAGAGCGGTTTCAG    |
| chr3  | 12447591 | 12447630 | PPARG_9062    | + | GTGACCTATGCACCAGACGTCTTCTGCTCTTCTATTGGGGAGGCGGGAAGTTGTTTTGGAGATCGGAAGAGCGGTTTCAG    |
| chr3  | 12458664 | 12458703 | PPARG_9063    | + | GTGACCTATGCACCAGACGTCTTTTGTATCTCTATGAAAGAGGGTGGGATGATGGTGGGAGATCGGAAGAGCGGTTTCAG    |
| chr3  | 12475655 | 12475694 | PPARG_9064    | + | GTGACCTATGCACCAGACGTGAGCCACTGCCAACATTTCCCTTCTTCCAGTTGCACATATAGATCGGAAGAGCGGTTTCAG   |
| chr4  | 23797559 | 23797598 | PPARGC1A_9065 | + | GTGACCTATGCACCAGACGTACCAAAGCCAGTTAGATACACACTTTGGCTGATGGCCATTAGATCGGAAGAGCGGTTTCAG   |
| chr4  | 23803515 | 23803554 | PPARGC1A_9066 | + | GTGACCTATGCACCAGACGTGAAAGAAAGTTCAAAGCTGGTTAAGAAGTATTAGTATATAGATCGGAAGAGCGGTTTCAG    |
| chr4  | 23803979 | 23804018 | PPARGC1A_9067 | + | GTGACCTATGCACCAGACGTAAAGAAAGGAGAGATTCTGGAGTGGGAAAAAGCTAGCCAGATCGGAAGAGCGGTTTCAG     |
| chr4  | 23814501 | 23814540 | PPARGC1A_9068 | + | GTGACCTATGCACCAGACGTAACTTTTACTAAGTCAACCACCTCAATTTTTCATGAGCAGATCGGAAGAGCGGTTTCAG     |
| chr4  | 23814759 | 23814798 | PPARGC1A_9069 | + | GTGACCTATGCACCAGACGTGGAGAAAAGCAAAAAGGGCATTGCAACTGCCACTTAACCAGATCGGAAGAGCGGTTTCAG    |
| chr4  | 23825987 | 23826026 | PPARGC1A_9070 | + | GTGACCTATGCACCAGACGTGGGCACATTTATAAAAAAACTGAAATGGAGTTGCTGTAAGATCGGAAGAGCGGTTTCAG     |
| chr4  | 23826142 | 23826181 | PPARGC1A_9071 | + | GTGACCTATGCACCAGACGTAAAAAGAACTAATATTGATATTTAGTGTCTTTTAGAAGATCGGAAGAGCGGTTTCAG       |
| chr4  | 23830238 | 23830277 | PPARGC1A_9072 | + | GTGACCTATGCACCAGACGTAGGCAATAAAGAAAGCTAAATTTAGTCAACTGAACTTATCAGATCGGAAGAGCGGTTTCAG   |
| chr4  | 23831219 | 23831258 | PPARGC1A_9073 | + | GTGACCTATGCACCAGACGTATCAGGGAAAGGGAAAGCAAGTAAAGTTATGCATCTTTAGATCGGAAGAGCGGTTTCAG     |
| chr4  | 23833385 | 23833424 | PPARGC1A_9074 | + | GTGACCTATGCACCAGACGTAGAAAAAAACAGAAAGATGTGAGTTGACCTGGGAGGACAGGATCGGAAGAGCGGTTTCAG    |
| chr4  | 23886565 | 23886604 | PPARGC1A_9075 | + | GTGACCTATGCACCAGACGTGAGAAAAAAAATTTAAAAAGCTTCCATTAACCACAGGAGATCGGAAGAGCGGTTTCAG      |
| chr4  | 23891591 | 23891630 | PPARGC1A_9076 | + | GTGACCTATGCACCAGACGTAACTGACGCCAGTCAAGCTTTTTCACTCCAATCCACAGTGAGATCGGAAGAGCGGTTTCAG   |
| chr4  | 23815781 | 23815820 | PPARGC1A_9077 | + | GTGACCTATGCACCAGACGTTTGCTTGCCCTCAAAGTCTCTCAGGTAGCACTGTCTGAGATCGGAAGAGCGGTTTCAG      |
| chr17 | 38487659 | 38487698 | RARA_9078     | + | GTGACCTATGCACCAGACGTGTGTGGGGCTGGGGTGGGAAGGGACTGTGGAGGGTGCAAGATCGGAAGAGCGGTTTCAG     |
| chr17 | 38499130 | 38499169 | RARA_9079     | + | GTGACCTATGCACCAGACGTGCCTCTCAGTCTGCTGTTGTAGGGGGTGGGAGTGGGCGGTAGATCGGAAGAGCGGTTTCAG   |
| chr17 | 38504727 | 38504766 | RARA_9080     | + | GTGACCTATGCACCAGACGTGGGGTCAATGGGAAGGACAGCTTGATGAGGTCAATGGGATAGATCGGAAGAGCGGTTTCAG   |
| chr17 | 38506188 | 38506227 | RARA_9081     | + | GTGACCTATGCACCAGACGTAGGGCAGGGGCCAGTCCCGCCTCAGTTGGGGTCTCAGAAGATCGGAAGAGCGGTTTCAG     |
| chr17 | 38508333 | 38508372 | RARA_9082     | + | GTGACCTATGCACCAGACGTCCCCCGCTGCAGGGTGGGATTTGCCAGGGCCACAGGAGATCGGAAGAGCGGTTTCAG       |
| chr17 | 38508770 | 38508809 | RARA_9083     | + | GTGACCTATGCACCAGACGTGCCCTGGCCCTGGCCAGCCAGCCTGCCCTGTGTCTGGGTAGAGATCGGAAGAGCGGTTTCAG  |
| chr17 | 38510769 | 38510808 | RARA_9084     | + | GTGACCTATGCACCAGACGTGGCCTGGGCTGGGGCTGGGCTGGGACGGGGTGCAGCCAGATCGGAAGAGCGGTTTCAG      |
| chr17 | 38511684 | 38511723 | RARA_9085     | + | GTGACCTATGCACCAGACGTGAGGGGTACCGGCCCCGACACCTGGCCAGGAGATCGGAAGAGCGGTTTCAG             |
| chr17 | 38512489 | 38512528 | RARA_9086     | + | GTGACCTATGCACCAGACGTACATGGACACAGCCCTCGCCCTCCGCCCGGCTTTTCTCAGATCGGAAGAGCGGTTTCAG     |
| chr5  | 36152383 | 36152422 | SKP2_9087     | + | GTGACCTATGCACCAGACGTGCAAAAAGGGGAAGAGCATGAAATGGACCCCTTAAATAAAGATCGGAAGAGCGGTTTCAG    |
| chr5  | 36153155 | 36153194 | SKP2_9088     | + | GTGACCTATGCACCAGACGTGAGGGTAAAAATGTGAGTTATGCAAGGGTGGATTTAGCTAGATCGGAAGAGCGGTTTCAG    |
| chr5  | 36163869 | 36163908 | SKP2_9089     | + | GTGACCTATGCACCAGACGTTCACCCCTTTGGCAAACGTAGGGGAGGAAGAGGAGGAAGATCGGAAGAGCGGTTTCAG      |
| chr5  | 36166775 | 36166814 | SKP2_9090     | + | GTGACCTATGCACCAGACGTAAATCCCTGGAAGAAAGACTATTTCTAAATTTTCGAGGTAGAAGATCGGAAGAGCGGTTTCAG |
| chr5  | 36168560 | 36168599 | SKP2_9091     | + | GTGACCTATGCACCAGACGTGGCAGAGTGCACAAGGCAGTTGATTTTATGTGATGAAAGATCGGAAGAGCGGTTTCAG      |
| chr5  | 36170555 | 36170594 | SKP2_9092     | + | GTGACCTATGCACCAGACGTGTGAGACTTGATTATAGACTCTTATGTCAAACGTAATAATAGATCGGAAGAGCGGTTTCAG   |
| chr5  | 36171846 | 36171885 | SKP2_9093     | + | GTGACCTATGCACCAGACGTCAAAGCTGGACACTGAGGCCTTCAACAATAATAGATGAGATCGGAAGAGCGGTTTCAG      |
| chr5  | 36177129 | 36177168 | SKP2_9094     | + | GTGACCTATGCACCAGACGTAAATGTTTATTGTTTATAGTCAAAAGTGAAGAACTTTGATTTAGATCGGAAGAGCGGTTTCAG |
| chr5  | 36177405 | 36177444 | SKP2_9095     | + | GTGACCTATGCACCAGACGTGTTTGTGTTTAAATGCTTAATAGAAGGCAGGAAACAACAGAGATCGGAAGAGCGGTTTCAG   |
| chr5  | 36182144 | 36182183 | SKP2_9096     | + | GTGACCTATGCACCAGACGTGCAGGATGGTGTCTCTTTAGAACAGGGAAATAGGCAAGATCGGAAGAGCGGTTTCAG       |
| chr5  | 36184124 | 36184163 | SKP2_9097     | + | GTGACCTATGCACCAGACGTATAAAAATGAGTGTCTAAACTAAGTTGATTTCTTTTTTAGATCGGAAGAGCGGTTTCAG     |
| chr16 | 11349346 | 11349385 | SOCS1_9098    | + | GTGACCTATGCACCAGACGTGGGCCAGCCGGAGGGTGGGCCATAGCGTCCGGGGGTGCGAGATCGGAAGAGCGGTTTCAG    |
| chr16 | 11349028 | 11349067 | SOCS1_9099    | + | GTGACCTATGCACCAGACGTACCAGGAAGTGCACCGGCTGGCCGCGCAGCCGCTCGTAGATCGGAAGAGCGGTTTCAG      |
| chr2  | 39213467 | 39213506 | SOS1_9100     | + | GTGACCTATGCACCAGACGTAAAAAGAAATAAAATACACATTTATAAATTTATGAAGTGAAGATCGGAAGAGCGGTTTCAG   |
| chr2  | 39214743 | 39214782 | SOS1_9101     | + | GTGACCTATGCACCAGACGTAAATTTTTAAGAAAAAGTCCACAGGAATTTTATTTTCATAGATCGGAAGAGCGGTTTCAG    |
| chr2  | 39216466 | 39216505 | SOS1_9102     | + | GTGACCTATGCACCAGACGTAAACAAGAAAAAGTAGATTTTTTTCTTTTCTATTGATATATTAGATCGGAAGAGCGGTTTCAG |
| chr2  | 39222539 | 39222578 | SOS1_9103     | + | GTGACCTATGCACCAGACGTATCAAAAAGAAACACAATACTTTAAACACTGTAGTAGAAAGAGATCGGAAGAGCGGTTTCAG  |
| chr2  | 39224577 | 39224616 | SOS1_9104     | + | GTGACCTATGCACCAGACGTAAATGGAATGATTTCAAGGATAAAGAAAGAAATGCAAGTAGATCGGAAGAGCGGTTTCAG    |
| chr2  | 39233681 | 39233720 | SOS1_9105     | + | GTGACCTATGCACCAGACGTAAAAAATAGGCCTAAGTTTACAAAAGAAATCAAAGCTTTAGATCGGAAGAGCGGTTTCAG    |
| chr2  | 39234345 | 39234384 | SOS1_9106     | + | GTGACCTATGCACCAGACGTAAAAAAGTGAACATAAAGTTTTAGAGTTTTTCCAATAAAAGATCGGAAGAGCGGTTTCAG    |

|       |          |          |            |   |                                                                                       |
|-------|----------|----------|------------|---|---------------------------------------------------------------------------------------|
| chr2  | 39237855 | 39237894 | SOS1_9107  | + | GTGACCTATGCACCAGACGTCAATACATAATTCTACATGACACTTTTTCTCTAATATAGAGATCGGAAGAGCGGTTTCAG      |
| chr2  | 39240715 | 39240754 | SOS1_9108  | + | GTGACCTATGCACCAGACGTAAACACAGAATTGAATTACATGGGAATCAAACATAAATGTTAGATCGGAAGAGCGGTTTCAG    |
| chr2  | 39241141 | 39241180 | SOS1_9109  | + | GTGACCTATGCACCAGACGTATAGAACAAATTAATGAAAAAGACTAATTATATCGAGTTATAGATCGGAAGAGCGGTTTCAG    |
| chr2  | 39241998 | 39242037 | SOS1_9110  | + | GTGACCTATGCACCAGACGTAAAGGAAAAATATCTTATTAACCTCTATGATTCAAAATGAAGATCGGAAGAGCGGTTTCAG     |
| chr2  | 39250377 | 39250416 | SOS1_9111  | + | GTGACCTATGCACCAGACGTGAAAAAGACATATTAGTACATAGATGACAGAAAACCTAGAGATCGGAAGAGCGGTTTCAG      |
| chr2  | 39251289 | 39251328 | SOS1_9112  | + | GTGACCTATGCACCAGACGTAAATGACAAATCTGAACCCAGTAGTACATTTTTGGATAAAAAGATCGGAAGAGCGGTTTCAG    |
| chr2  | 39262462 | 39262501 | SOS1_9113  | + | GTGACCTATGCACCAGACGTAAAGTGATTTAATTTTTTTTTTAAAGTTTACTTTTTTCAGACATAGATCGGAAGAGCGGTTTCAG |
| chr2  | 39262652 | 39262691 | SOS1_9114  | + | GTGACCTATGCACCAGACGTAAAGAAGGTAAACATAAAATTTACCATTACAAACACAAAGATCGGAAGAGCGGTTTCAG       |
| chr2  | 39278439 | 39278478 | SOS1_9115  | + | GTGACCTATGCACCAGACGTGAAAACACATTAATTCAGTGAGGCTGTATTATTATAATATAGATCGGAAGAGCGGTTTCAG     |
| chr2  | 39281975 | 39282014 | SOS1_9116  | + | GTGACCTATGCACCAGACGTAGAGATATAAAAAAGTATAATAAAATATGAAGCTTTCGTAAGATCGGAAGAGCGGTTTCAG     |
| chr2  | 39284018 | 39284057 | SOS1_9117  | + | GTGACCTATGCACCAGACGTAAAGAAAAAGCATGTTTAAACATCATATACTGTACATTTAAGATCGGAAGAGCGGTTTCAG     |
| chr2  | 39285956 | 39285995 | SOS1_9118  | + | GTGACCTATGCACCAGACGTAGGAAAAACAACTAAGCAAAAAATATTAATAATAGTGCAGATCGGAAGAGCGGTTTCAG       |
| chr2  | 39294905 | 39294944 | SOS1_9119  | + | GTGACCTATGCACCAGACGTAAAGCAAAGTAAATAAAATGTGGTTCCATATCATTAAACAGATCGGAAGAGCGGTTTCAG      |
| chr2  | 39347574 | 39347613 | SOS1_9120  | + | GTGACCTATGCACCAGACGTGGGCGCCTCTGGGCGGGGAGAGGGGCGCGCGCCGGGCAGATCGGAAGAGCGGTTTCAG        |
| chr2  | 39250049 | 39250088 | SOS1_9121  | + | GTGACCTATGCACCAGACGTGTGTCTATCTTTATCATAAATTTGTACCTTTCGCATAAAAAAGATCGGAAGAGCGGTTTCAG    |
| chr20 | 36012817 | 36012856 | SRC_9122   | + | GTGACCTATGCACCAGACGTGGGCGCGCGGGGTCCTCGCCACCTGGGGCCACGGCGGAGATCGGAAGAGCGGTTTCAG        |
| chr20 | 36014588 | 36014627 | SRC_9123   | + | GTGACCTATGCACCAGACGTCTTCCCTATTGCCCTCAGGGCTGGGTGGTGGGACTTCAAGATCGGAAGAGCGGTTTCAG       |
| chr20 | 36022407 | 36022446 | SRC_9124   | + | GTGACCTATGCACCAGACGTCTCTGGCTGCTTACCCTGCTTCCCTGGACACTGCCGGAGATCGGAAGAGCGGTTTCAG        |
| chr20 | 36024725 | 36024764 | SRC_9125   | + | GTGACCTATGCACCAGACGTCTCCGAGGGCGGAGGGCGGGCGGCAAGCCTCAGCTGCAAGATCGGAAGAGCGGTTTCAG       |
| chr20 | 36026268 | 36026307 | SRC_9126   | + | GTGACCTATGCACCAGACGTGCCCTGCCCTCGGGAGAGGCATCCACCCCCACCCCGTGAGATCGGAAGAGCGGTTTCAG       |
| chr20 | 36028708 | 36028747 | SRC_9127   | + | GTGACCTATGCACCAGACGTGGCGGCGGGGCGAGGGGCGAGGGGCACCTCCGGACAGGGCAAGATCGGAAGAGCGGTTTCAG    |
| chr20 | 36030092 | 36030131 | SRC_9128   | + | GTGACCTATGCACCAGACGTCCCTCCCGCCTCCCCACACCCCTTGGTCTCAAGCACCCAGAGATCGGAAGAGCGGTTTCAG     |
| chr20 | 36031793 | 36031832 | SRC_9129   | + | GTGACCTATGCACCAGACGTGCCAGCCGCTTCTCGGCTGGATCCTGGGCTGGTGGAGATCGGAAGAGCGGTTTCAG          |
| chr9  | 27158151 | 27158190 | TEK_9130   | + | GTGACCTATGCACCAGACGTCTTAAGTTTTGGCGAGGTAGGCCACTGAGGAACACAAAGATCGGAAGAGCGGTTTCAG        |
| chr9  | 27168614 | 27168653 | TEK_9131   | + | GTGACCTATGCACCAGACGTGTTTCATTGCTTTCCCCAGTATGATGTGAGATATCAGATAAGATCGGAAGAGCGGTTTCAG     |
| chr9  | 27172756 | 27172795 | TEK_9132   | + | GTGACCTATGCACCAGACGTAGACTTGATAAGTAAGCTGTGGATTTAAAAAGCCATCGTTAGATCGGAAGAGCGGTTTCAG     |
| chr9  | 27173371 | 27173410 | TEK_9133   | + | GTGACCTATGCACCAGACGTATCACACCTTGACAGAGGATGTTCTAGCAGGTATATAAAGATCGGAAGAGCGGTTTCAG       |
| chr9  | 27180377 | 27180416 | TEK_9134   | + | GTGACCTATGCACCAGACGTGTAACACTGTAGTCAGGGCCATGTTTCAGCATGTCTGAATGATCGGAAGAGCGGTTTCAG      |
| chr9  | 27183619 | 27183658 | TEK_9135   | + | GTGACCTATGCACCAGACGTTTCTTAATTTGCCCTTCTAAAGCATGAGATGCTTCAGTGCAGATCGGAAGAGCGGTTTCAG     |
| chr9  | 27185638 | 27185677 | TEK_9136   | + | GTGACCTATGCACCAGACGTTCCTCCAGAAAAAGGGATGTCCTTGATGCATTATGTTTAGATCGGAAGAGCGGTTTCAG       |
| chr9  | 27190699 | 27190738 | TEK_9137   | + | GTGACCTATGCACCAGACGTGACAGGATAGATGCCAGCTGGGATGTGGCACCCAGGAGAAAGATCGGAAGAGCGGTTTCAG     |
| chr9  | 27192632 | 27192671 | TEK_9138   | + | GTGACCTATGCACCAGACGTGCCAACAGGCATTTATTCATGAGCTGGGTGGGAGGGGAGAGATCGGAAGAGCGGTTTCAG      |
| chr9  | 27197608 | 27197647 | TEK_9139   | + | GTGACCTATGCACCAGACGTGATGCTGCTCCAGCCTCATCTGAGCAATAAGGGGCTACCAGATCGGAAGAGCGGTTTCAG      |
| chr9  | 27203128 | 27203167 | TEK_9140   | + | GTGACCTATGCACCAGACGTGGACAAGTATTTACATAGGATACCCTGCAGCCCTATAGAGATCGGAAGAGCGGTTTCAG       |
| chr9  | 27205074 | 27205113 | TEK_9141   | + | GTGACCTATGCACCAGACGTATCTTCCCTACTAGCTAATAAGGGGCAAGTCCAAGTACAGGCAGATCGGAAGAGCGGTTTCAG   |
| chr9  | 27206801 | 27206840 | TEK_9142   | + | GTGACCTATGCACCAGACGTGACCAGATAGATGCCAGCTGGGATGTGGCACCCAGGAGAAAGATCGGAAGAGCGGTTTCAG     |
| chr9  | 27209240 | 27209279 | TEK_9143   | + | GTGACCTATGCACCAGACGTCTTTTCTGCTTTTCTGCCAGAGTTTTTATAAACAGACAGATCGGAAGAGCGGTTTCAG        |
| chr9  | 27212906 | 27212945 | TEK_9144   | + | GTGACCTATGCACCAGACGTAGGACTTCGCTTTGGATATCTTTCTGTTGGAGTTCCTCTAGATCGGAAGAGCGGTTTCAG      |
| chr9  | 27213606 | 27213645 | TEK_9145   | + | GTGACCTATGCACCAGACGTGACACAGACATGATCGCATCCTTTCCGAGGTAATCCCTAGATCGGAAGAGCGGTTTCAG       |
| chr9  | 27217767 | 27217806 | TEK_9146   | + | GTGACCTATGCACCAGACGTCTTCTATTGCCAAGGATTTTTTTCCCTCCGAAACATAGATCGGAAGAGCGGTTTCAG         |
| chr9  | 27218826 | 27218865 | TEK_9147   | + | GTGACCTATGCACCAGACGTATGTTTATCTACCAGTGAGACTTAGGCAAAAGTGAGTGCAGATCGGAAGAGCGGTTTCAG      |
| chr9  | 27220154 | 27220193 | TEK_9148   | + | GTGACCTATGCACCAGACGTCTCATCTGGGGCTATTTTGTCTTACCTTCCCTCTGTAGATCGGAAGAGCGGTTTCAG         |
| chr9  | 27228314 | 27228353 | TEK_9149   | + | GTGACCTATGCACCAGACGTAAAGTCAGGCAGGAGATCTTAATTGGAATACCTGATGTGCAGATCGGAAGAGCGGTTTCAG     |
| chr9  | 27229241 | 27229280 | TEK_9150   | + | GTGACCTATGCACCAGACGTCTGTATACCCTCTGTTTCCCTTCACTGGCATGGGAGACCAGATCGGAAGAGCGGTTTCAG      |
| chr17 | 38545910 | 38545949 | TOP2A_9151 | + | GTGACCTATGCACCAGACGTAAAGCCCAGGTAACCTGCACATTTGTAATCTGACAACATAAGATCGGAAGAGCGGTTTCAG     |
| chr17 | 38547903 | 38547942 | TOP2A_9152 | + | GTGACCTATGCACCAGACGTAAATGGAAGGAAAATAGTACATTTAAGCAACACATGAAAGATCGGAAGAGCGGTTTCAG       |
| chr17 | 38548374 | 38548413 | TOP2A_9153 | + | GTGACCTATGCACCAGACGTAAAAAAAATCCTGACAACCAATTTCTAAATGTGTCAAGCAAGATCGGAAGAGCGGTTTCAG     |
| chr17 | 38548604 | 38548643 | TOP2A_9154 | + | GTGACCTATGCACCAGACGTAAACATATACAAAAAATCAAAGAGGGTAGTAGGAGAAACAGATCGGAAGAGCGGTTTCAG      |
| chr17 | 38549000 | 38549039 | TOP2A_9155 | + | GTGACCTATGCACCAGACGTGATAGAAATTAATCACTTTATATATAGACCCACTTTTCAGATCGGAAGAGCGGTTTCAG       |
| chr17 | 38551802 | 38551841 | TOP2A_9156 | + | GTGACCTATGCACCAGACGTGCAAAGTTAGGGTTGGATATAGAATAAATCTGAACTATGAGATCGGAAGAGCGGTTTCAG      |
| chr17 | 38552728 | 38552767 | TOP2A_9157 | + | GTGACCTATGCACCAGACGTGATATAAGAAGCAAGTTAAATGTTAACAAAAACATACAGATCGGAAGAGCGGTTTCAG        |
| chr17 | 38554904 | 38554943 | TOP2A_9158 | + | GTGACCTATGCACCAGACGTAAATACAAAATGATTAATATATGTATACAAGCAGCATGATCGGAAGAGCGGTTTCAG         |
| chr17 | 38555200 | 38555239 | TOP2A_9159 | + | GTGACCTATGCACCAGACGTAAATAAAATCTAGCTTTATTAGAAAATGTGAAACATAAACAGATCGGAAGAGCGGTTTCAG     |
| chr17 | 38555394 | 38555433 | TOP2A_9160 | + | GTGACCTATGCACCAGACGTAAAAGTAAACAGAGATAATGATTTTGTAGTAATATTTAGGAGATCGGAAGAGCGGTTTCAG     |
| chr17 | 38556330 | 38556369 | TOP2A_9161 | + | GTGACCTATGCACCAGACGTAAAAACAAGATTAGAGCCAAGAATAGACAAATTTGGCTAAACAGATCGGAAGAGCGGTTTCAG   |
| chr17 | 38556672 | 38556711 | TOP2A_9162 | + | GTGACCTATGCACCAGACGTAAATAATCTGAAGTTTCTAAATATAAGGCTTCTGAATAGAGATCGGAAGAGCGGTTTCAG      |
| chr17 | 38556926 | 38556965 | TOP2A_9163 | + | GTGACCTATGCACCAGACGTAAATAAAAAAGCATGTTTTCTAAATGTGATACTAGACAGATCGGAAGAGCGGTTTCAG        |
| chr17 | 38557344 | 38557383 | TOP2A_9164 | + | GTGACCTATGCACCAGACGTGAAAACAAGATGTTATTTTACAAAATACTGAATTTACAGATCGGAAGAGCGGTTTCAG        |

|       |           |           |            |   |                                                                                      |
|-------|-----------|-----------|------------|---|--------------------------------------------------------------------------------------|
| chr17 | 38559317  | 38559356  | TOP2A_9165 | + | GTGACCTATGCACCAGACGTA AAAAGATT CATAAGCTGAGGCTTTTACTAATACAATAAGATCGGAAGAGCGGTTTCAG    |
| chr17 | 38560536  | 38560575  | TOP2A_9166 | + | GTGACCTATGCACCAGACGTA AATAAGAGCAAACGTAAGTATCCTCAATTTAACCAATTTAGATCGGAAGAGCGGTTTCAG   |
| chr17 | 38560754  | 38560793  | TOP2A_9167 | + | GTGACCTATGCACCAGACGTA AATAGTATTACATGAGTCTACCGGTCTAAACAATGCTCAAGATCGGAAGAGCGGTTTCAG   |
| chr17 | 38561146  | 38561185  | TOP2A_9168 | + | GTGACCTATGCACCAGACGTA AGGATGAAAAGATGCTACTGGTACTAATAGGCTAATAGGAGATCGGAAGAGCGGTTTCAG   |
| chr17 | 38562756  | 38562795  | TOP2A_9169 | + | GTGACCTATGCACCAGACGTA AAAATACCAAGTTCCTTCATATAGTCTTTGTACAGGGTGTAGATCGGAAGAGCGGTTTCAG  |
| chr17 | 38562952  | 38562991  | TOP2A_9170 | + | GTGACCTATGCACCAGACGTA AACAATGACTGTGGCTTTGTGACTGTGGGGTCCCCTGTAGATCGGAAGAGCGGTTTCAG    |
| chr17 | 38563937  | 38563976  | TOP2A_9171 | + | GTGACCTATGCACCAGACGTA TATACCAAAAAAGCATCGCTTTATAAATTTGAAAAAGAAAGATCGGAAGAGCGGTTTCAG   |
| chr17 | 38564893  | 38564932  | TOP2A_9172 | + | GTGACCTATGCACCAGACGTA AAGATT CATATTAGGGATCATATTAGGGAAGAAGGGATCAGATCGGAAGAGCGGTTTCAG  |
| chr17 | 38567509  | 38567548  | TOP2A_9173 | + | GTGACCTATGCACCAGACGTA GTT GATATTAAGCCACTAAAAATGACTCATGCTTTATTAGATCGGAAGAGCGGTTTCAG   |
| chr17 | 38567718  | 38567757  | TOP2A_9174 | + | GTGACCTATGCACCAGACGTA AAAATACCAAACCTGTAAAACTCAGTATCCTCAAATTTATAAGATCGGAAGAGCGGTTTCAG |
| chr17 | 38568081  | 38568120  | TOP2A_9175 | + | GTGACCTATGCACCAGACGTA TAAAGGTAACAGTATTAAGAAGTTATTA AAAAATAGGAGATCGGAAGAGCGGTTTCAG    |
| chr17 | 38569234  | 38569273  | TOP2A_9176 | + | GTGACCTATGCACCAGACGTA AAGAATAGGAAACATGAAAAATCAAGTCATCTCACAAAAGATCGGAAGAGCGGTTTCAG    |
| chr17 | 38569555  | 38569594  | TOP2A_9177 | + | GTGACCTATGCACCAGACGTA AATATGAAACACTATTTTTATTGTTACTATCTCATTGACAAAGATCGGAAGAGCGGTTTCAG |
| chr17 | 38569888  | 38569927  | TOP2A_9178 | + | GTGACCTATGCACCAGACGTA AGATTGAAAATTTGATTTTACAACACATTAACCGAATGCGATCGGAAGAGCGGTTTCAG    |
| chr17 | 38572331  | 38572370  | TOP2A_9179 | + | GTGACCTATGCACCAGACGTA TAAAATATACATTTGTAAGAAATTAGTGTTTTAAGAAACAGATCGGAAGAGCGGTTTCAG   |
| chr17 | 38572775  | 38572814  | TOP2A_9180 | + | GTGACCTATGCACCAGACGTA GGCAAAGAAATACTGTTATTTTTATTCTATATTCATTGTTAGATCGGAAGAGCGGTTTCAG  |
| chr17 | 38573158  | 38573197  | TOP2A_9181 | + | GTGACCTATGCACCAGACGTA AAAAAAGAGAGAAGAAAGGGAATTTTTAATCATAAGTTAGATCGGAAGAGCGGTTTCAG    |
| chr17 | 38574054  | 38574093  | TOP2A_9182 | + | GTGACCTATGCACCAGACGTA GTGAAAGGGGCTCAAGAACCCTGAAAGCGACTAAACAGGCAAGATCGGAAGAGCGGTTTCAG |
| chr1  | 154130208 | 154130247 | TPM3_9183  | + | GTGACCTATGCACCAGACGTA AAGGAGAGAAGTTACAAGAAC TAGAAGTAAATTTCAAGAGATCGGAAGAGCGGTTTCAG   |
| chr1  | 154140427 | 154140466 | TPM3_9184  | + | GTGACCTATGCACCAGACGTA AGTAAGGATACTTAGGTGAGAAGGACTAGCATCAATCTAGATCGGAAGAGCGGTTTCAG    |
| chr1  | 154141870 | 154141909 | TPM3_9185  | + | GTGACCTATGCACCAGACGTA CAGGAACACAGGGAGGAATGAGGGGACAGAGTGAAGAGAGATCGGAAGAGCGGTTTCAG    |
| chr1  | 154142956 | 154142995 | TPM3_9186  | + | GTGACCTATGCACCAGACGTT ATGAAATTAGTCAGAACCAGAGATGAAGACAAAAGAAAGATCGGAAGAGCGGTTTCAG     |
| chr1  | 154143198 | 154143237 | TPM3_9187  | + | GTGACCTATGCACCAGACGTA GATAGATAAAAATTTAGATGAGAAATTAGTCACACAGGAGATCGGAAGAGCGGTTTCAG    |
| chr1  | 154143975 | 154144014 | TPM3_9188  | + | GTGACCTATGCACCAGACGTT TTAAGTACACAGGAGGAAAAGGAAAGGAAAGATCGGAAGAGCGGTTTCAG             |
| chr1  | 154144591 | 154144630 | TPM3_9189  | + | GTGACCTATGCACCAGACGTT AGTACGCGGGATGGCACAAGCCAGGTTGTGGGGAGGGAGAGATCGGAAGAGCGGTTTCAG   |
| chr1  | 154145465 | 154145504 | TPM3_9190  | + | GTGACCTATGCACCAGACGTA GATCCCAGTATAGCTTAGTGAAGCAAAGGAGCCATTTACAGATCGGAAGAGCGGTTTCAG   |
| chr1  | 154145688 | 154145727 | TPM3_9191  | + | GTGACCTATGCACCAGACGTA GACAAAAGCAATACTGACACCCTGAGGAGTGTGTCTGATAGATCGGAAGAGCGGTTTCAG   |
| chr1  | 154148735 | 154148774 | TPM3_9192  | + | GTGACCTATGCACCAGACGTA GAAAGAATGGACAAGGGAAAGCAGAGGCATGGAGAAAAGAGATCGGAAGAGCGGTTTCAG   |
| chr1  | 154155606 | 154155645 | TPM3_9193  | + | GTGACCTATGCACCAGACGTA CAGTACTGCTCCGCTCCGGTCCAGTGCCTCCTCCGCTCGAGATCGGAAGAGCGGTTTCAG   |
| chr1  | 154163798 | 154163837 | TPM3_9194  | + | GTGACCTATGCACCAGACGTC CAGAGAGTCAACACAAAAACACACAAAACAAACAAATCGAGATCGGAAGAGCGGTTTCAG   |
| chr1  | 154164505 | 154164544 | TPM3_9195  | + | GTGACCTATGCACCAGACGTT GTTGGTAGGCTCACCTGTGAACACTGGAGAACTGGAGACAGATCGGAAGAGCGGTTTCAG   |
| chr9  | 107546747 | 107546786 | ABCA1_9196 | + | GTGACCTATGCACCAGACGTA TTAAGATGGACCTTTATAAATACC ACTCAACTTGCTCATAGATCGGAAGAGCGGTTTCAG  |
| chr9  | 107547931 | 107547970 | ABCA1_9197 | + | GTGACCTATGCACCAGACGTA AAAAAATACCCAAATGGAGGATCTCCAGAAA ACTATTTAAGATCGGAAGAGCGGTTTCAG  |
| chr9  | 107548682 | 107548721 | ABCA1_9198 | + | GTGACCTATGCACCAGACGTA CAGAAAGAGGTTTTAGTTTTAGAGAGATTCTCTGTAACCAGATCGGAAGAGCGGTTTCAG   |
| chr9  | 107549268 | 107549307 | ABCA1_9199 | + | GTGACCTATGCACCAGACGTA AATAAATAAGTCTTATTTTGTGGGGGAAAAAAAATCAAAGATCGGAAGAGCGGTTTCAG    |
| chr9  | 107550346 | 107550385 | ABCA1_9200 | + | GTGACCTATGCACCAGACGTA AAAAGCACCTTGACTTTGGTCTGGCTTGGGAATTTTATCAGATCGGAAGAGCGGTTTCAG   |
| chr9  | 107550859 | 107550898 | ABCA1_9201 | + | GTGACCTATGCACCAGACGTA CAGAAA ACTACTTAGATTTAAGCAGGTAGAGATACTCTAGATCGGAAGAGCGGTTTCAG   |
| chr9  | 107553320 | 107553359 | ABCA1_9202 | + | GTGACCTATGCACCAGACGTA AGATTAAAGTTGTATAAGCAA ACTCTAAAACATGAATATAGATCGGAAGAGCGGTTTCAG  |
| chr9  | 107554290 | 107554329 | ABCA1_9203 | + | GTGACCTATGCACCAGACGTA CAAAATGTAACATTCATAAGCCTCAGT GACTCACAGCTCAGATCGGAAGAGCGGTTTCAG  |
| chr9  | 107555198 | 107555237 | ABCA1_9204 | + | GTGACCTATGCACCAGACGTA AAAACAAGAAAAATGAACTTTCAA ACTATTTTTCAGGACAGATCGGAAGAGCGGTTTCAG  |
| chr9  | 107555592 | 107555631 | ABCA1_9205 | + | GTGACCTATGCACCAGACGTA ATGCAGAGATCCGGTCAAGATGGAGGGATCAA AAAACAAAGATCGGAAGAGCGGTTTCAG  |
| chr9  | 107556802 | 107556841 | ABCA1_9206 | + | GTGACCTATGCACCAGACGTA AAAAAAAAATGGGAGGGAAGGGAGGGT GAGGGAGAGAAGATCGGAAGAGCGGTTTCAG    |
| chr9  | 107558489 | 107558528 | ABCA1_9207 | + | GTGACCTATGCACCAGACGTA CAAAAAGATAAGTGTCTACTGAGAGTCCCTGCCTCCTTAGATCGGAAGAGCGGTTTCAG    |
| chr9  | 107558716 | 107558755 | ABCA1_9208 | + | GTGACCTATGCACCAGACGTA AACAAAGACATCCAGTTACCCCTAA ATCAAATATACAAAGATCGGAAGAGCGGTTTCAG   |
| chr9  | 107560890 | 107560929 | ABCA1_9209 | + | GTGACCTATGCACCAGACGTA AAGCGTGTGAAAATCTGAGGGGCTTTTGATGCGATTTAGGAGATCGGAAGAGCGGTTTCAG  |
| chr9  | 107562280 | 107562319 | ABCA1_9210 | + | GTGACCTATGCACCAGACGTA CACTACAGTACAGTACAGTCCAGTCCCAACCCGGCTCCTAGATCGGAAGAGCGGTTTCAG   |
| chr9  | 107562876 | 107562915 | ABCA1_9211 | + | GTGACCTATGCACCAGACGTA CAGAAACCTGCCTCAGTTGTGACTGTT CACATAGATAAGGAGATCGGAAGAGCGGTTTCAG |
| chr9  | 107564451 | 107564490 | ABCA1_9212 | + | GTGACCTATGCACCAGACGTA GCCTGACATTA AACCCAGACAGTGGGGTGCACAGTATCAGATCGGAAGAGCGGTTTCAG   |
| chr9  | 107565608 | 107565647 | ABCA1_9213 | + | GTGACCTATGCACCAGACGTA AAGAAAACAAAAATCAGTTCAAAGAAAGCACTGAGCCTAAGATCGGAAGAGCGGTTTCAG   |
| chr9  | 107567012 | 107567051 | ABCA1_9214 | + | GTGACCTATGCACCAGACGTA TAAAAACCAAGCATACGGGCTTTTATAGACAAGAATGAAGATCGGAAGAGCGGTTTCAG    |
| chr9  | 107568722 | 107568761 | ABCA1_9215 | + | GTGACCTATGCACCAGACGTA AGACAGCAAGAGTAGGATTACAGAGATGGCTTGGCCTTAGATCGGAAGAGCGGTTTCAG    |
| chr9  | 107571856 | 107571895 | ABCA1_9216 | + | GTGACCTATGCACCAGACGTA GAGAGGACGCCAGCTTAGTAATTCAT TAAAACAGCAAAAGATCGGAAGAGCGGTTTCAG   |
| chr9  | 107573216 | 107573255 | ABCA1_9217 | + | GTGACCTATGCACCAGACGTA GCAGTGGAGGGGGCAGGGGGACAGCAGGAAACGGCAAGT GAGATCGGAAGAGCGGTTTCAG |
| chr9  | 107575014 | 107575053 | ABCA1_9218 | + | GTGACCTATGCACCAGACGTA CAACACTGAAGGTCACCTATTATCTTAGGTGTTTTCGGCAGATCGGAAGAGCGGTTTCAG   |
| chr9  | 107576523 | 107576562 | ABCA1_9219 | + | GTGACCTATGCACCAGACGTA AGGAAAGAAATCCATACTTTATTTATTTACAACAAAACAGATCGGAAGAGCGGTTTCAG    |
| chr9  | 107576767 | 107576806 | ABCA1_9220 | + | GTGACCTATGCACCAGACGTA GAGAGATGAGAACAATATAAGCACAACATTACGAGAGTAGATCGGAAGAGCGGTTTCAG    |
| chr9  | 107578637 | 107578676 | ABCA1_9221 | + | GTGACCTATGCACCAGACGTA GAATGCAAGATGGCTCACTCAACTCAGAGGGGCTTCAGATCGGAAGAGCGGTTTCAG      |
| chr9  | 107579696 | 107579735 | ABCA1_9222 | + | GTGACCTATGCACCAGACGTA AAGAGGAGGTGAGAACGGGTACGGGACGGAGCAAGGCAGAAAGATCGGAAGAGCGGTTTCAG |

|       |           |           |            |   |                                                                                          |
|-------|-----------|-----------|------------|---|------------------------------------------------------------------------------------------|
| chr9  | 107581175 | 107581214 | ABCA1_9223 | + | GTGACCTATGCACCAGACGTCAAACACAAGGATGTGGGACAGGTGAGGCCCTCTCAGTTCTAGATCGGAAGAGCGGTTTCAG       |
| chr9  | 107582015 | 107582054 | ABCA1_9224 | + | GTGACCTATGCACCAGACGTACAGAGCAAAGCAAACTCCAGACCAGCCCCAGACAGTGAAGATCGGAAGAGCGGTTTCAG         |
| chr9  | 107582361 | 107582400 | ABCA1_9225 | + | GTGACCTATGCACCAGACGTGGAGGCAGGTCTGCTGGGCCCTACTGGATACCCAGAAAGATCGGAAGAGCGGTTTCAG           |
| chr9  | 107583798 | 107583837 | ABCA1_9226 | + | GTGACCTATGCACCAGACGTAAATTTAGAAGTACAGAAGTCAAGGTTGACCTACCCCTAAAGATCGGAAGAGCGGTTTCAG        |
| chr9  | 107584959 | 107584998 | ABCA1_9227 | + | GTGACCTATGCACCAGACGTAGAGAAGACAGAAATGAACCCACAGAAAGCACTGAGGAGTAGATCGGAAGAGCGGTTTCAG        |
| chr9  | 107586870 | 107586909 | ABCA1_9228 | + | GTGACCTATGCACCAGACGTAGCAGCAGGTATGACCCAAGCTCAGCATATCCCAGTATTCAGATCGGAAGAGCGGTTTCAG        |
| chr9  | 107588179 | 107588218 | ABCA1_9229 | + | GTGACCTATGCACCAGACGTGAGGAAAGTACAGTACCTTCCATTTCTGGTTCAGTCTCATTTAGATCGGAAGAGCGGTTTCAG      |
| chr9  | 107589461 | 107589500 | ABCA1_9230 | + | GTGACCTATGCACCAGACGTAGAGACACATCAAATGTGCTGCCTCAACAATCCCAAGCACAGATCGGAAGAGCGGTTTCAG        |
| chr9  | 107591430 | 107591469 | ABCA1_9231 | + | GTGACCTATGCACCAGACGTCAAGGAAGGACAAGGGGAGAAAGAAAGACACACGTGAGCCAGATCGGAAGAGCGGTTTCAG        |
| chr9  | 107594119 | 107594158 | ABCA1_9232 | + | GTGACCTATGCACCAGACGTAAACAGCCTTCATGAGAAGCTTGGCAGCCAGACAACAAGCAGATCGGAAGAGCGGTTTCAG        |
| chr9  | 107595063 | 107595102 | ABCA1_9233 | + | GTGACCTATGCACCAGACGTAGTGAGAAAAGTACAAGTAGTAAACACCAACTAAATCTTGAAGATCGGAAGAGCGGTTTCAG       |
| chr9  | 107599388 | 107599427 | ABCA1_9234 | + | GTGACCTATGCACCAGACGTGTGGGGAGCCAGGACCCGACGAAAAAGGAGGAGAAGCACAAGATCGGAAGAGCGGTTTCAG        |
| chr9  | 107599859 | 107599898 | ABCA1_9235 | + | GTGACCTATGCACCAGACGTGAGGAGAGACAATACTCATATGTCATGTCATATACTGATAGATCGGAAGAGCGGTTTCAG         |
| chr9  | 107607861 | 107607900 | ABCA1_9236 | + | GTGACCTATGCACCAGACGTAAAGAAAACCTTTGTTTCTGAATTCAAATGTAAACCTGAAAAGATCGGAAGAGCGGTTTCAG       |
| chr9  | 107620990 | 107621029 | ABCA1_9237 | + | GTGACCTATGCACCAGACGTTCATGCAAAGAGAGACAAGCACAAGAGGATTATGAAGATAGATCGGAAGAGCGGTTTCAG         |
| chr9  | 107624092 | 107624131 | ABCA1_9238 | + | GTGACCTATGCACCAGACGTATAGTGTATTTATTTTATTTAGTAAAGTAACTCAAAAAAAGATCGGAAGAGCGGTTTCAG         |
| chr9  | 107645449 | 107645488 | ABCA1_9239 | + | GTGACCTATGCACCAGACGTTGCAAGAAAAGGCCGAAAGCTTTAGCTAGGCCAAGCTGCTAGATCGGAAGAGCGGTTTCAG        |
| chr9  | 107646860 | 107646899 | ABCA1_9240 | + | GTGACCTATGCACCAGACGTGAGGAGTAGAAAACACAGGAGGAGAAACATAATTCCCTGAGATCGGAAGAGCGGTTTCAG         |
| chr9  | 107651487 | 107651526 | ABCA1_9241 | + | GTGACCTATGCACCAGACGTAAAGATAGAACTGTAAATTTAAAAATAATATGGATAAGATCGGAAGAGCGGTTTCAG            |
| chr9  | 107665971 | 107666010 | ABCA1_9242 | + | GTGACCTATGCACCAGACGTCCAGCACCCCCAGCGTGTGGCTCGGGAGCCCTGGAAGGCAAGATCGGAAGAGCGGTTTCAG        |
| chr19 | 1453152   | 1453191   | APC2_9243  | + | GTGACCTATGCACCAGACGTACATGGAGGAGGTGGGCTAGGGTCCCGGGTGGTGCCCCAGATCGGAAGAGCGGTTTCAG          |
| chr19 | 1453347   | 1453386   | APC2_9244  | + | GTGACCTATGCACCAGACGTGGGCCACCCGACAGAGGGAGTGGGGGAGGCTGGGGGAAAAGATCGGAAGAGCGGTTTCAG         |
| chr19 | 1453621   | 1453660   | APC2_9245  | + | GTGACCTATGCACCAGACGTGTGGGAACCCAGCCCTCGGCGAGCTGGGATGACTCGGTTCAGATCGGAAGAGCGGTTTCAG        |
| chr19 | 1455267   | 1455306   | APC2_9246  | + | GTGACCTATGCACCAGACGTGCGGGAGCCAGGGGACCGCCGCGCCGACTCGAAGGTGAGATCGGAAGAGCGGTTTCAG           |
| chr19 | 1455510   | 1455549   | APC2_9247  | + | GTGACCTATGCACCAGACGTGGGCGGGGTGGCGCGCGGTAGGCGGGGCCCTGCGCCAGTAGATCGGAAGAGCGGTTTCAG         |
| chr19 | 1456163   | 1456202   | APC2_9248  | + | GTGACCTATGCACCAGACGTGGGCAGAGCCAGGGACCAGGGTGGTGTGCGGCCAGGCAGAGATCGGAAGAGCGGTTTCAG         |
| chr19 | 1456414   | 1456453   | APC2_9249  | + | GTGACCTATGCACCAGACGTGGGTGAAACGGGGCTGGCGCAGCTGTCTGGGCTGGAAGGAGATCGGAAGAGCGGTTTCAG         |
| chr19 | 1457253   | 1457292   | APC2_9250  | + | GTGACCTATGCACCAGACGTGGCCTGTGGGGCCCTCCGCGCAATTAACGTGCAGCTAGAGATCGGAAGAGCGGTTTCAG          |
| chr19 | 1458070   | 1458109   | APC2_9251  | + | GTGACCTATGCACCAGACGTGAGTCCCTTGGGAAGCCCTCCAGCCCCGAACAGGTAGATCGGAAGAGCGGTTTCAG             |
| chr19 | 1460330   | 1460369   | APC2_9252  | + | GTGACCTATGCACCAGACGTGCAGTGGGTGGGCTGGCCTTCTCCATCCAGTCTTCCAGAGATCGGAAGAGCGGTTTCAG          |
| chr19 | 1460867   | 1460906   | APC2_9253  | + | GTGACCTATGCACCAGACGTGGGTGCTGGGAAAGCCTTCCAGGGTGTCCCTGATAGGCAGAGATCGGAAGAGCGGTTTCAG        |
| chr19 | 1461163   | 1461202   | APC2_9254  | + | GTGACCTATGCACCAGACGTGGTGGCGGCGAGGATGCTTCTCAGTCACTGGAAGGAGAAGATCGGAAGAGCGGTTTCAG          |
| chr19 | 1462187   | 1462226   | APC2_9255  | + | GTGACCTATGCACCAGACGTACCCCCCTACCCGACACACAGGACGCTGCGCTCGGGGCGGGAGATCGGAAGAGCGGTTTCAG       |
| chr19 | 1470223   | 1470262   | APC2_9256  | + | GTGACCTATGCACCAGACGTGGGCTTCTGGAACGTTCTCTCCCGCCCTGCGGGCGGGTAGATCGGAAGAGCGGTTTCAG          |
| chr19 | 1465624   | 1465663   | APC2_9257  | + | GTGACCTATGCACCAGACGTCCGGCTGCTTTGACGACAGCAGTACCGGCTGACCCCTGATCCCTGCGAGATCGGAAGAGCGGTTTCAG |
| chr19 | 1466084   | 1466123   | APC2_9258  | + | GTGACCTATGCACCAGACGTGAGCGGAGTGGCAGCGACGGTACTGCCACGCGAACAATAGATCGGAAGAGCGGTTTCAG          |
| chr19 | 1466544   | 1466583   | APC2_9259  | + | GTGACCTATGCACCAGACGTCCAGGCCCCAGCGAGGGTGGTGCCTGGATGACAGTACTAGATCGGAAGAGCGGTTTCAG          |
| chr19 | 1467004   | 1467043   | APC2_9260  | + | GTGACCTATGCACCAGACGTGCTACGTGAAGCGTTCCTGGACATCGCCGACTGCCGGGAAGATCGGAAGAGCGGTTTCAG         |
| chr19 | 1467464   | 1467503   | APC2_9261  | + | GTGACCTATGCACCAGACGTCTGCACGTGACTCCGCGGAGGGCACGCGGTTCAACTTCTAGATCGGAAGAGCGGTTTCAG         |
| chr19 | 1467924   | 1467963   | APC2_9262  | + | GTGACCTATGCACCAGACGTCCGACGGCCGGAAGGAGCCCTCCGCCGTTCAAGGCTGAGATCGGAAGAGCGGTTTCAG           |
| chr19 | 1468384   | 1468423   | APC2_9263  | + | GTGACCTATGCACCAGACGTAATTGTACGTGCTGACAGGACAGGACGCTGCCACGCGAGATCGGAAGAGCGGTTTCAG           |
| chr19 | 1468844   | 1468883   | APC2_9264  | + | GTGACCTATGCACCAGACGTGACCTCGGAGCTGGCGACGCTGAGCCAGCCCCCAGAAGCAGATCGGAAGAGCGGTTTCAG         |
| chr19 | 1469304   | 1469343   | APC2_9265  | + | GTGACCTATGCACCAGACGTCCGGGCTTGGCGGCCCGGCTCCGAGCTGTCTCGGCCGAGATCGGAAGAGCGGTTTCAG           |
| chr19 | 1469764   | 1469803   | APC2_9266  | + | GTGACCTATGCACCAGACGTCCCACATCTGCGCAGCAGCTTCCCGCCACGCGCCTGCCAGATCGGAAGAGCGGTTTCAG          |
| chr20 | 54945407  | 54945446  | AURKA_9267 | + | GTGACCTATGCACCAGACGTACAATGATAAAATACAAAACACAGGTTAGAGAGATCAGATCGGAAGAGCGGTTTCAG            |
| chr20 | 54945726  | 54945765  | AURKA_9268 | + | GTGACCTATGCACCAGACGTAGGGAGGCTCAGTTGATGCTCTCGTTTTATGATCACAGATCGGAAGAGCGGTTTCAG            |
| chr20 | 54948623  | 54948662  | AURKA_9269 | + | GTGACCTATGCACCAGACGTAATATTGAAAGCCTATGTTTTAGATTTATATAACACAAGAGATCGGAAGAGCGGTTTCAG         |
| chr20 | 54956638  | 54956677  | AURKA_9270 | + | GTGACCTATGCACCAGACGTGGATAAACATTCTAACACTTGGTTTGGAGCTCACAGAAGAAGATCGGAAGAGCGGTTTCAG        |
| chr20 | 54958243  | 54958282  | AURKA_9271 | + | GTGACCTATGCACCAGACGTTTTGAACACTTTAGAATGTGAAGAAAAACAAGCTTTTCTAAGATCGGAAGAGCGGTTTCAG        |
| chr20 | 54959391  | 54959430  | AURKA_9272 | + | GTGACCTATGCACCAGACGTTAAGTAAAAACCTGTTTTAGATAAATATATAGGATAAAGATCGGAAGAGCGGTTTCAG           |
| chr20 | 54961600  | 54961639  | AURKA_9273 | + | GTGACCTATGCACCAGACGTAGAGAAAATAAATCTTGGCATTATGAAAGCAAAGATAGATCGGAAGAGCGGTTTCAG            |
| chr20 | 54963264  | 54963303  | AURKA_9274 | + | GTGACCTATGCACCAGACGTAAGAAAAAGAAAGAACTTTAATTTGAACAAAAGCAACTGCAGATCGGAAGAGCGGTTTCAG        |
| chr6  | 41903856  | 41903895  | CCND3_9275 | + | GTGACCTATGCACCAGACGTGGGAGAAGAGTGAAGGAGCAAACACTCCCCCATAGCATCTAGATCGGAAGAGCGGTTTCAG        |
| chr6  | 41904430  | 41904469  | CCND3_9276 | + | GTGACCTATGCACCAGACGTTAATCTTGGAGAGGAGAAAGGGAACCATGAGAGAAGGAAAGATCGGAAGAGCGGTTTCAG         |
| chr6  | 41904444  | 41904483  | CCND3_9277 | + | GTGACCTATGCACCAGACGTAGGAAAGGGAAACCATGAGAGAAGGAAACCTGAAGGATAACAGATCGGAAGAGCGGTTTCAG       |
| chr6  | 41905143  | 41905182  | CCND3_9278 | + | GTGACCTATGCACCAGACGTGGGGAAAGGGTGGGCTCAGTGGCTGGAGAAGTGAAGAGGAAGATCGGAAGAGCGGTTTCAG        |
| chr6  | 41908289  | 41908328  | CCND3_9279 | + | GTGACCTATGCACCAGACGTAAGACTTCTCAGCAGCTGCTCCTCACATACCTGGGAGATCGGAAGAGCGGTTTCAG             |
| chr6  | 41908334  | 41908373  | CCND3_9280 | + | GTGACCTATGCACCAGACGTGCGCACAGTCTGCTGGGCTGAGGCTGGGGAACACAGAGATCGGAAGAGCGGTTTCAG            |



|       |           |           |              |   |                                                                                        |
|-------|-----------|-----------|--------------|---|----------------------------------------------------------------------------------------|
| chr6  | 41909398  | 41909437  | CCND3_9281   | + | GTGACCTATGCACCAGACGTCGAACAGGCAGGGCGGGAGTGCGGGCTCGCGAGTCCCAAGAGATCGGAAGAGCGGTTTCAG      |
| chrX  | 135730574 | 135730613 | CD40LG_9282  | + | GTGACCTATGCACCAGACGTCACCAAGCCTTTATTAACATAAATTTGGGGTCTTACTAATAGATCGGAAGAGCGGTTTCAG      |
| chrX  | 135732567 | 135732606 | CD40LG_9283  | + | GTGACCTATGCACCAGACGTTAATTACTGGTAAAAGTGTCAATTGAAATATTTACTACATAGATCGGAAGAGCGGTTTCAG      |
| chrX  | 135736600 | 135736639 | CD40LG_9284  | + | GTGACCTATGCACCAGACGTTATTTGCTAATTTCTATGAATGCCTAAAACTAAAAGGAAAGATCGGAAGAGCGGTTTCAG       |
| chrX  | 135738588 | 135738627 | CD40LG_9285  | + | GTGACCTATGCACCAGACGTCAGCATCTGAGCGGTAGCCACCCAAGGGGAAAAGGCTGGGAAGATCGGAAGAGCGGTTTCAG     |
| chrX  | 135741585 | 135741624 | CD40LG_9286  | + | GTGACCTATGCACCAGACGTTCTTGAGCCTGTGGTGGAGCTGACGCTGGGAGTCTTTCATAAGATCGGAAGAGCGGTTTCAG     |
| chr13 | 28537517  | 28537556  | CDX2_9287    | + | GTGACCTATGCACCAGACGTTAAAGGTGGAGAAAAGCATTGTGGTGAAGATGTGAGGGAAAGATCGGAAGAGCGGTTTCAG      |
| chr13 | 28539163  | 28539202  | CDX2_9288    | + | GTGACCTATGCACCAGACGTAGGAGAAAGTGAAGGGCTGAGAACTGCAAGGCAGCCCATCAGAGATCGGAAGAGCGGTTTCAG    |
| chr13 | 28543154  | 28543193  | CDX2_9289    | + | GTGACCTATGCACCAGACGTGCCGGGAGCAGACCTCACCATGCTGCCTGGGGACCGACGAGATCGGAAGAGCGGTTTCAG       |
| chr15 | 51503264  | 51503303  | CYP19A1_9290 | + | GTGACCTATGCACCAGACGTGATCAGACAGTTAGCCAGAAATATAAAGGCTAGAGTCACTAGATCGGAAGAGCGGTTTCAG      |
| chr15 | 51504769  | 51504808  | CYP19A1_9291 | + | GTGACCTATGCACCAGACGTAGATAAAAGGAACAAAGAAAGGTAAATGTTAGTTCATCTGAGATCGGAAGAGCGGTTTCAG      |
| chr15 | 51507440  | 51507479  | CYP19A1_9292 | + | GTGACCTATGCACCAGACGTGGAAGATGGGAAAAATTTGGAAAACTGAACTCAAAGTTTCAAGATCGGAAGAGCGGTTTCAG     |
| chr15 | 51508025  | 51508064  | CYP19A1_9293 | + | GTGACCTATGCACCAGACGTAGTCAAAAATTTGCTATTTTTACTAGTATTAGACATCTAAGATCGGAAGAGCGGTTTCAG       |
| chr15 | 51510863  | 51510902  | CYP19A1_9294 | + | GTGACCTATGCACCAGACGTAAAAAACACACATACACAAGAAAGAGCAGTTGAGCAAATAGATCGGAAGAGCGGTTTCAG       |
| chr15 | 51514733  | 51514772  | CYP19A1_9295 | + | GTGACCTATGCACCAGACGTACATCAGAGAATCAGCCATCAGAACTCCAGGGCACACAAGATCGGAAGAGCGGTTTCAG        |
| chr15 | 51520141  | 51520180  | CYP19A1_9296 | + | GTGACCTATGCACCAGACGTAGGAAACTTTGGTGTCAATTTTTAAGGGTCAAGGAACTCAGATCGGAAGAGCGGTTTCAG       |
| chr15 | 51529217  | 51529256  | CYP19A1_9297 | + | GTGACCTATGCACCAGACGTTGTACAGACATAAGCAACATCTTAGTACACCAAAAATGAGATCGGAAGAGCGGTTTCAG        |
| chr15 | 51535120  | 51535159  | CYP19A1_9298 | + | GTGACCTATGCACCAGACGTTGACCTGACAGAGGGGCCAATTTAGACTCCTGTGGAAATCAAGATCGGAAGAGCGGTTTCAG     |
| chr20 | 31367962  | 31368001  | DNMT3B_9299  | + | GTGACCTATGCACCAGACGTGGCTATGGGGGCGAGCTGGGTGGGTACTTGGGCAAGAGAGATCGGAAGAGCGGTTTCAG        |
| chr20 | 31368282  | 31368321  | DNMT3B_9300  | + | GTGACCTATGCACCAGACGTAGTGGGGACTGGGGTGGTGTACAGGCGTGACATAGTGAAGCAGATCGGAAGAGCGGTTTCAG     |
| chr20 | 31369231  | 31369270  | DNMT3B_9301  | + | GTGACCTATGCACCAGACGTTGCTCTCCCTTTTTAGGGCTCAGGGACTTTGCTTTGGCAGATCGGAAGAGCGGTTTCAG        |
| chr20 | 31372676  | 31372715  | DNMT3B_9302  | + | GTGACCTATGCACCAGACGTACACCTCGAGCCAAAGCACTTGTGGCCAACACTCTACATAAGATCGGAAGAGCGGTTTCAG      |
| chr20 | 31374444  | 31374483  | DNMT3B_9303  | + | GTGACCTATGCACCAGACGTGAGTCCCAAGCCTCAGGCGAGTCTCTAACTGGGAGAGATCGGAAGAGCGGTTTCAG           |
| chr20 | 31375268  | 31375307  | DNMT3B_9304  | + | GTGACCTATGCACCAGACGTGAGGGGCTCCTCGCCAGGGTGACTGAGGACCTGAACACGAGATCGGAAGAGCGGTTTCAG       |
| chr20 | 31376829  | 31376868  | DNMT3B_9305  | + | GTGACCTATGCACCAGACGTGGAAGGGCAAGGGGTTCTGCAGGCTGAGGCTGTCCCTGCAGATCGGAAGAGCGGTTTCAG       |
| chr20 | 31379525  | 31379564  | DNMT3B_9306  | + | GTGACCTATGCACCAGACGTGAGGGAAATGAGGGCTAAGCCCTGAGAGCAGGGATGAAGAGATCGGAAGAGCGGTTTCAG       |
| chr20 | 31380587  | 31380626  | DNMT3B_9307  | + | GTGACCTATGCACCAGACGTGCCCATGGCAGCACCCGCTGCCTCTGCTGGTGGGACCAAGATCGGAAGAGCGGTTTCAG        |
| chr20 | 31381412  | 31381451  | DNMT3B_9308  | + | GTGACCTATGCACCAGACGTCCTGTCCTTTGACTGTGCCCTGTTTCTATGCACCTTCTTAGATCGGAAGAGCGGTTTCAG       |
| chr20 | 31383351  | 31383390  | DNMT3B_9309  | + | GTGACCTATGCACCAGACGTGGTACTGGGATCTGGACAGATGGGAGGAGCAGCTGCAGATCGGAAGAGCGGTTTCAG          |
| chr20 | 31383511  | 31383550  | DNMT3B_9310  | + | GTGACCTATGCACCAGACGTCCTCCCTCCCATGTCATCCCTCCACACCTGGCTAGGGCTCAGATCGGAAGAGCGGTTTCAG      |
| chr20 | 31384686  | 31384725  | DNMT3B_9311  | + | GTGACCTATGCACCAGACGTCTACTACTGCCCTGGACCTTCCCTCCCTTGCCTCCTCTAAAGATCGGAAGAGCGGTTTCAG      |
| chr20 | 31385116  | 31385155  | DNMT3B_9312  | + | GTGACCTATGCACCAGACGTGGCCCTGTGGGGTGGATGTGGGTGGGCCCCCAAGGCTCCTAGATCGGAAGAGCGGTTTCAG      |
| chr20 | 31386460  | 31386499  | DNMT3B_9313  | + | GTGACCTATGCACCAGACGTGGCTCCCGCCTCTACCACCACAGATCCCAAGGGGCACAGGGAGATCGGAAGAGCGGTTTCAG     |
| chr20 | 31387145  | 31387184  | DNMT3B_9314  | + | GTGACCTATGCACCAGACGTGGAACTGGAGACACTGTCTCGTGCACAACAGGGTAAGATCGGAAGAGCGGTTTCAG           |
| chr20 | 31388115  | 31388154  | DNMT3B_9315  | + | GTGACCTATGCACCAGACGTTTCTACTCTCGCGGCTCATCTCTTCTCTTTTTCCACAGATCGGAAGAGCGGTTTCAG          |
| chr20 | 31388742  | 31388781  | DNMT3B_9316  | + | GTGACCTATGCACCAGACGTTTCTCTCTGGCAGTCCCTGGAGAGCCTATGTCACCTGACCAGATCGGAAGAGCGGTTTCAG      |
| chr20 | 31389243  | 31389282  | DNMT3B_9317  | + | GTGACCTATGCACCAGACGTCTGGGGACCTGATTGTCACAGACAGCCAGGGCAGGAAAGAGATCGGAAGAGCGGTTTCAG       |
| chr20 | 31390287  | 31390326  | DNMT3B_9318  | + | GTGACCTATGCACCAGACGTGCTCTTAGTGGGTGAGTAAACAGCCAAAGTTAAATATGTGAAGATCGGAAGAGCGGTTTCAG     |
| chr20 | 31393224  | 31393263  | DNMT3B_9319  | + | GTGACCTATGCACCAGACGTCTGTGGCCCTCGGAAAAATGCACCTTGGTGACCTCCAAGTAGATCGGAAGAGCGGTTTCAG      |
| chr20 | 31394144  | 31394183  | DNMT3B_9320  | + | GTGACCTATGCACCAGACGTTGCACTTGGAGAGGAAACTGTGTAGATCAAAACACAAAAGATCGGAAGAGCGGTTTCAG        |
| chr20 | 31395720  | 31395759  | DNMT3B_9321  | + | GTGACCTATGCACCAGACGTTGCCAAAGCCACTGGGCTGTGTGCAGAGCCAGGACCAAGATCGGAAGAGCGGTTTCAG         |
| chr19 | 45912994  | 45913033  | ERCC1_9322   | + | GTGACCTATGCACCAGACGTGGGAGAAAAAATGAGGAACCAGTCAATAAGGAGCTGTTAGATCGGAAGAGCGGTTTCAG        |
| chr19 | 45917014  | 45917053  | ERCC1_9323   | + | GTGACCTATGCACCAGACGTAAAGCGAGGGGTCAGGGCAGTTGAGCACAAAAGCCTCCCAGATCGGAAGAGCGGTTTCAG       |
| chr19 | 45917303  | 45917342  | ERCC1_9324   | + | GTGACCTATGCACCAGACGTTGGAGGCGAGGAGTGTGTCCGGAAGAAAGAAAGGCCAGCAAGAAGATCGGAAGAGCGGTTTCAG   |
| chr19 | 45918229  | 45918268  | ERCC1_9325   | + | GTGACCTATGCACCAGACGTAGGATACAGGGCAGCCGGGAGGTGAGGTATCAGATTATAGAGATCGGAAGAGCGGTTTCAG      |
| chr19 | 45922466  | 45922505  | ERCC1_9326   | + | GTGACCTATGCACCAGACGTACAGGACCGGGGTCAGGAGGTTGAGGAGTCTCAGTCTCTTAAGACAGATCGGAAGAGCGGTTTCAG |
| chr19 | 45923696  | 45923735  | ERCC1_9327   | + | GTGACCTATGCACCAGACGTACGAAGGGCAGAAGCCATCAATAGGGATGACCCTTGATAAAGATCGGAAGAGCGGTTTCAG      |
| chr19 | 45924662  | 45924701  | ERCC1_9328   | + | GTGACCTATGCACCAGACGTAAAGGGAGTTTGCAGGGGACTGGTTGGGTGAGCAGAGGAAGATCGGAAGAGCGGTTTCAG       |
| chr19 | 45926643  | 45926682  | ERCC1_9329   | + | GTGACCTATGCACCAGACGTAAAGGGAAGGTGCCAGGAGCGAGTGAGCCACTGGCGTCTAAGATCGGAAGAGCGGTTTCAG      |
| chr16 | 14014240  | 14014279  | ERCC4_9330   | + | GTGACCTATGCACCAGACGTGCTGGCGCGGGAGTGAGGGGACTCCGAGAGTGTGAGGGCAGATCGGAAGAGCGGTTTCAG       |
| chr16 | 14016079  | 14016118  | ERCC4_9331   | + | GTGACCTATGCACCAGACGTGAAATCTTATATAGTATGTAATTTGTACTTTTTTTAGATCGGAAGAGCGGTTTCAG           |
| chr16 | 14020624  | 14020663  | ERCC4_9332   | + | GTGACCTATGCACCAGACGTTTATGTGCAAAAATATGATGACATATTGTGCATCTTTGTAGATCGGAAGAGCGGTTTCAG       |
| chr16 | 14022103  | 14022142  | ERCC4_9333   | + | GTGACCTATGCACCAGACGTTCCTTTTAAGCACAGTTTATGTTGTAATTTAAAGAAAGATCGGAAGAGCGGTTTCAG          |
| chr16 | 14024758  | 14024797  | ERCC4_9334   | + | GTGACCTATGCACCAGACGTAAAACTAATAATATCTAAGAGCTGATTTGAATAAGTAGATCGGAAGAGCGGTTTCAG          |
| chr16 | 14026153  | 14026192  | ERCC4_9335   | + | GTGACCTATGCACCAGACGTGGGTTAAGTCTTTAAATGTGTTTTTATTTCCGATTTGGAGATCGGAAGAGCGGTTTCAG        |
| chr16 | 14028170  | 14028209  | ERCC4_9336   | + | GTGACCTATGCACCAGACGTAGGAGATGAAAACATTTGCTTCCAAAATCTATCAAAATGAGAGATCGGAAGAGCGGTTTCAG     |
| chr16 | 14029611  | 14029650  | ERCC4_9337   | + | GTGACCTATGCACCAGACGTAAAGATACAGACTTTCAGTTGCACAGTTCTTTAGGATTTAAGATCGGAAGAGCGGTTTCAG      |
| chr16 | 14031726  | 14031765  | ERCC4_9338   | + | GTGACCTATGCACCAGACGTGAAAATCAGTATGAAAGCCCAACTACTATTGAAACCTTAGATCGGAAGAGCGGTTTCAG        |

|       |           |           |            |   |                                                                                     |
|-------|-----------|-----------|------------|---|-------------------------------------------------------------------------------------|
| chr16 | 14038703  | 14038742  | ERCC4_9339 | + | GTGACCTATGCACCAGACGTCACTTTGTGTCAGGCACCTCCATTGCTGCAAAAGGGGGCTGTAGATCGGAAGAGCGGTTTCAG |
| chr16 | 14042215  | 14042254  | ERCC4_9340 | + | GTGACCTATGCACCAGACGTCTGTTTTCTTATCCCATGCCTGTACTTTTTAGCCGCTCCTAGATCGGAAGAGCGGTTTCAG   |
| chr16 | 14029312  | 14029351  | ERCC4_9341 | + | GTGACCTATGCACCAGACGTGAGATGTGCGAGGAAGGATATCGTCGAGAAATAAGCAGTAGAGATCGGAAGAGCGGTTTCAG  |
| chr16 | 14041848  | 14041887  | ERCC4_9342 | + | GTGACCTATGCACCAGACGTGGATTCTCTGGTGCCCTCTCCTCATGCAACGGCGGAGTAGATCGGAAGAGCGGTTTCAG     |
| chr17 | 41606122  | 41606161  | ETV4_9343  | + | GTGACCTATGCACCAGACGTAGAGAAGGTCTGGTCAGCCTGGCTACGCCGCCAGCCTTTGAGATCGGAAGAGCGGTTTCAG   |
| chr17 | 41606615  | 41606654  | ETV4_9344  | + | GTGACCTATGCACCAGACGTAAACAGTTTTGGGTAGAGTGCTACCTTGGCAGAGGAAAGATCGGAAGAGCGGTTTCAG      |
| chr17 | 41607055  | 41607094  | ETV4_9345  | + | GTGACCTATGCACCAGACGTGAAAATAGGAGGTGGGGTGTGGTCTTTTTGGTCCCCAGATCGGAAGAGCGGTTTCAG       |
| chr17 | 41607331  | 41607370  | ETV4_9346  | + | GTGACCTATGCACCAGACGTAAATTGGGGTTGCTCAGATCTGGGGTTTACCAGATGAGAAGATCGGAAGAGCGGTTTCAG    |
| chr17 | 41607560  | 41607599  | ETV4_9347  | + | GTGACCTATGCACCAGACGTAGAAGGGGTGATGTGAGAAGTGGCTTGGGGTGGAGCTCGAAGATCGGAAGAGCGGTTTCAG   |
| chr17 | 41610318  | 41610357  | ETV4_9348  | + | GTGACCTATGCACCAGACGTGGATGGAGAAGGAGAGAAGAACTTTAAATTAATCCAGATCGGAAGAGCGGTTTCAG        |
| chr17 | 41610727  | 41610766  | ETV4_9349  | + | GTGACCTATGCACCAGACGTGAAGGAGACAGGGGTGAGGGGCGAGAGAAGCTGGAAGAACAGATCGGAAGAGCGGTTTCAG   |
| chr17 | 41611364  | 41611403  | ETV4_9350  | + | GTGACCTATGCACCAGACGTGGAGGGGACAGAGCAGGCCAGGCCTGCACACAAGAGGAGATCGGAAGAGCGGTTTCAG      |
| chr17 | 41613858  | 41613897  | ETV4_9351  | + | GTGACCTATGCACCAGACGTAAAGTCAGAGGTGAGTTTGGGGCGAGCCCTGGTTGTCTCCAGATCGGAAGAGCGGTTTCAG   |
| chr17 | 41622401  | 41622440  | ETV4_9352  | + | GTGACCTATGCACCAGACGTAAATAGTGAATTGGAGGTGAGGTGGAGGGGACGGTAAGAGAGATCGGAAGAGCGGTTTCAG   |
| chr17 | 41622746  | 41622785  | ETV4_9353  | + | GTGACCTATGCACCAGACGTGGGGAGAATGCCCGGAGTCACCTGAGGCGCTTAGTCTAGATCGGAAGAGCGGTTTCAG      |
| chr17 | 41622996  | 41623035  | ETV4_9354  | + | GTGACCTATGCACCAGACGTCTCCGCCGACGGCCGGGGCCCCAAGCGGGGGCCGAGAAGATCGGAAGAGCGGTTTCAG      |
| chr15 | 91428499  | 91428538  | FES_9355   | + | GTGACCTATGCACCAGACGTATGGACTCTGGTGGTGTGGTGTATCGCTTCTCCTAGATCGGAAGAGCGGTTTCAG         |
| chr15 | 91428826  | 91428865  | FES_9356   | + | GTGACCTATGCACCAGACGTAGACTGGGGCTGGGTCATTCTGTCTAAATTTTGAGCCAGATCGGAAGAGCGGTTTCAG      |
| chr15 | 91430298  | 91430337  | FES_9357   | + | GTGACCTATGCACCAGACGTCCCTTGTCTGGCAGGGAGGGAATCCGAAGCCAGTGCTGACAGATCGGAAGAGCGGTTTCAG   |
| chr15 | 91430611  | 91430650  | FES_9358   | + | GTGACCTATGCACCAGACGTAGCCCGTCCCCTGGCCCCACCCTTGGAGCCCTAAGCAGATCGGAAGAGCGGTTTCAG       |
| chr15 | 91432684  | 91432723  | FES_9359   | + | GTGACCTATGCACCAGACGTCTCCTGTCTGCTGGGCCAGGGCTGCTGGCCTGTCCACAGATCGGAAGAGCGGTTTCAG      |
| chr15 | 91432877  | 91432916  | FES_9360   | + | GTGACCTATGCACCAGACGTGCTTTGACCTGGGTGCGCGGGGGCTCCCAGCAGACCACAGATCGGAAGAGCGGTTTCAG     |
| chr15 | 91433203  | 91433242  | FES_9361   | + | GTGACCTATGCACCAGACGTCCCTGCCTGCAGCAGCCTCTGGCCCTCCCTCCCTACAGATCGGAAGAGCGGTTTCAG       |
| chr15 | 91433519  | 91433558  | FES_9362   | + | GTGACCTATGCACCAGACGTCCATCCCGCGCCGTGCTCCCGCCAGCCCTGGCCACCTGGAGATCGGAAGAGCGGTTTCAG    |
| chr15 | 91433725  | 91433764  | FES_9363   | + | GTGACCTATGCACCAGACGTCCCAGCCTGGGCCCCCTACTGTTGTGTTTGCAGTTTAATAGATCGGAAGAGCGGTTTCAG    |
| chr15 | 91434432  | 91434471  | FES_9364   | + | GTGACCTATGCACCAGACGTCTGGGACCCGAGCCTTCCAGGCCCTACTTCCCCTCCCTAGATCGGAAGAGCGGTTTCAG     |
| chr15 | 91434917  | 91434956  | FES_9365   | + | GTGACCTATGCACCAGACGTACCAGCCTGGCCCATGCCACTGTGGCAGGGCTTGGGAAGATCGGAAGAGCGGTTTCAG      |
| chr15 | 91435352  | 91435391  | FES_9366   | + | GTGACCTATGCACCAGACGTCTCTGCTGGCCTCTGTGCTGGCAGCTTCTCCTGAGTCAGATCGGAAGAGCGGTTTCAG      |
| chr15 | 91436066  | 91436105  | FES_9367   | + | GTGACCTATGCACCAGACGTAATGATCACCCAGGGTCCCAGCAGAGGTACAGATCGGAAGAGCGGTTTCAG             |
| chr15 | 91436435  | 91436474  | FES_9368   | + | GTGACCTATGCACCAGACGTGGCGCTGAGCTCCAGGTAGGGCCGCGCAGCCTGGTCAGGTGAGATCGGAAGAGCGGTTTCAG  |
| chr15 | 91436655  | 91436694  | FES_9369   | + | GTGACCTATGCACCAGACGTGGTGCCACGGGCCCTGCCAACACCCCGACCAGAGTCAAAGATCGGAAGAGCGGTTTCAG     |
| chr15 | 91437052  | 91437091  | FES_9370   | + | GTGACCTATGCACCAGACGTCTGCTACCCCTGGACTCCATGGCCAGAGGGCCAGGCCTGGAGATCGGAAGAGCGGTTTCAG   |
| chr15 | 91437299  | 91437338  | FES_9371   | + | GTGACCTATGCACCAGACGTGTGATGACAGCAGCCTCAGGCTGCACCCTTCCAGATGAGATCGGAAGAGCGGTTTCAG      |
| chr15 | 91438799  | 91438838  | FES_9372   | + | GTGACCTATGCACCAGACGTCCCTTCTCAAGCTGGTGGCCTGCAGGCCTAGGTGCAGCAGATCGGAAGAGCGGTTTCAG     |
| chr4  | 144258424 | 144258463 | GAB1_9373  | + | GTGACCTATGCACCAGACGTCTCGGGCCACCACTCCGCGGCCCTCGGCCCTCCAGCCCTAGATCGGAAGAGCGGTTTCAG    |
| chr4  | 144336935 | 144336974 | GAB1_9374  | + | GTGACCTATGCACCAGACGTGATATTACTATTCAACTGAATTCTTCTTTTCTGCTACATAGATCGGAAGAGCGGTTTCAG    |
| chr4  | 144354880 | 144354919 | GAB1_9375  | + | GTGACCTATGCACCAGACGTATGCCATGTGAGAGAGAGACAGAGCGTGTGTATGTGTAGATCGGAAGAGCGGTTTCAG      |
| chr4  | 144359764 | 144359803 | GAB1_9376  | + | GTGACCTATGCACCAGACGTGTGGACTTCTTCTATTAGAGTTAATGATAGAAAATCGAGATCGGAAGAGCGGTTTCAG      |
| chr4  | 144361051 | 144361090 | GAB1_9377  | + | GTGACCTATGCACCAGACGTGGACTTTGGCATCATCAAGTGTATTTTCTAATGCTAAATCAGATCGGAAGAGCGGTTTCAG   |
| chr4  | 144361546 | 144361585 | GAB1_9378  | + | GTGACCTATGCACCAGACGTATGCGCAAAGTAAAGGCTTGGGAGTGCCAAGTTAGATCAGATCGGAAGAGCGGTTTCAG     |
| chr4  | 144378933 | 144378972 | GAB1_9379  | + | GTGACCTATGCACCAGACGTAGCACCCAGCTGTATGGGGCTATGGGAATTTATTTGAGATCGGAAGAGCGGTTTCAG       |
| chr4  | 144380642 | 144380681 | GAB1_9380  | + | GTGACCTATGCACCAGACGTGTCTAAATATGTAGTTGTGTGAATAATGTGACTATCTAGATCGGAAGAGCGGTTTCAG      |
| chr4  | 144381651 | 144381690 | GAB1_9381  | + | GTGACCTATGCACCAGACGTTTTAACTTTTCCCTTCTGAGCAGCCCTTTTCACTTATAGATCGGAAGAGCGGTTTCAG      |
| chr4  | 144387389 | 144387428 | GAB1_9382  | + | GTGACCTATGCACCAGACGTGTGACATGTCTCTTTTGTATACAGTTAGTTTACACTTATAGATCGGAAGAGCGGTTTCAG    |
| chr4  | 144390353 | 144390392 | GAB1_9383  | + | GTGACCTATGCACCAGACGTGTGCCATTTCTGAACAAAAGAAAAGTGAATTGTAAGATAAGATCGGAAGAGCGGTTTCAG    |
| chr4  | 144359463 | 144359502 | GAB1_9384  | + | GTGACCTATGCACCAGACGTATGATTTAGTATTAGTTACTTCCCAACACCTGTTAAAGATCGGAAGAGCGGTTTCAG       |
| chr7  | 81332084  | 81332123  | HGF_9385   | + | GTGACCTATGCACCAGACGTGACATACAAAACAAAGTATTATTAGGAATTAATAAAGAGATCGGAAGAGCGGTTTCAG      |
| chr7  | 81334862  | 81334901  | HGF_9386   | + | GTGACCTATGCACCAGACGTGCAAAAACATACAATAAGGTGAGAAAAGTAAGAAAACAAAGATCGGAAGAGCGGTTTCAG    |
| chr7  | 81335080  | 81335119  | HGF_9387   | + | GTGACCTATGCACCAGACGTAAATACAATGGTAAGTACTCTCAACTGGATTCAACACAAAGATCGGAAGAGCGGTTTCAG    |
| chr7  | 81335754  | 81335793  | HGF_9388   | + | GTGACCTATGCACCAGACGTGGAATAAATTTAAATGTAAACATAATAATTTCAAATTCAGATCGGAAGAGCGGTTTCAG     |
| chr7  | 81336691  | 81336730  | HGF_9389   | + | GTGACCTATGCACCAGACGTGAGAAAAGAGAACAAGTAAACATCTGTGCAGAAAAGATGAAGATCGGAAGAGCGGTTTCAG   |
| chr7  | 81339570  | 81339609  | HGF_9390   | + | GTGACCTATGCACCAGACGTACCAAAACATAACATTTTTTAAATAAGAAATTTGAAATAATAGATCGGAAGAGCGGTTTCAG  |
| chr7  | 81340846  | 81340885  | HGF_9391   | + | GTGACCTATGCACCAGACGTAAATGTATAGATAAATACACAATTCATATATGATATATAGATCGGAAGAGCGGTTTCAG     |
| chr7  | 81346692  | 81346731  | HGF_9392   | + | GTGACCTATGCACCAGACGTAAACAGGCCCTGACATCACAAAGATGCTCATTCATCCAAGAGATCGGAAGAGCGGTTTCAG   |
| chr7  | 81350174  | 81350213  | HGF_9393   | + | GTGACCTATGCACCAGACGTAAATATACAGAATAAGTCCAATGAATATCAAGGCAGATAAAGATCGGAAGAGCGGTTTCAG   |
| chr7  | 81355344  | 81355383  | HGF_9394   | + | GTGACCTATGCACCAGACGTAAAGCATGTTAATGTAATTTGCCGGAGTCTTACGTTGGTAGATCGGAAGAGCGGTTTCAG    |
| chr7  | 81359106  | 81359145  | HGF_9395   | + | GTGACCTATGCACCAGACGTAAAACAACAAAACAAAACATATATAAAATCTTTGAAAGATCGGAAGAGCGGTTTCAG       |
| chr7  | 81372276  | 81372315  | HGF_9396   | + | GTGACCTATGCACCAGACGTAAAGTAGGTAAAAGGATACAGGATTGAAAGGTAAGAACTAAGATCGGAAGAGCGGTTTCAG   |

|       |           |           |            |   |                                                                                      |
|-------|-----------|-----------|------------|---|--------------------------------------------------------------------------------------|
| chr7  | 81372798  | 81372837  | HGF_9397   | + | GTGACCTATGCACCAGACGTCACCAAGAAAAGTGTACAGTAAATCTGCCTGGAAACACCAAGATCGGAAGAGCGGTTTCAG    |
| chr7  | 81374447  | 81374486  | HGF_9398   | + | GTGACCTATGCACCAGACGTTAAAGTATGGCATGTTAATTGTTTCTGCAGCAAAATCAAAGATCGGAAGAGCGGTTTCAG     |
| chr7  | 81381589  | 81381628  | HGF_9399   | + | GTGACCTATGCACCAGACGTAATGATAATCATTACAGTATAAGAGCATGCAACTTTTTTTAGATCGGAAGAGCGGTTTCAG    |
| chr7  | 81381574  | 81381613  | HGF_9400   | + | GTGACCTATGCACCAGACGTAAGAGCTAGTTTTAAATGATAATCATTACAGTATAAGAGATCGGAAGAGCGGTTTCAG       |
| chr7  | 81386630  | 81386669  | HGF_9401   | + | GTGACCTATGCACCAGACGTAAGTAGATAAAATATTGCAACTATGCAAAACATATGCAGAGATCGGAAGAGCGGTTTCAG     |
| chr7  | 81388131  | 81388170  | HGF_9402   | + | GTGACCTATGCACCAGACGTTATCAGAATGAAAAGAAGAAACTACTATTATACAGTAAGATCGGAAGAGCGGTTTCAG       |
| chr7  | 81392199  | 81392238  | HGF_9403   | + | GTGACCTATGCACCAGACGTCAAAATGTTTTAAAAAATAAACATTGGAGAAATGTTTTTAGATCGGAAGAGCGGTTTCAG     |
| chr7  | 81399298  | 81399337  | HGF_9404   | + | GTGACCTATGCACCAGACGTGACGGGCTGGCGGATCCCTCTGGAGGAGATGCCTGGGTGAAGATCGGAAGAGCGGTTTCAG    |
| chr12 | 68549278  | 68549317  | IFNG_9405  | + | GTGACCTATGCACCAGACGTAGAAAAGAGCAAAATTAATTTCCAGGCATATAAGCCATCAGAGATCGGAAGAGCGGTTTCAG   |
| chr12 | 68551886  | 68551925  | IFNG_9406  | + | GTGACCTATGCACCAGACGTAAGAGCACAACAAGAGGATGATGTGAATTTATCCATCAGAAGATCGGAAGAGCGGTTTCAG    |
| chr12 | 68552050  | 68552089  | IFNG_9407  | + | GTGACCTATGCACCAGACGTAAGAAAGAAAAAATTGGTTTTACAATTAGCCATAAATTGCCAGATCGGAAGAGCGGTTTCAG   |
| chr12 | 68553406  | 68553445  | IFNG_9408  | + | GTGACCTATGCACCAGACGTAGAATTAAGCCAAAGAGTTGAAATCAGTAGTTCTTGATAGATCGGAAGAGCGGTTTCAG      |
| chr6  | 160390438 | 160390477 | IGF2R_9409 | + | GTGACCTATGCACCAGACGTCGCCCGGACGCAAGGCTCCGCTCGCGGTCGCCGGGTGACAGATCGGAAGAGCGGTTTCAG     |
| chr6  | 160412366 | 160412405 | IGF2R_9410 | + | GTGACCTATGCACCAGACGTTACCTGAAATTAAGATTGGATTGGCAATATGATCCCAATTAGATCGGAAGAGCGGTTTCAG    |
| chr6  | 160430177 | 160430216 | IGF2R_9411 | + | GTGACCTATGCACCAGACGTACAGGCCTTGATGTATTTCTTAAAAAAGGTCTGAGATCGGAAGAGCGGTTTCAG           |
| chr6  | 160431828 | 160431867 | IGF2R_9412 | + | GTGACCTATGCACCAGACGTAACCTCAAATTCATGCTTATGAAGTAACTCTGGGGAACAGATCGGAAGAGCGGTTTCAG      |
| chr6  | 160445747 | 160445786 | IGF2R_9413 | + | GTGACCTATGCACCAGACGTTTGTTGGGGCTGAGGGGGTGGTGGTGGAGGATTTCTTCTATAGATCGGAAGAGCGGTTTCAG   |
| chr6  | 160448357 | 160448396 | IGF2R_9414 | + | GTGACCTATGCACCAGACGTGCTCGGAGTCTGCTGTGCTGCTTAAATGCTCCAGCAAGACATCGGAAGAGCGGTTTCAG      |
| chr6  | 160450698 | 160450737 | IGF2R_9415 | + | GTGACCTATGCACCAGACGTCGTCTCCTGATCACTAATGTGGCGCACAGTAGCCTGGTTAGATCGGAAGAGCGGTTTCAG     |
| chr6  | 160453756 | 160453795 | IGF2R_9416 | + | GTGACCTATGCACCAGACGTGCTTTCTGCCTCCTGGCGTCTTAGGAAGAAGGGGATCGAGATCGGAAGAGCGGTTTCAG      |
| chr6  | 160455565 | 160455604 | IGF2R_9417 | + | GTGACCTATGCACCAGACGTGCTGGAGTTCAGCCCTCCTCTTGCATTTCATGGCATGTAGATCGGAAGAGCGGTTTCAG      |
| chr6  | 160461767 | 160461806 | IGF2R_9418 | + | GTGACCTATGCACCAGACGTCCTTGCATGCGGGTCTTAGTCCACATGCTCATGGAACATAGATCGGAAGAGCGGTTTCAG     |
| chr6  | 160464331 | 160464370 | IGF2R_9419 | + | GTGACCTATGCACCAGACGTCCTGGATGGAAGATCTAGTGTGATGCTTTCTAGGGATCCAGATCGGAAGAGCGGTTTCAG     |
| chr6  | 160465700 | 160465739 | IGF2R_9420 | + | GTGACCTATGCACCAGACGTTAAAAAGCTGAAATTTCTGCTTCTGCCAGGTCCAGATCGGAAGAGCGGTTTCAG           |
| chr6  | 160466925 | 160466964 | IGF2R_9421 | + | GTGACCTATGCACCAGACGTAAGCAGGACCTCTGCTTAAATGTGACTTGAACCACTTAAAGATCGGAAGAGCGGTTTCAG     |
| chr6  | 160467688 | 160467727 | IGF2R_9422 | + | GTGACCTATGCACCAGACGTTCTCAGTTCTGTTTCATTCTTAGGCATTATATGCTAAGAAAGATCGGAAGAGCGGTTTCAG    |
| chr6  | 160468379 | 160468418 | IGF2R_9423 | + | GTGACCTATGCACCAGACGTTTGTCCCTCATCGCGCTCCCTGAGGATACTCATGCCCTGTGAGATCGGAAGAGCGGTTTCAG   |
| chr6  | 160468950 | 160468989 | IGF2R_9424 | + | GTGACCTATGCACCAGACGTGTCAGTGCTCTGTTTTGGCCTGGTACAGATGCTGAGGTAGATCGGAAGAGCGGTTTCAG      |
| chr6  | 160469586 | 160469625 | IGF2R_9425 | + | GTGACCTATGCACCAGACGTTTCTGCTGTTCTCCTTTGCCCTCAATCCATGACTGAGATCGGAAGAGCGGTTTCAG         |
| chr6  | 160471695 | 160471734 | IGF2R_9426 | + | GTGACCTATGCACCAGACGTCCTGCTGGCTGGTGGCCTTCACTGCTGCATTTTTGACTGTAGATCGGAAGAGCGGTTTCAG    |
| chr6  | 160477568 | 160477607 | IGF2R_9427 | + | GTGACCTATGCACCAGACGTTTTACCTGGCCCTCGTCTGAGTGCCTGCTGGACATCCAGATCGGAAGAGCGGTTTCAG       |
| chr6  | 160479167 | 160479206 | IGF2R_9428 | + | GTGACCTATGCACCAGACGTTATGATGCATTTCCAGTTTGCTTTGAAACAGGGGGAGAGTAGATCGGAAGAGCGGTTTCAG    |
| chr6  | 160480141 | 160480180 | IGF2R_9429 | + | GTGACCTATGCACCAGACGTAGCCATGTTGTTTTGTAGCTAAAAAGGGCCCTGGTGGCTCAGATCGGAAGAGCGGTTTCAG    |
| chr6  | 160482689 | 160482728 | IGF2R_9430 | + | GTGACCTATGCACCAGACGTTGCTGCTCTTGTGCGCTGTTTCATTTTATAGAGCAAGATCGGAAGAGCGGTTTCAG         |
| chr6  | 160482971 | 160483010 | IGF2R_9431 | + | GTGACCTATGCACCAGACGTAGACCAAGCAGTAAAGATGATGTTGCTGGGTTGACTCCATCCATGATCGGAAGAGCGGTTTCAG |
| chr6  | 160483662 | 160483701 | IGF2R_9432 | + | GTGACCTATGCACCAGACGTGCTGTCCTACAAGTCAATTTAAATGTATAGAGTAGCAGAGATCGGAAGAGCGGTTTCAG      |
| chr6  | 160485574 | 160485613 | IGF2R_9433 | + | GTGACCTATGCACCAGACGTACCGACGGCCCTCAGCGGGTCTTCTCCCAACCCTCAGGCAGATCGGAAGAGCGGTTTCAG     |
| chr6  | 160485944 | 160485983 | IGF2R_9434 | + | GTGACCTATGCACCAGACGTGGATGTGTTGCTCTTTGGACAGACTAATTGGTATGATAGATCGGAAGAGCGGTTTCAG       |
| chr6  | 160489428 | 160489467 | IGF2R_9435 | + | GTGACCTATGCACCAGACGTGCTCCTCGTGGGGTGGTGTGTCAGTGAAGTGTATCACAGAGATCGGAAGAGCGGTTTCAG     |
| chr6  | 160491101 | 160491140 | IGF2R_9436 | + | GTGACCTATGCACCAGACGTGTTCTGACCTTCTGCTGTTGCAGCTTTGGGAATGAGCAGATCGGAAGAGCGGTTTCAG       |
| chr6  | 160493079 | 160493118 | IGF2R_9437 | + | GTGACCTATGCACCAGACGTGTCAGTCCTTACCCTCAGCCAGGTGAGAGACGGTGCAGATCGGAAGAGCGGTTTCAG        |
| chr6  | 160493927 | 160493966 | IGF2R_9438 | + | GTGACCTATGCACCAGACGTTGGTCTCTCGTGTGTTGCTGACTCTCCCGTCTCTGGGGAGATCGGAAGAGCGGTTTCAG      |
| chr6  | 160494512 | 160494551 | IGF2R_9439 | + | GTGACCTATGCACCAGACGTAGATGGGACGGGAGAGTGCATGTCAGTGCCTGGCTGCAGATCGGAAGAGCGGTTTCAG       |
| chr6  | 160495018 | 160495057 | IGF2R_9440 | + | GTGACCTATGCACCAGACGTCAAATCCAAAGGGTGAGATAATTTTTGCAAGACTTTTAGTAGATCGGAAGAGCGGTTTCAG    |
| chr6  | 160497039 | 160497078 | IGF2R_9441 | + | GTGACCTATGCACCAGACGTGCTGTGACGATCTAGATGCTCAACTCGGGTGTAGTGAGCAGATCGGAAGAGCGGTTTCAG     |
| chr6  | 160499405 | 160499444 | IGF2R_9442 | + | GTGACCTATGCACCAGACGTCAACCTGGCGTGTGTTGGTGCAGGTGACCAGGTGACCAGATCGGAAGAGCGGTTTCAG       |
| chr6  | 160500830 | 160500869 | IGF2R_9443 | + | GTGACCTATGCACCAGACGTGCAATGAGGTAAATAAATCAAGCTCATAGTAAACTAGAAGATCGGAAGAGCGGTTTCAG      |
| chr6  | 160501318 | 160501357 | IGF2R_9444 | + | GTGACCTATGCACCAGACGTGGCTCCGCTCCCCACATGGCTGGGGCCTTGATACTGTAGATCGGAAGAGCGGTTTCAG       |
| chr6  | 160505227 | 160505266 | IGF2R_9445 | + | GTGACCTATGCACCAGACGTTCCAGTCCACCCGGCGCCACACCCTCAGCATGTGAACAGATCGGAAGAGCGGTTTCAG       |
| chr6  | 160506174 | 160506213 | IGF2R_9446 | + | GTGACCTATGCACCAGACGTTGGGCTCTGCTTGGTTCAAGGAGCAGCATCTGAACCGAGATCGGAAGAGCGGTTTCAG       |
| chr6  | 160509190 | 160509229 | IGF2R_9447 | + | GTGACCTATGCACCAGACGTTGGGGCTCAGAGCGGGATGTGCACTGAGCATACTGGAGATCGGAAGAGCGGTTTCAG        |
| chr6  | 160510296 | 160510335 | IGF2R_9448 | + | GTGACCTATGCACCAGACGTCGTTTCCCTCTGAGCTGAAATGTGTTCAAATAAACAAGATCGGAAGAGCGGTTTCAG        |
| chr6  | 160511146 | 160511185 | IGF2R_9449 | + | GTGACCTATGCACCAGACGTGCTTCCACAAAGTTCCACATTTAACTTCTCCAAGGAAGAGATCGGAAGAGCGGTTTCAG      |
| chr6  | 160517668 | 160517707 | IGF2R_9450 | + | GTGACCTATGCACCAGACGTCATCCGGAAGCTTAGCACTTGACCCACATCTTCCCTTAAAGATCGGAAGAGCGGTTTCAG     |
| chr6  | 160523714 | 160523753 | IGF2R_9451 | + | GTGACCTATGCACCAGACGTGGCAGGGCAGGTTGGGGCGGGTGGATTGCATGCCTCCCATAAAGATCGGAAGAGCGGTTTCAG  |
| chr6  | 160524858 | 160524897 | IGF2R_9452 | + | GTGACCTATGCACCAGACGTGGCGAGTCTTTGAAGGCCCTGCCCTCCCGGCCCTGTAGATCGGAAGAGCGGTTTCAG        |
| chr6  | 160526127 | 160526166 | IGF2R_9453 | + | GTGACCTATGCACCAGACGTCTGCGAGGACGACCGGAGCCGAGCAGCCACCTAGATCGGAAGAGCGGTTTCAG            |
| chr19 | 7117432   | 7117471   | INSR_9454  | + | GTGACCTATGCACCAGACGTCAGTCAACGCTGGTGAGTCTGGGGCCCTGCCACGCAGATCGGAAGAGCGGTTTCAG         |

|       |          |          |            |   |                                                                                     |
|-------|----------|----------|------------|---|-------------------------------------------------------------------------------------|
| chr19 | 7120771  | 7120810  | INSR_9455  | + | GTGACCTATGCACCAGACGTAAAAGGTTACACGCTCTTAACCTTACGCTTGGTCCTAGAGATCGGAAGAGCGGTTTCAG     |
| chr19 | 7122795  | 7122834  | INSR_9456  | + | GTGACCTATGCACCAGACGTAAACACGGGGTGGTGTTCAGCAGCACTGGGATCCGAGGAAGATCGGAAGAGCGGTTTCAG    |
| chr19 | 7123011  | 7123050  | INSR_9457  | + | GTGACCTATGCACCAGACGTAGCAACCAGGGTCTTGGAGGAGGGTCCGTGATTCGACTCAGATCGGAAGAGCGGTTTCAG    |
| chr19 | 7125549  | 7125588  | INSR_9458  | + | GTGACCTATGCACCAGACGTCTTATCTACACAGCATCCTTGGAGGATCCCTTGGGGGTCTAGATCGGAAGAGCGGTTTCAG   |
| chr19 | 7126673  | 7126712  | INSR_9459  | + | GTGACCTATGCACCAGACGTAAAACGAGGCACGTAGCTTGGATTCTCATGGACTCTGAGATCGGAAGAGCGGTTTCAG      |
| chr19 | 7128976  | 7129015  | INSR_9460  | + | GTGACCTATGCACCAGACGTATAAGAAAATATATGTTTCATATCAATGTGTTTCCAACAAGATCGGAAGAGCGGTTTCAG    |
| chr19 | 7132339  | 7132378  | INSR_9461  | + | GTGACCTATGCACCAGACGTAGAGAGGAGGAAGAGGGTGGCTGAGCTTGGACATCTGAGATCGGAAGAGCGGTTTCAG      |
| chr19 | 7143112  | 7143151  | INSR_9462  | + | GTGACCTATGCACCAGACGTAGTAGGACATGATGATGACACCATCACCATCATTTTTTTAGATCGGAAGAGCGGTTTCAG    |
| chr19 | 7150554  | 7150593  | INSR_9463  | + | GTGACCTATGCACCAGACGTAAAACCAACGCCTTTGAGGACAGAGGGAACCTCATTAGACAGATCGGAAGAGCGGTTTCAG   |
| chr19 | 7163221  | 7163260  | INSR_9464  | + | GTGACCTATGCACCAGACGTGAAAAGGAAATGGGTCCATCATGAGAAACAGTGTGCAAAGAGATCGGAAGAGCGGTTTCAG   |
| chr19 | 7166426  | 7166465  | INSR_9465  | + | GTGACCTATGCACCAGACGTAAAACAGCAGAAGGCGAGTTACCCTTACAAGACCGTCACACAGATCGGAAGAGCGGTTTCAG  |
| chr19 | 7168116  | 7168155  | INSR_9466  | + | GTGACCTATGCACCAGACGTAAAACAAAAGGCAAAAATGAGCTATTTTCAGTGATTTTCAGATCGGAAGAGCGGTTTCAG    |
| chr19 | 7170773  | 7170812  | INSR_9467  | + | GTGACCTATGCACCAGACGTAAACACACACATCTAGTCACTTCAACGGCTGGTCTTTCACAAAGATCGGAAGAGCGGTTTCAG |
| chr19 | 7172456  | 7172495  | INSR_9468  | + | GTGACCTATGCACCAGACGTGAGAGAATATCCAGTGGGTTTCTATAGACATATTTCAATCAGATCGGAAGAGCGGTTTCAG   |
| chr19 | 7174753  | 7174792  | INSR_9469  | + | GTGACCTATGCACCAGACGTAGCAGAGAGAGAGAGAAAAGAGAAAGGGGAGGGGGGTGTCAAGATCGGAAGAGCGGTTTCAG  |
| chr19 | 7267918  | 7267957  | INSR_9470  | + | GTGACCTATGCACCAGACGTAAATGAACAGAAAAGCAAGACAGGTGAGCAGACGCACGGTGAGATCGGAAGAGCGGTTTCAG  |
| chr19 | 7293913  | 7293952  | INSR_9471  | + | GTGACCTATGCACCAGACGTGCGCGGGGTCTCCTCGGATCAGAGCGCGCGCGCTGCCAGATCGGAAGAGCGGTTTCAG      |
| chr19 | 7267642  | 7267681  | INSR_9472  | + | GTGACCTATGCACCAGACGTGAGCAGCAGCTAGTAAAGACAGCTGTGATCCCCGGAGATCGGAAGAGCGGTTTCAG        |
| chr10 | 3821793  | 3821832  | KLF6_9473  | + | GTGACCTATGCACCAGACGTAAATGCAAGCACAGAAGAGTTAGTTCCATCCCTTGCAGATCGGAAGAGCGGTTTCAG       |
| chr10 | 3822432  | 3822471  | KLF6_9474  | + | GTGACCTATGCACCAGACGTAGCACAGGACAAGCAGCCATGACTTCACTGACCCGCAGAAGATCGGAAGAGCGGTTTCAG    |
| chr10 | 3824417  | 3824456  | KLF6_9475  | + | GTGACCTATGCACCAGACGTGAACACAGAGAAGGCACGTGATTGCCATGACGACCAAAAAGATCGGAAGAGCGGTTTCAG    |
| chr10 | 3827217  | 3827256  | KLF6_9476  | + | GTGACCTATGCACCAGACGTGTTGGACGGAGCCCGCGTCCGCGAGGGGCGCGGAGGCGCGCAGATCGGAAGAGCGGTTTCAG  |
| chr10 | 3824130  | 3824169  | KLF6_9477  | + | GTGACCTATGCACCAGACGTAGGTAACCTGGCCGTGGGAGAAATTCCTCGGAGCTGCAGATCGGAAGAGCGGTTTCAG      |
| chr1  | 43803609 | 43803648 | MPL_9478   | + | GTGACCTATGCACCAGACGTGAGAGCTGGAGTGGAGTACCTATGCCAGGAAGAGGCCAGATCGGAAGAGCGGTTTCAG      |
| chr1  | 43803913 | 43803952 | MPL_9479   | + | GTGACCTATGCACCAGACGTGACTGTGCCCACTCCCATGTATCTGTCCCTGCACTTAGAGATCGGAAGAGCGGTTTCAG     |
| chr1  | 43804402 | 43804441 | MPL_9480   | + | GTGACCTATGCACCAGACGTTCCTCCTGTACCCTGCCCTCCACTTGCTGCCCCAGTAGATCGGAAGAGCGGTTTCAG       |
| chr1  | 43805251 | 43805290 | MPL_9481   | + | GTGACCTATGCACCAGACGTCTTCTTCTGCCCACTCTTATCTCCATCTTCAATCTTGGATCGGAAGAGCGGTTTCAG       |
| chr1  | 43805808 | 43805847 | MPL_9482   | + | GTGACCTATGCACCAGACGTAAAGAAATGAGGAGATGGGGAGGAGATAAAAGAATATCTCAGATCGGAAGAGCGGTTTCAG   |
| chr1  | 43806195 | 43806234 | MPL_9483   | + | GTGACCTATGCACCAGACGTAACTGCTAGTTAGGTTGGTGTGATGGGAGTGAGCCACAAGATCGGAAGAGCGGTTTCAG     |
| chr1  | 43812311 | 43812350 | MPL_9484   | + | GTGACCTATGCACCAGACGTCTTCTCATTCTCCACATAGTTCCACCCCACTGAAAGATCGGAAGAGCGGTTTCAG         |
| chr1  | 43812616 | 43812655 | MPL_9485   | + | GTGACCTATGCACCAGACGTGCAACAAATGCCACAGACCTCACTACGCAGGGATCCCTAGATCGGAAGAGCGGTTTCAG     |
| chr1  | 43815041 | 43815080 | MPL_9486   | + | GTGACCTATGCACCAGACGTGCCAGGCAGGAGACTGCGGGTGGACCAGGTGGAGCCGAAAGATCGGAAGAGCGGTTTCAG    |
| chr1  | 43817985 | 43818024 | MPL_9487   | + | GTGACCTATGCACCAGACGTTCCTCCCTGTGCCACCACCAAGCTGCCTGGTACTGAGATCGGAAGAGCGGTTTCAG        |
| chr1  | 43818454 | 43818493 | MPL_9488   | + | GTGACCTATGCACCAGACGTCTCACTCCAGTCCCTGGACAGCTAACTCTCGAGACAGATCGGAAGAGCGGTTTCAG        |
| chr1  | 45795120 | 45795159 | MUTYH_9489 | + | GTGACCTATGCACCAGACGTGGAAGAGGAGGGCCCTTTAGTTGGGGAGGGGAGCAGATCGGAAGAGCGGTTTCAG         |
| chr1  | 45796240 | 45796279 | MUTYH_9490 | + | GTGACCTATGCACCAGACGTAGACAGGGAGGTGAGGGCTGGCCTTTTTGCAAAAGAGATAGATCGGAAGAGCGGTTTCAG    |
| chr1  | 45797017 | 45797056 | MUTYH_9491 | + | GTGACCTATGCACCAGACGTGGTCAAGGGTTCAAATAGGCCTGTGGATATAGCCTCAAAGATCGGAAGAGCGGTTTCAG     |
| chr1  | 45797239 | 45797278 | MUTYH_9492 | + | GTGACCTATGCACCAGACGTGGGCAGCCAGGAGGGGTACGGCCCTAGCTGCCGATTCAGATCGGAAGAGCGGTTTCAG      |
| chr1  | 45797532 | 45797571 | MUTYH_9493 | + | GTGACCTATGCACCAGACGTAGATCCCGAACCCCTACTCAAGCCAAGAGGGCTTTAGGGGAGATCGGAAGAGCGGTTTCAG   |
| chr1  | 45797769 | 45797808 | MUTYH_9494 | + | GTGACCTATGCACCAGACGTGAGGGTGTGATGTATAGGGCAGACTCCTTAGGACTAGATCGGAAGAGCGGTTTCAG        |
| chr1  | 45797993 | 45798032 | MUTYH_9495 | + | GTGACCTATGCACCAGACGTGGAACACTGCTGTGAAGCAGACTCCCTTTGCAGACACCCAGATCGGAAGAGCGGTTTCAG    |
| chr1  | 45798171 | 45798210 | MUTYH_9496 | + | GTGACCTATGCACCAGACGTGGGGCCAAAGAGTTAGCCTGGGCTGGGAGGAAGGAGGCTGAGATCGGAAGAGCGGTTTCAG   |
| chr1  | 45798370 | 45798409 | MUTYH_9497 | + | GTGACCTATGCACCAGACGTGCAAGACTCAAGATTATAAGACCCAAAGACTCCTGGGTAGATCGGAAGAGCGGTTTCAG     |
| chr1  | 45798517 | 45798556 | MUTYH_9498 | + | GTGACCTATGCACCAGACGTGATCAGAGGTCAAAGAGATCACCCGTCAGTCCCTTATTGAGATCGGAAGAGCGGTTTCAG    |
| chr1  | 45798642 | 45798681 | MUTYH_9499 | + | GTGACCTATGCACCAGACGTAGGCAGGCAGAAAGAGACAAGGTCAAGGGTGAAGGTGGTAAAGATCGGAAGAGCGGTTTCAG  |
| chr1  | 45798853 | 45798892 | MUTYH_9500 | + | GTGACCTATGCACCAGACGTGGGTTGGCATGGAGCAGCTGAGATGCCCTACCTGGAGATCGGAAGAGCGGTTTCAG        |
| chr1  | 45799007 | 45799046 | MUTYH_9501 | + | GTGACCTATGCACCAGACGTAAACCCAGATGAGGAGTTAGGGTGGAGGGGGCTGGGTGCCAGATCGGAAGAGCGGTTTCAG   |
| chr1  | 45799244 | 45799283 | MUTYH_9502 | + | GTGACCTATGCACCAGACGTCCCAGGACTCAGCAATCATCCCTGCACAGGCTGTGCATAGATCGGAAGAGCGGTTTCAG     |
| chr1  | 45799247 | 45799286 | MUTYH_9503 | + | GTGACCTATGCACCAGACGTAGGACACTCAGCAATCATCCCTGCACAGGCTGTGCATCAGAGATCGGAAGAGCGGTTTCAG   |
| chr1  | 45799277 | 45799316 | MUTYH_9504 | + | GTGACCTATGCACCAGACGTTGTGCATCAGGGTCTTGGGACACAGCAGCCTGTGGCAGTAAGATCGGAAGAGCGGTTTCAG   |
| chr1  | 45799286 | 45799325 | MUTYH_9505 | + | GTGACCTATGCACCAGACGTGGTCTTGGGACACAGCAGCCTGTGGCAGTATGCTCCACAGATCGGAAGAGCGGTTTCAG     |
| chr1  | 45800188 | 45800227 | MUTYH_9506 | + | GTGACCTATGCACCAGACGTGAAACAGCCAGCCAGACAGTCAGTCAATGAGGACAGATCGGAAGAGCGGTTTCAG         |
| chr1  | 45800194 | 45800233 | MUTYH_9507 | + | GTGACCTATGCACCAGACGTAAAGACCCAGCCAAAGCAGTCAGTCACAATGAGGCCAAATAGATCGGAAGAGCGGTTTCAG   |
| chr1  | 45805937 | 45805976 | MUTYH_9508 | + | GTGACCTATGCACCAGACGTAGTGACGATGGCGAGTTTCAGCTCCCGCAGCTCCGACGAGATCGGAAGAGCGGTTTCAG     |
| chr1  | 40363653 | 40363692 | MYCL1_9509 | + | GTGACCTATGCACCAGACGTAAAGAGATCAAGAGAAGAAACACATCCATGAGAAACAAGATCGGAAGAGCGGTTTCAG      |
| chr1  | 40367117 | 40367156 | MYCL1_9510 | + | GTGACCTATGCACCAGACGTTCGGGAGGGGAAGGGGGACGTGCTGACCCGGTGCCGCCAGATCGGAAGAGCGGTTTCAG     |
| chr1  | 40363353 | 40363392 | MYCL1_9511 | + | GTGACCTATGCACCAGACGTCCCTTACAGGTGGGGACCTCAGTCACTCTTCATCCTCCAGATCGGAAGAGCGGTTTCAG     |
| chr1  | 40366806 | 40366845 | MYCL1_9512 | + | GTGACCTATGCACCAGACGTCCGAGAAGCCCTCCACATGCACTACCGGCTGATGGAAGATCGGAAGAGCGGTTTCAG       |

|       |           |           |             |   |                                                                                     |
|-------|-----------|-----------|-------------|---|-------------------------------------------------------------------------------------|
| chr5  | 142658987 | 142659026 | NR3C1_9513  | + | GTGACCTATGCACCAGACGTGATAATCTACGTTTTAGAAGCTCTTTTTGAAACTTAACAGATCGGAAGAGCGGTTTCAG     |
| chr5  | 142661617 | 142661656 | NR3C1_9514  | + | GTGACCTATGCACCAGACGTAGATATGGTAATGATCAGGCTTCCAATTGGTCAGTGGGAAGATCGGAAGAGCGGTTTCAG    |
| chr5  | 142675166 | 142675205 | NR3C1_9515  | + | GTGACCTATGCACCAGACGTAAATAGCAGGGTATTAGTTAGAATACTGCTACTTCCCCAGATCGGAAGAGCGGTTTCAG     |
| chr5  | 142678388 | 142678427 | NR3C1_9516  | + | GTGACCTATGCACCAGACGTAGAAATAAAGGTATGAGGCAACTCTTCAGAAGATCATCAGATCGGAAGAGCGGTTTCAG     |
| chr5  | 142680339 | 142680378 | NR3C1_9517  | + | GTGACCTATGCACCAGACGTTAAACAATAACATAGAAATGAATGTAATGGGAAGGTCTAGATCGGAAGAGCGGTTTCAG     |
| chr5  | 142689789 | 142689828 | NR3C1_9518  | + | GTGACCTATGCACCAGACGTAAAAGGCAGTATAAAGTTTCACAGGCTTCAAACATATAGATCGGAAGAGCGGTTTCAG      |
| chr5  | 142693744 | 142693783 | NR3C1_9519  | + | GTGACCTATGCACCAGACGTGGAAGAACAGTGTATGATTTAACTGTCAAAGGAATATCAAGATCGGAAGAGCGGTTTCAG    |
| chr5  | 142780415 | 142780454 | NR3C1_9520  | + | GTGACCTATGCACCAGACGTCAACTACAAAAACAAAAACAAAAACGCGGGGAAAACATCAAGATCGGAAGAGCGGTTTCAG   |
| chr5  | 142779625 | 142779664 | NR3C1_9521  | + | GTGACCTATGCACCAGACGTATTATCCTTAATTTTTGGGTTTAGTGCCGGTAAAATGAGAAGATCGGAAGAGCGGTTTCAG   |
| chr5  | 142780019 | 142780058 | NR3C1_9522  | + | GTGACCTATGCACCAGACGTAGGTTTGCAATGCTTTCTTCCAAAAGCTTTAAGTCTGTTTAGATCGGAAGAGCGGTTTCAG   |
| chr18 | 39535335  | 39535374  | PIK3C3_9523 | + | GTGACCTATGCACCAGACGTACTCGGGACAGGGAGTGGGATTGCTGGGGCGTAGGGACGTAGATCGGAAGAGCGGTTTCAG   |
| chr18 | 39537734  | 39537773  | PIK3C3_9524 | + | GTGACCTATGCACCAGACGTTTTGGTCATGGTATGTTACAGACTGTTCTTACCTTTCTAGATCGGAAGAGCGGTTTCAG     |
| chr18 | 39542608  | 39542647  | PIK3C3_9525 | + | GTGACCTATGCACCAGACGTTGTGGTCTCATCTGTAGGAGGTAGCAGCTTTCTGACCCAGATCGGAAGAGCGGTTTCAG     |
| chr18 | 39550431  | 39550470  | PIK3C3_9526 | + | GTGACCTATGCACCAGACGTTTCAATTTGGAACAGGTGCAAAGCTCTGACTGATGTCTATTGAGATCGGAAGAGCGGTTTCAG |
| chr18 | 39570529  | 39570568  | PIK3C3_9527 | + | GTGACCTATGCACCAGACGTTGGAAGTGTGTTGGTCTCTAAAGTAGAGGGGAGAGGAAAAGATCGGAAGAGCGGTTTCAG    |
| chr18 | 39573316  | 39573355  | PIK3C3_9528 | + | GTGACCTATGCACCAGACGTTGCAATTTTTTATGAAAGTACTTTTTCTCAGAGTAAATAGATCGGAAGAGCGGTTTCAG     |
| chr18 | 39575969  | 39576008  | PIK3C3_9529 | + | GTGACCTATGCACCAGACGTTTGAATATTAATTTAAAATAGTTAAATGGGTGTTCTGAGATCGGAAGAGCGGTTTCAG      |
| chr18 | 39576705  | 39576744  | PIK3C3_9530 | + | GTGACCTATGCACCAGACGTTGAATTTTCATATTAATAATTTTACCTAACCAACTTTGTTAGATCGGAAGAGCGGTTTCAG   |
| chr18 | 39584516  | 39584555  | PIK3C3_9531 | + | GTGACCTATGCACCAGACGTATTTATTCTGCTTCAATGGGTCAATTTTAAACTAGAGCAGATCGGAAGAGCGGTTTCAG     |
| chr18 | 39593571  | 39593610  | PIK3C3_9532 | + | GTGACCTATGCACCAGACGTCCAGGGAGGACATATTTCTAGTTTGTAAATTTTTCCCTTAGATCGGAAGAGCGGTTTCAG    |
| chr18 | 39595541  | 39595580  | PIK3C3_9533 | + | GTGACCTATGCACCAGACGTAGCTTTTTCCAGCTTCCATAGGAGAGATCCTACTGCATGAAGATCGGAAGAGCGGTTTCAG   |
| chr18 | 39600680  | 39600719  | PIK3C3_9534 | + | GTGACCTATGCACCAGACGTATAATTTCTGTTTATTCTTATTACCTTAAGAATTATAGATCGGAAGAGCGGTTTCAG       |
| chr18 | 39609416  | 39609455  | PIK3C3_9535 | + | GTGACCTATGCACCAGACGTGGTGTATGCTTTTTGTTCTAATAGACCTTGGCATCAGAAAGATCGGAAGAGCGGTTTCAG    |
| chr18 | 39613932  | 39613971  | PIK3C3_9536 | + | GTGACCTATGCACCAGACGTTGGATTTAATGTATTTAATGTGAACATTTCTAAGACATCGGAAGAGCGGTTTCAG         |
| chr18 | 39617795  | 39617834  | PIK3C3_9537 | + | GTGACCTATGCACCAGACGTTCTTATGTTGGTGGGAACATTTTTTTCGTTTGGAAACAGATCGGAAGAGCGGTTTCAG      |
| chr18 | 39618825  | 39618864  | PIK3C3_9538 | + | GTGACCTATGCACCAGACGTTTACATCATTATTTACTTTAGTGTACATTGTGTGAAGATCGGAAGAGCGGTTTCAG        |
| chr18 | 39620716  | 39620755  | PIK3C3_9539 | + | GTGACCTATGCACCAGACGTTAATAAAGATTATGCAATTCATGAATATATTTCTGTCAAAAGATCGGAAGAGCGGTTTCAG   |
| chr18 | 39623792  | 39623831  | PIK3C3_9540 | + | GTGACCTATGCACCAGACGTCAGGCTATTACTTTCCATTGATCAGATAAAGAAGAGCAGGAGATCGGAAGAGCGGTTTCAG   |
| chr18 | 39629580  | 39629619  | PIK3C3_9541 | + | GTGACCTATGCACCAGACGTGACTACCCAGTAGACATACTTTATATGCCCATGGTTTAGATCGGAAGAGCGGTTTCAG      |
| chr18 | 39638026  | 39638065  | PIK3C3_9542 | + | GTGACCTATGCACCAGACGTTTGCTTGGCCAGACAGAAATTTGGGTAAATTTATTTTTAGATCGGAAGAGCGGTTTCAG     |
| chr18 | 39644805  | 39644844  | PIK3C3_9543 | + | GTGACCTATGCACCAGACGTAGTAACATAAATGAAGAGCTCTTCTGTATAATTTTTCCATAGATCGGAAGAGCGGTTTCAG   |
| chr18 | 39647488  | 39647527  | PIK3C3_9544 | + | GTGACCTATGCACCAGACGTTGAGTGCAGTGCATTTTTCTCACCTTCTCCGTGTACTGCCAGATCGGAAGAGCGGTTTCAG   |
| chr18 | 39661112  | 39661151  | PIK3C3_9545 | + | GTGACCTATGCACCAGACGTGACCCATCAAGATGCTTGGCTCAATAAGAAAACACGTTAAGATCGGAAGAGCGGTTTCAG    |
| chr1  | 9775838   | 9775877   | PIK3CD_9546 | + | GTGACCTATGCACCAGACGTGAGTGGGCCGCTGCGCCGGCTGCCCTGCCCTGCCCCACAGATCGGAAGAGCGGTTTCAG     |
| chr1  | 9776147   | 9776186   | PIK3CD_9547 | + | GTGACCTATGCACCAGACGTGCGTGGCCCTGCCGCTGAGGCTGCTCTGTCCATGGGGAGAGATCGGAAGAGCGGTTTCAG    |
| chr1  | 9776688   | 9776727   | PIK3CD_9548 | + | GTGACCTATGCACCAGACGTTGAGGCCCTCTGCACTCTGGGCTCCCAACGCCCTGGATAGAGATCGGAAGAGCGGTTTCAG   |
| chr1  | 9777177   | 9777216   | PIK3CD_9549 | + | GTGACCTATGCACCAGACGTGCCCTCCGCCTCCCCTCTGAGCCACCCTTCTTTCCACCTAGATCGGAAGAGCGGTTTCAG    |
| chr1  | 9777695   | 9777734   | PIK3CD_9550 | + | GTGACCTATGCACCAGACGTTGGGATAGTGGGAGAGACACTGTTTTTTGCACAAAACAAGATCGGAAGAGCGGTTTCAG     |
| chr1  | 9778984   | 9779023   | PIK3CD_9551 | + | GTGACCTATGCACCAGACGTGGGCCCGGCTGGGAGGGGTGCAGACCSCCGGAGACCAGTACAGATCGGAAGAGCGGTTTCAG  |
| chr1  | 9780086   | 9780125   | PIK3CD_9552 | + | GTGACCTATGCACCAGACGTGCCACGGAGGGAGAGCGGTTGGGAGTGTGAGGGTCCAGAGATCGGAAGAGCGGTTTCAG     |
| chr1  | 9780311   | 9780350   | PIK3CD_9553 | + | GTGACCTATGCACCAGACGTCCCCCGCCGCTGAGGCTGAGGGGCTGGCCGGAGCTCTCAGATCGGAAGAGCGGTTTCAG     |
| chr1  | 9780730   | 9780769   | PIK3CD_9554 | + | GTGACCTATGCACCAGACGTTGGGGGTGTGGGGTGGGGGGCATGGAGCCGGCGTGAACAGATCGGAAGAGCGGTTTCAG     |
| chr1  | 9780978   | 9781017   | PIK3CD_9555 | + | GTGACCTATGCACCAGACGTAGGGCCACCTGGGGCGGAGCTGGGGGCGAGACCAGCCTAGATCGGAAGAGCGGTTTCAG     |
| chr1  | 9781317   | 9781356   | PIK3CD_9556 | + | GTGACCTATGCACCAGACGTGCTGGGCGCTCCCACCTTCTCCAGAGGGCAGCTGTGTCTTAGATCGGAAGAGCGGTTTCAG   |
| chr1  | 9781656   | 9781695   | PIK3CD_9557 | + | GTGACCTATGCACCAGACGTTTCCCCAGCCGTTCTGTGGGAATCCCAGCCCTGAGTCTAGTCTCGGAAGAGCGGTTTCAG    |
| chr1  | 9781929   | 9781968   | PIK3CD_9558 | + | GTGACCTATGCACCAGACGTAGGCCCTGGGGCGGGCAGGGGCGGCCCTGAGCCTGAGATCGGAAGAGCGGTTTCAG        |
| chr1  | 9782222   | 9782261   | PIK3CD_9559 | + | GTGACCTATGCACCAGACGTGCCCGCCACAAGGGTCTCCACCCCTGGGAGGCGGTAGATCGGAAGAGCGGTTTCAG        |
| chr1  | 9782425   | 9782464   | PIK3CD_9560 | + | GTGACCTATGCACCAGACGTGGCCTCCCCACACCCCGCCTGTACTGCCCTGGGGGCTCTAGATCGGAAGAGCGGTTTCAG    |
| chr1  | 9782675   | 9782714   | PIK3CD_9561 | + | GTGACCTATGCACCAGACGTCCACCCACATCGTCCCTTGGTGTCTGTGCCAGCCTGGGAGATCGGAAGAGCGGTTTCAG     |
| chr1  | 9783361   | 9783400   | PIK3CD_9562 | + | GTGACCTATGCACCAGACGTGGCCAGGGATAGGTTCCCTCTCTTCCAAGAGGTGTGGAGATCGGAAGAGCGGTTTCAG      |
| chr1  | 9784161   | 9784200   | PIK3CD_9563 | + | GTGACCTATGCACCAGACGTTGGTGTGGCGGCTGCTGTGGGACTTTGGCTTCTGCCCCAGATCGGAAGAGCGGTTTCAG     |
| chr1  | 9784490   | 9784529   | PIK3CD_9564 | + | GTGACCTATGCACCAGACGTTGCCGCCACAGATGCCCCCTCGGTTGGGGCCCAAGGAGATCGGAAGAGCGGTTTCAG       |
| chr1  | 9785005   | 9785044   | PIK3CD_9565 | + | GTGACCTATGCACCAGACGTGGCAGGAGACTGCTGTGCCAGTGGACTTCCAAGCCCTGCAGATCGGAAGAGCGGTTTCAG    |
| chr1  | 9787115   | 9787154   | PIK3CD_9566 | + | GTGACCTATGCACCAGACGTGAGCCCTGGGCCCAAGAGGAGGCGGCTGCGGGTCTGGGGAGATCGGAAGAGCGGTTTCAG    |
| chr19 | 18267022  | 18267061  | PIK3R2_9567 | + | GTGACCTATGCACCAGACGTAGCAGGGGCCCTGGAAGGGGGTGGTCCCTCAGACCCTAGATCGGAAGAGCGGTTTCAG      |
| chr19 | 18271790  | 18271829  | PIK3R2_9568 | + | GTGACCTATGCACCAGACGTGCCTCAATGGGTTGGGAGGAGGCTGGGGGCCCAAGTACAAGATCGGAAGAGCGGTTTCAG    |
| chr19 | 18272006  | 18272045  | PIK3R2_9569 | + | GTGACCTATGCACCAGACGTTGGTGGCTGGGCTGCTGTGGGACTTTGGCTTCTGCCCCAGATCGGAAGAGCGGTTTCAG     |
| chr19 | 18272872  | 18272911  | PIK3R2_9570 | + | GTGACCTATGCACCAGACGTTGTATTGCTGTCTTTCTCCCGTTGGGGCCGTAATACAGATCGGAAGAGCGGTTTCAG       |

|       |           |           |              |   |                                                                                          |
|-------|-----------|-----------|--------------|---|------------------------------------------------------------------------------------------|
| chr19 | 18273131  | 18273170  | PIK3R2_9571  | + | GTGACCTATGCACCAGACGTGGCAGGGGGCCAGGGACCAAGGAGGTGTACAGGGTGAGCAGATCGGAAGAGCGGTTTCAG         |
| chr19 | 18273327  | 18273366  | PIK3R2_9572  | + | GTGACCTATGCACCAGACGTGCCCTGCAAGGATAACCGGGGGTACAGGTCACAGAGACAGATCGGAAGAGCGGTTTCAG          |
| chr19 | 18273968  | 18274007  | PIK3R2_9573  | + | GTGACCTATGCACCAGACGTGCCTGGGAGCCAGGGAGGGTAGCACCTGGCTGGCCCCAGGAGATCGGAAGAGCGGTTTCAG        |
| chr19 | 18274209  | 18274248  | PIK3R2_9574  | + | GTGACCTATGCACCAGACGTCCCCGTACATGAGGGAAACCGAGACATAGAGGGGCAGTGGAGATCGGAAGAGCGGTTTCAG        |
| chr19 | 18278127  | 18278166  | PIK3R2_9575  | + | GTGACCTATGCACCAGACGTGCTCCATACTTCCCTGCCGCTCCCTGGCGACTGCTGCGGCACATCGGAAGAGCGGTTTCAG        |
| chr19 | 18279717  | 18279756  | PIK3R2_9576  | + | GTGACCTATGCACCAGACGTGCGCAGCGGTGGGGATTCCCCTGCCCTCCCTCCAGAGCTCTCAAGATCGGAAGAGCGGTTTCAG     |
| chr19 | 18280115  | 18280154  | PIK3R2_9577  | + | GTGACCTATGCACCAGACGTCCCGGCCCAAGCAGAGCCGCCCTTGGCCCGTCTGCGCCGAGATCGGAAGAGCGGTTTCAG         |
| chr7  | 113520191 | 113520230 | PPP1R3A_9578 | + | GTGACCTATGCACCAGACGTAAAAACAACAAAGAAATAATGACCATAAGATCTTTTAAAAAGATCGGAAGAGCGGTTTCAG        |
| chr7  | 113522229 | 113522268 | PPP1R3A_9579 | + | GTGACCTATGCACCAGACGTAATATAATTGTCCATGTGAAGATTGTTTTAATTGTAGACAGATCGGAAGAGCGGTTTCAG         |
| chr7  | 113522386 | 113522425 | PPP1R3A_9580 | + | GTGACCTATGCACCAGACGTAAAAAGAAAATGTATATGTTTTTCTGGGACTGCATCTTCAGATCGGAAGAGCGGTTTCAG         |
| chr7  | 113559062 | 113559101 | PPP1R3A_9581 | + | GTGACCTATGCACCAGACGTGATATCAATAAGAGAGAAGCTGACGACTAGTAGAGGCTGAGATCGGAAGAGCGGTTTCAG         |
| chr7  | 113558671 | 113558710 | PPP1R3A_9582 | + | GTGACCTATGCACCAGACGTTTTTCTGTTTGGATTTGTTCATAAGATCTTCTTTTGAAGATCGGAAGAGCGGTTTCAG           |
| chr7  | 113518268 | 113518307 | PPP1R3A_9583 | + | GTGACCTATGCACCAGACGTATTTCTTCTGTTTGAATTCAAAATATTTTCTGATTTCTGATAGATCGGAAGAGCGGTTTCAG       |
| chr7  | 113518748 | 113518787 | PPP1R3A_9584 | + | GTGACCTATGCACCAGACGTTTCATTGTATAGATTACACTACTGTATCTCGTTGACAAAAAGATCGGAAGAGCGGTTTCAG        |
| chr7  | 113519228 | 113519267 | PPP1R3A_9585 | + | GTGACCTATGCACCAGACGTCCACCTGATTTTTCTTCAACTTGGAAAAGATAATCATTCCAGATCGGAAGAGCGGTTTCAG        |
| chr7  | 113519708 | 113519747 | PPP1R3A_9586 | + | GTGACCTATGCACCAGACGTTTTACTTCAATATTTTAGTCTCCCTCATGTTTTTATAGATCGGAAGAGCGGTTTCAG            |
| chr11 | 111597792 | 111597831 | PPP2R1B_9587 | + | GTGACCTATGCACCAGACGTAAACAGCATGTTGCTGCCAGCAGGAAGAGGGGCCACTTTTCAGATCGGAAGAGCGGTTTCAG       |
| chr11 | 111608304 | 111608343 | PPP2R1B_9588 | + | GTGACCTATGCACCAGACGTAGACAGTGGCGCTGTAACTGTCCTGACCAGGGCACATCCAGATCGGAAGAGCGGTTTCAG         |
| chr11 | 111612347 | 111612386 | PPP2R1B_9589 | + | GTGACCTATGCACCAGACGTCCAAAACAAATCAGGTTAGTGGTACAGAAAAGTTACGAAACAGATCGGAAGAGCGGTTTCAG       |
| chr11 | 111612879 | 111612918 | PPP2R1B_9590 | + | GTGACCTATGCACCAGACGTAAAGTATTATCTGTGAAAGACAGTCTAATGGGCCATAGAAAGATCGGAAGAGCGGTTTCAG        |
| chr11 | 111613400 | 111613439 | PPP2R1B_9591 | + | GTGACCTATGCACCAGACGTAAAGTAAGATGGCACATTTAAATACTTTAAAAAATTCCAAAGATCGGAAGAGCGGTTTCAG        |
| chr11 | 111614265 | 111614304 | PPP2R1B_9592 | + | GTGACCTATGCACCAGACGTGGTCAAAAACATGTTCTCATATCGCTTATTGTTTTTAAAGATCGGAAGAGCGGTTTCAG          |
| chr11 | 111618749 | 111618788 | PPP2R1B_9593 | + | GTGACCTATGCACCAGACGTAGAAGATCCATTAAACATATTGCCAAAATTCAGAAATAAGATCGGAAGAGCGGTTTCAG          |
| chr11 | 111623067 | 111623106 | PPP2R1B_9594 | + | GTGACCTATGCACCAGACGTAAAGACCCCAAAAAGCACACATTTAAAAATCAAGTACTCTGAGATCGGAAGAGCGGTTTCAG       |
| chr11 | 111624312 | 111624351 | PPP2R1B_9595 | + | GTGACCTATGCACCAGACGTATCGAAATTAAGAGCCTTTATTACAAGACAACAGAACTTAGATCGGAAGAGCGGTTTCAG         |
| chr11 | 111625304 | 111625343 | PPP2R1B_9596 | + | GTGACCTATGCACCAGACGTAAAGAAAAAAGAATGCTTTCACAGGGCCATTACAAAGAGATCGGAAGAGCGGTTTCAG           |
| chr11 | 111625829 | 111625868 | PPP2R1B_9597 | + | GTGACCTATGCACCAGACGTATTTGAAACGGGTTTTAATGTATACTAACAAAAGAATTAACAGATCGGAAGAGCGGTTTCAG       |
| chr11 | 111626185 | 111626224 | PPP2R1B_9598 | + | GTGACCTATGCACCAGACGTAAATTTCTGTAATTCAGACATTTACTGAGACCCATGGGGAGATCGGAAGAGCGGTTTCAG         |
| chr11 | 111630686 | 111630725 | PPP2R1B_9599 | + | GTGACCTATGCACCAGACGTAAACAATGAAGGTATTTCCCATCAATAACACTGAATAAAAGATCGGAAGAGCGGTTTCAG         |
| chr11 | 111631786 | 111631825 | PPP2R1B_9600 | + | GTGACCTATGCACCAGACGTAAAAAGGAAAACAGAGAAGAATAATTTGAAATCAGGTAGATCGGAAGAGCGGTTTCAG           |
| chr11 | 111635640 | 111635679 | PPP2R1B_9601 | + | GTGACCTATGCACCAGACGTCAACAACAGGACTCATCAACATGGATAGCTCTCCACAGCAGATCGGAAGAGCGGTTTCAG         |
| chr11 | 111636119 | 111636158 | PPP2R1B_9602 | + | GTGACCTATGCACCAGACGTGAAAAGTAGAAAAGAAACAATGAAAAGAAACGGCTGAATTAGATCGGAAGAGCGGTTTCAG        |
| chr12 | 70915302  | 70915341  | PTPRB_9603   | + | GTGACCTATGCACCAGACGTGAACACTGTAATTAGAGACTGCCGCAGGGTGTGTGTCATAATAGATCGGAAGAGCGGTTTCAG      |
| chr12 | 70918382  | 70918421  | PTPRB_9604   | + | GTGACCTATGCACCAGACGTGCAAGAACTGTCAGAGGGCCGCTTCTCATGATAAGATCGGAAGAGCGGTTTCAG               |
| chr12 | 70925961  | 70926000  | PTPRB_9605   | + | GTGACCTATGCACCAGACGTGGCAAAAGGAAAGATTGAGCCTTTTTATAAATTTGCCTTAGATCGGAAGAGCGGTTTCAG         |
| chr12 | 70928442  | 70928481  | PTPRB_9606   | + | GTGACCTATGCACCAGACGTAGAGAGCAGGATAAAAAGGAACTGTCCAATGCAAACCTTAGATCGGAAGAGCGGTTTCAG         |
| chr12 | 70928746  | 70928785  | PTPRB_9607   | + | GTGACCTATGCACCAGACGTACAGACAGAAAAACATGAGTCCGAAAAGTACTCTTGTAGATCGGAAGAGCGGTTTCAG           |
| chr12 | 70929950  | 70929989  | PTPRB_9608   | + | GTGACCTATGCACCAGACGTTTTACAATATGGAGAGTCAAGAAACATGGCCCTTTCAGAAAGATCGGAAGAGCGGTTTCAG        |
| chr12 | 70932805  | 70932844  | PTPRB_9609   | + | GTGACCTATGCACCAGACGTAAATATGAGTTTGTAAGTGGAGAATGAAATAGAATAAAAGATCGGAAGAGCGGTTTCAG          |
| chr12 | 70933497  | 70933536  | PTPRB_9610   | + | GTGACCTATGCACCAGACGTAAATGAAAACAAACAGAAAAGAGTTACTGCAGAAAAGGAAAAGATCGGAAGAGCGGTTTCAG       |
| chr12 | 70933635  | 70933674  | PTPRB_9611   | + | GTGACCTATGCACCAGACGTAAAGCAAAAAGAGCAAGACTTTGTTGACAAATTTACATAAAGATCGGAAGAGCGGTTTCAG        |
| chr12 | 70933813  | 70933852  | PTPRB_9612   | + | GTGACCTATGCACCAGACGTAGGGAGATAACTTTTTATTCTGATTATGATACTTGGCTTGAAGATCGGAAGAGCGGTTTCAG       |
| chr12 | 70934748  | 70934787  | PTPRB_9613   | + | GTGACCTATGCACCAGACGTCCAGATAGAAAACAAACAGCAGGTGGGAAAATTAGTGTAGATCGGAAGAGCGGTTTCAG          |
| chr12 | 70938454  | 70938493  | PTPRB_9614   | + | GTGACCTATGCACCAGACGTAAACCGATTTATTTAAATATAAATAGTTGTTGAAACACAGTAGATCGGAAGAGCGGTTTCAG       |
| chr12 | 70946811  | 70946850  | PTPRB_9615   | + | GTGACCTATGCACCAGACGTAAACCCACAGTTAAGGACTGCCTTTCTGTGACTTAGGTGAGATCGGAAGAGCGGTTTCAG         |
| chr12 | 70949100  | 70949139  | PTPRB_9616   | + | GTGACCTATGCACCAGACGTAGGTGGGGAAGCAACAGAAAGACTGTCACACTCTGCTTTTCAGATCGGAAGAGCGGTTTCAG       |
| chr12 | 70949939  | 70949978  | PTPRB_9617   | + | GTGACCTATGCACCAGACGTGAGAGGAGGCAACACTTTTTCAGAACTCAGGGAGAATTTTTAGATCGGAAGAGCGGTTTCAG       |
| chr12 | 70953415  | 70953454  | PTPRB_9618   | + | GTGACCTATGCACCAGACGTGAGAAAAGTAAAAATCATAATACAGCTATGCCATAACAGATCGGAAGAGCGGTTTCAG           |
| chr12 | 70954725  | 70954764  | PTPRB_9619   | + | GTGACCTATGCACCAGACGTAGAAAAATGTTACTGAGAACAACAAACAGCAAGCATAGATCGGAAGAGCGGTTTCAG            |
| chr12 | 70956898  | 70956937  | PTPRB_9620   | + | GTGACCTATGCACCAGACGTGAGGAGCAAGAGAATGAGGGAGGGAATGCAGTGAGGAGAGATCGGAAGAGCGGTTTCAG          |
| chr12 | 70960495  | 70960534  | PTPRB_9621   | + | GTGACCTATGCACCAGACGTACAAGTGGAGCAACAAAATACAGATTTTACTACTTAGGTTAGATCGGAAGAGCGGTTTCAG        |
| chr12 | 70963729  | 70963768  | PTPRB_9622   | + | GTGACCTATGCACCAGACGTAAATAAATTTAAAGTCAATCAGATAAGACTTGTAGAAATGAACTGTGAGATCGGAAGAGCGGTTTCAG |
| chr12 | 70965080  | 70965119  | PTPRB_9623   | + | GTGACCTATGCACCAGACGTAAATGAGAAGACATTTCAAGAAAGGAACTGATCAGAGTTTAGATCGGAAGAGCGGTTTCAG        |
| chr12 | 70965878  | 70965917  | PTPRB_9624   | + | GTGACCTATGCACCAGACGTAAACAGAGTAACATAAATTTATGAATTCTGAGTGAGTAAGATCGGAAGAGCGGTTTCAG          |
| chr12 | 70970436  | 70970475  | PTPRB_9625   | + | GTGACCTATGCACCAGACGTGAAAAGTGGGGGCGGGGGGGGGGGAAAGGGGGATTCAAAGATCGGAAGAGCGGTTTCAG          |
| chr12 | 70975093  | 70975132  | PTPRB_9626   | + | GTGACCTATGCACCAGACGTAGACAGAAAGAAAACAAATGACACTTAGTACCTTAAAGAGATCGGAAGAGCGGTTTCAG          |
| chr12 | 70981058  | 70981097  | PTPRB_9627   | + | GTGACCTATGCACCAGACGTAGCAATGGATGGGTCTATTGATGGACTGAGGCATATTCAGATCGGAAGAGCGGTTTCAG          |
| chr12 | 70984024  | 70984063  | PTPRB_9628   | + | GTGACCTATGCACCAGACGTAAATGATGTCAAAAAGGAGATATTACAGACCAAAAAGTAAGATCGGAAGAGCGGTTTCAG         |

|       |           |           |              |   |                                                                                      |
|-------|-----------|-----------|--------------|---|--------------------------------------------------------------------------------------|
| chr12 | 70986336  | 70986375  | PTPRB_9629   | + | GTGACCTATGCACCAGACGTAAGAACAGAAAGGAGACTTTTACTCAGGATCTCTCACAGAGATCGGAAGAGCGGTTCCAG     |
| chr12 | 70988515  | 70988554  | PTPRB_9630   | + | GTGACCTATGCACCAGACGTAAAATGCATGTCCAAATGTCATTAATAATTCCCTTATAGGAGATCGGAAGAGCGGTTCCAG    |
| chr12 | 71003130  | 71003169  | PTPRB_9631   | + | GTGACCTATGCACCAGACGTATCAGACACAACAGTTAAAGTCCACAGTCTGGACTGCCTAAGATCGGAAGAGCGGTTCCAG    |
| chr12 | 71003605  | 71003644  | PTPRB_9632   | + | GTGACCTATGCACCAGACGTAGTTAAGATCCAGAGGAGACCCAGGGGGCTGGACGTGGGAAGATCGGAAGAGCGGTTCCAG    |
| chr12 | 71016437  | 71016476  | PTPRB_9633   | + | GTGACCTATGCACCAGACGTGAAAAGATAGTTGCAAAGATTATTCTCATGTTTTATGAATAGATCGGAAGAGCGGTTCCAG    |
| chr12 | 71029857  | 71029896  | PTPRB_9634   | + | GTGACCTATGCACCAGACGTAAAAGCTCATAAAGCACTATGTAGCAAATATGAGGCCAAGATCGGAAGAGCGGTTCCAG      |
| chr12 | 71031186  | 71031225  | PTPRB_9635   | + | GTGACCTATGCACCAGACGTGCAACTGTTCCATGTTGGGAAAAAATAAATCTCAGATCGGAAGAGCGGTTCCAG           |
| chr6  | 117622311 | 117622350 | ROS1_9636    | + | GTGACCTATGCACCAGACGTGGGGAAAGATGGGAAAGTAAATAGCAATTGGATATAAATTAAGATCGGAAGAGCGGTTCCAG   |
| chr6  | 117630102 | 117630141 | ROS1_9637    | + | GTGACCTATGCACCAGACGTAGAGGGTTTGTCTTAATTATACCTATTACAAACACCAGGAGATCGGAAGAGCGGTTCCAG     |
| chr6  | 117638446 | 117638485 | ROS1_9638    | + | GTGACCTATGCACCAGACGTGAAAAGACACAGGCTGGATGATATGACAGAAGCAGGAGTCCAGATCGGAAGAGCGGTTCCAG   |
| chr6  | 117639426 | 117639465 | ROS1_9639    | + | GTGACCTATGCACCAGACGTAAAAACAAGTCAGGAATCAGTATAGCAGACATTTCTGTGAGATCGGAAGAGCGGTTCCAG     |
| chr6  | 117641204 | 117641243 | ROS1_9640    | + | GTGACCTATGCACCAGACGTGCAACATTTTGTCTCCCCCCTCCACATATATAGGTTGAGATCGGAAGAGCGGTTCCAG       |
| chr6  | 117642568 | 117642607 | ROS1_9641    | + | GTGACCTATGCACCAGACGTAAAAATGACAATAATTCACAAAATAAAATATTGCTTCTTTTATAGATCGGAAGAGCGGTTCCAG |
| chr6  | 117645589 | 117645628 | ROS1_9642    | + | GTGACCTATGCACCAGACGTAAATCAGAAAAAGAAATTAATTCATAGATAAAAGCTAAGTAGATCGGAAGAGCGGTTCCAG    |
| chr6  | 117647588 | 117647627 | ROS1_9643    | + | GTGACCTATGCACCAGACGTAAATAATACAGAAAATATACATGACATATACCTGTATAGATCGGAAGAGCGGTTCCAG       |
| chr6  | 117650620 | 117650659 | ROS1_9644    | + | GTGACCTATGCACCAGACGTAAAAAGAAAATATTGGTTGATATGTTTGAAGTAAATCTAGATCGGAAGAGCGGTTCCAG      |
| chr6  | 117658514 | 117658553 | ROS1_9645    | + | GTGACCTATGCACCAGACGTAAAGTCTCGATTAAATTTTTTTTCTCTAAGAAAATATTAGATCGGAAGAGCGGTTCCAG      |
| chr6  | 117662485 | 117662524 | ROS1_9646    | + | GTGACCTATGCACCAGACGTAAAAAGCAACTTGTCTTAAAGTTGAGGCCTTGCACTTGAGATCGGAAGAGCGGTTCCAG      |
| chr6  | 117662806 | 117662845 | ROS1_9647    | + | GTGACCTATGCACCAGACGTTAGCAAGGAATGATAAAGGATGCTGCAATAGCACTGAAAAGAGATCGGAAGAGCGGTTCCAG   |
| chr6  | 117663718 | 117663757 | ROS1_9648    | + | GTGACCTATGCACCAGACGTTTTTTAAAAATCAACATCTTATTTTTAACATTTTATACAAGATCGGAAGAGCGGTTCCAG     |
| chr6  | 117665436 | 117665475 | ROS1_9649    | + | GTGACCTATGCACCAGACGTAAAGAAACAAAAGATTAAATATCTATACTATATATAGAGATCGGAAGAGCGGTTCCAG       |
| chr6  | 117674343 | 117674382 | ROS1_9650    | + | GTGACCTATGCACCAGACGTGATAAGGAATATAAAGAACAATAAATTAATCTTACATTTTATAGATCGGAAGAGCGGTTCCAG  |
| chr6  | 117678089 | 117678128 | ROS1_9651    | + | GTGACCTATGCACCAGACGTAAAAAAGTCCCCCAACTTAATGAGTAAAATACATCATTAGATCGGAAGAGCGGTTCCAG      |
| chr6  | 117679183 | 117679222 | ROS1_9652    | + | GTGACCTATGCACCAGACGTGGTAGACACAGCCAAAGAGAGATGGTTATTTTTTAAAGATCGGAAGAGCGGTTCCAG        |
| chr6  | 117681185 | 117681224 | ROS1_9653    | + | GTGACCTATGCACCAGACGTAAAAACATGTAGATAATATGCATGAGAAAAGTACTTTAGATCGGAAGAGCGGTTCCAG       |
| chr6  | 117681579 | 117681618 | ROS1_9654    | + | GTGACCTATGCACCAGACGTGAAAACAAAATTCATTGATGAGTTCTCCGTGGCAACAGATCGGAAGAGCGGTTCCAG        |
| chr6  | 117684039 | 117684078 | ROS1_9655    | + | GTGACCTATGCACCAGACGTGAGGGACAGGTTAGAGCAGAAAAGAATATAAAGAATATAAAGAGATCGGAAGAGCGGTTCCAG  |
| chr6  | 117686378 | 117686417 | ROS1_9656    | + | GTGACCTATGCACCAGACGTACAGAAAAAATTTTCTCAGGGAGAGAATTATAAATAGATCGGAAGAGCGGTTCCAG         |
| chr6  | 117686915 | 117686954 | ROS1_9657    | + | GTGACCTATGCACCAGACGTAAAACAAAAGAAAATGAGGAAAGATAAGGATTTAGATCGGAAGAGCGGTTCCAG           |
| chr6  | 117687464 | 117687503 | ROS1_9658    | + | GTGACCTATGCACCAGACGTATAACACCAATTAGTGTGTTCTGGAGTGGTGGAGGATCGGAAGAGCGGTTCCAG           |
| chr6  | 117700333 | 117700372 | ROS1_9659    | + | GTGACCTATGCACCAGACGTAGTAAGGTAAGAAAATAAACCAATACATGTTTGAAGCATAGATCGGAAGAGCGGTTCCAG     |
| chr6  | 117704682 | 117704721 | ROS1_9660    | + | GTGACCTATGCACCAGACGTAAATTGATGGCCAGTTAATGGCTTCAAGTGACATTATTAGATCGGAAGAGCGGTTCCAG      |
| chr6  | 117707035 | 117707074 | ROS1_9661    | + | GTGACCTATGCACCAGACGTAGTGAATGATTAGCAGTTATTTTTTCATACATACCAACAAGATCGGAAGAGCGGTTCCAG     |
| chr6  | 117708173 | 117708212 | ROS1_9662    | + | GTGACCTATGCACCAGACGTAAAAAGAAATAAAAGAAACATCAGGAAAAGCAACTTTAGATCGGAAGAGCGGTTCCAG       |
| chr6  | 117709208 | 117709247 | ROS1_9663    | + | GTGACCTATGCACCAGACGTAAAACCAAGGATTTCCATAAATTCACCTACAGCCTCATCTAGATCGGAAGAGCGGTTCCAG    |
| chr6  | 117711020 | 117711059 | ROS1_9664    | + | GTGACCTATGCACCAGACGTAAACAAAAGAAACCTCATGAGATTGAGTCCAAAGGTTGATGAGATCGGAAGAGCGGTTCCAG   |
| chr6  | 117714495 | 117714534 | ROS1_9665    | + | GTGACCTATGCACCAGACGTAAAAATATACCGGTAGGATTAGCATCTGTCTATACAGCAAGATCGGAAGAGCGGTTCCAG     |
| chr6  | 117715520 | 117715559 | ROS1_9666    | + | GTGACCTATGCACCAGACGTGCAAGTGCACACACATTATATATAACAACCAGGACAAGATCGGAAGAGCGGTTCCAG        |
| chr6  | 117715912 | 117715951 | ROS1_9667    | + | GTGACCTATGCACCAGACGTCAACACAATTTGCAGACAGGTAGACCAACCACAGGTACACAGATCGGAAGAGCGGTTCCAG    |
| chr6  | 117717438 | 117717477 | ROS1_9668    | + | GTGACCTATGCACCAGACGTAAACAATTTGGAGAGACGTGTTTCATGTCATGGTGTGAAAGATCGGAAGAGCGGTTCCAG     |
| chr6  | 117718290 | 117718329 | ROS1_9669    | + | GTGACCTATGCACCAGACGTAAATGGTATGATGATGACAGAAAAATGTGCAAGCATGATAGATCGGAAGAGCGGTTCCAG     |
| chr6  | 117724451 | 117724490 | ROS1_9670    | + | GTGACCTATGCACCAGACGTGAGTGATCAATCATCAGCATTATAGAATCAGCACCCCAAGATCGGAAGAGCGGTTCCAG      |
| chr6  | 117725602 | 117725641 | ROS1_9671    | + | GTGACCTATGCACCAGACGTAAACAAGATTACTACCACGCACTCCTGTCCATCAGGCAGATCGGAAGAGCGGTTCCAG       |
| chr6  | 117730816 | 117730855 | ROS1_9672    | + | GTGACCTATGCACCAGACGTGAGGGAGCATTGACAGTCAAGGGCACTTGATACTGGTTTTAGATCGGAAGAGCGGTTCCAG    |
| chr6  | 117737491 | 117737530 | ROS1_9673    | + | GTGACCTATGCACCAGACGTCAATAACAGACAATGGTGAATGATTGAAAGAAATGTGACTTTAGATCGGAAGAGCGGTTCCAG  |
| chr6  | 117739680 | 117739719 | ROS1_9674    | + | GTGACCTATGCACCAGACGTGAAGGAGGTAGTAACACAGCCATCAGTACTGGTTCGAAGATCGGAAGAGCGGTTCCAG       |
| chr6  | 117746830 | 117746869 | ROS1_9675    | + | GTGACCTATGCACCAGACGTATGGCAGTTTTTAGATGGCCGGTCTAATTTTTCTCATTTAGATCGGAAGAGCGGTTCCAG     |
| chr6  | 166826386 | 166826425 | RPS6KA2_9676 | + | GTGACCTATGCACCAGACGTGAAGACAAGGGTGAGAGCCGCGGCGCTCACTCCAGGGGTAGATCGGAAGAGCGGTTCCAG     |
| chr6  | 166827430 | 166827469 | RPS6KA2_9677 | + | GTGACCTATGCACCAGACGTAGGTCATGAGAGTGGGGGGATGGTTGGATCAATTTGTGCTAGATCGGAAGAGCGGTTCCAG    |
| chr6  | 166831841 | 166831880 | RPS6KA2_9678 | + | GTGACCTATGCACCAGACGTAGACAAATTTGTGGTAAAGACCTGTTATTTTACAACCTAAAGATCGGAAGAGCGGTTCCAG    |
| chr6  | 166833457 | 166833496 | RPS6KA2_9679 | + | GTGACCTATGCACCAGACGTACGACAGGACACCCGCTTCACTAAGGACATTCAGATCGGAAGAGCGGTTCCAG            |
| chr6  | 166836916 | 166836955 | RPS6KA2_9680 | + | GTGACCTATGCACCAGACGTGAAGGCAGATGCCTACTTGGGGGTGAGGACTGAGCAGGATCGGAAGAGCGGTTCCAG        |
| chr6  | 166844110 | 166844149 | RPS6KA2_9681 | + | GTGACCTATGCACCAGACGTGAGAAGGGGCGCACACGTCAACCAGGCTGGTTGCTGTGAAAGATCGGAAGAGCGGTTCCAG    |
| chr6  | 166845989 | 166846028 | RPS6KA2_9682 | + | GTGACCTATGCACCAGACGTCAACAGCACATGGCAGTGAGGGGTCTACTTTAGGCTTTCGGAGATCGGAAGAGCGGTTCCAG   |
| chr6  | 166862348 | 166862387 | RPS6KA2_9683 | + | GTGACCTATGCACCAGACGTACCAGAGAGAAGAAGATTGTCGGAACCTCACACGAGGGGAGATCGGAAGAGCGGTTCCAG     |
| chr6  | 166864732 | 166864771 | RPS6KA2_9684 | + | GTGACCTATGCACCAGACGTGAGGGGAGGTTAGATGCCACGAAAGCTGGGTGACCTAGATCGGAAGAGCGGTTCCAG        |
| chr6  | 166873050 | 166873089 | RPS6KA2_9685 | + | GTGACCTATGCACCAGACGTGAAGGAAAGCAAGACAGGCCTGAGGATGCACAGACATTGAGATCGGAAGAGCGGTTCCAG     |
| chr6  | 166883404 | 166883443 | RPS6KA2_9686 | + | GTGACCTATGCACCAGACGTACAGAAATGATCATCAGAACAATAAAGATGGGGTCTAGATCGGAAGAGCGGTTCCAG        |

|       |           |           |              |   |                                                                                       |
|-------|-----------|-----------|--------------|---|---------------------------------------------------------------------------------------|
| chr6  | 166902420 | 166902459 | RPS6KA2_9687 | + | GTGACCTATGCACCAGACGTAGATCCTATTTTAGGATCTATTTTAGGAGAACAAGGACAAAGATCGGAAGAGCGGTTTCAG     |
| chr6  | 166904240 | 166904279 | RPS6KA2_9688 | + | GTGACCTATGCACCAGACGTACACAGAGCACAGTGAGTTTCATTCATCCAGATGGACCCGGAGATCGGAAGAGCGGTTTCAG    |
| chr6  | 166912149 | 166912188 | RPS6KA2_9689 | + | GTGACCTATGCACCAGACGTACACAGCACACACTGCCTCAGTCTCTGGGTGTGTTCCGGAGATCGGAAGAGCGGTTTCAG      |
| chr6  | 166914423 | 166914462 | RPS6KA2_9690 | + | GTGACCTATGCACCAGACGTGGGAGAGAAAACAGATGCTTTAGAAAAGAGACCCAGCTGCAGATCGGAAGAGCGGTTTCAG     |
| chr6  | 166921781 | 166921820 | RPS6KA2_9691 | + | GTGACCTATGCACCAGACGTGACAGACCCGCAATTTTGACAGCTTGTCGAATGTCTGTGGAGATCGGAAGAGCGGTTTCAG     |
| chr6  | 166923856 | 166923895 | RPS6KA2_9692 | + | GTGACCTATGCACCAGACGTAAAAGATAAAGGCTTTTCATGAGGCGAGAAATAAGAGTTCTAGATCGGAAGAGCGGTTTCAG    |
| chr6  | 166944812 | 166944851 | RPS6KA2_9693 | + | GTGACCTATGCACCAGACGTGAAACCGGAAACATCAGAAACCCGTAAGACTTCAAACCTCCAGATCGGAAGAGCGGTTTCAG    |
| chr6  | 166952283 | 166952322 | RPS6KA2_9694 | + | GTGACCTATGCACCAGACGTGCGGCACGGGTGAGAAAACACCCGCGAGGAGTCCCTCAGAAGATCGGAAGAGCGGTTTCAG     |
| chr6  | 167040518 | 167040557 | RPS6KA2_9695 | + | GTGACCTATGCACCAGACGTCCAGCCCGGAGCAGCCGACGGGCCGGGGACGCGCATCCAGATCGGAAGAGCGGTTTCAG       |
| chr6  | 167271758 | 167271797 | RPS6KA2_9696 | + | GTGACCTATGCACCAGACGTAGATAGATGTTAAAGATGGTTAGCATTGCCATGTGTTTGTAGATCGGAAGAGCGGTTTCAG     |
| chr6  | 167275669 | 167275708 | RPS6KA2_9697 | + | GTGACCTATGCACCAGACGTTCCTTTCTGCTGGTCGAGTATTGATAGTAGGAAAGGAAAAGATCGGAAGAGCGGTTTCAG      |
| chr1  | 17345464  | 17345503  | SDHB_9698    | + | GTGACCTATGCACCAGACGTGAGAAAAGAAATCAATAACAAATGATAACTGAAACTGAAAGAGATCGGAAGAGCGGTTTCAG    |
| chr1  | 17349236  | 17349275  | SDHB_9699    | + | GTGACCTATGCACCAGACGTGAGGATGATTAGCTGAGCTGCCAATCAACAGGCCAGAGCCGAGATCGGAAGAGCGGTTTCAG    |
| chr1  | 17350580  | 17350619  | SDHB_9700    | + | GTGACCTATGCACCAGACGTAGAAAAGAGAGGCAGGAGCTTGTGACGGGAGAGACTCTGCAGATCGGAAGAGCGGTTTCAG     |
| chr1  | 17355242  | 17355281  | SDHB_9701    | + | GTGACCTATGCACCAGACGTCCACACATTAACACATCCTCACCCATATCCGGAATCAGTCAGATCGGAAGAGCGGTTTCAG     |
| chr1  | 17359651  | 17359690  | SDHB_9702    | + | GTGACCTATGCACCAGACGTAAAATATCCAGTGGTATTTATGTAACGTTCAACCTCCCTAAGATCGGAAGAGCGGTTTCAG     |
| chr1  | 17371394  | 17371433  | SDHB_9703    | + | GTGACCTATGCACCAGACGTAAAAGTTACAAAAAGGAAAAAATTAGAAATACAAGAGATCGGAAGAGCGGTTTCAG          |
| chr1  | 17380525  | 17380564  | SDHB_9704    | + | GTGACCTATGCACCAGACGTGACGTGACCGTCCAGCCACCCCTTAACCCGAGGTCGCTCTCCGAGATCGGAAGAGCGGTTTCAG  |
| chr12 | 53775608  | 53775647  | SP1_9705     | + | GTGACCTATGCACCAGACGTATCATAGAGTGGGAAAGGTTGAGAAAGATGTAATATTCAGATCGGAAGAGCGGTTTCAG       |
| chr12 | 53777417  | 53777456  | SP1_9706     | + | GTGACCTATGCACCAGACGTCAATCTTGTCATTATTGGGAACCACTTAGCATCGTAAGATCGGAAGAGCGGTTTCAG         |
| chr12 | 53800548  | 53800587  | SP1_9707     | + | GTGACCTATGCACCAGACGTCCAGCCAGTTTCTTACAATATAAAGAAAATTAATAGATAGATCGGAAGAGCGGTTTCAG       |
| chr12 | 53803356  | 53803395  | SP1_9708     | + | GTGACCTATGCACCAGACGTGCCTATGGGAGAGAAAATAGTAATAGACTAGAATGAAAAGATCGGAAGAGCGGTTTCAG       |
| chr12 | 53805035  | 53805074  | SP1_9709     | + | GTGACCTATGCACCAGACGTCCGGGCCAGAGACATATGGCCATACCCCTAACCCGGAGATCGGAAGAGCGGTTTCAG         |
| chr12 | 53776282  | 53776321  | SP1_9710     | + | GTGACCTATGCACCAGACGTGGCAACAGCTGCAGTTTGTCTGCTGGCCACTGGGGCCCAAGTCCAGATCGGAAGAGCGGTTTCAG |
| chr12 | 53776660  | 53776699  | SP1_9711     | + | GTGACCTATGCACCAGACGTGGTATCATACAAGCCAGTCCAGCTCCTTTTTACCAAGATCGGAAGAGCGGTTTCAG          |
| chr12 | 53777038  | 53777077  | SP1_9712     | + | GTGACCTATGCACCAGACGTAGAACCTCCAGCTTCAGGCTGTTCCAACTCTGGTCCCATAGATCGGAAGAGCGGTTTCAG      |
| chr15 | 39874136  | 39874175  | THBS1_9713   | + | GTGACCTATGCACCAGACGTGTGGCACCTTTAGGGGAAGGAGGGACAGGAAGAGGTCGATAGATCGGAAGAGCGGTTTCAG     |
| chr15 | 39874964  | 39875003  | THBS1_9714   | + | GTGACCTATGCACCAGACGTTCCTCTGAGCCCTGCTCCGTGGGATCATCTGCTAGACAGGAGATCGGAAGAGCGGTTTCAG     |
| chr15 | 39875904  | 39875943  | THBS1_9715   | + | GTGACCTATGCACCAGACGTCTCTATTTTAGGCCACATAGGGAATCGGGGGAATCCAGATCGGAAGAGCGGTTTCAG         |
| chr15 | 39876399  | 39876438  | THBS1_9716   | + | GTGACCTATGCACCAGACGTCTGACACCCAGCCGTTAGACTGAACCCCTGGAAGGTTTATAGATCGGAAGAGCGGTTTCAG     |
| chr15 | 39876634  | 39876673  | THBS1_9717   | + | GTGACCTATGCACCAGACGTTCACCAGCCAGAATAAGAATCGACGGCTTTTGTGTTGAACAGATCGGAAGAGCGGTTTCAG     |
| chr15 | 39877775  | 39877814  | THBS1_9718   | + | GTGACCTATGCACCAGACGTCAAATGGCAGTAGCTATTTCTCAGTACTAGGTCAGTCTAAGATCGGAAGAGCGGTTTCAG      |
| chr15 | 39879732  | 39879771  | THBS1_9719   | + | GTGACCTATGCACCAGACGTGAGCCCTCAGGGACGTGGAGAATGACCTGTCTTGTGATCGGAAGAGCGGTTTCAG           |
| chr15 | 39880430  | 39880469  | THBS1_9720   | + | GTGACCTATGCACCAGACGTGGTCGCTGCAAGGGTGAGCATGGGCAGCAGCTCTGCCAAGATCGGAAGAGCGGTTTCAG       |
| chr15 | 39880911  | 39880950  | THBS1_9721   | + | GTGACCTATGCACCAGACGTGACGCCAGGATGAAACCCAGCCAGGAGCTTTGCTCTTTTACAGATCGGAAGAGCGGTTTCAG    |
| chr15 | 39881298  | 39881337  | THBS1_9722   | + | GTGACCTATGCACCAGACGTGATGGGGCTCCGAGTTTCTGGATCTAGGAAAGCAGCTAACAGATCGGAAGAGCGGTTTCAG     |
| chr15 | 39881566  | 39881605  | THBS1_9723   | + | GTGACCTATGCACCAGACGTCTAGACGAGTAACCCAGAGGACAGGAGGAGCTGTCTTGACAGATCGGAAGAGCGGTTTCAG     |
| chr15 | 39882235  | 39882274  | THBS1_9724   | + | GTGACCTATGCACCAGACGTGTCCCTTTGTGTCCTCCAGAAAAGAGGGCCCATCACCTTATAGATCGGAAGAGCGGTTTCAG    |
| chr15 | 39882835  | 39882874  | THBS1_9725   | + | GTGACCTATGCACCAGACGTTCCTATCCCTTTTTCATCTTTTTCAGTTACGACACAGCCAGATCGGAAGAGCGGTTTCAG      |
| chr15 | 39883562  | 39883601  | THBS1_9726   | + | GTGACCTATGCACCAGACGTGCCGTGATCAGAGGCCCGCGGGAGACAGGAGATGCACAGAGATCGGAAGAGCGGTTTCAG      |
| chr15 | 39883835  | 39883874  | THBS1_9727   | + | GTGACCTATGCACCAGACGTGGACTCCTTTTCAGAGTCTTTTCAGTAACTGTTGGAAATATCAGATCGGAAGAGCGGTTTCAG   |
| chr15 | 39885014  | 39885053  | THBS1_9728   | + | GTGACCTATGCACCAGACGTGGAGCCACTTTCTAAGACAGGGACTGCTGGCACAGCTGTGAGATCGGAAGAGCGGTTTCAG     |
| chr15 | 39885439  | 39885478  | THBS1_9729   | + | GTGACCTATGCACCAGACGTAGTTCTTAGATCCTAAGAGACTGATGCATACATGGGAAAAGATCGGAAGAGCGGTTTCAG      |
| chr15 | 39885880  | 39885919  | THBS1_9730   | + | GTGACCTATGCACCAGACGTAAAGCCTGGAACAGAGAGAGGACTTATGGGTGCCTGACTAAGATCGGAAGAGCGGTTTCAG     |
| chr15 | 39886408  | 39886447  | THBS1_9731   | + | GTGACCTATGCACCAGACGTACTGACCTTTTACTTACAGTCACTAGGGGACAAAAGATCGGAAGAGCGGTTTCAG           |
| chr15 | 39886652  | 39886691  | THBS1_9732   | + | GTGACCTATGCACCAGACGTATCAGCTGAATGTACCTGAGACTGATGATCTCTATTTTACAGATCGGAAGAGCGGTTTCAG     |
| chr15 | 39887581  | 39887620  | THBS1_9733   | + | GTGACCTATGCACCAGACGTGTTGATTGAAAGACTGATCATAAACCAATGCTGGTATTGCAGATCGGAAGAGCGGTTTCAG     |
| chr15 | 39874684  | 39874723  | THBS1_9734   | + | GTGACCTATGCACCAGACGTGTGCCAATGGCAAGGCGGGCACCCCTGGACCTCAGCTGAAGATCGGAAGAGCGGTTTCAG      |
| chr1  | 3599005   | 3599044   | TP73_9735    | + | GTGACCTATGCACCAGACGTGGCTGGCCAGAGCTGGGGGCCCCCTGGGAGGACTCTAGATCGGAAGAGCGGTTTCAG         |
| chr1  | 3599755   | 3599794   | TP73_9736    | + | GTGACCTATGCACCAGACGTGGGCTGCCCTCTGCAAGAGGACTGGAGTGGGGACAACAAAAGATCGGAAGAGCGGTTTCAG     |
| chr1  | 3607519   | 3607558   | TP73_9737    | + | GTGACCTATGCACCAGACGTCCGCCATCATAGGATCTTCGCGGACTTTGCGGGGAAAGATCGGAAGAGCGGTTTCAG         |
| chr1  | 3638782   | 3638821   | TP73_9738    | + | GTGACCTATGCACCAGACGTCCAGCTCCTCTGCCACGGTGGCAGTTTCCGAGCATCCAGATCGGAAGAGCGGTTTCAG        |
| chr1  | 3640044   | 3640083   | TP73_9739    | + | GTGACCTATGCACCAGACGTAGCCAGGCTGTGCCAGGGCCCTGCAGTCAGCTGTACGGGAGATCGGAAGAGCGGTTTCAG      |
| chr1  | 3643799   | 3643838   | TP73_9740    | + | GTGACCTATGCACCAGACGTGGCACAGGGGTGGAGGTGGGACAGGGCTGGGACAGGCAGAGATCGGAAGAGCGGTTTCAG      |
| chr1  | 3644345   | 3644384   | TP73_9741    | + | GTGACCTATGCACCAGACGTGGCCAGGGAACTGGACCGTGTGGGAGGAGAAGGGGACAAGATCGGAAGAGCGGTTTCAG       |
| chr1  | 3644792   | 3644831   | TP73_9742    | + | GTGACCTATGCACCAGACGTGCTCCTGCCACGGCAGCCGGAGACCTGCCCTCACCTGTGCAGATCGGAAGAGCGGTTTCAG     |
| chr1  | 3646023   | 3646062   | TP73_9743    | + | GTGACCTATGCACCAGACGTCTAGCCACAGTCTAGTGTGGGAAAGGACATGCTTAAGATCGGAAGAGCGGTTTCAG          |
| chr1  | 3646723   | 3646762   | TP73_9744    | + | GTGACCTATGCACCAGACGTGGGACGTGCCGGCCAGGGCAGGGGAGGCCACTAGATCGGAAGAGCGGTTTCAG             |



|       |           |           |             |   |                                                                                      |
|-------|-----------|-----------|-------------|---|--------------------------------------------------------------------------------------|
| chr1  | 3647640   | 3647679   | TP73_9745   | + | GTGACCTATGCACCAGACGTTGCCGAGGGCCTGAGCATGTGCTGTACCCTGTCTGTTCAAGATCGGAAGAGCGGTTTCAG     |
| chr1  | 3648130   | 3648169   | TP73_9746   | + | GTGACCTATGCACCAGACGTTGGGTGGACCCCGCTCTGCAGAGGCAGTAGCTGGAGGGGCCAGATCGGAAGAGCGGTTTCAG   |
| chr1  | 3648131   | 3648170   | TP73_9747   | + | GTGACCTATGCACCAGACGTTGGGTGGACCCCGCTCTGCAGAGGCAGTAGCTGGAGGGGGCCAGATCGGAAGAGCGGTTTCAG  |
| chr1  | 3649337   | 3649376   | TP73_9748   | + | GTGACCTATGCACCAGACGTTGCAGTACCGCATGACCATCTGGCGGGCCTGCAGGACCTGAGATCGGAAGAGCGGTTTCAG    |
| chr1  | 3649654   | 3649693   | TP73_9749   | + | GTGACCTATGCACCAGACGTTGGCTGCAGCTCGGCCACCGCCAGAGACCACAGATCGGCAGATCGGAAGAGCGGTTTCAG     |
| chr12 | 121746505 | 121746544 | ANAPC5_9750 | + | GTGACCTATGCACCAGACGTTGGGAAAAATAACACACACATTTAACTCAACCCTTCCAGTAAGATCGGAAGAGCGGTTTCAG   |
| chr12 | 121747677 | 121747716 | ANAPC5_9751 | + | GTGACCTATGCACCAGACGTTAGCATGTGCCACTGTACATACCACAAACCCTGCCCCTTCAGATCGGAAGAGCGGTTTCAG    |
| chr12 | 121756238 | 121756277 | ANAPC5_9752 | + | GTGACCTATGCACCAGACGTAGAGGAAAAACAGGATGAGAAGATCCACCACCACATCTCAGATCGGAAGAGCGGTTTCAG     |
| chr12 | 121756422 | 121756461 | ANAPC5_9753 | + | GTGACCTATGCACCAGACGTATCAAAATGAACACAAGTGTTTAACTAGTCACTTTGAGGAGATCGGAAGAGCGGTTTCAG     |
| chr12 | 121757632 | 121757671 | ANAPC5_9754 | + | GTGACCTATGCACCAGACGTAAAAAAACACAATTAAGTACAAAATGGCGAATGTTTCATCTAGATCGGAAGAGCGGTTTCAG   |
| chr12 | 121758273 | 121758312 | ANAPC5_9755 | + | GTGACCTATGCACCAGACGTAAACACACAATTTGATCAGCATAACCTGTGTTGAATCCACAAGATCGGAAGAGCGGTTTCAG   |
| chr12 | 121765045 | 121765084 | ANAPC5_9756 | + | GTGACCTATGCACCAGACGTAGAGGGAACGATTTTCCCTTTCAGCAGCAGACCTGGCTGCAGATCGGAAGAGCGGTTTCAG    |
| chr12 | 121766272 | 121766311 | ANAPC5_9757 | + | GTGACCTATGCACCAGACGTAGGGACTGTATCCAGGGAGGCCGAGGTACTAAGGGACAAGATCGGAAGAGCGGTTTCAG      |
| chr12 | 121766311 | 121766350 | ANAPC5_9758 | + | GTGACCTATGCACCAGACGTAGATATACCCACGACCCAAGATAGAGATTACATGACAGAAAGATCGGAAGAGCGGTTTCAG    |
| chr12 | 121768486 | 121768525 | ANAPC5_9759 | + | GTGACCTATGCACCAGACGTAAATCATCAAAATATATATAACAGTGGCAATGGCTGATGAGATCGGAAGAGCGGTTTCAG     |
| chr12 | 121769242 | 121769281 | ANAPC5_9760 | + | GTGACCTATGCACCAGACGTACTAAACATTAATATCCCATAAATAACACAACATGCATAGATCGGAAGAGCGGTTTCAG      |
| chr12 | 121773537 | 121773576 | ANAPC5_9761 | + | GTGACCTATGCACCAGACGTTAAATCAATGTATTTAAACGCTGTAATATCTCTGGTAGATCGGAAGAGCGGTTTCAG        |
| chr12 | 121775206 | 121775245 | ANAPC5_9762 | + | GTGACCTATGCACCAGACGTAAAAATGGTACTCAGTAGAAAGGTCATAAACAATGATCGGAAGAGCGGTTTCAG           |
| chr12 | 121779883 | 121779922 | ANAPC5_9763 | + | GTGACCTATGCACCAGACGTTAAAAAAACAAAAATAGTAAAGAAATACAAAAAGTAAAAAGATCGGAAGAGCGGTTTCAG     |
| chr12 | 121783845 | 121783884 | ANAPC5_9764 | + | GTGACCTATGCACCAGACGTAGACGAGAGACAAGGGGAAAGCATTAACTGACATCCAGGCAGATCGGAAGAGCGGTTTCAG    |
| chr12 | 121784809 | 121784848 | ANAPC5_9765 | + | GTGACCTATGCACCAGACGTCGTGAATGAGAAAATCGAGGTGCATATTTTGAAGAGCCCTTAGATCGGAAGAGCGGTTTCAG   |
| chr12 | 121784819 | 121784858 | ANAPC5_9766 | + | GTGACCTATGCACCAGACGTAAATCGAGGTGCATATTTTGAAGAGCCCTTTGAATAATTAGATCGGAAGAGCGGTTTCAG     |
| chr12 | 121785695 | 121785734 | ANAPC5_9767 | + | GTGACCTATGCACCAGACGTGAGAGATAGGGAGGTATGGATTTAAAGAGCTGGAGATGAGATCGGAAGAGCGGTTTCAG      |
| chr12 | 121790154 | 121790193 | ANAPC5_9768 | + | GTGACCTATGCACCAGACGTGAACTAAGTCTCGGGCCGCGGCTGCGGCCAGTTGTCAGATCGGAAGAGCGGTTTCAG        |
| chr3  | 142168455 | 142168494 | ATR_9769    | + | GTGACCTATGCACCAGACGTGAAACATAAAAACAAAAACAGATGTTAATAATTTGGAATTAGATCGGAAGAGCGGTTTCAG    |
| chr3  | 142172086 | 142172125 | ATR_9770    | + | GTGACCTATGCACCAGACGTAACAATATTATGGTATGATGTTATCTTTGCAAGAAGAAAAGATCGGAAGAGCGGTTTCAG     |
| chr3  | 142176608 | 142176647 | ATR_9771    | + | GTGACCTATGCACCAGACGTATACATTTTTATTACAAACTAACAAATGTTAGAATTTAAAAAAGATCGGAAGAGCGGTTTCAG  |
| chr3  | 142178236 | 142178275 | ATR_9772    | + | GTGACCTATGCACCAGACGTGAGTGATATCCATTAATCACATCAGCCAATGAAAAAGGAGATCGGAAGAGCGGTTTCAG      |
| chr3  | 142180943 | 142180982 | ATR_9773    | + | GTGACCTATGCACCAGACGTATACACATAAAATTTAAAAACAAGTAACTCAAAATTCAGATCGGAAGAGCGGTTTCAG       |
| chr3  | 142184093 | 142184132 | ATR_9774    | + | GTGACCTATGCACCAGACGTATGAGTTTATATATTGAAATTTAGGGCCAAAATTTCTGTGATAAGATCGGAAGAGCGGTTTCAG |
| chr3  | 142185386 | 142185425 | ATR_9775    | + | GTGACCTATGCACCAGACGTTAAATAGTGCATTTAATTTGTTTTACCTTAAATCCACTAGATCGGAAGAGCGGTTTCAG      |
| chr3  | 142186921 | 142186960 | ATR_9776    | + | GTGACCTATGCACCAGACGTAAAGAGTTAAATGTCATAAAAAGAGTTTTATACAGGATTTAGATCGGAAGAGCGGTTTCAG    |
| chr3  | 142188422 | 142188461 | ATR_9777    | + | GTGACCTATGCACCAGACGTAAATAAGTTTAAAAACAATAAAGGAAAGAGAAAAATCAGAGATCGGAAGAGCGGTTTCAG     |
| chr3  | 142189036 | 142189075 | ATR_9778    | + | GTGACCTATGCACCAGACGTATAGACAAGAACACTATTAGCATAGCTGTCATTTTTATAAGATCGGAAGAGCGGTTTCAG     |
| chr3  | 142204135 | 142204174 | ATR_9779    | + | GTGACCTATGCACCAGACGTGAAACATAGGATACCTCACTCAAGAAAATCCACGCTATGCTAGATCGGAAGAGCGGTTTCAG   |
| chr3  | 142212164 | 142212203 | ATR_9780    | + | GTGACCTATGCACCAGACGTAAAGGCAACAATAAGCCTTTTAAATTTAAAAACATACTTCTAGATCGGAAGAGCGGTTTCAG   |
| chr3  | 142215373 | 142215412 | ATR_9781    | + | GTGACCTATGCACCAGACGTTAAACAACACATTGGTGAGAGAGACCATTGGTAAAGGTACAAGATCGGAAGAGCGGTTTCAG   |
| chr3  | 142216045 | 142216084 | ATR_9782    | + | GTGACCTATGCACCAGACGTATAGAGCCTATGTTAAAATGTTATCATATTCAGCCTTATAGATCGGAAGAGCGGTTTCAG     |
| chr3  | 142217627 | 142217666 | ATR_9783    | + | GTGACCTATGCACCAGACGTAATGAAGAGTCAAGAAATGTCACGGTAGCTGGGTCCAAGAAGATCGGAAGAGCGGTTTCAG    |
| chr3  | 142218571 | 142218610 | ATR_9784    | + | GTGACCTATGCACCAGACGTTAAACCCATATCAACTAACTTTAATTTTAAAGGTGACAAGATCGGAAGAGCGGTTTCAG      |
| chr3  | 142224156 | 142224195 | ATR_9785    | + | GTGACCTATGCACCAGACGTTGATTAATAAAAAACAATCAAAAACAAGAAAAAACAACAATGAGATCGGAAGAGCGGTTTCAG  |
| chr3  | 142226962 | 142227001 | ATR_9786    | + | GTGACCTATGCACCAGACGTTAAAAAGTTGAGTAAATTAAGACTTATAAGATAAAATTTAAGATCGGAAGAGCGGTTTCAG    |
| chr3  | 142232491 | 142232530 | ATR_9787    | + | GTGACCTATGCACCAGACGTTAAATGTGTAGACAGTAACACACTTTCACATATTGATTAAGATCGGAAGAGCGGTTTCAG     |
| chr3  | 142234368 | 142234407 | ATR_9788    | + | GTGACCTATGCACCAGACGTGAAAAATTTGTTTTATTAAAAAGATAAAATCCACCTGTTTTAGATCGGAAGAGCGGTTTCAG   |
| chr3  | 142238637 | 142238676 | ATR_9789    | + | GTGACCTATGCACCAGACGTATATTTTACATTTGTAAGTCCACAGTGAAGCAGATAACGCAGATCGGAAGAGCGGTTTCAG    |
| chr3  | 142241694 | 142241733 | ATR_9790    | + | GTGACCTATGCACCAGACGTTAAAAAAAGTAAAAAATAAAATTCACAGATGCTATAAATTTAGATCGGAAGAGCGGTTTCAG   |
| chr3  | 142243052 | 142243091 | ATR_9791    | + | GTGACCTATGCACCAGACGTAGTAGAAAGAAAATTTATACGTAATTTCTACAAAAGTAAAGATCGGAAGAGCGGTTTCAG     |
| chr3  | 142254058 | 142254097 | ATR_9792    | + | GTGACCTATGCACCAGACGTAGCACAGAGACAGAACTTATAATCAACTATTTTTAAACAAGATCGGAAGAGCGGTTTCAG     |
| chr3  | 142255054 | 142255093 | ATR_9793    | + | GTGACCTATGCACCAGACGTGTTGGAATAAAAAGAATTTATTGCCAAAGAATGAATCTAGATCGGAAGAGCGGTTTCAG      |
| chr3  | 142259887 | 142259926 | ATR_9794    | + | GTGACCTATGCACCAGACGTAAAGTAGTCTTCAGAGTAAAGCTTATAAACATGCTGCCAGAGATCGGAAGAGCGGTTTCAG    |
| chr3  | 142261610 | 142261649 | ATR_9795    | + | GTGACCTATGCACCAGACGTTAAACAGATAAATGTAAGCTTTACAGAGATTGAATTTCTAGATCGGAAGAGCGGTTTCAG     |
| chr3  | 142266763 | 142266802 | ATR_9796    | + | GTGACCTATGCACCAGACGTTGACATGTTAAAAAAAATTTTTCTTCTCATCTAATATCCAGATCGGAAGAGCGGTTTCAG     |
| chr3  | 142268526 | 142268565 | ATR_9797    | + | GTGACCTATGCACCAGACGTATGCAACAATTACAAAAAGTACATTTGTCTGGGTGAAAAAGATCGGAAGAGCGGTTTCAG     |
| chr3  | 142272593 | 142272632 | ATR_9798    | + | GTGACCTATGCACCAGACGTTAAAATTAACCTGTTAAAGAAAATTTTAGAGCTAGTTGACAGATCGGAAGAGCGGTTTCAG    |
| chr3  | 142272868 | 142272907 | ATR_9799    | + | GTGACCTATGCACCAGACGTAGAGTATACAATACCTAATTTAACAATATAAAATGTCAAAGGATCGGAAGAGCGGTTTCAG    |
| chr3  | 142274992 | 142275031 | ATR_9800    | + | GTGACCTATGCACCAGACGTTAAAAAAGTACTAAACTTTTCTGCCTAATTTTGTGGTAGATCGGAAGAGCGGTTTCAG       |
| chr3  | 142277629 | 142277668 | ATR_9801    | + | GTGACCTATGCACCAGACGTTACAAAAAAGTCAATAATTTTCTTAACTCATATAGATCGGAAGAGCGGTTTCAG           |
| chr3  | 142278294 | 142278333 | ATR_9802    | + | GTGACCTATGCACCAGACGTTACATTTTTGTTAAAAAAATTGAATTAAGATTGAATTTGATAGATCGGAAGAGCGGTTTCAG   |

chr3 142279307 142279346 ATR\_9803 + GTGACCTATGCACCAGACGTGAATATAGTAGAGATATTCATATGCAATATAAATTTGGAGATCGGAAGAGCGGTTTCAG  
chr3 142280274 142280313 ATR\_9804 + GTGACCTATGCACCAGACGTAAAAATAATTTCCAGAAATATTTCTTAGAAAAATATATTTAGATCGGAAGAGCGGTTTCAG  
chr3 142281962 142282001 ATR\_9805 + GTGACCTATGCACCAGACGTAAACAAAAAGATATTAATAAACAAGTATATCCGAAGTGCAGATCGGAAGAGCGGTTTCAG  
chr3 142285114 142285153 ATR\_9806 + GTGACCTATGCACCAGACGTAAAGATTCATTTAAAGAGTGCATGACAAATTAACAATGGTAGATCGGAAGAGCGGTTTCAG  
chr3 142287007 142287046 ATR\_9807 + GTGACCTATGCACCAGACGTAAATAAAGCTTTTAAATCCTTAAAGTCACTCAGTTTCATTAGATCGGAAGAGCGGTTTCAG  
chr3 142297557 142297596 ATR\_9808 + GTGACCTATGCACCAGACGTGAGGCACTAGTCAACCACGCCAACCGGGTTCCCGGGCGTAGATCGGAAGAGCGGTTTCAG  
chr3 142281523 142281562 ATR\_9809 + GTGACCTATGCACCAGACGTACCACACTTAGCAGAACACAACTATCTGCCAAAGTAAAGATCGGAAGAGCGGTTTCAG  
chr19 45252314 45252353 BCL3\_9810 + GTGACCTATGCACCAGACGTCCCGAGGGTCCCGGGCGGGTGGGATCCACACAGAGCATAGAGATCGGAAGAGCGGTTTCAG  
chr19 45254648 45254687 BCL3\_9811 + GTGACCTATGCACCAGACGTGCCCTATTAAGGGGAGGGGTGGTTGGGAAGACCAGCCGAGATCGGAAGAGCGGTTTCAG  
chr19 45260489 45260528 BCL3\_9812 + GTGACCTATGCACCAGACGTACCOCGGGGCACCGCTGGGCTGCCAGCGACCTGGAGTGCAGATCGGAAGAGCGGTTTCAG  
chr19 45260683 45260722 BCL3\_9813 + GTGACCTATGCACCAGACGTACTAGGAGCTGGGAGGGAGCGGGCCCTTAGCAGGGGCGGGAGATCGGAAGAGCGGTTTCAG  
chr19 45260991 45261030 BCL3\_9814 + GTGACCTATGCACCAGACGTCCCCCTGAGCCTCGCGCCACCCCTATCCTTGACCCCAAAGATCGGAAGAGCGGTTTCAG  
chr19 45261681 45261720 BCL3\_9815 + GTGACCTATGCACCAGACGTGCAGCTGGGACATGCCCTTGACACAGTGTGCCGCGGGAGATCGGAAGAGCGGTTTCAG  
chr19 45262883 45262922 BCL3\_9816 + GTGACCTATGCACCAGACGTGGGGCAGATCTTGGACTCATGAGGAGGGGCCCCCTGCCAGATCGGAAGAGCGGTTTCAG  
chr2 32582565 32582604 BIRC6\_9817 + GTGACCTATGCACCAGACGTGCAGCGCCGGGCGGGCGGAAGCCGGGAAAGAGCCGTGCAGATCGGAAGAGCGGTTTCAG  
chr2 32602848 32602887 BIRC6\_9818 + GTGACCTATGCACCAGACGTATAAGTATCAATGTGGTCCCTACTTAATGTAATCTTAGAAGATCGGAAGAGCGGTTTCAG  
chr2 32605369 32605408 BIRC6\_9819 + GTGACCTATGCACCAGACGTAAATAGATGGCTTTTGGGTTATATTACAATGGACACCAGATCGGAAGAGCGGTTTCAG  
chr2 32614022 32614061 BIRC6\_9820 + GTGACCTATGCACCAGACGTGACTTAACAAGAGTGACAGTGCAGATGAGATGATTAGTTTAGATCGGAAGAGCGGTTTCAG  
chr2 32617229 32617268 BIRC6\_9821 + GTGACCTATGCACCAGACGTAAATAAAAAAATACTTTTCTCAGTAGGCCCTTTGTAGCCAGATCGGAAGAGCGGTTTCAG  
chr2 32620672 32620711 BIRC6\_9822 + GTGACCTATGCACCAGACGTATGTTTCTGGGCATAATAGGCTAAGTCAAGTCAGTCGTGTAATAAGATCGGAAGAGCGGTTTCAG  
chr2 32626464 32626503 BIRC6\_9823 + GTGACCTATGCACCAGACGTATTTGAAGTAAACAATAGTAATTGAAAAAAGATCAGTTAGATCGGAAGAGCGGTTTCAG  
chr2 32626702 32626741 BIRC6\_9824 + GTGACCTATGCACCAGACGTGTTTGTAGTAGTATTAATAGATGTTACATGTTTTCCTAAGATCGGAAGAGCGGTTTCAG  
chr2 32631636 32631675 BIRC6\_9825 + GTGACCTATGCACCAGACGTAGTAGATATGATAATGATTTAAAAATCTTACACAGTTGAGATCGGAAGAGCGGTTTCAG  
chr2 32641242 32641281 BIRC6\_9826 + GTGACCTATGCACCAGACGTGATTATGTTACTAATACTTATAAATCCATGTATATGGAGATCGGAAGAGCGGTTTCAG  
chr2 32656169 32656208 BIRC6\_9827 + GTGACCTATGCACCAGACGTCCCAAGATAATTAATTTAAGTCCATCTTGTGTATTTGAGATCGGAAGAGCGGTTTCAG  
chr2 32658883 32658922 BIRC6\_9828 + GTGACCTATGCACCAGACGTATCAAAATTTATCTTTGAAGATTTTATTTGTGGTTGATTAGATCGGAAGAGCGGTTTCAG  
chr2 32660664 32660703 BIRC6\_9829 + GTGACCTATGCACCAGACGTATAGAGCTGTTGCCATGACAGTAAAGGAGTAGTGATAGATCGGAAGAGCGGTTTCAG  
chr2 32661263 32661302 BIRC6\_9830 + GTGACCTATGCACCAGACGTACATTTTACAAAAGCAAAATTAATAATACCACAGTTGTAAGATCGGAAGAGCGGTTTCAG  
chr2 32664765 32664804 BIRC6\_9831 + GTGACCTATGCACCAGACGTGCATTTTGAACAATAACAATACAGTTTAAACATTTGGAGATCGGAAGAGCGGTTTCAG  
chr2 32666541 32666580 BIRC6\_9832 + GTGACCTATGCACCAGACGTGCATTTGTTGTTATCTTACAGTAATGAAAGTGACAGATCGGAAGAGCGGTTTCAG  
chr2 32667305 32667344 BIRC6\_9833 + GTGACCTATGCACCAGACGTAAAAATTTGCTTACCCTGTTGATTGCCTTTTATAGTAAAGATCGGAAGAGCGGTTTCAG  
chr2 32667534 32667573 BIRC6\_9834 + GTGACCTATGCACCAGACGTAAAAAGTGAAGCATACTTTCTAGGTACACCTGCAATTAGATCGGAAGAGCGGTTTCAG  
chr2 32668667 32668706 BIRC6\_9835 + GTGACCTATGCACCAGACGTAAATTTAATCACAATAGTTATAGTCATATGGAACATCTAGATCGGAAGAGCGGTTTCAG  
chr2 32670747 32670786 BIRC6\_9836 + GTGACCTATGCACCAGACGTATCTAATGACTAATAATAGCGCTCTGAGTATGATCAAGATCGGAAGAGCGGTTTCAG  
chr2 32674007 32674046 BIRC6\_9837 + GTGACCTATGCACCAGACGTCTTTTAAAGGAAATCTGAAATGTTGTATCTTGATCTTGATCGGAAGAGCGGTTTCAG  
chr2 32679021 32679060 BIRC6\_9838 + GTGACCTATGCACCAGACGTGGTATATACCTTCTTTTATTATATACTTTATGCAGTAATAGATCGGAAGAGCGGTTTCAG  
chr2 32688460 32688499 BIRC6\_9839 + GTGACCTATGCACCAGACGTATTTGGCTCTTTGTTTCATGCTGCTCTAAACTTCAAAGCAGATCGGAAGAGCGGTTTCAG  
chr2 32689902 32689941 BIRC6\_9840 + GTGACCTATGCACCAGACGTAAAAATAGGTGTTGGCTTAGACATTTAAAAATATCTTGAGATCGGAAGAGCGGTTTCAG  
chr2 32692818 32692857 BIRC6\_9841 + GTGACCTATGCACCAGACGTAAAGAAAGTAAATGATACGCTTTCTATGTTTCTGACAAAAGATCGGAAGAGCGGTTTCAG  
chr2 32693190 32693229 BIRC6\_9842 + GTGACCTATGCACCAGACGTAGTGCAAATTTAATGTTATTGAAACTTTGTATTTATATAGATCGGAAGAGCGGTTTCAG  
chr2 32693862 32693901 BIRC6\_9843 + GTGACCTATGCACCAGACGTGGCTTACATTTTAAAGGCTGGAAATATACTTAGATGTTAAGATCGGAAGAGCGGTTTCAG  
chr2 32694693 32694732 BIRC6\_9844 + GTGACCTATGCACCAGACGTAAATGTTGGAGGTTTGTATTAAATGATGTGACTTTTCAGATCGGAAGAGCGGTTTCAG  
chr2 32695380 32695419 BIRC6\_9845 + GTGACCTATGCACCAGACGTAAAGCAGTGTCTTTAGTAAAAACAATATCCTGCAATAAGATCGGAAGAGCGGTTTCAG  
chr2 32696203 32696242 BIRC6\_9846 + GTGACCTATGCACCAGACGTGGAGAGGTTTCTGACAGGTATCAGAAGTTTAAATAATATAGATCGGAAGAGCGGTTTCAG  
chr2 32701423 32701462 BIRC6\_9847 + GTGACCTATGCACCAGACGTACTTTTCAATATAGTATCTCAGAAAAGTCAAGGATTAAGATCGGAAGAGCGGTTTCAG  
chr2 32703897 32703936 BIRC6\_9848 + GTGACCTATGCACCAGACGTATTTTTCTCATAGATGTGCAAAATACCTTGTCATTTAGATCGGAAGAGCGGTTTCAG  
chr2 32704696 32704735 BIRC6\_9849 + GTGACCTATGCACCAGACGTACATTATGTTTCTTCTTTATTCTATTAAATGGAACATGTAGATCGGAAGAGCGGTTTCAG  
chr2 32707661 32707700 BIRC6\_9850 + GTGACCTATGCACCAGACGTGTTTATATTTAAGACATATGCTATTCTTAAACAAGTCTAGATCGGAAGAGCGGTTTCAG  
chr2 32710837 32710876 BIRC6\_9851 + GTGACCTATGCACCAGACGTGACCATTTTTAGAGTATTCAGATGAATGATTCAGCTCTTAGATCGGAAGAGCGGTTTCAG  
chr2 32712879 32712918 BIRC6\_9852 + GTGACCTATGCACCAGACGTAGGAGAAATGGTGTATTTTACATATTATTGTTAGCTGGAGATCGGAAGAGCGGTTTCAG  
chr2 32713792 32713831 BIRC6\_9853 + GTGACCTATGCACCAGACGTTTAGGAGAAAAACATATGATCTAATAAGCAAGCTTAAAGATCGGAAGAGCGGTTTCAG  
chr2 32715229 32715268 BIRC6\_9854 + GTGACCTATGCACCAGACGTAAATTTATTCAATTAATCTGACATATACTTAGATGTTAAGATCGGAAGAGCGGTTTCAG  
chr2 32716636 32716675 BIRC6\_9855 + GTGACCTATGCACCAGACGTGTTTAGCCTGGCATATGCCAGACTATTCAATAAACAGTAAGATCGGAAGAGCGGTTTCAG  
chr2 32718745 32718784 BIRC6\_9856 + GTGACCTATGCACCAGACGTGTACTAATTTGTTCTGATATAGAAGTAACATGTAATTAGATCGGAAGAGCGGTTTCAG  
chr2 32725187 32725226 BIRC6\_9857 + GTGACCTATGCACCAGACGTAGAAATTAATCTTACCATTGCTCTGATACTATAACTGGAGATCGGAAGAGCGGTTTCAG  
chr2 32726966 32727005 BIRC6\_9858 + GTGACCTATGCACCAGACGTGCCAACACAGTTCAGTGATTCAAATAAATTTATTGCGAAGATCGGAAGAGCGGTTTCAG  
chr2 32727969 32728008 BIRC6\_9859 + GTGACCTATGCACCAGACGTATTTCAACTATCAATTTAAGTAAATGTAGATGATGATGATCGGAAGAGCGGTTTCAG  
chr2 32728314 32728353 BIRC6\_9860 + GTGACCTATGCACCAGACGTGTTTACTAAATCTTACTTATGTGAATTTACTAGTTTATTAGATCGGAAGAGCGGTTTCAG

|       |          |          |              |   |                                                                                                |
|-------|----------|----------|--------------|---|------------------------------------------------------------------------------------------------|
| chr2  | 32730283 | 32730322 | BIRC6_9861   | + | GTGACCTATGCACCAGACGTTTTTATAAAGAAGCATCATGAGAACAAGCTTTAATTTAGAAGATCGGAAGAGCGGTTTCAG              |
| chr2  | 32735072 | 32735111 | BIRC6_9862   | + | GTGACCTATGCACCAGACGCTACTTTGATATTTAAATGTTTACATATCTGTAAAGTAACAGAGATCGGAAGAGCGGTTTCAG             |
| chr2  | 32735712 | 32735751 | BIRC6_9863   | + | GTGACCTATGCACCAGACGTATTTTTTCATTTAATTAAGCACACACATGCACATAATCATGAGATCGGAAGAGCGGTTTCAG             |
| chr2  | 32738232 | 32738271 | BIRC6_9864   | + | GTGACCTATGCACCAGACGTTTTGTGAAATCTTTTTATCCCCAGTACTAGATCAGTTAAGATCGGAAGAGCGGTTTCAG                |
| chr2  | 32740848 | 32740887 | BIRC6_9865   | + | GTGACCTATGCACCAGACGTAAAATAACTTACATTTTTAGTTGTTTTATTACATAAGAAAGAGATCGGAAGAGCGGTTTCAG             |
| chr2  | 32743475 | 32743514 | BIRC6_9866   | + | GTGACCTATGCACCAGACGTAAACATTAATCATTGGCTGTGTATACATGTATTTTACAATAGATCGGAAGAGCGGTTTCAG              |
| chr2  | 32744024 | 32744063 | BIRC6_9867   | + | GTGACCTATGCACCAGACGTTTTAAGTATTTAGTTTGTAACTTTATGTTTTGATGTATAGATCGGAAGAGCGGTTTCAG                |
| chr2  | 32750097 | 32750136 | BIRC6_9868   | + | GTGACCTATGCACCAGACGTTATTTTTTATAATCTTGATTTTTGGTGTCTATAAAAAAGATCGGAAGAGCGGTTTCAG                 |
| chr2  | 32750706 | 32750745 | BIRC6_9869   | + | GTGACCTATGCACCAGACGTTCAATGAATAAACGTCAAAGAAATTTAGTAGCCTTAAAAAGATCGGAAGAGCGGTTTCAG               |
| chr2  | 32754902 | 32754941 | BIRC6_9870   | + | GTGACCTATGCACCAGACGTAAATACTACTTTAAAAAATTACAGACTGTCATACAAAAGAGGCAGATCGGAAGAGCGGTTTCAG           |
| chr2  | 32756629 | 32756668 | BIRC6_9871   | + | GTGACCTATGCACCAGACGTATTTCCCTAATCGAGTATATCATTCCATAGCTAAGCCCTTCAGATCGGAAGAGCGGTTTCAG             |
| chr2  | 32768619 | 32768658 | BIRC6_9872   | + | GTGACCTATGCACCAGACGTAGTATTAATTTTATCAACACATATGTGAATAGTTGTGTAAAGATCGGAAGAGCGGTTTCAG              |
| chr2  | 32770938 | 32770977 | BIRC6_9873   | + | GTGACCTATGCACCAGACGTTTTTAATTTAGTTTCAAGTTTAAACATTTAGTTTAAACAAATAGATTTAATTAAGATCGGAAGAGCGGTTTCAG |
| chr2  | 32774559 | 32774598 | BIRC6_9874   | + | GTGACCTATGCACCAGACGTCTGTAAATGTGTCTGTGGATGAATAATTTGTTTGCTTAAGATCGGAAGAGCGGTTTCAG                |
| chr2  | 32800444 | 32800483 | BIRC6_9875   | + | GTGACCTATGCACCAGACGTCAATGTTCAATTTCTCTTGAGTTGCTCTAACAATGTTTTAGATCGGAAGAGCGGTTTCAG               |
| chr2  | 32819138 | 32819177 | BIRC6_9876   | + | GTGACCTATGCACCAGACGTTTTCTCTATATGCCACTTTTCATTTGATGTAAGAGATGTTTAGATCGGAAGAGCGGTTTCAG             |
| chr2  | 32820222 | 32820261 | BIRC6_9877   | + | GTGACCTATGCACCAGACGTATTTTTGATTTGCTTAAGATCTCACITTCCTATTTTTTTAGATCGGAAGAGCGGTTTCAG               |
| chr2  | 32823046 | 32823085 | BIRC6_9878   | + | GTGACCTATGCACCAGACGTATGATAAAGCACTCCCTTATCTCCCTTGCTCATCTAGATCGGAAGAGCGGTTTCAG                   |
| chr2  | 32824978 | 32825017 | BIRC6_9879   | + | GTGACCTATGCACCAGACGTTGCAATTTTTGTTTCAAATGCCAATGATTGTATACAAAGAGATCGGAAGAGCGGTTTCAG               |
| chr2  | 32828161 | 32828200 | BIRC6_9880   | + | GTGACCTATGCACCAGACGTTTTCTGTGACATTTTCACTTAAGAAATAAAGAACTGTGAAGATCGGAAGAGCGGTTTCAG               |
| chr2  | 32832721 | 32832760 | BIRC6_9881   | + | GTGACCTATGCACCAGACGTAAAATTAGTGAAACTTTTGTAAAGACATTTTACAATAAGATCGGAAGAGCGGTTTCAG                 |
| chr2  | 32836660 | 32836699 | BIRC6_9882   | + | GTGACCTATGCACCAGACGTCTCTTAACAGGAGCCTTGTTGCTTTAAGAGTTGTGTAATAGATCGGAAGAGCGGTTTCAG               |
| chr2  | 32842982 | 32843021 | BIRC6_9883   | + | GTGACCTATGCACCAGACGTTGGGACTCATAGACAAAAGGCTCGAAGCACAAGCCAAAGATCGGAAGAGCGGTTTCAG                 |
| chr2  | 32724905 | 32724944 | BIRC6_9884   | + | GTGACCTATGCACCAGACGTTTTAATTTGTTAAAACATTTGTTAACTTTTAGTGCAGCTGCCATGATCGGAAGAGCGGTTTCAG           |
| chr2  | 32740457 | 32740496 | BIRC6_9885   | + | GTGACCTATGCACCAGACGTATAGATTTTCCAGGACAAAACAGGCGCCATCATGTCCAGATCGGAAGAGCGGTTTCAG                 |
| chr2  | 32640312 | 32640351 | BIRC6_9886   | + | GTGACCTATGCACCAGACGTATTATGAGTAAAGTTTGCATGATGATGGTTTTACTGTTAGATCGGAAGAGCGGTTTCAG                |
| chr2  | 32640777 | 32640816 | BIRC6_9887   | + | GTGACCTATGCACCAGACGTTGTACAGACTCCTTTAATAATTAGCCTGAGCAGAGGAATAGATCGGAAGAGCGGTTTCAG               |
| chr17 | 59761512 | 59761551 | BRIP1_9888   | + | GTGACCTATGCACCAGACGTAGAATTTAAGAGATTTAACTTTCTGCTCCTAGCTAACATAGATCGGAAGAGCGGTTTCAG               |
| chr17 | 59763537 | 59763576 | BRIP1_9889   | + | GTGACCTATGCACCAGACGTAGGTAAACCCAGGGAATTTGGTTACTTATTTAAAAGATCGGAAGAGCGGTTTCAG                    |
| chr17 | 59770884 | 59770923 | BRIP1_9890   | + | GTGACCTATGCACCAGACGTATCGGAAAAGTCAAATAAATTAATAACTCGGAATAAATCAGATCGGAAGAGCGGTTTCAG               |
| chr17 | 59820506 | 59820545 | BRIP1_9891   | + | GTGACCTATGCACCAGACGTAGAAAAAGCATATCCAAAATTTCTAGAAATTTGCTTATTTCAGATCGGAAGAGCGGTTTCAG             |
| chr17 | 59821963 | 59822002 | BRIP1_9892   | + | GTGACCTATGCACCAGACGTGAAAAGAAAAAATGATTTTTTGTGTGTCTAGCTAAACAAAAGATCGGAAGAGCGGTTTCAG              |
| chr17 | 59853934 | 59853973 | BRIP1_9893   | + | GTGACCTATGCACCAGACGTAAATGTCATTATTAGAGTTATGCCTGAAAAGGCATGGAAGATCGGAAGAGCGGTTTCAG                |
| chr17 | 59858377 | 59858416 | BRIP1_9894   | + | GTGACCTATGCACCAGACGTAGAAATGCTAATTAAGTGGCAAACATTTAAAACCTATGAGATCGGAAGAGCGGTTTCAG                |
| chr17 | 59861796 | 59861835 | BRIP1_9895   | + | GTGACCTATGCACCAGACGTTTACCATTAAGTATAGAGGGGTTGGGAGGAAATTTGAAAAGATCGGAAGAGCGGTTTCAG               |
| chr17 | 59871101 | 59871140 | BRIP1_9896   | + | GTGACCTATGCACCAGACGTATAAAAAAATTTGTGTCAACCAAGTATCATCCTTACACACACAGATCGGAAGAGCGGTTTCAG            |
| chr17 | 59876671 | 59876710 | BRIP1_9897   | + | GTGACCTATGCACCAGACGTAAAGAATTTTCTTGTAACATTTGGCAAATAGATTTAAAGATCGGAAGAGCGGTTTCAG                 |
| chr17 | 59878846 | 59878885 | BRIP1_9898   | + | GTGACCTATGCACCAGACGTATATGCATAACTGAAATGTGAACCAATATTAGCATAGAAGAGATCGGAAGAGCGGTTTCAG              |
| chr17 | 59886129 | 59886168 | BRIP1_9899   | + | GTGACCTATGCACCAGACGTGGAAGAAACGATAACTAATATCTAACTACCATAAAAAAGATCGGAAGAGCGGTTTCAG                 |
| chr17 | 59924592 | 59924631 | BRIP1_9900   | + | GTGACCTATGCACCAGACGTAGAACCAAAATGAAGTTAAGTGAAGTGAAGTTAACTAGATCGGAAGAGCGGTTTCAG                  |
| chr17 | 59926628 | 59926667 | BRIP1_9901   | + | GTGACCTATGCACCAGACGTTAATTTAAAAAAAACAGCATAAATAAATCTACAGGTAGGCAAGATCGGAAGAGCGGTTTCAG             |
| chr17 | 59934603 | 59934642 | BRIP1_9902   | + | GTGACCTATGCACCAGACGTAGAACAATCTATTTATAATATATCTAATTAATAAACATCAGATCGGAAGAGCGGTTTCAG               |
| chr17 | 59937279 | 59937318 | BRIP1_9903   | + | GTGACCTATGCACCAGACGTAGAACAATGAAAATAATAAACATATTAACTTTATAAAGAGATCGGAAGAGCGGTTTCAG                |
| chr17 | 59938911 | 59938950 | BRIP1_9904   | + | GTGACCTATGCACCAGACGTTGTTTATTTCAAGTTCTTAACACTACAACGAAATGAAAATGAGATCGGAAGAGCGGTTTCAG             |
| chr17 | 59761089 | 59761128 | BRIP1_9905   | + | GTGACCTATGCACCAGACGTAGACAATTCAGTCTGGATCCAGGCTTCTTCAGAACAGAGATCGGAAGAGCGGTTTCAG                 |
| chr16 | 88943694 | 88943733 | CBFA2T3_9906 | + | GTGACCTATGCACCAGACGTGCAGAGGGCTGACAGGCTCAGGCTGGGCTCGGCCACCCGATCAGATCGGAAGAGCGGTTTCAG            |
| chr16 | 88945879 | 88945918 | CBFA2T3_9907 | + | GTGACCTATGCACCAGACGTGCATGGCGAGGGCTGGCGGTCACATGGGCCATCCAGATGGAGATCGGAAGAGCGGTTTCAG              |
| chr16 | 88947207 | 88947246 | CBFA2T3_9908 | + | GTGACCTATGCACCAGACGTGGCCGGCGTCAACACAGGATGGGCCACGGCTGCCCTCCAGATCGGAAGAGCGGTTTCAG                |
| chr16 | 88947908 | 88947947 | CBFA2T3_9909 | + | GTGACCTATGCACCAGACGTGCGGCACAGCCTTCAAGACCTCAGAGGGACCGGGACGCACAGATCGGAAGAGCGGTTTCAG              |
| chr16 | 88949180 | 88949219 | CBFA2T3_9910 | + | GTGACCTATGCACCAGACGTGGGAGGTGCACGCTTAGTCCCACCCACAGCCAGTCTCTGAGATCGGAAGAGCGGTTTCAG               |
| chr16 | 88951688 | 88951727 | CBFA2T3_9911 | + | GTGACCTATGCACCAGACGTGAGCAGGTGGGGCGAGGGCAGTGGACATGGATGAAACCGAGATCGGAAGAGCGGTTTCAG               |
| chr16 | 88952561 | 88952600 | CBFA2T3_9912 | + | GTGACCTATGCACCAGACGTGGAAGGAGGGCTGGTGGTACGATGCAGGGGTGCACAGCCAGATCGGAAGAGCGGTTTCAG               |
| chr16 | 88958390 | 88958429 | CBFA2T3_9913 | + | GTGACCTATGCACCAGACGTGAAAACCCACCTCACATCAGCACCCTCGGCATGTGAGCCAGATCGGAAGAGCGGTTTCAG               |
| chr16 | 88958904 | 88958943 | CBFA2T3_9914 | + | GTGACCTATGCACCAGACGTGAAGCGGACATGAGGACACAAAGGTGATGGTGACAACAAGATCGGAAGAGCGGTTTCAG                |
| chr16 | 88964571 | 88964610 | CBFA2T3_9915 | + | GTGACCTATGCACCAGACGTAAATAAGAAAGAACACGCTGTGAGGAGGGCGTGGGCAGGAGAGATCGGAAGAGCGGTTTCAG             |
| chr16 | 88968043 | 88968082 | CBFA2T3_9916 | + | GTGACCTATGCACCAGACGTTTGGCTTTCCTGTCCACTGGGGCTGCGACCAACGGAGAAAAGATCGGAAGAGCGGTTTCAG              |
| chr16 | 88968075 | 88968114 | CBFA2T3_9917 | + | GTGACCTATGCACCAGACGTGGAAGAAAGACCTGCGTGAAGAGGCTAAGTGCAAAAGAGATCGGAAGAGCGGTTTCAG                 |
| chr16 | 89043226 | 89043265 | CBFA2T3_9918 | + | GTGACCTATGCACCAGACGTACCCCTCAGGGGCCAACCTGGAGCCAGGACAGGCTCTACAGATCGGAAGAGCGGTTTCAG               |

|       |           |           |            |   |                                                                                    |
|-------|-----------|-----------|------------|---|------------------------------------------------------------------------------------|
| chr1  | 193091472 | 193091511 | CDC73_9919 | + | GTGACCTATGCACCAGACGTCATGGCTGTGGCCAGGGGTGGCAGGGCAGAGTTGGGCGCAGATCGGAAGAGCGGTTCCAG   |
| chr1  | 193104594 | 193104633 | CDC73_9920 | + | GTGACCTATGCACCAGACGTTTGCATATTTATATTGAACCTTTCAGAAAGCCATTCCAAAAAGATCGGAAGAGCGGTTCCAG |
| chr1  | 193104730 | 193104769 | CDC73_9921 | + | GTGACCTATGCACCAGACGTTGTATTTAAACAATTTTATTTATATTGTTATTGAAATTGAGATCGGAAGAGCGGTTCCAG   |
| chr1  | 193107314 | 193107353 | CDC73_9922 | + | GTGACCTATGCACCAGACGTTTTTTAAGTAGAAAAGTAGGTAGTTAGATATATGTAAGAGAGATCGGAAGAGCGGTTCCAG  |
| chr1  | 193111207 | 193111246 | CDC73_9923 | + | GTGACCTATGCACCAGACGTTATTTACTCATTGAGGTGAGAGAGAGAGAGAGAAGATCGGAAGAGCGGTTCCAG         |
| chr1  | 193117106 | 193117145 | CDC73_9924 | + | GTGACCTATGCACCAGACGTTTACTGCTTTACAGTAGATTAATGAAGTTGCCACTTATAGATCGGAAGAGCGGTTCCAG    |
| chr1  | 193119523 | 193119562 | CDC73_9925 | + | GTGACCTATGCACCAGACGTTAACTCTTATCTTCCCGTAGTTGGTTGGTTGTTGACTTGGATCGGAAGAGCGGTTCCAG    |
| chr1  | 193121585 | 193121624 | CDC73_9926 | + | GTGACCTATGCACCAGACGTTTGGCTGTAGATGTTCTTTTGTCCAGGGATTTTATGTGAAGATCGGAAGAGCGGTTCCAG   |
| chr1  | 193172993 | 193173032 | CDC73_9927 | + | GTGACCTATGCACCAGACGTAGAACTTTGCTTTTTGTTTTCTTCAAAGATCGTAACAGAGATCGGAAGAGCGGTTCCAG    |
| chr1  | 193181241 | 193181280 | CDC73_9928 | + | GTGACCTATGCACCAGACGTGCATATGATTTAAACTTAACCTTAAAAAGTAAATGATTGAGATCGGAAGAGCGGTTCCAG   |
| chr1  | 193181618 | 193181657 | CDC73_9929 | + | GTGACCTATGCACCAGACGTTATTAACACTACCTGTACGTAGGATATTGAGATACCATGAGATCGGAAGAGCGGTTCCAG   |
| chr1  | 193202295 | 193202334 | CDC73_9930 | + | GTGACCTATGCACCAGACGTCCTATATATATCTTTCCAGAGTGTGAACCCAAGAGATCGGAAGAGCGGTTCCAG         |
| chr1  | 193205497 | 193205536 | CDC73_9931 | + | GTGACCTATGCACCAGACGTCCTTTGTATTTACTGTATCCAGATAGAAAATGTTCTCATTAGATCGGAAGAGCGGTTCCAG  |
| chr1  | 193219012 | 193219051 | CDC73_9932 | + | GTGACCTATGCACCAGACGTTTCTAAATATGCTTGTGTGTTTTATTGTAATTTTCTAGATCGGAAGAGCGGTTCCAG      |
| chr1  | 193219853 | 193219892 | CDC73_9933 | + | GTGACCTATGCACCAGACGTTCCCTCCATTTCTGGAAATTGAGACTCAAGCTTTATGAATTAGATCGGAAGAGCGGTTCCAG |
| chr5  | 68530879  | 68530918  | CDK7_9934  | + | GTGACCTATGCACCAGACGTCGTGAAGGACGGGGAGGGGCCCAAGCGGACAGCCCGCGCAGATCGGAAGAGCGGTTCCAG   |
| chr5  | 68531291  | 68531330  | CDK7_9935  | + | GTGACCTATGCACCAGACGTTTTTATGTTGTTTTAAAGTCTCCTTGAAGATGCTGTATAGATCGGAAGAGCGGTTCCAG    |
| chr5  | 68550507  | 68550546  | CDK7_9936  | + | GTGACCTATGCACCAGACGTTCAAACCTGTTACTGGGATTTGGGACTCTGCCTTTTCTTAAGATCGGAAGAGCGGTTCCAG  |
| chr5  | 68551366  | 68551405  | CDK7_9937  | + | GTGACCTATGCACCAGACGTTGATTCCTGGAGAAATCCTTTGTCCAGTTTATCAAACAAGATCGGAAGAGCGGTTCCAG    |
| chr5  | 68553991  | 68554030  | CDK7_9938  | + | GTGACCTATGCACCAGACGTTAATATTGCTTCTTTATACTAGTCAAGTTTTATATAGCCAAGATCGGAAGAGCGGTTCCAG  |
| chr5  | 68555774  | 68555813  | CDK7_9939  | + | GTGACCTATGCACCAGACGTCCTAAAGCTACATGTGCAGGAGTTGATCAGAAATGAGCAAGATCGGAAGAGCGGTTCCAG   |
| chr5  | 68558142  | 68558181  | CDK7_9940  | + | GTGACCTATGCACCAGACGTATTAATGTACGCACCTTAATATTGTTGTTGCAGTTATTTGAGATCGGAAGAGCGGTTCCAG  |
| chr5  | 68565131  | 68565170  | CDK7_9941  | + | GTGACCTATGCACCAGACGTATGCATTTTCTTAAATGTAATTAGGACTCTGTAAGTTAGATCGGAAGAGCGGTTCCAG     |
| chr5  | 68568879  | 68568918  | CDK7_9942  | + | GTGACCTATGCACCAGACGTTGATCTTTTATACTGAAATATAAAAATAATCTTAACAGATCGGAAGAGCGGTTCCAG      |
| chr5  | 68572528  | 68572567  | CDK7_9943  | + | GTGACCTATGCACCAGACGTCACCTTTTAAAGAAATTAATGAATTGAAAACTCCAAAAGATCGGAAGAGCGGTTCCAG     |
| chr5  | 68572973  | 68573012  | CDK7_9944  | + | GTGACCTATGCACCAGACGTGGACAACATTTACTACTGAGGGAAAATAGCCAAAAGCAAGATCGGAAGAGCGGTTCCAG    |
| chr17 | 57697545  | 57697584  | CLTC_9945  | + | GTGACCTATGCACCAGACGTGCCCGGCTGGTGAGGGCTGTGGAGAAGGTGGTAGAAGGAGATCGGAAGAGCGGTTCCAG    |
| chr17 | 57725038  | 57725077  | CLTC_9946  | + | GTGACCTATGCACCAGACGTTAATTTTATGAAGAAGAGGTTTGAACAACCGGTTGTAGATCGGAAGAGCGGTTCCAG      |
| chr17 | 57725773  | 57725812  | CLTC_9947  | + | GTGACCTATGCACCAGACGTCCTTTGGTAATTTTAAATGAGAATCTGTATTGGCTTTAGATCGGAAGAGCGGTTCCAG     |
| chr17 | 57728688  | 57728727  | CLTC_9948  | + | GTGACCTATGCACCAGACGTCAAATAAATGACTTTTTTAAAAATCTCTCCTCTTAAAGAAGATCGGAAGAGCGGTTCCAG   |
| chr17 | 57733399  | 57733438  | CLTC_9949  | + | GTGACCTATGCACCAGACGTCCTGAAACTTAAGCAATAAAAATAAGATAACCTGATGAGTTAGATCGGAAGAGCGGTTCCAG |
| chr17 | 57737960  | 57737999  | CLTC_9950  | + | GTGACCTATGCACCAGACGTATGAAAATGAAGTTGTGCATGACATTAATCCATTGTTAATAAGATCGGAAGAGCGGTTCCAG |
| chr17 | 57739015  | 57739054  | CLTC_9951  | + | GTGACCTATGCACCAGACGTTTATGTTGACATAATCTTGTCTTTGGTTGCATTAATATGAAGATCGGAAGAGCGGTTCCAG  |
| chr17 | 57741366  | 57741405  | CLTC_9952  | + | GTGACCTATGCACCAGACGTTGAAACACATCTCAGCATGAATTCATTGAAGCATGACAAGATCGGAAGAGCGGTTCCAG    |
| chr17 | 57742281  | 57742320  | CLTC_9953  | + | GTGACCTATGCACCAGACGTAAAAATATTTGTAGAAGCTGATGAAATGGAGAGTGAGATCGGAAGAGCGGTTCCAG       |
| chr17 | 57743612  | 57743651  | CLTC_9954  | + | GTGACCTATGCACCAGACGTTAATGCTTTTTAGGCATGTTTCCAACTTGTTTAGTAATAGATCGGAAGAGCGGTTCCAG    |
| chr17 | 57744016  | 57744055  | CLTC_9955  | + | GTGACCTATGCACCAGACGTTTCTTACCTAATAGATGGTGTAGTTGTGATTAATAGGTAAGATCGGAAGAGCGGTTCCAG   |
| chr17 | 57744349  | 57744388  | CLTC_9956  | + | GTGACCTATGCACCAGACGTGTTTTGAGTTTTTAAAAAAGTACTTAAGGTAGCCAAGAAGATCGGAAGAGCGGTTCCAG    |
| chr17 | 57746312  | 57746351  | CLTC_9957  | + | GTGACCTATGCACCAGACGTTTGGAGTAATGTGTTTTCTGGTTGGATTCCAGGTTAGCAGTAGATCGGAAGAGCGGTTCCAG |
| chr17 | 57751144  | 57751183  | CLTC_9958  | + | GTGACCTATGCACCAGACGTTGTAGTAAATGTAAGGTAATCTTACTATAGATTTTATAGATCGGAAGAGCGGTTCCAG     |
| chr17 | 57752215  | 57752254  | CLTC_9959  | + | GTGACCTATGCACCAGACGTTTAAACAGGATAAGTACTTTCTTAACATGGCAATAGATCGGAAGAGCGGTTCCAG        |
| chr17 | 57754560  | 57754599  | CLTC_9960  | + | GTGACCTATGCACCAGACGTCAGCTGAATATGTAGAGAAGCTGCATTTTTAAAAACCTGAGATCGGAAGAGCGGTTCCAG   |
| chr17 | 57756891  | 57756930  | CLTC_9961  | + | GTGACCTATGCACCAGACGTCAAATGTGTTATGGCTGTCAGTAAAAATATACATTTTATAGATCGGAAGAGCGGTTCCAG   |
| chr17 | 57758429  | 57758468  | CLTC_9962  | + | GTGACCTATGCACCAGACGTAGAGGGATCCATTTGGCTATTATAGTCAGTCTTTAATAAAAAGATCGGAAGAGCGGTTCCAG |
| chr17 | 57758850  | 57758889  | CLTC_9963  | + | GTGACCTATGCACCAGACGTAGATTACCTAAGTTGAATTAACACTAAACTGTGCTATGAGGAGATCGGAAGAGCGGTTCCAG |
| chr17 | 57759211  | 57759250  | CLTC_9964  | + | GTGACCTATGCACCAGACGTTTACCTTATGTTTGAACCTCATAAAATGATTAAGATCGGAAGAGCGGTTCCAG          |
| chr17 | 57759800  | 57759839  | CLTC_9965  | + | GTGACCTATGCACCAGACGTTTTTTCAGATTTAAGAAAACTAGTTGGGCTACTTGATTAGATCGGAAGAGCGGTTCCAG    |
| chr17 | 57760165  | 57760204  | CLTC_9966  | + | GTGACCTATGCACCAGACGTTCCAAAGTTTGGTGAAGAATTAAGAAACGCTATTTAAACAGATCGGAAGAGCGGTTCCAG   |
| chr17 | 57760386  | 57760425  | CLTC_9967  | + | GTGACCTATGCACCAGACGTGACTTTTTATATGACCTGAGATCTTTTACCATAGATATTCTAGATCGGAAGAGCGGTTCCAG |
| chr17 | 57760634  | 57760673  | CLTC_9968  | + | GTGACCTATGCACCAGACGTATTGTAACACAGTGAAGCAACTGTGTAGTTAAAACATGATGATCGGAAGAGCGGTTCCAG   |
| chr17 | 57760908  | 57760947  | CLTC_9969  | + | GTGACCTATGCACCAGACGTTCTCAGAAGATAAAGGATTAGAAGGAGAAGCTCATTAAAGATCGGAAGAGCGGTTCCAG    |
| chr17 | 57761128  | 57761167  | CLTC_9970  | + | GTGACCTATGCACCAGACGTAATTTTAAACCAAAGCTTACATGCAAGGAATTAGGACATAAGATCGGAAGAGCGGTTCCAG  |
| chr17 | 57761357  | 57761396  | CLTC_9971  | + | GTGACCTATGCACCAGACGTTTTGATCTTGCACATAATCTCAAGACTCATAAAGTTATGTAGATCGGAAGAGCGGTTCCAG  |
| chr17 | 57762598  | 57762637  | CLTC_9972  | + | GTGACCTATGCACCAGACGTTTGGGGGCGAGGGCTGTTTTAAACCAGGCCTAAAATGGTATAGATCGGAAGAGCGGTTCCAG |
| chr17 | 57763180  | 57763219  | CLTC_9973  | + | GTGACCTATGCACCAGACGTTTCTAAGTGTATTCAGAAGTATTTCTTGCATGTAATAAGATCGGAAGAGCGGTTCCAG     |
| chr17 | 57768083  | 57768122  | CLTC_9974  | + | GTGACCTATGCACCAGACGTTCTGTAACCTCAAAAAATTCATTAGCAAAATTTAATAAGATCGGAAGAGCGGTTCCAG     |
| chr17 | 57771224  | 57771263  | CLTC_9975  | + | GTGACCTATGCACCAGACGTTGATCCTGTAGTCACATTTTCTGACTGAAACATCGTCTAGATCGGAAGAGCGGTTCCAG    |
| chr8  | 113237170 | 113237209 | CSMD3_9976 | + | GTGACCTATGCACCAGACGTTGATGATTAGCTATGTGTTAACTTTCTCCAGAAACAAGATCGGAAGAGCGGTTCCAG      |

|      |           |           |             |   |                                                                                     |
|------|-----------|-----------|-------------|---|-------------------------------------------------------------------------------------|
| chr8 | 113243872 | 113243911 | CSMD3_9977  | + | GTGACCTATGCACCAGACGTTTAAACAGCCTAAATATACTTGAATACTGGCCATAGCTATAAGATCGGAAGAGCGGTTTCAG  |
| chr8 | 113246717 | 113246756 | CSMD3_9978  | + | GTGACCTATGCACCAGACGCTAAGGACATTTTAGTCTACTTAACTTTGTAAATAGTTATAAGATCGGAAGAGCGGTTTCAG   |
| chr8 | 113249588 | 113249627 | CSMD3_9979  | + | GTGACCTATGCACCAGACGTATTAATATACCACACATTAATTTTACAATGCCATATAAAAGATCGGAAGAGCGGTTTCAG    |
| chr8 | 113256813 | 113256852 | CSMD3_9980  | + | GTGACCTATGCACCAGACGTAAAAGAGAACAATGTAATTTTCTATAGATATGTTAAGAAGATCGGAAGAGCGGTTTCAG     |
| chr8 | 113259371 | 113259410 | CSMD3_9981  | + | GTGACCTATGCACCAGACGTTTAAAGAGAGGAAAAAATATTCCCCTACAACTTCAAATAAGATCGGAAGAGCGGTTTCAG    |
| chr8 | 113266566 | 113266605 | CSMD3_9982  | + | GTGACCTATGCACCAGACGTGATTAAGATATTAGTCTTTAAATTTACAATAGATAAGATCGGAAGAGCGGTTTCAG        |
| chr8 | 113267667 | 113267706 | CSMD3_9983  | + | GTGACCTATGCACCAGACGTAAAAGAGCCTTATATCAAGATTAGTATACAGCAGAAAGATCGGAAGAGCGGTTTCAG       |
| chr8 | 113276052 | 113276091 | CSMD3_9984  | + | GTGACCTATGCACCAGACGTATTAAGAGTATTAGACACAGCTGTTGAAATATCCTGAGCAGATCGGAAGAGCGGTTTCAG    |
| chr8 | 113277830 | 113277869 | CSMD3_9985  | + | GTGACCTATGCACCAGACGTTGGATTAGAAGAGCAGATGTTTAAAGATGAGGCATGTTTAAAGATCGGAAGAGCGGTTTCAG  |
| chr8 | 113293590 | 113293629 | CSMD3_9986  | + | GTGACCTATGCACCAGACGTAAGTGTTTAAGAGTATATATAAAAAATGCAATCAGAAATAGATCGGAAGAGCGGTTTCAG    |
| chr8 | 113299486 | 113299525 | CSMD3_9987  | + | GTGACCTATGCACCAGACGTGTACAGTTCAAGTTAACCAATTTCCATAAACATTTATTAAGATCGGAAGAGCGGTTTCAG    |
| chr8 | 113303935 | 113303974 | CSMD3_9988  | + | GTGACCTATGCACCAGACGTGACAATTTTGAACATATGTTTGAATAATATACATATAAGATCGGAAGAGCGGTTTCAG      |
| chr8 | 113304950 | 113304989 | CSMD3_9989  | + | GTGACCTATGCACCAGACGTGTGGCAGGAGGACAGGGAAGGAAACACAGAAAAAATATAGATCGGAAGAGCGGTTTCAG     |
| chr8 | 113308246 | 113308285 | CSMD3_9990  | + | GTGACCTATGCACCAGACGTTTATAAAGTAATATTTTAACTGTTGATTTGTTTTATTTAGATCGGAAGAGCGGTTTCAG     |
| chr8 | 113314206 | 113314245 | CSMD3_9991  | + | GTGACCTATGCACCAGACGTATAAATAAAAAATCCTTAAAGATATAGTCAAGCTGCAAGATCGGAAGAGCGGTTTCAG      |
| chr8 | 113317155 | 113317194 | CSMD3_9992  | + | GTGACCTATGCACCAGACGTACCAAAGGGTGAATTTGCTAACAAATCACTATATCTCAACAGATCGGAAGAGCGGTTTCAG   |
| chr8 | 113318432 | 113318471 | CSMD3_9993  | + | GTGACCTATGCACCAGACGTATACACAAGCAAATCGTATAAACAGAAAAATGTTTAAAGATCGGAAGAGCGGTTTCAG      |
| chr8 | 113323406 | 113323445 | CSMD3_9994  | + | GTGACCTATGCACCAGACGTGAAAAAATAAGCTGTTTAAATTAATGAATCAGAAATTTAAGATCGGAAGAGCGGTTTCAG    |
| chr8 | 113326292 | 113326331 | CSMD3_9995  | + | GTGACCTATGCACCAGACGTAAAATAAAAAATTTAGATAAAGCTAATTTATTTCTCATTAGATCGGAAGAGCGGTTTCAG    |
| chr8 | 113326857 | 113326896 | CSMD3_9996  | + | GTGACCTATGCACCAGACGTAAAATGTCATTAATAATGCCAGTCTTTTAGAGCCTCAGTAGATCGGAAGAGCGGTTTCAG    |
| chr8 | 113331190 | 113331229 | CSMD3_9997  | + | GTGACCTATGCACCAGACGTAAAAGAGGGGAGGTTTCATATAAGCAACAGGTGATGATAAAGATCGGAAGAGCGGTTTCAG   |
| chr8 | 113332221 | 113332260 | CSMD3_9998  | + | GTGACCTATGCACCAGACGTAAACAAAGTGTTTATTTCTTTTCTGTGCGACTACATGTATAGATCGGAAGAGCGGTTTCAG   |
| chr8 | 113347714 | 113347753 | CSMD3_9999  | + | GTGACCTATGCACCAGACGTAGGATTTGGAAAGGAGGAGAGATCAAGATTTGATTTGGAAGATCGGAAGAGCGGTTTCAG    |
| chr8 | 113349069 | 113349108 | CSMD3_10000 | + | GTGACCTATGCACCAGACGTATGTCACAAACAAATATGTTTAAATTTAAATAAACTAGATCGGAAGAGCGGTTTCAG       |
| chr8 | 113349971 | 113350010 | CSMD3_10001 | + | GTGACCTATGCACCAGACGTGAAAAAGAAAGACATTTTTTCTTTCCAAATTTTCAGAGGCCAGATCGGAAGAGCGGTTTCAG  |
| chr8 | 113353926 | 113353965 | CSMD3_10002 | + | GTGACCTATGCACCAGACGTAAACAAACAGAATGCTACTTTTATTTGCTTTACCGAATTAAGATCGGAAGAGCGGTTTCAG   |
| chr8 | 113358453 | 113358492 | CSMD3_10003 | + | GTGACCTATGCACCAGACGTACAGAAATCCAAAGTAAACAGAGTAGAGGAATAATTTACAGATCGGAAGAGCGGTTTCAG    |
| chr8 | 113363484 | 113363523 | CSMD3_10004 | + | GTGACCTATGCACCAGACGTAAAATGATGTGGTTTCAGTACACATACATAAAAAAGTTTAAAGATCGGAAGAGCGGTTTCAG  |
| chr8 | 113364774 | 113364813 | CSMD3_10005 | + | GTGACCTATGCACCAGACGTTTAAATGATACAATTTAAGTAACTTTCAAGTGATAAATCGATCGGAAGAGCGGTTTCAG     |
| chr8 | 113392696 | 113392735 | CSMD3_10006 | + | GTGACCTATGCACCAGACGTATAGTAAAGGCAAGCAATGACCACATAAAGTACTATAGATCGGAAGAGCGGTTTCAG       |
| chr8 | 113395903 | 113395942 | CSMD3_10007 | + | GTGACCTATGCACCAGACGTATAATTACAGGTAAGAATACACATTTCTAACCAGATACACAGATCGGAAGAGCGGTTTCAG   |
| chr8 | 113403028 | 113403067 | CSMD3_10008 | + | GTGACCTATGCACCAGACGTAGCAGTCCAAAGAGAGGGAGTTAATTTCTAATGCAAAAGGATAGATCGGAAGAGCGGTTTCAG |
| chr8 | 113420653 | 113420692 | CSMD3_10009 | + | GTGACCTATGCACCAGACGTAAACAAACACTAAGATATCATAATAATTTTTCATTTCAGTAAGATCGGAAGAGCGGTTTCAG  |
| chr8 | 113421272 | 113421311 | CSMD3_10010 | + | GTGACCTATGCACCAGACGTGGAACCCGAGAGCAAAACAAATCACCACCATCCAAAAAGATCGGAAGAGCGGTTTCAG      |
| chr8 | 113484947 | 113484986 | CSMD3_10011 | + | GTGACCTATGCACCAGACGTATGGCAAAAATATCATTTTTAGAAAAAGTTTAAAAAATAGATCGGAAGAGCGGTTTCAG     |
| chr8 | 113519069 | 113519108 | CSMD3_10012 | + | GTGACCTATGCACCAGACGTAAACAAACAAATAAAATCTCTTTAAACATTAATACAATTTAAGATCGGAAGAGCGGTTTCAG  |
| chr8 | 113529465 | 113529504 | CSMD3_10013 | + | GTGACCTATGCACCAGACGTACAGAGACAAAATTTAGTTTTGATACTACCAAAATCAAGATCGGAAGAGCGGTTTCAG      |
| chr8 | 113563113 | 113563152 | CSMD3_10014 | + | GTGACCTATGCACCAGACGTACCATATTTCTCTGATTTTTTAAACAAGGATTTCAACTTTAGATCGGAAGAGCGGTTTCAG   |
| chr8 | 113564960 | 113564999 | CSMD3_10015 | + | GTGACCTATGCACCAGACGTATAATAGAAATTTAAGCCACAATTTAATGCCAATTTTCAGATCGGAAGAGCGGTTTCAG     |
| chr8 | 113569194 | 113569233 | CSMD3_10016 | + | GTGACCTATGCACCAGACGTAATATAAATGATTAAGGCCAAAATTTAGGAGGAGGATTTAGATCGGAAGAGCGGTTTCAG    |
| chr8 | 113599475 | 113599514 | CSMD3_10017 | + | GTGACCTATGCACCAGACGTAAACAGAAATTTAGAAAGTACAGTTAATAGATAGCAGTATCAAGATCGGAAGAGCGGTTTCAG |
| chr8 | 113649245 | 113649284 | CSMD3_10018 | + | GTGACCTATGCACCAGACGTGAGAGAAAAATTTCCCGCGGGGAGGAAAGGACAAAGAAAGATCGGAAGAGCGGTTTCAG     |
| chr8 | 113651151 | 113651190 | CSMD3_10019 | + | GTGACCTATGCACCAGACGTAAATAGAAACACTGAATTTACAGGTAGATCAGTAAACACAGATCGGAAGAGCGGTTTCAG    |
| chr8 | 113657465 | 113657504 | CSMD3_10020 | + | GTGACCTATGCACCAGACGTAAAGAAACAGATCCATGTGATCAGCAGTGAGAGAGACAGAGATCGGAAGAGCGGTTTCAG    |
| chr8 | 113662589 | 113662628 | CSMD3_10021 | + | GTGACCTATGCACCAGACGTAAAGGGAAGAAATAAAGATAGTAAAGTGGTGGGATTTGGAGAGATCGGAAGAGCGGTTTCAG  |
| chr8 | 113668581 | 113668620 | CSMD3_10022 | + | GTGACCTATGCACCAGACGTAAAGACACATGTGAAAATATTTAGAATTAACACTATATAAGATCGGAAGAGCGGTTTCAG    |
| chr8 | 113678655 | 113678694 | CSMD3_10023 | + | GTGACCTATGCACCAGACGTAAATCAGACAAGTAAGAATAAAACATTTCAAGATAAATCGCAGATCGGAAGAGCGGTTTCAG  |
| chr8 | 113694876 | 113694915 | CSMD3_10024 | + | GTGACCTATGCACCAGACGTATGCAAAAGAAAAATACACAAACAAACAAATTTAGCCAGAGATCGGAAGAGCGGTTTCAG    |
| chr8 | 113697972 | 113698011 | CSMD3_10025 | + | GTGACCTATGCACCAGACGTAGGAAGATTTAGAAATCAATAAATATTTCAAAAAATAATATAGATCGGAAGAGCGGTTTCAG  |
| chr8 | 113702290 | 113702329 | CSMD3_10026 | + | GTGACCTATGCACCAGACGTAGAAGATAAAAGTCACCTTCCAAAGGGTTGACGGCATATGAAGATCGGAAGAGCGGTTTCAG  |
| chr8 | 113812514 | 113812553 | CSMD3_10027 | + | GTGACCTATGCACCAGACGTATGGCAAAAAGAGGAGAGATGGGTTATTAACACTCCTCAGATCGGAAGAGCGGTTTCAG     |
| chr8 | 113842029 | 113842068 | CSMD3_10028 | + | GTGACCTATGCACCAGACGTACAGAAACATGCAACTATGCACTGCGTTGTGCAATAAAGATCGGAAGAGCGGTTTCAG      |
| chr8 | 113871506 | 113871545 | CSMD3_10029 | + | GTGACCTATGCACCAGACGTAAATGCAATTTTAAAAAGATGAACATATGTCACATGTAATAAAGATCGGAAGAGCGGTTTCAG |
| chr8 | 113933991 | 113934030 | CSMD3_10030 | + | GTGACCTATGCACCAGACGTATAAAAGAGAAAAAATATGATAAGAAAGATGCAACATAATAGATCGGAAGAGCGGTTTCAG   |
| chr8 | 113960117 | 113960156 | CSMD3_10031 | + | GTGACCTATGCACCAGACGTAGGGAAAAAAGAAAAAGAAACAAATATATGTGATTAGAAGATCGGAAGAGCGGTTTCAG     |
| chr8 | 113967001 | 113967040 | CSMD3_10032 | + | GTGACCTATGCACCAGACGTAAACAAACAAACAAATGATCAGGAATAACAATTTTAAAAAGATCGGAAGAGCGGTTTCAG    |
| chr8 | 113988388 | 113988427 | CSMD3_10033 | + | GTGACCTATGCACCAGACGTAGTACGACTAGATGCTAACTTTTCTTTAAATTTGTAGATCGGAAGAGCGGTTTCAG        |
| chr8 | 114031419 | 114031458 | CSMD3_10034 | + | GTGACCTATGCACCAGACGTAAAGACAACAACAAAAATTTAAAAAGCTTTTTCAGCAGTAGATCGGAAGAGCGGTTTCAG    |

|       |           |           |               |   |                                                                                     |
|-------|-----------|-----------|---------------|---|-------------------------------------------------------------------------------------|
| chr8  | 114111203 | 114111242 | CSMD3_10035   | + | GTGACCTATGCACCAGACGTTGACAAAATATTTCAGTTGTAAGTTATTGAGATAAATGCAAAGATCGGAAGAGCGGTTTCAG  |
| chr8  | 114186156 | 114186195 | CSMD3_10036   | + | GTGACCTATGCACCAGACGTGAGGAAAAGGAGAGTTTACAGTTATTTCAATAAGCAGTTAGATCGGAAGAGCGGTTTCAG    |
| chr8  | 114290944 | 114290983 | CSMD3_10037   | + | GTGACCTATGCACCAGACGTATGGAATTAATTGTTAGAGACATAATCATTTTATCTAAGAAGATCGGAAGAGCGGTTTCAG   |
| chr8  | 114327033 | 114327072 | CSMD3_10038   | + | GTGACCTATGCACCAGACGTAGACAATAAACAGACATTAAATATTATAAATCAAGAACAAGATCGGAAGAGCGGTTTCAG    |
| chr8  | 114389035 | 114389074 | CSMD3_10039   | + | GTGACCTATGCACCAGACGTTGTGCTGAAGAGGTTGTTTATGAGTCGCAACAACCGGCCAAGATCGGAAGAGCGGTTTCAG   |
| chr8  | 114449094 | 114449133 | CSMD3_10040   | + | GTGACCTATGCACCAGACGTAGCTCCTAATTCCTGCTCCTCAGCCCGGCAGTGGAGTTAGATCGGAAGAGCGGTTTCAG     |
| chr19 | 1969969   | 1970008   | CSNK1G2_10041 | + | GTGACCTATGCACCAGACGTGCTCGTGGTGGTAGGTTGGGTCGGGAGGCTGCTGCAGGGCCAGATCGGAAGAGCGGTTTCAG  |
| chr19 | 1978355   | 1978394   | CSNK1G2_10042 | + | GTGACCTATGCACCAGACGTCCCTCCACCCCACCCCGCTGACGTGCCCCAGGGATTTAGATCGGAAGAGCGGTTTCAG      |
| chr19 | 1979258   | 1979297   | CSNK1G2_10043 | + | GTGACCTATGCACCAGACGTAGGCCGGGCAGGCCGGGCGGGAGCAGGGCGGGAGCAAGGAGATCGGAAGAGCGGTTTCAG    |
| chr19 | 1979653   | 1979692   | CSNK1G2_10044 | + | GTGACCTATGCACCAGACGTGGGTGCCGGTATGTGGGAGCGGGGACCGGAAACTGCCAGATCGGAAGAGCGGTTTCAG      |
| chr19 | 1979845   | 1979884   | CSNK1G2_10045 | + | GTGACCTATGCACCAGACGTGGCGGGACCCGCCAGGGAGGGGCATGGCGGCCAGAGATCGGAAGAGCGGTTTCAG         |
| chr19 | 1980027   | 1980066   | CSNK1G2_10046 | + | GTGACCTATGCACCAGACGTGGGCGGTGCCTTCGGGGAGTGGGGGTGCCTGGTCCCAGATCGGAAGAGCGGTTTCAG       |
| chr19 | 1980213   | 1980252   | CSNK1G2_10047 | + | GTGACCTATGCACCAGACGTGTGCAGCCCCCTGAATCTTCCGTCCGTGCAGCCCCCTGGGCGAGATCGGAAGAGCGGTTTCAG |
| chr5  | 138117729 | 138117768 | CTNNA1_10048  | + | GTGACCTATGCACCAGACGTGAAAACACAATAACATTGTAACATGGTTCATAGCACAGGAGATCGGAAGAGCGGTTTCAG    |
| chr5  | 138119072 | 138119111 | CTNNA1_10049  | + | GTGACCTATGCACCAGACGTACTGCTTTTTAGGTAAGAGAGGCAGGCCCTTTCTAGAAAAGATCGGAAGAGCGGTTTCAG    |
| chr5  | 138145904 | 138145943 | CTNNA1_10050  | + | GTGACCTATGCACCAGACGTAGGCCTATGTCTGTAATTTGTTCTATCACAGGAAGATTGCAGATCGGAAGAGCGGTTTCAG   |
| chr5  | 138148002 | 138148041 | CTNNA1_10051  | + | GTGACCTATGCACCAGACGTGATTTGGGGATATATTAAGTTGTTCAATTTTACTATCTAGAGATCGGAAGAGCGGTTTCAG   |
| chr5  | 138160499 | 138160538 | CTNNA1_10052  | + | GTGACCTATGCACCAGACGTCTTGGGTGGAATTTCCAGCTCTTGACCATCCCCAAAAGATCGGAAGAGCGGTTTCAG       |
| chr5  | 138163418 | 138163457 | CTNNA1_10053  | + | GTGACCTATGCACCAGACGTACGCTTTTCTTTGAAAGTAAGATTTTATGGATGAGGAGTTAGATCGGAAGAGCGGTTTCAG   |
| chr5  | 138221992 | 138222031 | CTNNA1_10054  | + | GTGACCTATGCACCAGACGTTGAAAGTGCTGATTGTTTTCTAAGTTCTCAATTTTGTAGAGATCGGAAGAGCGGTTTCAG    |
| chr5  | 138223342 | 138223381 | CTNNA1_10055  | + | GTGACCTATGCACCAGACGTAGCAGTTTCATTGACTTGTAGGCACTTGGTGAAGTGTGAGATCGGAAGAGCGGTTTCAG     |
| chr5  | 138240141 | 138240180 | CTNNA1_10056  | + | GTGACCTATGCACCAGACGTACTGACACTGGTGACAGCATAACCAAATTAATTTTATTAGATCGGAAGAGCGGTTTCAG     |
| chr5  | 138253598 | 138253637 | CTNNA1_10057  | + | GTGACCTATGCACCAGACGTGGTTCCTCCAGGAAGTATGTGAAGATGTCATAATTACTTAGATCGGAAGAGCGGTTTCAG    |
| chr5  | 138260410 | 138260449 | CTNNA1_10058  | + | GTGACCTATGCACCAGACGTCTCCCTTTCCAGTTCTGCACACACCCGACCTAGTGAAGATCGGAAGAGCGGTTTCAG       |
| chr5  | 138261107 | 138261146 | CTNNA1_10059  | + | GTGACCTATGCACCAGACGTGCATTTCAGACGCTTAAACAGCTTCTTTCTATCATTTCAGATCGGAAGAGCGGTTTCAG     |
| chr5  | 138265056 | 138265095 | CTNNA1_10060  | + | GTGACCTATGCACCAGACGTGCTCCGTGGGCGAGTTCAGCTTGTGCTGCCACTTTCCCTAGATCGGAAGAGCGGTTTCAG    |
| chr5  | 138266354 | 138266393 | CTNNA1_10061  | + | GTGACCTATGCACCAGACGTCCCCGGCCCCACCCAGGCTGCACAGGGGCTACTTTCTCCAGATCGGAAGAGCGGTTTCAG    |
| chr5  | 138266635 | 138266674 | CTNNA1_10062  | + | GTGACCTATGCACCAGACGTGACTTGCCAGGTGGGTCTCCAAGCTCCTCCTGGGGCTCAGAGATCGGAAGAGCGGTTTCAG   |
| chr5  | 138268412 | 138268451 | CTNNA1_10063  | + | GTGACCTATGCACCAGACGTGTGAACAAAAGAGGGCCAGTGGGAACGTGCTGACCCTTAGATCGGAAGAGCGGTTTCAG     |
| chr5  | 138269789 | 138269828 | CTNNA1_10064  | + | GTGACCTATGCACCAGACGTGCCGGCCGCCCCACCCCTCGGGGCTCCTGAATACAGTCAGATCGGAAGAGCGGTTTCAG     |
| chr2  | 38298464  | 38298503  | CYP1B1_10065  | + | GTGACCTATGCACCAGACGTTTTAATGTGGAGAGAGAAAAGCAAGTGAAGCAAAATTTTAAAGATCGGAAGAGCGGTTTCAG  |
| chr2  | 38302542  | 38302581  | CYP1B1_10066  | + | GTGACCTATGCACCAGACGTGAGAGGAGAAGGCGTGACACTCAGGGGTGCAGAGACAGGAAGATCGGAAGAGCGGTTTCAG   |
| chr2  | 38298169  | 38298208  | CYP1B1_10067  | + | GTGACCTATGCACCAGACGTGCTGGATCAAAAGTTCTCCGGGTTAGGCCACTTCACTGGGTAGATCGGAAGAGCGGTTTCAG  |
| chr2  | 38301846  | 38301885  | CYP1B1_10068  | + | GTGACCTATGCACCAGACGTTCGTTGCTGGCTGAGCACTCAGGCACTCGGGGTCTGCTGATCGGAAGAGCGGTTTCAG      |
| chr2  | 38302193  | 38302232  | CYP1B1_10069  | + | GTGACCTATGCACCAGACGTGGCCGAGCCCTGTGCAGCCAGGGCTGTGGATGCGCAGATCGGAAGAGCGGTTTCAG        |
| chr11 | 47236825  | 47236864  | DDB2_10070    | + | GTGACCTATGCACCAGACGTTGCCTGCTGCTTGAATATTTCCGCCTTTTAGGGTGTGCGAGATCGGAAGAGCGGTTTCAG    |
| chr11 | 47238034  | 47238073  | DDB2_10071    | + | GTGACCTATGCACCAGACGTTTTGCCTCAAGTCTCAAGGGTTACACGTGCATTTTTAAGATCGGAAGAGCGGTTTCAG      |
| chr11 | 47254521  | 47254560  | DDB2_10072    | + | GTGACCTATGCACCAGACGTTAACTAGCAGGGGAAAGGGCTTCTAAGCTTAGGTGTAGTTAGATCGGAAGAGCGGTTTCAG   |
| chr11 | 47256234  | 47256273  | DDB2_10073    | + | GTGACCTATGCACCAGACGTGAGGTCCTGCCTTTCCCTCCCTCACCCCACTCGGTTTCAGATCGGAAGAGCGGTTTCAG     |
| chr11 | 47256496  | 47256535  | DDB2_10074    | + | GTGACCTATGCACCAGACGTCCAGACTCATCTCTCAGCAGCCCTGCTGCTGACCAAGATCGGAAGAGCGGTTTCAG        |
| chr11 | 47256974  | 47257013  | DDB2_10075    | + | GTGACCTATGCACCAGACGTGGGAAGGAGCTCGCAAGAGGCTGTGATCATGAGGCAGATCGGAAGAGCGGTTTCAG        |
| chr11 | 47259563  | 47259602  | DDB2_10076    | + | GTGACCTATGCACCAGACGTGGTCTCAATAATGATGGGAGGAAGCAGGGATTCAACCTAGATCGGAAGAGCGGTTTCAG     |
| chr11 | 47259745  | 47259784  | DDB2_10077    | + | GTGACCTATGCACCAGACGTGGAGAATGTCTGACTTGCCAAAGTCCGATCCTACTTCCAGATCGGAAGAGCGGTTTCAG     |
| chr11 | 47260411  | 47260450  | DDB2_10078    | + | GTGACCTATGCACCAGACGTAGAAGGTGTGGGCCAGACAAGGCCCTTGAGCCACACATGAGATCGGAAGAGCGGTTTCAG    |
| chr7  | 137076093 | 137076132 | DGKI_10079    | + | GTGACCTATGCACCAGACGTATGAGAAAAAAAGAGAGAGATAGACACAAAGATCGGAAGAGCGGTTTCAG              |
| chr7  | 137080454 | 137080493 | DGKI_10080    | + | GTGACCTATGCACCAGACGTGATGAAATGGGAAACCACCATAGAGGGTTGGAGCAGCAGATCGGAAGAGCGGTTTCAG      |
| chr7  | 137082170 | 137082209 | DGKI_10081    | + | GTGACCTATGCACCAGACGTAGAAAGCAAGATGACCGTCAAAAATAAGCTCAAAAATAAAGATCGGAAGAGCGGTTTCAG    |
| chr7  | 137092752 | 137092791 | DGKI_10082    | + | GTGACCTATGCACCAGACGTAGACATAAAAAAGAAGCTCAGGCAGAAATTCGGAACAAGGAGATCGGAAGAGCGGTTTCAG   |
| chr7  | 137096964 | 137097003 | DGKI_10083    | + | GTGACCTATGCACCAGACGTCAAAAGAGAGATGCCATTAGTAGAAGACCCCTTATTAAAGATCGGAAGAGCGGTTTCAG     |
| chr7  | 137128859 | 137128898 | DGKI_10084    | + | GTGACCTATGCACCAGACGTATAATAAGCATGATCAATTTTTATATGATAATTATAATGAGATCGGAAGAGCGGTTTCAG    |
| chr7  | 137148368 | 137148407 | DGKI_10085    | + | GTGACCTATGCACCAGACGTGAAGGGCACCGATGATTAACATTCAAAGTCAGCCAGTAGATCGGAAGAGCGGTTTCAG      |
| chr7  | 137150792 | 137150831 | DGKI_10086    | + | GTGACCTATGCACCAGACGTACAGAAGCTGATGCATGGAAGAAATAACAAAACAAGTATTAGATCGGAAGAGCGGTTTCAG   |
| chr7  | 137151669 | 137151708 | DGKI_10087    | + | GTGACCTATGCACCAGACGTAAAGCGATCAGCAGAAGTTGCTAGGGGAAAAAAATGCAGAGATCGGAAGAGCGGTTTCAG    |
| chr7  | 137154376 | 137154415 | DGKI_10088    | + | GTGACCTATGCACCAGACGTACACACACACTCTAGTGGCTGCATTTCAATAACCTGATGGAGATCGGAAGAGCGGTTTCAG   |
| chr7  | 137170175 | 137170214 | DGKI_10089    | + | GTGACCTATGCACCAGACGTAATGAAAAAAAATCCATACCTTAAATATAGTTTGAACAAGATCGGAAGAGCGGTTTCAG     |
| chr7  | 137172446 | 137172485 | DGKI_10090    | + | GTGACCTATGCACCAGACGTAGGAAGAAGAAAATCTAAAATAACATTTGATTTTTCTAGATCGGAAGAGCGGTTTCAG      |
| chr7  | 137206723 | 137206762 | DGKI_10091    | + | GTGACCTATGCACCAGACGTAGAACCAGTGTGCAGATAAAATGAGAGAGCGGAATTGAGATCGGAAGAGCGGTTTCAG      |
| chr7  | 137237325 | 137237364 | DGKI_10092    | + | GTGACCTATGCACCAGACGTAAAGAGTCAAGGGGACAAAGGAGTTAGTTATTATTTAAGAAGATCGGAAGAGCGGTTTCAG   |

|       |           |           |              |   |                                                                                    |
|-------|-----------|-----------|--------------|---|------------------------------------------------------------------------------------|
| chr7  | 137256043 | 137256082 | DGKI_10093   | + | GTGACCTATGCACCAGACGTAGATTAAGACAGAAGTAAATATGTCCATCCTTCTCATGAGATCGGAAGAGCGGTTTCAG    |
| chr7  | 137257595 | 137257634 | DGKI_10094   | + | GTGACCTATGCACCAGACGTGAAAAACAGAAAAGGGGTTTTGAAGTAGTCACAAGTCTAAAAGATCGGAAGAGCGGTTTCAG |
| chr7  | 137262041 | 137262080 | DGKI_10095   | + | GTGACCTATGCACCAGACGTGGGAAATAAAGAAGAAATTCGTAATTACATGGTGATAAGATCGGAAGAGCGGTTTCAG     |
| chr7  | 137263082 | 137263121 | DGKI_10096   | + | GTGACCTATGCACCAGACGTGAAAAAGTAGTTTTGTATGGAGACCTCACTAAAGGTAGCAGATCGGAAGAGCGGTTTCAG   |
| chr7  | 137266685 | 137266724 | DGKI_10097   | + | GTGACCTATGCACCAGACGTAAACAAAGACAGAGGCAAAATTTTGTGTGCCAGGCAGAAAAGATCGGAAGAGCGGTTTCAG  |
| chr7  | 137270103 | 137270142 | DGKI_10098   | + | GTGACCTATGCACCAGACGTAGAGAACATCCATTGCTGTCAGAGTGGAGAACAGTGAAGATCGGAAGAGCGGTTTCAG     |
| chr7  | 137271967 | 137272006 | DGKI_10099   | + | GTGACCTATGCACCAGACGTTCGGGGGCCAGAAGAGATAAAGAATAAATAAGTTAAGATCGGAAGAGCGGTTTCAG       |
| chr7  | 137282664 | 137282703 | DGKI_10100   | + | GTGACCTATGCACCAGACGTAAAGAAGAAAAAGTAAACAAAAGAACATTTCACTGGCTAAGATCGGAAGAGCGGTTTCAG   |
| chr7  | 137284662 | 137284701 | DGKI_10101   | + | GTGACCTATGCACCAGACGTAAATACACAAAAAGGCAATAATAGGAAGAAATTTCCCAAAGATCGGAAGAGCGGTTTCAG   |
| chr7  | 137293821 | 137293860 | DGKI_10102   | + | GTGACCTATGCACCAGACGTCAATCAGCACTGTTAGGATACACATCCATGGCTTGAAAGGAGATCGGAAGAGCGGTTTCAG  |
| chr7  | 137294366 | 137294405 | DGKI_10103   | + | GTGACCTATGCACCAGACGTAGAGAGAAATGCCTGAGCTCAGAGGCCAGCCAGCCCAGGAGATCGGAAGAGCGGTTTCAG   |
| chr7  | 137304697 | 137304736 | DGKI_10104   | + | GTGACCTATGCACCAGACGTAATAAGCCAGTAAACAATTTCTGGTCAAAGAGTAATGCTGAGATCGGAAGAGCGGTTTCAG  |
| chr7  | 137308311 | 137308350 | DGKI_10105   | + | GTGACCTATGCACCAGACGTAGAACAAGAGACAGATAATTTAAACCACCTCAGTTACAGAGATCGGAAGAGCGGTTTCAG   |
| chr7  | 137339545 | 137339584 | DGKI_10106   | + | GTGACCTATGCACCAGACGTAAAAAGAAAGTATATTATATTAGAGATAAGCATCAGACTAAGATCGGAAGAGCGGTTTCAG  |
| chr7  | 137341297 | 137341336 | DGKI_10107   | + | GTGACCTATGCACCAGACGTCAATTCAAAAGACAAAAAGAAATGTTAACAGTCTGTTCTAGATCGGAAGAGCGGTTTCAG   |
| chr7  | 137363409 | 137363448 | DGKI_10108   | + | GTGACCTATGCACCAGACGTAAAGACCCACTGACATCAATTTTTTTTTTCCAGGGATAAGAGATCGGAAGAGCGGTTTCAG  |
| chr6  | 10984150  | 10984189  | ELOVL2_10109 | + | GTGACCTATGCACCAGACGTTGTATATTTGAAGAGAAAAATAAAAAGGTTATTTAATAAAGATCGGAAGAGCGGTTTCAG   |
| chr6  | 10990081  | 10990120  | ELOVL2_10110 | + | GTGACCTATGCACCAGACGTACAGAGGCCATCTGTGAGCGGGCAGGCTGTGCCACAAGATCGGAAGAGCGGTTTCAG      |
| chr6  | 10990686  | 10990725  | ELOVL2_10111 | + | GTGACCTATGCACCAGACGTACAGTATAAAAATCACTATTCTTCCAGGAAGGACTGTTCAAGATCGGAAGAGCGGTTTCAG  |
| chr6  | 10995422  | 10995461  | ELOVL2_10112 | + | GTGACCTATGCACCAGACGTTTTGTAAGGGGAGAAAAGGGTGAGAAATGGCAGTGTTCCTAGATCGGAAGAGCGGTTTCAG  |
| chr6  | 11000408  | 11000447  | ELOVL2_10113 | + | GTGACCTATGCACCAGACGTACCAGAAAAGAAAAGAAAACAACATCAGCACAGAATTTAGATCGGAAGAGCGGTTTCAG    |
| chr6  | 11005803  | 11005842  | ELOVL2_10114 | + | GTGACCTATGCACCAGACGTACACATACAGTGAAGATCCTGAGGAATGATGCTCCTGTTTAGATCGGAAGAGCGGTTTCAG  |
| chr6  | 11011053  | 11011092  | ELOVL2_10115 | + | GTGACCTATGCACCAGACGTAAGAAAAAATGATTTAAGTGTTTTTTTCTCTTTTTTTGAGATCGGAAGAGCGGTTTCAG    |
| chr6  | 1104474   | 11044513  | ELOVL2_10116 | + | GTGACCTATGCACCAGACGTGGCTGTGGCGCGGACCTCCCGGGCGGCGATGCGCTGTAGATCGGAAGAGCGGTTTCAG     |
| chr12 | 132446510 | 132446549 | EP400_10117  | + | GTGACCTATGCACCAGACGTGGAGTTAATTTGTTTAGTACAAATCTTCTAGATGATCAGAAGATCGGAAGAGCGGTTTCAG  |
| chr12 | 132464349 | 132464388 | EP400_10118  | + | GTGACCTATGCACCAGACGTACGGCTAGCGTGGCCCTCGGAATGCCCCCTCTCTTTGGGAGATCGGAAGAGCGGTTTCAG   |
| chr12 | 132466152 | 132466191 | EP400_10119  | + | GTGACCTATGCACCAGACGTGCAGCAGAGCCAGCTCCCGCTCAGGAGCAGGCAGCACACAGATCGGAAGAGCGGTTTCAG   |
| chr12 | 132467034 | 132467073 | EP400_10120  | + | GTGACCTATGCACCAGACGTAGATAGAGGAAAAAAGAAAATGGTTGCAGGATTTGCTGAGATCGGAAGAGCGGTTTCAG    |
| chr12 | 132471363 | 132471402 | EP400_10121  | + | GTGACCTATGCACCAGACGTTTAAGAAAGTTGAAATGTACTCCAGTTGGTGAAGCACAAGATCGGAAGAGCGGTTTCAG    |
| chr12 | 132472446 | 132472485 | EP400_10122  | + | GTGACCTATGCACCAGACGTTCGGTGAGCTGCTGTGCTGTGTGCGTGTGCGTGGGGGCTAGATCGGAAGAGCGGTTTCAG   |
| chr12 | 132474660 | 132474699 | EP400_10123  | + | GTGACCTATGCACCAGACGTCCGTTGTCATGGGGTCTGAAGAATCAGTCTGTCGGAGCTGAGATCGGAAGAGCGGTTTCAG  |
| chr12 | 132475270 | 132475309 | EP400_10124  | + | GTGACCTATGCACCAGACGTTTTAAAAAAGGCTCACACGCTTGGTGATTTTGTTCGAGATCGGAAGAGCGGTTTCAG      |
| chr12 | 132476012 | 132476051 | EP400_10125  | + | GTGACCTATGCACCAGACGTGGTTGTTACTGTCTGTGTGAGAGAGGAGTAGAAGCAGCTAGATCGGAAGAGCGGTTTCAG   |
| chr12 | 132476786 | 132476825 | EP400_10126  | + | GTGACCTATGCACCAGACGTCTCAGCAGCTATTTGTCTCAGGCTGCTGATGAGAGATCGGAAGAGCGGTTTCAG         |
| chr12 | 132479512 | 132479551 | EP400_10127  | + | GTGACCTATGCACCAGACGTGCTACCTTATAAACACTCAGTAAAGTAAAAAGAAACATTTAGATCGGAAGAGCGGTTTCAG  |
| chr12 | 132489740 | 132489779 | EP400_10128  | + | GTGACCTATGCACCAGACGTAGCCTTTGGAAGAATTCAGGGTAAAAAGCAGAAGCCGGAGAGATCGGAAGAGCGGTTTCAG  |
| chr12 | 132490858 | 132490897 | EP400_10129  | + | GTGACCTATGCACCAGACGTAAAGCTTTCAAGTGTGGGATGGCCCTTTGAGAGACAGAGCAAGATCGGAAGAGCGGTTTCAG |
| chr12 | 132491433 | 132491472 | EP400_10130  | + | GTGACCTATGCACCAGACGTGCTAGTTTTTTAAACAATACCTATTTGCTAGGACTTACCTAGATCGGAAGAGCGGTTTCAG  |
| chr12 | 132496190 | 132496229 | EP400_10131  | + | GTGACCTATGCACCAGACGTTTTAAACATAAAAATAAGCTAAACAGAAAGCCATGTTAATAGATCGGAAGAGCGGTTTCAG  |
| chr12 | 132497734 | 132497773 | EP400_10132  | + | GTGACCTATGCACCAGACGTTACGCGCTTGTCAATGAGTGTCTTTGTCTGTTGATGTAGAAGATCGGAAGAGCGGTTTCAG  |
| chr12 | 132498220 | 132498259 | EP400_10133  | + | GTGACCTATGCACCAGACGTTTTCTGCCATTTCAAGTAAATTAACATGCGTATGCTGATCGGAAGAGCGGTTTCAG       |
| chr12 | 132498469 | 132498508 | EP400_10134  | + | GTGACCTATGCACCAGACGTGCTCTGGGCATGTGCCCCCTTTGCTGTCCCTGCCTGTGAGAGATCGGAAGAGCGGTTTCAG  |
| chr12 | 132502277 | 132502316 | EP400_10135  | + | GTGACCTATGCACCAGACGTGATCCAGAAAGCGGAATTAAGTGTGGATATCTTTCTAGGAGATCGGAAGAGCGGTTTCAG   |
| chr12 | 132502932 | 132502971 | EP400_10136  | + | GTGACCTATGCACCAGACGTCCCAGAGGACGCGGGAGGGTGGCTCCCAGGGCCCCACAGATCGGAAGAGCGGTTTCAG     |
| chr12 | 132504774 | 132504813 | EP400_10137  | + | GTGACCTATGCACCAGACGTGATGTTGCTGTCTCCGCTTATGGAGTGTGTTTGTGGGAGATCGGAAGAGCGGTTTCAG     |
| chr12 | 132505877 | 132505916 | EP400_10138  | + | GTGACCTATGCACCAGACGTTCACTTCCAGTCTTCCAGTCTTCCATCTCTACCCAGAGGAAGATCGGAAGAGCGGTTTCAG  |
| chr12 | 132508497 | 132508536 | EP400_10139  | + | GTGACCTATGCACCAGACGTGGATGAGAGAGCACTGATGCCAAAAATGACAAAAGCGCCTAGATCGGAAGAGCGGTTTCAG  |
| chr12 | 132510360 | 132510399 | EP400_10140  | + | GTGACCTATGCACCAGACGTCTGAGCAGGAGGGAGACTTGGCTTGGATGCTCTTTTCTAGATCGGAAGAGCGGTTTCAG    |
| chr12 | 132512087 | 132512126 | EP400_10141  | + | GTGACCTATGCACCAGACGTGAGCTTGAAGCCCGGTGCACGTGGACAGGTAGCTTTCCAAGATCGGAAGAGCGGTTTCAG   |
| chr12 | 132512844 | 132512883 | EP400_10142  | + | GTGACCTATGCACCAGACGTCCCTCGTGACCTTTTCGGTGTCTCTGGCTGCATTGCACCCAGATCGGAAGAGCGGTTTCAG  |
| chr12 | 132514459 | 132514498 | EP400_10143  | + | GTGACCTATGCACCAGACGTGTTGGGGCGTGGCCGTCGGGAGCTCACCCGCGCTGGAGATCGGAAGAGCGGTTTCAG      |
| chr12 | 132514714 | 132514753 | EP400_10144  | + | GTGACCTATGCACCAGACGTCATTTTACATGTTCTCTGATGGGTGAGTCACTGCTGTTAGATCGGAAGAGCGGTTTCAG    |
| chr12 | 132516705 | 132516744 | EP400_10145  | + | GTGACCTATGCACCAGACGTGCGGGGGATAGGATCAGGAGATGCAAAGACATCCACATATAGATCGGAAGAGCGGTTTCAG  |
| chr12 | 132522349 | 132522388 | EP400_10146  | + | GTGACCTATGCACCAGACGTTTCAATGAGAGGCCTGAGGTGAGACCCGCCATGCGGCGGAGATCGGAAGAGCGGTTTCAG   |
| chr12 | 132522652 | 132522691 | EP400_10147  | + | GTGACCTATGCACCAGACGTATTGAATCTGGCTGAAGAGTTGCACGGTGGGAGCCGCGGAGATCGGAAGAGCGGTTTCAG   |
| chr12 | 132528018 | 132528057 | EP400_10148  | + | GTGACCTATGCACCAGACGTGTTTTCTTTACAACATACATATTTAAAAATTTGACGCTTAGATCGGAAGAGCGGTTTCAG   |
| chr12 | 132528284 | 132528323 | EP400_10149  | + | GTGACCTATGCACCAGACGTCAAGTTTTGGTCTAGTAAAAAATTTGCAATATTTTTCAGAAGATCGGAAGAGCGGTTTCAG  |
| chr12 | 132528867 | 132528906 | EP400_10150  | + | GTGACCTATGCACCAGACGTGCCGTTCCCTCTGCCCTTGTCCCTTCTGAGGGGCACAGATCGGAAGAGCGGTTTCAG      |

|       |           |           |             |   |                                                                                      |
|-------|-----------|-----------|-------------|---|--------------------------------------------------------------------------------------|
| chr12 | 132529271 | 132529310 | EP400_10151 | + | GTGACCTATGCACCAGACGTCCCTCTCCCTTTGTGTCTGTGTGGGCAGCTTCTGTGAGTAGATCGGAAGAGCGGTTTCAG     |
| chr12 | 132529509 | 132529548 | EP400_10152 | + | GTGACCTATGCACCAGACGTCGAGGGCGTACATGACCTGGGGGGGCCCTTGCCTGCAGAAAGATCGGAAGAGCGGTTTCAG    |
| chr12 | 132530116 | 132530155 | EP400_10153 | + | GTGACCTATGCACCAGACGTGTGGTCTTTGTGCCAGCGGTGATGTGCGGTCAATTTTTCTAAGATCGGAAGAGCGGTTTCAG   |
| chr12 | 132530456 | 132530495 | EP400_10154 | + | GTGACCTATGCACCAGACGTTCTCGTTTGTCCCTCGAGGAGAGCACAGGCAGGTGTGGTGAGATCGGAAGAGCGGTTTCAG    |
| chr12 | 132535015 | 132535054 | EP400_10155 | + | GTGACCTATGCACCAGACGTTGAGTGCTCAATTTATGTTCAATGACTGAGTAGATTGCAGATCGGAAGAGCGGTTTCAG      |
| chr12 | 132535211 | 132535250 | EP400_10156 | + | GTGACCTATGCACCAGACGTATTCGTGACACATTTGTACTGTTTGAAGGATTTCAATTCAGATCGGAAGAGCGGTTTCAG     |
| chr12 | 132537780 | 132537819 | EP400_10157 | + | GTGACCTATGCACCAGACGTTGGGCCCTTCTGTTGAGTGGGAAAATGTGGTGACTGTGAAGATCGGAAGAGCGGTTTCAG     |
| chr12 | 132538153 | 132538192 | EP400_10158 | + | GTGACCTATGCACCAGACGTCGCCTCTCCCGGGCTTCCCTCTACGGGAAGTCACCCACAAGATCGGAAGAGCGGTTTCAG     |
| chr12 | 132539575 | 132539614 | EP400_10159 | + | GTGACCTATGCACCAGACGTTACAGAGATGCTGAAATGTGGACCCCATTTCTCTGGCGCAGATCGGAAGAGCGGTTTCAG     |
| chr12 | 132539764 | 132539803 | EP400_10160 | + | GTGACCTATGCACCAGACGTCCTCACCTGGGTTGTGCACCTTGACTGCATTCTGCCGAAAAGATCGGAAGAGCGGTTTCAG    |
| chr12 | 132546879 | 132546918 | EP400_10161 | + | GTGACCTATGCACCAGACGTGTGGGAGCTTCTCTGCCACACGCTGTGCTGTGGCGGTGAGATCGGAAGAGCGGTTTCAG      |
| chr12 | 132547257 | 132547296 | EP400_10162 | + | GTGACCTATGCACCAGACGTCACAGAGCTTCAACGTCGCTGTCGCTTGTGGTTCAGTTCAGAGATCGGAAGAGCGGTTTCAG   |
| chr12 | 132549442 | 132549481 | EP400_10163 | + | GTGACCTATGCACCAGACGTTTTCTGTTTTGTTTTCCAAAAGCAGCATTTTTTATGTTTTAGATCGGAAGAGCGGTTTCAG    |
| chr12 | 132551525 | 132551564 | EP400_10164 | + | GTGACCTATGCACCAGACGTCAGCACACCCCTCCCGTCTGGGCTTGTAGCCTGGTTTACAAGATCGGAAGAGCGGTTTCAG    |
| chr12 | 132552042 | 132552081 | EP400_10165 | + | GTGACCTATGCACCAGACGTTAGGGGATTCTCACTTCTGGTCTATGCCAAGCCAAAGCTAGATCGGAAGAGCGGTTTCAG     |
| chr12 | 132554197 | 132554236 | EP400_10166 | + | GTGACCTATGCACCAGACGTTAACAGGGTGAGGGCCCCAGGTGCAGGAGTGGTGCCTGCCGCGAGATCGGAAGAGCGGTTTCAG |
| chr12 | 132561149 | 132561188 | EP400_10167 | + | GTGACCTATGCACCAGACGTTAGCAAAGTGGAAACCTCACATTTCCAGGTCAGAAATAGATCGGAAGAGCGGTTTCAG       |
| chr12 | 132562229 | 132562268 | EP400_10168 | + | GTGACCTATGCACCAGACGTAGGCTTGCCTCATCTAAAGCATAAAGCTACCTTCCCTACAAGATCGGAAGAGCGGTTTCAG    |
| chr12 | 132445620 | 132445659 | EP400_10169 | + | GTGACCTATGCACCAGACGTAGGTGCCCTGGCCCTGGGCTGGCCTCTGCAGCAGCAGATCGGAAGAGCGGTTTCAG         |
| chr12 | 132446065 | 132446104 | EP400_10170 | + | GTGACCTATGCACCAGACGTCTGCTCCCCGGGGCTGGGGGGCGCAGCGGGTTTGGGATGAAGATCGGAAGAGCGGTTTCAG    |
| chr1  | 22895857  | 22895896  | EPHA8_10171 | + | GTGACCTATGCACCAGACGTGGCACTGGGGACAACGTCATCCCTCTGTGAGCAGAGAGAGATCGGAAGAGCGGTTTCAG      |
| chr1  | 22903384  | 22903423  | EPHA8_10172 | + | GTGACCTATGCACCAGACGTCATGGCTGGCCATGGGTGTCAGCCGCGCAGCGGTGCTTGGTTCAGATCGGAAGAGCGGTTTCAG |
| chr1  | 22913139  | 22913178  | EPHA8_10173 | + | GTGACCTATGCACCAGACGTCCTCGAGTCCAGTACCCCTGAGCCCAAGACTGGCCCGGAGATCGGAAGAGCGGTTTCAG      |
| chr1  | 22915710  | 22915749  | EPHA8_10174 | + | GTGACCTATGCACCAGACGTAAACTCCGTCCTCCGACGCTGCTGCTCCCGCAGCTTCCCTAGATCGGAAGAGCGGTTTCAG    |
| chr1  | 22915883  | 22915922  | EPHA8_10175 | + | GTGACCTATGCACCAGACGTCACATCTATAAGTAAGAGAAAATCCCAAAGCTCAGAGGCAGATCGGAAGAGCGGTTTCAG     |
| chr1  | 22919954  | 22919993  | EPHA8_10176 | + | GTGACCTATGCACCAGACGTCAGGACGGAGTGGGAGGGGCTGGGCCAGCAGGGCAGGGCCAGATCGGAAGAGCGGTTTCAG    |
| chr1  | 22920190  | 22920229  | EPHA8_10177 | + | GTGACCTATGCACCAGACGTGGAGGGGGCGTGGGCGCGGAGCAGCCAGGTGCCAGGACAGATCGGAAGAGCGGTTTCAG      |
| chr1  | 22921827  | 22921866  | EPHA8_10178 | + | GTGACCTATGCACCAGACGTTGGCCAGCCACCCAGCCCTCTCAAGCACCCGTACAGATCGGAAGAGCGGTTTCAG          |
| chr1  | 22922677  | 22922716  | EPHA8_10179 | + | GTGACCTATGCACCAGACGTGGGCCGGTGGTCTGGGGCAGAGGGCAAGGCCACAGGGGGAAGATCGGAAGAGCGGTTTCAG    |
| chr1  | 22923980  | 22924019  | EPHA8_10180 | + | GTGACCTATGCACCAGACGTGGGGTTGTGAGGGCGGGGCGCAGCATGGGGCAAGGTGGGGGAGATCGGAAGAGCGGTTTCAG   |
| chr1  | 22924365  | 22924404  | EPHA8_10181 | + | GTGACCTATGCACCAGACGTGGCAAAGACAGCCTCCCTGCAGTGCCCTCTGCTGGAGATCGGAAGAGCGGTTTCAG         |
| chr1  | 22924716  | 22924755  | EPHA8_10182 | + | GTGACCTATGCACCAGACGTCACCCTGCCTCTTGCATGGCTGGGGAGGGAGTCCAGAGATCGGAAGAGCGGTTTCAG        |
| chr1  | 22925551  | 22925590  | EPHA8_10183 | + | GTGACCTATGCACCAGACGTCACACTCCTTCCGGCTAGACTGGGAGTGGGGAGATGGCGAGATCGGAAGAGCGGTTTCAG     |
| chr1  | 22927314  | 22927353  | EPHA8_10184 | + | GTGACCTATGCACCAGACGTAGCCCTGGCAGGTCGCGGGCGGTGGAGCCTCAGGGTGCAGATCGGAAGAGCGGTTTCAG      |
| chr1  | 22927592  | 22927631  | EPHA8_10185 | + | GTGACCTATGCACCAGACGTCACCCCTGCTCTTGGAGCCAGCTGCCTCCAGTATTAGATCGGAAGAGCGGTTTCAG         |
| chr1  | 22927977  | 22928016  | EPHA8_10186 | + | GTGACCTATGCACCAGACGTGGTGGGGCTGGGGCCCATGCGTGTGGGGGAGGGGGGGGAGATCGGAAGAGCGGTTTCAG      |
| chr1  | 22928245  | 22928284  | EPHA8_10187 | + | GTGACCTATGCACCAGACGTCAGGGGCCAGGCAGCCACCAAGCCACCCAGGTCATGCAGATCGGAAGAGCGGTTTCAG       |
| chr1  | 22903052  | 22903091  | EPHA8_10188 | + | GTGACCTATGCACCAGACGTACGAGGTCGCAGTGTGGTCCCTCAGCAAGCGCGGCTAGATCGGAAGAGCGGTTTCAG        |
| chr1  | 22915628  | 22915667  | EPHA8_10189 | + | GTGACCTATGCACCAGACGTTCAATGGCGTGTCCGACCTGAGCCCCGAGCCCCGCGGGCAGATCGGAAGAGCGGTTTCAG     |
| chr1  | 23107989  | 23108028  | EPHB2_10190 | + | GTGACCTATGCACCAGACGTGGTCCCAAACTTGCATTTGTCCTCCAGATCCCTCAAGCAGATCGGAAGAGCGGTTTCAG      |
| chr1  | 23111580  | 23111619  | EPHB2_10191 | + | GTGACCTATGCACCAGACGTGGTGGGGCACGTGCCCTGCAAAATGCATAGAAGTGGTTCAGATCGGAAGAGCGGTTTCAG     |
| chr1  | 23189696  | 23189735  | EPHB2_10192 | + | GTGACCTATGCACCAGACGTGGGGCCCTCAAGGGCGATGGCTGGCCGAGTCCCAGGTCTAAGATCGGAAGAGCGGTTTCAG    |
| chr1  | 23191716  | 23191755  | EPHB2_10193 | + | GTGACCTATGCACCAGACGTCGACGTGGGCCAGGGGAGTGGCCCATCGCGCTGTGCCAGAGATCGGAAGAGCGGTTTCAG     |
| chr1  | 23208987  | 23209026  | EPHB2_10194 | + | GTGACCTATGCACCAGACGTCGCTGGGTGCTGTCCCATCACCCACCTCCCTGAGGGCCCCAGATCGGAAGAGCGGTTTCAG    |
| chr1  | 23219550  | 23219589  | EPHB2_10195 | + | GTGACCTATGCACCAGACGTTCCAGGGGCAAGAGGAGGGGCACAGACTCCACAACAAGAAAGATCGGAAGAGCGGTTTCAG    |
| chr1  | 23222084  | 23222123  | EPHB2_10196 | + | GTGACCTATGCACCAGACGTTCTCCAGGTTGGCCAGGCTGGCTGTCCAGATGGCTTCAGATCGGAAGAGCGGTTTCAG       |
| chr1  | 23222982  | 23223021  | EPHB2_10197 | + | GTGACCTATGCACCAGACGTACCCAAGCGGGCTGGAACCCCTGGGCCCTTCACTGTGGTGTAGATCGGAAGAGCGGTTTCAG   |
| chr1  | 23232613  | 23232652  | EPHB2_10198 | + | GTGACCTATGCACCAGACGTGGTACTCTCACATGTACTATGACCTTAGCCATGGCTGGTGTAGATCGGAAGAGCGGTTTCAG   |
| chr1  | 23233461  | 23233500  | EPHB2_10199 | + | GTGACCTATGCACCAGACGTCGAAGAGGGCCAGGGGCCATGAATGGGGCAGGAAAAGGAAGATCGGAAGAGCGGTTTCAG     |
| chr1  | 23234672  | 23234711  | EPHB2_10200 | + | GTGACCTATGCACCAGACGTGGCAGGGAACACCGGAGTTCACAGAGCCAGAGAAGAGGGCAAGATCGGAAGAGCGGTTTCAG   |
| chr1  | 23235675  | 23235714  | EPHB2_10201 | + | GTGACCTATGCACCAGACGTAAGGGGATAGGCAAGCCCTCTGGCCACCCAGATGGGAGAGATCGGAAGAGCGGTTTCAG      |
| chr1  | 23237079  | 23237118  | EPHB2_10202 | + | GTGACCTATGCACCAGACGTACCCTGGCCCTGCCAGCCAGGCCCTGCCCTTCCCGAGATCGGAAGAGCGGTTTCAG         |
| chr1  | 23239103  | 23239142  | EPHB2_10203 | + | GTGACCTATGCACCAGACGTAGCCACTTCTGCTTGTACCTTAGCACCCCTCTCCACCGAGATCGGAAGAGCGGTTTCAG      |
| chr1  | 23240074  | 23240113  | EPHB2_10204 | + | GTGACCTATGCACCAGACGTCCTCGGCTCACCTTCTCCAAGCCCCGCCCTCTGCCAGATCGGAAGAGCGGTTTCAG         |
| chr1  | 23111237  | 23111276  | EPHB2_10205 | + | GTGACCTATGCACCAGACGTACACCGAGGTGCGGAGCTTCGACCTGTGTCCGCGAGCGGAGATCGGAAGAGCGGTTTCAG     |
| chr21 | 39755856  | 39755895  | ERG_10206   | + | GTGACCTATGCACCAGACGTCAGGAGAGGAAGAAAACCTCAGTGAGCACAGGTTCCAGGAGATCGGAAGAGCGGTTTCAG     |
| chr21 | 39762975  | 39763014  | ERG_10207   | + | GTGACCTATGCACCAGACGTAAGAAAAGTAAAGCTTCAATATGTAACATAGTAGATCGGAAGAGCGGTTTCAG            |
| chr21 | 39763648  | 39763687  | ERG_10208   | + | GTGACCTATGCACCAGACGTAGAATACAAAGCAATTAGCTATAACAGATTTGGTTCACAGATCGGAAGAGCGGTTTCAG      |



|       |          |          |             |   |                                                                                     |
|-------|----------|----------|-------------|---|-------------------------------------------------------------------------------------|
| chr21 | 39764377 | 39764416 | ERG_10209   | + | GTGACCTATGCACCAGACGTAAATAAATTGACTAAAAGATCAATCATGTAATTTTTATAAAGATCGGAAGAGCGGTTTCAG   |
| chr21 | 39772578 | 39772617 | ERG_10210   | + | GTGACCTATGCACCAGACGTAAAGGAAAGACAAACATGTGAAGGCTTTTTGTTGGTTGTAGATCGGAAGAGCGGTTTCAG    |
| chr21 | 39774570 | 39774609 | ERG_10211   | + | GTGACCTATGCACCAGACGTAAACAAAAAGCGACATCAAATGAAAAAAGAGAGAGATCGGAAGAGCGGTTTCAG          |
| chr21 | 39775642 | 39775681 | ERG_10212   | + | GTGACCTATGCACCAGACGTTGGGAACACATTCACTCAATTCCTGAAGCCAGGGATCTTCAGATCGGAAGAGCGGTTTCAG   |
| chr21 | 39795454 | 39795493 | ERG_10213   | + | GTGACCTATGCACCAGACGTTTGGCCACACTGCATTCATCAGGAGAGTTCTCGAGGAGAGATCGGAAGAGCGGTTTCAG     |
| chr21 | 39795494 | 39795533 | ERG_10214   | + | GTGACCTATGCACCAGACGTAGAATAATTCTCCATTATAACAGCAATCAAAGAGCATGTAGATCGGAAGAGCGGTTTCAG    |
| chr21 | 39817555 | 39817594 | ERG_10215   | + | GTGACCTATGCACCAGACGTAAAGAAACACATAATTCAAGACACTCCAACAGACAGTCATAGATCGGAAGAGCGGTTTCAG   |
| chr21 | 39870315 | 39870354 | ERG_10216   | + | GTGACCTATGCACCAGACGTAGTTTATTGATCGTTAATAAATGTTAATAATAATTATTGCAGATCGGAAGAGCGGTTTCAG   |
| chr21 | 39947635 | 39947674 | ERG_10217   | + | GTGACCTATGCACCAGACGTAAAGCCAGCCATCTACCAGCTGTTCCAGAACCTGACGGCTAAGATCGGAAGAGCGGTTTCAG  |
| chr21 | 39755595 | 39755634 | ERG_10218   | + | GTGACCTATGCACCAGACGTGAACTTGTAGGCGTAGCGCTTCCCATGGACCTTGGTCATGAGATCGGAAGAGCGGTTTCAG   |
| chr11 | 44129809 | 44129848 | EXT2_10219  | + | GTGACCTATGCACCAGACGTCTCATACAGCCCAGCCCCAGGAGATACTTGAGTGGCCCTAGATCGGAAGAGCGGTTTCAG    |
| chr11 | 44130844 | 44130883 | EXT2_10220  | + | GTGACCTATGCACCAGACGTTATTTGGGGCTGCCTTATGATGGGTTCAAGATCATTTTGAGATCGGAAGAGCGGTTTCAG    |
| chr11 | 44135862 | 44135901 | EXT2_10221  | + | GTGACCTATGCACCAGACGTTTCATCCAGCCAGCGGTGTCCTTTACTGAATCTGTAGATAGATCGGAAGAGCGGTTTCAG    |
| chr11 | 44146545 | 44146584 | EXT2_10222  | + | GTGACCTATGCACCAGACGTTTCATTACCTCTCGCAAAGGCTCAGGAGAGTTTGCTTACAAGATCGGAAGAGCGGTTTCAG   |
| chr11 | 44148516 | 44148555 | EXT2_10223  | + | GTGACCTATGCACCAGACGTCTCTTAGTAACTCTACATTAGTGGTTCTGCGTATATAAGATCGGAAGAGCGGTTTCAG      |
| chr11 | 44151699 | 44151738 | EXT2_10224  | + | GTGACCTATGCACCAGACGTAAAGTCTTGGGGAGGTGACATGGGTGGTACCAGAAATGGTGGAGATCGGAAGAGCGGTTTCAG |
| chr11 | 44193303 | 44193342 | EXT2_10225  | + | GTGACCTATGCACCAGACGTTCCAGTGCATGCCACATGAGGCAATGGTCCAGCTGCAGGGAGATCGGAAGAGCGGTTTCAG   |
| chr11 | 44219579 | 44219618 | EXT2_10226  | + | GTGACCTATGCACCAGACGTTTAGTGCCCTCTCAGCTGAGCAATTTGGATGGCCAAAAGATCGGAAGAGCGGTTTCAG      |
| chr11 | 44228520 | 44228559 | EXT2_10227  | + | GTGACCTATGCACCAGACGTTTACACAGTGTGTTTATATGTTAATAATTACTTCTATGAGATCGGAAGAGCGGTTTCAG     |
| chr11 | 44254057 | 44254096 | EXT2_10228  | + | GTGACCTATGCACCAGACGTGCAGTCTGGCAAGGTGACAAAAGTGAAGAAATGATACACAGATCGGAAGAGCGGTTTCAG    |
| chr11 | 44257936 | 44257975 | EXT2_10229  | + | GTGACCTATGCACCAGACGTCTCCAACAAAAGTGCGCCTTAGCCTCTGATCTCTATTTCAGATCGGAAGAGCGGTTTCAG    |
| chr11 | 44265848 | 44265887 | EXT2_10230  | + | GTGACCTATGCACCAGACGTTGGTGGAGGTCTGAATGTGAGGCTGGGACAGAGGGAGAGAAGATCGGAAGAGCGGTTTCAG   |
| chr11 | 44129541 | 44129580 | EXT2_10231  | + | GTGACCTATGCACCAGACGTCTATCGCTGTGGCTTCAACCCAAAAGAACAAAATCAAGGTGAGATCGGAAGAGCGGTTTCAG  |
| chr9  | 97864143 | 97864182 | FANCC_10232 | + | GTGACCTATGCACCAGACGTGACAGAAGAAGGCAAAATAAAACACTTTCCAGACAGATAGATCGGAAGAGCGGTTTCAG     |
| chr9  | 97869562 | 97869601 | FANCC_10233 | + | GTGACCTATGCACCAGACGTGATTTTACAGGGGAGAGGTTAGGAAGAGGCAGGACAGACAGATCGGAAGAGCGGTTTCAG    |
| chr9  | 97873930 | 97873969 | FANCC_10234 | + | GTGACCTATGCACCAGACGTGGCAGAACACATGGCAGTTGACAACCTAAATTTCTTCCAGATCGGAAGAGCGGTTTCAG     |
| chr9  | 97877003 | 97877042 | FANCC_10235 | + | GTGACCTATGCACCAGACGTAGAGAGATACGTGACAGGGCAACTGAGGAAATGTCAAGCCAGATCGGAAGAGCGGTTTCAG   |
| chr9  | 97879683 | 97879722 | FANCC_10236 | + | GTGACCTATGCACCAGACGTAGAAAATCCAAGAGCATGAACATTAAGATTGAAACGGAGATCGGAAGAGCGGTTTCAG      |
| chr9  | 97887478 | 97887517 | FANCC_10237 | + | GTGACCTATGCACCAGACGTGAAAAGTCAGATCAAGACAGTAACTAAACAAGTAATCCGGCAAGATCGGAAGAGCGGTTTCAG |
| chr9  | 97888874 | 97888913 | FANCC_10238 | + | GTGACCTATGCACCAGACGTAGAAGACCATGAGAATGTGAAATATCAAGCACTTTTCTAGATCGGAAGAGCGGTTTCAG     |
| chr9  | 97897795 | 97897834 | FANCC_10239 | + | GTGACCTATGCACCAGACGTGAAATAAAAATAAATTTAAACAGAAATGGCTCACTGAAAAGATCGGAAGAGCGGTTTCAG    |
| chr9  | 97912380 | 97912419 | FANCC_10240 | + | GTGACCTATGCACCAGACGTAAATAAGAAATAACTCAAAATTAAGAGCCATGCATAATAGATCGGAAGAGCGGTTTCAG     |
| chr9  | 97933436 | 97933475 | FANCC_10241 | + | GTGACCTATGCACCAGACGTAAATCAGTTGCAGGTTAACTCACGCTGCAAACAGGATTACAGATCGGAAGAGCGGTTTCAG   |
| chr9  | 97934440 | 97934479 | FANCC_10242 | + | GTGACCTATGCACCAGACGTAAACAGAAAAATTAACCTCTTTAAAAGTAAATGCAAGTAGATCGGAAGAGCGGTTTCAG     |
| chr9  | 98003036 | 98003075 | FANCC_10243 | + | GTGACCTATGCACCAGACGTGAAAACCTAATAAGTTTTATCAAGCAGAAAAAATCATTAAAGATCGGAAGAGCGGTTTCAG   |
| chr9  | 98009809 | 98009848 | FANCC_10244 | + | GTGACCTATGCACCAGACGTAAATAAATAAATTTGGTCAGTAAAGGCATTATGCAACTTAGAAGATCGGAAGAGCGGTTTCAG |
| chr9  | 98011584 | 98011623 | FANCC_10245 | + | GTGACCTATGCACCAGACGTGCGAAAAGGTGATGTCCCTTACAGCAGCCTGTCCAGCACAGATCGGAAGAGCGGTTTCAG    |
| chr9  | 35074224 | 35074263 | FANCG_10246 | + | GTGACCTATGCACCAGACGTAGAAGGATGATGCCTAAGGGTGAAGATTGGCAGAAAGCTAGATCGGAAGAGCGGTTTCAG    |
| chr9  | 35074502 | 35074541 | FANCG_10247 | + | GTGACCTATGCACCAGACGTAGCCAGAGTACAGAGTCTTAGAACTTGACATAGTCTTAGAGATCGGAAGAGCGGTTTCAG    |
| chr9  | 35075090 | 35075129 | FANCG_10248 | + | GTGACCTATGCACCAGACGTCTCCAAAGTCAAGAAGTGTCTCCAGCCTCACAGTCACAGATCGGAAGAGCGGTTTCAG      |
| chr9  | 35075333 | 35075372 | FANCG_10249 | + | GTGACCTATGCACCAGACGTACACAGAACAGGGGTGAAGAGGAATCAAACTTTCAGAACTCAGATCGGAAGAGCGGTTTCAG  |
| chr9  | 35075762 | 35075801 | FANCG_10250 | + | GTGACCTATGCACCAGACGTAGAAGAAGCAGTGTCTTGAAGGCATGAGCCACCATCCAGATCGGAAGAGCGGTTTCAG      |
| chr9  | 35076036 | 35076075 | FANCG_10251 | + | GTGACCTATGCACCAGACGTAAAGCCATAAGCTCACCTAGGCCCTAGCAGGGAACCTAGATCGGAAGAGCGGTTTCAG      |
| chr9  | 35076591 | 35076630 | FANCG_10252 | + | GTGACCTATGCACCAGACGTAAAGAAAAAATTTGATCTATAATCTTTGGGAGCCATACTTAGATCGGAAGAGCGGTTTCAG   |
| chr9  | 35076878 | 35076917 | FANCG_10253 | + | GTGACCTATGCACCAGACGTAGGAGGACCGGGCTCAGTACCCTTACAAGCAAAAAGAGATCGGAAGAGCGGTTTCAG       |
| chr9  | 35077109 | 35077148 | FANCG_10254 | + | GTGACCTATGCACCAGACGTTCAGGGTGTGAGCTTGGAGGCTATAGAGCAGGGTCAAGATCGGAAGAGCGGTTTCAG       |
| chr9  | 35077407 | 35077446 | FANCG_10255 | + | GTGACCTATGCACCAGACGTAAAGGACAACCAAGAGCTCAAGGCTCAAACTCCTCGTCTAGATCGGAAGAGCGGTTTCAG    |
| chr9  | 35078351 | 35078390 | FANCG_10256 | + | GTGACCTATGCACCAGACGTTACACACACATAGACACACACAGCTGAAGTAGCACCAGATCGGAAGAGCGGTTTCAG       |
| chr9  | 35078744 | 35078783 | FANCG_10257 | + | GTGACCTATGCACCAGACGTAAATGTTGGTCTTACAGACTGCTCCCCATGGAAGATCCTCAGATCGGAAGAGCGGTTTCAG   |
| chr9  | 35079249 | 35079288 | FANCG_10258 | + | GTGACCTATGCACCAGACGTAGGGAGGGGTTGCTCACTGAGGATCAATCTTTTTTCTCCAGATCGGAAGAGCGGTTTCAG    |
| chr9  | 35079532 | 35079571 | FANCG_10259 | + | GTGACCTATGCACCAGACGTGCTGGCCCCGAGACCCAGAACCGGCTTAGGAAGGGTGAAGATCGGAAGAGCGGTTTCAG     |
| chr1  | 11168354 | 11168393 | MTOR_10260  | + | GTGACCTATGCACCAGACGTAGAAACATAAATCTTACTCTTCTGGCAATCGATGCAGATCGGAAGAGCGGTTTCAG        |
| chr1  | 11169438 | 11169477 | MTOR_10261  | + | GTGACCTATGCACCAGACGTCAAAGTAGAAATAACTGTAAGAATGGGAGCAATACAACAAGATCGGAAGAGCGGTTTCAG    |
| chr1  | 11169797 | 11169836 | MTOR_10262  | + | GTGACCTATGCACCAGACGTAGAATAATCAATTAACAGAAAATCAAACACCAAAAAGCCACAGATCGGAAGAGCGGTTTCAG  |
| chr1  | 11172985 | 11173024 | MTOR_10263  | + | GTGACCTATGCACCAGACGTAAATAAAGAGTATTGAAACATGCTTCAAATTTTGACTTGAAGATCGGAAGAGCGGTTTCAG   |
| chr1  | 11174521 | 11174560 | MTOR_10264  | + | GTGACCTATGCACCAGACGTGACAGAGCCACTCACCACAGGAGTTACTAACTCTCCACCAGATCGGAAGAGCGGTTTCAG    |
| chr1  | 11174955 | 11174994 | MTOR_10265  | + | GTGACCTATGCACCAGACGTATAAATGGGAAAAGCCAAATCAATGTTTATTCTTTACCAGATCGGAAGAGCGGTTTCAG     |
| chr1  | 11175536 | 11175575 | MTOR_10266  | + | GTGACCTATGCACCAGACGTAGAAGACGATGAGGAGGGATCAACAGAGATAACGGATAGATCGGAAGAGCGGTTTCAG      |

|      |           |           |             |   |                                                                                      |
|------|-----------|-----------|-------------|---|--------------------------------------------------------------------------------------|
| chr1 | 11177154  | 11177193  | MTOR_10267  | + | GTGACCTATGCACCAGACGTGGAGTGCATGTGAACTACGGTTCTGGAACTTTAATTTCAAGATCGGAAGAGCGGTTTCAG     |
| chr1 | 11181436  | 11181475  | MTOR_10268  | + | GTGACCTATGCACCAGACGTACACAACCTGTTACAGTAAGAGAGCAGCCTAAGACATGTAGTAGATCGGAAGAGCGGTTTCAG  |
| chr1 | 11182194  | 11182233  | MTOR_10269  | + | GTGACCTATGCACCAGACGTACAGAAAAGCAGGGTTAGTGTACCGTAAAGAGAGTATACCCAGATCGGAAGAGCGGTTTCAG   |
| chr1 | 11184701  | 11184740  | MTOR_10270  | + | GTGACCTATGCACCAGACGTCAAGTGGGAGCGGTGAGTGTACATCAGAGTCCCTCAGCTCTAGATCGGAAGAGCGGTTTCAG   |
| chr1 | 11186864  | 11186903  | MTOR_10271  | + | GTGACCTATGCACCAGACGTTTACCAAAGGATTTAGTGTCTGCCTCCAGGGAAGAAATTTAGATCGGAAGAGCGGTTTCAG    |
| chr1 | 11187212  | 11187251  | MTOR_10272  | + | GTGACCTATGCACCAGACGTAAAGCAGGACGTTTCAAGTTATCAAAGTCTCAACCAACAGATCGGAAGAGCGGTTTCAG      |
| chr1 | 11187874  | 11187913  | MTOR_10273  | + | GTGACCTATGCACCAGACGTGAAAAGAGGAGGAAGACATCAAGAAATCAGCTAACCTCAGAGATCGGAAGAGCGGTTTCAG    |
| chr1 | 11188194  | 11188233  | MTOR_10274  | + | GTGACCTATGCACCAGACGTAAACAGAAGAAACATCTATAAAGGAAATGTGGGTTGGGAAAAGATCGGAAGAGCGGTTTCAG   |
| chr1 | 11188620  | 11188659  | MTOR_10275  | + | GTGACCTATGCACCAGACGTAAAAGACACAGTATGTAGCATATGAGACTTGAACAACCTAAGATCGGAAGAGCGGTTTCAG    |
| chr1 | 11189019  | 11189058  | MTOR_10276  | + | GTGACCTATGCACCAGACGTAAATGAGAAAAGTACAGAAAATTTAGTTCCAGATTTTTGCAGATCGGAAGAGCGGTTTCAG    |
| chr1 | 11190845  | 11190884  | MTOR_10277  | + | GTGACCTATGCACCAGACGTAGAAAAGGCAAGGACAGACACTGGAGCTGTGACCAACAGCAAGATCGGAAGAGCGGTTTCAG   |
| chr1 | 11193265  | 11193304  | MTOR_10278  | + | GTGACCTATGCACCAGACGTAGAAAACAGCCCCATGACATTCCTCCTCAAACAGCCAGATCGGAAGAGCGGTTTCAG        |
| chr1 | 11194534  | 11194573  | MTOR_10279  | + | GTGACCTATGCACCAGACGTACAAGGCACAGAGGCCACTTGGCTTGTGGCCAGCTTCAGATCGGAAGAGCGGTTTCAG       |
| chr1 | 11199503  | 11199542  | MTOR_10280  | + | GTGACCTATGCACCAGACGTAGAGAAAAGTGGGTTATAGACAGAACTGGACAGCCAGGGAAGATCGGAAGAGCGGTTTCAG    |
| chr1 | 11204823  | 11204862  | MTOR_10281  | + | GTGACCTATGCACCAGACGTCAAATCGCATTCCAACCTAATTACTGCACGAAACCTCAAAGATCGGAAGAGCGGTTTCAG     |
| chr1 | 11205113  | 11205152  | MTOR_10282  | + | GTGACCTATGCACCAGACGTAAACAACCTTTGGGACTGAGCTGTGGACTTGGGAGCTTAGGAGATCGGAAGAGCGGTTTCAG   |
| chr1 | 11206859  | 11206898  | MTOR_10283  | + | GTGACCTATGCACCAGACGTACACATAGACAGAAAAGCTCAAGGGGGTGGCTGGTTGGGAGATCGGAAGAGCGGTTTCAG     |
| chr1 | 11210294  | 11210333  | MTOR_10284  | + | GTGACCTATGCACCAGACGTGAATTATATAGTACAGTAATCCAATCTCCTTAACTAAGATCGGAAGAGCGGTTTCAG        |
| chr1 | 11217359  | 11217398  | MTOR_10285  | + | GTGACCTATGCACCAGACGTGAAAAGAAAAGACTGCTGTGAGGTACACAGAAGGATCGATCGGAAGAGCGGTTTCAG        |
| chr1 | 11227585  | 11227624  | MTOR_10286  | + | GTGACCTATGCACCAGACGTAAAGGGAAAAGGTAGTTACTCAACAGGCTGAGGGTAGAGATCGGAAGAGCGGTTTCAG       |
| chr1 | 11259471  | 11259510  | MTOR_10287  | + | GTGACCTATGCACCAGACGTGCAAACCTCACAGCACAGGAAAATGGCAGATGGGGCACAAGATCGGAAGAGCGGTTTCAG     |
| chr1 | 11259771  | 11259810  | MTOR_10288  | + | GTGACCTATGCACCAGACGTAGAAGGTGGAAGGAGACCTCCCGTGCCTCTGCCTGAGATCGGAAGAGCGGTTTCAG         |
| chr1 | 11264771  | 11264810  | MTOR_10289  | + | GTGACCTATGCACCAGACGTACAGGTGACAATGGAAAACATCAGTTTCAAGGGCCAATTAGATCGGAAGAGCGGTTTCAG     |
| chr1 | 11269526  | 11269565  | MTOR_10290  | + | GTGACCTATGCACCAGACGTAGATTATAGAAAACCTATAACTCTACTAGATGCTTCTAGATCGGAAGAGCGGTTTCAG       |
| chr1 | 11270974  | 11271013  | MTOR_10291  | + | GTGACCTATGCACCAGACGTAGGGGGAAGAGATGAGAAAATCATTCTGGAGAGTGGAGAGATCGGAAGAGCGGTTTCAG      |
| chr1 | 11272542  | 11272581  | MTOR_10292  | + | GTGACCTATGCACCAGACGTCACTAACATACAGTAACTGCTAACATCAATCTCCAAGGAAGATCGGAAGAGCGGTTTCAG     |
| chr1 | 11272976  | 11273015  | MTOR_10293  | + | GTGACCTATGCACCAGACGTGAGCAAAAGCATGGTGATGAATAGTCAGTCCCAAGTATCAGATCGGAAGAGCGGTTTCAG     |
| chr1 | 11273634  | 11273673  | MTOR_10294  | + | GTGACCTATGCACCAGACGTAGAAAAGTCAAGGGAGCTGAGTCAAGTCCCTTTCTGATGAAGATCGGAAGAGCGGTTTCAG    |
| chr1 | 11276302  | 11276341  | MTOR_10295  | + | GTGACCTATGCACCAGACGTCAAGAGTCAACCGTGGTATCATGAAGGACATTGAACAGATCGGAAGAGCGGTTTCAG        |
| chr1 | 11288986  | 11289025  | MTOR_10296  | + | GTGACCTATGCACCAGACGTACAACAGAGAGTGTTAGAGCTACACATGGCATGACGTGACAGATCGGAAGAGCGGTTTCAG    |
| chr1 | 11291122  | 11291161  | MTOR_10297  | + | GTGACCTATGCACCAGACGTAAAGGGAGGGAAGAAAACATTCATCACAAATGATTAGATCGGAAGAGCGGTTTCAG         |
| chr1 | 11291502  | 11291541  | MTOR_10298  | + | GTGACCTATGCACCAGACGTACAAGAACACGATTCAATGAGCCAGTACGAGAGAAAAGAAAGATCGGAAGAGCGGTTTCAG    |
| chr1 | 11292596  | 11292635  | MTOR_10299  | + | GTGACCTATGCACCAGACGTAAAAAGAGGGTGGCAGAAAGGGTTAGAAATCTGGCATTAAAGATCGGAAGAGCGGTTTCAG    |
| chr1 | 11293555  | 11293594  | MTOR_10300  | + | GTGACCTATGCACCAGACGTAAAGTTATGAAAATGAATGCAGATTAGACTCTACTAGAAAAGATCGGAAGAGCGGTTTCAG    |
| chr1 | 11294333  | 11294372  | MTOR_10301  | + | GTGACCTATGCACCAGACGTGAAAAGGCTCAATATTTCTCTATGGCAGAAAGACATTCTAGAAGATCGGAAGAGCGGTTTCAG  |
| chr1 | 11298116  | 11298155  | MTOR_10302  | + | GTGACCTATGCACCAGACGTAAAGGACCTTTGAACATTTCTCATGATCCCATCACTCCAGATCGGAAGAGCGGTTTCAG      |
| chr1 | 11298685  | 11298724  | MTOR_10303  | + | GTGACCTATGCACCAGACGTAGGCAGAGAGAAAACAGAATAAACACTGCTGCTGTAGACAAGATCGGAAGAGCGGTTTCAG    |
| chr1 | 11300615  | 11300654  | MTOR_10304  | + | GTGACCTATGCACCAGACGTGAAAACAAGTACATAAGGGCTGGGCACATGACACTCAGTAGATCGGAAGAGCGGTTTCAG     |
| chr1 | 11301749  | 11301788  | MTOR_10305  | + | GTGACCTATGCACCAGACGTATGGAGAGTGGCTAGTTGAGACATAATGACATTTCTTAATAGATCGGAAGAGCGGTTTCAG    |
| chr1 | 11303368  | 11303407  | MTOR_10306  | + | GTGACCTATGCACCAGACGTAAAAGACAAGATAGATGCTCCAGGTCAGGGTTAGGGTCTAGATCGGAAGAGCGGTTTCAG     |
| chr1 | 11307801  | 11307840  | MTOR_10307  | + | GTGACCTATGCACCAGACGTAAAGGATAAAGGGTTGGCAGGGAAGGATGAGGTGGAGCAGATCGGAAGAGCGGTTTCAG      |
| chr1 | 11308162  | 11308201  | MTOR_10308  | + | GTGACCTATGCACCAGACGTGAGGAGGAAAAAATCATCTTTACTTATGACTGGCATTCAAGATCGGAAGAGCGGTTTCAG     |
| chr1 | 11314041  | 11314080  | MTOR_10309  | + | GTGACCTATGCACCAGACGTAGACAGGGTGCTTCAATAGACAGAGTACAACCCAGAAGATCGGAAGAGCGGTTTCAG        |
| chr1 | 11316260  | 11316299  | MTOR_10310  | + | GTGACCTATGCACCAGACGTAAAGCAAACCCGAGAACTCTCATTGGTACCAGAGTTTTTGTTCAGATCGGAAGAGCGGTTTCAG |
| chr1 | 11317233  | 11317272  | MTOR_10311  | + | GTGACCTATGCACCAGACGTGAGGAAAGGCAAAAGGTGATGATGGGGCGTATGCTGGCCAGAGATCGGAAGAGCGGTTTCAG   |
| chr1 | 11318661  | 11318700  | MTOR_10312  | + | GTGACCTATGCACCAGACGTAGATAATAAGACAACAACTTCTAATAATTCTAATCTGAGATCGGAAGAGCGGTTTCAG       |
| chr1 | 11319477  | 11319516  | MTOR_10313  | + | GTGACCTATGCACCAGACGTGGTTCTTTAGAGAGAAGTTTCTTTAATATTCTGGATAAGAGATCGGAAGAGCGGTTTCAG     |
| chrX | 48649747  | 48649786  | GATA1_10314 | + | GTGACCTATGCACCAGACGTTGAGTGGCTGTCTTGGCATTGGCTGAGTGTCTTTGGGGTTAGATCGGAAGAGCGGTTTCAG    |
| chrX | 48650639  | 48650678  | GATA1_10315 | + | GTGACCTATGCACCAGACGTCAAAAAAGGACAGGGAAGTTGAGGTGGGAGGGGTGGCCAAAGATCGGAAGAGCGGTTTCAG    |
| chrX | 48650886  | 48650925  | GATA1_10316 | + | GTGACCTATGCACCAGACGTAGACCTGCTTCACTTATACACAGGAACCCCTGTCCTCACAGATCGGAAGAGCGGTTTCAG     |
| chrX | 48652582  | 48652621  | GATA1_10317 | + | GTGACCTATGCACCAGACGTATGGCTCCAGAGGAGGGTGGTGTCTTCTCCTTGTAGATCGGAAGAGCGGTTTCAG          |
| chr3 | 155588697 | 155588736 | GMPS_10318  | + | GTGACCTATGCACCAGACGTGGTCCCTGACAGACCCTCCCGCGGAGGCGTAGGCTCCAGATCGGAAGAGCGGTTTCAG       |
| chr3 | 155611499 | 155611538 | GMPS_10319  | + | GTGACCTATGCACCAGACGTCACTAATCTTTTTCATGAGGAGATTGAACCTAGATTGTGGAAGATCGGAAGAGCGGTTTCAG   |
| chr3 | 155615841 | 155615880 | GMPS_10320  | + | GTGACCTATGCACCAGACGTAAATTTGTTTTGAAAGCTTACTTATATTTTATCTGTTTGGATCGGAAGAGCGGTTTCAG      |
| chr3 | 155621760 | 155621799 | GMPS_10321  | + | GTGACCTATGCACCAGACGTTTTAGATGAATAAGACAATAGTAATTAATAATTTAAAGAGATCGGAAGAGCGGTTTCAG      |
| chr3 | 155624063 | 155624102 | GMPS_10322  | + | GTGACCTATGCACCAGACGTTAAAAATTTGCAGAGTTCATTTAAAAAATTTATCTGAAAGATCGGAAGAGCGGTTTCAG      |
| chr3 | 155628685 | 155628724 | GMPS_10323  | + | GTGACCTATGCACCAGACGTATTATCTGGAACTTACAATAATTTATCAATAATTTGAGATCGGAAGAGCGGTTTCAG        |
| chr3 | 155629079 | 155629118 | GMPS_10324  | + | GTGACCTATGCACCAGACGTACTCCAGAAAAGTTAATCTACATGTTAGGACTGTTTAAATAGATCGGAAGAGCGGTTTCAG    |

|       |           |           |              |   |                                                                                    |
|-------|-----------|-----------|--------------|---|------------------------------------------------------------------------------------|
| chr3  | 155632370 | 155632409 | GMPS_10325   | + | GTGACCTATGCACCAGACGTTTTTAATATCCTCAACATGTACTATTTTTGATGTGAATCTAGATCGGAAGAGCGGTTTCAG  |
| chr3  | 155633992 | 155634031 | GMPS_10326   | + | GTGACCTATGCACCAGACGTTGAAAACCTTTTTTCATAAAGTAGATACATGGAAGTCTTCAGATCGGAAGAGCGGTTTCAG  |
| chr3  | 155637138 | 155637177 | GMPS_10327   | + | GTGACCTATGCACCAGACGTGAACGAATTTTTGTTTGATTTCATCTTTAGACCTTCATGTTAGATCGGAAGAGCGGTTTCAG |
| chr3  | 155640102 | 155640141 | GMPS_10328   | + | GTGACCTATGCACCAGACGTATACAGCTAATCATTACAAGAAATTGAACGGATTCTTATTAGATCGGAAGAGCGGTTTCAG  |
| chr3  | 155649680 | 155649719 | GMPS_10329   | + | GTGACCTATGCACCAGACGTCAGGAGACTAGGGTGGGGGCTTGTAATGGAAGGATGTATAGATCGGAAGAGCGGTTTCAG   |
| chr3  | 155652846 | 155652885 | GMPS_10330   | + | GTGACCTATGCACCAGACGTCATGTTTTGATTACTACCCCTCTGAAACTAGTTTTGGAAAGATCGGAAGAGCGGTTTCAG   |
| chr3  | 155654310 | 155654349 | GMPS_10331   | + | GTGACCTATGCACCAGACGTATTTTTTTCTAATGCAGCGTTCGAACTCTTACATTTAGATCGGAAGAGCGGTTTCAG      |
| chr3  | 155655492 | 155655531 | GMPS_10332   | + | GTGACCTATGCACCAGACGTGTTCTATTAAGTACCGTGTGCAGTTTAAATTGATTAGAAAGATCGGAAGAGCGGTTTCAG   |
| chrX  | 132670332 | 132670371 | GPC3_10333   | + | GTGACCTATGCACCAGACGTAAAGAGAAGGATTTGAAATGCAAGTCTACCCATAGCCTCAAGATCGGAAGAGCGGTTTCAG  |
| chrX  | 132730638 | 132730677 | GPC3_10334   | + | GTGACCTATGCACCAGACGTACAACCAGGAATGCATCAGCTCTTCATATTTCTCAGGTGGAGATCGGAAGAGCGGTTTCAG  |
| chrX  | 132795889 | 132795928 | GPC3_10335   | + | GTGACCTATGCACCAGACGTGAAGGTAAGAAAGGGTTTGTCAAAGAAAGTCCCAAACAAAGATCGGAAGAGCGGTTTCAG   |
| chrX  | 132826533 | 132826572 | GPC3_10336   | + | GTGACCTATGCACCAGACGTAAACAAAACATCTGTGCATAAGAGGCAAGTAACTCAGTATAGATCGGAAGAGCGGTTTCAG  |
| chrX  | 132834067 | 132834106 | GPC3_10337   | + | GTGACCTATGCACCAGACGTAAATGCAATATAATTATAGGCTACTTGTGCAGATATGATAAGATCGGAAGAGCGGTTTCAG  |
| chrX  | 132888214 | 132888253 | GPC3_10338   | + | GTGACCTATGCACCAGACGTAAAAAAAAGAGACACAAAAATGTGTACAAATTAAGCAAGATCGGAAGAGCGGTTTCAG     |
| chrX  | 133087249 | 133087288 | GPC3_10339   | + | GTGACCTATGCACCAGACGTCAAGGTTTTTCATGTTTCAGTAAGCAGGATCTCTCTCACAGATCGGAAGAGCGGTTTCAG   |
| chrX  | 133119487 | 133119526 | GPC3_10340   | + | GTGACCTATGCACCAGACGTAGGGAGCTAGGAGAGCGCGGGAGAGTGGCAGCCGGAGCGAAGATCGGAAGAGCGGTTTCAG  |
| chrX  | 132887866 | 132887905 | GPC3_10341   | + | GTGACCTATGCACCAGACGTGACTTGCAGTGTGAAACCTGGGTCTATAAAGCTTGGATCGGAAGAGCGGTTTCAG        |
| chr2  | 239974843 | 239974882 | HDAC4_10342  | + | GTGACCTATGCACCAGACGTGCAAGAGAAGGAGATGGGGCGTGGGGCAGGTGCACCACAGATCGGAAGAGCGGTTTCAG    |
| chr2  | 239975308 | 239975347 | HDAC4_10343  | + | GTGACCTATGCACCAGACGTGGGGTGAGGAAAGTCGCTCAGTGACTACAACCTAGCAGGAAGATCGGAAGAGCGGTTTCAG  |
| chr2  | 239976540 | 239976579 | HDAC4_10344  | + | GTGACCTATGCACCAGACGTATGCATAAGAATATAAAGACTGCCAATATAATCCACACGTAGATCGGAAGAGCGGTTTCAG  |
| chr2  | 239988562 | 239988601 | HDAC4_10345  | + | GTGACCTATGCACCAGACGTAAACGGGAGACTGCAGTGTGAACGGGGAGGACCAGCCAGATCGGAAGAGCGGTTTCAG     |
| chr2  | 239990314 | 239990353 | HDAC4_10346  | + | GTGACCTATGCACCAGACGTCAAGGAGAAGGCGTTACTGGGTGAGCTGAAAGAGGGACGGGAGATCGGAAGAGCGGTTTCAG |
| chr2  | 240002899 | 240002938 | HDAC4_10347  | + | GTGACCTATGCACCAGACGTAAAGGAGAAACACACGCTCATGGACCCGAGCGGACCTGAGATCGGAAGAGCGGTTTCAG    |
| chr2  | 240003928 | 240003967 | HDAC4_10348  | + | GTGACCTATGCACCAGACGTAGGGCAACTACTTACGGCTGAGGACGGTATTGAGGGTAGATCGGAAGAGCGGTTTCAG     |
| chr2  | 240005949 | 240005988 | HDAC4_10349  | + | GTGACCTATGCACCAGACGTGAACGTGACGCTGGAGACGAAGCGCAGGTGGGGCGTGGCCAAGATCGGAAGAGCGGTTTCAG |
| chr2  | 240009321 | 240009360 | HDAC4_10350  | + | GTGACCTATGCACCAGACGTCAACAGACAGCCAGGAGAGACAAACAAAGACACACTTTGAGATCGGAAGAGCGGTTTCAG   |
| chr2  | 240011823 | 240011862 | HDAC4_10351  | + | GTGACCTATGCACCAGACGTAAACACCCACAGTGAAGTCAACCTCCAGGCCACCGTCATAGATCGGAAGAGCGGTTTCAG   |
| chr2  | 240016763 | 240016802 | HDAC4_10352  | + | GTGACCTATGCACCAGACGTGAGGGGAGACGGTCAGAGAGGCCAACGGGCACCGGCCAACGAGATCGGAAGAGCGGTTTCAG |
| chr2  | 240024603 | 240024642 | HDAC4_10353  | + | GTGACCTATGCACCAGACGTAGGGGAGAGACACTCACAGTTCGCAAGACTGCTGCTAGATCGGAAGAGCGGTTTCAG      |
| chr2  | 240029890 | 240029929 | HDAC4_10354  | + | GTGACCTATGCACCAGACGTGCAGAGGGGCCAAGATTACGCGCACATCCAGGGGCCAGCCAGATCGGAAGAGCGGTTTCAG  |
| chr2  | 240033419 | 240033458 | HDAC4_10355  | + | GTGACCTATGCACCAGACGTGAAACGGCCGTGTTGGCGGTTGCGGATGTCTCCCGCCCTAGATCGGAAGAGCGGTTTCAG   |
| chr2  | 240037017 | 240037056 | HDAC4_10356  | + | GTGACCTATGCACCAGACGTGAGGTAAACACATGAAGCACAGAGAGCTGGGTCTCTGAGCAGATCGGAAGAGCGGTTTCAG  |
| chr2  | 240048386 | 240048425 | HDAC4_10357  | + | GTGACCTATGCACCAGACGTCCAGTCTGAAGTAATTTGGAGGAAGAAACAGCAGAGGGGAAGATCGGAAGAGCGGTTTCAG  |
| chr2  | 240056150 | 240056189 | HDAC4_10358  | + | GTGACCTATGCACCAGACGTCAAGCAGGATGCTCGGGTGGAAGGACCCATCACCCACCCAGATCGGAAGAGCGGTTTCAG   |
| chr2  | 240056350 | 240056389 | HDAC4_10359  | + | GTGACCTATGCACCAGACGTAAACAGACAGTACCATCACAGTCTGTCACGGCCAAACATCAGATCGGAAGAGCGGTTTCAG  |
| chr2  | 240061503 | 240061542 | HDAC4_10360  | + | GTGACCTATGCACCAGACGTAGAATAACCTGGTGAGTGTACTCCATGCGGAGGGAGGGAGATCGGAAGAGCGGTTTCAG    |
| chr2  | 240066421 | 240066460 | HDAC4_10361  | + | GTGACCTATGCACCAGACGTAGGAGATGTCATTACAGCCAGGCAGACACCCTGGCTCAAAGATCGGAAGAGCGGTTTCAG   |
| chr2  | 240078480 | 240078519 | HDAC4_10362  | + | GTGACCTATGCACCAGACGTGGCAAAGACAGATGTTTTAGTTTACCAGCGCACTGCCCCAGATCGGAAGAGCGGTTTCAG   |
| chr2  | 240085630 | 240085669 | HDAC4_10363  | + | GTGACCTATGCACCAGACGTAGAAGCATAGCAGGGGGTGAAGTGTGGCTCTGCCCTACAAGATCGGAAGAGCGGTTTCAG   |
| chr2  | 240098270 | 240098309 | HDAC4_10364  | + | GTGACCTATGCACCAGACGTAAAGGAGGAGACAGCGTCCAGGCCAGGCTCCACACACAGATCGGAAGAGCGGTTTCAG     |
| chr2  | 240111784 | 240111823 | HDAC4_10365  | + | GTGACCTATGCACCAGACGTAAACAGCAGAGAGCCGGTCACTGCCGCCCTTTGCTTCCAGATCGGAAGAGCGGTTTCAG    |
| chr2  | 240158371 | 240158410 | HDAC4_10366  | + | GTGACCTATGCACCAGACGTGAGAAGGCACTGGCTTCAGAACTGCGCGCATTTACGCCAAGATCGGAAGAGCGGTTTCAG   |
| chr2  | 240274405 | 240274444 | HDAC4_10367  | + | GTGACCTATGCACCAGACGTGTCCACTCCTTTAAGTGATTGAAATGGCTCAAAATTTCCAGATCGGAAGAGCGGTTTCAG   |
| chr6  | 34208670  | 34208709  | HMGA1_10368  | + | GTGACCTATGCACCAGACGTGGACAGCGCTGGTAGGGAGTCAAGTGGGTGTCCAAACCTTAGATCGGAAGAGCGGTTTCAG  |
| chr6  | 34208703  | 34208742  | HMGA1_10369  | + | GTGACCTATGCACCAGACGTAAACCTTTGCTTCACTTGCTTACCTTTGGGGCTAGGGAAGATCGGAAGAGCGGTTTCAG    |
| chr6  | 34210583  | 34210622  | HMGA1_10370  | + | GTGACCTATGCACCAGACGTAGATGGACTACCCTGGGTGGATGACTAGCAGAGATCCAGATCGGAAGAGCGGTTTCAG     |
| chr6  | 34211306  | 34211345  | HMGA1_10371  | + | GTGACCTATGCACCAGACGTAAAGCAGACTGCTGCTTGCCTCTGGGCTCTTTTGGATGTAAGATCGGAAGAGCGGTTTCAG  |
| chr6  | 34212672  | 34212711  | HMGA1_10372  | + | GTGACCTATGCACCAGACGTCCGCTGCTCCTCACTGGAGGAGCAGCTTCTTCTGGGACAGATCGGAAGAGCGGTTTCAG    |
| chr2  | 176973881 | 176973920 | HOXD11_10373 | + | GTGACCTATGCACCAGACGTAAAGCGCCCTCACCCAGCCCACTCACCCACCTCCTTCCAGATCGGAAGAGCGGTTTCAG    |
| chr2  | 209101904 | 209101943 | IDH1_10374   | + | GTGACCTATGCACCAGACGTGGAIAAAAAAAAAAGAAATTTAGTTGGTCTCTGATATGGTAAGATCGGAAGAGCGGTTTCAG |
| chr2  | 209103968 | 209104007 | IDH1_10375   | + | GTGACCTATGCACCAGACGTGGAIAAAAAAAAAACCAACTCCAATCATCTAGTTATAGAGATCGGAAGAGCGGTTTCAG    |
| chr2  | 209104738 | 209104777 | IDH1_10376   | + | GTGACCTATGCACCAGACGTGGAGCATGAAGCGTTGGTGGTCCAACTGCATGAAGAGCACTAGATCGGAAGAGCGGTTTCAG |
| chr2  | 209106880 | 209106919 | IDH1_10377   | + | GTGACCTATGCACCAGACGTAAAGGTAAGAGAATAATAATAAGAAATTTGATTTTGTAGATCGGAAGAGCGGTTTCAG     |
| chr2  | 209108339 | 209108378 | IDH1_10378   | + | GTGACCTATGCACCAGACGTGAAGCCAGTGAAGGAAAAAGGGAGAAAGAAATAAATGTAAGATCGGAAGAGCGGTTTCAG   |
| chr2  | 209110159 | 209110198 | IDH1_10379   | + | GTGACCTATGCACCAGACGTGGGAAAAAGGTATAAAGAAAAAAAATACCTTAGCAGGAAGATCGGAAGAGCGGTTTCAG    |
| chr2  | 209113395 | 209113434 | IDH1_10380   | + | GTGACCTATGCACCAGACGTAAAAATTAGAAGCAAAGTTTTTCAGACAAATGGATAGTTAAGATCGGAAGAGCGGTTTCAG  |
| chr2  | 209116286 | 209116325 | IDH1_10381   | + | GTGACCTATGCACCAGACGTAAAAACCTAAAGAAAAAGAAAAATACATGCCTTGTCTATTAGATCGGAAGAGCGGTTTCAG  |
| chr15 | 99192915  | 99192954  | IGF1R_10382  | + | GTGACCTATGCACCAGACGTGCCCGCCGCCCGGGCAACTGCGGAACTTTCTCCAGAGATCGGAAGAGCGGTTTCAG       |

|       |           |           |              |   |                                                                                     |
|-------|-----------|-----------|--------------|---|-------------------------------------------------------------------------------------|
| chr15 | 99434877  | 99434916  | IGF1R_10383  | + | GTGACCTATGCACCAGACGTGCCACACGTTGGTCACTACCCGCCCCACCTCACCCGCCAAGATCGGAAGAGCGGTTTCAG    |
| chr15 | 99440145  | 99440184  | IGF1R_10384  | + | GTGACCTATGCACCAGACGTCATCCCCCTGGAAAACCGGCTAGATCTCATGGTTTTCTTTAGATCGGAAGAGCGGTTTCAG   |
| chr15 | 99442861  | 99442900  | IGF1R_10385  | + | GTGACCTATGCACCAGACGTCAAATTTTCATGAGCTGACGTTCTATTACAAAATAAGCAGCAGATCGGAAGAGCGGTTTCAG  |
| chr15 | 99452139  | 99452178  | IGF1R_10386  | + | GTGACCTATGCACCAGACGTGCATCCAAAACACCGTGGGCCCAACCATCATGATAACAGCAGATCGGAAGAGCGGTTTCAG   |
| chr15 | 99454681  | 99454720  | IGF1R_10387  | + | GTGACCTATGCACCAGACGTGCTTTGGGTGATGCCATTCTGTTGACAGGGCTACGAATTGGAGATCGGAAGAGCGGTTTCAG  |
| chr15 | 99456522  | 99456561  | IGF1R_10388  | + | GTGACCTATGCACCAGACGCTAGACAAGCCGCCACCATCCACTTCTTCGCAAGCTCAAGATCGGAAGAGCGGTTTCAG      |
| chr15 | 99459371  | 99459410  | IGF1R_10389  | + | GTGACCTATGCACCAGACGTAGCAGCGGCCCTGGACGGAGGTGTGACCGTTCATTCTCTGATAGATCGGAAGAGCGGTTTCAG |
| chr15 | 99460116  | 99460155  | IGF1R_10390  | + | GTGACCTATGCACCAGACGTCATGTGAAATTTTCAGTTGGCAAACCCTGCTCAGGCGGAGATCGGAAGAGCGGTTTCAG     |
| chr15 | 99465671  | 99465710  | IGF1R_10391  | + | GTGACCTATGCACCAGACGTATCCAGCTGGCCCCATTGCCACCTTCTCACAACCTAGTGAGATCGGAAGAGCGGTTTCAG    |
| chr15 | 99467252  | 99467291  | IGF1R_10392  | + | GTGACCTATGCACCAGACGTGGCAGTGGCCCCGTGCCTGCATGTACTTCCATCCATTGACAAGATCGGAAGAGCGGTTTCAG  |
| chr15 | 99467924  | 99467963  | IGF1R_10393  | + | GTGACCTATGCACCAGACGTTGGAGGGGAGAAGAACCGTGGTAAAACCTGAAAGCAGGGTGAGATCGGAAGAGCGGTTTCAG  |
| chr15 | 99472900  | 99472939  | IGF1R_10394  | + | GTGACCTATGCACCAGACGTGCAAAGTTTATGACACTTTCTGTGGCTGAGTGGTTTGTGATGAGATCGGAAGAGCGGTTTCAG |
| chr15 | 99473545  | 99473584  | IGF1R_10395  | + | GTGACCTATGCACCAGACGTGGGCCACCAGCACTGCCAGCGTGCAGGGCAGGTAGATCGGATCGGAAGAGCGGTTTCAG     |
| chr15 | 99478293  | 99478332  | IGF1R_10396  | + | GTGACCTATGCACCAGACGTGTTCTGAAAAGCCAAAATGCAGCACAGGGAGAGGGTATCAGATCGGAAGAGCGGTTTCAG    |
| chr15 | 99478666  | 99478705  | IGF1R_10397  | + | GTGACCTATGCACCAGACGTATTTCCACCGGTATTGCATGTTGCCTGGCCTGCTCTCTTTAGATCGGAAGAGCGGTTTCAG   |
| chr15 | 99482600  | 99482639  | IGF1R_10398  | + | GTGACCTATGCACCAGACGTAGCTTTCCAGGTCTGGGCAAGAACATAAATCAGGTGTTTTAGATCGGAAGAGCGGTTTCAG   |
| chr15 | 99486292  | 99486331  | IGF1R_10399  | + | GTGACCTATGCACCAGACGCTTTACTGTCATTGGCAGCCTGGAGCCCCAGCCTCGCACAGATCGGAAGAGCGGTTTCAG     |
| chr15 | 99491948  | 99491987  | IGF1R_10400  | + | GTGACCTATGCACCAGACGTCTTGGGCCCTCCGTGCTCTTCTGAGTTCTTCTCAAATAAGATCGGAAGAGCGGTTTCAG     |
| chr15 | 99500682  | 99500721  | IGF1R_10401  | + | GTGACCTATGCACCAGACGCTGAATCTGTGCAAACAGTAACGTGTGCGCACGCGCAGCGAGATCGGAAGAGCGGTTTCAG    |
| chr15 | 99251074  | 99251113  | IGF1R_10402  | + | GTGACCTATGCACCAGACGTGGATATTGGGCTTTACAACCTGAGGAACATTACTCGGGGGAGATCGGAAGAGCGGTTTCAG   |
| chr7  | 45954555  | 45954594  | IGFBP3_10403 | + | GTGACCTATGCACCAGACGTGAAAACAGAGACAGAGAAGTGAATGCTCCTGGGTCTGGTGAGATCGGAAGAGCGGTTTCAG   |
| chr7  | 45956277  | 45956316  | IGFBP3_10404 | + | GTGACCTATGCACCAGACGTGGAAGGACCAGAGCAACAGATCACAGTTTTTACTCTAGAAGATCGGAAGAGCGGTTTCAG    |
| chr7  | 45957049  | 45957088  | IGFBP3_10405 | + | GTGACCTATGCACCAGACGTCCAAGAGAGACAACACATGAGAGTCAATATCTATCAAGATCGGAAGAGCGGTTTCAG       |
| chr7  | 45960750  | 45960789  | IGFBP3_10406 | + | GTGACCTATGCACCAGACGTTACCAGGACCGTCTGCTTGGCAGTGGCCGCGCAGGATGAGATCGGAAGAGCGGTTTCAG     |
| chr3  | 123946922 | 123946961 | KALRN_10407  | + | GTGACCTATGCACCAGACGTGGGACTTTCTTTGTAAGGACCTAGAGAAGTTGTGTGAGATCGGAAGAGCGGTTTCAG       |
| chr3  | 123953801 | 123953840 | KALRN_10408  | + | GTGACCTATGCACCAGACGTGGGGAATGGCCTGCAGGGGAGCGGGAGGGAGCTGGGCTGAGATCGGAAGAGCGGTTTCAG    |
| chr3  | 123983548 | 123983587 | KALRN_10409  | + | GTGACCTATGCACCAGACGTTTTCTCTCTTAGCATCTTCTTTCCCTTCCCCTTCTGCCAGATCGGAAGAGCGGTTTCAG     |
| chr3  | 123988113 | 123988152 | KALRN_10410  | + | GTGACCTATGCACCAGACGTAACAGGCCAAACCTGAGCCGGGATGGGGGTGAGGGAGCAGAGATCGGAAGAGCGGTTTCAG   |
| chr3  | 124017771 | 124017810 | KALRN_10411  | + | GTGACCTATGCACCAGACGTGGGCTGTTCTCAGCAGCTGCCCTGGGAGTGGGAGATCGGAAGAGCGGTTTCAG           |
| chr3  | 124045029 | 124045068 | KALRN_10412  | + | GTGACCTATGCACCAGACGTGAAAACCTGCAGCAGCTGCTGTTGGTAGAAGGGTTGGCAAGATCGGAAGAGCGGTTTCAG    |
| chr3  | 124048850 | 124048889 | KALRN_10413  | + | GTGACCTATGCACCAGACGTAGCAGGGCAACCATGGTCTTGGGCATGTCTGCATGTGGGAGATCGGAAGAGCGGTTTCAG    |
| chr3  | 124053353 | 124053392 | KALRN_10414  | + | GTGACCTATGCACCAGACGTCAGACCCCGTGTCCATTATCCATTCTAGGAGGCAGACCAGATCGGAAGAGCGGTTTCAG     |
| chr3  | 124103894 | 124103933 | KALRN_10415  | + | GTGACCTATGCACCAGACGTCAGTGAGAGAGGGGACTTCTGTCCTGCCAGGGTCAGGTCAGATCGGAAGAGCGGTTTCAG    |
| chr3  | 124117729 | 124117768 | KALRN_10416  | + | GTGACCTATGCACCAGACGTCGACAGGAGGGAGGTGGAGAGGGGCCAAGAAGTCTCTTAGATCGGAAGAGCGGTTTCAG     |
| chr3  | 124132523 | 124132562 | KALRN_10417  | + | GTGACCTATGCACCAGACGTTCCGCTCATTCTCTGGCAGTGGGAGGATGATGAAAACAAGCAAGATCGGAAGAGCGGTTTCAG |
| chr3  | 124141836 | 124141875 | KALRN_10418  | + | GTGACCTATGCACCAGACGTCCTTTCTTCTCAGCCTGGGTTTCTCAGCCAGCTGAGCCAGATCGGAAGAGCGGTTTCAG     |
| chr3  | 124149633 | 124149672 | KALRN_10419  | + | GTGACCTATGCACCAGACGTAATCTGGCTGCACTGCCTCCCTTCCCTTTCTGCTCTGTAGATCGGAAGAGCGGTTTCAG     |
| chr3  | 124153383 | 124153422 | KALRN_10420  | + | GTGACCTATGCACCAGACGTAGACTGTGGGGCTTGTGGGGCTGAGATTGCCAGGGGGCCAAGATCGGAAGAGCGGTTTCAG   |
| chr3  | 124157895 | 124157934 | KALRN_10421  | + | GTGACCTATGCACCAGACGTATTGTCATCGAAGGGCTCAGACTCCTGGCCTTGGCCGCTAGATCGGAAGAGCGGTTTCAG    |
| chr3  | 124160917 | 124160956 | KALRN_10422  | + | GTGACCTATGCACCAGACGTCACCTGCCAGCCACCACTTCAAGCAGACACCCCTCCAGATCGGAAGAGCGGTTTCAG       |
| chr3  | 124165134 | 124165173 | KALRN_10423  | + | GTGACCTATGCACCAGACGTCCTTTCCCTGGCAGCTATCTCAGTTCTGGGGAGCATAAGAAAGATCGGAAGAGCGGTTTCAG  |
| chr3  | 124165743 | 124165782 | KALRN_10424  | + | GTGACCTATGCACCAGACGTTCCAGAGCCTCCCCAGATCCACCAGAAGCTCCATTAGATCGGAAGAGCGGTTTCAG        |
| chr3  | 124174217 | 124174256 | KALRN_10425  | + | GTGACCTATGCACCAGACGTTGATGTCCTCTGGGACATCCCTTCTCATCTCCCTGAAGATCGGAAGAGCGGTTTCAG       |
| chr3  | 124175586 | 124175625 | KALRN_10426  | + | GTGACCTATGCACCAGACGTCCTCCGCCAGCTAGCTGGCTCCCGTGACTATGCTGGGAGATCGGAAGAGCGGTTTCAG      |
| chr3  | 124180814 | 124180853 | KALRN_10427  | + | GTGACCTATGCACCAGACGTCAGTAATCCGTTACAGCTATATGGAAAATGACATCCTAGATCGGAAGAGCGGTTTCAG      |
| chr3  | 124181491 | 124181530 | KALRN_10428  | + | GTGACCTATGCACCAGACGTGGAGGGTCTCAGAGGTGCAGCACTTAGGCCGTAAAACAGCAGATCGGAAGAGCGGTTTCAG   |
| chr3  | 124193590 | 124193629 | KALRN_10429  | + | GTGACCTATGCACCAGACGTTGAAATCCTTCTCCACTGCCATAACAGCTGGCAGCACTCAGATCGGAAGAGCGGTTTCAG    |
| chr3  | 124196192 | 124196231 | KALRN_10430  | + | GTGACCTATGCACCAGACGTTTTTCCATTCTTGGCAGCTGATGAGCAGGTGAAATGCTAGATCGGAAGAGCGGTTTCAG     |
| chr3  | 124201758 | 124201797 | KALRN_10431  | + | GTGACCTATGCACCAGACGTTCCCTCTCATCTCCCTCCACTGCCTACTGCCTGGGGCAAGATCGGAAGAGCGGTTTCAG     |
| chr3  | 124207173 | 124207212 | KALRN_10432  | + | GTGACCTATGCACCAGACGTTCCAGCACTGGGGAAGCCTCCTCTCTTCTTGGACAGGGAGATCGGAAGAGCGGTTTCAG     |
| chr3  | 124209742 | 124209781 | KALRN_10433  | + | GTGACCTATGCACCAGACGTCAGTGGGTGAGCAAGCAACTCCCTGCTTTCATAGAACCAGATCGGAAGAGCGGTTTCAG     |
| chr3  | 124210282 | 124210321 | KALRN_10434  | + | GTGACCTATGCACCAGACGTCCTCTGCTAGGCCACAAACTAGGGTTGGGATAATAGAAAGATCGGAAGAGCGGTTTCAG     |
| chr3  | 124211740 | 124211779 | KALRN_10435  | + | GTGACCTATGCACCAGACGTCCTCTCCCTCCAGCACTGCCTGCCTCACAGGCTTCCGGGTAGATCGGAAGAGCGGTTTCAG   |
| chr3  | 124215271 | 124215310 | KALRN_10436  | + | GTGACCTATGCACCAGACGTGTCCTAACCTTCCCTCCCTGAGACTTCTTGATGGCTCAAAGATCGGAAGAGCGGTTTCAG    |
| chr3  | 124237320 | 124237359 | KALRN_10437  | + | GTGACCTATGCACCAGACGTGGGACTTGTCCCTGCAGCTACCAGGGTATGCCGTGGCACCAGATCGGAAGAGCGGTTTCAG   |
| chr3  | 124303764 | 124303803 | KALRN_10438  | + | GTGACCTATGCACCAGACGTTGGCGGGCTGGTGGCTTCTGTTAGCCAGACTGTCGCAGATCGGAAGAGCGGTTTCAG       |
| chr3  | 124351561 | 124351600 | KALRN_10439  | + | GTGACCTATGCACCAGACGTTGGGCTGGAGTTGCCATCAGAGGGCTTCTGACATGAGATCGGAAGAGCGGTTTCAG        |
| chr3  | 124352811 | 124352850 | KALRN_10440  | + | GTGACCTATGCACCAGACGTTTTACTTCTCACTTAAAAGAGCAACGTGCCGTGCATGATCGGAAGAGCGGTTTCAG        |

|       |           |           |             |   |                                                                                     |
|-------|-----------|-----------|-------------|---|-------------------------------------------------------------------------------------|
| chr3  | 124356161 | 124356200 | KALRN_10441 | + | GTGACCTATGCACCAGACGTGTCCTGGAGGCAGTTCGTGTGTGTCTCACCTTCACTGAGATCGGAAGAGCGGTTTCAG      |
| chr3  | 124369796 | 124369835 | KALRN_10442 | + | GTGACCTATGCACCAGACGTTCCCCAGTTCCTCCCTGTGGTGCACATGTGAGTGGCGGTGGAGATCGGAAGAGCGGTTTCAG  |
| chr3  | 124374525 | 124374564 | KALRN_10443 | + | GTGACCTATGCACCAGACGTGGTTCCAGGTGGGTCTGTGGTACCCCAACCAGGAGCACGTAGATCGGAAGAGCGGTTTCAG   |
| chr3  | 124376409 | 124376448 | KALRN_10444 | + | GTGACCTATGCACCAGACGTATGCTGCCCGGAGGATCCAGTGTCTGGGAATCCAGGACTAGATCGGAAGAGCGGTTTCAG    |
| chr3  | 124376661 | 124376700 | KALRN_10445 | + | GTGACCTATGCACCAGACGTCCTCATACCTCCTCCCAAACCTCCTTACTAGGCTCATTAAAGATCGGAAGAGCGGTTTCAG   |
| chr3  | 124377375 | 124377414 | KALRN_10446 | + | GTGACCTATGCACCAGACGTCAGGCTTTTGCTGAECTGGGTGGGGAGGAAAACCTCAGGCCAAGATCGGAAGAGCGGTTTCAG |
| chr3  | 124378315 | 124378354 | KALRN_10447 | + | GTGACCTATGCACCAGACGTGGGAGCTGGGTGAGGGTGGAGAAGGATCCATCAGGCTCAGATCGGAAGAGCGGTTTCAG     |
| chr3  | 124379831 | 124379870 | KALRN_10448 | + | GTGACCTATGCACCAGACGTTGCTTGTAAATGCTTGTCTTCTTAGGGACCATATTGGATAAGATCGGAAGAGCGGTTTCAG   |
| chr3  | 124380786 | 124380825 | KALRN_10449 | + | GTGACCTATGCACCAGACGTAAGATGCGTCTAAGCCCCTCTCTCCAGGACAATAGGAGAGATCGGAAGAGCGGTTTCAG     |
| chr3  | 124385492 | 124385531 | KALRN_10450 | + | GTGACCTATGCACCAGACGTCATGTTGATGAGAAAGAGGCAAGGAAGAGCCAGTCTTGAGATCGGAAGAGCGGTTTCAG     |
| chr3  | 124386041 | 124386080 | KALRN_10451 | + | GTGACCTATGCACCAGACGTGGCTTGGTTCCTTGCAGGGCTGTGTGAGGGGACTCCACGAAGATCGGAAGAGCGGTTTCAG   |
| chr3  | 124390756 | 124390795 | KALRN_10452 | + | GTGACCTATGCACCAGACGTAATCATTACTCCCACCTTGTACTACGATGGCATAGCCTAGATCGGAAGAGCGGTTTCAG     |
| chr3  | 124393472 | 124393511 | KALRN_10453 | + | GTGACCTATGCACCAGACGTCGTTGGCTTCCCGGGAGAGGAGTATGAGGATTAATAAAGATCGGAAGAGCGGTTTCAG      |
| chr3  | 124397171 | 124397210 | KALRN_10454 | + | GTGACCTATGCACCAGACGTTATTCCGGAGCTGCGTCCCCACCTGTCATCCACTCCCACCAGATCGGAAGAGCGGTTTCAG   |
| chr3  | 124398375 | 124398414 | KALRN_10455 | + | GTGACCTATGCACCAGACGTCATTGTTGCTCTATTTCCTACAATGATTGCCTTTTTTGAAGATCGGAAGAGCGGTTTCAG    |
| chr3  | 124412689 | 124412728 | KALRN_10456 | + | GTGACCTATGCACCAGACGTAAGCATTAGAATTGGAAACATCGGGGATGGTTAAATAAATAGATCGGAAGAGCGGTTTCAG   |
| chr3  | 124413361 | 124413400 | KALRN_10457 | + | GTGACCTATGCACCAGACGTTGCCCTAACATCAGCAACAGCAGCCCTTGTGACACAGAGATCGGAAGAGCGGTTTCAG      |
| chr3  | 124416582 | 124416621 | KALRN_10458 | + | GTGACCTATGCACCAGACGTCCTGCTCTTCTTTTTCTTTTTCTTTTTAAACATTTAGATCGGAAGAGCGGTTTCAG        |
| chr3  | 124418891 | 124418930 | KALRN_10459 | + | GTGACCTATGCACCAGACGTGCCAGCCCTGGCCCCCAGGCAGTGGGATTGAGGCACCTAGATCGGAAGAGCGGTTTCAG     |
| chr3  | 124420974 | 124421013 | KALRN_10460 | + | GTGACCTATGCACCAGACGTAGTTTTATATCTTTCATTTCATGAACACCTAGCAACATCAAGATCGGAAGAGCGGTTTCAG   |
| chr3  | 124431993 | 124432032 | KALRN_10461 | + | GTGACCTATGCACCAGACGTACGCCATCTCTCTAAAGTCGCCTGCATCCATTAGGTTAGAGATCGGAAGAGCGGTTTCAG    |
| chr3  | 124438328 | 124438367 | KALRN_10462 | + | GTGACCTATGCACCAGACGTGCCCTATGGTTTCACATAGACGTGCAGTGTGAACCAAGAGATCGGAAGAGCGGTTTCAG     |
| chr3  | 123987856 | 123987895 | KALRN_10463 | + | GTGACCTATGCACCAGACGTGGCCCTGTGGAGGAGCTGGCCGGGAGGGGCAGCGGCTGAGATCGGAAGAGCGGTTTCAG     |
| chr3  | 124438055 | 124438094 | KALRN_10464 | + | GTGACCTATGCACCAGACGTCCTTCCATCTTCTGTGGTGTGAGCAATGCTGCCAGAGAAGATCGGAAGAGCGGTTTCAG     |
| chr3  | 20082283  | 20082322  | KAT2B_10465 | + | GTGACCTATGCACCAGACGTGCCGCTCTCGGACCGCGGATGGGTGCTAGGGGCCAGCCAGATCGGAAGAGCGGTTTCAG     |
| chr3  | 20113962  | 20114001  | KAT2B_10466 | + | GTGACCTATGCACCAGACGTAATCTTCAAGGAAAGTATAACGAGTTCATTGTAGCGTGAAGATCGGAAGAGCGGTTTCAG    |
| chr3  | 20136911  | 20136950  | KAT2B_10467 | + | GTGACCTATGCACCAGACGTAACATTTTAAACATTTTCTCTCATTATTCAAATGTACCAGATCGGAAGAGCGGTTTCAG     |
| chr3  | 20142971  | 20143010  | KAT2B_10468 | + | GTGACCTATGCACCAGACGTGAACGTTCTTTTCTTTGGCCCCATAAAGCCTGTTACAGAAGATCGGAAGAGCGGTTTCAG    |
| chr3  | 20153290  | 20153329  | KAT2B_10469 | + | GTGACCTATGCACCAGACGTTTGTGCTGGTCTTTGTTTATGCCAGAGCTTGGGTTGAGATCGGAAGAGCGGTTTCAG       |
| chr3  | 20156491  | 20156530  | KAT2B_10470 | + | GTGACCTATGCACCAGACGTTTTTACATGATCAGAAACACCAAGCAGGCAACCTGAAGATCGGAAGAGCGGTTTCAG       |
| chr3  | 20161226  | 20161265  | KAT2B_10471 | + | GTGACCTATGCACCAGACGTAAGAGGGGATAAGAGAGGGCTGTGACTTGTCTCCAGGAGCTAGATCGGAAGAGCGGTTTCAG  |
| chr3  | 20164307  | 20164346  | KAT2B_10472 | + | GTGACCTATGCACCAGACGTTAAACCTGGGCAGCCAGCTGGTAGACCTCTTCTGCTCTCCAGATCGGAAGAGCGGTTTCAG   |
| chr3  | 20167616  | 20167655  | KAT2B_10473 | + | GTGACCTATGCACCAGACGTCCTTCTGTTCTTCTTCTTCTTCTTAAATGAAAGAGATCGGAAGAGCGGTTTCAG          |
| chr3  | 20169052  | 20169091  | KAT2B_10474 | + | GTGACCTATGCACCAGACGTACCAAGCTCTTAGAAGAAGCAGAATGTGGGCTTCTCAGATCGGAAGAGCGGTTTCAG       |
| chr3  | 20178555  | 20178594  | KAT2B_10475 | + | GTGACCTATGCACCAGACGTCACCAACGCAACACTGTTTTGTACTCCTTTTTCTTAATAGATCGGAAGAGCGGTTTCAG     |
| chr3  | 20181867  | 20181906  | KAT2B_10476 | + | GTGACCTATGCACCAGACGTGGTTGACTCCCTTACTTCTGTACAGGCCAGTCTTAGCTGAGATCGGAAGAGCGGTTTCAG    |
| chr3  | 20187933  | 20187972  | KAT2B_10477 | + | GTGACCTATGCACCAGACGTACCTTCTTTTAAAGCGAAATTTTTAGTAATGCCGTGGTAGATCGGAAGAGCGGTTTCAG     |
| chr3  | 20189502  | 20189541  | KAT2B_10478 | + | GTGACCTATGCACCAGACGTCGGGCAGAGGATGTTAATGGAAGTGATTTTTTTTTTCCAGATCGGAAGAGCGGTTTCAG     |
| chr3  | 20189809  | 20189848  | KAT2B_10479 | + | GTGACCTATGCACCAGACGTTCTTTTACCTCATGCAAAATTTTTGAAATGATTTCCAGATCGGAAGAGCGGTTTCAG       |
| chr3  | 20189990  | 20190029  | KAT2B_10480 | + | GTGACCTATGCACCAGACGTTAACATTTTCAATAGATGATTTAAACTCTGGATGGCGGAGATCGGAAGAGCGGTTTCAG     |
| chr3  | 20194028  | 20194067  | KAT2B_10481 | + | GTGACCTATGCACCAGACGTCCTCTGCTTCTTAGAAAACCTCAACAGCAGTGTGCCTAAAGAGATCGGAAGAGCGGTTTCAG  |
| chr18 | 6942249   | 6942288   | LAMA1_10482 | + | GTGACCTATGCACCAGACGTAAGAAGAGAAGACAATCTTGCTTAATTTTTGTTGAAATGCAGATCGGAAGAGCGGTTTCAG   |
| chr18 | 6943412   | 6943451   | LAMA1_10483 | + | GTGACCTATGCACCAGACGTATATCTTGGTGAGTTTTTGTGATTTAAGGAACACAGTCCAGATCGGAAGAGCGGTTTCAG    |
| chr18 | 6947306   | 6947345   | LAMA1_10484 | + | GTGACCTATGCACCAGACGTCGAAGGAGGACCAAGTCAGGGTGTAGCGCTGCCAGGCCAGAGATCGGAAGAGCGGTTTCAG   |
| chr18 | 6948566   | 6948605   | LAMA1_10485 | + | GTGACCTATGCACCAGACGTTGACATGCAAGATGAGACGTTGGTATTCTAATGGGAAGGAGATCGGAAGAGCGGTTTCAG    |
| chr18 | 6949269   | 6949308   | LAMA1_10486 | + | GTGACCTATGCACCAGACGTGTGAAAACATGCAATTTTTTGAGGAATCGAAAAAATAGATCGGAAGAGCGGTTTCAG       |
| chr18 | 6950981   | 6951020   | LAMA1_10487 | + | GTGACCTATGCACCAGACGTCGAAGTGTCTAGCGTTGAGAAAAGAACTTTTACTTTTTCATAGATCGGAAGAGCGGTTTCAG  |
| chr18 | 6955475   | 6955514   | LAMA1_10488 | + | GTGACCTATGCACCAGACGTCACACAGGGACTCAGCCGCCACCCGAGCCCAACCCAGATCGGAAGAGCGGTTTCAG        |
| chr18 | 6956775   | 6956814   | LAMA1_10489 | + | GTGACCTATGCACCAGACGTACAAGAGAGTGTTTTTCAAAATTAGGATATCACAACACAGTATCGGAAGAGCGGTTTCAG    |
| chr18 | 6958672   | 6958711   | LAMA1_10490 | + | GTGACCTATGCACCAGACGTAATGGAGAAAATAAATGAAAAGCTTAAACATAATGAAATAGATCGGAAGAGCGGTTTCAG    |
| chr18 | 6959502   | 6959541   | LAMA1_10491 | + | GTGACCTATGCACCAGACGTTGCATAGAGAAATTTCCAGACAAAACATTAATATGAGATCGGAAGAGCGGTTTCAG        |
| chr18 | 6961769   | 6961808   | LAMA1_10492 | + | GTGACCTATGCACCAGACGTTGGATGGAACAGCATGGTGAGTTCCTAGCTGCGGCCAAAGATCGGAAGAGCGGTTTCAG     |
| chr18 | 6962069   | 6962108   | LAMA1_10493 | + | GTGACCTATGCACCAGACGTGGGCATGAGAACAATCACAAAATTTGGGTTTTTAAATTCAGATCGGAAGAGCGGTTTCAG    |
| chr18 | 6964813   | 6964852   | LAMA1_10494 | + | GTGACCTATGCACCAGACGTAGCACAGGCAAGAGATAAGAAAAGGAAAATCCCTTTCCATAGATCGGAAGAGCGGTTTCAG   |
| chr18 | 6965442   | 6965481   | LAMA1_10495 | + | GTGACCTATGCACCAGACGTGAGAACACAGTCCCCAGGTTATAGCTTTATCCAGGTTTAGATCGGAAGAGCGGTTTCAG     |
| chr18 | 6966307   | 6966346   | LAMA1_10496 | + | GTGACCTATGCACCAGACGTTGAAGAGATGAAATGAAATCCTTCTCAGGAGGGTAGAAAAGATCGGAAGAGCGGTTTCAG    |
| chr18 | 6971991   | 6972030   | LAMA1_10497 | + | GTGACCTATGCACCAGACGTTCAAGCAAAACAATAAATATAAGCTGACCAAGCAAGATCGGAAGAGCGGTTTCAG         |
| chr18 | 6973217   | 6973256   | LAMA1_10498 | + | GTGACCTATGCACCAGACGTCAAAGAAATGCAAAAATAAATTTTTCAGAAATTTCCAGTACAGATCGGAAGAGCGGTTTCAG  |

|       |           |           |             |   |                                                                                        |
|-------|-----------|-----------|-------------|---|----------------------------------------------------------------------------------------|
| chr18 | 6975046   | 6975085   | LAMA1_10499 | + | GTGACCTATGCACCAGACGTAGGAATGAACGGGGATCAGTTTACACACTGGACTGTTTGCAGATCGGAAGAGCGGTTTCAG      |
| chr18 | 6976090   | 6976129   | LAMA1_10500 | + | GTGACCTATGCACCAGACGTAAAATGAAAGTGTCCCATCATTTAGTGACACACACCGGCAGATCGGAAGAGCGGTTTCAG       |
| chr18 | 6977891   | 6977930   | LAMA1_10501 | + | GTGACCTATGCACCAGACGTCAAGAAGGCAAGGGGTGGCAAGAAAGTTGGGGAGAGGAAAGATCGGAAGAGCGGTTTCAG       |
| chr18 | 6978388   | 6978427   | LAMA1_10502 | + | GTGACCTATGCACCAGACGTTGTATATAAAAGCATGCACCTTCTGGTGCTTACACACAGAGAGATCGGAAGAGCGGTTTCAG     |
| chr18 | 6980647   | 6980686   | LAMA1_10503 | + | GTGACCTATGCACCAGACGTGGAGAAAAATGTTTCCTTTTTCAGGTTAGCCTACAAAAAAGTAGATCGGAAGAGCGGTTTCAG    |
| chr18 | 6982600   | 6982639   | LAMA1_10504 | + | GTGACCTATGCACCAGACGTGAACCATTTAAGCGTGGTGAGAGCAGGGCAGGGTGGAGTCAGATCGGAAGAGCGGTTTCAG      |
| chr18 | 6983244   | 6983283   | LAMA1_10505 | + | GTGACCTATGCACCAGACGTGACCATTTTAGATACGTTTGTAGTAACTAAATCAAACCTTAACTGAGATCGGAAGAGCGGTTTCAG |
| chr18 | 6985410   | 6985449   | LAMA1_10506 | + | GTGACCTATGCACCAGACGTAAATTAATATTGTAATATATGCACATCTACTTAATAACAAGATCGGAAGAGCGGTTTCAG       |
| chr18 | 6985653   | 6985692   | LAMA1_10507 | + | GTGACCTATGCACCAGACGTAAACGGCATTTAAAGGGTCTTCATAAAAGCAACCCTGCTTAGATCGGAAGAGCGGTTTCAG      |
| chr18 | 6986357   | 6986396   | LAMA1_10508 | + | GTGACCTATGCACCAGACGTTGAATGGTTCACATAGTAAAGTAAATGAACAACAAAGCTCCAGATCGGAAGAGCGGTTTCAG     |
| chr18 | 6992730   | 6992769   | LAMA1_10509 | + | GTGACCTATGCACCAGACGTAATTCATCAATTATTTAATAAGCCTCTCAAAGTGGCTAGAGATCGGAAGAGCGGTTTCAG       |
| chr18 | 6993762   | 6993801   | LAMA1_10510 | + | GTGACCTATGCACCAGACGTAATAAGTCTCAGGCTTAGTTGACTTTAAGTAATTAGTTTAGATCGGAAGAGCGGTTTCAG       |
| chr18 | 6995456   | 6995495   | LAMA1_10511 | + | GTGACCTATGCACCAGACGTTGGAGGAAACAAATTACAGATGCTCGAAGTAAATGTTCTAGATCGGAAGAGCGGTTTCAG       |
| chr18 | 6997894   | 6997933   | LAMA1_10512 | + | GTGACCTATGCACCAGACGTAATTTTTAAAAGGAGAGTTAAAGTTAATGCGATGTGGTCAGATCGGAAGAGCGGTTTCAG       |
| chr18 | 6999648   | 6999687   | LAMA1_10513 | + | GTGACCTATGCACCAGACGTGAAGGGACATAGGTGCAGACAGGATGGTCAATACCAGCTTAGATCGGAAGAGCGGTTTCAG      |
| chr18 | 7000007   | 7000046   | LAMA1_10514 | + | GTGACCTATGCACCAGACGTAGAAATTTCTTTTTGAATTTTCAGATATACAATTTCCATCTAGATCGGAAGAGCGGTTTCAG     |
| chr18 | 7002395   | 7002434   | LAMA1_10515 | + | GTGACCTATGCACCAGACGTACATTTAAAGGAAGGGGGAAAAAATGGGAAATTTGTTAGAAAGATCGGAAGAGCGGTTTCAG     |
| chr18 | 7008617   | 7008657   | LAMA1_10516 | + | GTGACCTATGCACCAGACGTTACATGTTAAGAGAGGAAACGCTAACATTTGAAAAACTTTAGATCGGAAGAGCGGTTTCAG      |
| chr18 | 7009376   | 7009415   | LAMA1_10517 | + | GTGACCTATGCACCAGACGTAGAACAACATTCAATTAAGCTCAGACGGCCAAATTTCTGACAAGATCGGAAGAGCGGTTTCAG    |
| chr18 | 7010395   | 7010434   | LAMA1_10518 | + | GTGACCTATGCACCAGACGTATAAAGTGTGGTTTACTTCTCTGACAAAGCTTTTCAATCAAAGATCGGAAGAGCGGTTTCAG     |
| chr18 | 7011489   | 7011528   | LAMA1_10519 | + | GTGACCTATGCACCAGACGTAAAGGAGGGGAAAGTGCACCTCAAATGCGAAGCTTTCCACAGATCGGAAGAGCGGTTTCAG      |
| chr18 | 7012148   | 7012187   | LAMA1_10520 | + | GTGACCTATGCACCAGACGTGCAATAAAGGACTCGTTTTTGCTTAAAAAGAGATGTGAAGATCGGAAGAGCGGTTTCAG        |
| chr18 | 7014061   | 7014100   | LAMA1_10521 | + | GTGACCTATGCACCAGACGTGGAAAACCAACTCAATTAATAAGGCAGATTTGATGCTTCCAGATCGGAAGAGCGGTTTCAG      |
| chr18 | 7015868   | 7015907   | LAMA1_10522 | + | GTGACCTATGCACCAGACGTGAAATGCTGGTTGACATGCTGGTGATGTCATTAAAGAGATCGGAAGAGCGGTTTCAG          |
| chr18 | 7016681   | 7016720   | LAMA1_10523 | + | GTGACCTATGCACCAGACGTAAAGGGGAGAAAAGTGGAAAACCAACATACGTTTTAATAAAAGATCGGAAGAGCGGTTTCAG     |
| chr18 | 7017394   | 7017433   | LAMA1_10524 | + | GTGACCTATGCACCAGACGTGCACACAAGACATATTAACCTCCTACTTCTGAGGATGGTTAGATCGGAAGAGCGGTTTCAG      |
| chr18 | 7023385   | 7023424   | LAMA1_10525 | + | GTGACCTATGCACCAGACGTGATTGAAAGTGGGATCAGACAAATGCAGTTACTTAAGGCCAGATCGGAAGAGCGGTTTCAG      |
| chr18 | 7024476   | 7024515   | LAMA1_10526 | + | GTGACCTATGCACCAGACGTATTAGAAATGAACAAATTTTCCAATGGATGAAGCCGAATAGATCGGAAGAGCGGTTTCAG       |
| chr18 | 7026116   | 7026155   | LAMA1_10527 | + | GTGACCTATGCACCAGACGTGCACCAGAGAATCAGCTAGGTTGCTTAAAGGATTTTCAGATCGGAAGAGCGGTTTCAG         |
| chr18 | 7032186   | 7032225   | LAMA1_10528 | + | GTGACCTATGCACCAGACGTAGGAAAGTCAATCCTCTTTTCCACTACGTTACAAACAGAAAAGATCGGAAGAGCGGTTTCAG     |
| chr18 | 7033105   | 7033144   | LAMA1_10529 | + | GTGACCTATGCACCAGACGTACAGATTGTTATGTGACTCACACGCTCGCAAATACATCTCAGATCGGAAGAGCGGTTTCAG      |
| chr18 | 7036098   | 7036137   | LAMA1_10530 | + | GTGACCTATGCACCAGACGTTAAGCGAGAATGAACACGAAAGGGGAAAGACAATCACAGCAAGATCGGAAGAGCGGTTTCAG     |
| chr18 | 7037761   | 7037800   | LAMA1_10531 | + | GTGACCTATGCACCAGACGTAATTCAGAATTTTGAAGTATGAAATAGAATTTACCTTAGAGATCGGAAGAGCGGTTTCAG       |
| chr18 | 7038960   | 7038999   | LAMA1_10532 | + | GTGACCTATGCACCAGACGTGGGTAAGATAGCTTTTTGAAACCAATGTGCTGTCCAGATCGGAAGAGCGGTTTCAG           |
| chr18 | 7040246   | 7040285   | LAMA1_10533 | + | GTGACCTATGCACCAGACGTAAACATGAACATGACCCAAAGTGAAGGCAAAAGAGGTTAAGATCGGAAGAGCGGTTTCAG       |
| chr18 | 7042260   | 7042299   | LAMA1_10534 | + | GTGACCTATGCACCAGACGTGAGGTTGCCCTGGATTCTCTTACTAGAAAATAACAGCAATGAGATCGGAAGAGCGGTTTCAG     |
| chr18 | 7043415   | 7043454   | LAMA1_10535 | + | GTGACCTATGCACCAGACGTATTTTTAACATCTCAATTAATTTACATAGCATGCCTTATAAGATCGGAAGAGCGGTTTCAG      |
| chr18 | 7044849   | 7044888   | LAMA1_10536 | + | GTGACCTATGCACCAGACGTAGGAAGCCAAACGTAATTAGAAAATGTATCTGCTTATGTAGATCGGAAGAGCGGTTTCAG       |
| chr18 | 7046377   | 7046416   | LAMA1_10537 | + | GTGACCTATGCACCAGACGTAGAAAGTTATGAACAAAAATTAACCTAGATTTTCAAGATCGGAAGAGCGGTTTCAG           |
| chr18 | 7080097   | 7080136   | LAMA1_10538 | + | GTGACCTATGCACCAGACGTAATAAAAAACATGAATTCCTCTGGCTGTTGCTTTAAAAGATCGGAAGAGCGGTTTCAG         |
| chr18 | 7080467   | 7080506   | LAMA1_10539 | + | GTGACCTATGCACCAGACGTAAATTTACCAATCAGTGCACCCTTGAATCCAAAGAAAAGATCGGAAGAGCGGTTTCAG         |
| chr18 | 7117730   | 7117769   | LAMA1_10540 | + | GTGACCTATGCACCAGACGTCCGCCACTCGGTGGGTTCTGGGGAGAAAGCCGCGCCCGCAGATCGGAAGAGCGGTTTCAG       |
| chr13 | 113951821 | 113951860 | LAMP1_10541 | + | GTGACCTATGCACCAGACGTGAGGGCGGGCCCTGGGAGCGCGGGACCGGGCGAGCCGAAGATCGGAAGAGCGGTTTCAG        |
| chr13 | 113960932 | 113960971 | LAMP1_10542 | + | GTGACCTATGCACCAGACGTCCAGGGCACTTCATGCTTCCCTTGTGTGTGGAAAAGATGAGATCGGAAGAGCGGTTTCAG       |
| chr13 | 113964188 | 113964227 | LAMP1_10543 | + | GTGACCTATGCACCAGACGTAATGGGGCCGATATGAAGTGATGAAAATGGGTTGGAGAGATCGGAAGAGCGGTTTCAG         |
| chr13 | 113965193 | 113965232 | LAMP1_10544 | + | GTGACCTATGCACCAGACGTGACCTTGGCCCTTGGGCTGTGGTGATGGTTGGGTAGCTGGGAGATCGGAAGAGCGGTTTCAG     |
| chr13 | 113973982 | 113974021 | LAMP1_10545 | + | GTGACCTATGCACCAGACGTGGCCCTCACCTGGGAGAGGGGACCGCACCGTAGGGCTGGAAGATCGGAAGAGCGGTTTCAG      |
| chr13 | 113974796 | 113974835 | LAMP1_10546 | + | GTGACCTATGCACCAGACGTGGCGGCACCTCTCTGGGGGCGCCACTGTGCTCCACCACAGATCGGAAGAGCGGTTTCAG        |
| chr13 | 113976053 | 113976092 | LAMP1_10547 | + | GTGACCTATGCACCAGACGTCCGAGGGCAGCTGTCGCGGGGTGTGGAGGAGCTGCTTCAGATCGGAAGAGCGGTTTCAG        |
| chr13 | 113976747 | 113976786 | LAMP1_10548 | + | GTGACCTATGCACCAGACGTGCAGGCACAGCTGCAGGGCCCTCTGTCTCCTTCTCTGAGATCGGAAGAGCGGTTTCAG         |
| chr11 | 18418526  | 18418565  | LDHA_10549  | + | GTGACCTATGCACCAGACGTGTCACCACTGGAAGCCATACCTTGACCCCATCCTTAGATCGGAAGAGCGGTTTCAG           |
| chr11 | 18422568  | 18422607  | LDHA_10550  | + | GTGACCTATGCACCAGACGTGACTGCATAAAAATTGACAAGCTATAGTAAAATCAGATCGGAAGAGCGGTTTCAG            |
| chr11 | 18424571  | 18424610  | LDHA_10551  | + | GTGACCTATGCACCAGACGTGTTATTTCTTTTTGTTTTGAAAAGATTATATAAAAAGTAGATCGGAAGAGCGGTTTCAG        |
| chr11 | 18425369  | 18425408  | LDHA_10552  | + | GTGACCTATGCACCAGACGTTTTCAATTTGGCAACACAGAATATTAACATTTACTATTTTAGATCGGAAGAGCGGTTTCAG      |
| chr11 | 18427130  | 18427169  | LDHA_10553  | + | GTGACCTATGCACCAGACGTGATGTATACGCTGCATTTGAATGCTTTTTGCTGGCTTTTAGATCGGAAGAGCGGTTTCAG       |
| chr11 | 18428839  | 18428878  | LDHA_10554  | + | GTGACCTATGCACCAGACGTTGTCAATCATTCTACTGTCTAGGCTACAACAGGATTTAAGATCGGAAGAGCGGTTTCAG        |
| chr2  | 33174023  | 33174062  | LTBP1_10555 | + | GTGACCTATGCACCAGACGTATGTTACAGTGGCCCTGCAGAGTAGGCAAAGTGGGGAGAGATCGGAAGAGCGGTTTCAG        |
| chr2  | 33246284  | 33246323  | LTBP1_10556 | + | GTGACCTATGCACCAGACGTGAACTTTTCATTTAGCTAACAGATCATCTTAATTTACTCTCTAGATCGGAAGAGCGGTTTCAG    |

|       |           |           |              |   |                                                                                      |
|-------|-----------|-----------|--------------|---|--------------------------------------------------------------------------------------|
| chr2  | 33335829  | 33335868  | LTBP1_10557  | + | GTGACCTATGCACCAGACGTTCTTATCAACCATTTTCCCAAGTTATGGTATCAGAGATTGAGATCGGAAGAGCGGTTTCAG    |
| chr2  | 33360038  | 33360077  | LTBP1_10558  | + | GTGACCTATGCACCAGACGTCACCGTCCCTAACCTGTCCTACTGAGTCGAGTTTTATGAAGATCGGAAGAGCGGTTTCAG     |
| chr2  | 33412158  | 33412197  | LTBP1_10559  | + | GTGACCTATGCACCAGACGTTTCATTCCGCCCATTTGCCAGACCTCTGTTAACCTGCCAAAGATCGGAAGAGCGGTTTCAG    |
| chr2  | 33413929  | 33413968  | LTBP1_10560  | + | GTGACCTATGCACCAGACGTTACCGAGCCTGCTTTAGCAGTGTCTTACAGATATGGTATAGATCGGAAGAGCGGTTTCAG     |
| chr2  | 33442732  | 33442771  | LTBP1_10561  | + | GTGACCTATGCACCAGACGTTTTCTCCTCACTCTTTGCAGGTTAATGTAGCATATCTGTTTAGATCGGAAGAGCGGTTTCAG   |
| chr2  | 33447229  | 33447268  | LTBP1_10562  | + | GTGACCTATGCACCAGACGCTGAATTCATTGATGTGGACTCAACAGTTGTTTTGGCTTTAGATCGGAAGAGCGGTTTCAG     |
| chr2  | 33468862  | 33468901  | LTBP1_10563  | + | GTGACCTATGCACCAGACGTTACTTTTTATTCTGTCTTTGGATTAATTGTCCTTTGGGAGATCGGAAGAGCGGTTTCAG      |
| chr2  | 33477922  | 33477961  | LTBP1_10564  | + | GTGACCTATGCACCAGACGTCGCCAGCTGTATGCGCACATAGATTTCCAGCCACATGAGTAAGATCGGAAGAGCGGTTTCAG   |
| chr2  | 33482589  | 33482628  | LTBP1_10565  | + | GTGACCTATGCACCAGACGTTAATGGATCATGGACTCTAGACATCTATCTGTGTGCTTTAGATCGGAAGAGCGGTTTCAG     |
| chr2  | 33484688  | 33484727  | LTBP1_10566  | + | GTGACCTATGCACCAGACGTCATTGCTTGAAGTCTTTTTTTTTCAACGCTCAAAGTGATAGATCGGAAGAGCGGTTTCAG     |
| chr2  | 33487902  | 33487941  | LTBP1_10567  | + | GTGACCTATGCACCAGACGTATCTGTGCTGTTTTGTCAGAGTATTCTGAATAAAAAATGTAAGATCGGAAGAGCGGTTTCAG   |
| chr2  | 33488470  | 33488509  | LTBP1_10568  | + | GTGACCTATGCACCAGACGTTATTTTTACATATATACATCGAGGAGACGTTGGGCTAGATCGGAAGAGCGGTTTCAG        |
| chr2  | 33498859  | 33498898  | LTBP1_10569  | + | GTGACCTATGCACCAGACGTTAGTTGACTAAATTTAAATATCAACATTTGAACAAGATCGGAAGAGCGGTTTCAG          |
| chr2  | 33500168  | 33500207  | LTBP1_10570  | + | GTGACCTATGCACCAGACGTCATTCTTCTGCTTACAATTTCTTAGATCTGAGTTTTTAGATCGGAAGAGCGGTTTCAG       |
| chr2  | 33501001  | 33501040  | LTBP1_10571  | + | GTGACCTATGCACCAGACGTTGAGAGTGTTCAGCACACATGACGGTGATGTGCAGGGTTGAGATCGGAAGAGCGGTTTCAG    |
| chr2  | 33505236  | 33505275  | LTBP1_10572  | + | GTGACCTATGCACCAGACGTTAGTGTACTTATCAAGATTTGTTTTCTTCTGCATGGCCCAAGATCGGAAGAGCGGTTTCAG    |
| chr2  | 33518360  | 33518399  | LTBP1_10573  | + | GTGACCTATGCACCAGACGTTGATCAAGTTTTCCCATTTTTAACTTCATTTAAATAAGATCGGAAGAGCGGTTTCAG        |
| chr2  | 33525651  | 33525690  | LTBP1_10574  | + | GTGACCTATGCACCAGACGTAGTAACATGAACTACTGAACTTTCAGCTTAAAGCACCTGGAGATCGGAAGAGCGGTTTCAG    |
| chr2  | 33534634  | 33534673  | LTBP1_10575  | + | GTGACCTATGCACCAGACGTCCTTTTTTCCCGAGTCATTATTACGTAATTTCTCAATTAGATCGGAAGAGCGGTTTCAG      |
| chr2  | 33540347  | 33540386  | LTBP1_10576  | + | GTGACCTATGCACCAGACGTCACATACGAATCATATTTGTTGTGTATAAAGAGAGAGGAAGATCGGAAGAGCGGTTTCAG     |
| chr2  | 33568041  | 33568080  | LTBP1_10577  | + | GTGACCTATGCACCAGACGTAGATTTTTTCCCAACGTGTTTCACATGTCCCTAGGGAAAAAGATCGGAAGAGCGGTTTCAG    |
| chr2  | 33572588  | 33572627  | LTBP1_10578  | + | GTGACCTATGCACCAGACGTGTGACACTGTGCAAGGGAATGACAGGCTCCTCTCAAAGACAGATCGGAAGAGCGGTTTCAG    |
| chr2  | 33585857  | 33585896  | LTBP1_10579  | + | GTGACCTATGCACCAGACGTTAGTGGTAGAGTACACATTTGTTGGTTCACATGGTGTAGATCGGAAGAGCGGTTTCAG       |
| chr2  | 33586593  | 33586632  | LTBP1_10580  | + | GTGACCTATGCACCAGACGTAGTGGAAACAAATTTTCAGCACATTTGTACATGTACATGATAGATCGGAAGAGCGGTTTCAG   |
| chr2  | 33588596  | 33588635  | LTBP1_10581  | + | GTGACCTATGCACCAGACGTGGGGGATATAGTATGGTGTACTGTGAAATATACAGATGGAGATCGGAAGAGCGGTTTCAG     |
| chr2  | 33589434  | 33589473  | LTBP1_10582  | + | GTGACCTATGCACCAGACGTAGGAGATGCAAACCTGTGTCCAAATACTATCATAAGATTAGATCGGAAGAGCGGTTTCAG     |
| chr2  | 33590581  | 33590620  | LTBP1_10583  | + | GTGACCTATGCACCAGACGTATCCAATTCCTTCTGCAGGAGGCCTTTTGGGGACAAGTTCAAGATCGGAAGAGCGGTTTCAG   |
| chr2  | 33614384  | 33614423  | LTBP1_10584  | + | GTGACCTATGCACCAGACGTTAACTTGTTCCTTTGATACTAAGTTGTGGTTGAAGATTAGATCGGAAGAGCGGTTTCAG      |
| chr2  | 33622360  | 33622399  | LTBP1_10585  | + | GTGACCTATGCACCAGACGTCGTGTTTTATGGATACATTAATTTTTCTGACACCCGAGATCGGAAGAGCGGTTTCAG        |
| chr2  | 33623623  | 33623662  | LTBP1_10586  | + | GTGACCTATGCACCAGACGTACATAAACCATAGCCCATTTCTGCACACTGTGTAAGGAAAGATCGGAAGAGCGGTTTCAG     |
| chr16 | 30128122  | 30128161  | MAPK3_10587  | + | GTGACCTATGCACCAGACGTAGAGACAGCAAGGCTCAGGCCGTCATGGGGGATGCCTACAGATCGGAAGAGCGGTTTCAG     |
| chr16 | 30128335  | 30128374  | MAPK3_10588  | + | GTGACCTATGCACCAGACGTGCAGGAGTCAGGGGTCACAGGGAAGACTGGAGGAGCTCCGAGATCGGAAGAGCGGTTTCAG    |
| chr16 | 30128617  | 30128656  | MAPK3_10589  | + | GTGACCTATGCACCAGACGTGGAGGTGACTTGGTAAATGATCACCTCTTTCTTTCTGGGAAGATCGGAAGAGCGGTTTCAG    |
| chr16 | 30129116  | 30129155  | MAPK3_10590  | + | GTGACCTATGCACCAGACGTGGAGGAAGTGTGAGCTCCTGGCCAGCCTCAACAGGGTTCAGATCGGAAGAGCGGTTTCAG     |
| chr16 | 30129495  | 30129534  | MAPK3_10591  | + | GTGACCTATGCACCAGACGTACCTGCTAAGTGTGCTAGCCGCTCAAGGCCTCTGCAGCTAGATCGGAAGAGCGGTTTCAG     |
| chr16 | 30129870  | 30129909  | MAPK3_10592  | + | GTGACCTATGCACCAGACGTTTTCCGAGACCCCCCAGGCAGGGGGCAGTGGGAGGCACTAGATCGGAAGAGCGGTTTCAG     |
| chr16 | 30133338  | 30133377  | MAPK3_10593  | + | GTGACCTATGCACCAGACGTCCGAGAGAGGCTGCTGCTGTGGCCTTCAAAGGGGGAGTCAGATCGGAAGAGCGGTTTCAG     |
| chr10 | 89265320  | 89265359  | MINPP1_10594 | + | GTGACCTATGCACCAGACGTGGGCGGCCGCTGTGCTGTCCCGTCTCCACCCGCCCTGAGATCGGAAGAGCGGTTTCAG       |
| chr10 | 89268301  | 89268340  | MINPP1_10595 | + | GTGACCTATGCACCAGACGTTGTTGCTTTTTATTTGACTTAACAGTTAAATAATTTGAGATCGGAAGAGCGGTTTCAG       |
| chr10 | 89280937  | 89280976  | MINPP1_10596 | + | GTGACCTATGCACCAGACGTTCAAAAAATGTGAAGTACATTTGAGTACTACTAAACTAGATCGGAAGAGCGGTTTCAG       |
| chr10 | 89312246  | 89312285  | MINPP1_10597 | + | GTGACCTATGCACCAGACGTTAATTTAATCTTTAGGAATCTGCAATGAGTGATTACAGATCGGAAGAGCGGTTTCAG        |
| chr10 | 89265001  | 89265040  | MINPP1_10598 | + | GTGACCTATGCACCAGACGTAGGCCCGCGGGTCCAGGGATGGCGGGGCTAGTAGTACCGGAGATCGGAAGAGCGGTTTCAG    |
| chr11 | 118307670 | 118307709 | MLL_10599    | + | GTGACCTATGCACCAGACGTGAGGAACCCCCAGGTCGGGGTCTCGACCTCTGCGGAGCAGATCGGAAGAGCGGTTTCAG      |
| chr11 | 118339570 | 118339609 | MLL_10600    | + | GTGACCTATGCACCAGACGTTTAAAGTGCATGGTGCCTTTTAAAGTTTTGTTTTGTTAGGAGAAGATCGGAAGAGCGGTTTCAG |
| chr11 | 118345041 | 118345080 | MLL_10601    | + | GTGACCTATGCACCAGACGTTCCACTTGGCTTAAACTAACAGTTTATTGAGCCCTTTAGATCGGAAGAGCGGTTTCAG       |
| chr11 | 118347708 | 118347747 | MLL_10602    | + | GTGACCTATGCACCAGACGTTAAGGTCAACTCTTGAGTCCGGAACAGACTTTTGATTTGTTTAGATCGGAAGAGCGGTTTCAG  |
| chr11 | 118348927 | 118348966 | MLL_10603    | + | GTGACCTATGCACCAGACGTGTTTCACTCTGAGATGTTGACCTCTCAACCATAAAGGTTGAGATCGGAAGAGCGGTTTCAG    |
| chr11 | 118350964 | 118351003 | MLL_10604    | + | GTGACCTATGCACCAGACGTTAAAAAGGTCTTCCCCAAATGCTCCTTGCTTAAATGGTGTAGATCGGAAGAGCGGTTTCAG    |
| chr11 | 118352818 | 118352857 | MLL_10605    | + | GTGACCTATGCACCAGACGTAGGGCAAGAAGGAATGCTGAACCACAAGTACTAACAATAAAGATCGGAAGAGCGGTTTCAG    |
| chr11 | 118353221 | 118353260 | MLL_10606    | + | GTGACCTATGCACCAGACGTATTTGTTTCTCTGCCATTTCTCAGGGATGTATTCTATTTAGATCGGAAGAGCGGTTTCAG     |
| chr11 | 118355040 | 118355079 | MLL_10607    | + | GTGACCTATGCACCAGACGTTCAAGTATCAAAAGTATTTGAGTGTCAAAGACTTTAAAGATCGGAAGAGCGGTTTCAG       |
| chr11 | 118355701 | 118355740 | MLL_10608    | + | GTGACCTATGCACCAGACGTTCTGCTTCTTTGATCCCAAGGAAGTACATAAAATTTTTCAGATCGGAAGAGCGGTTTCAG     |
| chr11 | 118360613 | 118360652 | MLL_10609    | + | GTGACCTATGCACCAGACGTCACATGATGCTCTTTTTATAGAGAACCACCATGTGACTATTAGATCGGAAGAGCGGTTTCAG   |
| chr11 | 118360975 | 118361014 | MLL_10610    | + | GTGACCTATGCACCAGACGTAAGCCAGTTTTGCCAGCTTTCGGAGGTTGACTTGGTGTAGATCGGAAGAGCGGTTTCAG      |
| chr11 | 118362035 | 118362074 | MLL_10611    | + | GTGACCTATGCACCAGACGTTTGGAGTCTTTTTATTTCAGTTTTCTCTTCTAGTACTAGATCGGAAGAGCGGTTTCAG       |
| chr11 | 118362654 | 118362693 | MLL_10612    | + | GTGACCTATGCACCAGACGTTCTCATTTTTCTGAGAGCTTGTCTTAGGTAGTCTTTAAGATCGGAAGAGCGGTTTCAG       |
| chr11 | 118363956 | 118363995 | MLL_10613    | + | GTGACCTATGCACCAGACGTTACTGAGCCATCAGAATTTCTAGCCAAATAAAGCTTGTAGATCGGAAGAGCGGTTTCAG      |
| chr11 | 118365124 | 118365163 | MLL_10614    | + | GTGACCTATGCACCAGACGTTTACTAATTCATGTTTTTAAATGCTTACTTAAGTAATTAAGATCGGAAGAGCGGTTTCAG     |

|       |           |           |            |   |                                                                                     |
|-------|-----------|-----------|------------|---|-------------------------------------------------------------------------------------|
| chr11 | 118365493 | 118365532 | MLL_10615  | + | GTGACCTATGCACCAGACGTTTAGCATAACTTTTTTCTCCTCATCGGCTAGAAAATCTGAGATCGGAAGAGCGGTTTCAG    |
| chr11 | 118366619 | 118366658 | MLL_10616  | + | GTGACCTATGCACCAGACGTAAAAGGAGAGTCGTCACCCATTTCCCTCTAGATGCAGATGAGATCGGAAGAGCGGTTTCAG   |
| chr11 | 118367093 | 118367132 | MLL_10617  | + | GTGACCTATGCACCAGACGTTGCAACACAGGGCCCTAGTTAATACATACTCCAAAAGAACAGATCGGAAGAGCGGTTTCAG   |
| chr11 | 118368799 | 118368838 | MLL_10618  | + | GTGACCTATGCACCAGACGTATGGGTAATTTTATGAAAGAGATTCCTCTCAGTTTCCAAGATCGGAAGAGCGGTTTCAG     |
| chr11 | 118370146 | 118370185 | MLL_10619  | + | GTGACCTATGCACCAGACGTGCCTTGGTTATTGGGGAAGCCTGTATATATCATTGGGGAAAGATCGGAAGAGCGGTTTCAG   |
| chr11 | 118370639 | 118370678 | MLL_10620  | + | GTGACCTATGCACCAGACGCTATAAAGAGGAAGAGCAGCCCAACCTGAACACACTAGATCGGAAGAGCGGTTTCAG        |
| chr11 | 118372583 | 118372622 | MLL_10621  | + | GTGACCTATGCACCAGACGTTTATTGACCTACTTGACCTAAGAAGACTAGCCCAAAGACTAGCCGAAGAGCGGTTTCAG     |
| chr11 | 118377372 | 118377411 | MLL_10622  | + | GTGACCTATGCACCAGACGTCAAACTAGCTAGGCTGGGCTGTGGGATTTTCATGTTGTAGATCGGAAGAGCGGTTTCAG     |
| chr11 | 118378335 | 118378374 | MLL_10623  | + | GTGACCTATGCACCAGACGTGAATTCGCTTTTTAAGACTAAGCTCTCAGTTTTGTCCACCAGATCGGAAGAGCGGTTTCAG   |
| chr11 | 118380844 | 118380883 | MLL_10624  | + | GTGACCTATGCACCAGACGTAAATCAGGTTGACCCATCAGCAGAAGCCCTGTTTCAGCTAGATCGGAAGAGCGGTTTCAG    |
| chr11 | 118382751 | 118382790 | MLL_10625  | + | GTGACCTATGCACCAGACGTGAGGTTGTTATCCACTCTGTCTCAGAATATTATGGTAAAAGATCGGAAGAGCGGTTTCAG    |
| chr11 | 118390518 | 118390557 | MLL_10626  | + | GTGACCTATGCACCAGACGTTTCTTTCTGCAGCAGTTTTGGTCTCGATTTTCTTATCAGATCGGAAGAGCGGTTTCAG      |
| chr11 | 118390790 | 118390829 | MLL_10627  | + | GTGACCTATGCACCAGACGTAGTGGGGAGCATTAGAAACTGCTTTCCCTCTCCCTCCAGATCGGAAGAGCGGTTTCAG      |
| chr11 | 118391611 | 118391650 | MLL_10628  | + | GTGACCTATGCACCAGACGTAATTTCTAGAAAAGATTACAGAAAACGAATGCAGTTTTTCAAGATCGGAAGAGCGGTTTCAG  |
| chr11 | 118392143 | 118392182 | MLL_10629  | + | GTGACCTATGCACCAGACGTCACTTGCACTCACACAGTTCTTTTGTGTTGCTGTAGAAAAGATCGGAAGAGCGGTTTCAG    |
| chr11 | 118392898 | 118392937 | MLL_10630  | + | GTGACCTATGCACCAGACGTCTCCCCAGTGTGGAGTGCAAGGAGCCGGGGCCATCCAAAGATCGGAAGAGCGGTTTCAG     |
| chr11 | 118342829 | 118342868 | MLL_10631  | + | GTGACCTATGCACCAGACGCTCATTAACTTGAECTGAAAAGCCCGGAAAGTCCGGAAGATCGGAAGAGCGGTTTCAG       |
| chr11 | 118343271 | 118343310 | MLL_10632  | + | GTGACCTATGCACCAGACGTTCCAGACTCTCTCAAATGTCTTCAAAGATCGACTCCCTCAGATCGGAAGAGCGGTTTCAG    |
| chr11 | 118343713 | 118343752 | MLL_10633  | + | GTGACCTATGCACCAGACGTAGAACCCGACATTTAGGTGGACTCTTTAAAGCATTCTAGGAGATCGGAAGAGCGGTTTCAG   |
| chr11 | 118344155 | 118344194 | MLL_10634  | + | GTGACCTATGCACCAGACGTAGGCTTAGTAGTTCTGAGCTCTCACCTCTCACCCCCCGTAGATCGGAAGAGCGGTTTCAG    |
| chr11 | 118344597 | 118344636 | MLL_10635  | + | GTGACCTATGCACCAGACGTTGGGTAGGGTTTCCAAAGAGAAGGTTGTTGGTGAAGATGTAGATCGGAAGAGCGGTTTCAG   |
| chr11 | 118373595 | 118373634 | MLL_10636  | + | GTGACCTATGCACCAGACGTGGAATTCCTAAACTGGCCCCACAGGTTTATAACACAACATAGATCGGAAGAGCGGTTTCAG   |
| chr11 | 118374067 | 118374106 | MLL_10637  | + | GTGACCTATGCACCAGACGTTGATAAGATTGGTATAAAGCCCTTCTATGCCAGGATAGATCGGAAGAGCGGTTTCAG       |
| chr11 | 118374539 | 118374578 | MLL_10638  | + | GTGACCTATGCACCAGACGTTGAAGAAGCATTGCAATCTCAGCAGCTCAACTGGGAAAGATCGGAAGAGCGGTTTCAG      |
| chr11 | 118375011 | 118375050 | MLL_10639  | + | GTGACCTATGCACCAGACGTGCTCAGCTCAGCTCATTGGAGTCAAGCCGCAGAGTCCACAAGATCGGAAGAGCGGTTTCAG   |
| chr11 | 118375483 | 118375522 | MLL_10640  | + | GTGACCTATGCACCAGACGTGGGAGAAGAGAGTAACCATCACAGAAAAATCTGTAGCCTCAGATCGGAAGAGCGGTTTCAG   |
| chr11 | 118375955 | 118375994 | MLL_10641  | + | GTGACCTATGCACCAGACGTTGTGATGGAGACAATACTTACAGTATTGGGACCCATGGGAAGATCGGAAGAGCGGTTTCAG   |
| chr11 | 118376427 | 118376466 | MLL_10642  | + | GTGACCTATGCACCAGACGTTTGGGGCTCACTTAACTTTCATCTCACCCGAATGTCCCAAGATCGGAAGAGCGGTTTCAG    |
| chr11 | 118376899 | 118376938 | MLL_10643  | + | GTGACCTATGCACCAGACGTTGCTCCCTCCACTCAGACTCGGGCATAACAGCCGCTTCAGATCGGAAGAGCGGTTTCAG     |
| chr7  | 151834020 | 151834059 | MLL3_10644 | + | GTGACCTATGCACCAGACGTTAAAGACACAGGGTAAGAAAAGCAGCAAGGAAGGCAATAAGATCGGAAGAGCGGTTTCAG    |
| chr7  | 151836000 | 151836039 | MLL3_10645 | + | GTGACCTATGCACCAGACGTCCATGTCAGAAAAGTATTGTAAAAACAGCTAGAAGCAGCAGATCGGAAGAGCGGTTTCAG    |
| chr7  | 151836355 | 151836394 | MLL3_10646 | + | GTGACCTATGCACCAGACGTAGTCAGTACAGTAAGTCATCAATGTGCGACTGAAACTCCCAGATCGGAAGAGCGGTTTCAG   |
| chr7  | 151836887 | 151836926 | MLL3_10647 | + | GTGACCTATGCACCAGACGTGTGTGTACATACTCCAATTTATGTGACAAACAAGTCTTTTATAGATCGGAAGAGCGGTTTCAG |
| chr7  | 151841977 | 151842016 | MLL3_10648 | + | GTGACCTATGCACCAGACGTTGGCATATCAACAGGAAAAAATCAAGGAAAACTGAAGAAGATCGGAAGAGCGGTTTCAG     |
| chr7  | 151842391 | 151842430 | MLL3_10649 | + | GTGACCTATGCACCAGACGTGCAAAAGCAGACACAAGACTCCCTTCTGATGGAGACTCAGATCGGAAGAGCGGTTTCAG     |
| chr7  | 151843831 | 151843870 | MLL3_10650 | + | GTGACCTATGCACCAGACGTACAAAAACATAATTTTTATAGAAAATAGGATACAGTATAAAGATCGGAAGAGCGGTTTCAG   |
| chr7  | 151846248 | 151846287 | MLL3_10651 | + | GTGACCTATGCACCAGACGTTAAAGAAAACCATGACAAAAGAAAAATAATCACAAAGCCCGGAGATCGGAAGAGCGGTTTCAG |
| chr7  | 151848103 | 151848142 | MLL3_10652 | + | GTGACCTATGCACCAGACGTAAAGAAAATGTGTGGGAATCTCAACAAGTCAAATTTAATAGATCGGAAGAGCGGTTTCAG    |
| chr7  | 151848677 | 151848716 | MLL3_10653 | + | GTGACCTATGCACCAGACGTTCAACTTTTGTAGTAATAAAACACTGACTGATGACACAAGAGATCGGAAGAGCGGTTTCAG   |
| chr7  | 151850050 | 151850089 | MLL3_10654 | + | GTGACCTATGCACCAGACGTGCAAAATGCTGATTAATTCACCAGAAGGCAACAGTGAAGATCGGAAGAGCGGTTTCAG      |
| chr7  | 151851242 | 151851281 | MLL3_10655 | + | GTGACCTATGCACCAGACGTAGAGAAAAAAGAGGAAAATAGTGTAAATGGATTTTCAAAGATCGGAAGAGCGGTTTCAG     |
| chr7  | 151851541 | 151851580 | MLL3_10656 | + | GTGACCTATGCACCAGACGTATAAACACACACATCAAAGTCTGCAAAATCCACCCTGGGGAGATCGGAAGAGCGGTTTCAG   |
| chr7  | 151853153 | 151853192 | MLL3_10657 | + | GTGACCTATGCACCAGACGTAAAAACACAAAACCATAAATACATTGATCAATATTGATAAGATCGGAAGAGCGGTTTCAG    |
| chr7  | 151853442 | 151853481 | MLL3_10658 | + | GTGACCTATGCACCAGACGTCCAAAAAATTTAAATTTATGCTACTGAGCGAATATGCAAGATCGGAAGAGCGGTTTCAG     |
| chr7  | 151856168 | 151856207 | MLL3_10659 | + | GTGACCTATGCACCAGACGTTGAAAAGGGTAAAAAATAAGTGAACAATTTGATATTTGGAGATCGGAAGAGCGGTTTCAG    |
| chr7  | 151860922 | 151860961 | MLL3_10660 | + | GTGACCTATGCACCAGACGTAAATGACTATTACTACTTATACAGCATAGGTAAGATCGGAAGAGCGGTTTCAG           |
| chr7  | 151864474 | 151864513 | MLL3_10661 | + | GTGACCTATGCACCAGACGTATAAAATTCAGTTGTGTTAATTTTCAAAGAGTCCAACAAGATCGGAAGAGCGGTTTCAG     |
| chr7  | 151866345 | 151866384 | MLL3_10662 | + | GTGACCTATGCACCAGACGTTAAAAATTTACAAATATGTTTATCCACATTTTCAGTTAAAGAGATCGGAAGAGCGGTTTCAG  |
| chr7  | 151871338 | 151871377 | MLL3_10663 | + | GTGACCTATGCACCAGACGTAAATATAAAGTTACTTATTTTATAGTAATTAGTTCAACGTAAGATCGGAAGAGCGGTTTCAG  |
| chr7  | 151877222 | 151877261 | MLL3_10664 | + | GTGACCTATGCACCAGACGTAGAAAACAAAAATCACTGGGATTTGTGGTAATTAATGGCTTAGATCGGAAGAGCGGTTTCAG  |
| chr7  | 151879690 | 151879729 | MLL3_10665 | + | GTGACCTATGCACCAGACGTAGAAAAGAAAAAGCAATCATATTTAGTTAAGGAAGAAAAAGATCGGAAGAGCGGTTTCAG    |
| chr7  | 151880252 | 151880291 | MLL3_10666 | + | GTGACCTATGCACCAGACGTAGAAAGAAAAAATTTCCAGATTTGTTAAATGTTTTAAGATCGGAAGAGCGGTTTCAG       |
| chr7  | 151882727 | 151882766 | MLL3_10667 | + | GTGACCTATGCACCAGACGTAGAACAGAGTATAACACTTTCTCAGAGCCATGCTAATGATAGATCGGAAGAGCGGTTTCAG   |
| chr7  | 151884572 | 151884611 | MLL3_10668 | + | GTGACCTATGCACCAGACGTATAAATATCTTTACTTTTATGAACATAAAAATACTTCTTAAAGATCGGAAGAGCGGTTTCAG  |
| chr7  | 151884943 | 151884982 | MLL3_10669 | + | GTGACCTATGCACCAGACGTAAAAATAATTTCCGTTGGCATGATATTCACAAGTAACAAGGAGATCGGAAGAGCGGTTTCAG  |
| chr7  | 151891224 | 151891263 | MLL3_10670 | + | GTGACCTATGCACCAGACGTAAACAATAATAGTAAACAAGATTAAGAGCTAGTAGGGTCCAGATCGGAAGAGCGGTTTCAG   |
| chr7  | 151891357 | 151891396 | MLL3_10671 | + | GTGACCTATGCACCAGACGTTAAAAAATAAAGAAAAAGTAAACACTACTAATTCAGATCGGAAGAGCGGTTTCAG         |
| chr7  | 151891664 | 151891703 | MLL3_10672 | + | GTGACCTATGCACCAGACGTAAAAAATAAATTTAAAGGTTACTTCAAGATCTCACACAGATCGGAAGAGCGGTTTCAG      |



|      |           |           |             |   |                                                                                      |
|------|-----------|-----------|-------------|---|--------------------------------------------------------------------------------------|
| chr7 | 151893107 | 151893146 | MLL3_10673  | + | GTGACCTATGCACCAGACGTTAAATATGTTTTTAAAAATTCAGTATTTCTCAGATATTAGATCGGAAGAGCGGTTTCAG      |
| chr7 | 151896555 | 151896594 | MLL3_10674  | + | GTGACCTATGCACCAGACGTATAAGCACATACAAAATGGTTAGAAAATTTCTAAAAAGACAGATCGGAAGAGCGGTTTCAG    |
| chr7 | 151900160 | 151900199 | MLL3_10675  | + | GTGACCTATGCACCAGACGTAGTCACATTTATAAATATGTGACATTTAAAAATTTCTAGACAGATCGGAAGAGCGGTTTCAG   |
| chr7 | 151902321 | 151902360 | MLL3_10676  | + | GTGACCTATGCACCAGACGTAAGAAATTAGGTAAACTGATAAGTAATTTCTCCCTACATTAGATCGGAAGAGCGGTTTCAG    |
| chr7 | 151904524 | 151904563 | MLL3_10677  | + | GTGACCTATGCACCAGACGTGTAATGTATACACAAAACCTGGAAGAACCTATCAAATATAAGATCGGAAGAGCGGTTTCAG    |
| chr7 | 151917831 | 151917870 | MLL3_10678  | + | GTGACCTATGCACCAGACGTAATAAATCCCAAGGATCAAAAATTTAAACTTTTCAATTTAGATCGGAAGAGCGGTTTCAG     |
| chr7 | 151919162 | 151919201 | MLL3_10679  | + | GTGACCTATGCACCAGACGTAAAAAATAAATCCAGGTAATTTCTTTTCAGAAAAGGTTAAAGTAGATCGGAAGAGCGGTTTCAG |
| chr7 | 151919778 | 151919817 | MLL3_10680  | + | GTGACCTATGCACCAGACGTCATATTTGTACATTTTTTTTTAAAAATGGAATACTGAGAGATCGGAAGAGCGGTTTCAG      |
| chr7 | 151921275 | 151921314 | MLL3_10681  | + | GTGACCTATGCACCAGACGTAATCCCCCGAAAAGTCTCAATTTTATTTTCTAGTTACTAGATCGGAAGAGCGGTTTCAG      |
| chr7 | 151921712 | 151921751 | MLL3_10682  | + | GTGACCTATGCACCAGACGTAAACAAACCAATCCATGTGATTTATGCATTAACCTAACATAAAGATCGGAAGAGCGGTTTCAG  |
| chr7 | 151927123 | 151927162 | MLL3_10683  | + | GTGACCTATGCACCAGACGTGAAAACAGAACATATTTAAATGGAGACTAAGCTAAAAACAGATCGGAAGAGCGGTTTCAG     |
| chr7 | 151927417 | 151927456 | MLL3_10684  | + | GTGACCTATGCACCAGACGTAAAAATACACAGAATACGAAGTTATATTTTTCACTTGTTTAGATCGGAAGAGCGGTTTCAG    |
| chr7 | 151933029 | 151933068 | MLL3_10685  | + | GTGACCTATGCACCAGACGTGATTTGGGAAAAGTCAACATTTCTGTGACAGACCAAATAATAGATCGGAAGAGCGGTTTCAG   |
| chr7 | 151935922 | 151935961 | MLL3_10686  | + | GTGACCTATGCACCAGACGTGCAGTTGAGAAAATAGATGTGTAATAACTCAGCAACATAAAAGATCGGAAGAGCGGTTTCAG   |
| chr7 | 151945716 | 151945755 | MLL3_10687  | + | GTGACCTATGCACCAGACGTCAGAACATTTGTTATGGCAATGTACAACAAAATTTAAATAGATCGGAAGAGCGGTTTCAG     |
| chr7 | 151947049 | 151947088 | MLL3_10688  | + | GTGACCTATGCACCAGACGTCACATTTATAAAAACTCTAAGGAGTCAAATTTCTGTAACAGATCGGAAGAGCGGTTTCAG     |
| chr7 | 151948062 | 151948101 | MLL3_10689  | + | GTGACCTATGCACCAGACGTAATTTAATTTCTTTAGCTCAGAATGAGTTTTTTTCTTTGAGATCGGAAGAGCGGTTTCAG     |
| chr7 | 151949186 | 151949225 | MLL3_10690  | + | GTGACCTATGCACCAGACGTAAGTATACTTAAATAAAAATTTCTAACATCGAGTTATATAGATCGGAAGAGCGGTTTCAG     |
| chr7 | 151949811 | 151949850 | MLL3_10691  | + | GTGACCTATGCACCAGACGTGGAATAATAAATAAACAACAGTTTTGTTATGCATTTGTAAAGATCGGAAGAGCGGTTTCAG    |
| chr7 | 151960226 | 151960265 | MLL3_10692  | + | GTGACCTATGCACCAGACGTAGATAGCATTATGATGCCTTATCTTTAAACTTATGTTTAGATCGGAAGAGCGGTTTCAG      |
| chr7 | 151962305 | 151962344 | MLL3_10693  | + | GTGACCTATGCACCAGACGTCAGTGAAACAATGAAATGTTGTATAAGAAATTTAAATTTTAGATCGGAAGAGCGGTTTCAG    |
| chr7 | 151970963 | 151971002 | MLL3_10694  | + | GTGACCTATGCACCAGACGTTAAAGGAGAGAAATCTCTTTATAAAACCTTGAAAAGGAATAGATCGGAAGAGCGGTTTCAG    |
| chr7 | 152007171 | 152007210 | MLL3_10695  | + | GTGACCTATGCACCAGACGTAATAAATGAAAAGGAGCAAATGAGCAAACATAAAAAAATAGATCGGAAGAGCGGTTTCAG     |
| chr7 | 152009042 | 152009081 | MLL3_10696  | + | GTGACCTATGCACCAGACGTAAATGAAAATAACTGTGAAAAGTGAACAAACAGCAAAAATTTAGATCGGAAGAGCGGTTTCAG  |
| chr7 | 152012434 | 152012473 | MLL3_10697  | + | GTGACCTATGCACCAGACGTTGAAATGTAAGTCAGAGAAGGAGAAAAGTAGCTTTATTCAAGATCGGAAGAGCGGTTTCAG    |
| chr7 | 152027835 | 152027874 | MLL3_10698  | + | GTGACCTATGCACCAGACGTGAAACAAGAGAAAACAAGAGTCAATTTTTGTTTATTATTAGATCGGAAGAGCGGTTTCAG     |
| chr7 | 152055771 | 152055810 | MLL3_10699  | + | GTGACCTATGCACCAGACGTAAAAAATAAATAAGTACATAGAGTTAAATGTTAAATTTAGATCGGAAGAGCGGTTTCAG      |
| chr7 | 152132882 | 152132921 | MLL3_10700  | + | GTGACCTATGCACCAGACGTAGGAAAAGCACATGGATCCCGGTCCTCCTCCTGGGGGCTAGATCGGAAGAGCGGTTTCAG     |
| chr7 | 151945356 | 151945395 | MLL3_10701  | + | GTGACCTATGCACCAGACGTTTGTAGCCTTTCTATAACCAACTGTTCTCCTCAGGACATAAGATCGGAAGAGCGGTTTCAG    |
| chr7 | 151845501 | 151845540 | MLL3_10702  | + | GTGACCTATGCACCAGACGTGGGCAAAGCATGTTTTGTCTTAAAAAACATGCATTTGTGAGATCGGAAGAGCGGTTTCAG     |
| chr7 | 151845874 | 151845913 | MLL3_10703  | + | GTGACCTATGCACCAGACGTCATTTTCATCTCACAAGGTGGTTTTAAATGTCCCTTAGGAGATCGGAAGAGCGGTTTCAG     |
| chr7 | 151859639 | 151859678 | MLL3_10704  | + | GTGACCTATGCACCAGACGTGGCCTGCTGCCATATTTGGGAGTGGATGGGCCACTGGTTTCAATCGGAAGAGCGGTTTCAG    |
| chr7 | 151873741 | 151873780 | MLL3_10705  | + | GTGACCTATGCACCAGACGTTAATGTCTGAATTATCAGATTTCTCATTAGCAAGTAAACTAGATCGGAAGAGCGGTTTCAG    |
| chr7 | 151878277 | 151878316 | MLL3_10706  | + | GTGACCTATGCACCAGACGTGCTGGTGGCTGAGAGTAAGGGCAGAAATTCAGGCTTTGAGATCGGAAGAGCGGTTTCAG      |
| chr7 | 151860066 | 151860105 | MLL3_10707  | + | GTGACCTATGCACCAGACGTCACAGAAAATAAATTTAGGCTTCAACAAGGGATTGATGTTAGATCGGAAGAGCGGTTTCAG    |
| chr7 | 151874196 | 151874235 | MLL3_10708  | + | GTGACCTATGCACCAGACGTATTGGAAGGTCTAGTTCCTCATTAAACATGCTTTTTCTTATAGATCGGAAGAGCGGTTTCAG   |
| chr7 | 151878748 | 151878787 | MLL3_10709  | + | GTGACCTATGCACCAGACGTGCCTTGTATGCTGTGACACTGATCCATAAGGATCCTGAGAGATCGGAAGAGCGGTTTCAG     |
| chr7 | 151860493 | 151860532 | MLL3_10710  | + | GTGACCTATGCACCAGACGTGGATTGTTGTCATCAAATTTCTACCCGAGGTGGTGGTCCACAGATCGGAAGAGCGGTTTCAG   |
| chr7 | 151874651 | 151874690 | MLL3_10711  | + | GTGACCTATGCACCAGACGTTGGCACTTGTCCAAATCTGGGTGCACAGGTAGCTGATTAAGATCGGAAGAGCGGTTTCAG     |
| chr7 | 151879219 | 151879258 | MLL3_10712  | + | GTGACCTATGCACCAGACGTGGAGTGGTCGAGGGTACCAACCATTTTGCATATGGATAGATCGGAAGAGCGGTTTCAG       |
| chr3 | 49925006  | 49925045  | MST1R_10713 | + | GTGACCTATGCACCAGACGTAAAGGGATGTCAAGTTAAGGCAATTTCCACCAGGATTCAGATCGGAAGAGCGGTTTCAG      |
| chr3 | 49927504  | 49927543  | MST1R_10714 | + | GTGACCTATGCACCAGACGTGGGGAGGTGAGGGGACTCAACTACCCCAAAATTTGGGGGAGATCGGAAGAGCGGTTTCAG     |
| chr3 | 49928094  | 49928133  | MST1R_10715 | + | GTGACCTATGCACCAGACGTGGGAGAGGATCACACTTAGGACTGGCCCTTACCAGGCCCTAGATCGGAAGAGCGGTTTCAG    |
| chr3 | 49928750  | 49928789  | MST1R_10716 | + | GTGACCTATGCACCAGACGTAGGTGGGTTGGTGGGCAAGGGCACAGCAGCTCCTTCTCCAAGATCGGAAGAGCGGTTTCAG    |
| chr3 | 49929024  | 49929063  | MST1R_10717 | + | GTGACCTATGCACCAGACGTGCGCAAGTCAGGCAGGGCAGGGGCTCCCTTTATAAGGCAGATCGGAAGAGCGGTTTCAG      |
| chr3 | 49929282  | 49929321  | MST1R_10718 | + | GTGACCTATGCACCAGACGTGTGCATAATGAGTCGATGAGGGGACTCCAGGCCAAGGAGATCGGAAGAGCGGTTTCAG       |
| chr3 | 49932817  | 49932856  | MST1R_10719 | + | GTGACCTATGCACCAGACGTAGGGAAATGAGGAGCTTGATAGGGCAGGGGTGGCTTTAGCAGATCGGAAGAGCGGTTTCAG    |
| chr3 | 49932992  | 49933031  | MST1R_10720 | + | GTGACCTATGCACCAGACGTAGAATCCTTGGTGGCTTGGCTTTCCAAGCTCCTAGGGGCCAGATCGGAAGAGCGGTTTCAG    |
| chr3 | 49933324  | 49933363  | MST1R_10721 | + | GTGACCTATGCACCAGACGTGTGGCAACTCAGGCCAGCCTGTAGGCCCTCTGCCCGTGTAGATCGGAAGAGCGGTTTCAG     |
| chr3 | 49933551  | 49933590  | MST1R_10722 | + | GTGACCTATGCACCAGACGTGGTCATGAGACCAGCCAGTGGCTGGCCCTACTTTTCAAGATCGGAAGAGCGGTTTCAG       |
| chr3 | 49933848  | 49933887  | MST1R_10723 | + | GTGACCTATGCACCAGACGTCATATGAGATGATTAAGCCAGAACCCCACTGTGATTTAGATCGGAAGAGCGGTTTCAG       |
| chr3 | 49934077  | 49934116  | MST1R_10724 | + | GTGACCTATGCACCAGACGTGGGTAGGTTAGGCTTTGGGTTGCTTCCAAGCTGGCTGATCGGAAGAGCGGTTTCAG         |
| chr3 | 49934334  | 49934373  | MST1R_10725 | + | GTGACCTATGCACCAGACGTAAGAGATTGGGCTCAAGGTTACCCCTTTTGTGATGGCCAGATCGGAAGAGCGGTTTCAG      |
| chr3 | 49934860  | 49934899  | MST1R_10726 | + | GTGACCTATGCACCAGACGTATAGAGGTGGCTTAGGCAGGTCCTCCACTCCAAGCCCTCAGATCGGAAGAGCGGTTTCAG     |
| chr3 | 49935129  | 49935168  | MST1R_10727 | + | GTGACCTATGCACCAGACGTAGGGGAACCCCTGAGGTGAGCCAGGAATACACAGGCCAAGATCGGAAGAGCGGTTTCAG      |
| chr3 | 49935655  | 49935694  | MST1R_10728 | + | GTGACCTATGCACCAGACGTGGAACAGCCCTGAGTCCATGTGGGGTTGGGCTCTCTCAAGATCGGAAGAGCGGTTTCAG      |
| chr3 | 49936132  | 49936171  | MST1R_10729 | + | GTGACCTATGCACCAGACGTGAAGCAGGTGACTCAGGGTCCCTGGAGGGAGATCGGAAGAGCGGTTTCAG               |
| chr3 | 49936439  | 49936478  | MST1R_10730 | + | GTGACCTATGCACCAGACGTTAGATGTGACAAAATGGGGTGGAGCAAGAGACCCAGGAGATCGGAAGAGCGGTTTCAG       |

|       |           |           |             |   |                                                                                     |
|-------|-----------|-----------|-------------|---|-------------------------------------------------------------------------------------|
| chr3  | 49936707  | 49936746  | MST1R_10731 | + | GTGACCTATGCACCAGACGTTCCAGGGAAGGGGAGGAGTTCAGGGTTCAGCCTTGTCGCCCGAGATCGGAAGAGCGGTTTCAG |
| chr3  | 49941053  | 49941092  | MST1R_10732 | + | GTGACCTATGCACCAGACGTTGGGACCCTAGAGGATCCCTACCGGCCCTGGGCCTGGACCTAGATCGGAAGAGCGGTTTCAG  |
| chr3  | 49940233  | 49940272  | MST1R_10733 | + | GTGACCTATGCACCAGACGTTGTACAGCTGGCCGGCTGTACAGTACAGGAGTATACGAAGAGATCGGAAGAGCGGTTTCAG   |
| chr3  | 49940643  | 49940682  | MST1R_10734 | + | GTGACCTATGCACCAGACGTTGACCAGCGCAGGCAGCGCGGGATCCAGCACCGACCTTAGATCGGAAGAGCGGTTTCAG     |
| chr1  | 155158696 | 155158735 | MUC1_10735  | + | GTGACCTATGCACCAGACGTTGGAAAAGAGATCCAGGGTGAGGAGCAAAGGTACCTCCTAAGATCGGAAGAGCGGTTTCAG   |
| chr1  | 155159861 | 155159900 | MUC1_10736  | + | GTGACCTATGCACCAGACGTAGGAGGTTTGGCAGGCCATGGAGTGCCCTTACCAGGGGAGATCGGAAGAGCGGTTTCAG     |
| chr1  | 155160063 | 155160102 | MUC1_10737  | + | GTGACCTATGCACCAGACGTAAAGCAGTGGTTCAGGGCAGCTCCAGAGGAGGGCCCTCAGATCGGAAGAGCGGTTTCAG     |
| chr1  | 155160345 | 155160384 | MUC1_10738  | + | GTGACCTATGCACCAGACGTGAAAATGGGCACCTCAGCCACGGGTCCAGCTCCTGGCTCAAGATCGGAAGAGCGGTTTCAG   |
| chr1  | 155160550 | 155160589 | MUC1_10739  | + | GTGACCTATGCACCAGACGTAGGGAAAGGACTCAGGCTTGATGCAAAGGGTGTGGACAGTAGATCGGAAGAGCGGTTTCAG   |
| chr1  | 155160699 | 155160738 | MUC1_10740  | + | GTGACCTATGCACCAGACGTGGAATTAAGTGGAGGTTTTGAAATGTGAAAAGACAGGAAAAGATCGGAAGAGCGGTTTCAG   |
| chr1  | 155160718 | 155160757 | MUC1_10741  | + | GTGACCTATGCACCAGACGTGAAATGTGAAAAGACAGGAAAAGAAAAGACCCCGATAGATCGGAAGAGCGGTTTCAG       |
| chr1  | 155160772 | 155160811 | MUC1_10742  | + | GTGACCTATGCACCAGACGTGTCTGTGATTGGAGAGGTTGAGAGGAGTACCGTGCTATAGATCGGAAGAGCGGTTTCAG     |
| chr1  | 155162085 | 155162124 | MUC1_10743  | + | GTGACCTATGCACCAGACGTTTTAGGGCTGTGGTAGCTGTAAAGAGTAAAGTCTATAGGATCGGAAGAGCGGTTTCAG      |
| chr1  | 155162112 | 155162151 | MUC1_10744  | + | GTGACCTATGCACCAGACGTTTAAAGTCAAGGGTTGGTCTTTATGAAGAAAATAAGAGATCGGAAGAGCGGTTTCAG       |
| chr1  | 155162645 | 155162684 | MUC1_10745  | + | GTGACCTATGCACCAGACGTAAATGGGTGGGAGGGGGCAGAACAGATTCAGGCAGGCGCAGATCGGAAGAGCGGTTTCAG    |
| chr10 | 76603247  | 76603286  | MYST4_10746 | + | GTGACCTATGCACCAGACGTGAGTAATGTCTGTCATTCTCACTACTGTCCTTTTGTCTTAGATCGGAAGAGCGGTTTCAG    |
| chr10 | 76719847  | 76719886  | MYST4_10747 | + | GTGACCTATGCACCAGACGTTTTTCCCTATGTGGTGTACAATGACTCCCATTTATCAGATCGGAAGAGCGGTTTCAG       |
| chr10 | 76729544  | 76729583  | MYST4_10748 | + | GTGACCTATGCACCAGACGTCCCCGTAATCCCGCTCCAGTCACTTAATTCAGATAGATCGGAAGAGCGGTTTCAG         |
| chr10 | 76729870  | 76729909  | MYST4_10749 | + | GTGACCTATGCACCAGACGTAAACTGTACTAAAGTATTTTTATTACATATTGGTTAGCAGATCGGAAGAGCGGTTTCAG     |
| chr10 | 76732408  | 76732447  | MYST4_10750 | + | GTGACCTATGCACCAGACGTATCTTATCAAAAGAAATCATTTATGTTTTGCTTTAAATAAGATCGGAAGAGCGGTTTCAG    |
| chr10 | 76736099  | 76736138  | MYST4_10751 | + | GTGACCTATGCACCAGACGTGGTCAAAGCTCCAACCAAACCTGCGTCCCGTCCCTTTCTCAGATCGGAAGAGCGGTTTCAG   |
| chr10 | 76737206  | 76737245  | MYST4_10752 | + | GTGACCTATGCACCAGACGTGATCCACATTTAGTAGAAGTATAAGATGTGGCTTCTAAGATCGGAAGAGCGGTTTCAG      |
| chr10 | 76739108  | 76739147  | MYST4_10753 | + | GTGACCTATGCACCAGACGTAAAGTCTGGCAGGTGATAACTTGAATGTACATATGTGAGAGATCGGAAGAGCGGTTTCAG    |
| chr10 | 76741697  | 76741736  | MYST4_10754 | + | GTGACCTATGCACCAGACGTGTAATAAAAAAATTCAGCTTTTTGAAATCTAGTACTCCTAGATCGGAAGAGCGGTTTCAG    |
| chr10 | 76745010  | 76745049  | MYST4_10755 | + | GTGACCTATGCACCAGACGTAGCCAGCATGACCTTCAATTTCTTTTTCAAATGTTTTGAGATCGGAAGAGCGGTTTCAG     |
| chr10 | 76748881  | 76748920  | MYST4_10756 | + | GTGACCTATGCACCAGACGTTACTTTATTACTTTTCTGATCCAGGAAGCTGATGGCCGTAGATCGGAAGAGCGGTTTCAG    |
| chr10 | 76780582  | 76780621  | MYST4_10757 | + | GTGACCTATGCACCAGACGTGGACCTGGGAGCTCCGTGGCTCAGGCATCCACACCCAGAGATCGGAAGAGCGGTTTCAG     |
| chr10 | 76781054  | 76781093  | MYST4_10758 | + | GTGACCTATGCACCAGACGTTCTTTATCATCTAAGTTGTGTAACCTCAATCTTGTAGCAAGATCGGAAGAGCGGTTTCAG    |
| chr10 | 76782000  | 76782039  | MYST4_10759 | + | GTGACCTATGCACCAGACGTGTTAGATTCTGTGAGTCGGCTTCAATCAAATCTTATAGATCGGAAGAGCGGTTTCAG       |
| chr10 | 76785018  | 76785057  | MYST4_10760 | + | GTGACCTATGCACCAGACGTGAATGATAAAAACCTTACCCTTGAAGATGCTGTATCTGAAGATCGGAAGAGCGGTTTCAG    |
| chr10 | 76790815  | 76790854  | MYST4_10761 | + | GTGACCTATGCACCAGACGTCAGTCCACAAAACCTACGGGGCATCACTATTGGATTGATCAGATCGGAAGAGCGGTTTCAG   |
| chr10 | 76602936  | 76602975  | MYST4_10762 | + | GTGACCTATGCACCAGACGTGAATAAACTTTTAAAGGAGAGCAATTGAAGGACTTGAGGAGAGATCGGAAGAGCGGTTTCAG  |
| chr10 | 76735633  | 76735672  | MYST4_10763 | + | GTGACCTATGCACCAGACGTCCACTTCTTCTCCCTCCTCCAGAGTTCTTCCAGCCAGTGTAGATCGGAAGAGCGGTTTCAG   |
| chr10 | 76789109  | 76789148  | MYST4_10764 | + | GTGACCTATGCACCAGACGTAGAACAGGCCACGAGCAGGACCAAAAAGAACAGCAGGAAAGATCGGAAGAGCGGTTTCAG    |
| chr10 | 76789535  | 76789574  | MYST4_10765 | + | GTGACCTATGCACCAGACGTGATGCCATCAGTTCAGATCATTCAAGCAAGTCTGATACAGATCGGAAGAGCGGTTTCAG     |
| chr10 | 76789961  | 76790000  | MYST4_10766 | + | GTGACCTATGCACCAGACGTCTTATACGAGCGAATGGGTCAGAGTGATTTTTGGGGCTGGGAGATCGGAAGAGCGGTTTCAG  |
| chr10 | 76790387  | 76790426  | MYST4_10767 | + | GTGACCTATGCACCAGACGTGCTGCCACCATCAGTCACAAATCTATGGCGCTCCCAGATCGGAAGAGCGGTTTCAG        |
| chr12 | 78225495  | 78225534  | NAV3_10768  | + | GTGACCTATGCACCAGACGTGAAGTTACTGCAGACTTGTGTAGCTAAAATGCACATTTAGATCGGAAGAGCGGTTTCAG     |
| chr12 | 78334227  | 78334266  | NAV3_10769  | + | GTGACCTATGCACCAGACGTCTTCTGAAAGAAAAGCATGAAAGTCTCTGCTCCCATCTCTAGATCGGAAGAGCGGTTTCAG   |
| chr12 | 78334924  | 78334963  | NAV3_10770  | + | GTGACCTATGCACCAGACGTATTTATTCTCAATATATAATGCTATCTTCACTTCCAGAAGATCGGAAGAGCGGTTTCAG     |
| chr12 | 78362493  | 78362532  | NAV3_10771  | + | GTGACCTATGCACCAGACGTGAAGTAGGGGAATGTGTTTCCAATGATTTGTGTAGATACAAGATCGGAAGAGCGGTTTCAG   |
| chr12 | 78388662  | 78388701  | NAV3_10772  | + | GTGACCTATGCACCAGACGTATTCTCTAATTTATTGCTTATTAGTGATGCAAAATAAATAGATCGGAAGAGCGGTTTCAG    |
| chr12 | 78392267  | 78392306  | NAV3_10773  | + | GTGACCTATGCACCAGACGTGTTACATCATTATGACACAAGTCCAACATGAGTCTTGTGAAGATCGGAAGAGCGGTTTCAG   |
| chr12 | 78401236  | 78401275  | NAV3_10774  | + | GTGACCTATGCACCAGACGTCTCTGTTTTATCCACAGTTGTAATAATATTTACAGGCCCTACAGATCGGAAGAGCGGTTTCAG |
| chr12 | 78415653  | 78415692  | NAV3_10775  | + | GTGACCTATGCACCAGACGTTTCATCGATGCATAGGTCAAACCTAGGAATTTCCGTTACTTAGATCGGAAGAGCGGTTTCAG  |
| chr12 | 78443892  | 78443931  | NAV3_10776  | + | GTGACCTATGCACCAGACGTATTTTGCATATTTGAGCCAAATAAGAAAATAAATACAGATCGGAAGAGCGGTTTCAG       |
| chr12 | 78444938  | 78444977  | NAV3_10777  | + | GTGACCTATGCACCAGACGTCTGTTTCCGTCAGCATTGTGTGAAGAGGGGAGGTGGTCTAGATCGGAAGAGCGGTTTCAG    |
| chr12 | 78452906  | 78452945  | NAV3_10778  | + | GTGACCTATGCACCAGACGTGATGATGATGAGTGAAGTAATTTATAGATCGGAAGAGCGGTTTCAG                  |
| chr12 | 78510695  | 78510734  | NAV3_10779  | + | GTGACCTATGCACCAGACGTCCACCTTTCTTTTTCCAGTGTCTTCCAGCTTTTTCCCCAGATCGGAAGAGCGGTTTCAG     |
| chr12 | 78512088  | 78512127  | NAV3_10780  | + | GTGACCTATGCACCAGACGTGCTTTGGCAGCTGTTATGCAAAAGTGCTTTACTTTATTGTAGATCGGAAGAGCGGTTTCAG   |
| chr12 | 78516219  | 78516258  | NAV3_10781  | + | GTGACCTATGCACCAGACGTCTGGAGCATTGATAACATCTTCCCCTCTTCCCTGCATAGATCGGAAGAGCGGTTTCAG      |
| chr12 | 78520999  | 78521038  | NAV3_10782  | + | GTGACCTATGCACCAGACGTCCTCAGCAGTAATGCTACCTCTCTGTTGATGTAACCTAGATCGGAAGAGCGGTTTCAG      |
| chr12 | 78522657  | 78522696  | NAV3_10783  | + | GTGACCTATGCACCAGACGTCTAAAATATTGATTTTTGTTTTGTTTCTTCCACCACCCTAGATCGGAAGAGCGGTTTCAG    |
| chr12 | 78531156  | 78531195  | NAV3_10784  | + | GTGACCTATGCACCAGACGTAGGGGGATTAAAGATGAAGTCACTTTATTAAACCCTGAGAGATCGGAAGAGCGGTTTCAG    |
| chr12 | 78534125  | 78534164  | NAV3_10785  | + | GTGACCTATGCACCAGACGTGCTGTAAAGAAAAGCTTTGCTTTTTGCCATTGCACACAGAAGATCGGAAGAGCGGTTTCAG   |
| chr12 | 78540183  | 78540222  | NAV3_10786  | + | GTGACCTATGCACCAGACGTAATATGCAATTTTTAATTTTTCTATTTTTGATTGATTAGATCGGAAGAGCGGTTTCAG      |
| chr12 | 78542710  | 78542749  | NAV3_10787  | + | GTGACCTATGCACCAGACGTTCAATTTTTAAAATATATTACAAACAAATTTTTATAGAGAAAAGATCGGAAGAGCGGTTTCAG |
| chr12 | 78553077  | 78553116  | NAV3_10788  | + | GTGACCTATGCACCAGACGTAATTTGCCACTGGAGTAAAAGAAAGACAGCAAATTTGATAGATCGGAAGAGCGGTTTCAG    |



|       |           |           |                |   |                                                                                      |
|-------|-----------|-----------|----------------|---|--------------------------------------------------------------------------------------|
| chr5  | 176639207 | 176639246 | NSD1_10847     | + | GTGACCTATGCACCAGACGTCTAAATGTGATAAAAAAAAAAAAAAATTGGAGAAAAGTGCTGAAGATCGGAAGAGCGGTTTCAG |
| chr5  | 176662957 | 176662996 | NSD1_10848     | + | GTGACCTATGCACCAGACGTAAATTTTCAGCAAACCTTTCACCTGGTCCCTAGGAAACTGCAAAGATCGGAAGAGCGGTTTCAG |
| chr5  | 176665519 | 176665558 | NSD1_10849     | + | GTGACCTATGCACCAGACGTGTTGGGGTCTCAGTATTTGAGCAGATATGATTAGAGGAAGAGATCGGAAGAGCGGTTTCAG    |
| chr5  | 176666877 | 176666916 | NSD1_10850     | + | GTGACCTATGCACCAGACGTTTTGTAAAGTTCTAAAAGAAATAAATCTCAGGAAATGAGAAAAGATCGGAAGAGCGGTTTCAG  |
| chr5  | 176671282 | 176671321 | NSD1_10851     | + | GTGACCTATGCACCAGACGTGTTGAGATTTAAAAACGTAATGCAGTAGTAAGTTTGAAGTAGATCGGAAGAGCGGTTTCAG    |
| chr5  | 176673808 | 176673847 | NSD1_10852     | + | GTGACCTATGCACCAGACGTGTTCTGTACTTTTCACCTTCTAAAGAGAACTACTTTTCAGATCGGAAGAGCGGTTTCAG      |
| chr5  | 176675336 | 176675375 | NSD1_10853     | + | GTGACCTATGCACCAGACGTGTTTGCCCACTTGTTCATTCATGATGTTTCATCTTTAAAGATCGGAAGAGCGGTTTCAG      |
| chr5  | 176678865 | 176678904 | NSD1_10854     | + | GTGACCTATGCACCAGACGTATCGAACGGTCTTCTCCAAAAGAAAGTTTGAATTTAAGAGATCGGAAGAGCGGTTTCAG      |
| chr5  | 176684163 | 176684202 | NSD1_10855     | + | GTGACCTATGCACCAGACGTCTTATGTGGACAGTCTAATGTAAACCTCAGTTTAAATTAGATCGGAAGAGCGGTTTCAG      |
| chr5  | 176687180 | 176687219 | NSD1_10856     | + | GTGACCTATGCACCAGACGTATTTCTTCTCTATTTGTAGTCTAAAAGGGGATTAATCAAGATCGGAAGAGCGGTTTCAG      |
| chr5  | 176694730 | 176694769 | NSD1_10857     | + | GTGACCTATGCACCAGACGTAGAATAGCACTCATCTCTTTTACCATCCTCTGTTTCTTGAAGATCGGAAGAGCGGTTTCAG    |
| chr5  | 176696819 | 176696858 | NSD1_10858     | + | GTGACCTATGCACCAGACGTCTTTTGTGTTCTCAGGCAACACAGACCTCTGTTACCTGAGATCGGAAGAGCGGTTTCAG      |
| chr5  | 176700796 | 176700835 | NSD1_10859     | + | GTGACCTATGCACCAGACGTAAATCTTGGGGACCTCTCTAGAAAGAGAATGGAATAGCTAGATCGGAAGAGCGGTTTCAG     |
| chr5  | 176707846 | 176707885 | NSD1_10860     | + | GTGACCTATGCACCAGACGTGCTAAATACCATACTTCTCCTCTTTGCAGTTGCTTGAGATCGGAAGAGCGGTTTCAG        |
| chr5  | 176709593 | 176709632 | NSD1_10861     | + | GTGACCTATGCACCAGACGTGAAATGCTGTTTTCTACTGTTACAAGATTGTAATTTGTGAGATCGGAAGAGCGGTTTCAG     |
| chr5  | 176710940 | 176710979 | NSD1_10862     | + | GTGACCTATGCACCAGACGTGTTTCAGGATCTGACAGTGCATCTGAATTTTCAGGGCTTTAGATCGGAAGAGCGGTTTCAG    |
| chr5  | 176715937 | 176715976 | NSD1_10863     | + | GTGACCTATGCACCAGACGTCTAGACTTCTGCTTTGGGATTAGTGGTGCGGTCTCCCTAGATCGGAAGAGCGGTTTCAG      |
| chr5  | 176719170 | 176719209 | NSD1_10864     | + | GTGACCTATGCACCAGACGTAAATCCATTTGACCGCTACTGCTTCTCCATCACTAGATCGGAAGAGCGGTTTCAG          |
| chr5  | 176722471 | 176722510 | NSD1_10865     | + | GTGACCTATGCACCAGACGTGTCACATGACAAACAAGCTGCCCCAGGGTACCATTTGAGATCGGAAGAGCGGTTTCAG       |
| chr5  | 176562578 | 176562617 | NSD1_10866     | + | GTGACCTATGCACCAGACGTGTGGACGATGCAGATGTAGATTTGAAATGGACCCAGAAAGATCGGAAGAGCGGTTTCAG      |
| chr5  | 176721250 | 176721289 | NSD1_10867     | + | GTGACCTATGCACCAGACGTATAAGGTGAGAGACCTCGCTGGGTGAGGGACCAAATCCCAGATCGGAAGAGCGGTTTCAG     |
| chr5  | 176721657 | 176721696 | NSD1_10868     | + | GTGACCTATGCACCAGACGTGACAGCCCTGTAGCTAAAGAAAAGCACTGAGGCCCTGTGGAGATCGGAAGAGCGGTTTCAG    |
| chr5  | 176722064 | 176722103 | NSD1_10869     | + | GTGACCTATGCACCAGACGTGACCCAGGCCCTCTAGCCAAATCCCAGGCCCTGGTGAAGATCGGAAGAGCGGTTTCAG       |
| chr5  | 176637074 | 176637113 | NSD1_10870     | + | GTGACCTATGCACCAGACGTACAGGGTCCACACTGCCCCAGAAAGTTTCTGTTTTCTAGATCGGAAGAGCGGTTTCAG       |
| chr5  | 176637501 | 176637540 | NSD1_10871     | + | GTGACCTATGCACCAGACGTAAAGCCTCTCATTAGTAACTCACATACAGACCCTAATGGAGATCGGAAGAGCGGTTTCAG     |
| chr5  | 176637928 | 176637967 | NSD1_10872     | + | GTGACCTATGCACCAGACGTATGAGAAAACAGGGATTCAAGTGACATAGAAACAGCAGTAGATCGGAAGAGCGGTTTCAG     |
| chr5  | 176638355 | 176638394 | NSD1_10873     | + | GTGACCTATGCACCAGACGTGCAATATCTGCGGAGTTGCTGCTTCCCTACCTGGCTTAAGATCGGAAGAGCGGTTTCAG      |
| chr5  | 176638782 | 176638821 | NSD1_10874     | + | GTGACCTATGCACCAGACGTCTTTTTGAAAACGGAAAGGCCAGAGCTGGACTCTGTAAGATCGGAAGAGCGGTTTCAG       |
| chr11 | 117030750 | 117030789 | PAFAH1B2_10875 | + | GTGACCTATGCACCAGACGTAAAGGATGAGCGTGGTTCTTGGCTACTCATGTATATCCATAGATCGGAAGAGCGGTTTCAG    |
| chr11 | 117031988 | 117032027 | PAFAH1B2_10876 | + | GTGACCTATGCACCAGACGTAGTTACTTGTCAATGTCATTAATCTTAAAGTCTGTTTTGGAAGATCGGAAGAGCGGTTTCAG   |
| chr11 | 117034619 | 117034658 | PAFAH1B2_10877 | + | GTGACCTATGCACCAGACGTGTTGGTGGGTAGAGAGTTTGTATCTTTAGGTGAGCTGAGAGATCGGAAGAGCGGTTTCAG     |
| chr11 | 117038426 | 117038465 | PAFAH1B2_10878 | + | GTGACCTATGCACCAGACGTTCAAGTGTAAATGACATCTCAGCTTCCCTCAGATCAGTTCTAAGATCGGAAGAGCGGTTTCAG  |
| chr20 | 9520275   | 9520314   | PAK7_10879     | + | GTGACCTATGCACCAGACGTACACAGATACCAATCTGAGGCAACACAGACACCTAACCAGATCGGAAGAGCGGTTTCAG      |
| chr20 | 9523378   | 9523417   | PAK7_10880     | + | GTGACCTATGCACCAGACGTACCCCTACTGGTTATCTCAGGCAAGGAGAAACATTCTGAAAGATCGGAAGAGCGGTTTCAG    |
| chr20 | 9525152   | 9525191   | PAK7_10881     | + | GTGACCTATGCACCAGACGTAAAGGAATGAAACAACCTGCAATTTTAAAACAATGTCTGCAGATCGGAAGAGCGGTTTCAG    |
| chr20 | 9538392   | 9538431   | PAK7_10882     | + | GTGACCTATGCACCAGACGTAAATAACATTTAAGGAACAAGACAGGTTTAAAGAACATCTTTAGATCGGAAGAGCGGTTTCAG  |
| chr20 | 9543682   | 9543721   | PAK7_10883     | + | GTGACCTATGCACCAGACGTGGGAAATATACTTTGACTTGTGAAGATGAAGTTGCTTTTAGATCGGAAGAGCGGTTTCAG     |
| chr20 | 9547042   | 9547081   | PAK7_10884     | + | GTGACCTATGCACCAGACGTAGACATGGATAGAGAATATTCACATGCTGGATCTGAATGCAGATCGGAAGAGCGGTTTCAG    |
| chr20 | 9561588   | 9561627   | PAK7_10885     | + | GTGACCTATGCACCAGACGTTAGAGGGAATTTGTTTAAAGAAAATTTTCATGGATTTAAGATCGGAAGAGCGGTTTCAG      |
| chr20 | 9624987   | 9625026   | PAK7_10886     | + | GTGACCTATGCACCAGACGTCTGGGAAATATAAATGGAAAAGGACGACCCATTTATATCAGATCGGAAGAGCGGTTTCAG     |
| chr20 | 9561195   | 9561234   | PAK7_10887     | + | GTGACCTATGCACCAGACGTGAAAATCTGGCAAATCGGATTTCAAAGCTTACCTCAGATCGGAAGAGCGGTTTCAG         |
| chr14 | 20811857  | 20811896  | PARP2_10888    | + | GTGACCTATGCACCAGACGTCAATATCGCGGGACGGCATCGCGGGGGCGGGCAGTCAGAAAGATCGGAAGAGCGGTTTCAG    |
| chr14 | 20813257  | 20813296  | PARP2_10889    | + | GTGACCTATGCACCAGACGTAAAGTTCATGGGCCAGCAAAGGGTCTCTGGTAGGAGTGAAGATCGGAAGAGCGGTTTCAG     |
| chr14 | 20813296  | 20813335  | PARP2_10890    | + | GTGACCTATGCACCAGACGTATCTGGGGATGATATCTTGTATTTTCAACTCCTATTTCTAGATCGGAAGAGCGGTTTCAG     |
| chr14 | 20813634  | 20813673  | PARP2_10891    | + | GTGACCTATGCACCAGACGTCTGGAACCGATCTTCCAGTCCATGGATATCTCAGAGACATAGATCGGAAGAGCGGTTTCAG    |
| chr14 | 20815083  | 20815122  | PARP2_10892    | + | GTGACCTATGCACCAGACGTAGAAGAGGTGACCAATATATTTAGACACTTCTTAGATCGGAAGAGCGGTTTCAG           |
| chr14 | 20818792  | 20818831  | PARP2_10893    | + | GTGACCTATGCACCAGACGTTTATGAGATTTTATGAGTTGGCATTAGAAAGTCAGAAAGATCGGAAGAGCGGTTTCAG       |
| chr14 | 20819292  | 20819331  | PARP2_10894    | + | GTGACCTATGCACCAGACGTAAAAGTGACTACAAAAAATATACCCTCCTCTTTCTTAGATAGATCGGAAGAGCGGTTTCAG    |
| chr14 | 20822417  | 20822456  | PARP2_10895    | + | GTGACCTATGCACCAGACGTACATTTTCTCTGCATTCTCTCCTATAATTCCTAGCTCCAGATCGGAAGAGCGGTTTCAG      |
| chr14 | 20823117  | 20823156  | PARP2_10896    | + | GTGACCTATGCACCAGACGTTGCTGTTACTCTCACTTTGTTCTTCTACCTATACATATCCAGATCGGAAGAGCGGTTTCAG    |
| chr14 | 20823985  | 20824024  | PARP2_10897    | + | GTGACCTATGCACCAGACGTTATGATTTGAGACTTATATATCCCTTATACCAGTCTCCATAGATCGGAAGAGCGGTTTCAG    |
| chr14 | 20824201  | 20824240  | PARP2_10898    | + | GTGACCTATGCACCAGACGTGATCATTTATTTTTCATATCTTGCACTTACCTTAACCACCTCAGATCGGAAGAGCGGTTTCAG  |
| chr14 | 20824604  | 20824643  | PARP2_10899    | + | GTGACCTATGCACCAGACGTAGCTTTGCGTGTGGAAAGACACTCCTTGCCCGAAAAGTACAAGATCGGAAGAGCGGTTTCAG   |
| chr14 | 20824859  | 20824898  | PARP2_10900    | + | GTGACCTATGCACCAGACGTTTGAAGTCTGGGAGGACACAGGGGAAAAGGGATACAGTAAAGATCGGAAGAGCGGTTTCAG    |
| chr14 | 20825319  | 20825358  | PARP2_10901    | + | GTGACCTATGCACCAGACGTAGTATGTCTGTGATCTCTAGTTTATTAATCCAGTTTTTAGATCGGAAGAGCGGTTTCAG      |
| chr14 | 20825690  | 20825729  | PARP2_10902    | + | GTGACCTATGCACCAGACGTAGAACCAGGAGGACTAGAAGACTCCTTTTGGCCAGATAAGAGATCGGAAGAGCGGTTTCAG    |
| chr14 | 20825967  | 20826006  | PARP2_10903    | + | GTGACCTATGCACCAGACGTAAATAAACAGAGATCTGATCTTCAAGCAAAGAAATAAGAGATCGGAAGAGCGGTTTCAG      |
| chr17 | 26881524  | 26881563  | PIGS_10904     | + | GTGACCTATGCACCAGACGTGAAGGGACAAAGGGTATACCAGTAAAGTCTTAGGCATTGGAGATCGGAAGAGCGGTTTCAG    |

|       |           |           |                |   |                                                                                       |
|-------|-----------|-----------|----------------|---|---------------------------------------------------------------------------------------|
| chr17 | 26882090  | 26882129  | PIGS_10905     | + | GTGACCTATGCACCAGACGTATCGGAGTAAGATCAAGGTGGCTGAGACCACAAGGGCGGAAGATCGGAAGAGCGGTTTCAG     |
| chr17 | 26883295  | 26883334  | PIGS_10906     | + | GTGACCTATGCACCAGACGTGAATGAGATTGCCACAACATCATAACCAGGCCCTTGCCAGAGATCGGAAGAGCGGTTTCAG     |
| chr17 | 26887220  | 26887259  | PIGS_10907     | + | GTGACCTATGCACCAGACGTAGGAGTCAGGGAAAGTCAGAGGCTCTTTGTGGATCAAAGAAGAGATCGGAAGAGCGGTTTCAG   |
| chr17 | 26888658  | 26888697  | PIGS_10908     | + | GTGACCTATGCACCAGACGTGAGCAAGAGACAGAATGCCATGGCTCAGAAAAGAAAGCCAGATCGGAAGAGCGGTTTCAG      |
| chr17 | 26890551  | 26890590  | PIGS_10909     | + | GTGACCTATGCACCAGACGTGAACAGGTGGTACACCAAGAGCAAAACACCATTCATCTCAGATCGGAAGAGCGGTTTCAG      |
| chr17 | 26890936  | 26890975  | PIGS_10910     | + | GTGACCTATGCACCAGACGTAAAGAAGTAGCAATGAAAGGGCAAGCATCATGCCCTAGATCGGAAGAGCGGTTTCAG         |
| chr17 | 26897992  | 26898031  | PIGS_10911     | + | GTGACCTATGCACCAGACGTGAGCATCAGGGCCGTGAGTCTCCACCTTGCCGGGGGAGATCGGAAGAGCGGTTTCAG         |
| chr17 | 26898217  | 26898256  | PIGS_10912     | + | GTGACCTATGCACCAGACGTGGGGAACCGACTGAGGGCCTGGA AACCGGGCTAGGGTACCGAGATCGGAAGAGCGGTTTCAG   |
| chr17 | 26898525  | 26898564  | PIGS_10913     | + | GTGACCTATGCACCAGACGTGGCTGCTCCGGCCACCGTGGGGGCAGAGCTTCGTGAGCCTAGATCGGAAGAGCGGTTTCAG     |
| chr12 | 133201407 | 133201446 | POLE_10914     | + | GTGACCTATGCACCAGACGTAAACAGGCACAGTGAGACCCAGTCCACTCAGAGAGAGGAGATCGGAAGAGCGGTTTCAG       |
| chr12 | 133201591 | 133201630 | POLE_10915     | + | GTGACCTATGCACCAGACGTGCAGCCCGCTGGGCGCCAGCCCTCCCGCGCTGGCCAGACAGATCGGAAGAGCGGTTTCAG      |
| chr12 | 133202367 | 133202406 | POLE_10916     | + | GTGACCTATGCACCAGACGTCAAGAGTGCAGAGTGCAGGCTCACCAGCCAGCCTCCAGACCACAAGATCGGAAGAGCGGTTTCAG |
| chr12 | 133202914 | 133202953 | POLE_10917     | + | GTGACCTATGCACCAGACGTACAGCCACATCGGGAAGGAGCTCCCGGGGCCCTCCCTGCAGATCGGAAGAGCGGTTTCAG      |
| chr12 | 133209105 | 133209144 | POLE_10918     | + | GTGACCTATGCACCAGACGTAAAGGATGCTGAGGGAGGGGTCTGGGACCTGTCTGGCACTGAGATCGGAAGAGCGGTTTCAG    |
| chr12 | 133209392 | 133209431 | POLE_10919     | + | GTGACCTATGCACCAGACGTGCACACACACCACAGGCCCTGAGTCGGGCTGCTGCAAAACAAGATCGGAAGAGCGGTTTCAG    |
| chr12 | 133210975 | 133211014 | POLE_10920     | + | GTGACCTATGCACCAGACGTGACACAACCGCGGCTGTGTTTGACCATCGCGGCCCTGTAAGATCGGAAGAGCGGTTTCAG      |
| chr12 | 133212621 | 133212660 | POLE_10921     | + | GTGACCTATGCACCAGACGTAGCATTTGAAGACGCTGCTTCAGTGAATCGACCTTGTCTAGATCGGAAGAGCGGTTTCAG      |
| chr12 | 133214736 | 133214775 | POLE_10922     | + | GTGACCTATGCACCAGACGTGAGTAGTGAGATGCCGTGGAGCCACAGTATCGGAGAGAGATCGGAAGAGCGGTTTCAG        |
| chr12 | 133215895 | 133215934 | POLE_10923     | + | GTGACCTATGCACCAGACGTAGGTGCACGACACCCTCGTACCCTCAGCCTCCACCGTGCAGATCGGAAGAGCGGTTTCAG      |
| chr12 | 133218448 | 133218487 | POLE_10924     | + | GTGACCTATGCACCAGACGTAGACGCCATGCTCAGCCAGCATCTGCCAGCTCCAGCACCAGATCGGAAGAGCGGTTTCAG      |
| chr12 | 133218994 | 133219033 | POLE_10925     | + | GTGACCTATGCACCAGACGTGCACAGGTCAGCACCAGGGGCACATCGCCGGGTCCAGAGAGAGATCGGAAGAGCGGTTTCAG    |
| chr12 | 133219326 | 133219365 | POLE_10926     | + | GTGACCTATGCACCAGACGTGCAAAATGGAAGAAAGACCTGGGTGGACCCAGCCTCAAAGATCGGAAGAGCGGTTTCAG       |
| chr12 | 133219593 | 133219632 | POLE_10927     | + | GTGACCTATGCACCAGACGTGCAGGCCACGTCAACCTCCCTCCGTCGGCAGGAGGAGTGGAGATCGGAAGAGCGGTTTCAG     |
| chr12 | 133219927 | 133219966 | POLE_10928     | + | GTGACCTATGCACCAGACGTAAACAAGCCAGCTACCCCAAGATGTGGGAGGCAGGCACAAGATCGGAAGAGCGGTTTCAG      |
| chr12 | 133220157 | 133220196 | POLE_10929     | + | GTGACCTATGCACCAGACGTGGGCAGACAGGCCGGCAAGGGCTGGATGTTGGGGGCTCTAGATCGGAAGAGCGGTTTCAG      |
| chr12 | 133220574 | 133220613 | POLE_10930     | + | GTGACCTATGCACCAGACGTTACGACGATGATCTCGTCACTGGGCGTAAGTGGTAAATGCAGATCGGAAGAGCGGTTTCAG     |
| chr12 | 133225669 | 133225708 | POLE_10931     | + | GTGACCTATGCACCAGACGTACACGGACATACAGCACATCACAGGACACACTGGAACCCAAAGATCGGAAGAGCGGTTTCAG    |
| chr12 | 133226112 | 133226151 | POLE_10932     | + | GTGACCTATGCACCAGACGTTGGTGAGCACAGCCAGTGTGCAAGTGGTGAGATGGGAATGAGATCGGAAGAGCGGTTTCAG     |
| chr12 | 133233855 | 133233894 | POLE_10933     | + | GTGACCTATGCACCAGACGTCCAACCCATCAGAGAGACCCCTGTGCTAATGCACAGAGATCGGAAGAGCGGTTTCAG         |
| chr12 | 133234026 | 133234065 | POLE_10934     | + | GTGACCTATGCACCAGACGTAGGAACCGGCCACAGAAACACAGGTTGGCAGCAGCACAAGAGATCGGAAGAGCGGTTTCAG     |
| chr12 | 133234567 | 133234606 | POLE_10935     | + | GTGACCTATGCACCAGACGTAAAGACAGGCACACAGCTCAGTAACAGTGA AAATCACCCAAAGATCGGAAGAGCGGTTTCAG   |
| chr12 | 133236106 | 133236145 | POLE_10936     | + | GTGACCTATGCACCAGACGTACAATGGGTAA AACACTGCAGAAATCAAGGGGCAGAGTCTAGATCGGAAGAGCGGTTTCAG    |
| chr12 | 133237761 | 133237800 | POLE_10937     | + | GTGACCTATGCACCAGACGTAAAAAAGGCAAGCACAGCAGTGGCAAGGAGCGCTGGGGAAGATCGGAAGAGCGGTTTCAG      |
| chr12 | 133240745 | 133240784 | POLE_10938     | + | GTGACCTATGCACCAGACGTAGAGAGGAGCAAGGTCGTGAGTTCCTCCCTTTCCATTTCCACGATCGGAAGAGCGGTTTCAG    |
| chr12 | 133241059 | 133241098 | POLE_10939     | + | GTGACCTATGCACCAGACGTACCAGAACTGGTGGGCTGGCTGGCTGCCATGCTCCTCCAGGAGATCGGAAGAGCGGTTTCAG    |
| chr12 | 133242047 | 133242086 | POLE_10940     | + | GTGACCTATGCACCAGACGTGTAACATGGAGCACCTCACAGATCTTCCATTTTACATAGATCGGAAGAGCGGTTTCAG        |
| chr12 | 133244245 | 133244284 | POLE_10941     | + | GTGACCTATGCACCAGACGTGGAGATGGGCAGAGCAGGTGGGTGAGATCTCCAGAGCAAGATCGGAAGAGCGGTTTCAG       |
| chr12 | 133245099 | 133245138 | POLE_10942     | + | GTGACCTATGCACCAGACGTGGCAATGGGGGCAAGTTCAAAGGAGGCCACAGACACACCAGATCGGAAGAGCGGTTTCAG      |
| chr12 | 133245334 | 133245373 | POLE_10943     | + | GTGACCTATGCACCAGACGTTGAGAAAGCACTTAGGGCTGGGCAGAGAGAGCTCCGACTCAGATCGGAAGAGCGGTTTCAG     |
| chr12 | 133245536 | 133245575 | POLE_10944     | + | GTGACCTATGCACCAGACGTAGCGAACTCAGTAGAGGCTGGTACCAAAGCTTGCCTCTAGATCGGAAGAGCGGTTTCAG       |
| chr12 | 133248919 | 133248958 | POLE_10945     | + | GTGACCTATGCACCAGACGTGATGAGACGAGGGGTGACAGGGGCAACACACCCACATAAGATCGGAAGAGCGGTTTCAG       |
| chr12 | 133249436 | 133249475 | POLE_10946     | + | GTGACCTATGCACCAGACGTAAACAAAGGCTTCCAGCCAAAAGCAACACCAAAGGCCCTGAAGATCGGAAGAGCGGTTTCAG    |
| chr12 | 133249874 | 133249913 | POLE_10947     | + | GTGACCTATGCACCAGACGTAAAGCCAGAGAGCAGGGCCATCAA AAATCAAGAGCCAGGAGATCGGAAGAGCGGTTTCAG     |
| chr12 | 133250304 | 133250343 | POLE_10948     | + | GTGACCTATGCACCAGACGTAATGAGAAACAGAAAGCCAGGATGATTCTAACATGCAGCCCGAGATCGGAAGAGCGGTTTCAG   |
| chr12 | 133252114 | 133252153 | POLE_10949     | + | GTGACCTATGCACCAGACGTAAAGAGGAGAGAGCAAGCAAGTGGCAGGTCAGGCTCTAATGAGATCGGAAGAGCGGTTTCAG    |
| chr12 | 133252417 | 133252456 | POLE_10950     | + | GTGACCTATGCACCAGACGTGTCACAGACGTGTCAGAGGCTGTCCCTTCTTCTCAAGCAGATCGGAAGAGCGGTTTCAG       |
| chr12 | 133252801 | 133252840 | POLE_10951     | + | GTGACCTATGCACCAGACGTTTCATTAGCAATCAGCACAAAGTCAGAGGCTGCAAAGCCAAAGATCGGAAGAGCGGTTTCAG    |
| chr12 | 133253250 | 133253289 | POLE_10952     | + | GTGACCTATGCACCAGACGTAAATAAGCATAAAGCCAAGCTCTAACTCCCATTAGGCAGATCGGAAGAGCGGTTTCAG        |
| chr12 | 133254040 | 133254079 | POLE_10953     | + | GTGACCTATGCACCAGACGTACAGTGTGCTAACTAGAGTTCATATCCAGGAAAGTCTAAGATCGGAAGAGCGGTTTCAG       |
| chr12 | 133254316 | 133254355 | POLE_10954     | + | GTGACCTATGCACCAGACGTACAAGAGAGCAACTAACTCAGCTGCCAGGGTCTGGAGGAGAGATCGGAAGAGCGGTTTCAG     |
| chr12 | 133256248 | 133256287 | POLE_10955     | + | GTGACCTATGCACCAGACGTAAGAGATCACGCTCATTTGTTCAAGAGAAATAGGACTTTAAGATCGGAAGAGCGGTTTCAG     |
| chr12 | 133256643 | 133256682 | POLE_10956     | + | GTGACCTATGCACCAGACGTGACAATGAAAGGGCTTTCATTGGTAAATACATTTCTAGATCGGAAGAGCGGTTTCAG         |
| chr12 | 133256819 | 133256858 | POLE_10957     | + | GTGACCTATGCACCAGACGTTCAACCAACCCATCCAGGGGTGATGAGAAAGAAGAAAGCGAAGATCGGAAGAGCGGTTTCAG    |
| chr12 | 133257284 | 133257323 | POLE_10958     | + | GTGACCTATGCACCAGACGTATCAGTCAACACAGACACAAGACCATCTCTACACAGTAAAGATCGGAAGAGCGGTTTCAG      |
| chr12 | 133257876 | 133257915 | POLE_10959     | + | GTGACCTATGCACCAGACGTGAAGGGAAACCCGCTGCTTAATTTGTAATGCCACTGCTGCAGATCGGAAGAGCGGTTTCAG     |
| chr12 | 133263912 | 133263951 | POLE_10960     | + | GTGACCTATGCACCAGACGTGCTACCACCTCTGCTTCAGGGGAGAAATTTGGCCGCTCCAGATCGGAAGAGCGGTTTCAG      |
| chr19 | 45883497  | 45883536  | PPP1R13L_10961 | + | GTGACCTATGCACCAGACGTACAGGATCTTCAGACATCGAGAGCTCCCACTCCATCAGATCGGAAGAGCGGTTTCAG         |
| chr19 | 45885995  | 45886034  | PPP1R13L_10962 | + | GTGACCTATGCACCAGACGTCCACGGAGGGGAAGGTGAGAGCCTGGCCAGGGGTCCAGAGATCGGAAGAGCGGTTTCAG       |

|       |           |           |                |   |                                                                                      |
|-------|-----------|-----------|----------------|---|--------------------------------------------------------------------------------------|
| chr19 | 45888997  | 45889036  | PPP1R13L_10963 | + | GTGACCTATGCACCAGACGTGGTGGGGGTTGCGGGGAACGATCGCTGAGAGGCTCGCCAGATCGGAAGAGCGGTTTCAG      |
| chr19 | 45889226  | 45889265  | PPP1R13L_10964 | + | GTGACCTATGCACCAGACGTCGGGGGAGGGGGAAGACTCAGTCCCGCGGCTGGCATCTGCAGATCGGAAGAGCGGTTTCAG    |
| chr19 | 45895609  | 45895648  | PPP1R13L_10965 | + | GTGACCTATGCACCAGACGTCAAGAGCCCATCAGAGGACAGGTCGCCAGGAGACCCAAAGATCGGAAGAGCGGTTTCAG      |
| chr19 | 45899528  | 45899567  | PPP1R13L_10966 | + | GTGACCTATGCACCAGACGTGGAATCATTAGGGTCTGTGGGGCTGCCTCTCCTCCGGGTCAGATCGGAAGAGCGGTTTCAG    |
| chr19 | 45899705  | 45899744  | PPP1R13L_10967 | + | GTGACCTATGCACCAGACGTGTTTCCAGGGAGGATGAGACGGGAGGGGTGGCGAGCCCCGAGATCGGAAGAGCGGTTTCAG    |
| chr19 | 45900327  | 45900366  | PPP1R13L_10968 | + | GTGACCTATGCACCAGACGTGCCAGGGCTGTAGGGATGGATCAAAGGAGACATTAGTGGAGATCGGAAGAGCGGTTTCAG     |
| chr19 | 45901416  | 45901455  | PPP1R13L_10969 | + | GTGACCTATGCACCAGACGTGGAGTGGAGTGGAGTGAAGGACCTGGCCCTCTGGCAGGGCCGGAGATCGGAAGAGCGGTTTCAG |
| chr19 | 45901587  | 45901626  | PPP1R13L_10970 | + | GTGACCTATGCACCAGACGTGGAGCGGGCGCCTGCATGGTGGGGAGGGAGGGAGCTGGCTAGATCGGAAGAGCGGTTTCAG    |
| chr19 | 45900070  | 45900109  | PPP1R13L_10971 | + | GTGACCTATGCACCAGACGTGCCATCGAAGGCGCGGGGCCGGGGCGAGGTGCGCGGTCAGATCGGAAGAGCGGTTTCAG      |
| chr8  | 30643834  | 30643873  | PPP2CB_10972   | + | GTGACCTATGCACCAGACGTCAAAAAAGGAAGCAATAAAGGATCTGACTTTTGCAAAGAAAGATCGGAAGAGCGGTTTCAG    |
| chr8  | 30648842  | 30648881  | PPP2CB_10973   | + | GTGACCTATGCACCAGACGTAAAAAAATTTCATTTTTCATTATAATATTATGATTTTGAAGATCGGAAGAGCGGTTTCAG     |
| chr8  | 30651605  | 30651644  | PPP2CB_10974   | + | GTGACCTATGCACCAGACGTAAAAAAGTACATGTACAATATTATCAGTCATACCTTTAGATCGGAAGAGCGGTTTCAG       |
| chr8  | 30651808  | 30651847  | PPP2CB_10975   | + | GTGACCTATGCACCAGACGTTTAAACAAAAGAGAATGTATTTGTGTTTTACTAATCCAAAACAGATCGGAAGAGCGGTTTCAG  |
| chr8  | 30655281  | 30655320  | PPP2CB_10976   | + | GTGACCTATGCACCAGACGTAGGAGTAAACCCATAGTAAAAATCACATTTTTACTAGTGTAGATCGGAAGAGCGGTTTCAG    |
| chr8  | 30657282  | 30657321  | PPP2CB_10977   | + | GTGACCTATGCACCAGACGTAGTAAAATCAACAATTACAAGTAAAAACTATCATTTCTTAGATCGGAAGAGCGGTTTCAG     |
| chr5  | 145969800 | 145969839 | PPP2R2B_10978  | + | GTGACCTATGCACCAGACGTGAGAGCAAAAGCAATGACATATCTTCACTGTCTTTTCTTTAGATCGGAAGAGCGGTTTCAG    |
| chr5  | 145972636 | 145972675 | PPP2R2B_10979  | + | GTGACCTATGCACCAGACGTAAACATCGAGAAGGTCAGTTATTTTAAACAGTAATAGATCGGAAGAGCGGTTTCAG         |
| chr5  | 145980034 | 145980073 | PPP2R2B_10980  | + | GTGACCTATGCACCAGACGTAAAGCAAAAGGCAAAATTTAATCTTCAACTCCATCACTGAAGATCGGAAGAGCGGTTTCAG    |
| chr5  | 146017989 | 146018028 | PPP2R2B_10981  | + | GTGACCTATGCACCAGACGTGAGTCAAGGAAGGAACAGGAGAAGGAGGAGGAGCACTTGTAGATCGGAAGAGCGGTTTCAG    |
| chr5  | 146030298 | 146030337 | PPP2R2B_10982  | + | GTGACCTATGCACCAGACGTAGAGAAACAATCATTTCAGAACCAAGATCTTCCATAGGAGATCGGAAGAGCGGTTTCAG      |
| chr5  | 146070814 | 146070853 | PPP2R2B_10983  | + | GTGACCTATGCACCAGACGTCAACCAGATTAAAGTCAGAATTATAGTGAAGCAAGCTCAAGATCGGAAGAGCGGTTTCAG     |
| chr5  | 146077718 | 146077757 | PPP2R2B_10984  | + | GTGACCTATGCACCAGACGTGGAATAACACAACAGATTAATCACAAGTACCAACTAGATCGGAAGAGCGGTTTCAG         |
| chr5  | 146080716 | 146080755 | PPP2R2B_10985  | + | GTGACCTATGCACCAGACGTGAAGCAAAAGGCAATTAAGTAACTGCACACTTACTTTGAAGATCGGAAGAGCGGTTTCAG     |
| chr5  | 146236109 | 146236148 | PPP2R2B_10986  | + | GTGACCTATGCACCAGACGTGGGCCAATTCTGCTGTGGTTCCTCCCTTAGATCGGAAGAGCGGTTTCAG                |
| chr5  | 146257645 | 146257684 | PPP2R2B_10987  | + | GTGACCTATGCACCAGACGTCTTACTTGTGCGTGGGAACAGAGCCGGCAGACAAGTATCCAGATCGGAAGAGCGGTTTCAG    |
| chr1  | 45288352  | 45288391  | PTCH2_10988    | + | GTGACCTATGCACCAGACGTACACCAGCCCCAGTAAAGCCACGGGCCCTGGGGCTCCCAGATCGGAAGAGCGGTTTCAG      |
| chr1  | 45288851  | 45288890  | PTCH2_10989    | + | GTGACCTATGCACCAGACGTGGTGTGGGGGAGTCAGCCCAGGCCTGTCTGTGAGCCTGCAGATCGGAAGAGCGGTTTCAG     |
| chr1  | 45289068  | 45289107  | PTCH2_10990    | + | GTGACCTATGCACCAGACGTAGAGTGGTCTGGAGCTCTCCTCTGCCAGTCATGGCCAGAGATCGGAAGAGCGGTTTCAG      |
| chr1  | 45292070  | 45292109  | PTCH2_10991    | + | GTGACCTATGCACCAGACGTGAGGCTCACAGGGCTCCTGCCAGGAGGATGACAGCCAGATCGGAAGAGCGGTTTCAG        |
| chr1  | 45292765  | 45292804  | PTCH2_10992    | + | GTGACCTATGCACCAGACGTAGAGAGGGCTGAAGGCCCTGGGCCAGGAGGCTGCAGCCAGATCGGAAGAGCGGTTTCAG      |
| chr1  | 45292992  | 45293031  | PTCH2_10993    | + | GTGACCTATGCACCAGACGTCCAGGATAGGGTTCTATTAGCTGGTGGCCCCAGGGCTTTAGATCGGAAGAGCGGTTTCAG     |
| chr1  | 45293397  | 45293436  | PTCH2_10994    | + | GTGACCTATGCACCAGACGTAGCAACTAAGCTGGAGACCCAGGGCTGCCCCAGCCAGATCGGAAGAGCGGTTTCAG         |
| chr1  | 45293874  | 45293913  | PTCH2_10995    | + | GTGACCTATGCACCAGACGTTAGAGAGTGGATGACAGGCTGTGCTTGAATGCTGGTGTAGATCGGAAGAGCGGTTTCAG      |
| chr1  | 45294097  | 45294136  | PTCH2_10996    | + | GTGACCTATGCACCAGACGTGACAGGAGGGGAATGAAGCTGGTCTGAGATCGGAAGAGCGGTTTCAG                  |
| chr1  | 45294314  | 45294353  | PTCH2_10997    | + | GTGACCTATGCACCAGACGTAGAGTGGGGCTGCCCTCAGGTCACAAAGGGAGGGCCGTAGATCGGAAGAGCGGTTTCAG      |
| chr1  | 45294757  | 45294796  | PTCH2_10998    | + | GTGACCTATGCACCAGACGTAGAGGAGCGGGCAGCTGAGGACCCGTGAAGCCTGGTACTAGATCGGAAGAGCGGTTTCAG     |
| chr1  | 45294995  | 45295034  | PTCH2_10999    | + | GTGACCTATGCACCAGACGTAAAGGGCAGTCTCAGGGCTCCCAGGGTGGGCACTGGTTGATCGGAAGAGCGGTTTCAG       |
| chr1  | 45295216  | 45295255  | PTCH2_11000    | + | GTGACCTATGCACCAGACGTAGGGTGGATAGGAGGGGGCAGGAGGAGGGAATGCCCTCAGAGATCGGAAGAGCGGTTTCAG    |
| chr1  | 45295444  | 45295483  | PTCH2_11001    | + | GTGACCTATGCACCAGACGTTGTGGGAGAACCAGGGGTGAGAGCTGGCCCAACACTGGAGATCGGAAGAGCGGTTTCAG      |
| chr1  | 45295713  | 45295752  | PTCH2_11002    | + | GTGACCTATGCACCAGACGTACAGGAGGGTTAATGCTCAAGGCCCTGGCCGTGGATAACAGATCGGAAGAGCGGTTTCAG     |
| chr1  | 45296726  | 45296765  | PTCH2_11003    | + | GTGACCTATGCACCAGACGTAGCCTATAGTTGGTGGGTCAGGAGCAAAAACCCAGCTAGATCGGAAGAGCGGTTTCAG       |
| chr1  | 45297480  | 45297519  | PTCH2_11004    | + | GTGACCTATGCACCAGACGTTACCCCGGGCCACGTGAGTCTGCCCAACAACCTTTGTAGATCGGAAGAGCGGTTTCAG       |
| chr1  | 45297727  | 45297766  | PTCH2_11005    | + | GTGACCTATGCACCAGACGTGAGGGGCATAGGAGATCAGCAGAAGAAGGGATTCCCACTAGATCGGAAGAGCGGTTTCAG     |
| chr1  | 45298024  | 45298063  | PTCH2_11006    | + | GTGACCTATGCACCAGACGTAAACAGAGAAAGCTGGGGGGAAAGGGCCTAGGCGGGTCAAGATCGGAAGAGCGGTTTCAG     |
| chr1  | 45307762  | 45307761  | PTCH2_11007    | + | GTGACCTATGCACCAGACGTAAAGAAAGGTCAGCCAGGCATCTGCCAACAATGCATGAAGATCGGAAGAGCGGTTTCAG      |
| chr1  | 45308615  | 45308654  | PTCH2_11008    | + | GTGACCTATGCACCAGACGTATGGGGCCGCGGGCCGCCCAACCCGCTTATCTGGCCGAGATCGGAAGAGCGGTTTCAG       |
| chr8  | 141675107 | 141675146 | PTK2_11009     | + | GTGACCTATGCACCAGACGTAGAATCACAAACAAATTTAGAACACACACAAGGATTTTTAGATCGGAAGAGCGGTTTCAG     |
| chr8  | 141678534 | 141678573 | PTK2_11010     | + | GTGACCTATGCACCAGACGTAGAAGCCAGTCATTTTTCTGCTCTCCAGCAGATGGCTGAAGATCGGAAGAGCGGTTTCAG     |
| chr8  | 141684514 | 141684553 | PTK2_11011     | + | GTGACCTATGCACCAGACGTAGAATGATTCCCAATTAAGTCATGTGCGTTAAGAAAGATTAAGATCGGAAGAGCGGTTTCAG   |
| chr8  | 141685609 | 141685648 | PTK2_11012     | + | GTGACCTATGCACCAGACGTAGAAAAGTTCAGTCAATGCACCTGGTATATACACTTGGGCAAGATCGGAAGAGCGGTTTCAG   |
| chr8  | 141696804 | 141696843 | PTK2_11013     | + | GTGACCTATGCACCAGACGTAAAAACAAAATCAAAATTTTCATTTTATTGAAAAATAGATCGGAAGAGCGGTTTCAG        |
| chr8  | 141711132 | 141711171 | PTK2_11014     | + | GTGACCTATGCACCAGACGTGTTGAAAACAGCATATTAGCTCTCAATAGTCTATTTCATAGATCGGAAGAGCGGTTTCAG     |
| chr8  | 141712817 | 141712856 | PTK2_11015     | + | GTGACCTATGCACCAGACGTGTAAGGAGGCAAGGTAATGTTCAACTATAACATCTGCACAAGATCGGAAGAGCGGTTTCAG    |
| chr8  | 141716315 | 141716354 | PTK2_11016     | + | GTGACCTATGCACCAGACGTAAAGAGACATCATATGAATGAACCTTTTGATTTTGACAAAAGATCGGAAGAGCGGTTTCAG    |
| chr8  | 141727819 | 141727858 | PTK2_11017     | + | GTGACCTATGCACCAGACGTAAACACATTTGCTTAGGGGAGCTGACAACCAGAGTTAGCAAGATCGGAAGAGCGGTTTCAG    |
| chr8  | 141745565 | 141745604 | PTK2_11018     | + | GTGACCTATGCACCAGACGTGGAATGAAAACACAACAGTGCATGATGAAGAATTAAGATCGGAAGAGCGGTTTCAG         |
| chr8  | 141749217 | 141749256 | PTK2_11019     | + | GTGACCTATGCACCAGACGTAATTTTAGAAAATAAATTTCCCTGTTGTTTATGCTTAAAGAAAGATCGGAAGAGCGGTTTCAG  |
| chr8  | 141753440 | 141753479 | PTK2_11020     | + | GTGACCTATGCACCAGACGTAGAATTTAGACAAATAAGACTTAAATAAAGAAAACAAAACAGATCGGAAGAGCGGTTTCAG    |

|       |           |           |               |   |                                                                                     |
|-------|-----------|-----------|---------------|---|-------------------------------------------------------------------------------------|
| chr8  | 141754877 | 141754916 | PTK2_11021    | + | GTGACCTATGCACCAGACGTAATGACCAAAAAGAAAAAAGAAATAGTGCCAAGATCGGAAGAGCGGTTTCAG            |
| chr8  | 141762426 | 141762465 | PTK2_11022    | + | GTGACCTATGCACCAGACGTGAAATTATAGAATCACACACATGCACAAAAGGTTTTGCTAAGATCGGAAGAGCGGTTTCAG   |
| chr8  | 141771372 | 141771411 | PTK2_11023    | + | GTGACCTATGCACCAGACGTAAATTCACACATCAATACTTAAGTAAAATATTCCAAATGTAGATCGGAAGAGCGGTTTCAG   |
| chr8  | 141774400 | 141774439 | PTK2_11024    | + | GTGACCTATGCACCAGACGTAGAAAACAGATATGTTGAAAGAGGTTAAACATCTGACCTCCAGATCGGAAGAGCGGTTTCAG  |
| chr8  | 141799636 | 141799675 | PTK2_11025    | + | GTGACCTATGCACCAGACGTCAAGAGCAAAAGCTGTAAGCCCTGCAATTTCCCCAGGACCCAGATCGGAAGAGCGGTTTCAG  |
| chr8  | 141803494 | 141803533 | PTK2_11026    | + | GTGACCTATGCACCAGACGTAAAGAAAAGAGATGCATAAGGCTCTTTTCACTCCTTTTGAAGATCGGAAGAGCGGTTTCAG   |
| chr8  | 141810686 | 141810725 | PTK2_11027    | + | GTGACCTATGCACCAGACGTAAAAGATAAAGAACAGACTTCATTGTTCTTCCCAGTAAGAGATCGGAAGAGCGGTTTCAG    |
| chr8  | 141813760 | 141813799 | PTK2_11028    | + | GTGACCTATGCACCAGACGTGAAAGGTAAAATCTTTGACTACTCGGATAAAAACTCATTTAGATCGGAAGAGCGGTTTCAG   |
| chr8  | 141828464 | 141828503 | PTK2_11029    | + | GTGACCTATGCACCAGACGTTGAAACAAGTGAGAACAGAGGTGGCAGAAGGAAAAAGAAAGATCGGAAGAGCGGTTTCAG    |
| chr8  | 141829130 | 141829169 | PTK2_11030    | + | GTGACCTATGCACCAGACGTAAATTACCAAAACATCTTGTAAAATACAGCAATGAGTAAAAGATCGGAAGAGCGGTTTCAG   |
| chr8  | 141840636 | 141840675 | PTK2_11031    | + | GTGACCTATGCACCAGACGTAAAAGAAAGCGTATTAACAAATAACACCACCAATCAATTAAGATCGGAAGAGCGGTTTCAG   |
| chr8  | 141856432 | 141856471 | PTK2_11032    | + | GTGACCTATGCACCAGACGTGGAAGACATACATTTATATGTATATAAGGAATGTTTGTAGATCGGAAGAGCGGTTTCAG     |
| chr8  | 141856788 | 141856827 | PTK2_11033    | + | GTGACCTATGCACCAGACGTAGGAATGGGAAAAACAGCAACTGTTTTAAAAGAAAAATATTAGATCGGAAGAGCGGTTTCAG  |
| chr8  | 141874509 | 141874548 | PTK2_11034    | + | GTGACCTATGCACCAGACGTTTCAAAAACAGAACAAATTAGAAATCAGTCATTTTCTCAAAGATCGGAAGAGCGGTTTCAG   |
| chr8  | 141900847 | 141900886 | PTK2_11035    | + | GTGACCTATGCACCAGACGTGATGCTAGGTATCTGTCAATTTCTGTAAAAGAACAATAAGATCGGAAGAGCGGTTTCAG     |
| chr9  | 8317953   | 8317992   | PTPRD_11036   | + | GTGACCTATGCACCAGACGTCAATGAATGGGGAGAAAGCAAAAAGAGGGACCATGAGCATAAAGATCGGAAGAGCGGTTTCAG |
| chr9  | 8319977   | 8320016   | PTPRD_11037   | + | GTGACCTATGCACCAGACGTAAACAAGCGGATGTTACTGGGTGAGATGTTACAGCTCTTGAGATCGGAAGAGCGGTTTCAG   |
| chr9  | 8331747   | 8331786   | PTPRD_11038   | + | GTGACCTATGCACCAGACGTAGAAGTGGGAAACACCTCCGCCCGCAAAAGAGAGCGGAGGAAAGATCGGAAGAGCGGTTTCAG |
| chr9  | 8339058   | 8339097   | PTPRD_11039   | + | GTGACCTATGCACCAGACGTAAAGATTAATGTTAAACTATGCAAAAGTATAAAGAACATTAGATCGGAAGAGCGGTTTCAG   |
| chr9  | 8340480   | 8340519   | PTPRD_11040   | + | GTGACCTATGCACCAGACGTGAGAATGAAAAGAAATGTGTTAAAGTATTTAGAGAACATGCAGATCGGAAGAGCGGTTTCAG  |
| chr9  | 8341279   | 8341318   | PTPRD_11041   | + | GTGACCTATGCACCAGACGTGGAIAAAAAAAAAAAGAAAAACCAACAAGATCATTTTCAGATCGGAAGAGCGGTTTCAG     |
| chr9  | 8341989   | 8342028   | PTPRD_11042   | + | GTGACCTATGCACCAGACGTAAATAGAGAAGAAAAGCCCAATAAACCTATCAGAAAAATCAAGATCGGAAGAGCGGTTTCAG  |
| chr9  | 8376101   | 8376140   | PTPRD_11043   | + | GTGACCTATGCACCAGACGTGGAATATCAGTCGAAATCTGTTTTCCAGCCTCAGGTGGAGATCGGAAGAGCGGTTTCAG     |
| chr9  | 8376737   | 8376776   | PTPRD_11044   | + | GTGACCTATGCACCAGACGTCAAGTGCACACTCAGGGCAACTGCTCATCAATTTCTCTAAGATCGGAAGAGCGGTTTCAG    |
| chr9  | 8389418   | 8389457   | PTPRD_11045   | + | GTGACCTATGCACCAGACGTAGGAGTGTTATTCAACCAGGTGAGCACATCACAAAGAGGAAAGATCGGAAGAGCGGTTTCAG  |
| chr9  | 8404671   | 8404710   | PTPRD_11046   | + | GTGACCTATGCACCAGACGTAAAACAACATATACACAAAATCAATACTGAAAACCACAGATCGGAAGAGCGGTTTCAG      |
| chr9  | 8436700   | 8436739   | PTPRD_11047   | + | GTGACCTATGCACCAGACGTAAAGCAAAGAAACACATTTGAAAACAAATGAAAATGATAGATCGGAAGAGCGGTTTCAG     |
| chr9  | 8449848   | 8449887   | PTPRD_11048   | + | GTGACCTATGCACCAGACGTAAAATAGAAATTTAAGAAGAAAAGAAAATCAATTGAAACAGATCGGAAGAGCGGTTTCAG    |
| chr9  | 8460582   | 8460621   | PTPRD_11049   | + | GTGACCTATGCACCAGACGTGCAGAGTCTATTTCAAGTATAAAATAATGACTTTCTAGATAGATCGGAAGAGCGGTTTCAG   |
| chr9  | 8465686   | 8465725   | PTPRD_11050   | + | GTGACCTATGCACCAGACGTAAAAGTGGGAAACAGAAAAGCAACTGTAATAATAAACCAGAGATCGGAAGAGCGGTTTCAG   |
| chr9  | 8471096   | 8471135   | PTPRD_11051   | + | GTGACCTATGCACCAGACGTATGAATAGATAAAAGTTAGGTTAGTTGAAAGGAGGAAAACAGATCGGAAGAGCGGTTTCAG   |
| chr9  | 8484389   | 8484428   | PTPRD_11052   | + | GTGACCTATGCACCAGACGTAAAACCAATAAAAAAAAAAATCTGGTTATCAGAGAGGCAAAAGATCGGAAGAGCGGTTTCAG  |
| chr9  | 8485335   | 8485374   | PTPRD_11053   | + | GTGACCTATGCACCAGACGTAGGAAAAACAGTGTATTTAAACTATTCTTAAAAACAGATGAAGATCGGAAGAGCGGTTTCAG  |
| chr9  | 8486360   | 8486399   | PTPRD_11054   | + | GTGACCTATGCACCAGACGTGGGATGGAGTGTAAGCAACCACTGAACTGTTTACAAGATCGGAAGAGCGGTTTCAG        |
| chr9  | 8492990   | 8493029   | PTPRD_11055   | + | GTGACCTATGCACCAGACGTAAAATAGAAATGCTGATTCAAAACATGCTACTAATGCTAGATCGGAAGAGCGGTTTCAG     |
| chr9  | 8497279   | 8497318   | PTPRD_11056   | + | GTGACCTATGCACCAGACGTATAAGAAGGTTGGGAGGAAAACAAAATAAAAAAGAAAGATCGGAAGAGCGGTTTCAG       |
| chr9  | 8499851   | 8499890   | PTPRD_11057   | + | GTGACCTATGCACCAGACGTATCATTGGATAAAAGAAATATAGGCACCTGTCCACCCTAGATCGGAAGAGCGGTTTCAG     |
| chr9  | 8501070   | 8501109   | PTPRD_11058   | + | GTGACCTATGCACCAGACGTGATGAGTTAAAGGAGGATTTAAGTGAAGGACAGGAGTGAAGATCGGAAGAGCGGTTTCAG    |
| chr9  | 8504416   | 8504455   | PTPRD_11059   | + | GTGACCTATGCACCAGACGTAAAGAGAATGTGGTCATCTTCAATTAAGGTTTCAATGAAATAGATCGGAAGAGCGGTTTCAG  |
| chr9  | 8507445   | 8507484   | PTPRD_11060   | + | GTGACCTATGCACCAGACGTGGAGGCAATGATGAACTCACAAATCACCAGGATGATCAAGATCGGAAGAGCGGTTTCAG     |
| chr9  | 8518440   | 8518479   | PTPRD_11061   | + | GTGACCTATGCACCAGACGTGGAAGATAAAAGACAAATGAACTACCCATCATCCCTATAATAAGATCGGAAGAGCGGTTTCAG |
| chr9  | 8521557   | 8521596   | PTPRD_11062   | + | GTGACCTATGCACCAGACGTACACAAGGGAAATGATAACATATACAAGGCAAGAAAAAGTAGATCGGAAGAGCGGTTTCAG   |
| chr9  | 8523535   | 8523574   | PTPRD_11063   | + | GTGACCTATGCACCAGACGTGAGGGGTTTGTGATCGAGAACAATGAAATGAGGAAAGGAAAGATCGGAAGAGCGGTTTCAG   |
| chr9  | 8525046   | 8525085   | PTPRD_11064   | + | GTGACCTATGCACCAGACGTATAAAATATATTGCCAAAGAGATGATCAGAGAAGGCTTTTCAGATCGGAAGAGCGGTTTCAG  |
| chr9  | 8526655   | 8526694   | PTPRD_11065   | + | GTGACCTATGCACCAGACGTAAATGAATGCAAAATAAGATTAGAAAAGAAAGCATTAGTAGATCGGAAGAGCGGTTTCAG    |
| chr9  | 8527364   | 8527403   | PTPRD_11066   | + | GTGACCTATGCACCAGACGTAAAATCAGAGAGAAAGACAGCAATAAAAAATATTATAGATCGGAAGAGCGGTTTCAG       |
| chr9  | 8528790   | 8528829   | PTPRD_11067   | + | GTGACCTATGCACCAGACGTAAAGGTGATAGAAAACATTAGTTAATAAGTCAGATGCTCCAGATCGGAAGAGCGGTTTCAG   |
| chr9  | 8633469   | 8633508   | PTPRD_11068   | + | GTGACCTATGCACCAGACGTAAACAATAGCTGTCACAGGTGTTGTTACAATTGTCTACCTAGATCGGAAGAGCGGTTTCAG   |
| chr9  | 8636855   | 8636894   | PTPRD_11069   | + | GTGACCTATGCACCAGACGTAAAATAACATCACAGTTAAATTGAAAACGAAATACAGACAGATCGGAAGAGCGGTTTCAG    |
| chr9  | 8733854   | 8733893   | PTPRD_11070   | + | GTGACCTATGCACCAGACGTGGCAGCAGCGTGCAGCAGCAGCTTGAATCACTGCCTCCGAGATCGGAAGAGCGGTTTCAG    |
| chr9  | 8486066   | 8486105   | PTPRD_11071   | + | GTGACCTATGCACCAGACGTACTTCTGGAATGAAATCTCTTCCATCTCCTCCAGATCGGAAGAGCGGTTTCAG           |
| chr9  | 8518149   | 8518188   | PTPRD_11072   | + | GTGACCTATGCACCAGACGTCTCTGAGGTTGTTGTCACAGGTTGCTGGAGGCCCCAGATCGGAAGAGCGGTTTCAG        |
| chr14 | 68290355  | 68290394  | RAD51L1_11073 | + | GTGACCTATGCACCAGACGTTTTAACATTTTTATTGATAAGTTTTATGCACAAGTTAACTAGATCGGAAGAGCGGTTTCAG   |
| chr14 | 68292305  | 68292344  | RAD51L1_11074 | + | GTGACCTATGCACCAGACGTATTTTATTATGATTTGATTATGAATGATTCTCATCTCATAGATCGGAAGAGCGGTTTCAG    |
| chr14 | 68301924  | 68301963  | RAD51L1_11075 | + | GTGACCTATGCACCAGACGTAAATTTTTCGTACCTTCTTCCATTGACCTATAACCTTCAGAAGATCGGAAGAGCGGTTTCAG  |
| chr14 | 68331867  | 68331906  | RAD51L1_11076 | + | GTGACCTATGCACCAGACGTTATTTTTCTATTATAATGTTTTACTTTTTGTAACCTATATAAGATCGGAAGAGCGGTTTCAG  |
| chr14 | 68352716  | 68352755  | RAD51L1_11077 | + | GTGACCTATGCACCAGACGTTTAGATTTTTAGTTTTAGTAAGTGGCTGAAAGGTTTATGTAGATCGGAAGAGCGGTTTCAG   |
| chr14 | 68758708  | 68758747  | RAD51L1_11078 | + | GTGACCTATGCACCAGACGTGTGCTGGAGAGGCTGAAACTTGACACTGACATAGAGCCAGATCGGAAGAGCGGTTTCAG     |

|       |           |           |               |   |                                                                                      |
|-------|-----------|-----------|---------------|---|--------------------------------------------------------------------------------------|
| chr14 | 68878255  | 68878294  | RAD51L1_11079 | + | GTGACCTATGCACCAGACGTTGACAGTATTCTCTGACTATGAAGGTCGGGGAATGAGATAAGATCGGAAGAGCGGTTTCAG    |
| chr14 | 68934978  | 68935017  | RAD51L1_11080 | + | GTGACCTATGCACCAGACGTTGGATTAAAGCCATTTCTTTAAAGCTTATGCTCAGTGCTGCCAGATCGGAAGAGCGGTTTCAG  |
| chr7  | 151164308 | 151164347 | RHEB_11081    | + | GTGACCTATGCACCAGACGTAAGAACCACCAATCACAGTGTTAGTGTGAAGCCGAACCCAGATCGGAAGAGCGGTTTCAG     |
| chr7  | 151167749 | 151167788 | RHEB_11082    | + | GTGACCTATGCACCAGACGTAATAAAAATTTAGTTAAAGTACTTTTGCTCTTCATTATATAAGATCGGAAGAGCGGTTTCAG   |
| chr7  | 151168538 | 151168577 | RHEB_11083    | + | GTGACCTATGCACCAGACGTGAAAAAAGACAAACCAGTAAGTCCAGCATTTGTATTGCTAGATCGGAAGAGCGGTTTCAG     |
| chr7  | 151168702 | 151168741 | RHEB_11084    | + | GTGACCTATGCACCAGACGTAAGAATAAATAGACATCCATTTTAAATGTTGAAGTTTGTAGATCGGAAGAGCGGTTTCAG     |
| chr7  | 151174512 | 151174551 | RHEB_11085    | + | GTGACCTATGCACCAGACGTAAAAAATTTATCTTTGAGTAGTCTTCATATAGCATCACAAAAGATCGGAAGAGCGGTTTCAG   |
| chr7  | 151181901 | 151181940 | RHEB_11086    | + | GTGACCTATGCACCAGACGTAAAGAAATTAACATTAGTTTAAAAAATTAACTCGAAAAAGATCGGAAGAGCGGTTTCAG      |
| chr7  | 151188111 | 151188150 | RHEB_11087    | + | GTGACCTATGCACCAGACGTGAACAAGAGCTTAGTGTTGGCATATGAAGGTAAAAAGATCGGAAGAGCGGTTTCAG         |
| chr3  | 49397826  | 49397865  | RHOA_11088    | + | GTGACCTATGCACCAGACGTAAAAAATAGTCCTTTTAGCTAATAGTGTGGCATACATAAGATCGGAAGAGCGGTTTCAG      |
| chr3  | 49400070  | 49400109  | RHOA_11089    | + | GTGACCTATGCACCAGACGTAATGTAGAGAATTTGGGGATACATACAATTTCTATCTTGAAGATCGGAAGAGCGGTTTCAG    |
| chr3  | 49405992  | 49406031  | RHOA_11090    | + | GTGACCTATGCACCAGACGTAAAAACAACCACAAGAGTCAAGGTTAATCCCCACCCCAAGATCGGAAGAGCGGTTTCAG      |
| chr3  | 49413033  | 49413072  | RHOA_11091    | + | GTGACCTATGCACCAGACGTCAAAACACAGATTAACCTGCAATGCACAAGAAAGTCATAGATCGGAAGAGCGGTTTCAG      |
| chr1  | 26863471  | 26863510  | RPS6KA1_11092 | + | GTGACCTATGCACCAGACGTTGGCCAGCACCCCTGAGCGAGGGGCTGTGGGGGATCCTGTTAGATCGGAAGAGCGGTTTCAG   |
| chr1  | 26872537  | 26872576  | RPS6KA1_11093 | + | GTGACCTATGCACCAGACGTCGAATGTCTGGTCTGACCTGGCTGTGTCCCTTGACAGCAAGATCGGAAGAGCGGTTTCAG     |
| chr1  | 26873485  | 26873524  | RPS6KA1_11094 | + | GTGACCTATGCACCAGACGTAGCCCATAGCTGTGAAGGCCAACACTCGTTCATGTTAGAGGTAGATCGGAAGAGCGGTTTCAG  |
| chr1  | 26873772  | 26873811  | RPS6KA1_11095 | + | GTGACCTATGCACCAGACGTACACTCCCTGTGCGAGAACCCAGGCTGGCTGAGGGAGGCAGATCGGAAGAGCGGTTTCAG     |
| chr1  | 26877979  | 26878018  | RPS6KA1_11096 | + | GTGACCTATGCACCAGACGTTGGCCCTGCCTAGCTTCTACCACCCACCCATCCTTCGCCCTAGATCGGAAGAGCGGTTTCAG   |
| chr1  | 26878225  | 26878264  | RPS6KA1_11097 | + | GTGACCTATGCACCAGACGTATCTACTGCCAGAGGGCCCCGGGATGGAGCTGAGGGACGAAGATCGGAAGAGCGGTTTCAG    |
| chr1  | 26879999  | 26880038  | RPS6KA1_11098 | + | GTGACCTATGCACCAGACGTCCCTCCAGCCCCACCCAGCCTCCCAGGGGAGGCCCTTTCAGATCGGAAGAGCGGTTTCAG     |
| chr1  | 26880753  | 26880792  | RPS6KA1_11099 | + | GTGACCTATGCACCAGACGTGGCCCTGCCCCCTCGGGACCCAGGGGAGGACAGGACAAGAGATCGGAAGAGCGGTTTCAG     |
| chr1  | 26881723  | 26881762  | RPS6KA1_11100 | + | GTGACCTATGCACCAGACGTGCCCTGCCCTGATAACAATGGACTCCTCCAAGCCCCAGCCAGATCGGAAGAGCGGTTTCAG    |
| chr1  | 26882127  | 26882166  | RPS6KA1_11101 | + | GTGACCTATGCACCAGACGTCCAGCTCAGGGGAGGGGATGTGGCATGGGGAGCCGGTAAATCGGAAGAGCGGTTTCAG       |
| chr1  | 26883220  | 26883259  | RPS6KA1_11102 | + | GTGACCTATGCACCAGACGTCCAGCCACCCACAGGGCTCGGGCAGGGCTCAGCCCTGGATCGGAAGAGCGGTTTCAG        |
| chr1  | 26883602  | 26883641  | RPS6KA1_11103 | + | GTGACCTATGCACCAGACGTTATCTGTTTTGTCTGTCTTGGGCTGGTACAGGAGGGAAGCAGATCGGAAGAGCGGTTTCAG    |
| chr1  | 26885439  | 26885478  | RPS6KA1_11104 | + | GTGACCTATGCACCAGACGTGAGGGGCTGCTGCTCCATTATCCTTTTCAAAGAATGGCAGATCGGAAGAGCGGTTTCAG      |
| chr1  | 26887353  | 26887392  | RPS6KA1_11105 | + | GTGACCTATGCACCAGACGTTGACCACGTCTCGGCCAAGGCTGCTGGGTTGGGGGCAGGTAGATCGGAAGAGCGGTTTCAG    |
| chr1  | 26887636  | 26887675  | RPS6KA1_11106 | + | GTGACCTATGCACCAGACGTGCTTAAAGACTGGGGTGGGGACAGGAACCTCAACTCTCAAGATCGGAAGAGCGGTTTCAG     |
| chr1  | 26888165  | 26888204  | RPS6KA1_11107 | + | GTGACCTATGCACCAGACGTATTCGGGGAGGCAGTAGGGGATGCCAAGGGTCAATCATAGATCGGAAGAGCGGTTTCAG      |
| chr1  | 26898112  | 26898151  | RPS6KA1_11108 | + | GTGACCTATGCACCAGACGTACGCTCCTCAGCTGTAAGAGTGAAGGGGAATGGAGCCAGATCGGAAGAGCGGTTTCAG       |
| chr1  | 26898427  | 26898466  | RPS6KA1_11109 | + | GTGACCTATGCACCAGACGTCTGGCCCTGGACCCTCCCCACTCCTGCAGCCCTAGCACTTAGATCGGAAGAGCGGTTTCAG    |
| chr1  | 26898795  | 26898834  | RPS6KA1_11110 | + | GTGACCTATGCACCAGACGTACGGGCTGCGTGGGCTTATTTGGAGGAGGGAGGCAGGGTCAGATCGGAAGAGCGGTTTCAG    |
| chr1  | 26899863  | 26899902  | RPS6KA1_11111 | + | GTGACCTATGCACCAGACGTCTTTGGGCTGCTGGGCTCTGGGGGTCAGCCCAAGGTGGAGATCGGAAGAGCGGTTTCAG      |
| chr1  | 26900742  | 26900742  | RPS6KA1_11112 | + | GTGACCTATGCACCAGACGTCATTCGGGCCACAGGGCTGTGCTAGCTTTGACACAGTCAGCAGATCGGAAGAGCGGTTTCAG   |
| chr17 | 57987983  | 57988022  | RPS6KB1_11113 | + | GTGACCTATGCACCAGACGTATAAGAGATTTTCATTGTGTGTCTTCTTACAAGTAGGAGATCGGAAGAGCGGTTTCAG       |
| chr17 | 57990176  | 57990215  | RPS6KB1_11114 | + | GTGACCTATGCACCAGACGTTTTTTGAAATGAGAGCTGTTGTCTGTCTTGAATAGATTGAAGATCGGAAGAGCGGTTTCAG    |
| chr17 | 58003954  | 58003993  | RPS6KB1_11115 | + | GTGACCTATGCACCAGACGTAGAGTTTGGTGTAATTTTGCATTTGCTCCAGAACTGGAGATCGGAAGAGCGGTTTCAG       |
| chr17 | 58007546  | 58007585  | RPS6KB1_11116 | + | GTGACCTATGCACCAGACGTTTTTTGTTGTTGCATAGATTCAGGTAATTAACAAGCAAAAGCAGATCGGAAGAGCGGTTTCAG  |
| chr17 | 58009094  | 58009133  | RPS6KB1_11117 | + | GTGACCTATGCACCAGACGTACCGTAAACAATTTCTATAGTAAATAATCATCTTAAAAATCCAGATCGGAAGAGCGGTTTCAG  |
| chr17 | 58011632  | 58011671  | RPS6KB1_11118 | + | GTGACCTATGCACCAGACGTTTAAACATAATGGTTTGGGGTAATAGCTAATTTACAGATCGGAAGAGCGGTTTCAG         |
| chr17 | 58011896  | 58011935  | RPS6KB1_11119 | + | GTGACCTATGCACCAGACGTAGTTAAAAAGCTGCATTAATTGGTCTGTGCTGAGTCACAGATCGGAAGAGCGGTTTCAG      |
| chr17 | 58012672  | 58012711  | RPS6KB1_11120 | + | GTGACCTATGCACCAGACGTTAAATGGTCACTGACACTACAAGATTCAATGACTAGGATTAGATCGGAAGAGCGGTTTCAG    |
| chr17 | 58013649  | 58013688  | RPS6KB1_11121 | + | GTGACCTATGCACCAGACGTGCATCTTTGGTGTGTTGTTGGGGAAAGATAATGCTAGTTTTAAGATCGGAAGAGCGGTTTCAG  |
| chr17 | 58018315  | 58018354  | RPS6KB1_11122 | + | GTGACCTATGCACCAGACGTGAATTTCCATGTAGTCAATGGGAAATTTTGTAGTGTGAGGATGAGATCGGAAGAGCGGTTTCAG |
| chr17 | 58022890  | 58022929  | RPS6KB1_11123 | + | GTGACCTATGCACCAGACGTCCTTTTCACTTTTTTTGTTTTTAAACAACCTACAAGATCGGAAGAGCGGTTTCAG          |
| chr17 | 58024160  | 58024199  | RPS6KB1_11124 | + | GTGACCTATGCACCAGACGTCCTTTTAAGTAAATTAAGGCCAAAAAAGGTGAGAGGGAGATAGATCGGAAGAGCGGTTTCAG   |
| chr8  | 92972756  | 92972795  | RUNX1T1_11125 | + | GTGACCTATGCACCAGACGTAGGCGAGAAGAAAGCAAGATCCCAAGTTAATCACTGTTAAAGATCGGAAGAGCGGTTTCAG    |
| chr8  | 92983087  | 92983126  | RUNX1T1_11126 | + | GTGACCTATGCACCAGACGTGTCAGGCCAAACCAGACAAGAAAACCTCTCAGTTAGCCAGATCGGAAGAGCGGTTTCAG      |
| chr8  | 92988212  | 92988251  | RUNX1T1_11127 | + | GTGACCTATGCACCAGACGTGATGGGAAGGGGTTGGAGAGAGGAGAGTACTGTAAGCAGATCGGAAGAGCGGTTTCAG       |
| chr8  | 92998564  | 92998603  | RUNX1T1_11128 | + | GTGACCTATGCACCAGACGTAAGGGGAGAATAGGGAAAGACATATAATCATCACAATTAAGATCGGAAGAGCGGTTTCAG     |
| chr8  | 92999211  | 92999250  | RUNX1T1_11129 | + | GTGACCTATGCACCAGACGTAGAGAAGGCTGAATAAACCCTAAAGCATTCAGTACACAACCAGATCGGAAGAGCGGTTTCAG   |
| chr8  | 93004128  | 93004167  | RUNX1T1_11130 | + | GTGACCTATGCACCAGACGTAAAAACAAGAGTTTGTCTTCATCTATCCATGATTCAGAAACCAGATCGGAAGAGCGGTTTCAG  |
| chr8  | 93017536  | 93017575  | RUNX1T1_11131 | + | GTGACCTATGCACCAGACGTATGACAGGAATGAGAGGACGGACTGAAAGTTTTCTTCTGTAGATCGGAAGAGCGGTTTCAG    |
| chr8  | 93023330  | 93023369  | RUNX1T1_11132 | + | GTGACCTATGCACCAGACGTAAATATGTAGTATAAATACATTAGCTGTTGGTAAATAGTAGATCGGAAGAGCGGTTTCAG     |
| chr8  | 93027059  | 93027098  | RUNX1T1_11133 | + | GTGACCTATGCACCAGACGTACAAAAATCAGAAGGAAGTCATAAACTTACAGAGAACATGAGATCGGAAGAGCGGTTTCAG    |
| chr8  | 93029579  | 93029618  | RUNX1T1_11134 | + | GTGACCTATGCACCAGACGTTTTCTCAGTACGATCTGGAGGATGCCACCAAGAACATTAAGATCGGAAGAGCGGTTTCAG     |
| chr8  | 93029602  | 93029641  | RUNX1T1_11135 | + | GTGACCTATGCACCAGACGTCCACCAGACATAAATTTTACTCCTTAAAGCACCTCAGTAGATCGGAAGAGCGGTTTCAG      |
| chr8  | 93074791  | 93074830  | RUNX1T1_11136 | + | GTGACCTATGCACCAGACGTAGCCGTACCACACATAGAAATGGCTGTCTCCTAAAAGCAAGCAGATCGGAAGAGCGGTTTCAG  |



|       |           |           |               |   |                                                                                     |
|-------|-----------|-----------|---------------|---|-------------------------------------------------------------------------------------|
| chr8  | 93088291  | 93088330  | RUNX1T1_11137 | + | GTGACCTATGCACCAGACGTTTCGCTCTGCTAATTTTCCTCTCTCTTTTCTGACTGGGACAAGATCGGAAGAGCGGTTTCAG  |
| chr1  | 161284226 | 161284265 | SDHC_11138    | + | GTGACCTATGCACCAGACGTTGGGACTGGGAGTTGGTGCCTCGCGCCCTCCGGAGATCTGAGATCGGAAGAGCGGTTTCAG   |
| chr1  | 161298298 | 161298337 | SDHC_11139    | + | GTGACCTATGCACCAGACGTATTCTGGAGCCAGAGAATCTAGAGGTAGTGGGTGAAAGTTAGATCGGAAGAGCGGTTTCAG   |
| chr1  | 161310456 | 161310495 | SDHC_11140    | + | GTGACCTATGCACCAGACGTGTGTTTTACACACACATATGTGCTTCTTTGAAAACTTGAGATCGGAAGAGCGGTTTCAG     |
| chr1  | 161326641 | 161326680 | SDHC_11141    | + | GTGACCTATGCACCAGACGTTCCGGATTGTCACATTTTCTCTGTGAAGGGAGTGGGGAGAAGATCGGAAGAGCGGTTTCAG   |
| chr1  | 161332234 | 161332273 | SDHC_11142    | + | GTGACCTATGCACCAGACGTTCCAGCATCTCTCCACATATTTACATTCAACAGATCGGAAGAGCGGTTTCAG            |
| chr1  | 161332341 | 161332380 | SDHC_11143    | + | GTGACCTATGCACCAGACGTATTCTTCAGATCTCCTTGGAGCAGTAGACTACCTGGTAGACAGATCGGAAGAGCGGTTTCAG  |
| chr11 | 111957694 | 111957733 | SDHD_11144    | + | GTGACCTATGCACCAGACGTTTCCACCCCTGAGGTGCTTAGCGTAGCCTCCAGCCAGGGAAGATCGGAAGAGCGGTTTCAG   |
| chr11 | 111958708 | 111958747 | SDHD_11145    | + | GTGACCTATGCACCAGACGTTCCATCGCTGCTGCTTTCTGGGCTCTAGCCATCTTTACCTAGATCGGAAGAGCGGTTTCAG   |
| chr11 | 111959746 | 111959785 | SDHD_11146    | + | GTGACCTATGCACCAGACGTCAATTCCAAATATAGTTGCTGCTCAGTTTGTTTGCTGTGAGATCGGAAGAGCGGTTTCAG    |
| chr11 | 111965705 | 111965744 | SDHD_11147    | + | GTGACCTATGCACCAGACGTTTCATACTTTGAAGAATTGATGTATGCCTCTTTGCCTCTGAGATCGGAAGAGCGGTTTCAG   |
| chr10 | 88718586  | 88718625  | SNCG_11148    | + | GTGACCTATGCACCAGACGTATGGCAGGTTGGGACAGTGTGGTGCCCAAGGGTGAGTGAAGATCGGAAGAGCGGTTTCAG    |
| chr10 | 88719442  | 88719481  | SNCG_11149    | + | GTGACCTATGCACCAGACGTCCAGGGCCAGGGGACACATGGGGATAGGACCCCTGGGGAGATCGGAAGAGCGGTTTCAG     |
| chr10 | 88719896  | 88719935  | SNCG_11150    | + | GTGACCTATGCACCAGACGTGCCCTCAGACCTGCCAGTCTCTCCTGGGCCAGAAAAGGAGATCGGAAGAGCGGTTTCAG     |
| chr10 | 88722443  | 88722482  | SNCG_11151    | + | GTGACCTATGCACCAGACGTGGCTCCTGGGGTGACCATGGGGGTTCTTGTTAGGGACAGATCGGAAGAGCGGTTTCAG      |
| chr10 | 88722753  | 88722792  | SNCG_11152    | + | GTGACCTATGCACCAGACGTGCCACGTGGATGACCTGAAGAGCGCTCCTCTGCCCTTGAAGATCGGAAGAGCGGTTTCAG    |
| chr12 | 93966823  | 93966862  | SOCS2_11153   | + | GTGACCTATGCACCAGACGTGATCGGCGCCGACGCTGCGGGAGGAGCGCCTCCCAAGAGATCGGAAGAGCGGTTTCAG      |
| chr12 | 93968966  | 93969005  | SOCS2_11154   | + | GTGACCTATGCACCAGACGTTTTTTAAACATGTCTACATGAGTATCCGAATCGACAGATCGGAAGAGCGGTTTCAG        |
| chr1  | 16174656  | 16174695  | SPEN_11155    | + | GTGACCTATGCACCAGACGTGAGGCCCGCGCCGCTCGCTCCTCGGGCGCCGCTTCCAGATCGGAAGAGCGGTTTCAG       |
| chr1  | 16199642  | 16199681  | SPEN_11156    | + | GTGACCTATGCACCAGACGTAGGTTTCTGTAGGCAGGATTTTGTATTTGATATGGTGAAGATCGGAAGAGCGGTTTCAG     |
| chr1  | 16203184  | 16203223  | SPEN_11157    | + | GTGACCTATGCACCAGACGTAGCCTTTTGTATAACAGATGAGCTAGCTTAAACAAATAGATCGGAAGAGCGGTTTCAG      |
| chr1  | 16235987  | 16236026  | SPEN_11158    | + | GTGACCTATGCACCAGACGTGTGTAATGTCTTTCCCTCTGTGCTACTGAGGAATGAAGATCGGAAGAGCGGTTTCAG       |
| chr1  | 16237807  | 16237846  | SPEN_11159    | + | GTGACCTATGCACCAGACGTAGCAAGCTGAGTTTGATTTACTCATCACACTGTTGAGATCGGAAGAGCGGTTTCAG        |
| chr1  | 16242785  | 16242824  | SPEN_11160    | + | GTGACCTATGCACCAGACGTGTTTACTATGTAACAAATTTAGTCTTTGTCTATAACACATAGATCGGAAGAGCGGTTTCAG   |
| chr1  | 16245557  | 16245596  | SPEN_11161    | + | GTGACCTATGCACCAGACGTTTGCATAAATTTATGTGCTGTTATGATTTGCTTTGTTTTAGATCGGAAGAGCGGTTTCAG    |
| chr1  | 16246023  | 16246062  | SPEN_11162    | + | GTGACCTATGCACCAGACGTGTTTTGGTATGTGTTTCAGACTCTGACTCACTCGTCTTAGATCGGAAGAGCGGTTTCAG     |
| chr1  | 16247489  | 16247528  | SPEN_11163    | + | GTGACCTATGCACCAGACGTTGACTTTAAACAGAAGCAAAAACAAAGTCTATTCAAAATCTAGATCGGAAGAGCGGTTTCAG  |
| chr1  | 16248855  | 16248894  | SPEN_11164    | + | GTGACCTATGCACCAGACGTAAACTTACCAGTGAGCTTGATGTTTTAATAGTTTTAATAAGATCGGAAGAGCGGTTTCAG    |
| chr1  | 16262772  | 16262811  | SPEN_11165    | + | GTGACCTATGCACCAGACGTGAGTATCTCCCATGCTGTTGGCATGTCTTGGGATGCGTGGAGATCGGAAGAGCGGTTTCAG   |
| chr1  | 16264151  | 16264190  | SPEN_11166    | + | GTGACCTATGCACCAGACGTGCAGGGCTGCCCTTCTGGCCCCAAGTTTTATGCCATGAGATCGGAAGAGCGGTTTCAG      |
| chr1  | 16264512  | 16264551  | SPEN_11167    | + | GTGACCTATGCACCAGACGTGAGGCCCGAGGTTGAGCAACTGCCCCACCTACAGGGAGGAAGAGATCGGAAGAGCGGTTTCAG |
| chr1  | 16265382  | 16265421  | SPEN_11168    | + | GTGACCTATGCACCAGACGTCTGTGTCCTTCCCTCACATGTACCCACAGGTGGGGCTGAGATCGGAAGAGCGGTTTCAG     |
| chr1  | 16265933  | 16265972  | SPEN_11169    | + | GTGACCTATGCACCAGACGTGTTATACCTCAGTGAATCTTCCAGGGCTCTGCAGTAAAGATCGGAAGAGCGGTTTCAG      |
| chr1  | 16255077  | 16255116  | SPEN_11170    | + | GTGACCTATGCACCAGACGTGTTGGAGCGCTATCAAAAATGAAAAGACAGATAAAGAAGATCGGAAGAGCGGTTTCAG      |
| chr1  | 16255558  | 16255597  | SPEN_11171    | + | GTGACCTATGCACCAGACGTGGAAGGGGCTTCAAGCAATGTTGAAGTGGTGGAGAAAGATCGGAAGAGCGGTTTCAG       |
| chr1  | 16256039  | 16256078  | SPEN_11172    | + | GTGACCTATGCACCAGACGTCAATCAAAAAGGCCATTTCCCTCAAACCACAGCTCAAACAGATCGGAAGAGCGGTTTCAG    |
| chr1  | 16256520  | 16256559  | SPEN_11173    | + | GTGACCTATGCACCAGACGTCCAGTGTCCGACATGTTTCCCTCCATGAAGATGAGGATCCAGATCGGAAGAGCGGTTTCAG   |
| chr1  | 16257001  | 16257040  | SPEN_11174    | + | GTGACCTATGCACCAGACGTCTAGTTCTTTAGAAAAGAAACAAATTTTACTCTTTTGAAGATCGGAAGAGCGGTTTCAG     |
| chr1  | 16257482  | 16257521  | SPEN_11175    | + | GTGACCTATGCACCAGACGTTTCCATAGCAGATTTATGGAGCTCACACGGATGCAACAGAAGATCGGAAGAGCGGTTTCAG   |
| chr1  | 16257963  | 16258002  | SPEN_11176    | + | GTGACCTATGCACCAGACGTCCCAGGCAGAGACAGTAGTCCAGAGCCTGACAGTACAGATCGGAAGAGCGGTTTCAG       |
| chr1  | 16258444  | 16258483  | SPEN_11177    | + | GTGACCTATGCACCAGACGTGTAAGGAGCGTCTATGCAACCATGGAGTGCACCATGAAAACAGATCGGAAGAGCGGTTTCAG  |
| chr1  | 16258925  | 16258964  | SPEN_11178    | + | GTGACCTATGCACCAGACGTGAGAAAAAACCGGCCCTGAAAAAACTCCAAATCAAAGAAGATCGGAAGAGCGGTTTCAG     |
| chr1  | 16259406  | 16259445  | SPEN_11179    | + | GTGACCTATGCACCAGACGTATGACATTTCTGGGGAGCCAGAAAACCTCCAGCACCTCCAGATCGGAAGAGCGGTTTCAG    |
| chr1  | 16259887  | 16259926  | SPEN_11180    | + | GTGACCTATGCACCAGACGTAAAGCAGAGTGAGAAAACCCCACTTCCACTCTCCTCAGTCAAGATCGGAAGAGCGGTTTCAG  |
| chr1  | 16260368  | 16260407  | SPEN_11181    | + | GTGACCTATGCACCAGACGTTCTGCCCAAGTGTCACTTCCACAAGTGTCAACACGCAAGATCGGAAGAGCGGTTTCAG      |
| chr1  | 16260849  | 16260888  | SPEN_11182    | + | GTGACCTATGCACCAGACGTATGTTCTCACACTGACTGACCGCACGGTGGGCACAGTATCGGAAGAGCGGTTTCAG        |
| chr1  | 16261330  | 16261369  | SPEN_11183    | + | GTGACCTATGCACCAGACGTGCCCTCCATCCAAAGGCCCTCAAGCTCCTGCAGGCTATGCGAGATCGGAAGAGCGGTTTCAG  |
| chr1  | 16261811  | 16261850  | SPEN_11184    | + | GTGACCTATGCACCAGACGTCTCGACCAAGTGGACCCGGGCCATCCTCATTCCCAAGGGAGATCGGAAGAGCGGTTTCAG    |
| chr1  | 16262292  | 16262331  | SPEN_11185    | + | GTGACCTATGCACCAGACGTTGCACCCCTATACTGTGCCACGGATGTGAGGATCATGTTAGATCGGAAGAGCGGTTTCAG    |
| chrX  | 48888123  | 48888162  | TFE3_11186    | + | GTGACCTATGCACCAGACGTTAGGGGTTGGGTGCAGGATAAGTAGGGTTTCCAGTCCCTCAGATCGGAAGAGCGGTTTCAG   |
| chrX  | 48889070  | 48889109  | TFE3_11187    | + | GTGACCTATGCACCAGACGTCAAGTGGGAGGCAAGCAGAAATGCCACATGAGGAGTTTTCAGATCGGAAGAGCGGTTTCAG   |
| chrX  | 48891066  | 48891105  | TFE3_11188    | + | GTGACCTATGCACCAGACGTGGGAGGAGGAGAAAGAGGATGGGAAAGAGTTGTCAATAGATCGGAAGAGCGGTTTCAG      |
| chrX  | 48891308  | 48891347  | TFE3_11189    | + | GTGACCTATGCACCAGACGTGTTGAGTGTAGCAGGCCCTCTGAGCACAGGAAGGCAAGAAAAGATCGGAAGAGCGGTTTCAG  |
| chrX  | 48891777  | 48891816  | TFE3_11190    | + | GTGACCTATGCACCAGACGTAGAGGGCAGAGAACCACCAGTTGGGAACAAACCAGGCTTAGATCGGAAGAGCGGTTTCAG    |
| chrX  | 48895650  | 48895689  | TFE3_11191    | + | GTGACCTATGCACCAGACGTAAGTAAATATTATACAGGTTTAGAAGAAATTTGGGAGGGGAAAGATCGGAAGAGCGGTTTCAG |
| chrX  | 48895978  | 48896017  | TFE3_11192    | + | GTGACCTATGCACCAGACGTAGGTAGACAAGGAAAGAGAGGGGCAAGGCAGAACAGACAGATCGGAAGAGCGGTTTCAG     |
| chrX  | 48896946  | 48896985  | TFE3_11193    | + | GTGACCTATGCACCAGACGTGGAATTTGGGCCATATTTAGTAAAGTCTCAAGATCGGAAGAGCGGTTTCAG             |
| chrX  | 48898106  | 48898145  | TFE3_11194    | + | GTGACCTATGCACCAGACGTGGTAGAGTGGTGTGATTGATGAAGGACCTTATTCAGATCGGAAGAGCGGTTTCAG         |

|       |           |           |              |   |                                                                                     |
|-------|-----------|-----------|--------------|---|-------------------------------------------------------------------------------------|
| chrX  | 48900763  | 48900802  | TFE3_11195   | + | GTGACCTATGCACCAGACGTCCCCGGGCGAGCCCTGCCAGGCCGGTCCGGCCCTCGGCCCGGAGATCGGAAGAGCGGTTCCAG |
| chr9  | 101891393 | 101891432 | TGFBR1_11196 | + | GTGACCTATGCACCAGACGTTAAAATTTTTTCCCTAGATACACAAGAAAACTCTTCATAGATCGGAAGAGCGGTTCCAG     |
| chr9  | 101895032 | 101895071 | TGFBR1_11197 | + | GTGACCTATGCACCAGACGTTGTCTCTCTTTTTCTAAGACATCTTTTTAAAATTAAGCAGATCGGAAGAGCGGTTCCAG     |
| chr9  | 101900382 | 101900421 | TGFBR1_11198 | + | GTGACCTATGCACCAGACGTTTTGCTTTTCCTTATGTTATATATAACAAGATCTCTTAAAGATCGGAAGAGCGGTTCCAG    |
| chr9  | 101904996 | 101905035 | TGFBR1_11199 | + | GTGACCTATGCACCAGACGTAAGCAGTCTATTATTTAAGCTTTAAATTTTCATGAATAAAGATCGGAAGAGCGGTTCCAG    |
| chr9  | 101907181 | 101907220 | TGFBR1_11200 | + | GTGACCTATGCACCAGACGTGAACAACATATATTAATCTTCTGAATCACCTTTTTTCAGATCGGAAGAGCGGTTCCAG      |
| chr9  | 101908902 | 101908941 | TGFBR1_11201 | + | GTGACCTATGCACCAGACGTCCTCTCCCTCAGTAGTTGTATGATGAGCAGAAGTTGTTTCAGATCGGAAGAGCGGTTCCAG   |
| chr9  | 101910077 | 101910116 | TGFBR1_11202 | + | GTGACCTATGCACCAGACGTCTTTTGATATTAGCAATTTTTCTAACTGCTTCTGCTTAAAGATCGGAAGAGCGGTTCCAG    |
| chr9  | 101911598 | 101911637 | TGFBR1_11203 | + | GTGACCTATGCACCAGACGTTTGCCTGAACTCTCTTTTTTCTCAGATCTGCTCCTGGGAGATCGGAAGAGCGGTTCCAG     |
| chr10 | 102896681 | 102896720 | TLX1_11204   | + | GTGACCTATGCACCAGACGTTCTGCCCTGTGGGACCCAGGCCACTCAGGGGTCACTGAAGATCGGAAGAGCGGTTCCAG     |
| chr10 | 102891593 | 102891632 | TLX1_11205   | + | GTGACCTATGCACCAGACGTGGCTCCTACAACGTGAACATGGCCTTGGCAGGCCGCCCGGAGATCGGAAGAGCGGTTCCAG   |
| chr3  | 195591069 | 195591108 | TNK2_11206   | + | GTGACCTATGCACCAGACGTGGAAACCACCAGCACAGTTAAACAGTTTACAGAAGGTTCAAGATCGGAAGAGCGGTTCCAG   |
| chr3  | 195593898 | 195593937 | TNK2_11207   | + | GTGACCTATGCACCAGACGTGGGTGGCGGCCATGACACGCGGGCCAGGGCCACTAGATCGGAAGAGCGGTTCCAG         |
| chr3  | 195594140 | 195594179 | TNK2_11208   | + | GTGACCTATGCACCAGACGTGCACACCCACCCTGTGACGACCACTAGGGCCCACTGCTCAGATCGGAAGAGCGGTTCCAG    |
| chr3  | 195595591 | 195595630 | TNK2_11209   | + | GTGACCTATGCACCAGACGTAAGGGAGAGCCCAACAGGAAGGCAGTCAAGCAGGGTCTGGAGATCGGAAGAGCGGTTCCAG   |
| chr3  | 195596423 | 195596462 | TNK2_11210   | + | GTGACCTATGCACCAGACGTGGCCATGCGGCACAGGGGGAGAGACAGCGGAGACAGAGATCGGAAGAGCGGTTCCAG       |
| chr3  | 195597087 | 195597126 | TNK2_11211   | + | GTGACCTATGCACCAGACGTGAGAGCTGGGTCAAGAGAGCAGGGGAAGCGTGTGGAGGGGAGATCGGAAGAGCGGTTCCAG   |
| chr3  | 195599352 | 195599391 | TNK2_11212   | + | GTGACCTATGCACCAGACGTGAGATGGCAGGTCAGTGGACGCCAGGGTGGCGGGGAGATCGGAAGAGCGGTTCCAG        |
| chr3  | 195605229 | 195605268 | TNK2_11213   | + | GTGACCTATGCACCAGACGTAGGAAGTCTGTGCCAACTCTGGGACTGACGCCTGGGTAGAGATCGGAAGAGCGGTTCCAG    |
| chr3  | 195605474 | 195605513 | TNK2_11214   | + | GTGACCTATGCACCAGACGTGGAGGTGCAGAGTTTACGACAAACAGAGCGCCAGCCCTAGATCGGAAGAGCGGTTCCAG     |
| chr3  | 195606057 | 195606096 | TNK2_11215   | + | GTGACCTATGCACCAGACGTGAGGGTCAAAGAGAAAGCCCTCTCAACACCTACCTGCGAGATCGGAAGAGCGGTTCCAG     |
| chr3  | 195609210 | 195609249 | TNK2_11216   | + | GTGACCTATGCACCAGACGTGGAGGAGGCAGGAGGAATGAGCTGGAGGACCCCTGCCCTTAGATCGGAAGAGCGGTTCCAG   |
| chr3  | 195610191 | 195610230 | TNK2_11217   | + | GTGACCTATGCACCAGACGTGGGATTTGCAAGGACTCAGGACTTGCAGGTCAGACAGATCGGAAGAGCGGTTCCAG        |
| chr3  | 195611915 | 195611954 | TNK2_11218   | + | GTGACCTATGCACCAGACGTGGCAGCGGGCCAGATGGAATCCAACACCCAGGGTCAAGATCGGAAGAGCGGTTCCAG       |
| chr3  | 195613929 | 195613968 | TNK2_11219   | + | GTGACCTATGCACCAGACGTAGCGGGAAACCGCTGCTGTGAAGGCCGCGTAGCCCGAGAGATCGGAAGAGCGGTTCCAG     |
| chr3  | 195615470 | 195615509 | TNK2_11220   | + | GTGACCTATGCACCAGACGTCCCAGCCTCTGTGGGGGAGGAGTGGCTCAGGGACAAGGGAGATCGGAAGAGCGGTTCCAG    |
| chr3  | 195615488 | 195615527 | TNK2_11221   | + | GTGACCTATGCACCAGACGTAGGAGTGGCTCAGGGACAAGGGTTGTGGGGGGACAACAGGAGATCGGAAGAGCGGTTCCAG   |
| chr3  | 195622298 | 195622337 | TNK2_11222   | + | GTGACCTATGCACCAGACGTTGCAGGGCCGCTACTGCGCTCAGCCCCATAGCCTCATCAGATCGGAAGAGCGGTTCCAG     |
| chr3  | 195594691 | 195594730 | TNK2_11223   | + | GTGACCTATGCACCAGACGTAGGTGAGCTTGCAGCAGGGGAGGCGGAGATCGGAAGAGCGGTTCCAG                 |
| chr3  | 195595140 | 195595179 | TNK2_11224   | + | GTGACCTATGCACCAGACGTGCGCAGGGACCCCGCGCCACGACGGTGTGTTGATGGAAGATCGGAAGAGCGGTTCCAG      |
| chr19 | 54072650  | 54072689  | ZNF331_11225 | + | GTGACCTATGCACCAGACGTATTTCTCTTCTTCTTCTGAGCTATGATATTTGCGTCTGTAGATCGGAAGAGCGGTTCCAG    |
| chr19 | 54074995  | 54075034  | ZNF331_11226 | + | GTGACCTATGCACCAGACGTGCCTCAGATAACTTAGACTGCCTCCTGGAATATCCGCTCAGATCGGAAGAGCGGTTCCAG    |
| chr19 | 54080379  | 54080418  | ZNF331_11227 | + | GTGACCTATGCACCAGACGTTGTAAGACTGTGGGAAGGCTTTTTCGATGGGGCTCAAGCCAGATCGGAAGAGCGGTTCCAG   |
| chr19 | 54080797  | 54080836  | ZNF331_11228 | + | GTGACCTATGCACCAGACGTAATGTAAGGAGTGTGGGAAGGCTTTTCGCTGGGGTTCAGAGATCGGAAGAGCGGTTCCAG    |
| chr11 | 10327356  | 10327395  | ADM_11229    | + | GTGACCTATGCACCAGACGTGCAGCGCTTCCCCTTTGCTGGTACTGGCAGGCAAGGGGAGATCGGAAGAGCGGTTCCAG     |
| chr11 | 10327656  | 10327695  | ADM_11230    | + | GTGACCTATGCACCAGACGTCTGTGCTGTCCAGGGACGGGAGGGAAGGAGTGTGCGGAGATCGGAAGAGCGGTTCCAG      |
| chr11 | 10328199  | 10328238  | ADM_11231    | + | GTGACCTATGCACCAGACGTCCCATGGTACAAGGAATAGTCGCGCAAGCATCCCCTGGTATCGGAAGAGCGGTTCCAG      |
| chr14 | 20923873  | 20923912  | APEX1_11232  | + | GTGACCTATGCACCAGACGTGAAATCAGCCCTTCTTCTTAGAAGCTGCGGCGGGGTGTATAGATCGGAAGAGCGGTTCCAG   |
| chr14 | 20924271  | 20924310  | APEX1_11233  | + | GTGACCTATGCACCAGACGTTTTGAGGGAAAGAGACATTTTTTAGTATTGAATGGTCTTAAGATCGGAAGAGCGGTTCCAG   |
| chr14 | 20925030  | 20925069  | APEX1_11234  | + | GTGACCTATGCACCAGACGTATTGATCCTAATGCCTGAACTTCAAACCAATTGCTAAGATCGGAAGAGCGGTTCCAG       |
| chr14 | 20925678  | 20925717  | APEX1_11235  | + | GTGACCTATGCACCAGACGTAATCACTTTGAGCCTGGGAAATAAGCCCCCTCAACTACAGATCGGAAGAGCGGTTCCAG     |
| chr14 | 20925419  | 20925458  | APEX1_11236  | + | GTGACCTATGCACCAGACGTGCCAAAGGCTTCGGGGAAATTACTGCAGGCTGTGCCACTGGAGATCGGAAGAGCGGTTCCAG  |
| chr19 | 41725393  | 41725432  | AXL_11237    | + | GTGACCTATGCACCAGACGTGGGGCTCCTTGGGGCAGGGATCCCTCGGAGGGGCTGGGAGATCGGAAGAGCGGTTCCAG     |
| chr19 | 41726774  | 41726813  | AXL_11238    | + | GTGACCTATGCACCAGACGTACATCCCCGAATCCCACCTCCCTGTCACACAGAGGGAGATCGGAAGAGCGGTTCCAG       |
| chr19 | 41727162  | 41727201  | AXL_11239    | + | GTGACCTATGCACCAGACGTGGGTGAGGGTCTGAGGGTCCAGGGACATGTGGCGCTCAGATCGGAAGAGCGGTTCCAG      |
| chr19 | 41727972  | 41728011  | AXL_11240    | + | GTGACCTATGCACCAGACGTGGATGTGGGTGAGTCCGGAAGGGGCGGGCAGGGTCAAGATCGGAAGAGCGGTTCCAG       |
| chr19 | 41736963  | 41737002  | AXL_11241    | + | GTGACCTATGCACCAGACGTTGGGAGGTGGGGAGCTGGCGTCAGAGGGTGGGGTTGGGAGATCGGAAGAGCGGTTCCAG     |
| chr19 | 41737214  | 41737253  | AXL_11242    | + | GTGACCTATGCACCAGACGTCAAACCTTGGTTCACTTTCAGTCTCAGGCCTCCTCCACCCAAGATCGGAAGAGCGGTTCCAG  |
| chr19 | 41744070  | 41744109  | AXL_11243    | + | GTGACCTATGCACCAGACGTTTGGGAGGGACACGTCAACCTGCCCCACCGACCTTGCAGATCGGAAGAGCGGTTCCAG      |
| chr19 | 41744525  | 41744564  | AXL_11244    | + | GTGACCTATGCACCAGACGTCTGGTGGGATTGGAGTGGAGTGGCTTGGGGAGGAGGAGATCGGAAGAGCGGTTCCAG       |
| chr19 | 41745230  | 41745269  | AXL_11245    | + | GTGACCTATGCACCAGACGTAGCCATGCCCACTGCTTCAACCTGCTCCTCCATGACAAGATCGGAAGAGCGGTTCCAG      |
| chr19 | 41745636  | 41745675  | AXL_11246    | + | GTGACCTATGCACCAGACGTCCACACCCCATCTCTCTTCCCTACCCTCAACACTAGTAGATCGGAAGAGCGGTTCCAG      |
| chr19 | 41748931  | 41748970  | AXL_11247    | + | GTGACCTATGCACCAGACGTACCACATGGGGAGGCTGTGTGGCCTGGGATGGAGAGGCTGAGATCGGAAGAGCGGTTCCAG   |
| chr19 | 41749623  | 41749662  | AXL_11248    | + | GTGACCTATGCACCAGACGTCCTATGCCCACTGCCCTGGCTGGATCTAAAGGCTGTAGAGATCGGAAGAGCGGTTCCAG     |
| chr19 | 41754525  | 41754564  | AXL_11249    | + | GTGACCTATGCACCAGACGTGGCAGCATTACACACATCTTCTGAACTTCTGAGATCTGAGATCGGAAGAGCGGTTCCAG     |
| chr19 | 41754736  | 41754775  | AXL_11250    | + | GTGACCTATGCACCAGACGTTGCACATGTGTAGGACCCCTCCTCCTATGCCCTAGATCGGAAGAGCGGTTCCAG          |
| chr19 | 41758359  | 41758398  | AXL_11251    | + | GTGACCTATGCACCAGACGTTGCAGATTCAAGGGCTTACAAGCCCTAGGAGATCGGAAGAGCGGTTCCAG              |
| chr19 | 41759624  | 41759663  | AXL_11252    | + | GTGACCTATGCACCAGACGTTTTCAGGGACCCCCCTTCCCTGCTGACTCCTCAGATCGGAAGAGCGGTTCCAG           |

|       |           |           |              |   |                                                                                          |
|-------|-----------|-----------|--------------|---|------------------------------------------------------------------------------------------|
| chr19 | 41762527  | 41762566  | AXL_11253    | + | GTGACCTATGCACCAGACGTTCCCGCCAAGAGTGGGGAACCATGGGAGGGCATGGCTGAAGATCGGAAGAGCGGTTCCAG         |
| chr19 | 41763545  | 41763584  | AXL_11254    | + | GTGACCTATGCACCAGACGTTTAGGTCTCCCCAACCCAGAATTCATTTCAAACCCCTGAAGATCGGAAGAGCGGTTCCAG         |
| chr19 | 41765820  | 41765859  | AXL_11255    | + | GTGACCTATGCACCAGACGTCACCTGGTACTCCCTCTCAGGATCCAAGCTAAGCACTGCCAGATCGGAAGAGCGGTTCCAG        |
| chr11 | 102196307 | 102196346 | BIRC3_11256  | + | GTGACCTATGCACCAGACGTTGAAATTCCTTTGCAAAATTCCTGTGATATCATGAGATTAGATCGGAAGAGCGGTTCCAG         |
| chr11 | 102198872 | 102198911 | BIRC3_11257  | + | GTGACCTATGCACCAGACGTTTCTTTTTTAAATATTGGTTGCCATCAGAGAAATTCCTTAGATCGGAAGAGCGGTTCCAG         |
| chr11 | 102199687 | 102199726 | BIRC3_11258  | + | GTGACCTATGCACCAGACGTTGGATAAATGAATGCATTAAATAGAGTCATTTGGTACAGATCGGAAGAGCGGTTCCAG           |
| chr11 | 102201983 | 102202022 | BIRC3_11259  | + | GTGACCTATGCACCAGACGTTTAAATACAGTCTTTTTAATAAGATTGATATCAGTAGATCGGAAGAGCGGTTCCAG             |
| chr11 | 102207543 | 102207582 | BIRC3_11260  | + | GTGACCTATGCACCAGACGTTAATATTTTTAAATCAATAGAGAACCATTGTCTTTTTTTCTAGATCGGAAGAGCGGTTCCAG       |
| chr11 | 102207844 | 102207883 | BIRC3_11261  | + | GTGACCTATGCACCAGACGTTAAACATCGTCTAAACTTTAGAATTAATTTATTAATGTATAGATCGGAAGAGCGGTTCCAG        |
| chr11 | 102195677 | 102195716 | BIRC3_11262  | + | GTGACCTATGCACCAGACGTTAAACTCCAGAGCAAAATCAAGATTTTTCTGCCTTGATGAGAGATCGGAAGAGCGGTTCCAG       |
| chr14 | 54417617  | 54417656  | BMP4_11263   | + | GTGACCTATGCACCAGACGTTTGAAGGAAGGGGAAAAAGAAAAGCATATGAACTTTTAGATCGGAAGAGCGGTTCCAG           |
| chr14 | 54418951  | 54418990  | BMP4_11264   | + | GTGACCTATGCACCAGACGTTGGAGGGGGAGGGAGTGGAAAGTTAAAGAATAAATAACAGATCGGAAGAGCGGTTCCAG          |
| chr14 | 54417188  | 54417227  | BMP4_11265   | + | GTGACCTATGCACCAGACGTTCCACTCCCTTGAGTGAACGATCGCTAATCCTGACATCGGAAAGAGCGGTTCCAG              |
| chr10 | 88635853  | 88635892  | BMPR1A_11266 | + | GTGACCTATGCACCAGACGTTTCATTTTAGTAATGTATGTGTATATAAAAAAGCACTAAGATCGGAAGAGCGGTTCCAG          |
| chr10 | 88649992  | 88650031  | BMPR1A_11267 | + | GTGACCTATGCACCAGACGTTATGCAGCCCTCTTAAAGAGTTAGGAGAAATAGAGTTGCATAGATCGGAAGAGCGGTTCCAG       |
| chr10 | 88651997  | 88652036  | BMPR1A_11268 | + | GTGACCTATGCACCAGACGTTATTTGGGACCCATGAGACAAAAGAGGGAGGGCCATATGAAGATCGGAAGAGCGGTTCCAG        |
| chr10 | 88659658  | 88659697  | BMPR1A_11269 | + | GTGACCTATGCACCAGACGTCGAGAAAAGTCGGAGCATGCTTTCTCAAAATATCTTCTCTGGAGATCGGAAGAGCGGTTCCAG      |
| chr10 | 88659894  | 88659933  | BMPR1A_11270 | + | GTGACCTATGCACCAGACGTTATTTTTGAAGCAAATATTTTGCAAAATATTAGATGATCGGAAGAGCGGTTCCAG              |
| chr10 | 88672152  | 88672191  | BMPR1A_11271 | + | GTGACCTATGCACCAGACGTCGTTTCTATAGACATGAATGGTGTGTTGATTTAGAATGTGAGATCGGAAGAGCGGTTCCAG        |
| chr10 | 88677094  | 88677133  | BMPR1A_11272 | + | GTGACCTATGCACCAGACGTTACTGATTCAGTCAATTTTCTTTTTGACAAGGCTAGTGAGGAGATCGGAAGAGCGGTTCCAG       |
| chr10 | 88679237  | 88679276  | BMPR1A_11273 | + | GTGACCTATGCACCAGACGTTTGGCCCCACTGTTTTGAAATATTTTAAATTTCCAAAAGAGATCGGAAGAGCGGTTCCAG         |
| chr10 | 88681463  | 88681502  | BMPR1A_11274 | + | GTGACCTATGCACCAGACGTTGAGTAGTCTGATTATGTTGATTTACTCATTTTTAAAGATCGGAAGAGCGGTTCCAG            |
| chr10 | 88683274  | 88683313  | BMPR1A_11275 | + | GTGACCTATGCACCAGACGTTCTCAGTCCCCTGAAGAAGTATTGTAATGCTGAAATGCCACCAATAGATCGGAAGAGCGGTTCCAG   |
| chr10 | 88683487  | 88683526  | BMPR1A_11276 | + | GTGACCTATGCACCAGACGTTCAAAGGTACAGAAATGAGAAATGAGACAAAGGCTGTTTTTACCAGATCGGAAGAGCGGTTCCAG    |
| chr3  | 48200586  | 48200625  | CDC25A_11277 | + | GTGACCTATGCACCAGACGTTAGGAGAGAATAAGGTTAGGGTACACCTGCCTCACACCCACAGATCGGAAGAGCGGTTCCAG       |
| chr3  | 48200956  | 48200995  | CDC25A_11278 | + | GTGACCTATGCACCAGACGTTGAAGGAAGGCCAAAGCAGGGTTAGCTTTCCAGCACAGCAAGATCGGAAGAGCGGTTCCAG        |
| chr3  | 48205938  | 48205977  | CDC25A_11279 | + | GTGACCTATGCACCAGACGTTAACAGAGACCCCTTGAACCTGCACGTTTCACACATGAAGTAGATCGGAAGAGCGGTTCCAG       |
| chr3  | 48207235  | 48207274  | CDC25A_11280 | + | GTGACCTATGCACCAGACGTTAAATTAGGAGAAATCAACTTTGACCCTCAGGGAAAACCTAAGATCGGAAGAGCGGTTCCAG       |
| chr3  | 48207394  | 48207433  | CDC25A_11281 | + | GTGACCTATGCACCAGACGTTAAAAGATACTAGAGAATCTGAAAGCCTATATATAGATCGGAAGAGCGGTTCCAG              |
| chr3  | 48209445  | 48209484  | CDC25A_11282 | + | GTGACCTATGCACCAGACGTTCAAAGGTACAGAAATGAGAAATGAGACAAAGGCTGTTTTGAACTTTAGATCGGAAGAGCGGTTCCAG |
| chr3  | 48215958  | 48215997  | CDC25A_11283 | + | GTGACCTATGCACCAGACGTTAAAAACAGACAGACCCATCTTTCATTAACCTGTTTCACAGATCGGAAGAGCGGTTCCAG         |
| chr3  | 48218943  | 48218982  | CDC25A_11284 | + | GTGACCTATGCACCAGACGTTAGTGAAGAAAACCTGATTTTTAAAAAGAGCCTGTAGAGACTAACATAGATCGGAAGAGCGGTTCCAG |
| chr3  | 48219489  | 48219528  | CDC25A_11285 | + | GTGACCTATGCACCAGACGTTAAATTCATGGATTATAATGAGAGCTCTGATCCACTTTCAAGATCGGAAGAGCGGTTCCAG        |
| chr3  | 48222341  | 48222380  | CDC25A_11286 | + | GTGACCTATGCACCAGACGTTAGTTGAGACACTACTGTCCATGAAAACCAACTCAGGCCAGATCGGAAGAGCGGTTCCAG         |
| chr3  | 48224531  | 48224570  | CDC25A_11287 | + | GTGACCTATGCACCAGACGTTAAAAGGAAAATAATTAAGGACACAAAATAAAATTTAGATCGGAAGAGCGGTTCCAG            |
| chr3  | 48225337  | 48225376  | CDC25A_11288 | + | GTGACCTATGCACCAGACGTTATCAGAAGGTAATAATGAGAATAAAAACAAGTAAAGAGGTAGATCGGAAGAGCGGTTCCAG       |
| chr3  | 48226196  | 48226235  | CDC25A_11289 | + | GTGACCTATGCACCAGACGTTAAAAAACCTCTCAAGAAATAATCAAAAAACACCATTTAGATCGGAAGAGCGGTTCCAG          |
| chr3  | 48228280  | 48228319  | CDC25A_11290 | + | GTGACCTATGCACCAGACGTCAGAATAAACCCATGAATGATTTATAGGATATAATTAAGATCGGAAGAGCGGTTCCAG           |
| chr2  | 175665026 | 175665065 | CHN1_11291   | + | GTGACCTATGCACCAGACGTTCAAGTACAGGAATAAATGACTTTGTGTAAGCCATATGTTTCAGATCGGAAGAGCGGTTCCAG      |
| chr2  | 175666551 | 175666590 | CHN1_11292   | + | GTGACCTATGCACCAGACGTTAAGTGAATACCAAGAAGAAAAGAAAATAACACAAAACCTGAAGATCGGAAGAGCGGTTCCAG      |
| chr2  | 175673781 | 175673820 | CHN1_11293   | + | GTGACCTATGCACCAGACGTTTGAAGAAAATAAAAAGTAAATATCTGATTTACAGGACAGATCGGAAGAGCGGTTCCAG          |
| chr2  | 175676327 | 175676366 | CHN1_11294   | + | GTGACCTATGCACCAGACGTTAACTAGTTAGTTTTCTTTGAATTATGCCTTTTCTTCAGATAGATCGGAAGAGCGGTTCCAG       |
| chr2  | 175677221 | 175677260 | CHN1_11295   | + | GTGACCTATGCACCAGACGTTAATAAGAAAGGAAACATTCATATATTTTTCAGAGTTTATAGATCGGAAGAGCGGTTCCAG        |
| chr2  | 175689257 | 175689296 | CHN1_11296   | + | GTGACCTATGCACCAGACGTTAAAAGAGGGGCAAAGTCAAGGAAAGGGGAAACACACGGATGAGATCGGAAGAGCGGTTCCAG      |
| chr2  | 175711696 | 175711735 | CHN1_11297   | + | GTGACCTATGCACCAGACGTTGCAAAGAGTTTTAGAGGTTCCAGAGTTGTACAGACCTAGATCGGAAGAGCGGTTCCAG          |
| chr2  | 175742867 | 175742906 | CHN1_11298   | + | GTGACCTATGCACCAGACGTTAAAGTGGAAAGATGTTTTAAAGAAAGTAAGCAACTGAAAGATCGGAAGAGCGGTTCCAG         |
| chr2  | 175779910 | 175779949 | CHN1_11299   | + | GTGACCTATGCACCAGACGTTAAGTCTATTTCAGAAACTGTGCTTTCTACATTTTTCAATAAAGATCGGAAGAGCGGTTCCAG      |
| chr2  | 175783304 | 175783343 | CHN1_11300   | + | GTGACCTATGCACCAGACGTTAGCAAAAAAACAGGCATATTTGAAAAATGCAAAATGTGCAAGATCGGAAGAGCGGTTCCAG       |
| chr2  | 175809682 | 175809721 | CHN1_11301   | + | GTGACCTATGCACCAGACGTTGAGAAACAAAAGTGTCAATGTCCCTTACATAGAACTTAAGATCGGAAGAGCGGTTCCAG         |
| chr2  | 175816941 | 175816980 | CHN1_11302   | + | GTGACCTATGCACCAGACGTTAAACATCAAATTAACATTACTGAATATTTAAATTTAAATAGATCGGAAGAGCGGTTCCAG        |
| chr2  | 175869651 | 175869690 | CHN1_11303   | + | GTGACCTATGCACCAGACGTTCCGCGCCCGCCGAGTCCAGCGCTCCTCCCAGGCGGAGATCGGAAGAGCGGTTCCAG            |
| chr12 | 57910974  | 57911013  | DDIT3_11304  | + | GTGACCTATGCACCAGACGTTAGGAAAGGGAACATAGATATAGTGAAGAAAGGAAAGATCGGAAGAGCGGTTCCAG             |
| chr12 | 57911200  | 57911239  | DDIT3_11305  | + | GTGACCTATGCACCAGACGTTGGATCAGTCTGAAAAGCACATCTGCAGGATAATGGGGAGAGATCGGAAGAGCGGTTCCAG        |
| chr3  | 185867988 | 185868027 | DGKG_11306   | + | GTGACCTATGCACCAGACGTTAGAGGCAGAAATGAATAGTGGCATGCAAACTCAGTAGCAGATCGGAAGAGCGGTTCCAG         |
| chr3  | 185879463 | 185879502 | DGKG_11307   | + | GTGACCTATGCACCAGACGTTGAACACCAAGAGAACAACAGTGAGCTTTTTCAAGTGGGAGAGATCGGAAGAGCGGTTCCAG       |
| chr3  | 185882818 | 185882857 | DGKG_11308   | + | GTGACCTATGCACCAGACGTTAGACAGCAAAAGTAGTGATACACATCTCTGTCTTCAAGATCGGAAGAGCGGTTCCAG           |
| chr3  | 185906179 | 185906218 | DGKG_11309   | + | GTGACCTATGCACCAGACGTTAGAGAAAAGGCACTGTTAGTGTCTTACTAGTGTGTCAACAAGATCGGAAGAGCGGTTCCAG       |
| chr3  | 185929685 | 185929724 | DGKG_11310   | + | GTGACCTATGCACCAGACGTTAAGCAGAGAGATGCTCAATATTCACATTTGAAATGCTCAGATCGGAAGAGCGGTTCCAG         |

|      |           |           |             |   |                                                                                       |
|------|-----------|-----------|-------------|---|---------------------------------------------------------------------------------------|
| chr3 | 185960368 | 185960407 | DGKG_11311  | + | GTGACCTATGCACCAGACGTAAAGAGACAAAGCAGATCCTTGGTGAGTGGTCATGACAGTGAAGATCGGAAGAGCGGTTTCAG   |
| chr3 | 185969719 | 185969758 | DGKG_11312  | + | GTGACCTATGCACCAGACGTCAGCACTGCATTTGCCACCACAGCAGAAAGGCTGTATTCATAGATCGGAAGAGCGGTTTCAG    |
| chr3 | 185970982 | 185971021 | DGKG_11313  | + | GTGACCTATGCACCAGACGTCACAGAGGAACAGAGAACCATATGCCATGGGACTGTAGAAAGATCGGAAGAGCGGTTTCAG     |
| chr3 | 185975739 | 185975778 | DGKG_11314  | + | GTGACCTATGCACCAGACGTGAAGAAAGGCCAAAATGGGCTTGTTACTAGTTCGACAGTGAAGATCGGAAGAGCGGTTTCAG    |
| chr3 | 185979578 | 185979617 | DGKG_11315  | + | GTGACCTATGCACCAGACGTTAAAAGAAAAGAAATAGTCTGCTTCATCCAATAGGGGGAGATCGGAAGAGCGGTTTCAG       |
| chr3 | 185983106 | 185983145 | DGKG_11316  | + | GTGACCTATGCACCAGACGTAAAGGAAAAGCAAGCATCTTTTGGAAAAAGAGCCTAACAGATCGGAAGAGCGGTTTCAG       |
| chr3 | 185985677 | 185985616 | DGKG_11317  | + | GTGACCTATGCACCAGACGTAAATGAAAAAGAGAGTGAAGTGAAAGTAGCAAAGAAAACATAGATCGGAAGAGCGGTTTCAG    |
| chr3 | 185986717 | 185986756 | DGKG_11318  | + | GTGACCTATGCACCAGACGTGAAGCGAACGATGCCAGGAAAATGGCAGAACCATGTCCCAGATCGGAAGAGCGGTTTCAG      |
| chr3 | 185990143 | 185990182 | DGKG_11319  | + | GTGACCTATGCACCAGACGTAAAAAGTCAAGGCAGGTGCTTGTGAATAGCCAGCTAGGAAAAGATCGGAAGAGCGGTTTCAG    |
| chr3 | 185993464 | 185993503 | DGKG_11320  | + | GTGACCTATGCACCAGACGTAATAGGAGGTGAGACCCCAAGCTGGCTGCCCTGAGATGGAAGATCGGAAGAGCGGTTTCAG     |
| chr3 | 185997773 | 185997812 | DGKG_11321  | + | GTGACCTATGCACCAGACGTCAAAGAGCAATCATTGTCCATTTTCATCATCGACATGTCTAGATCGGAAGAGCGGTTTCAG     |
| chr3 | 185998544 | 185998583 | DGKG_11322  | + | GTGACCTATGCACCAGACGTGCAAAGGGAGAAAATCAAAGTGACACAACAGAGATGTAGATCGGAAGAGCGGTTTCAG        |
| chr3 | 186002509 | 186002548 | DGKG_11323  | + | GTGACCTATGCACCAGACGTCAACAGAGGTAAGCCTTGAAGTGCCCTTAAGAAGCGCGGAGATCGGAAGAGCGGTTTCAG      |
| chr3 | 186006680 | 186006719 | DGKG_11324  | + | GTGACCTATGCACCAGACGTCAAAGGAAAACATCCAAGGACATTTTCTGTTTAGTAAATAGATCGGAAGAGCGGTTTCAG      |
| chr3 | 186015283 | 186015322 | DGKG_11325  | + | GTGACCTATGCACCAGACGTAAAAGAAGATTTAAAGACCAACCCAGGCCCTCTAGCTTCTAGATCGGAAGAGCGGTTTCAG     |
| chr3 | 186024777 | 186024816 | DGKG_11326  | + | GTGACCTATGCACCAGACGTACAAATTCACATGTGAAACACTGGCAAATAGCTAATGGAAGAGATCGGAAGAGCGGTTTCAG    |
| chr3 | 186038259 | 186038298 | DGKG_11327  | + | GTGACCTATGCACCAGACGTTATGTGAGTGGCTAAAGGGCAGTGATGGAGTTTGTTCACAGATCGGAAGAGCGGTTTCAG      |
| chr8 | 120569942 | 120569981 | ENPP2_11328 | + | GTGACCTATGCACCAGACGTAAACAGAAAAATCAGAATCGAATTTTCCAGAGGAGTTTAGATCGGAAGAGCGGTTTCAG       |
| chr8 | 120575264 | 120575303 | ENPP2_11329 | + | GTGACCTATGCACCAGACGTGAAGTAAAACGAAGTACAGTTGATGAGTTGATGTTGAAGAGATCGGAAGAGCGGTTTCAG      |
| chr8 | 120577206 | 120577245 | ENPP2_11330 | + | GTGACCTATGCACCAGACGTACAAAAATCCAAAAATCAATTTATTCATGAAGAAAACCTCTAGATCGGAAGAGCGGTTTCAG    |
| chr8 | 120580503 | 120580542 | ENPP2_11331 | + | GTGACCTATGCACCAGACGTGGAAAACAAATAGTATACGTTGCTTACCAAATCTATATCAGATCGGAAGAGCGGTTTCAG      |
| chr8 | 120581621 | 120581660 | ENPP2_11332 | + | GTGACCTATGCACCAGACGTGTGACAGGGCACTCAGCAATGCCGTGGCTCTGTTACGAACGAGATCGGAAGAGCGGTTTCAG    |
| chr8 | 120583092 | 120583131 | ENPP2_11333 | + | GTGACCTATGCACCAGACGTAAAAAAATAACTGTGTTAGTGCATATAAATTTTACATAGATCGGAAGAGCGGTTTCAG        |
| chr8 | 120592418 | 120592457 | ENPP2_11334 | + | GTGACCTATGCACCAGACGTGAAAACCAAGTAAAGGAAAAGAAAGCAAAATCAGAAATGTAGATCGGAAGAGCGGTTTCAG     |
| chr8 | 120594853 | 120594892 | ENPP2_11335 | + | GTGACCTATGCACCAGACGTAAAAGAAAAGGAGGCGAGGTGCTTCTTATATTTTTTTTATGATGAGATCGGAAGAGCGGTTTCAG |
| chr8 | 120596055 | 120596094 | ENPP2_11336 | + | GTGACCTATGCACCAGACGTAAAAGAAAAACAAAACAGTAAAGCATTGTTAGGTAGGAAAAGATCGGAAGAGCGGTTTCAG     |
| chr8 | 120596300 | 120596339 | ENPP2_11337 | + | GTGACCTATGCACCAGACGTACAAATTCATGATTAGTTAGAATTTCTCATGAAATTACTTAGATCGGAAGAGCGGTTTCAG     |
| chr8 | 120598564 | 120598603 | ENPP2_11338 | + | GTGACCTATGCACCAGACGTAATGAAATCAGACTTCAAGTGAATGTCTTTTGGAAAAAGATCGGAAGAGCGGTTTCAG        |
| chr8 | 120599326 | 120599365 | ENPP2_11339 | + | GTGACCTATGCACCAGACGTAGAGGAGAAAGATTTCAAAGAAATAACAACCATACCAAAGATCGGAAGAGCGGTTTCAG       |
| chr8 | 120602881 | 120602920 | ENPP2_11340 | + | GTGACCTATGCACCAGACGTGGAGAAAAGAAATTTTTCAAGCAAGACTAAAACGAAAATAGATCGGAAGAGCGGTTTCAG      |
| chr8 | 120606111 | 120606150 | ENPP2_11341 | + | GTGACCTATGCACCAGACGTGAAGCAAGTTAGTCCCCACAGGGTTTTCTTTCTTTCCCTTAGATCGGAAGAGCGGTTTCAG     |
| chr8 | 120608253 | 120608292 | ENPP2_11342 | + | GTGACCTATGCACCAGACGTGGATAGAGATGTCTGGACTCAGAAGTCGTCTGTCCCTCTGAGATCGGAAGAGCGGTTTCAG     |
| chr8 | 120613001 | 120613040 | ENPP2_11343 | + | GTGACCTATGCACCAGACGTATTGGAAGGTTCAAGATCTCTCTAAACACATGTAACAAGATCGGAAGAGCGGTTTCAG        |
| chr8 | 120613713 | 120613752 | ENPP2_11344 | + | GTGACCTATGCACCAGACGTAAAGCAAAGCAAGCATGTTGTAGTTCATTTCCGCAAAAAGATCGGAAGAGCGGTTTCAG       |
| chr8 | 120620228 | 120620267 | ENPP2_11345 | + | GTGACCTATGCACCAGACGTAAAATATAAGCCGCTTAAAATGTGGTCTGTGTTTTTTGTCAAAGATCGGAAGAGCGGTTTCAG   |
| chr8 | 120628635 | 120628674 | ENPP2_11346 | + | GTGACCTATGCACCAGACGTAAAGCAAATTTATTGTTAAAATAACAATACATAATCCACAAGATCGGAAGAGCGGTTTCAG     |
| chr8 | 120629494 | 120629533 | ENPP2_11347 | + | GTGACCTATGCACCAGACGTAATGCAATATTAGAACAAGAGAACCAACAGGAATTGCTAGATCGGAAGAGCGGTTTCAG       |
| chr8 | 120629814 | 120629853 | ENPP2_11348 | + | GTGACCTATGCACCAGACGTAAACATTAAGCTTTTAGAAAACATTATACCAGAGTTGCCAGATCGGAAGAGCGGTTTCAG      |
| chr8 | 120631555 | 120631594 | ENPP2_11349 | + | GTGACCTATGCACCAGACGTAATGGGTAATGTATTGTTGAATTAATACAAATGCCAAGATCGGAAGAGCGGTTTCAG         |
| chr8 | 120633770 | 120633809 | ENPP2_11350 | + | GTGACCTATGCACCAGACGTCCTCAATAAAACATTTCACTGCTGCACACTAACCAATGAAGATCGGAAGAGCGGTTTCAG      |
| chr8 | 120638971 | 120639010 | ENPP2_11351 | + | GTGACCTATGCACCAGACGTCAAAGAGCAAACAAAACAGTGAAGAGTGGTCAATGTACAGATCGGAAGAGCGGTTTCAG       |
| chr8 | 120650778 | 120650817 | ENPP2_11352 | + | GTGACCTATGCACCAGACGTAAAGAGACCAAGTTGTCAAATACAGCTGGAGAAGACTAAAAGATCGGAAGAGCGGTTTCAG     |
| chr8 | 120651031 | 120651070 | ENPP2_11353 | + | GTGACCTATGCACCAGACGTCTGGAAAGCCTTTTGCAGCGTGTCTCTTTGCCTTACGAGATCGGAAGAGCGGTTTCAG        |
| chr1 | 16456925  | 16456964  | EPHA2_11354 | + | GTGACCTATGCACCAGACGTACGAAGGTCAAGGGCGCTGTTGCAGAAAGCCACTGAAACCAGATCGGAAGAGCGGTTTCAG     |
| chr1 | 16458376  | 16458415  | EPHA2_11355 | + | GTGACCTATGCACCAGACGTCCCAGGCCAGTACCACACTGTGCCCTCTGGCTGGCCCCAGAGATCGGAAGAGCGGTTTCAG     |
| chr1 | 16458779  | 16458818  | EPHA2_11356 | + | GTGACCTATGCACCAGACGTACAGGCCTACGCTCAGTGCAGGCCACCCCTGAACCCGCGAGGATCGGAAGAGCGGTTTCAG     |
| chr1 | 16459874  | 16459913  | EPHA2_11357 | + | GTGACCTATGCACCAGACGTACAGGGTCAAGGGAGTGCCTGGTCAAGCCCGCATGAGGAGATCGGAAGAGCGGTTTCAG       |
| chr1 | 16460112  | 16460151  | EPHA2_11358 | + | GTGACCTATGCACCAGACGTAAGGGTGGGGTACAGGCAGCTCAGGAGGGGCCCATGGAGATCGGAAGAGCGGTTTCAG        |
| chr1 | 16460421  | 16460460  | EPHA2_11359 | + | GTGACCTATGCACCAGACGTCCCACGGGGAACCAATGCAGGGAGGTCAAGAGTCTGCAGATCGGAAGAGCGGTTTCAG        |
| chr1 | 16461073  | 16461112  | EPHA2_11360 | + | GTGACCTATGCACCAGACGTAATCAGCTGATGACAAGGGAGTTCCCCACAATACAGAGATCGGAAGAGCGGTTTCAG         |
| chr1 | 16461695  | 16461734  | EPHA2_11361 | + | GTGACCTATGCACCAGACGTGTGGCCGCGGAGGAGCAGGCGAGTGAAGGCGGCAGGGCAGGAGATCGGAAGAGCGGTTTCAG    |
| chr1 | 16462276  | 16462315  | EPHA2_11362 | + | GTGACCTATGCACCAGACGTGAGGAGGGTGGGGTAAAGTGGGTAAGAGTGCCTACAGCAAGATCGGAAGAGCGGTTTCAG      |
| chr1 | 16464691  | 16464730  | EPHA2_11363 | + | GTGACCTATGCACCAGACGTAGGAGGAGTCAAGTGTGCTGGTGGACCCAGGGCAGACGTCAGATCGGAAGAGCGGTTTCAG     |
| chr1 | 16464936  | 16464975  | EPHA2_11364 | + | GTGACCTATGCACCAGACGTGAGGACAGACAGACACAAGGACATCAGTTCAATCTGCTTAGATCGGAAGAGCGGTTTCAG      |
| chr1 | 16475553  | 16475592  | EPHA2_11365 | + | GTGACCTATGCACCAGACGTAAAGATACAGGTTAGTGTGGGCAAGTGCCTGGGGAACTGAAGATCGGAAGAGCGGTTTCAG     |
| chr1 | 16477469  | 16477508  | EPHA2_11366 | + | GTGACCTATGCACCAGACGTGAAGGGAGGGGGTGAAGCTGGGGTGTCTTCAAGAGTCAAGATCGGAAGAGCGGTTTCAG       |
| chr1 | 16482438  | 16482477  | EPHA2_11367 | + | GTGACCTATGCACCAGACGTTCCGCTCCGCTCCGCCAGCCGCTCCCGGAGATCGGAAGAGCGGTTTCAG                 |
| chr1 | 16475218  | 16475257  | EPHA2_11368 | + | GTGACCTATGCACCAGACGTGGCGTGCCTCGAAGTGCCTGCTGAGCGGTGATCTCATCGGGAGATCGGAAGAGCGGTTTCAG    |

|       |           |           |             |   |                                                                                      |
|-------|-----------|-----------|-------------|---|--------------------------------------------------------------------------------------|
| chr21 | 40182041  | 40182080  | ETS2_11369  | + | GTGACCTATGCACCAGACGTAAGTCTTAATTTTTTTTTTAAATGGAAACTCGATCTCTAGATCGGAAGAGCGGTTTCAG      |
| chr21 | 40185049  | 40185088  | ETS2_11370  | + | GTGACCTATGCACCAGACGCTCCTCAGACTTGACAATTTGTGCATGATTTTTCTAAGTAGTAGATCGGAAGAGCGGTTTCAG   |
| chr21 | 40186327  | 40186366  | ETS2_11371  | + | GTGACCTATGCACCAGACGCTTTCTGAGCCTGCAGTGGTGAGAAGAACCACTTCAGAGATCGGAAGAGCGGTTTCAG        |
| chr21 | 40186916  | 40186955  | ETS2_11372  | + | GTGACCTATGCACCAGACGTAACGTCTTACTTCTCCTTTGCCAGGATGAGCTGTGGCCGGAGATCGGAAGAGCGGTTTCAG    |
| chr21 | 40189026  | 40189065  | ETS2_11373  | + | GTGACCTATGCACCAGACGTTTGATCTGCCCTTAAGAACTTTGTCTTCCAGTCTTCCCAGAGATCGGAAGAGCGGTTTCAG    |
| chr21 | 40190581  | 40190620  | ETS2_11374  | + | GTGACCTATGCACCAGACGTAAGCATCTTTCAACAAGGCTGTTGCTTTGATTCTGAGAACAGATCGGAAGAGCGGTTTCAG    |
| chr21 | 40191701  | 40191740  | ETS2_11375  | + | GTGACCTATGCACCAGACGTAACCTCCGAGACTGCGCCCTGGCCCGACTCTCTGGGTCTGTCCAGATCGGAAGAGCGGTTTCAG |
| chr21 | 40193639  | 40193678  | ETS2_11376  | + | GTGACCTATGCACCAGACGTAGCCCTGGGAAATCTCTGGGCTTGAACCTGATTTCCCTGAGATCGGAAGAGCGGTTTCAG     |
| chr21 | 40194824  | 40194863  | ETS2_11377  | + | GTGACCTATGCACCAGACGTACCACCCTGAGCCGGCCCCAGGCTCGTGGACTGAGTGGGAAGATCGGAAGAGCGGTTTCAG    |
| chr3  | 59738058  | 59738097  | FHIT_11378  | + | GTGACCTATGCACCAGACGTAAAAAAGGAAGAGGCTCTTTTCATGGGCCCTTGGGATCTCAGATCGGAAGAGCGGTTTCAG    |
| chr3  | 59908151  | 59908190  | FHIT_11379  | + | GTGACCTATGCACCAGACGTACAAGAAAGAAAAAAATGTGATTATCTCCCCATGATTTAGATCGGAAGAGCGGTTTCAG      |
| chr3  | 59997137  | 59997176  | FHIT_11380  | + | GTGACCTATGCACCAGACGTGAAAAACAACAGAGGTGAGAATAGATAGATGGTATCTCAGATCGGAAGAGCGGTTTCAG      |
| chr3  | 59999889  | 59999928  | FHIT_11381  | + | GTGACCTATGCACCAGACGTGCTGTTAAGGCCCATGCTGTGCTGGCTTTGGGTAGTGTTCTAGATCGGAAGAGCGGTTTCAG   |
| chr3  | 60522706  | 60522745  | FHIT_11382  | + | GTGACCTATGCACCAGACGTTTGAAGTCTAAAAAGAAAGACAATGGATAGTTATAAAATTAGATCGGAAGAGCGGTTTCAG    |
| chr15 | 91419158  | 91419197  | FURIN_11383 | + | GTGACCTATGCACCAGACGTCCCCACAGGACACTGCCAGGGGGTGGGACCAGAGAAGACAAGATCGGAAGAGCGGTTTCAG    |
| chr15 | 91419594  | 91419633  | FURIN_11384 | + | GTGACCTATGCACCAGACGTCCCCAGCCCCCTCTGCTGCCACCCTCCCCCTCCTGCTCAGATCGGAAGAGCGGTTTCAG      |
| chr15 | 91419798  | 91419837  | FURIN_11385 | + | GTGACCTATGCACCAGACGTTTTCTTCCGCTGCTGGGACCTCTCCCCAGATGCACCATCAAGATCGGAAGAGCGGTTTCAG    |
| chr15 | 91420265  | 91420304  | FURIN_11386 | + | GTGACCTATGCACCAGACGTGCTGGGGAGGGGCGGTGACTCCCTGCTGAGTGTGTCTAGAAAGATCGGAAGAGCGGTTTCAG   |
| chr15 | 91420452  | 91420491  | FURIN_11387 | + | GTGACCTATGCACCAGACGTGCAGGCCCCGGTCTCTGCCCTCCCTTCTCTTTCTCCACTAGATCGGAAGAGCGGTTTCAG     |
| chr15 | 91420856  | 91420895  | FURIN_11388 | + | GTGACCTATGCACCAGACGTGCCCTGGGCCACCCTGTCTTCAGGAGGGCCCTTCCAGTGGAAAGATCGGAAGAGCGGTTTCAG  |
| chr15 | 91421545  | 91421584  | FURIN_11389 | + | GTGACCTATGCACCAGACGTGATCTGTCCAGCCCTGCGGGCAGGTTGGGTGCTGTCTTCCAGATCGGAAGAGCGGTTTCAG    |
| chr15 | 91422217  | 91422256  | FURIN_11390 | + | GTGACCTATGCACCAGACGTCTGGGGTGGGGGCTGGGGAGATGGGGCTGTGGCTGGCAGATCGGAAGAGCGGTTTCAG       |
| chr15 | 91422785  | 91422824  | FURIN_11391 | + | GTGACCTATGCACCAGACGTGGGGCCAGCGGCAACCTGTCCCTACCAGACTCTCTGATGATCGGAAGAGCGGTTTCAG       |
| chr15 | 91423015  | 91423054  | FURIN_11392 | + | GTGACCTATGCACCAGACGTGCTGGCCCGGACCTGATCGGTGAGTTAGGTAGAAGCAAGATCGGAAGAGCGGTTTCAG       |
| chr15 | 91423225  | 91423264  | FURIN_11393 | + | GTGACCTATGCACCAGACGTGACCCAGGCTGGGAGGGGCCAGTGGGACCTGAGAGTGCAGATCGGAAGAGCGGTTTCAG      |
| chr15 | 91423514  | 91423553  | FURIN_11394 | + | GTGACCTATGCACCAGACGTGCTCCCTGCCCGCCCTGCCACGCGCCCGCTCTCACAGATCGGAAGAGCGGTTTCAG         |
| chr15 | 91424056  | 91424095  | FURIN_11395 | + | GTGACCTATGCACCAGACGTCACTTGAAGGGTAGGGGTACGAGGTGGAGGGCTGGCAGGAAGATCGGAAGAGCGGTTTCAG    |
| chr15 | 91424281  | 91424320  | FURIN_11396 | + | GTGACCTATGCACCAGACGTGGTGCTGTTGGGCTTTGGGGCCCTGAGTCTGGGGTAAAGGATCGGAAGAGCGGTTTCAG      |
| chr15 | 91425119  | 91425158  | FURIN_11397 | + | GTGACCTATGCACCAGACGTGCCACCCCTCAAGCCTACCCTCTTGGGCACCTTTAGATCGGAAGAGCGGTTTCAG          |
| chr15 | 91424822  | 91424861  | FURIN_11398 | + | GTGACCTATGCACCAGACGTGCGGGCAACCGCTGCGGGCAGGGCTGCTGCCCTCACACTAGATCGGAAGAGCGGTTTCAG     |
| chr22 | 24376628  | 24376667  | GSTT1_11399 | + | GTGACCTATGCACCAGACGTAAGGGTACAGACTGGGGATGGATGGTTGTGAGGGCAGGGAAAGATCGGAAGAGCGGTTTCAG   |
| chr22 | 24379522  | 24379561  | GSTT1_11400 | + | GTGACCTATGCACCAGACGTGGGGTTCATGATGGGTAAAGGAAGGGCACTGTGCTGGGTAAAGATCGGAAGAGCGGTTTCAG   |
| chr22 | 24381798  | 24381837  | GSTT1_11401 | + | GTGACCTATGCACCAGACGTTCCAGCATGGTGGGTGGTGGGAGGAGAAGCTGAGCCCGCAGATCGGAAGAGCGGTTTCAG     |
| chr22 | 24384242  | 24384281  | GSTT1_11402 | + | GTGACCTATGCACCAGACGTGCCAGCCTGACCGGAAACCAGGGGATCAGCAAACTCCAGATCGGAAGAGCGGTTTCAG       |
| chr5  | 141001115 | 141001154 | HDAC3_11403 | + | GTGACCTATGCACCAGACGTAGGGAGAGAGTGCAGTCACTCTAAGTTCTAATCTTAGATCGGAAGAGCGGTTTCAG         |
| chr5  | 141004943 | 141004982 | HDAC3_11404 | + | GTGACCTATGCACCAGACGTATGAGGAATACAGAGTGAGCAGTTTCCAGAGATTTCCAGAGATCGGAAGAGCGGTTTCAG     |
| chr5  | 141005342 | 141005381 | HDAC3_11405 | + | GTGACCTATGCACCAGACGTAGAGGAGAAAGTATGGCTCAGACTGAGAAAGGCAGCTAACAGATCGGAAGAGCGGTTTCAG    |
| chr5  | 141005649 | 141005688 | HDAC3_11406 | + | GTGACCTATGCACCAGACGTCCAGCAGAGGGGAGCAGGCTGACCAGTGGGCTGAAGGACAGATCGGAAGAGCGGTTTCAG     |
| chr5  | 141005861 | 141005900 | HDAC3_11407 | + | GTGACCTATGCACCAGACGTGAACCAGAGGAAGATGTGGAGGAGTTATCAAAAGACAAGAGATCGGAAGAGCGGTTTCAG     |
| chr5  | 141007535 | 141007574 | HDAC3_11408 | + | GTGACCTATGCACCAGACGTCAAACCCAGGAAAAGTGCAGTATCAGAAGATCGGAAGAGCGGTTTCAG                 |
| chr5  | 141007765 | 141007804 | HDAC3_11409 | + | GTGACCTATGCACCAGACGTGCAAAAGATGGGCACTGCCACCCCAAGGGGATGGGGAGAAGATCGGAAGAGCGGTTTCAG     |
| chr5  | 141008217 | 141008256 | HDAC3_11410 | + | GTGACCTATGCACCAGACGTGTTGGTGGTGGTAGCCACACATGGGAAGCACCACAACCCAGATCGGAAGAGCGGTTTCAG     |
| chr5  | 141008884 | 141008923 | HDAC3_11411 | + | GTGACCTATGCACCAGACGTGCCAAAGCCAGGGTCTGAGCTAGAAGTGAACCCCCAACCCAGATCGGAAGAGCGGTTTCAG    |
| chr5  | 141009317 | 141009356 | HDAC3_11412 | + | GTGACCTATGCACCAGACGTACAGTGGTCTATAAAGAGAAGAGCAATTTCCCCTCCCAGCAGATCGGAAGAGCGGTTTCAG    |
| chr5  | 141009494 | 141009533 | HDAC3_11413 | + | GTGACCTATGCACCAGACGTAACACCTAAGTACAGTCTTCTCCAGCCCTCAAGCTAGATCGGAAGAGCGGTTTCAG         |
| chr5  | 141009703 | 141009742 | HDAC3_11414 | + | GTGACCTATGCACCAGACGTGAGGAACAAGTTGGAACCTCTGCCCTCTGTCTGGGCCCTAGATCGGAAGAGCGGTTTCAG     |
| chr5  | 141014531 | 141014570 | HDAC3_11415 | + | GTGACCTATGCACCAGACGTAGACACAAGATGAACCCAGGCAGGGTCCAGCCCCCAGATCGGAAGAGCGGTTTCAG         |
| chr5  | 141016208 | 141016247 | HDAC3_11416 | + | GTGACCTATGCACCAGACGTGGAGAAGAGAGTTCGTGAGTCTCACCCCTGGAGTTGCAAAGATCGGAAGAGCGGTTTCAG     |
| chr19 | 10381913  | 10381952  | ICAM1_11417 | + | GTGACCTATGCACCAGACGTGTGGGGATTGCCGTCGGGCCAGTTCTCCGAAGCCCCGGGAAGATCGGAAGAGCGGTTTCAG    |
| chr19 | 10385715  | 10385754  | ICAM1_11418 | + | GTGACCTATGCACCAGACGTGAGCCCGGAGGGCTGGACTAGGCCAGCCCGGTTGGGAGAGAAGATCGGAAGAGCGGTTTCAG   |
| chr19 | 10394473  | 10394512  | ICAM1_11419 | + | GTGACCTATGCACCAGACGTAAGAAGCCAGCAGGGAGAAGTTGGAGGCTGGGGTATCCTGCAGATCGGAAGAGCGGTTTCAG   |
| chr19 | 10395007  | 10395046  | ICAM1_11420 | + | GTGACCTATGCACCAGACGTGCCAGGGGCGAGTGGGGTCTTCTGGGGTGTGACATCGGAAGAGCGGTTTCAG             |
| chr19 | 10395344  | 10395383  | ICAM1_11421 | + | GTGACCTATGCACCAGACGTCTGCTGGTCAATGGCCCTATCCCCCAAGGCCCAATCTCCAGATCGGAAGAGCGGTTTCAG     |
| chr19 | 10395715  | 10395754  | ICAM1_11422 | + | GTGACCTATGCACCAGACGTGCGCGGGCAGAGCTGGGTGGGGCAGGGCCATGGACCTAAGATCGGAAGAGCGGTTTCAG      |
| chr19 | 10395974  | 10396013  | ICAM1_11423 | + | GTGACCTATGCACCAGACGTGGACAGGCCCTCTTCTGCGCCTCCCATATTGGTGGCAGAGATCGGAAGAGCGGTTTCAG      |
| chr4  | 123373028 | 123373067 | IL2_11424   | + | GTGACCTATGCACCAGACGTAATGTTAATTTTTTAAAGTACAGAGTAGTTTACCTTAGATCGGAAGAGCGGTTTCAG        |
| chr4  | 123375019 | 123375058 | IL2_11425   | + | GTGACCTATGCACCAGACGTAATATCATGACTAGTTTACATAGAGTCAAGATCGGAAGAGCGGTTTCAG                |
| chr4  | 123377369 | 123377408 | IL2_11426   | + | GTGACCTATGCACCAGACGTAATGTCATTTGTTAATAAGATGATCTCCAGCTAGATTAAGATCGGAAGAGCGGTTTCAG      |

|       |           |           |              |   |                                                                                    |
|-------|-----------|-----------|--------------|---|------------------------------------------------------------------------------------|
| chr4  | 123377606 | 123377645 | IL2_11427    | + | GTGACCTATGCACCAGACGTGTTGAGGTTACTGTGAGTAGTGATTAAGAGAGTGATAGGAGATCGGAAGAGCGGTTTCAG   |
| chr10 | 6054870   | 6054909   | IL2RA_11428  | + | GTGACCTATGCACCAGACGTGAACAAAGTACGGTCATATGTGAACACGGCACCAAAAAGATCGGAAGAGCGGTTTCAG     |
| chr10 | 6060093   | 6060132   | IL2RA_11429  | + | GTGACCTATGCACCAGACGTAGAGAGGGAGTTCCAGCAAAGGGCCCTGGGCTTGGCATGGGAGATCGGAAGAGCGGTTTCAG |
| chr10 | 6061473   | 6061512   | IL2RA_11430  | + | GTGACCTATGCACCAGACGTGAGATAAAGAGAGACTCCTGCTACCGTGACTTTAGGACAGATCGGAAGAGCGGTTTCAG    |
| chr10 | 6061915   | 6061954   | IL2RA_11431  | + | GTGACCTATGCACCAGACGTGAGTAAGTATGCTGGTGGAGCTAAACACAGGAGTCAGGGAGATCGGAAGAGCGGTTTCAG   |
| chr10 | 6063667   | 6063706   | IL2RA_11432  | + | GTGACCTATGCACCAGACGTGAAGGAATGCTCTGAAGGCAAGTTGGGGACAGCACCCGCAAGATCGGAAGAGCGGTTTCAG  |
| chr10 | 6066367   | 6066387   | IL2RA_11433  | + | GTGACCTATGCACCAGACGTGAGATGGAAATGTCAGAGATAAATTCACAAATGCTTCATAGAGATCGGAAGAGCGGTTTCAG |
| chr10 | 6067999   | 6068038   | IL2RA_11434  | + | GTGACCTATGCACCAGACGTAAAGAAGCCTATTAGGAACTCAAGAGGCCCCAGGCAAGTAAGATCGGAAGAGCGGTTTCAG  |
| chr10 | 6104125   | 6104164   | IL2RA_11435  | + | GTGACCTATGCACCAGACGTCTGGGACCAGCCGGGCGAGTAAGCGGAGGTCTTTCTCTAGATCGGAAGAGCGGTTTCAG    |
| chr17 | 45331317  | 45331356  | ITGB3_11436  | + | GTGACCTATGCACCAGACGTCTCCGGCTCGGCAGCGTGCAGCTGCCCCAGGATCTGCGCAGATCGGAAGAGCGGTTTCAG   |
| chr17 | 45351881  | 45351920  | ITGB3_11437  | + | GTGACCTATGCACCAGACGTGATACCAGACCTTGTCTTCTCCAGACTAAGCTGCTTTTAGATCGGAAGAGCGGTTTCAG    |
| chr17 | 45360926  | 45360965  | ITGB3_11438  | + | GTGACCTATGCACCAGACGTGACTCTTTCGGGGAGAGACACTGAAGCAGGTGGGCATAGAAGATCGGAAGAGCGGTTTCAG  |
| chr17 | 45362072  | 45362111  | ITGB3_11439  | + | GTGACCTATGCACCAGACGTCTCCAGACGCCAGGACAGCTCCTTTGCCCCAGGAAGGTAGATCGGAAGAGCGGTTTCAG    |
| chr17 | 45363799  | 45363838  | ITGB3_11440  | + | GTGACCTATGCACCAGACGTAGGACTTGGAGTGCCAGGTGTGGCTGGCATAGATCAAAATAGATCGGAAGAGCGGTTTCAG  |
| chr17 | 45367153  | 45367192  | ITGB3_11441  | + | GTGACCTATGCACCAGACGTCTCGGGCTTCTGGAGTGGGCCCTGTGATGGTGGGTGCCAGATCGGAAGAGCGGTTTCAG    |
| chr17 | 45367651  | 45367690  | ITGB3_11442  | + | GTGACCTATGCACCAGACGTGTGCTGGGAAATGTCGCCGCGGAGAGTCCACCTCATTGGAGATCGGAAGAGCGGTTTCAG   |
| chr17 | 45368465  | 45368504  | ITGB3_11443  | + | GTGACCTATGCACCAGACGTCTGGGCAGGGCCCTTTGCTCTGGAGACTCTGTGGGCACCAAGATCGGAAGAGCGGTTTCAG  |
| chr17 | 45369945  | 45369984  | ITGB3_11444  | + | GTGACCTATGCACCAGACGTCTGGCCAGCCCTCTGCTGGAACCCACACCCTCATATAGATCGGAAGAGCGGTTTCAG      |
| chr17 | 45376907  | 45376946  | ITGB3_11445  | + | GTGACCTATGCACCAGACGTAGTCTGGAGAGAGCCGGGAGGCTGGGAGGTAGGAGAGATAGATCGGAAGAGCGGTTTCAG   |
| chr17 | 45377955  | 45377994  | ITGB3_11446  | + | GTGACCTATGCACCAGACGTCACATCTTAGAGTTGCACACACCCAGGTTCTAAATGTTTCAGATCGGAAGAGCGGTTTCAG  |
| chr17 | 45380217  | 45380256  | ITGB3_11447  | + | GTGACCTATGCACCAGACGTCTGACGGCTCCCGGCCCTGCCCCAGGAGGGAGAGGAGAAGATCGGAAGAGCGGTTTCAG    |
| chr17 | 45385014  | 45385053  | ITGB3_11448  | + | GTGACCTATGCACCAGACGTGGGCTGGGCGTTTTCTAAAGTCTTTGCTGAGACTCTTAAGATCGGAAGAGCGGTTTCAG    |
| chr17 | 45387581  | 45387620  | ITGB3_11449  | + | GTGACCTATGCACCAGACGTTCCCTCAGATCATTATCAGCCTGTGCCAGATTGCAGGATCGGAAGAGCGGTTTCAG       |
| chr19 | 17937730  | 17937769  | JAK3_11450   | + | GTGACCTATGCACCAGACGTGGGGACAGATAAATGGGCTGCTCTGACAGTCCAAGGAAAGATCGGAAGAGCGGTTTCAG    |
| chr19 | 17941038  | 17941077  | JAK3_11451   | + | GTGACCTATGCACCAGACGTGGAGGAGCGCATGTGGTGGGGGAGGAGCCTCCGTGGTGGAGATCGGAAGAGCGGTTTCAG   |
| chr19 | 17941440  | 17941479  | JAK3_11452   | + | GTGACCTATGCACCAGACGTGACAAGGCTTGAGATGCGAGGGGTAGAAAAGGACAGGAAAGATCGGAAGAGCGGTTTCAG   |
| chr19 | 17942220  | 17942259  | JAK3_11453   | + | GTGACCTATGCACCAGACGTGCGGTGTGAGCGTGACAGAGGATCCCAGGATAATCCGGCAGATCGGAAGAGCGGTTTCAG   |
| chr19 | 17942618  | 17942657  | JAK3_11454   | + | GTGACCTATGCACCAGACGTCCAGATCTGTCCACAGGGGCCACCCCTGCTCGTCCCCAGATCGGAAGAGCGGTTTCAG     |
| chr19 | 17943528  | 17943567  | JAK3_11455   | + | GTGACCTATGCACCAGACGTGCGGGATGATGTCACAGCCAGCTGATGCTGCCCTAGATCGGAAGAGCGGTTTCAG        |
| chr19 | 17943749  | 17943788  | JAK3_11456   | + | GTGACCTATGCACCAGACGTGGCATGGGCATGGTAAGCAGCGCCTCTCATCCTGGGCCAGATCGGAAGAGCGGTTTCAG    |
| chr19 | 17945541  | 17945580  | JAK3_11457   | + | GTGACCTATGCACCAGACGTGAGGAGCAGTCGGTAATCCCCAACCAATAGACCCACCCAGATCGGAAGAGCGGTTTCAG    |
| chr19 | 17945823  | 17945862  | JAK3_11458   | + | GTGACCTATGCACCAGACGTGAAAAGTGGGATCAGGGATCCACTTCTTGCCCTGCTCAGCAGATCGGAAGAGCGGTTTCAG  |
| chr19 | 17946035  | 17946074  | JAK3_11459   | + | GTGACCTATGCACCAGACGTGACACACAGGAAAATGCCCGGGAGGTTTGTGAATGAAGAGATCGGAAGAGCGGTTTCAG    |
| chr19 | 17946871  | 17946910  | JAK3_11460   | + | GTGACCTATGCACCAGACGTGCAGGGAGAGCGGGTTGGGAGACTGAAGTGCAC TTGTGAGATCGGAAGAGCGGTTTCAG   |
| chr19 | 17948033  | 17948072  | JAK3_11461   | + | GTGACCTATGCACCAGACGTGGGGAGGAGAGAAGATGCGTGGGTTTTCTTCCACTCCAAGATCGGAAGAGCGGTTTCAG    |
| chr19 | 17948883  | 17948922  | JAK3_11462   | + | GTGACCTATGCACCAGACGTAGGGGACAGCAGAAGAGGCCAGTGAGGGGTTCTCTGCAGGAGATCGGAAGAGCGGTTTCAG  |
| chr19 | 17949210  | 17949249  | JAK3_11463   | + | GTGACCTATGCACCAGACGTAGGATGAGGGAGAAAAACCAGAAATCAGAGGTGAAAAGTGCAGATCGGAAGAGCGGTTTCAG |
| chr19 | 17950483  | 17950522  | JAK3_11464   | + | GTGACCTATGCACCAGACGTGAGTGGCCCTGAGTGGGACTGAGCGACAGACACTCTCCTAGATCGGAAGAGCGGTTTCAG   |
| chr19 | 17951161  | 17951200  | JAK3_11465   | + | GTGACCTATGCACCAGACGTAGGTGAGAGGGAATGGGGAGGAGTCAGAGATAGAAGAAGATCGGAAGAGCGGTTTCAG     |
| chr19 | 17952366  | 17952405  | JAK3_11466   | + | GTGACCTATGCACCAGACGTCAAGCGTCAGACCCAGTGAACCCAGGGGTGCCGGTCCCAGATCGGAAGAGCGGTTTCAG    |
| chr19 | 17952582  | 17952621  | JAK3_11467   | + | GTGACCTATGCACCAGACGTGGGGAGTACCAGAGTGGGGCCCCAGCTGGACCCCGCCAAGATCGGAAGAGCGGTTTCAG    |
| chr19 | 17953430  | 17953469  | JAK3_11468   | + | GTGACCTATGCACCAGACGTTGGAGGGGAGGGAGCCGCTCAGCGTCGGGAGGGGTCCAGATCGGAAGAGCGGTTTCAG     |
| chr19 | 17953992  | 17954031  | JAK3_11469   | + | GTGACCTATGCACCAGACGTGCCACAGGGAGCATAGCTGAGGCCACCCAACCTTCAAGCCAGATCGGAAGAGCGGTTTCAG  |
| chr19 | 17954311  | 17954350  | JAK3_11470   | + | GTGACCTATGCACCAGACGTAGGAGAGAACCCTGGGATGAAAGTGAACCCAGCCTCAGTAGATCGGAAGAGCGGTTTCAG   |
| chr19 | 17954720  | 17954759  | JAK3_11471   | + | GTGACCTATGCACCAGACGTTGGTCCCACAGCTCCCTCCTGAGTCAACCCATCTGTGCCAGATCGGAAGAGCGGTTTCAG   |
| chr19 | 17955237  | 17955276  | JAK3_11472   | + | GTGACCTATGCACCAGACGTTGCCTGGGGACAGAGAGAAAGGCCCTCAGTCTGTCAGATCGGAAGAGCGGTTTCAG       |
| chr5  | 56111893  | 56111932  | MAP3K1_11473 | + | GTGACCTATGCACCAGACGTGGGCCGGGGTCGCGGGGGGACTTGGAGAGCGGGCAGAGGAGATCGGAAGAGCGGTTTCAG   |
| chr5  | 56152588  | 56152627  | MAP3K1_11474 | + | GTGACCTATGCACCAGACGTATGGTTACCAGTTATAAGGAAGAAAGCATAGGAGGAAATAGATCGGAAGAGCGGTTTCAG   |
| chr5  | 56155753  | 56155792  | MAP3K1_11475 | + | GTGACCTATGCACCAGACGTGTTACAACAAATATGTTAGTTTTTATAATTTTTAGCTTCAAGATCGGAAGAGCGGTTTCAG  |
| chr5  | 56160772  | 56160811  | MAP3K1_11476 | + | GTGACCTATGCACCAGACGTTCCACATTTTATACTTTATTAGTAGTAGTATATGGTACTAAGATCGGAAGAGCGGTTTCAG  |
| chr5  | 56161294  | 56161333  | MAP3K1_11477 | + | GTGACCTATGCACCAGACGTATAAATGCTTAGAGTAAAATTTAGCATATTCTTAGGATAGATCGGAAGAGCGGTTTCAG    |
| chr5  | 56161815  | 56161854  | MAP3K1_11478 | + | GTGACCTATGCACCAGACGTTTAAGGCTTTCAAACATTAATCCAGTGTACTTTTTAATTAGATCGGAAGAGCGGTTTCAG   |
| chr5  | 56167869  | 56167908  | MAP3K1_11479 | + | GTGACCTATGCACCAGACGTCCTTTTCTCCCTATGCTTACTCAACACAGTTGCTCTCTGAAGATCGGAAGAGCGGTTTCAG  |
| chr5  | 56168560  | 56168599  | MAP3K1_11480 | + | GTGACCTATGCACCAGACGTTGAAATGATACGGATATGTTAATTTTTAAAAATTTCTCAAGATCGGAAGAGCGGTTTCAG   |
| chr5  | 56168843  | 56168882  | MAP3K1_11481 | + | GTGACCTATGCACCAGACGCTTTTGTTTTCTATTCTCAAAGAAATTTATAGATCAATAGATCGGAAGAGCGGTTTCAG     |
| chr5  | 56171148  | 56171187  | MAP3K1_11482 | + | GTGACCTATGCACCAGACGTTTATTCCATAATCATATTTGGGTTTTGGGGTTTTTGGAGATCGGAAGAGCGGTTTCAG     |
| chr5  | 56174939  | 56174978  | MAP3K1_11483 | + | GTGACCTATGCACCAGACGTTTATGATGAACTTCAAACCTCTTGTCTTAAAAGTGCAGATCGGAAGAGCGGTTTCAG      |
| chr5  | 56176640  | 56176679  | MAP3K1_11484 | + | GTGACCTATGCACCAGACGTTTCACTTAAAGGAATATAGCATATTTTATCATGTTCTGCAGATCGGAAGAGCGGTTTCAG   |

|      |           |           |              |   |                                                                                      |
|------|-----------|-----------|--------------|---|--------------------------------------------------------------------------------------|
| chr5 | 56177110  | 56177149  | MAP3K1_11485 | + | GTGACCTATGCACCAGACGTTTCTGAAATGTATTACTTGTATCTTCTACCTCCCTACAGATCGGAAGAGCGGTTTCAG       |
| chr5 | 56179517  | 56179556  | MAP3K1_11486 | + | GTGACCTATGCACCAGACGTTAGTGTGAGCATATAAATGAAATGACTCAAATCACAAAATGAAAGATCGGAAGAGCGGTTTCAG |
| chr5 | 56180664  | 56180703  | MAP3K1_11487 | + | GTGACCTATGCACCAGACGTTGTTTAAATTAACAAATAGTAGTACGTTGATTTAACATTTTCAGATCGGAAGAGCGGTTTCAG  |
| chr5 | 56183358  | 56183397  | MAP3K1_11488 | + | GTGACCTATGCACCAGACGTTCTTTGAGTGTGATGACAGAAAATATTTTGAATCTGTGAGATCGGAAGAGCGGTTTCAG      |
| chr5 | 56184195  | 56184234  | MAP3K1_11489 | + | GTGACCTATGCACCAGACGTTGATAAAAATTAACCTTCTTTGTGCTAAAAGGAGTACAGCAGAAGATCGGAAGAGCGGTTTCAG |
| chr5 | 56189518  | 56189557  | MAP3K1_11490 | + | GTGACCTATGCACCAGACGTTAGATCAACTACAGTAGAAACAGGATGCTCAACAAGAGAAAAGATCGGAAGAGCGGTTTCAG   |
| chr5 | 56178271  | 56178310  | MAP3K1_11491 | + | GTGACCTATGCACCAGACGTTGACTTGATCTGAACAGTAGTTCCAAATGTGATGACAGCTAGATCGGAAGAGCGGTTTCAG    |
| chr5 | 179663537 | 179663576 | MAPK9_11492  | + | GTGACCTATGCACCAGACGTTAAAACCAAATAATAAAAATCTGAGGCACGACATTGCTGCAGATCGGAAGAGCGGTTTCAG    |
| chr5 | 179663542 | 179663581 | MAPK9_11493  | + | GTGACCTATGCACCAGACGTTCAAATAATAAAAATCTGAGGCACGACATTGCTGCAAATCAGATCGGAAGAGCGGTTTCAG    |
| chr5 | 179665414 | 179665453 | MAPK9_11494  | + | GTGACCTATGCACCAGACGTTAATACAAGTTAAAATGCTTAATCAGTTTTCTAAACAGTTTCAGATCGGAAGAGCGGTTTCAG  |
| chr5 | 179666998 | 179667037 | MAPK9_11495  | + | GTGACCTATGCACCAGACGTTAATCATATGTAAGTCAACAGTAATGCCTCAAAAAAAAAATAGATCGGAAGAGCGGTTTCAG   |
| chr5 | 179668166 | 179668205 | MAPK9_11496  | + | GTGACCTATGCACCAGACGTTAAACAAATATAAATTAATGCTGTTAATATAAACCAACAGAGATCGGAAGAGCGGTTTCAG    |
| chr5 | 179669766 | 179669805 | MAPK9_11497  | + | GTGACCTATGCACCAGACGTTCTTGGAGAAAATCAACTGAAGTACCTGTATTACAGTAGATCGGAAGAGCGGTTTCAG       |
| chr5 | 179674521 | 179674560 | MAPK9_11498  | + | GTGACCTATGCACCAGACGTTAATGAAATGATAAAAATTATGAAGTGCCATGAACAAAACAAAGATCGGAAGAGCGGTTTCAG  |
| chr5 | 179674937 | 179674976 | MAPK9_11499  | + | GTGACCTATGCACCAGACGTTCCAGGGGATAAAAACAGCTAGAGTCCCCATCTTTTTAGATCGGAAGAGCGGTTTCAG       |
| chr5 | 179676149 | 179676188 | MAPK9_11500  | + | GTGACCTATGCACCAGACGTTAATGGCTTAAATTAGTAAAATGAATGAAGCATGCTAAATAAGATCGGAAGAGCGGTTTCAG   |
| chr5 | 179688833 | 179688872 | MAPK9_11501  | + | GTGACCTATGCACCAGACGTTAAAGTGCACTTATTTATTTGAAAATTCAAAAGTTCCCTTAGATCGGAAGAGCGGTTTCAG    |
| chr5 | 179691850 | 179691889 | MAPK9_11502  | + | GTGACCTATGCACCAGACGTTAAAATTAATATACTCAATATGTCAATTTACTTTGATTACAGATCGGAAGAGCGGTTTCAG    |
| chr5 | 179696420 | 179696459 | MAPK9_11503  | + | GTGACCTATGCACCAGACGTTGAAATATAATGCACAATCCATTAGAACGGTTTTGGAAAATAGATCGGAAGAGCGGTTTCAG   |
| chr5 | 179707572 | 179707611 | MAPK9_11504  | + | GTGACCTATGCACCAGACGTTCTGCAATATCCCGAAGGGTGGGCAAGTTTCAGATCCCTTAGATCGGAAGAGCGGTTTCAG    |
| chr2 | 16082987  | 16083026  | MYCN_11505   | + | GTGACCTATGCACCAGACGTTAACTCGGGTCCGGCTGCCTCCTGGGGCACTGGACCCCGAGATCGGAAGAGCGGTTTCAG     |
| chr2 | 16086230  | 16086269  | MYCN_11506   | + | GTGACCTATGCACCAGACGTTAACTGGACAGTCACTGCCACTTTGCACATTTTGATTTTTAGATCGGAAGAGCGGTTTCAG    |
| chr2 | 16082592  | 16082631  | MYCN_11507   | + | GTGACCTATGCACCAGACGTTACCGGCCGCGGCCCAACCCCGCGTTCCACCCCGCCAGTAGATCGGAAGAGCGGTTTCAG     |
| chr2 | 16085927  | 16085966  | MYCN_11508   | + | GTGACCTATGCACCAGACGTTAGAGCTTGAGCCCCGAAACTCTGACTCGGAGGACAGTGAAGATCGGAAGAGCGGTTTCAG    |
| chr9 | 134001147 | 134001186 | NUP214_11509 | + | GTGACCTATGCACCAGACGTTAACCAGGCGCTCCCTCCCTCTTTAGTCTGGCGTTGCCTAGATCGGAAGAGCGGTTTCAG     |
| chr9 | 134003117 | 134003156 | NUP214_11510 | + | GTGACCTATGCACCAGACGTTGGTTTATGTTGCAAAGTAGAGAGAGGATGATGGTGGCATAGATCGGAAGAGCGGTTTCAG    |
| chr9 | 134003881 | 134003920 | NUP214_11511 | + | GTGACCTATGCACCAGACGTTTATACTGTGATGTCAACATGAGAACCTAAGCAGATTTAGATCGGAAGAGCGGTTTCAG      |
| chr9 | 134004875 | 134004914 | NUP214_11512 | + | GTGACCTATGCACCAGACGTTAAGGCTTTACACATGTAGCATACAATCATGGTCTACTAGATCGGAAGAGCGGTTTCAG      |
| chr9 | 134006234 | 134006273 | NUP214_11513 | + | GTGACCTATGCACCAGACGTTCTTGAATCTTGAATTTTCTTAAGTTGCCACTTTTTAGATCGGAAGAGCGGTTTCAG        |
| chr9 | 134008057 | 134008096 | NUP214_11514 | + | GTGACCTATGCACCAGACGTTCTTTCTTTGGGCTGACCTCTAATGACATGTTATAGATCGGAAGAGCGGTTTCAG          |
| chr9 | 134008607 | 134008646 | NUP214_11515 | + | GTGACCTATGCACCAGACGTTGGAAGAAATTTCAATGTTTGAGAATTAGAGAAGTCTTCTAAGATCGGAAGAGCGGTTTCAG   |
| chr9 | 134010402 | 134010441 | NUP214_11516 | + | GTGACCTATGCACCAGACGTTAGTCTGGACAGGGCATTCTGCTCTCACTGGAAGATCACAGATCGGAAGAGCGGTTTCAG     |
| chr9 | 134014805 | 134014844 | NUP214_11517 | + | GTGACCTATGCACCAGACGTTCTGGTAGTTAGTGCAGAANAATAGTCTTCTTTCTAGTTAGGAGATCGGAAGAGCGGTTTCAG  |
| chr9 | 134016108 | 134016147 | NUP214_11518 | + | GTGACCTATGCACCAGACGTTGCCTGCTTTATCAGTAAGGAATACCATGGGCTTGCACAGATCGGAAGAGCGGTTTCAG      |
| chr9 | 134020152 | 134020191 | NUP214_11519 | + | GTGACCTATGCACCAGACGTTCTAAAGTTTGAATCTTCTGAGTTGGGTAGAATAATTTAGATCGGAAGAGCGGTTTCAG      |
| chr9 | 134021702 | 134021741 | NUP214_11520 | + | GTGACCTATGCACCAGACGTTAAGCAGACAACCTTAGACCTCAGCCCTGCCTTCTCAGATTAGATCGGAAGAGCGGTTTCAG   |
| chr9 | 134022982 | 134023021 | NUP214_11521 | + | GTGACCTATGCACCAGACGTTTACGCTTGAATGTTTGTTTATTAAATTTACTGCCCCAGATCGGAAGAGCGGTTTCAG       |
| chr9 | 134025808 | 134025847 | NUP214_11522 | + | GTGACCTATGCACCAGACGTTTCTGAGGGTGTTTTCTGAAAGTAGCTGACAGACTTGGAGATCGGAAGAGCGGTTTCAG      |
| chr9 | 134026163 | 134026202 | NUP214_11523 | + | GTGACCTATGCACCAGACGTTGGATACTTTTCTGAGTTGAATTGCATTTAAACAATTTAGATCGGAAGAGCGGTTTCAG      |
| chr9 | 134027292 | 134027331 | NUP214_11524 | + | GTGACCTATGCACCAGACGTTATGTAATCTGTTAAAAGATTTAAAACAAGCTCATGTAGATCGGAAGAGCGGTTTCAG       |
| chr9 | 134038571 | 134038610 | NUP214_11525 | + | GTGACCTATGCACCAGACGTTGACTTGCACATAAATAATGGTGAATGAATGCATGAACAGATCGGAAGAGCGGTTTCAG      |
| chr9 | 134039353 | 134039392 | NUP214_11526 | + | GTGACCTATGCACCAGACGTTCTTCCAGTCTTTAACTCCCTTTATTCTCTTCCAAGTAAGATCGGAAGAGCGGTTTCAG      |
| chr9 | 134039542 | 134039581 | NUP214_11527 | + | GTGACCTATGCACCAGACGTTCCAGTAACCTGGGCCTGTACATAGTGTAGAGGGTGTGGTGGAGATCGGAAGAGCGGTTTCAG  |
| chr9 | 134049716 | 134049755 | NUP214_11528 | + | GTGACCTATGCACCAGACGTTAGTGGGAAAGGAAACTGTTTTCCCTATGATGTTTCTAACAGATCGGAAGAGCGGTTTCAG    |
| chr9 | 134051019 | 134051058 | NUP214_11529 | + | GTGACCTATGCACCAGACGTTAGCCCATACTGTACAGAGGCTGATTATGAGCTGTCTGAGATCGGAAGAGCGGTTTCAG      |
| chr9 | 134053808 | 134053847 | NUP214_11530 | + | GTGACCTATGCACCAGACGTTACTGCCCAGTGTGTTTCCAGCCCTGGCTGCTTCTGTAGTACGATCGGAAGAGCGGTTTCAG   |
| chr9 | 134064529 | 134064568 | NUP214_11531 | + | GTGACCTATGCACCAGACGTTATTTTGTGTTTCTTGAAGTGAAGAAGCACTCCACAATAGATCGGAAGAGCGGTTTCAG      |
| chr9 | 134067690 | 134067729 | NUP214_11532 | + | GTGACCTATGCACCAGACGTTAAAGTTTTATGGCAAATTAAGTCAATAGCTTCCAGATCGGAAGAGCGGTTTCAG          |
| chr9 | 134070692 | 134070731 | NUP214_11533 | + | GTGACCTATGCACCAGACGTTGTGTTGAGTAGCACTACTCATGTGTTTTCTTAAATAAGAGATCGGAAGAGCGGTTTCAG     |
| chr9 | 134074413 | 134074452 | NUP214_11534 | + | GTGACCTATGCACCAGACGTTGGAAGCTTTTACTTGTTCCTCTGCTATTTGAAAAGATCGGAAGAGCGGTTTCAG          |
| chr9 | 134077115 | 134077154 | NUP214_11535 | + | GTGACCTATGCACCAGACGTTATGCTTTCACTTCACTGATCAACATGTCTCAAACCCATTCAAGATCGGAAGAGCGGTTTCAG  |
| chr9 | 134090766 | 134090805 | NUP214_11536 | + | GTGACCTATGCACCAGACGTTTCCAGTCTTTCCAGTCCCTTGGTCCCTAATGCCATTGTACAGATCGGAAGAGCGGTTTCAG   |
| chr9 | 134098328 | 134098367 | NUP214_11537 | + | GTGACCTATGCACCAGACGTTGCTATTTGTTATGTTATCTTTATATATGATTTGTTTAAAGATCGGAAGAGCGGTTTCAG     |
| chr9 | 134103729 | 134103768 | NUP214_11538 | + | GTGACCTATGCACCAGACGTTGGGAGGGCCCTTGGGAACCCACAGCCAGCCAAAAGCAGATCGGAAGAGCGGTTTCAG       |
| chr9 | 134106167 | 134106206 | NUP214_11539 | + | GTGACCTATGCACCAGACGTTACAGTTCTCCCTCACAAAGCAAAATGGTCCCTTCTGCCAGATCGGAAGAGCGGTTTCAG     |
| chr9 | 134107706 | 134107745 | NUP214_11540 | + | GTGACCTATGCACCAGACGTTCCCTTTTGAAGTCTCACTTAAATAAAGCATAAATAAGAGATCGGAAGAGCGGTTTCAG      |
| chr9 | 134108885 | 134108924 | NUP214_11541 | + | GTGACCTATGCACCAGACGTTGACGGCTTTCTGATCCCTGGGACCAACCCATCTCAGATCGGAAGAGCGGTTTCAG         |
| chr9 | 134073063 | 134073102 | NUP214_11542 | + | GTGACCTATGCACCAGACGTTCCACTAGCAGTACACCACCAGCCACCCAGCACTTCTCAAGATCGGAAGAGCGGTTTCAG     |

|       |           |           |              |   |                                                                                      |
|-------|-----------|-----------|--------------|---|--------------------------------------------------------------------------------------|
| chr9  | 134073513 | 134073552 | NUP214_11543 | + | GTGACCTATGCACCAGACGTCCAGCCTGCAGTCAGCAACTCTGGCACTGCAGCATCTAGTAGATCGGAAGAGCGGTTTCAG    |
| chr9  | 134073963 | 134074002 | NUP214_11544 | + | GTGACCTATGCACCAGACGTGACGACAGCAGCTGCCACACCACAGGTCAGCAGCTCAGGGAGATCGGAAGAGCGGTTTCAG    |
| chr11 | 100910013 | 100910052 | PGR_11545    | + | GTGACCTATGCACCAGACGTAAACAAATGAGTAGAAAAACATGTAATAAAAAATAAAATTCAGATCGGAAGAGCGGTTTCAG   |
| chr11 | 100912844 | 100912883 | PGR_11546    | + | GTGACCTATGCACCAGACGTGACAATTAAGTGGCAGTTGTGTATAAAAAGATGACATTAGATCGGAAGAGCGGTTTCAG      |
| chr11 | 100920801 | 100920840 | PGR_11547    | + | GTGACCTATGCACCAGACGTACACAATACACAAAAGAAAAAGCAACAGGAAAAAAAATAGAGATCGGAAGAGCGGTTTCAG    |
| chr11 | 100922310 | 100922349 | PGR_11548    | + | GTGACCTATGCACCAGACGTAATTTAAAAATACAGTGACCATAAAAATGACTGAATTATCAGATCGGAAGAGCGGTTTCAG    |
| chr11 | 100933494 | 100933533 | PGR_11549    | + | GTGACCTATGCACCAGACGTGAAAAAAAAGAAATTCATGTAATATATAAACTCCATAAGATCGGAAGAGCGGTTTCAG       |
| chr11 | 100962618 | 100962657 | PGR_11550    | + | GTGACCTATGCACCAGACGTAAAAATGAGTCAAAATTTTACAAATATCTAAGATTCACTGAGATCGGAAGAGCGGTTTCAG    |
| chr11 | 100996900 | 100996939 | PGR_11551    | + | GTGACCTATGCACCAGACGTAAAACAAAGTACTCCATTTATTTTTAAGTGCACCACATCAGATCGGAAGAGCGGTTTCAG     |
| chr11 | 100999812 | 100999851 | PGR_11552    | + | GTGACCTATGCACCAGACGTCTCCCTTTTTCTCTCCCCCGTCTCCAGGAGGAGGAAAAAGATCGGAAGAGCGGTTTCAG      |
| chr11 | 100998584 | 100998623 | PGR_11553    | + | GTGACCTATGCACCAGACGTCAACAAGGTAGGAACGCGGGGAGCGCGGGAGGCGCTCCGCGAGATCGGAAGAGCGGTTTCAG   |
| chr11 | 100998993 | 100999032 | PGR_11554    | + | GTGACCTATGCACCAGACGTGGGGGACCGGGGAGCGCTCTGCTGCCGCCCCCGCGGAGATCGGAAGAGCGGTTTCAG        |
| chr11 | 100999402 | 100999441 | PGR_11555    | + | GTGACCTATGCACCAGACGTGAGCGGGGAGGGCTGGGTTGGCTCTGCCCGGACCTGAGGGAGATCGGAAGAGCGGTTTCAG    |
| chr22 | 46594499  | 46594538  | PPARA_11556  | + | GTGACCTATGCACCAGACGTGTTTTCTAGAAAAGTTTTATTTAGAAATGTTTTCTTCTCCAGATCGGAAGAGCGGTTTCAG    |
| chr22 | 46611241  | 46611280  | PPARA_11557  | + | GTGACCTATGCACCAGACGTGCTGGAACAGGGCCTGGTGGCCGCCACCATCACTACTTAAGATCGGAAGAGCGGTTTCAG     |
| chr22 | 46614309  | 46614348  | PPARA_11558  | + | GTGACCTATGCACCAGACGTGGCCCTGCACATTTCCAGTTCGTTCTCAGTTCCTCAGATCGGAAGAGCGGTTTCAG         |
| chr22 | 46615922  | 46615961  | PPARA_11559  | + | GTGACCTATGCACCAGACGTGGCGCTGTTCTGGGTTCTTGGCAACATGGAACCAAGTGTAGATCGGAAGAGCGGTTTCAG     |
| chr22 | 46628147  | 46628186  | PPARA_11560  | + | GTGACCTATGCACCAGACGTGATTAATCTGCTGGTATGCTACTGACAGGCTCCTGATCGGAAGAGCGGTTTCAG           |
| chr22 | 46631288  | 46631327  | PPARA_11561  | + | GTGACCTATGCACCAGACGTATCAGCCACACTTTTTCCAGGAGTTCTGAAGCTGACAGCAAGATCGGAAGAGCGGTTTCAG    |
| chr19 | 54385929  | 54385968  | PRKCG_11562  | + | GTGACCTATGCACCAGACGTGGGGCTGGGGGACTGGGGGACGAGGGGACTAGGGGTGCAGAGATCGGAAGAGCGGTTTCAG    |
| chr19 | 54386459  | 54386498  | PRKCG_11563  | + | GTGACCTATGCACCAGACGTGGGACCGGGCTCCTGGGACCCTCAGGAGGTTGAGGGCTGAGATCGGAAGAGCGGTTTCAG     |
| chr19 | 54387508  | 54387547  | PRKCG_11564  | + | GTGACCTATGCACCAGACGTGGACACCTGGTTCTCTCCTCGGGCGCTGCCCCCGCCCTCAGATCGGAAGAGCGGTTTCAG     |
| chr19 | 54393014  | 54393053  | PRKCG_11565  | + | GTGACCTATGCACCAGACGTGGCGCTGCCAGGGCCCTCCAAAGCGCCGGTCTGGGTAGATCGGAAGAGCGGTTTCAG        |
| chr19 | 54393282  | 54393321  | PRKCG_11566  | + | GTGACCTATGCACCAGACGTGCCCTCGCCTGGCCCGCCCTCCCAAGTGTGAGGAGATCGGAAGAGCGGTTTCAG           |
| chr19 | 54395095  | 54395134  | PRKCG_11567  | + | GTGACCTATGCACCAGACGTGGTGCAGGGAAGGCAATGACAGCTGACAGAGAATGATCTGAGATCGGAAGAGCGGTTTCAG    |
| chr19 | 54395908  | 54395947  | PRKCG_11568  | + | GTGACCTATGCACCAGACGTGGGCTGGGGCTGGGGATGGAGCGCAATATTACCATCTCCAGATCGGAAGAGCGGTTTCAG     |
| chr19 | 54396340  | 54396379  | PRKCG_11569  | + | GTGACCTATGCACCAGACGTCTGGCTTCTCAAGGGAGCCAGCCAGCCTCCACGGTAGATCGGAAGAGCGGTTTCAG         |
| chr19 | 54396656  | 54396695  | PRKCG_11570  | + | GTGACCTATGCACCAGACGTCCAGGGCGTTGAATGGAGGGGATTTTTGCCTACTTCTCTGAGATCGGAAGAGCGGTTTCAG    |
| chr19 | 54401376  | 54401415  | PRKCG_11571  | + | GTGACCTATGCACCAGACGTGGGGTTCTGGGGTAAAGGAGGAGTGTGTGGGAAGTCCAGATCGGAAGAGCGGTTTCAG       |
| chr19 | 54401893  | 54401932  | PRKCG_11572  | + | GTGACCTATGCACCAGACGTAGGGGCGGAGGGCTGTCTCCGGCGCTGCCCTTATCCAGTAGATCGGAAGAGCGGTTTCAG     |
| chr19 | 54403589  | 54403628  | PRKCG_11573  | + | GTGACCTATGCACCAGACGTGCCAACAGAGAATGGTCGGGGTGGTGGGAAGGGGCGAGATAGATCGGAAGAGCGGTTTCAG    |
| chr19 | 54403746  | 54403785  | PRKCG_11574  | + | GTGACCTATGCACCAGACGTCCAGGAATTTCCGTGGAGGAAATCACGCCCTGGAAGGGAAGATCGGAAGAGCGGTTTCAG     |
| chr19 | 54404014  | 54404053  | PRKCG_11575  | + | GTGACCTATGCACCAGACGTCCCTGCTGCTGTTGACAGCTTGTAGATCCCTTAGAGGGTAGATCGGAAGAGCGGTTTCAG     |
| chr19 | 54406418  | 54406457  | PRKCG_11576  | + | GTGACCTATGCACCAGACGTGGGGAGAAGCTGGTCTGGCTAAAAGAGACAGAGAGGGGAGATCGGAAGAGCGGTTTCAG      |
| chr19 | 54408007  | 54408046  | PRKCG_11577  | + | GTGACCTATGCACCAGACGTCTGACTGCCAGCTTCTCCAGCTCAACAACACACACCCACATCGGAAGAGCGGTTTCAG       |
| chr19 | 54409722  | 54409761  | PRKCG_11578  | + | GTGACCTATGCACCAGACGTCTCCAGGCAACAAAACCTGGTCCCTGAAGGGTGGGGTTAGATCGGAAGAGCGGTTTCAG      |
| chr19 | 54410160  | 54410199  | PRKCG_11579  | + | GTGACCTATGCACCAGACGTGCCACTAGGTGTCCCAACGTCCCTCCGCGTGCAGGAGATCGGAAGAGCGGTTTCAG         |
| chr1  | 198666049 | 198666088 | PTPRC_11580  | + | GTGACCTATGCACCAGACGTAAAAAGTTGTTAACTTAAATATCAGGGAATGTCAATTTAGAAAAGATCGGAAGAGCGGTTTCAG |
| chr1  | 198668844 | 198668883 | PTPRC_11581  | + | GTGACCTATGCACCAGACGTCTTTAGACTTGTGCAATATGAAAAGTACATGACGACTAAGATCGGAAGAGCGGTTTCAG      |
| chr1  | 198671670 | 198671709 | PTPRC_11582  | + | GTGACCTATGCACCAGACGTGCTGCTTAGTAGTGTCTTACATATAGATAATGAAATGGAGATCGGAAGAGCGGTTTCAG      |
| chr1  | 198672512 | 198672551 | PTPRC_11583  | + | GTGACCTATGCACCAGACGTCTCAGTCAGGCAGCCACCATCCCCATGTGCCTGGTGAAGATCGGAAGAGCGGTTTCAG       |
| chr1  | 198673638 | 198673677 | PTPRC_11584  | + | GTGACCTATGCACCAGACGTTTACTTAGAATCAGCATACTCTACTTTGGAATAGCACTTTAGATCGGAAGAGCGGTTTCAG    |
| chr1  | 198677401 | 198677440 | PTPRC_11585  | + | GTGACCTATGCACCAGACGTAAACATTGACCAGAGAATTTTTTTTTGTGGCACAATGTTGTAGATCGGAAGAGCGGTTTCAG   |
| chr1  | 198678964 | 198679003 | PTPRC_11586  | + | GTGACCTATGCACCAGACGTACTTGCATTTATATGTAATAATTGCTTCTCTTCTCATGTTAGATCGGAAGAGCGGTTTCAG    |
| chr1  | 198682212 | 198682251 | PTPRC_11587  | + | GTGACCTATGCACCAGACGTGTAAGATTTAAATTTTCAAGAAAAGAGAAATCAAGAATTTGAGATCGGAAGAGCGGTTTCAG   |
| chr1  | 198685980 | 198686019 | PTPRC_11588  | + | GTGACCTATGCACCAGACGTGTTTTAATGCTTCTTCCATAAGTGTAAAAGCAAGGTAGATCGGAAGAGCGGTTTCAG        |
| chr1  | 198687442 | 198687481 | PTPRC_11589  | + | GTGACCTATGCACCAGACGTGCTCTCTACATTAAGTACAACTACATTATAATGATAGATCGGAAGAGCGGTTTCAG         |
| chr1  | 198698311 | 198698350 | PTPRC_11590  | + | GTGACCTATGCACCAGACGTATATTTTTGCTGATGACTATTCTTCCCTGCATTTGAATAGATCGGAAGAGCGGTTTCAG      |
| chr1  | 198700866 | 198700905 | PTPRC_11591  | + | GTGACCTATGCACCAGACGTCTTTTGTATATGATGATAAATTCAGACATCAAGACAGTTTCAAGATCGGAAGAGCGGTTTCAG  |
| chr1  | 198701530 | 198701569 | PTPRC_11592  | + | GTGACCTATGCACCAGACGTATTGAGTGCTGAATTCATATATTAGGCTACTTGATTATAGATCGGAAGAGCGGTTTCAG      |
| chr1  | 198701696 | 198701735 | PTPRC_11593  | + | GTGACCTATGCACCAGACGTATTTGATTCTTCTTACACTACATTTTATTTCAGTCCAGATCGGAAGAGCGGTTTCAG        |
| chr1  | 198703372 | 198703411 | PTPRC_11594  | + | GTGACCTATGCACCAGACGTGATAATTGATAATTTCTTTTGAATAAATTTATAGCACTAGATCGGAAGAGCGGTTTCAG      |
| chr1  | 198703565 | 198703604 | PTPRC_11595  | + | GTGACCTATGCACCAGACGTAGAAGATTCATAGTGTGGTCTTGGGGTTAGGAAAACAAGAGATCGGAAGAGCGGTTTCAG     |
| chr1  | 198711166 | 198711205 | PTPRC_11596  | + | GTGACCTATGCACCAGACGTGCAACAAAAAACAACAACAACAAAAAAGTCCAACAGAGATCGGAAGAGCGGTTTCAG        |
| chr1  | 198711507 | 198711546 | PTPRC_11597  | + | GTGACCTATGCACCAGACGTACTTTAGTATTCTCATTGTTTTGGACTTAAAGATCGGAAGAGCGGTTTCAG              |
| chr1  | 198717339 | 198717378 | PTPRC_11598  | + | GTGACCTATGCACCAGACGTATTTTTTTATTTTTTGATCAGATAAAGTTAAGCTTTTAGATCGGAAGAGCGGTTTCAG       |
| chr1  | 198718689 | 198718728 | PTPRC_11599  | + | GTGACCTATGCACCAGACGTAAATTCGCAAAATCCCAAGCTTAAACATTTAAATAATAAGATCGGAAGAGCGGTTTCAG      |
| chr1  | 198719766 | 198719805 | PTPRC_11600  | + | GTGACCTATGCACCAGACGTGTAAGATTTTCTTTAAGCTTCTGCTCAAAAACGTCAAGATCGGAAGAGCGGTTTCAG        |



|      |           |           |             |   |                                                                                      |
|------|-----------|-----------|-------------|---|--------------------------------------------------------------------------------------|
| chr1 | 198721511 | 198721550 | PTPRC_11601 | + | GTGACCTATGCACCAGACGTAATTTGGGGAGTATATTTCTTTGATATAATGGATCTGGTAAGATCGGAAGAGCGGTTTCAG    |
| chr1 | 198721912 | 198721951 | PTPRC_11602 | + | GTGACCTATGCACCAGACGTTTTGGTGAATGTGCTCTCAAATCATATGCTTGACTTCAGATCGGAAGAGCGGTTTCAG       |
| chr1 | 198723544 | 198723583 | PTPRC_11603 | + | GTGACCTATGCACCAGACGTTTACCATTGCTTTTAAACATGCTCGGAATTTTTTTTTTCTAGATCGGAAGAGCGGTTTCAG    |
| chr1 | 198725321 | 198725360 | PTPRC_11604 | + | GTGACCTATGCACCAGACGTAATGAGGAACTCAAACCTCCTGTTAGCTGTTATTTCTAGATCGGAAGAGCGGTTTCAG       |
| chr1 | 44010848  | 44010887  | PTPRF_11605 | + | GTGACCTATGCACCAGACGTCCTCCCAAGGTACAGATCTCCACAGGTTGAAAGGTGGCATAGATCGGAAGAGCGGTTTCAG    |
| chr1 | 44019319  | 44019358  | PTPRF_11606 | + | GTGACCTATGCACCAGACGTGGTGGGAAGGGGTGCGCAGGGCTCAGGGTCTGCCACACTAGATCGGAAGAGCGGTTTCAG     |
| chr1 | 44019623  | 44019662  | PTPRF_11607 | + | GTGACCTATGCACCAGACGTGGGAGACGTGGGACGTTGGCTGGGCTGCCGGGCTGAGCGTGGGAGATCGGAAGAGCGGTTTCAG |
| chr1 | 44035460  | 44035499  | PTPRF_11608 | + | GTGACCTATGCACCAGACGTGGCAGGGGTCAAGGGGCCATGCAGACCTCAGAACAAGCGTAGATCGGAAGAGCGGTTTCAG    |
| chr1 | 44044602  | 44044641  | PTPRF_11609 | + | GTGACCTATGCACCAGACGTAGGCAGTGCCTGGCCCTGTCACCACAGAGCTGTGCTGCAAGATCGGAAGAGCGGTTTCAG     |
| chr1 | 44054682  | 44054721  | PTPRF_11610 | + | GTGACCTATGCACCAGACGTGAGGTGCTGTAAACAGTGCCCTCCCTGTCATCTGGGAGGTAGATCGGAAGAGCGGTTTCAG    |
| chr1 | 44057235  | 44057274  | PTPRF_11611 | + | GTGACCTATGCACCAGACGTGCATGCCGGCTGGGCAGCCAACAGCAGAGAAGGGGAGGCTAGATCGGAAGAGCGGTTTCAG    |
| chr1 | 44057630  | 44057669  | PTPRF_11612 | + | GTGACCTATGCACCAGACGTGGCAGAGAAGCATGAGGGGCTCCTGGTCCCTGAGGGTAGATCGGAAGAGCGGTTTCAG       |
| chr1 | 44063735  | 44063774  | PTPRF_11613 | + | GTGACCTATGCACCAGACGTCCACCCTGGGGCAGGGGAGGGGCGCTTCTGCCTCAGACACCAAGCATCGGAAGAGCGGTTTCAG |
| chr1 | 44064595  | 44064634  | PTPRF_11614 | + | GTGACCTATGCACCAGACGTGGGTGGTGGGGTGGCAGGGTGAAGCAGACAGCAGCATGAGATCGGAAGAGCGGTTTCAG      |
| chr1 | 44067779  | 44067818  | PTPRF_11615 | + | GTGACCTATGCACCAGACGTGGTGTGCGAACCGGGACAAAGACATGGGTCAAGCTGGGCTCAGATCGGAAGAGCGGTTTCAG   |
| chr1 | 44069215  | 44069254  | PTPRF_11616 | + | GTGACCTATGCACCAGACGTGGTCAAGACGACCTGAGGGTGGGGCAGCAGGAGGGCAGCAGATCGGAAGAGCGGTTTCAG     |
| chr1 | 44069871  | 44069910  | PTPRF_11617 | + | GTGACCTATGCACCAGACGTGGACATGGCATCCCTCCCGAGTGTGGCTGCATCTGGGGAGATCGGAAGAGCGGTTTCAG      |
| chr1 | 44070682  | 44070721  | PTPRF_11618 | + | GTGACCTATGCACCAGACGTGCCACCGCAGCTGAGCTGGCAGACACAGCCCTGCTGAGATCGGAAGAGCGGTTTCAG        |
| chr1 | 44071125  | 44071164  | PTPRF_11619 | + | GTGACCTATGCACCAGACGTGAGGTATCGGGGAGGGCGGGCAGGGCTGGAGGTAACCAGATCGGAAGAGCGGTTTCAG       |
| chr1 | 44071304  | 44071343  | PTPRF_11620 | + | GTGACCTATGCACCAGACGTAGGGGATGGGGACACTGACAGCCCCATTGCAGTGGTCAGCAGATCGGAAGAGCGGTTTCAG    |
| chr1 | 44072140  | 44072179  | PTPRF_11621 | + | GTGACCTATGCACCAGACGTGCCGGCTGGCTGTGACAGCCCTGATTCCCTGGGCCTGGCAGATCGGAAGAGCGGTTTCAG     |
| chr1 | 44072650  | 44072689  | PTPRF_11622 | + | GTGACCTATGCACCAGACGTCCCTCAGAGCTCCGGGAACCGGCCACTGCCCTCGCCTTTAGATCGGAAGAGCGGTTTCAG     |
| chr1 | 44075180  | 44075219  | PTPRF_11623 | + | GTGACCTATGCACCAGACGTCTATGGCTGTGTCGCCAGCCAGCCAGCTAGCAGGCCTAGATCGGAAGAGCGGTTTCAG       |
| chr1 | 44079397  | 44079436  | PTPRF_11624 | + | GTGACCTATGCACCAGACGTCCCGCCCCCTACCTATGCTGCCAGCCCTACCCAAACAGCCTCGGAAGAGCGGTTTCAG       |
| chr1 | 44083250  | 44083289  | PTPRF_11625 | + | GTGACCTATGCACCAGACGTGGGGTGGCCCTCCCATCCCTTGTCTCCCCCTTGTAGCAGATCGGAAGAGCGGTTTCAG       |
| chr1 | 44083593  | 44083632  | PTPRF_11626 | + | GTGACCTATGCACCAGACGTAGGGCCCTGCCAGGAGGGGGTGGGAAATGCCAGCCACAAGATCGGAAGAGCGGTTTCAG      |
| chr1 | 44084431  | 44084470  | PTPRF_11627 | + | GTGACCTATGCACCAGACGTCCCCAGTGCATATCTTACCAGACACTGTAAGGACAGAGATCGGAAGAGCGGTTTCAG        |
| chr1 | 44084884  | 44084923  | PTPRF_11628 | + | GTGACCTATGCACCAGACGTACAGTGCCACCCAGGGGTGGGTGGGGTGGGAGGTGGGGAGATCGGAAGAGCGGTTTCAG      |
| chr1 | 44085255  | 44085294  | PTPRF_11629 | + | GTGACCTATGCACCAGACGTGTGGGCTGCTTGGCTCCAGGGCTAGACTGGTTCATGCAGATCGGAAGAGCGGTTTCAG       |
| chr1 | 44085540  | 44085579  | PTPRF_11630 | + | GTGACCTATGCACCAGACGTATGTCACTGCCACCATTGCCCTACAGGGCCCTAGGCCTGAGATCGGAAGAGCGGTTTCAG     |
| chr1 | 44085903  | 44085942  | PTPRF_11631 | + | GTGACCTATGCACCAGACGTCTTTCCCCAGGGCCCTGTACACCTGGGAGAACACCAAGATCGGAAGAGCGGTTTCAG        |
| chr1 | 44086261  | 44086300  | PTPRF_11632 | + | GTGACCTATGCACCAGACGTGCATTGAGTGTGTCCATAACGCTGCCCTGTCCACAGCTGGAGATCGGAAGAGCGGTTTCAG    |
| chr1 | 44086674  | 44086713  | PTPRF_11633 | + | GTGACCTATGCACCAGACGTCCCCCTGGAGGGCTGGGTGGGTGGGCCTGAAGGCCTGGCAGATCGGAAGAGCGGTTTCAG     |
| chr1 | 44086914  | 44086953  | PTPRF_11634 | + | GTGACCTATGCACCAGACGTCCAGGCTGACGGGCCAGGGCCCTGGCAGCAGCGCTGGAGATCGGAAGAGCGGTTTCAG       |
| chr1 | 44087685  | 44087724  | PTPRF_11635 | + | GTGACCTATGCACCAGACGTCTCTCCCTCCGCCACCCTGGCCCTGGGGCTCCGAGGGGAAGATCGGAAGAGCGGTTTCAG     |
| chr1 | 44056944  | 44056983  | PTPRF_11636 | + | GTGACCTATGCACCAGACGTGCGCCGCTGCAGGCACGCATGTGAGCGCCAGCACCATGAGATCGGAAGAGCGGTTTCAG      |
| chr1 | 44069581  | 44069620  | PTPRF_11637 | + | GTGACCTATGCACCAGACGTCAAACCTGCATGTGACAGGACTGACCACGTCTACCACAGAGATCGGAAGAGCGGTTTCAG     |
| chr3 | 12626167  | 12626206  | RAF1_11638  | + | GTGACCTATGCACCAGACGTGCCAAGAATGCTCTCATTAGCTGTGTCTCAAAGACACAGAGATCGGAAGAGCGGTTTCAG     |
| chr3 | 12626491  | 12626530  | RAF1_11639  | + | GTGACCTATGCACCAGACGTGAAAACAGCTGAGCTAATGGGGGGTGAATGAACAACAGATAGATCGGAAGAGCGGTTTCAG    |
| chr3 | 12626763  | 12626802  | RAF1_11640  | + | GTGACCTATGCACCAGACGTCCCATATGACAAAAGTGCATTTATCACCATATGACAGGCAGATCGGAAGAGCGGTTTCAG     |
| chr3 | 12627309  | 12627348  | RAF1_11641  | + | GTGACCTATGCACCAGACGTGTTAAGGACTCTGGTTTCAAGAAAGTCCAGTTAATTTAGATCGGAAGAGCGGTTTCAG       |
| chr3 | 12629147  | 12629186  | RAF1_11642  | + | GTGACCTATGCACCAGACGTAAAAGAAATTTAAAAATAAGTTTGGGGGCATGAGTAGAGATCGGAAGAGCGGTTTCAG       |
| chr3 | 12633302  | 12633341  | RAF1_11643  | + | GTGACCTATGCACCAGACGTAGTTGGCAGTCAAGTGAATGATCTCAGTCTTAGATCGGAAGAGCGGTTTCAG             |
| chr3 | 12641318  | 12641357  | RAF1_11644  | + | GTGACCTATGCACCAGACGTTAGAGATCATTATATACTCCATGCAATGGTAATAATCTTAGATCGGAAGAGCGGTTTCAG     |
| chr3 | 12641789  | 12641828  | RAF1_11645  | + | GTGACCTATGCACCAGACGTAAAGACAAAGCAAGCCACACAAAGGATAAGCCAAACAGAAAGATCGGAAGAGCGGTTTCAG    |
| chr3 | 12641925  | 12641964  | RAF1_11646  | + | GTGACCTATGCACCAGACGTAAAAGCTGGTCAACTCTACACAAAAGATTCTAGATCGGAAGAGCGGTTTCAG             |
| chr3 | 12645799  | 12645838  | RAF1_11647  | + | GTGACCTATGCACCAGACGTAAAAGAAAATTCATGATTGGCACTTAGGCTTTCATACTGGAGATCGGAAGAGCGGTTTCAG    |
| chr3 | 12647809  | 12647848  | RAF1_11648  | + | GTGACCTATGCACCAGACGTGCAGGGAAAGACTGGTTTTAGGCTTGCAGTAATCTTACAAGATCGGAAGAGCGGTTTCAG     |
| chr3 | 12650433  | 12650472  | RAF1_11649  | + | GTGACCTATGCACCAGACGTAAACACAGGTGTAATATGCTGAATAAATAAAGATGACAAGATCGGAAGAGCGGTTTCAG      |
| chr3 | 12650845  | 12650884  | RAF1_11650  | + | GTGACCTATGCACCAGACGTTTTAAAAAAAACATGAAATGTTTAAACAAGATCAAAGTTAGATCGGAAGAGCGGTTTCAG     |
| chr3 | 12653572  | 12653611  | RAF1_11651  | + | GTGACCTATGCACCAGACGTAGGACCACCTTTAGGACCAACACAGGCTGCAGCACCCCTTAGATCGGAAGAGCGGTTTCAG    |
| chr3 | 12660231  | 12660270  | RAF1_11652  | + | GTGACCTATGCACCAGACGTAAACAATCTTAAACCTGTAAGAAACACAAATAATTGTAGATCGGAAGAGCGGTTTCAG       |
| chr7 | 128829334 | 128829373 | SMO_11653   | + | GTGACCTATGCACCAGACGTCCGAGCCGGTCTGGGGGGCGGGAGGTGCCGCGGTAAGATAGATCGGAAGAGCGGTTTCAG     |
| chr7 | 128843441 | 128843480 | SMO_11654   | + | GTGACCTATGCACCAGACGTTGTGAGACAAGGTCCAGGCTCTCTGGTTGGGCAGGACCGAGATCGGAAGAGCGGTTTCAG     |
| chr7 | 128845264 | 128845303 | SMO_11655   | + | GTGACCTATGCACCAGACGTGGAGGGCAGGCCCGGGGGCCCTCAGCTGGAACGTGGGAAGATCGGAAGAGCGGTTTCAG      |
| chr7 | 128845634 | 128845673 | SMO_11656   | + | GTGACCTATGCACCAGACGTTGGGAGCCAGAGGTGAAGGTACAGGGAGGAAGCTGAAGAGATCGGAAGAGCGGTTTCAG      |
| chr7 | 128846221 | 128846260 | SMO_11657   | + | GTGACCTATGCACCAGACGTGGTAGGAACGGGAGCCTGGATGGGGTGAATTTGAGGGAAGATCGGAAGAGCGGTTTCAG      |
| chr7 | 128846439 | 128846478 | SMO_11658   | + | GTGACCTATGCACCAGACGTACCAGGCCAGGACCTGGGGCAACAAAATACTGGGCAAGATCGGAAGAGCGGTTTCAG        |

|       |           |           |             |   |                                                                                     |
|-------|-----------|-----------|-------------|---|-------------------------------------------------------------------------------------|
| chr7  | 128848703 | 128848742 | SMO_11659   | + | GTGACCTATGCACCAGACGTCGGGGGACTTCGGTCTGAGGTCTGGCCAGCCCAACTAGATCGGAAGAGCGGTTTCAG       |
| chr7  | 128849249 | 128849288 | SMO_11660   | + | GTGACCTATGCACCAGACGTTGGCATGGAGGCGGCAGTGCTGGGAGCTGGAGCCAAAGCCAAAGATCGGAAGAGCGGTTTCAG |
| chr7  | 128850400 | 128850439 | SMO_11661   | + | GTGACCTATGCACCAGACGTCAGCCAGCCCCCTCTGCCCTGCCCGCCTCACCCCTCAGCCTAGATCGGAAGAGCGGTTTCAG  |
| chr7  | 128850965 | 128851004 | SMO_11662   | + | GTGACCTATGCACCAGACGTCCTCTCTACCCGAGCCGCTGGCCCCGCGCTGCCCATAGATCGGAAGAGCGGTTTCAG       |
| chr7  | 128851622 | 128851661 | SMO_11663   | + | GTGACCTATGCACCAGACGTTCAAGCTTCTGGAGGAAGTGGGGGGAGCACAGAGGCTGGAGATCGGAAGAGCGGTTTCAG    |
| chr7  | 128852303 | 128852342 | SMO_11664   | + | GTGACCTATGCACCAGACGTCAGGACCTGGGACAGGAAAGAGAGAACCAATACCTTCAAAGATCGGAAGAGCGGTTTCAG    |
| chr10 | 104264102 | 104264141 | SUFU_11665  | + | GTGACCTATGCACCAGACGTTGGCCGGGAGACGCGGAGCGGCGGCTGGAAAGGTTAAGATCGGAAGAGCGGTTTCAG       |
| chr10 | 104269071 | 104269110 | SUFU_11666  | + | GTGACCTATGCACCAGACGTTGCCACCTGTTCTTTTATCCAGAGCCTTATTCTGAGGTCTTAGATCGGAAGAGCGGTTTCAG  |
| chr10 | 104309874 | 104309913 | SUFU_11667  | + | GTGACCTATGCACCAGACGTAGGGCTGGCTGCTGTGCTGGTCTTTTCCATGAGCCTGGAGATCGGAAGAGCGGTTTCAG     |
| chr10 | 104352492 | 104352531 | SUFU_11668  | + | GTGACCTATGCACCAGACGTTGGTGGACGCTGGCTCAAGCCTTCTGTGGGAAAGGCTCTAGATCGGAAGAGCGGTTTCAG    |
| chr10 | 104353489 | 104353528 | SUFU_11669  | + | GTGACCTATGCACCAGACGTATGCAAGGTGGGAGCGCGGCTCCCTGGGCTGGGGTGGGAGATCGGAAGAGCGGTTTCAG     |
| chr10 | 104353833 | 104353872 | SUFU_11670  | + | GTGACCTATGCACCAGACGTAGTGAGGAAAACCTTTCTAGCACCCCTGTCCCTAGGCTCTAGATCGGAAGAGCGGTTTCAG   |
| chr10 | 104357061 | 104357100 | SUFU_11671  | + | GTGACCTATGCACCAGACGTTCACTCAGACTTCCACCCAGCCTTCTCTCTTCTTCCACAGATCGGAAGAGCGGTTTCAG     |
| chr10 | 104359312 | 104359351 | SUFU_11672  | + | GTGACCTATGCACCAGACGTCAGTGTCCCTGGGCTGGAACAAGAGGACGACTTTTTTCTGAGATCGGAAGAGCGGTTTCAG   |
| chr10 | 104375170 | 104375209 | SUFU_11673  | + | GTGACCTATGCACCAGACGTCAGCCCTGCCACACAGTTTACCCACAGCACCCAGCTCAGAGATCGGAAGAGCGGTTTCAG    |
| chr10 | 104377196 | 104377235 | SUFU_11674  | + | GTGACCTATGCACCAGACGTCCTTTTTCTTCTCCCTCTTCTTCTTTCATAGACTTCTTGCAGATCGGAAGAGCGGTTTCAG   |
| chr10 | 104389923 | 104389962 | SUFU_11675  | + | GTGACCTATGCACCAGACGTTGCCCTGCAGTGGCCAGCGGGAGCCAGCTGCTCCCCAGTAGATCGGAAGAGCGGTTTCAG    |
| chr1  | 47685857  | 47685896  | TAL1_11676  | + | GTGACCTATGCACCAGACGTTGGAGGACAAGAGTTAGAGAAATGGGCTTGAGATCTTCCAGATCGGAAGAGCGGTTTCAG    |
| chr1  | 47689781  | 47689820  | TAL1_11677  | + | GTGACCTATGCACCAGACGTTGAACGGGCAGATCACAAAGATCCCATTGTTGAGGGAGGGAAAGATCGGAAGAGCGGTTTCAG |
| chr1  | 47691571  | 47691610  | TAL1_11678  | + | GTGACCTATGCACCAGACGTTGACAGACAGACAAGCGGATGCCCGCTCTGACGACCCGCCAGATCGGAAGAGCGGTTTCAG   |
| chr14 | 76425699  | 76425738  | TGFB3_11679 | + | GTGACCTATGCACCAGACGTACATGTCAAGTGAAGGTTGGAAGGCCAAGTCTCAGGCTGAGATCGGAAGAGCGGTTTCAG    |
| chr14 | 76427430  | 76427469  | TGFB3_11680 | + | GTGACCTATGCACCAGACGTTAAACATTTATAGAAAATCAACTTAAACCACCAATAAAGAGATCGGAAGAGCGGTTTCAG    |
| chr14 | 76429841  | 76429880  | TGFB3_11681 | + | GTGACCTATGCACCAGACGTTGAAGGAAATGACAATCTCTGTCTGAAGAGACAGCCAGATCGGAAGAGCGGTTTCAG       |
| chr14 | 76432049  | 76432088  | TGFB3_11682 | + | GTGACCTATGCACCAGACGTGACAGAAATGATGAGAAAGCACTCTGTGTGATGGGAAAGATCGGAAGAGCGGTTTCAG      |
| chr14 | 76437609  | 76437648  | TGFB3_11683 | + | GTGACCTATGCACCAGACGTGAGAAAGGAGTGAAGTACCCGAGACCAGGACAGAGTGGCCAGATCGGAAGAGCGGTTTCAG   |
| chr14 | 76438072  | 76438111  | TGFB3_11684 | + | GTGACCTATGCACCAGACGTAAGCAGAGCAGAGGGCACAGCATGAGCGAGACATGCAGGAAGATCGGAAGAGCGGTTTCAG   |
| chr14 | 76447247  | 76447286  | TGFB3_11685 | + | GTGACCTATGCACCAGACGTTGGAAGAGAGGCCAGGGGGACGGCAAGGCCTGGAGAGGAAGAGATCGGAAGAGCGGTTTCAG  |
| chr17 | 76171042  | 76171081  | TK1_11686   | + | GTGACCTATGCACCAGACGTTGGACAGGAGTGGGTGAAGGGCCAGGACAGGAAGGAGGCAAGATCGGAAGAGCGGTTTCAG   |
| chr17 | 76171261  | 76171300  | TK1_11687   | + | GTGACCTATGCACCAGACGTATGAAAGACAGAGGGCGCTCAGCCACTTACCAGGTGGGAGATCGGAAGAGCGGTTTCAG     |
| chr17 | 76171710  | 76171749  | TK1_11688   | + | GTGACCTATGCACCAGACGTCACGTTGGAGAAAGAGTGTGAGAGCTTCCACCCAGCACAAAGATCGGAAGAGCGGTTTCAG   |
| chr17 | 76178774  | 76178813  | TK1_11689   | + | GTGACCTATGCACCAGACGTTAAAGCCAGAGCGTGAAGCAGGGCCAGGGAGGCCAGAAGCCAAGATCGGAAGAGCGGTTTCAG |
| chr17 | 76181257  | 76181296  | TK1_11690   | + | GTGACCTATGCACCAGACGTAGAGAGGGTCAAGTGAAGTCCACGGCGGAGGAGTGGGAGAGATCGGAAGAGCGGTTTCAG    |
| chr17 | 76182910  | 76182949  | TK1_11691   | + | GTGACCTATGCACCAGACGTAGGTGAGGTCAATTTGAGGGCCCGCCTGCGCGGATCCCTGAGATCGGAAGAGCGGTTTCAG   |
| chr17 | 76183086  | 76183125  | TK1_11692   | + | GTGACCTATGCACCAGACGTTGGAAGTTCCACGAACCCGAGTACTCTCCAGGGCCGTCGCCAGATCGGAAGAGCGGTTTCAG  |
| chr12 | 48238799  | 48238838  | VDR_11693   | + | GTGACCTATGCACCAGACGTTGGGATAGAGAAGAAGAGACTCAGCTCAGCTGGGCCAGATCGGAAGAGCGGTTTCAG       |
| chr12 | 48240245  | 48240284  | VDR_11694   | + | GTGACCTATGCACCAGACGTTCAATGGCCAGTACTGCGGGCAGAGCTGAGGAGCCGCCAAGATCGGAAGAGCGGTTTCAG    |
| chr12 | 48240602  | 48240641  | VDR_11695   | + | GTGACCTATGCACCAGACGTTGGGAGGGAAGGAGTCAAGTTACCAGTAAACGCCTTCAAGAGATCGGAAGAGCGGTTTCAG   |
| chr12 | 48249595  | 48249634  | VDR_11696   | + | GTGACCTATGCACCAGACGTTGAGGGAAGAGAAGGAGCTATTTAAGGATACTTGGACCAGAGATCGGAAGAGCGGTTTCAG   |
| chr12 | 48251043  | 48251082  | VDR_11697   | + | GTGACCTATGCACCAGACGTTAAGATGGGTTCTCAGACCCACATTTTGGGGTTGCCTTCTAGATCGGAAGAGCGGTTTCAG   |
| chr12 | 48251482  | 48251521  | VDR_11698   | + | GTGACCTATGCACCAGACGTTGGAAGGGAGCTCAGGAGGGCTGCCAGCAGCTCCACAGGATCGGAAGAGCGGTTTCAG      |
| chr12 | 48258971  | 48259010  | VDR_11699   | + | GTGACCTATGCACCAGACGTAGCACACACTGCCCTGCCCTGACTGAACCTCCGGCTCTAGATCGGAAGAGCGGTTTCAG     |
| chr12 | 48272907  | 48272946  | VDR_11700   | + | GTGACCTATGCACCAGACGTACAGCAAGCAGGCCACGGTCAAGCCAGAGTCAAGTCCAGAGATCGGAAGAGCGGTTTCAG    |
| chr4  | 89013544  | 89013583  | ABCG2_11701 | + | GTGACCTATGCACCAGACGTACAGAAAAAGAATATAAATTCATTCTAGCATCCGTCAAAGATCGGAAGAGCGGTTTCAG     |
| chr4  | 89015822  | 89015861  | ABCG2_11702 | + | GTGACCTATGCACCAGACGTAGTGGGAGCAGGGCAAGGTAACAGTTTTAAATTTCAAGAAGATCGGAAGAGCGGTTTCAG    |
| chr4  | 89016772  | 89016811  | ABCG2_11703 | + | GTGACCTATGCACCAGACGTTCAAATACTAAAAGTCAAGGCTGCTTGGTAAATTTATGCAAGATCGGAAGAGCGGTTTCAG   |
| chr4  | 89018770  | 89018809  | ABCG2_11704 | + | GTGACCTATGCACCAGACGTTAAGAGAAGAGTAGTTAACCCAACTGCCTAGGTCACCGTAAGATCGGAAGAGCGGTTTCAG   |
| chr4  | 89020611  | 89020650  | ABCG2_11705 | + | GTGACCTATGCACCAGACGTTAAATACGTATCATACTCCAAGATTAGTTTAAAGAACCAAGATCGGAAGAGCGGTTTCAG    |
| chr4  | 89022482  | 89022521  | ABCG2_11706 | + | GTGACCTATGCACCAGACGTTAAGGGAAACCAATCACCAGCAGTCAACTCAGCATTCTTAGAGATCGGAAGAGCGGTTTCAG  |
| chr4  | 89028429  | 89028468  | ABCG2_11707 | + | GTGACCTATGCACCAGACGTAGAAAAATGCAAAAAAGGGGAAGAGTTTCAATTAGAGATAGATCGGAAGAGCGGTTTCAG    |
| chr4  | 89034716  | 89034755  | ABCG2_11708 | + | GTGACCTATGCACCAGACGTAGTGATAAAAAAGGAAACACAACAAGATAACAACAATTAGATCGGAAGAGCGGTTTCAG     |
| chr4  | 89036221  | 89036260  | ABCG2_11709 | + | GTGACCTATGCACCAGACGTAGGCAGCTCAAAAACAACAACTTATGATCTTGGAAACAAGATCGGAAGAGCGGTTTCAG     |
| chr4  | 89039423  | 89039462  | ABCG2_11710 | + | GTGACCTATGCACCAGACGTAGGAGACTCAAGTCACTTAAATCTGAAACTTGAAGATCGGAAGAGCGGTTTCAG          |
| chr4  | 89052376  | 89052415  | ABCG2_11711 | + | GTGACCTATGCACCAGACGTATAGCATTATTAATGAGACATAATGATAATGAGTCTTTCTAGATCGGAAGAGCGGTTTCAG   |
| chr4  | 89053080  | 89053119  | ABCG2_11712 | + | GTGACCTATGCACCAGACGTACATATATGTTGTGGGTCTAATAACCTATAAGAGAATAAGATCGGAAGAGCGGTTTCAG     |
| chr4  | 89053798  | 89053837  | ABCG2_11713 | + | GTGACCTATGCACCAGACGTTAAAACAGACTGATTTACTATTCATTTAAGTCAAGTTCAGATCGGAAGAGCGGTTTCAG     |
| chr4  | 89061158  | 89061197  | ABCG2_11714 | + | GTGACCTATGCACCAGACGTTTATCTTCTGACAGCAAAAAGCAATAGTAAGTTGATAAGATCGGAAGAGCGGTTTCAG      |
| chr5  | 131290075 | 131290114 | ACSL6_11715 | + | GTGACCTATGCACCAGACGTTAAGTACGAAAAATCTTAAACAGATAAGAACACAGATTAGATCGGAAGAGCGGTTTCAG     |
| chr5  | 131295311 | 131295350 | ACSL6_11716 | + | GTGACCTATGCACCAGACGTTCCATATGAGAAAAATTAACAAGACAAGAACACATTTCAAAGAGATCGGAAGAGCGGTTTCAG |

|       |           |           |             |   |                                                                                     |
|-------|-----------|-----------|-------------|---|-------------------------------------------------------------------------------------|
| chr5  | 131296325 | 131296364 | ACSL6_11717 | + | GTGACCTATGCACCAGACGTACCAAAGGAGAACACAGTATGACAAATGCATTTAAAGTAGATCGGAAGAGCGGTTTCAG     |
| chr5  | 131298382 | 131298421 | ACSL6_11718 | + | GTGACCTATGCACCAGACGTGGACAAACAGCTTTATAAGAACATGGCACTCTCAAGCCTGAGATCGGAAGAGCGGTTTCAG   |
| chr5  | 131302236 | 131302275 | ACSL6_11719 | + | GTGACCTATGCACCAGACGTAAAACCATGGCTTCTCTCAGCCACATCATGAGGAATCAGGAGATCGGAAGAGCGGTTTCAG   |
| chr5  | 131305904 | 131305943 | ACSL6_11720 | + | GTGACCTATGCACCAGACGTAAACACAGAAGCCACACTATGGGCACACACCTCCAAGAGCAGATCGGAAGAGCGGTTTCAG   |
| chr5  | 131307349 | 131307388 | ACSL6_11721 | + | GTGACCTATGCACCAGACGTAAAGAAGAGCTGCCAAATTTTGTGATGCTGAGATGGTGTAGATCGGAAGAGCGGTTTCAG    |
| chr5  | 131308562 | 131308601 | ACSL6_11722 | + | GTGACCTATGCACCAGACGTAAAGTTGGAAGCAGCTGTCAGAGCCTGAATGTCTCATTTTCAGATCGGAAGAGCGGTTTCAG  |
| chr5  | 131309104 | 131309143 | ACSL6_11723 | + | GTGACCTATGCACCAGACGTAGGACAGGAAGGGAGGAGTCCCTTAGGGTGGTCACTACTGAGATCGGAAGAGCGGTTTCAG   |
| chr5  | 131310539 | 131310578 | ACSL6_11724 | + | GTGACCTATGCACCAGACGTAAAGAAGGAGCCAGGCAAGGCCCGGTGAGTCAAGTGGGTAGATCGGAAGAGCGGTTTCAG    |
| chr5  | 131310674 | 131310713 | ACSL6_11725 | + | GTGACCTATGCACCAGACGTGGGCATGGGAGACAGAAAGGAAAGAAACACTGACAGGAAAGATCGGAAGAGCGGTTTCAG    |
| chr5  | 131312425 | 131312464 | ACSL6_11726 | + | GTGACCTATGCACCAGACGTAAAGCAAGAAGTCAAATTAGTTGGAAACTCAAGGGCCACTAGATCGGAAGAGCGGTTTCAG   |
| chr5  | 131321162 | 131321201 | ACSL6_11727 | + | GTGACCTATGCACCAGACGTGAGAAGAGGAGTGTGTTAGGGAGACCCAGTGTGGCCAGCCAGATCGGAAGAGCGGTTTCAG   |
| chr5  | 131323930 | 131323969 | ACSL6_11728 | + | GTGACCTATGCACCAGACGTCCATCAAGGAGAGTCAGGCCATGTGGGCCAGGTGATGAGAGATCGGAAGAGCGGTTTCAG    |
| chr5  | 131324608 | 131324647 | ACSL6_11729 | + | GTGACCTATGCACCAGACGTACATGAGGCGGGGGTGGGGAAGAAGGGGAGATTAGAGGGCAGATCGGAAGAGCGGTTTCAG   |
| chr5  | 131325212 | 131325251 | ACSL6_11730 | + | GTGACCTATGCACCAGACGTATGTGGGGAAGTGTGGGAAAACAAGGACTCTTCAACAGGAGATCGGAAGAGCGGTTTCAG    |
| chr5  | 131325868 | 131325907 | ACSL6_11731 | + | GTGACCTATGCACCAGACGTATAAGAAAGCCTTGTGTGTCAGAGAGGGGTGAGAGTGGGTGTAGATCGGAAGAGCGGTTTCAG |
| chr5  | 131326671 | 131326710 | ACSL6_11732 | + | GTGACCTATGCACCAGACGTAGCACCCGCCAGAGAAAGTTGGCTGAGGCAGGTAGGGGTGCAGATCGGAAGAGCGGTTTCAG  |
| chr5  | 131329955 | 131329994 | ACSL6_11733 | + | GTGACCTATGCACCAGACGTCAAGAGTCAGATAAGGCAAGAGACCTGACGGGCAGGTTAGAGATCGGAAGAGCGGTTTCAG   |
| chr20 | 43248499  | 43248538  | ADA_11734   | + | GTGACCTATGCACCAGACGTGTTTCAGAGAAGCAAAAAGATCAGGCAACTTGTAGTACCCAAGATCGGAAGAGCGGTTTCAG  |
| chr20 | 43251304  | 43251343  | ADA_11735   | + | GTGACCTATGCACCAGACGTAGGTGTGTGGCTGGCAGGGATGGCCCCAGGCCATGCTGATAGATCGGAAGAGCGGTTTCAG   |
| chr20 | 43251582  | 43251621  | ADA_11736   | + | GTGACCTATGCACCAGACGTGCAGAAATAGAGCCAAGTATGGGAGGAGGCAGTGAGGAGGGAGATCGGAAGAGCGGTTTCAG  |
| chr20 | 43251730  | 43251769  | ADA_11737   | + | GTGACCTATGCACCAGACGTGAGAGCCAGGTGATGGGTGCCCTAGCGGGAGGGCCCCGCCAGATCGGAAGAGCGGTTTCAG   |
| chr20 | 43252981  | 43253020  | ADA_11738   | + | GTGACCTATGCACCAGACGTGATGCCACCCAGGCTCTGTACCAGCACCATGGAGAGACAGATCGGAAGAGCGGTTTCAG     |
| chr20 | 43254336  | 43254375  | ADA_11739   | + | GTGACCTATGCACCAGACGTAGAGGAGTAGGGATGGGCCTGAGGCAAAAAGGAGCCATAAGATCGGAAGAGCGGTTTCAG    |
| chr20 | 43255251  | 43255290  | ADA_11740   | + | GTGACCTATGCACCAGACGTAAAGAAAGGGTTGGGAACAACCTTCCCAAGTCCCTTGGGAGATCGGAAGAGCGGTTTCAG    |
| chr20 | 43257821  | 43257860  | ADA_11741   | + | GTGACCTATGCACCAGACGTAAACAGTGAAGTGGTGGACCAACCCGGGCAGGATCCAGGCAAGATCGGAAGAGCGGTTTCAG  |
| chr20 | 43280259  | 43280298  | ADA_11742   | + | GTGACCTATGCACCAGACGTTGCGCCCCGGCGCTGCTCCCTCCGCCGCCGCTCGGTGGGTAGATCGGAAGAGCGGTTTCAG   |
