# Supplementary material
Source: PubMed Central journal article supplement (PMC4336783)
Supplement: NIHMS664701-supplement-Supplementary.pdf [file NIHMS664701-supplement-Supplementary.pdf]

## Supplementary Information for:

### **A streamlined and high-throughput targeting approach for human germline and cancer genomes using Oligonucleotide-Selective Sequencing**

Samuel Myllykangas<sup>1†</sup>, Jason D. Buenrostro<sup>2†</sup>, Georges Natsoulis<sup>1</sup>, John M. Bell<sup>2</sup>, Hanlee P. Ji<sup>1,2</sup>

† These authors contributed equally to this work.

<sup>1</sup>Division of Oncology, Department of Medicine, Stanford University School of Medicine, Stanford, CA, United States, 94305

<sup>2</sup>Stanford Genome Technology Center, Stanford University, Palo Alto, CA, United States, 94304

Supplementary Methods. Related programs are available in Supplementary Data Files.

Supplementary Tables 1 – 4. Supplementary Tables 5 and 6 are available as separate files.

Supplementary Figures 1 – 8.

## Supplementary Methods

**Overview of the molecular biology of OS-Seq.** We have provided a detailed description of the underlying molecular biology of OS-Seq including hybridization, ligation and extension among other molecular parameters. The sequences of the specific oligonucleotides are also provided in the following pages. The basic reagents include target-specific oligonucleotides, a single adapter for creating sequencing libraries and standard cluster amplification reagents. There are three general steps for OS-Seq. For **Step 1**, target-specific oligonucleotides are used to modify flow cell primers to primer-probes. In the Illumina flow cell two types of primers (named C and D) are immobilized on a paired-end flow cell. In OS-Seq a subset of D primers are modified to primer-probes using complex library of oligonucleotides. Oligonucleotides have sequences that hybridize to type D flow cell primers. Hybridized oligonucleotides are then used as a template for DNA polymerase and D primers are extended. After denaturation, target-specific primer-probes are randomly immobilized on the flow cell.

For **Step 2**, genomic targets in a single-adaptor library are captured using primer-probes. These adapters incorporate sites for sequencing primers and immobilized flow cell primers. In OS-Seq, we use a modified adapter to prepare single-adapter libraries from genomic DNA. Targets in single-adaptor library are captured during high heat hybridization to their complementary primer-probes. Captured single-adapter library fragments are used as a template for DNA polymerase and primer-probes are extended. Denaturation releases template DNA from immobilized targets.

For **Step 3**, immobilized targets are rendered to be compatible with Illumina sequencing. In Illumina sequencing, solid-phase amplification of the immobilized sequencing library fragments using C and D primers is required. In OS-Seq, during low heat hybridization the single-adapter tails of the immobilized targets hybridize to type C primers on the flow cell surface, which stabilizes a bridge structure. The 3' ends of immobilized targets and C primers are extended using DNA polymerase. After denaturation, two complementary, immobilized sequencing library fragments are formed that contain complete C and D priming sites and are compatible with solid-phase amplification. After all of the steps of OS-Seq, immobilized targets are structurally identical to a standard paired-end Illumina library and are amplified and processed using Illumina's standard kits and protocols.

**Primer and adapter sequences.** Listed are the primers used in the OS-Seq approach. Modified nucleotides are noted.

X = phosphorothioate bond

P = 5'-phosphate

| <b>Oligonucleotide Name</b>     | <b>Sequence</b>                                                | <b>Note</b>                                              |
|---------------------------------|----------------------------------------------------------------|----------------------------------------------------------|
| Ad_top_FC_capture_A_tail        | CGAGATCTACACTCTTTCCCTACACGACGCTCTTCCGATCxT                     | This oligo is used for PCR amplification of the library. |
| Ad_bot_FC_capture_A_tail        | p-GATCGGAAGAGCGTCGTGTAGGGAAAGAGTGTAGATCTCG                     |                                                          |
| Ad_top_FC_capture_TGCTAA_1      | CGAGATCTACACTCTTTCCCTACACGACGCTCTTCCGATCTTGCTAAxT              |                                                          |
| Ad_top_FC_capture_AGGTCA_2      | CGAGATCTACACTCTTTCCCTACACGACGCTCTTCCGATCTAGGTCAxT              |                                                          |
| Ad_top_FC_capture_AACCTG_3      | CGAGATCTACACTCTTTCCCTACACGACGCTCTTCCGATCTAACCTGxT              |                                                          |
| Ad_bot_FC_capture_TGCTAA_1      | p-TTAGCAAGATCGGAAGAGCGTCGTGTAGGGAAAGAGTGTAGATCTCG              |                                                          |
| Ad_bot_FC_capture_AGGTCA_2      | p-TGACCTAGATCGGAAGAGCGTCGTGTAGGGAAAGAGTGTAGATCTCG              |                                                          |
| Ad_bot_FC_capture_AACCTG_3      | p-CAGGTTAGATCGGAAGAGCGTCGTGTAGGGAAAGAGTGTAGATCTCG              |                                                          |
| Microarray_oligo_amp_primer_1_U | GCTGACCTTAAACCTAACGCGAGGGCGGCAGTTGGGATTTTCGTGACCTATGCACCAGACGU |                                                          |
| Microarray_oligo_amp_primer_2   | CAAGCAGAAGACGGCATAACGAGATCGGTCTCGGCATTCCTGCTGAACCGCTCTTCCGATCT |                                                          |

**Overview of the molecular biology and related DNA sequence events of OS-Seq.** We list the oligonucleotide sequences and underlying molecular events that are part of OS-Seq and subsequent sequencing of targets.

## 0) Oligonucleotides

OS-Seq oligonucleotide:

5' - NNNNNNNNNNNNNNNNNNNNNNNNNNNNNNNNNNNNNNNNNNNNNAGATCGGAAGAGCGGTTCAGCAGGAATGCCGAGACCGATCTCGTATGCCGTCTTCTGCTTG - 3' (Generic capture oligonucleotide, N = unique 40-mer sequence)

Ad\_top\_FC\_capture\_A\_tail:

5' - CGAGATCTACACTCTTCCCTACACGACGCTCTTCCGATCT - 3'

Ad\_bot\_FC\_capture\_A\_tail:

5' - GATCGGAAGAGCGTCGTGTAGGGAAAGAGTGTAGATCTCG - 3'

Flow cell primer 'C':

5' - PS-TTTTTTTTTTAATGATACGGCGACCACCGAGAUCTACAC - 3' (U = 2-deoxyuridine)

Flow cell primer 'D':

5' - PS-TTTTTTTTTTCAAGCAGAAGACGGCATAACGAGoxoAT - 3', (Goxo = 8-oxoguanine)

Sequencing primer 1:

5' - AACTCTTTCCCTACACGACGCTCTTCCGATCT - 3'

Sequencing primer 2:

5' - CGGTCTCGGCATTCCTGCTGAACCGCTCTTCCGATCT - 3'

---

## 1) Flow cell modification

Anneal

3' - GTTCGTCTTCTGCCGTATGCTCTAGCCAGAGCCGTAAGGACGACTTGGCGAGAAGGCTAGANNNNNNNNNNNNNNNNNNNNNNNNNNNNNNNNNNNNNNNNNNNNN - 5' (OS-Seq oligonucleotide)  
FC - CAAGCAGAAGACGGCATAACGAGAT - 3' (Flow cell primer 'D')

Extension

3' - GTTCGTCTTCTGCCGTATGCTCTAGCCAGAGCCGTAAGGACGACTTGGCGAGAAGGCTAGANNNNNNNNNNNNNNNNNNNNNNNNNNNNNNNNNNNNNNNNNNNNN - 5' (OS-Seq oligonucleotide)  
FC - CAAGCAGAAGACGGCATAACGAGATCGGTCTCGGCATTCCTGCTGAACCGCTCTTCCGATCTNNNNNNNNNNNNNNNNNNNNNNNNNNNNNNNNNNNNNNNNNNNN - 3' (primer-probe)

Denature

FC - CAAGCAGAAGACGGCATAACGAGATCGGTCTCGGCATTCCTGCTGAACCGCTCTTCCGATCTNNNNNNNNNNNNNNNNNNNNNNNNNNNNNNNNNNNNNNNNNNNN - 3' (primer-probe)

---

## 2) Library prep

Fragmentation, end repair

5' - NNNNNNNNNNNNNNNNNNNNNNNNNNNNNNNNNNNNNNNNNNNNN - 3' (genomic DNA)  
3' - NNNNNNNNNNNNNNNNNNNNNNNNNNNNNNNNNNNNNNNNNNNNN - 5' (genomic DNA)

A-tailing

5' - NNNNNNNNNNNNNNNNNNNNNNNNNNNNNNNNNNNNNNNNNNNNA - 3' (genomic DNA after A-tailing)  
3' - ANNNNNNNNNNNNNNNNNNNNNNNNNNNNNNNNNNNNNNNNNNNN - 5' (genomic DNA after A-tailing)





**Cluster station programs for OS-Seq.** OS-Seq is run in two parts with two scripts: OSSEQ\_program\_p1.xml and OSSEQ\_program\_p2.xml. The programs are available in **Supplementary Data Files** and at our website (<http://dna-discovery.stanford.edu>).

The prompts in these scripts inform the user which reagents to load in each step. These prompts were written for use of PhiX in lane 4, if not using PhiX then we recommend one disregards the prompts specific to lane 4. To begin the OS-Seq process, we load the program ending with “p1” using “Illumina ClusterStation Software”. To proceed, we follow the prompts as indicated in the scripts. The second hybridization step is for 20 hours. We generally that the “p1” script be run between 12-5 pm, otherwise the hybridization will be completed early morning the next day. If using PhiX, we denature the template with the standard Illumina method and concentrations during the 2nd “Extension-Amplification” of “p1”. Once “p1” is complete, we load script beginning in “p2”, run, and follow the prompts. Once “p2” is complete, we proceed with the standard Illumina protocol for sequencing.

**Indexing assignment.** The following perl scripts were used for indexing assignment of sequence data produced from OS-Seq: 6b\_tag\_dist.pl and 6b\_binner.pl. The programs are available in **Supplementary Data Files** and at the following website (<http://dna-discovery.stanford.edu>). The qseq.txt scripts produced by the Illumina off-line base caller (OLB 1.9) are concatenated into one file for each lane. The script 6b\_tag\_dist.pl is run on this concatenated file. Its two outputs contain the names "6b\_index" and "6b\_tag\_dist". The output containing "6b\_tag\_dist" shows the tag counts, which serves as a useful quality control step. The file "6b\_index.txt" is one of two input files for the script "6b\_binner.pl". The script "6b\_binner.pl" is run with the "6b\_index" file and the Illumina export file as inputs. This produces a separate export file for each of the 16 tags.

An example is listed below.

Assume the qseq files have been created and GERALD.pl run to create the aligned files, including export files:

```
cat > 20120101_I1.all_seq.txt s_1_1_????_qseq.txt
6b_tag_dist.pl 201201_I1.all_seq.txt
```

The above produces: 20120101\_I1.6b\_tag\_dist.txt and 20120101\_I1.6b\_index.txt.

6b\_binner.pl 20120101\_I1.6b\_index.txt s\_1\_1\_export.txt

This produces seventeen export files (including a garbage file with \_OTH in the name) with identifiers such as s\_1\_1\_export\_AGGTCA.txt.

**Estimating the primer-probe to target ratio.** We used information about hybridization efficiency of PhiX, a standard sequencing control for Illumina systems, as a basis for our estimation. In Illumina GAllx sequencing, PhiX was used in 10 pM concentration. Volume of the Illumina GAllx flow cell is 10  $\mu$ l. Thus, there were 60,221,400 PhiX sequencing library fragments in the hybridization mix inside a single flow cell lane. Immobilization of the PhiX library resulted in 7,124,567 reads (clusters derived from single library molecules) that were unique matches. Therefore, the efficiency of immobilization was 11.8%.

We then used PhiX library immobilization efficiency to estimate the number of immobilized primer-probes. We used 100 nM targeting oligonucleotides to prepare OS-Seq-366. Overall, there were  $6 \times 10^{11}$  oligonucleotide molecules in 10  $\mu$ l flow cell lane during hybridization. We used similar conditions as in PhiX lane to prepare the primer-probes. If similar efficiency is achieved using synthetic oligonucleotides as in PhiX experiments, we estimated that  $7.1 \times 10^{10}$  primer-probes were immobilized on the flow cell.

We prepared a single-adaptor sequencing library (30 ng/ $\mu$ l) using human genomic DNA. 10  $\mu$ l of that library was used in hybridization to flow cell. In all, there were DNA equivalent of 90,000 human diploid genomes in the flow cell lane during capture. For OS-Seq-366 there are 366 targets in a human diploid genome, suggesting that there were 32,940,000 potential target molecules in the hybridization mix. For every target molecule in the hybridization there were 2,163 primer-probe molecules. We captured 1,629,751 molecules that resulted in uniquely matched reads (**Table 1**). Therefore, the efficiency of capture using OS-Seq-366 and GAllx was 4.9%.



**Supplementary Table 1. OS-Seq coverage metrics.** We report the coverage classes for OS-Seq-366 which involves ten genes and OS-Seq-11K which covers 344 genes. Two samples were sequenced including a normal germline genome (NA18507) and a matched normal-tumor colorectal cancer sample.

| <b>Assay</b>                                                                        | <b>OS-Seq-366</b> | <b>OS-Seq-11K</b>  | <b>OS-Seq-11K</b>   | <b>OS-Seq-11K</b>     |
|-------------------------------------------------------------------------------------|-------------------|--------------------|---------------------|-----------------------|
| Sample                                                                              | NA18507           | NA18507            | Normal<br>(matched) | Tumor<br>(colorectal) |
| Number of primer-probes                                                             | 366               | 11,742             | 11,742              | 11,742                |
| Exon bases                                                                          | 30,246            | 947,689            | 947,689             | 947,689               |
| Exon bases covered at $\geq 1$<br>(Proportion of exon bases covered at $\geq 1$ )   | 26,300<br>(87.0%) | 917,360<br>(96.8%) | 900,574<br>(95.0%)  | 908,609<br>(95.9%)    |
| Exon bases covered at $\geq 10$<br>(Proportion of exon bases covered at $\geq 10$ ) | 25,574<br>(84.6%) | 641,866<br>(67.7%) | 625,815<br>(66.0%)  | 619,159<br>(65.3%)    |
| Exon bases covered at $\geq 20$<br>(Proportion of exon bases covered at $\geq 20$ ) | 25,349<br>(83.8%) | 433,297<br>(45.7%) | 436,686<br>(46.1%)  | 413,500<br>(43.6%)    |

**Supplementary Table 2. SNV concordance from OS-Seq and NA18507.** To assess the variant calling performance of OS-Seq-366 and OS-Seq-11k assays, we conducted a targeted sequencing analysis on NA18507, a Yoruban individual who has undergone whole genome sequencing analysis. For SNV calling with either OS-Seq assay, we analyzed on-target positions with genotype quality scores greater than 50 and a minimum of 10X coverage. We extracted the published NA18507 SNVs and other reported SNPs that occurred in these same high quality regions. In comparison, 97% of the OS-Seq-366 and 95.7% of the OS-Seq-11k had previously been reported (**Table 1**). For OS-Seq-366 and OS-Seq-11k the sensitivity of variant detection was 0.97 and 0.95 respectively based on the reported SNPs.

| <b>Sample</b>                                            | <b>18507</b>                       | <b>18507</b>                       |
|----------------------------------------------------------|------------------------------------|------------------------------------|
| <b>Reported SNP data</b>                                 | Bentley et al. (2008) and dnSNP131 | Bentley et al. (2008) and dnSNP131 |
| <b>OS-Seq assay</b>                                      | OS-Seq-366                         | OS-Seq-11K                         |
| <b>Total OS-Seq SNVs</b>                                 | 105                                | 985                                |
| <b>OS-Seq SNVs concordant with reported SNP position</b> | 105                                | 943                                |
| <b>OS-Seq SNVs not reported elsewhere</b>                | -                                  | 42                                 |
| <b>Reported NA18507 SNPs not called by OS-Seq</b>        | 3                                  | 54                                 |
| <b>OS-Seq SNV Sensitivity</b>                            | 0.968                              | 0.947                              |

**Supplementary Table 3. SNV concordance from OS-Seq and SNP genotyping arrays on a normal tumor pair.** We applied OS-Seq-11k analysis to genomic DNA derived from a matched normal – colorectal carcinoma tumor pair. For comparison, we genotyped the two samples with the Affymetrix SNP 6.0 array. In comparing the OS-Seq SNVs to Affymetrix SNPs, we observed a high concordance of 99.8% for the normal and 99.5% for the tumor.

| <b>Sample</b>                   | <b>2722A</b>       | <b>2736A</b>       |
|---------------------------------|--------------------|--------------------|
| <b>Source of array SNP data</b> | Affymetrix SNP 6.0 | Affymetrix SNP 6.0 |

| <b>OS-Seq assay</b>                           | <b>OS-Seq-11K</b> | <b>OS-Seq-11K</b> |
|-----------------------------------------------|-------------------|-------------------|
| <b>Total OS-Seq SNVs</b>                      | 871               | 727               |
| <b>OS-Seq SNVs concordant with array SNPs</b> | 546               | 418               |
| <b>Array SNPs not called by OS-Seq</b>        | 1                 | 2                 |

**Supplementary Table 4. OS-Seq-366 primer probe sequences.** This is provided as a separate table. This table lists the oligonucleotides used for OS-Seq-366.

**Supplementary Table 5. OS-Seq-11k primer probe sequences.** This is provided as a separate table. This table lists the oligonucleotides used for OS-Seq-11k.

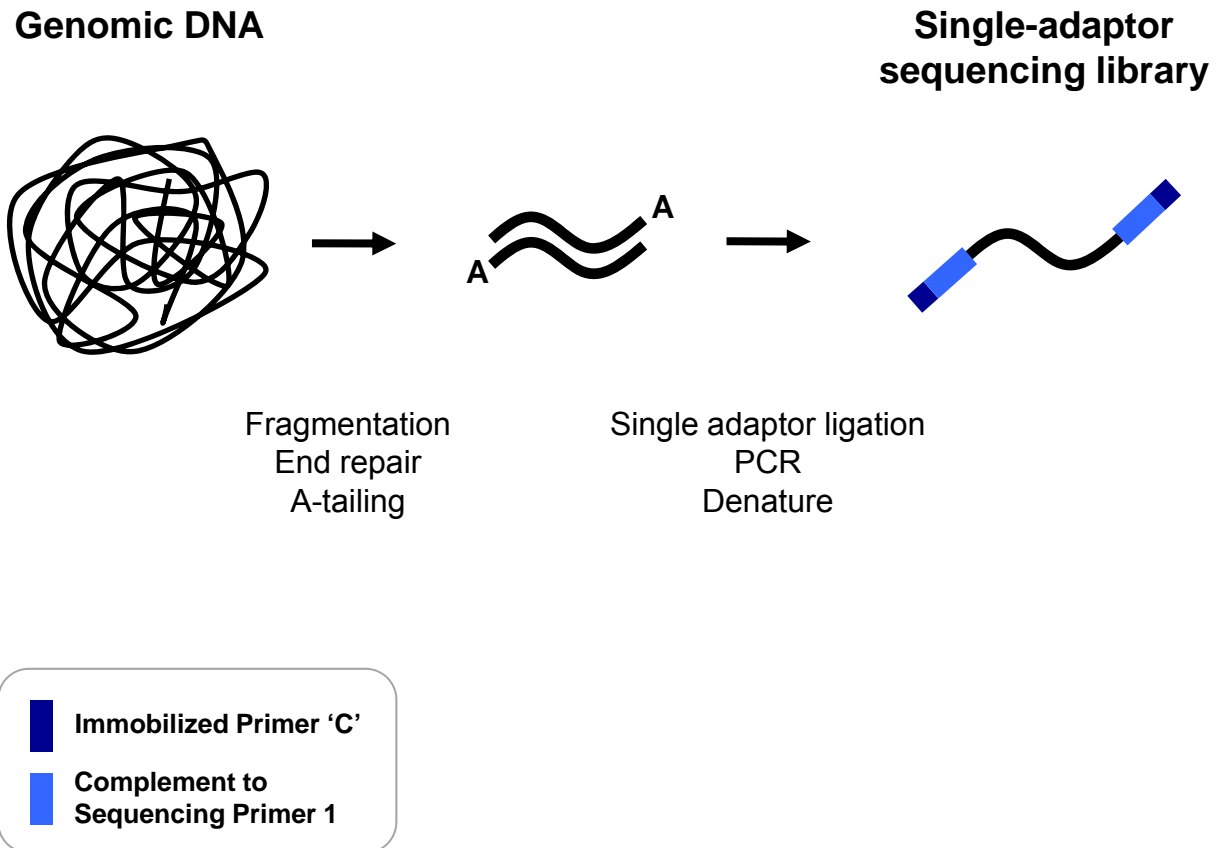

**Supplementary Figure 1.** Sequencing library preparation for OS-Seq. A general scheme of genomic DNA fragmentation, end repair, A-tailing, adaptor ligation and PCR used in the preparation of OS-Seq libraries.

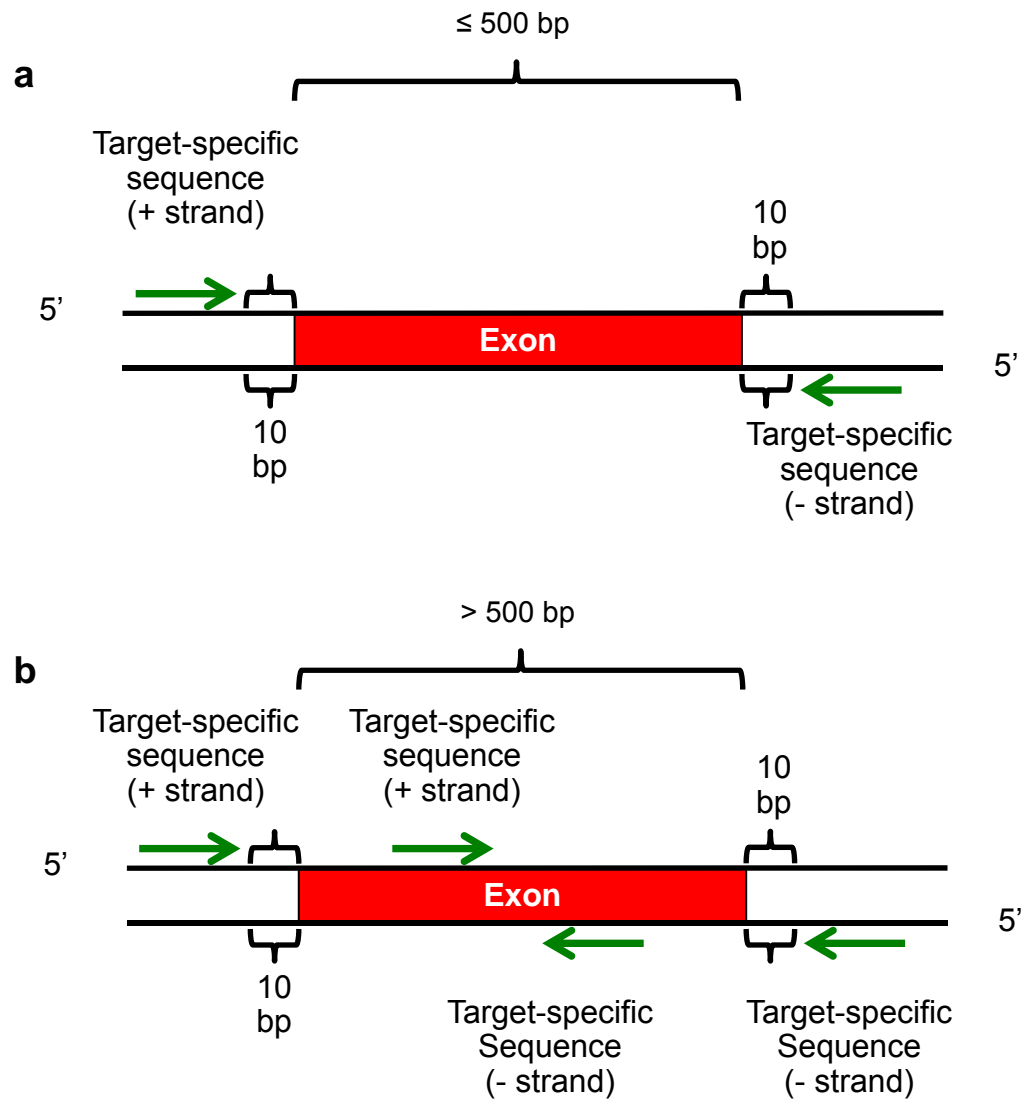

**Supplementary Figure 2.** Design strategies for OS-Seq. **(a)** Primer-probes were placed 10 bases from the exon or **(b)** tiled every 500 bases inside large exons.

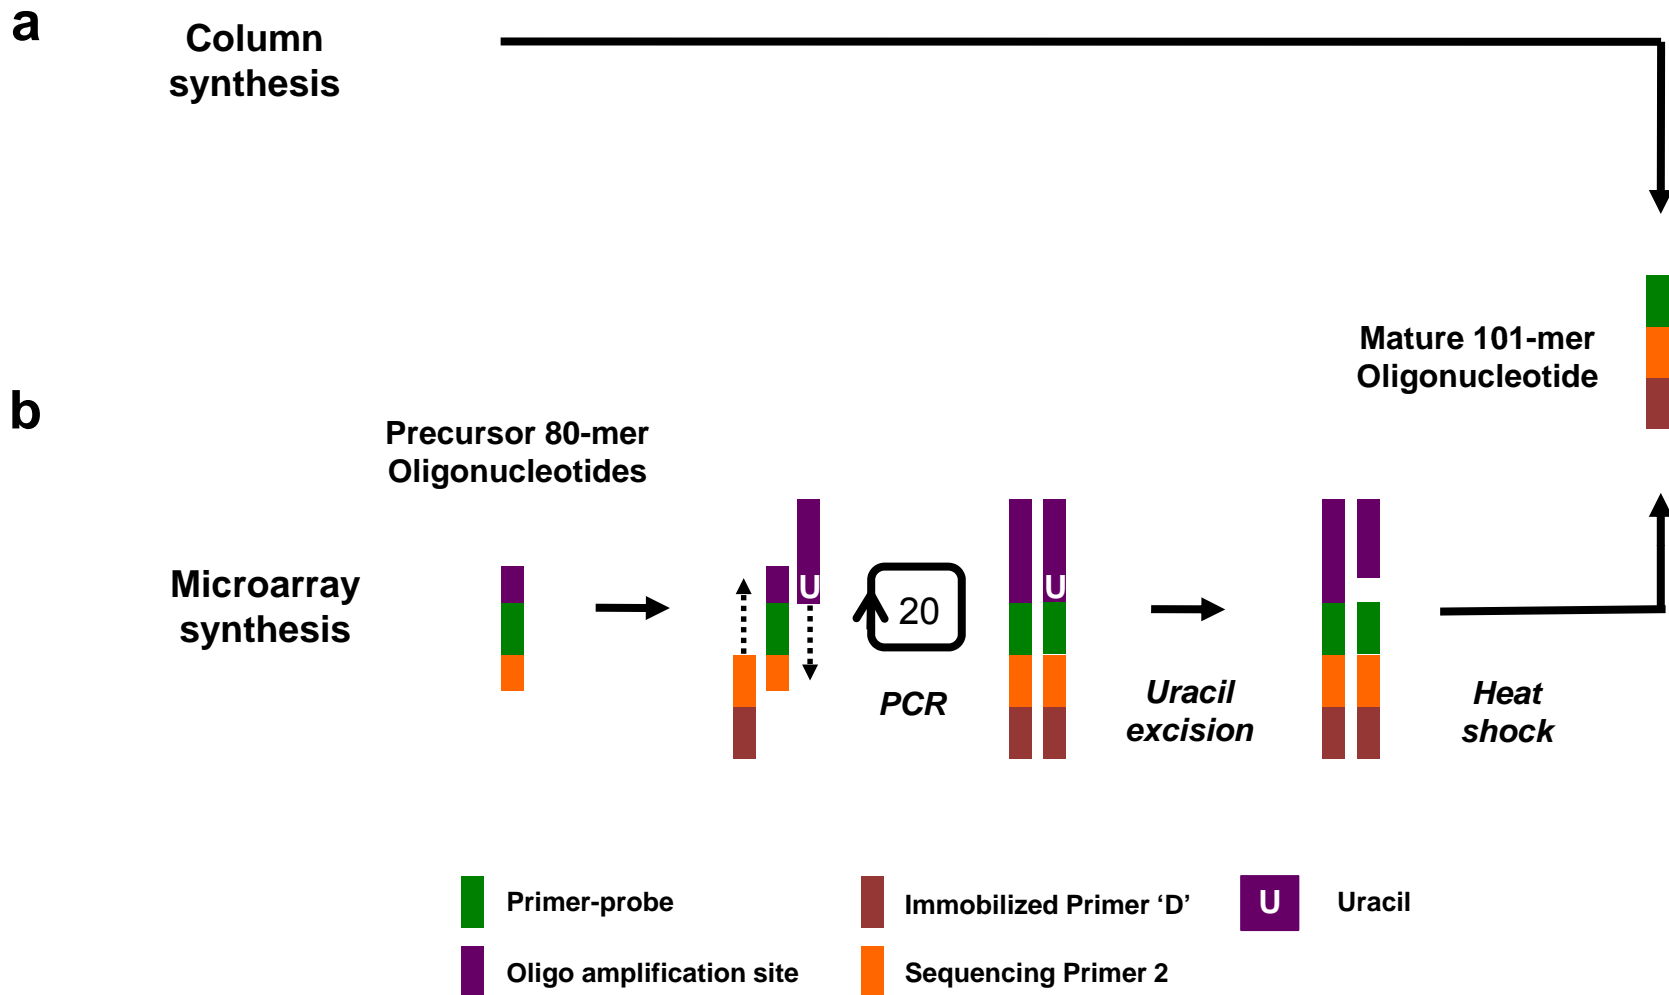

**Supplementary Figure 3.** Generation of OS-Seq oligonucleotides. **(a)** Column-synthesis yielded large amount of mature 101-mer OS-Seq oligonucleotides that were readily usable in the assay. **(b)** Microarray-synthesis was applied to generate high-content oligonucleotide pools. Precursor oligonucleotides were amplified using primers that incorporated additional sequences into oligonucleotides. Uracil excision was applied to cleave the amplification primer site from the coding strands of the OS-seq oligonucleotides.

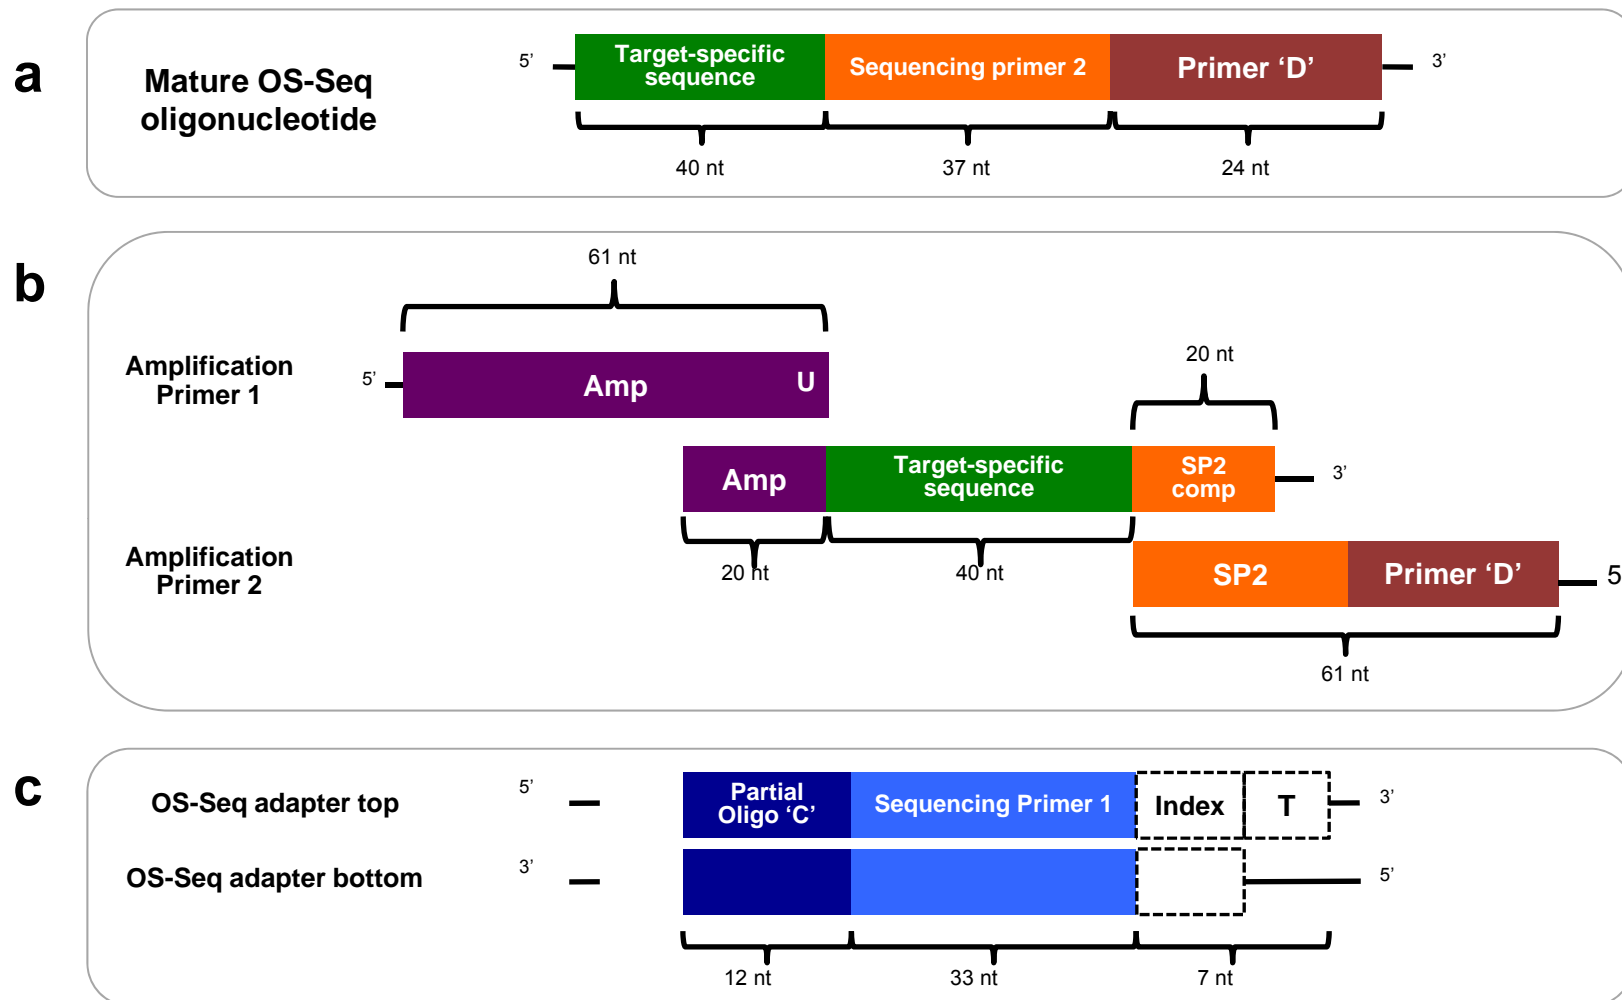

**Supplementary Figure 4.** Structures of oligonucleotide components in OS-Seq. **(a)** Mature 101-mer OS-Seq oligonucleotides contained target-specific site and sequences encoding for sequencing primer 2 and flow cell primer 'D'. **(b)** Microarray-synthesized oligonucleotides were amplified using primers that incorporated uracil to the 5' end of the OS-Seq oligonucleotide and additional active sites for sequencing. **(c)** Adapter for OS-Seq contained T-overhang for sticky-end ligation to the A-tailed genomic fragments. In addition, indexing sequences as well as flow cell primer 'C' site were present in the dsDNA adapter.



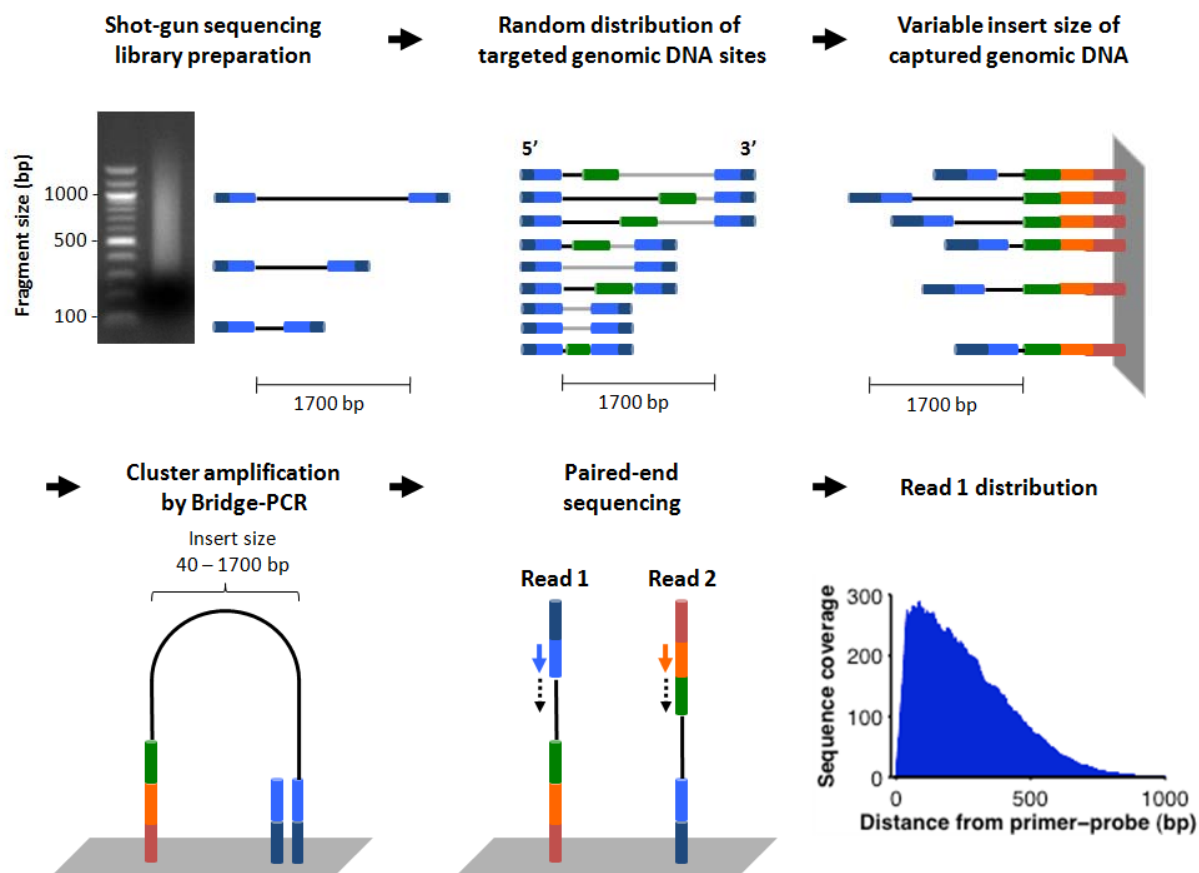

**Supplementary Figure 5.** Description of insert size distributions encountered in OS-Seq data. We produced genomic DNA fragments between 200 and 2kb. Sequencing library preparation adds common adapter to the ends of the fragments. PCR amplification distorts the fragment size distribution further. Target sites are randomly distributed within the single-adaptor library fragments. Library fragments were immobilized on the flow cell and the distance between primer-probe and adapter defined the size of a genomic DNA insert. Bridge-PCR is applied to amplify immobilized target DNA (generally, solid-phase PCR preferentially amplifies shorter fragments). After cluster amplification and processing, immobilized fragments are sequenced using two sites. Read 1 originates from the genomic DNA and Read 2 is derived from the synthetic primer-probes. Read 1 is used for assessing the genomic DNA sequence from OS-Seq data.

**a**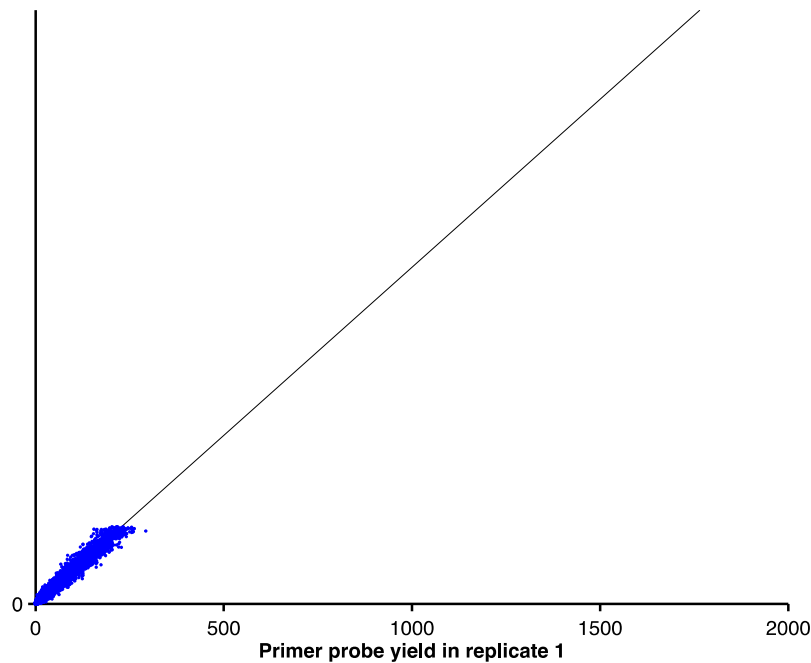**b**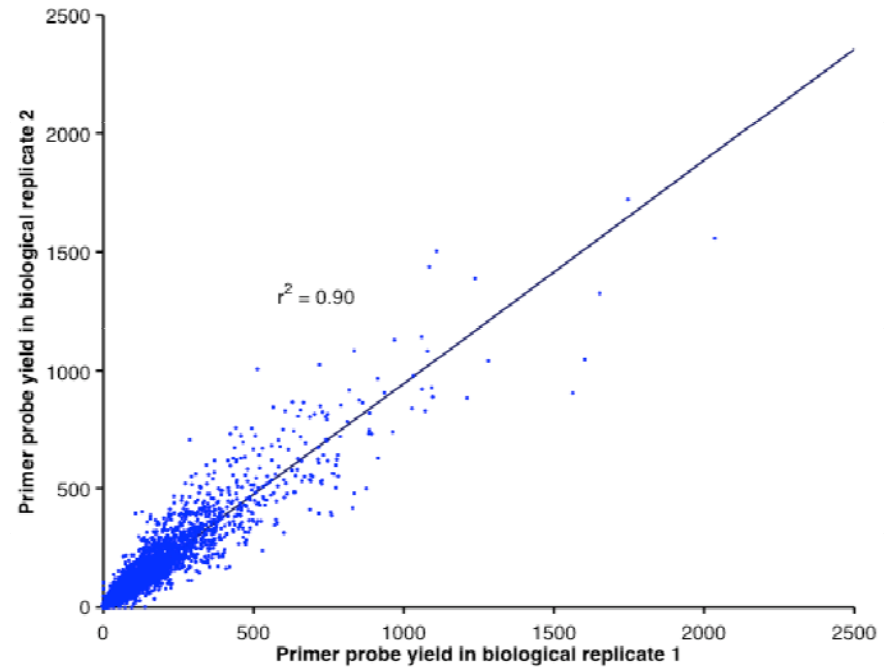

**Supplementary Figure 6.** Reproducibility of OS-Seq. **(a)** Technical reproducibility of OS-Seq. Two identical libraries were analyzed using OS-Seq. Sequencing yields of individual primer-probes were compared between technical replicates. **(b)** Biological reproducibility of OS-Seq. Two different genomic DNA libraries were prepared using indexed adapters. Libraries were analyzed in the same OS-Seq experiment. In the figure, primer-probe specific capture yields are compared between two independent biological replicates.

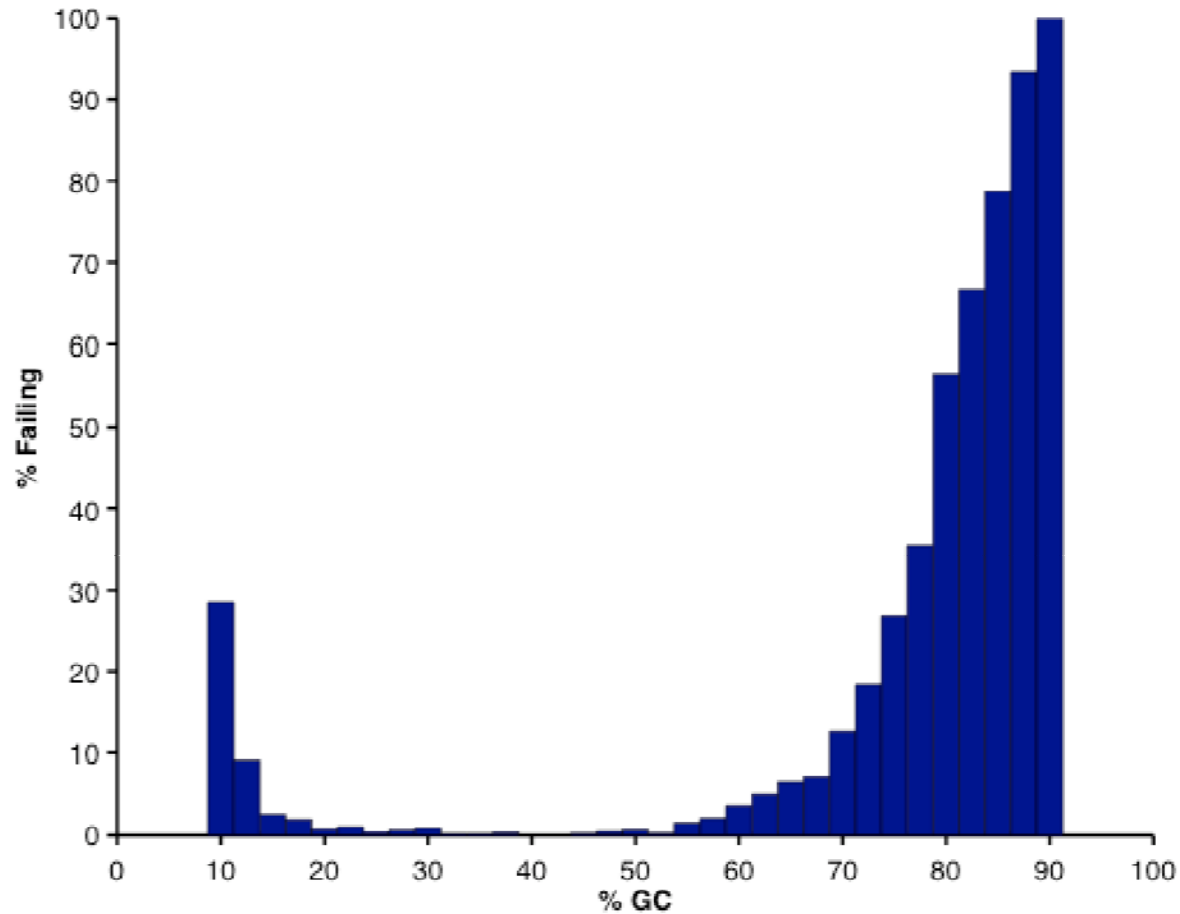

**Supplementary Figure 7.** Effect of GC content on targeting yield. To analyze the effect of GC content in the efficiency of primer-probes, we determined the GC content of each target-specific primer-probe sequence. We classified primer-probes that were failing (captured 0 targets). Proportions of failing primer-probes were compared between different %CG content categories. The X-axis represents the percentages of the sorted CG categories and y-axis represents the proportion of failed primer-probes within each GC content category.

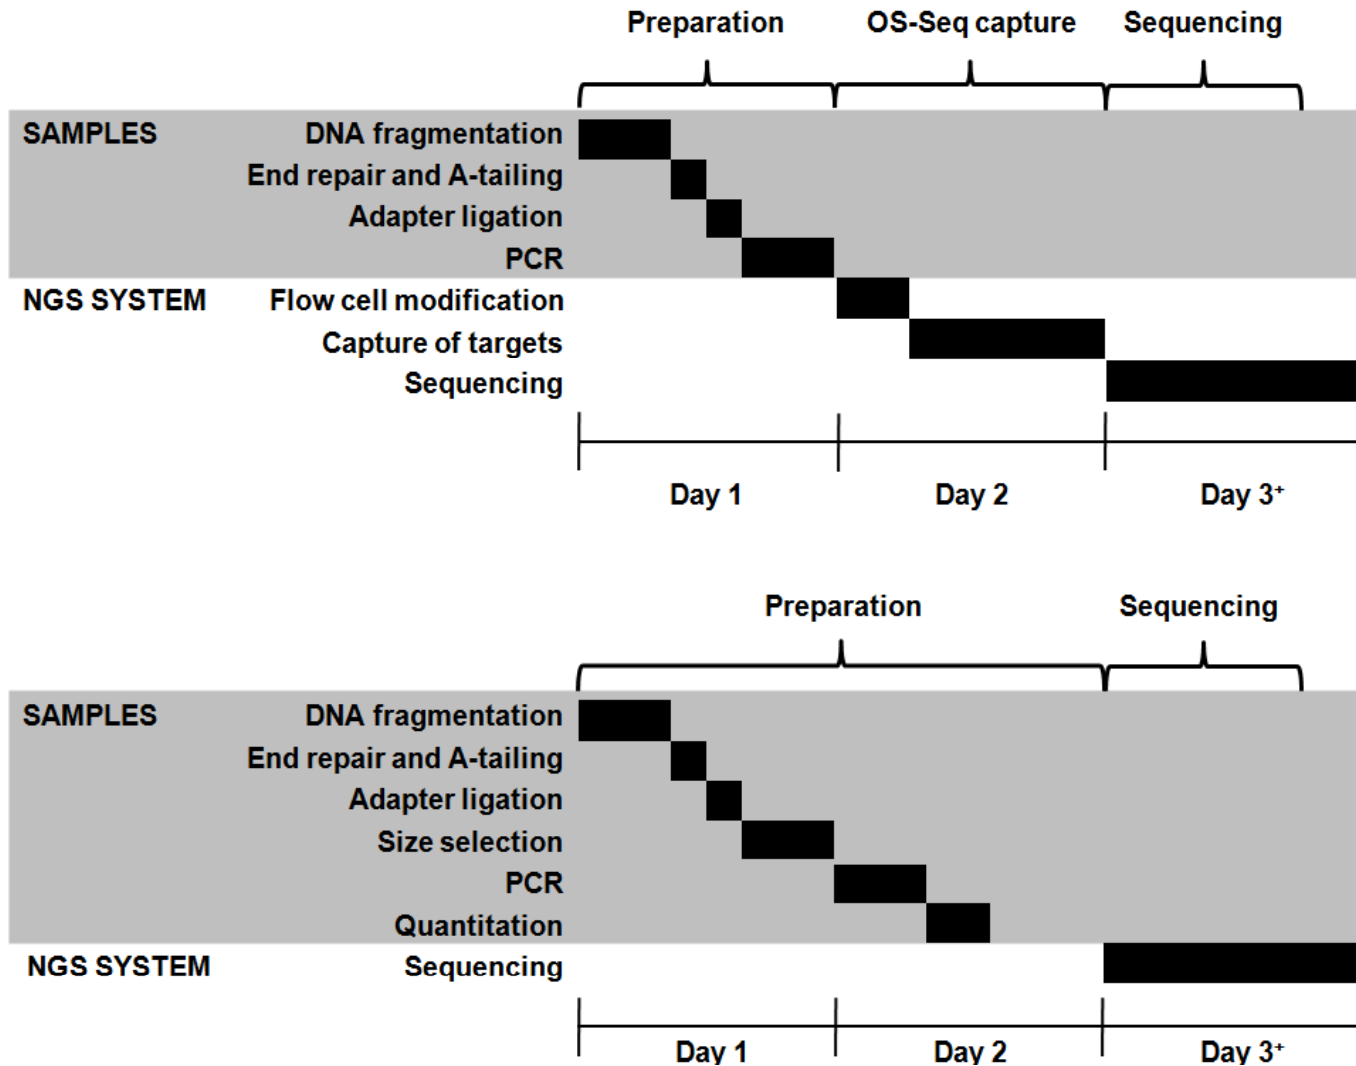

**Supplementary Figure 8.** Comparison of the processing workflow for OS-Seq and genome shotgun library creation methods. This workflow comparison shows that OS-Seq targeted sequencing is comparable to complete genome sequencing process.
